# Supplementary material for: Innate biosignature of treatment failure in human cutaneous leishmaniasis
Source: Research Square preprint supplement (doi:10.21203/rs.3.rs-4271873/v1), 2024-05-02
Supplement: Supplementary file 1 [file 0081e4fb0f157e465ac235bc.xlsx]

## Sheet: Monocyte_Enrichment_All
#category	term ID	term description	observed gene count	background gene count	strength	false discovery rate	matching proteins in your network (IDs)	matching proteins in your network (labels)
TISSUES	BTO:0000801	Macrophage	6	71	1.17	0.0097	9606.ENSP00000263341,9606.ENSP00000341610,9606.ENSP00000357022,9606.ENSP00000385675,9606.ENSP00000386559,9606.ENSP00000455897	IL1B,C15orf48,SLAMF7,IL6,CD8A,MRC1
TISSUES	BTO:0001823	Synovium	6	82	1.11	0.0105	9606.ENSP00000263341,9606.ENSP00000309124,9606.ENSP00000322788,9606.ENSP00000355387,9606.ENSP00000357022,9606.ENSP00000385675	IL1B,OLR1,MMP1,SCAMP5,SLAMF7,IL6
STRING clusters	CL:18595	Interleukin-1 conserved site, and interleukin-1 receptor activity	3	6	1.94	0.0167	9606.ENSP00000263341,9606.ENSP00000330959,9606.ENSP00000386380	IL1B,IL1R2,IL1R1
STRING clusters	CL:19313	MHC class II protein complex, and Testicular lymphoma	5	18	1.69	0.00077	9606.ENSP00000339398,9606.ENSP00000363976,9606.ENSP00000364080,9606.ENSP00000370989,9606.ENSP00000390431	HLA-DQA1,HLA-DMA,HLA-DQB1,CD274,HLA-DQB2
GO Process	GO:0002251	Organ or tissue specific immune response	4	40	1.24	0.0303	9606.ENSP00000231751,9606.ENSP00000296435,9606.ENSP00000328359,9606.ENSP00000385675	LTF,CAMP,DEFA3,IL6
GO Process	GO:0002726	Positive regulation of t cell cytokine production	4	20	1.54	0.0068	9606.ENSP00000263341,9606.ENSP00000371471,9606.ENSP00000385675,9606.ENSP00000386380	IL1B,RSAD2,IL6,IL1R1
GO Process	GO:0002830	Positive regulation of type 2 immune response	3	16	1.52	0.0411	9606.ENSP00000371471,9606.ENSP00000385675,9606.ENSP00000430950	RSAD2,IL6,IDO1
GO Process	GO:0014015	Positive regulation of gliogenesis	5	72	1.08	0.0238	9606.ENSP00000263341,9606.ENSP00000278550,9606.ENSP00000385675,9606.ENSP00000386884,9606.ENSP00000477908	IL1B,TENM4,IL6,CXCR4,CCL3
GO Component	GO:0042613	MHC class II protein complex	4	14	1.7	0.0024	9606.ENSP00000339398,9606.ENSP00000363976,9606.ENSP00000364080,9606.ENSP00000390431	HLA-DQA1,HLA-DMA,HLA-DQB1,HLA-DQB2
GO Process	GO:0050832	Defense response to fungus	4	48	1.16	0.049	9606.ENSP00000216336,9606.ENSP00000231751,9606.ENSP00000296435,9606.ENSP00000328359	CTSG,LTF,CAMP,DEFA3
GO Process	GO:0051702	Interaction with symbiont	6	93	1.05	0.0109	9606.ENSP00000216336,9606.ENSP00000231751,9606.ENSP00000296435,9606.ENSP00000378118,9606.ENSP00000477908,9606.ENSP00000483430	CTSG,LTF,CAMP,CCL8,CCL3,IFI27
GO Function	GO:0140375	Immune receptor activity	8	132	1.02	0.0044	9606.ENSP00000216223,9606.ENSP00000330959,9606.ENSP00000339398,9606.ENSP00000364080,9606.ENSP00000386380,9606.ENSP00000386884,9606.ENSP00000390431,9606.ENSP00000482954	IL2RB,IL1R2,HLA-DQA1,HLA-DQB1,IL1R1,CXCR4,HLA-DQB2,PRLR
GO Process	GO:2000659	Regulation of interleukin-1-mediated signaling pathway	3	8	1.82	0.0123	9606.ENSP00000330959,9606.ENSP00000385675,9606.ENSP00000386380	IL1R2,IL6,IL1R1
COMPARTMENTS	GOCC:0012507	ER to Golgi transport vesicle membrane	4	47	1.17	0.0334	9606.ENSP00000339398,9606.ENSP00000364080,9606.ENSP00000377284,9606.ENSP00000390431	HLA-DQA1,HLA-DQB1,FOLR1,HLA-DQB2
COMPARTMENTS	GOCC:0030658	Transport vesicle membrane	6	103	1.01	0.0089	9606.ENSP00000272371,9606.ENSP00000295987,9606.ENSP00000339398,9606.ENSP00000364080,9606.ENSP00000377284,9606.ENSP00000390431	OTOF,SYN1,HLA-DQA1,HLA-DQB1,FOLR1,HLA-DQB2
COMPARTMENTS	GOCC:0042613	MHC class II protein complex	4	14	1.7	0.0022	9606.ENSP00000339398,9606.ENSP00000363976,9606.ENSP00000364080,9606.ENSP00000390431	HLA-DQA1,HLA-DMA,HLA-DQB1,HLA-DQB2
COMPARTMENTS	GOCC:0043514	interleukin-12 complex	4	24	1.46	0.0062	9606.ENSP00000263341,9606.ENSP00000385675,9606.ENSP00000386559,9606.ENSP00000477908	IL1B,IL6,CD8A,CCL3
COMPARTMENTS	GOCC:0099126	Transforming growth factor beta complex	3	22	1.38	0.0458	9606.ENSP00000263341,9606.ENSP00000385675,9606.ENSP00000386559	IL1B,IL6,CD8A
KEGG	hsa01523	Antifolate resistance	3	31	1.23	0.0244	9606.ENSP00000263341,9606.ENSP00000377284,9606.ENSP00000385675	IL1B,FOLR1,IL6
KEGG	hsa04640	Hematopoietic cell lineage	7	91	1.13	0.00049	9606.ENSP00000263341,9606.ENSP00000330959,9606.ENSP00000339398,9606.ENSP00000363976,9606.ENSP00000385675,9606.ENSP00000386380,9606.ENSP00000386559	IL1B,IL1R2,HLA-DQA1,HLA-DMA,IL6,IL1R1,CD8A
KEGG	hsa04659	Th17 cell differentiation	6	101	1.02	0.0027	9606.ENSP00000216223,9606.ENSP00000263341,9606.ENSP00000339398,9606.ENSP00000363976,9606.ENSP00000385675,9606.ENSP00000386380	IL2RB,IL1B,HLA-DQA1,HLA-DMA,IL6,IL1R1
KEGG	hsa04672	Intestinal immune network for IgA production	4	43	1.21	0.0062	9606.ENSP00000339398,9606.ENSP00000363976,9606.ENSP00000385675,9606.ENSP00000386884	HLA-DQA1,HLA-DMA,IL6,CXCR4
KEGG	hsa04940	Type I diabetes mellitus	4	39	1.25	0.005	9606.ENSP00000216341,9606.ENSP00000263341,9606.ENSP00000339398,9606.ENSP00000363976	GZMB,IL1B,HLA-DQA1,HLA-DMA
KEGG	hsa05143	African trypanosomiasis	3	36	1.16	0.0297	9606.ENSP00000263341,9606.ENSP00000385675,9606.ENSP00000430950	IL1B,IL6,IDO1
KEGG	hsa05144	Malaria	3	46	1.06	0.0417	9606.ENSP00000260356,9606.ENSP00000263341,9606.ENSP00000385675	THBS1,IL1B,IL6
KEGG	hsa05146	Amoebiasis	6	100	1.02	0.0027	9606.ENSP00000216336,9606.ENSP00000263341,9606.ENSP00000304408,9606.ENSP00000330959,9606.ENSP00000385675,9606.ENSP00000386380	CTSG,IL1B,COL3A1,IL1R2,IL6,IL1R1
KEGG	hsa05320	Autoimmune thyroid disease	3	48	1.04	0.0429	9606.ENSP00000216341,9606.ENSP00000339398,9606.ENSP00000363976	GZMB,HLA-DQA1,HLA-DMA
KEGG	hsa05321	Inflammatory bowel disease	4	60	1.07	0.0163	9606.ENSP00000263341,9606.ENSP00000339398,9606.ENSP00000363976,9606.ENSP00000385675	IL1B,HLA-DQA1,HLA-DMA,IL6
KEGG	hsa05323	Rheumatoid arthritis	6	85	1.09	0.0015	9606.ENSP00000263341,9606.ENSP00000322788,9606.ENSP00000339398,9606.ENSP00000363976,9606.ENSP00000385675,9606.ENSP00000477908	IL1B,MMP1,HLA-DQA1,HLA-DMA,IL6,CCL3
KEGG	hsa05330	Allograft rejection	3	34	1.19	0.0291	9606.ENSP00000216341,9606.ENSP00000339398,9606.ENSP00000363976	GZMB,HLA-DQA1,HLA-DMA
KEGG	hsa05332	Graft-versus-host disease	5	36	1.38	0.00058	9606.ENSP00000216341,9606.ENSP00000263341,9606.ENSP00000339398,9606.ENSP00000363976,9606.ENSP00000385675	GZMB,IL1B,HLA-DQA1,HLA-DMA,IL6
Reactome	HSA-6783783	Interleukin-10 signaling	5	45	1.29	0.0102	9606.ENSP00000263341,9606.ENSP00000330959,9606.ENSP00000385675,9606.ENSP00000386380,9606.ENSP00000477908	IL1B,IL1R2,IL6,IL1R1,CCL3
InterPro	IPR003597	Immunoglobulin C1-set	5	43	1.31	0.0104	9606.ENSP00000305529,9606.ENSP00000339398,9606.ENSP00000363976,9606.ENSP00000364080,9606.ENSP00000390431	SIRPG,HLA-DQA1,HLA-DMA,HLA-DQB1,HLA-DQB2
InterPro	IPR014745	MHC class II, alpha/beta chain, N-terminal	4	15	1.67	0.0061	9606.ENSP00000339398,9606.ENSP00000363976,9606.ENSP00000364080,9606.ENSP00000390431	HLA-DQA1,HLA-DMA,HLA-DQB1,HLA-DQB2
Pfam	PF07654	Immunoglobulin C1-set domain	5	46	1.28	0.0239	9606.ENSP00000305529,9606.ENSP00000339398,9606.ENSP00000363976,9606.ENSP00000364080,9606.ENSP00000390431	SIRPG,HLA-DQA1,HLA-DMA,HLA-DQB1,HLA-DQB2
Pfam	PF08205	CD80-like C2-set immunoglobulin domain	5	42	1.32	0.0239	9606.ENSP00000305529,9606.ENSP00000339398,9606.ENSP00000341141,9606.ENSP00000370989,9606.ENSP00000390431	SIRPG,HLA-DQA1,SIGLEC1,CD274,HLA-DQB2
SMART	SM00407	Immunoglobulin C-Type	5	38	1.36	0.0032	9606.ENSP00000305529,9606.ENSP00000339398,9606.ENSP00000363976,9606.ENSP00000364080,9606.ENSP00000390431	SIRPG,HLA-DQA1,HLA-DMA,HLA-DQB1,HLA-DQB2
GO Process	GO:0001906	Cell killing	7	126	0.99	0.0071	9606.ENSP00000216336,9606.ENSP00000216341,9606.ENSP00000231751,9606.ENSP00000296435,9606.ENSP00000328359,9606.ENSP00000357022,9606.ENSP00000378118	CTSG,GZMB,LTF,CAMP,DEFA3,SLAMF7,CCL8
TISSUES	BTO:0001441	Marrow cell	6	108	0.99	0.0114	9606.ENSP00000216336,9606.ENSP00000263341,9606.ENSP00000294413,9606.ENSP00000308782,9606.ENSP00000341141,9606.ENSP00000386884	CTSG,IL1B,RHCE,GP6,SIGLEC1,CXCR4
GO Process	GO:0031640	Killing of cells of other organism	5	91	0.98	0.049	9606.ENSP00000216336,9606.ENSP00000231751,9606.ENSP00000296435,9606.ENSP00000328359,9606.ENSP00000378118	CTSG,LTF,CAMP,DEFA3,CCL8
GO Process	GO:0035821	Modulation of process of other organism	6	115	0.96	0.0216	9606.ENSP00000231751,9606.ENSP00000296435,9606.ENSP00000328359,9606.ENSP00000378118,9606.ENSP00000477908,9606.ENSP00000483430	LTF,CAMP,DEFA3,CCL8,CCL3,IFI27
KEGG	hsa04061	Viral protein interaction with cytokine and cytokine receptor	5	96	0.96	0.0105	9606.ENSP00000216223,9606.ENSP00000378118,9606.ENSP00000385675,9606.ENSP00000386884,9606.ENSP00000477908	IL2RB,CCL8,IL6,CXCR4,CCL3
KEGG	hsa05150	Staphylococcus aureus infection	4	86	0.91	0.0308	9606.ENSP00000296435,9606.ENSP00000328359,9606.ENSP00000339398,9606.ENSP00000363976	CAMP,DEFA3,HLA-DQA1,HLA-DMA
GO Process	GO:0071222	Cellular response to lipopolysaccharide	8	185	0.88	0.0086	9606.ENSP00000216336,9606.ENSP00000263341,9606.ENSP00000328359,9606.ENSP00000362108,9606.ENSP00000370989,9606.ENSP00000385675,9606.ENSP00000455897,9606.ENSP00000477908	CTSG,IL1B,DEFA3,LCN2,CD274,IL6,MRC1,CCL3
KEGG	hsa04657	IL-17 signaling pathway	4	92	0.88	0.0354	9606.ENSP00000263341,9606.ENSP00000322788,9606.ENSP00000362108,9606.ENSP00000385675	IL1B,MMP1,LCN2,IL6
GO Process	GO:0030595	Leukocyte chemotaxis	6	142	0.87	0.049	9606.ENSP00000263341,9606.ENSP00000305416,9606.ENSP00000378118,9606.ENSP00000385675,9606.ENSP00000386884,9606.ENSP00000477908	IL1B,S1PR1,CCL8,IL6,CXCR4,CCL3
GO Component	GO:0030658	Transport vesicle membrane	8	204	0.84	0.0098	9606.ENSP00000246070,9606.ENSP00000272371,9606.ENSP00000295987,9606.ENSP00000339398,9606.ENSP00000355387,9606.ENSP00000364080,9606.ENSP00000377284,9606.ENSP00000390431	LAMP5,OTOF,SYN1,HLA-DQA1,SCAMP5,HLA-DQB1,FOLR1,HLA-DQB2
KEGG	hsa05152	Tuberculosis	6	168	0.8	0.0163	9606.ENSP00000263341,9606.ENSP00000296435,9606.ENSP00000339398,9606.ENSP00000363976,9606.ENSP00000385675,9606.ENSP00000455897	IL1B,CAMP,HLA-DQA1,HLA-DMA,IL6,MRC1
KEGG	hsa04514	Cell adhesion molecules	5	137	0.8	0.0295	9606.ENSP00000339398,9606.ENSP00000341141,9606.ENSP00000363976,9606.ENSP00000370989,9606.ENSP00000386559	HLA-DQA1,SIGLEC1,HLA-DMA,CD274,CD8A
KEGG	hsa05202	Transcriptional misregulation in cancer	6	171	0.79	0.0163	9606.ENSP00000216223,9606.ENSP00000216341,9606.ENSP00000328359,9606.ENSP00000330959,9606.ENSP00000377508,9606.ENSP00000385675	IL2RB,GZMB,DEFA3,IL1R2,JUP,IL6
KEGG	hsa04145	Phagosome	5	142	0.79	0.0301	9606.ENSP00000260356,9606.ENSP00000309124,9606.ENSP00000339398,9606.ENSP00000363976,9606.ENSP00000455897	THBS1,OLR1,HLA-DQA1,HLA-DMA,MRC1
GO Process	GO:0009615	Response to virus	10	293	0.78	0.0068	9606.ENSP00000307305,9606.ENSP00000328359,9606.ENSP00000339587,9606.ENSP00000359787,9606.ENSP00000362108,9606.ENSP00000371471,9606.ENSP00000378118,9606.ENSP00000385675,9606.ENSP00000386884,9606.ENSP00000483430	DDIT4,DEFA3,DFNA5,IFI44L,LCN2,RSAD2,CCL8,IL6,CXCR4,IFI27
GO Process	GO:0060326	Cell chemotaxis	7	204	0.78	0.049	9606.ENSP00000263341,9606.ENSP00000305416,9606.ENSP00000378118,9606.ENSP00000385675,9606.ENSP00000386884,9606.ENSP00000391669,9606.ENSP00000477908	IL1B,S1PR1,CCL8,IL6,CXCR4,BCAR1,CCL3
KEGG	hsa04060	Cytokine-cytokine receptor interaction	9	282	0.75	0.0027	9606.ENSP00000216223,9606.ENSP00000263341,9606.ENSP00000330959,9606.ENSP00000378118,9606.ENSP00000385675,9606.ENSP00000386380,9606.ENSP00000386884,9606.ENSP00000477908,9606.ENSP00000482954	IL2RB,IL1B,IL1R2,CCL8,IL6,IL1R1,CXCR4,CCL3,PRLR
GO Process	GO:0050900	Leukocyte migration	10	316	0.74	0.0096	9606.ENSP00000263341,9606.ENSP00000305416,9606.ENSP00000305529,9606.ENSP00000308782,9606.ENSP00000309124,9606.ENSP00000322788,9606.ENSP00000378118,9606.ENSP00000385675,9606.ENSP00000386884,9606.ENSP00000477908	IL1B,S1PR1,SIRPG,GP6,OLR1,MMP1,CCL8,IL6,CXCR4,CCL3
COMPARTMENTS	GOCC:0030133	Transport vesicle	7	221	0.74	0.0424	9606.ENSP00000272371,9606.ENSP00000295987,9606.ENSP00000339398,9606.ENSP00000364080,9606.ENSP00000377284,9606.ENSP00000378313,9606.ENSP00000390431	OTOF,SYN1,HLA-DQA1,HLA-DQB1,FOLR1,RAB3IL1,HLA-DQB2
COMPARTMENTS	GOCC:0034774	Secretory granule lumen	7	230	0.73	0.0482	9606.ENSP00000216336,9606.ENSP00000231751,9606.ENSP00000260356,9606.ENSP00000296435,9606.ENSP00000328359,9606.ENSP00000362108,9606.ENSP00000377508	CTSG,LTF,THBS1,CAMP,DEFA3,LCN2,JUP
KEGG	hsa05164	Influenza A	5	165	0.72	0.0423	9606.ENSP00000263341,9606.ENSP00000339398,9606.ENSP00000363976,9606.ENSP00000371471,9606.ENSP00000385675	IL1B,HLA-DQA1,HLA-DMA,RSAD2,IL6
COMPARTMENTS	GOCC:0098552	Side of membrane	8	266	0.72	0.0309	9606.ENSP00000216223,9606.ENSP00000260356,9606.ENSP00000339398,9606.ENSP00000364080,9606.ENSP00000377284,9606.ENSP00000379678,9606.ENSP00000386559,9606.ENSP00000390431	IL2RB,THBS1,HLA-DQA1,HLA-DQB1,FOLR1,PGM5,CD8A,HLA-DQB2
InterPro	IPR007110	Immunoglobulin-like domain	14	468	0.72	0.0042	9606.ENSP00000301202,9606.ENSP00000305529,9606.ENSP00000308782,9606.ENSP00000330959,9606.ENSP00000334329,9606.ENSP00000339398,9606.ENSP00000341141,9606.ENSP00000357022,9606.ENSP00000363976,9606.ENSP00000364080,9606.ENSP00000370989,9606.ENSP00000386380,9606.ENSP00000386559,9606.ENSP00000390431	LAIR2,SIRPG,GP6,IL1R2,UNC5B,HLA-DQA1,SIGLEC1,SLAMF7,HLA-DMA,HLA-DQB1,CD274,IL1R1,CD8A,HLA-DQB2
GO Process	GO:0006959	Humoral immune response	8	275	0.71	0.049	9606.ENSP00000216336,9606.ENSP00000231751,9606.ENSP00000296435,9606.ENSP00000328359,9606.ENSP00000362108,9606.ENSP00000364080,9606.ENSP00000378118,9606.ENSP00000385675	CTSG,LTF,CAMP,DEFA3,LCN2,HLA-DQB1,CCL8,IL6
InterPro	IPR036179	Immunoglobulin-like domain superfamily	14	477	0.71	0.0042	9606.ENSP00000301202,9606.ENSP00000305529,9606.ENSP00000308782,9606.ENSP00000330959,9606.ENSP00000334329,9606.ENSP00000339398,9606.ENSP00000341141,9606.ENSP00000357022,9606.ENSP00000363976,9606.ENSP00000364080,9606.ENSP00000370989,9606.ENSP00000386380,9606.ENSP00000386559,9606.ENSP00000390431	LAIR2,SIRPG,GP6,IL1R2,UNC5B,HLA-DQA1,SIGLEC1,SLAMF7,HLA-DMA,HLA-DQB1,CD274,IL1R1,CD8A,HLA-DQB2
GO Process	GO:0032496	Response to lipopolysaccharide	9	313	0.7	0.0264	9606.ENSP00000216336,9606.ENSP00000263341,9606.ENSP00000328359,9606.ENSP00000362108,9606.ENSP00000370989,9606.ENSP00000385675,9606.ENSP00000430950,9606.ENSP00000455897,9606.ENSP00000477908	CTSG,IL1B,DEFA3,LCN2,CD274,IL6,IDO1,MRC1,CCL3
KEGG	hsa05166	Human T-cell leukemia virus 1 infection	6	211	0.7	0.0301	9606.ENSP00000216223,9606.ENSP00000330959,9606.ENSP00000339398,9606.ENSP00000363976,9606.ENSP00000385675,9606.ENSP00000386380	IL2RB,IL1R2,HLA-DQA1,HLA-DMA,IL6,IL1R1
GO Component	GO:0098552	Side of membrane	15	531	0.69	0.00082	9606.ENSP00000216223,9606.ENSP00000260356,9606.ENSP00000305416,9606.ENSP00000339398,9606.ENSP00000359532,9606.ENSP00000364080,9606.ENSP00000370989,9606.ENSP00000377284,9606.ENSP00000377508,9606.ENSP00000379678,9606.ENSP00000386380,9606.ENSP00000386559,9606.ENSP00000386884,9606.ENSP00000390431,9606.ENSP00000482954	IL2RB,THBS1,S1PR1,HLA-DQA1,NTSR1,HLA-DQB1,CD274,FOLR1,JUP,PGM5,IL1R1,CD8A,CXCR4,HLA-DQB2,PRLR
GO Component	GO:0009897	External side of plasma membrane	9	331	0.68	0.0302	9606.ENSP00000216223,9606.ENSP00000260356,9606.ENSP00000305416,9606.ENSP00000370989,9606.ENSP00000377284,9606.ENSP00000386380,9606.ENSP00000386559,9606.ENSP00000386884,9606.ENSP00000482954	IL2RB,THBS1,S1PR1,CD274,FOLR1,IL1R1,CD8A,CXCR4,PRLR
KEGG	hsa05163	Human cytomegalovirus infection	6	218	0.68	0.0308	9606.ENSP00000263341,9606.ENSP00000385675,9606.ENSP00000386380,9606.ENSP00000386884,9606.ENSP00000391669,9606.ENSP00000477908	IL1B,IL6,IL1R1,CXCR4,BCAR1,CCL3
GO Process	GO:0019221	Cytokine-mediated signaling pathway	17	678	0.64	0.00047	9606.ENSP00000216223,9606.ENSP00000263341,9606.ENSP00000305416,9606.ENSP00000322788,9606.ENSP00000330959,9606.ENSP00000339398,9606.ENSP00000362108,9606.ENSP00000364080,9606.ENSP00000371471,9606.ENSP00000378118,9606.ENSP00000385675,9606.ENSP00000386380,9606.ENSP00000386884,9606.ENSP00000390431,9606.ENSP00000477908,9606.ENSP00000482954,9606.ENSP00000483430	IL2RB,IL1B,S1PR1,MMP1,IL1R2,HLA-DQA1,LCN2,HLA-DQB1,RSAD2,CCL8,IL6,IL1R1,CXCR4,HLA-DQB2,CCL3,PRLR,IFI27
InterPro	IPR013783	Immunoglobulin-like fold	17	710	0.62	0.0042	9606.ENSP00000216223,9606.ENSP00000297866,9606.ENSP00000301202,9606.ENSP00000305529,9606.ENSP00000308782,9606.ENSP00000330959,9606.ENSP00000334329,9606.ENSP00000339398,9606.ENSP00000341141,9606.ENSP00000357022,9606.ENSP00000363976,9606.ENSP00000364080,9606.ENSP00000370989,9606.ENSP00000386380,9606.ENSP00000386559,9606.ENSP00000390431,9606.ENSP00000482954	IL2RB,CXorf22,LAIR2,SIRPG,GP6,IL1R2,UNC5B,HLA-DQA1,SIGLEC1,SLAMF7,HLA-DMA,HLA-DQB1,CD274,IL1R1,CD8A,HLA-DQB2,PRLR
COMPARTMENTS	GOCC:0009986	Cell surface	10	433	0.61	0.034	9606.ENSP00000216223,9606.ENSP00000231751,9606.ENSP00000260356,9606.ENSP00000308782,9606.ENSP00000363976,9606.ENSP00000370989,9606.ENSP00000377284,9606.ENSP00000386559,9606.ENSP00000386884,9606.ENSP00000482954	IL2RB,LTF,THBS1,GP6,HLA-DMA,CD274,FOLR1,CD8A,CXCR4,PRLR
Reactome	HSA-1280215	Cytokine Signaling in Immune system	15	681	0.59	0.0102	9606.ENSP00000215794,9606.ENSP00000216223,9606.ENSP00000216336,9606.ENSP00000263341,9606.ENSP00000305416,9606.ENSP00000322788,9606.ENSP00000330959,9606.ENSP00000362108,9606.ENSP00000364080,9606.ENSP00000371471,9606.ENSP00000385675,9606.ENSP00000386380,9606.ENSP00000477908,9606.ENSP00000482954,9606.ENSP00000483430	USP18,IL2RB,CTSG,IL1B,S1PR1,MMP1,IL1R2,LCN2,HLA-DQB1,RSAD2,IL6,IL1R1,CCL3,PRLR,IFI27
COMPARTMENTS	GOCC:1903561	Extracellular vesicle	10	444	0.59	0.0388	9606.ENSP00000216336,9606.ENSP00000231751,9606.ENSP00000260356,9606.ENSP00000296435,9606.ENSP00000308782,9606.ENSP00000362108,9606.ENSP00000370989,9606.ENSP00000377284,9606.ENSP00000379822,9606.ENSP00000386884	CTSG,LTF,THBS1,CAMP,GP6,LCN2,CD274,FOLR1,SLC12A1,CXCR4
UniProt Keywords	KW-0393	Immunoglobulin domain	10	448	0.59	0.0325	9606.ENSP00000301202,9606.ENSP00000305529,9606.ENSP00000308782,9606.ENSP00000330959,9606.ENSP00000334329,9606.ENSP00000341141,9606.ENSP00000357022,9606.ENSP00000370989,9606.ENSP00000386380,9606.ENSP00000386559	LAIR2,SIRPG,GP6,IL1R2,UNC5B,SIGLEC1,SLAMF7,CD274,IL1R1,CD8A
GO Process	GO:0098542	Defense response to other organism	19	900	0.57	0.00098	9606.ENSP00000216336,9606.ENSP00000216341,9606.ENSP00000231751,9606.ENSP00000296435,9606.ENSP00000307305,9606.ENSP00000328359,9606.ENSP00000339398,9606.ENSP00000355437,9606.ENSP00000357022,9606.ENSP00000359787,9606.ENSP00000362108,9606.ENSP00000364080,9606.ENSP00000371471,9606.ENSP00000378118,9606.ENSP00000385675,9606.ENSP00000390431,9606.ENSP00000455897,9606.ENSP00000477908,9606.ENSP00000483430	CTSG,GZMB,LTF,CAMP,DDIT4,DEFA3,HLA-DQA1,TRIM58,SLAMF7,IFI44L,LCN2,HLA-DQB1,RSAD2,CCL8,IL6,HLA-DQB2,MRC1,CCL3,IFI27
GO Process	GO:0045087	Innate immune response	15	703	0.57	0.0084	9606.ENSP00000216341,9606.ENSP00000231751,9606.ENSP00000296435,9606.ENSP00000328359,9606.ENSP00000339398,9606.ENSP00000355437,9606.ENSP00000357022,9606.ENSP00000362108,9606.ENSP00000364080,9606.ENSP00000371471,9606.ENSP00000378118,9606.ENSP00000390431,9606.ENSP00000455897,9606.ENSP00000477908,9606.ENSP00000483430	GZMB,LTF,CAMP,DEFA3,HLA-DQA1,TRIM58,SLAMF7,LCN2,HLA-DQB1,RSAD2,CCL8,HLA-DQB2,MRC1,CCL3,IFI27
GO Process	GO:0006954	Inflammatory response	11	515	0.57	0.049	9606.ENSP00000260356,9606.ENSP00000263341,9606.ENSP00000296435,9606.ENSP00000309124,9606.ENSP00000341141,9606.ENSP00000378118,9606.ENSP00000385675,9606.ENSP00000386380,9606.ENSP00000386884,9606.ENSP00000430950,9606.ENSP00000477908	THBS1,IL1B,CAMP,OLR1,SIGLEC1,CCL8,IL6,IL1R1,CXCR4,IDO1,CCL3
UniProt Keywords	KW-0391	Immunity	11	522	0.57	0.0313	9606.ENSP00000231751,9606.ENSP00000309124,9606.ENSP00000357022,9606.ENSP00000362108,9606.ENSP00000363976,9606.ENSP00000364080,9606.ENSP00000370989,9606.ENSP00000371471,9606.ENSP00000386559,9606.ENSP00000430950,9606.ENSP00000483430	LTF,OLR1,SLAMF7,LCN2,HLA-DMA,HLA-DQB1,CD274,RSAD2,CD8A,IDO1,IFI27
GO Process	GO:0051707	Response to other organism	26	1256	0.56	3.19e-05	9606.ENSP00000216336,9606.ENSP00000216341,9606.ENSP00000231751,9606.ENSP00000263341,9606.ENSP00000296435,9606.ENSP00000307305,9606.ENSP00000328359,9606.ENSP00000339398,9606.ENSP00000339587,9606.ENSP00000341610,9606.ENSP00000355437,9606.ENSP00000357022,9606.ENSP00000359787,9606.ENSP00000362108,9606.ENSP00000364080,9606.ENSP00000370989,9606.ENSP00000371471,9606.ENSP00000378118,9606.ENSP00000385675,…	CTSG,GZMB,LTF,IL1B,CAMP,DDIT4,DEFA3,HLA-DQA1,DFNA5,C15orf48,TRIM58,SLAMF7,IFI44L,LCN2,HLA-DQB1,CD274,RSAD2,CCL8,IL6,CXCR4,HLA-DQB2,IDO1,MRC1,CCL3,PRLR,IFI27
GO Process	GO:0034097	Response to cytokine	23	1101	0.56	0.00011	9606.ENSP00000216223,9606.ENSP00000260356,9606.ENSP00000263341,9606.ENSP00000304408,9606.ENSP00000305416,9606.ENSP00000322788,9606.ENSP00000330959,9606.ENSP00000339398,9606.ENSP00000339587,9606.ENSP00000362108,9606.ENSP00000364080,9606.ENSP00000370989,9606.ENSP00000371471,9606.ENSP00000378118,9606.ENSP00000385675,9606.ENSP00000386380,9606.ENSP00000386884,9606.ENSP00000390431,9606.ENSP00000404232,…	IL2RB,THBS1,IL1B,COL3A1,S1PR1,MMP1,IL1R2,HLA-DQA1,DFNA5,LCN2,HLA-DQB1,CD274,RSAD2,CCL8,IL6,IL1R1,CXCR4,HLA-DQB2,EFHC2,MRC1,CCL3,PRLR,IFI27
GO Process	GO:0071345	Cellular response to cytokine stimulus	21	1013	0.56	0.00042	9606.ENSP00000216223,9606.ENSP00000260356,9606.ENSP00000263341,9606.ENSP00000305416,9606.ENSP00000322788,9606.ENSP00000330959,9606.ENSP00000339398,9606.ENSP00000339587,9606.ENSP00000362108,9606.ENSP00000364080,9606.ENSP00000371471,9606.ENSP00000378118,9606.ENSP00000385675,9606.ENSP00000386380,9606.ENSP00000386884,9606.ENSP00000390431,9606.ENSP00000404232,9606.ENSP00000455897,9606.ENSP00000477908,…	IL2RB,THBS1,IL1B,S1PR1,MMP1,IL1R2,HLA-DQA1,DFNA5,LCN2,HLA-DQB1,RSAD2,CCL8,IL6,IL1R1,CXCR4,HLA-DQB2,EFHC2,MRC1,CCL3,PRLR,IFI27
GO Component	GO:0009986	Cell surface	17	824	0.56	0.003	9606.ENSP00000216223,9606.ENSP00000216336,9606.ENSP00000231751,9606.ENSP00000260356,9606.ENSP00000305416,9606.ENSP00000308782,9606.ENSP00000359532,9606.ENSP00000363976,9606.ENSP00000370989,9606.ENSP00000372313,9606.ENSP00000377284,9606.ENSP00000386380,9606.ENSP00000386559,9606.ENSP00000386884,9606.ENSP00000437489,9606.ENSP00000455897,9606.ENSP00000482954	IL2RB,CTSG,LTF,THBS1,S1PR1,GP6,NTSR1,HLA-DMA,CD274,MSLN,FOLR1,IL1R1,CD8A,CXCR4,FZD3,MRC1,PRLR
GO Process	GO:0009617	Response to bacterium	13	634	0.55	0.0238	9606.ENSP00000216336,9606.ENSP00000231751,9606.ENSP00000263341,9606.ENSP00000296435,9606.ENSP00000328359,9606.ENSP00000341610,9606.ENSP00000362108,9606.ENSP00000370989,9606.ENSP00000385675,9606.ENSP00000430950,9606.ENSP00000455897,9606.ENSP00000477908,9606.ENSP00000482954	CTSG,LTF,IL1B,CAMP,DEFA3,C15orf48,LCN2,CD274,IL6,IDO1,MRC1,CCL3,PRLR
GO Process	GO:0002443	Leukocyte mediated immunity	13	641	0.55	0.0254	9606.ENSP00000216336,9606.ENSP00000216341,9606.ENSP00000231751,9606.ENSP00000296435,9606.ENSP00000309124,9606.ENSP00000357022,9606.ENSP00000362108,9606.ENSP00000364080,9606.ENSP00000377508,9606.ENSP00000385675,9606.ENSP00000386559,9606.ENSP00000447378,9606.ENSP00000477908	CTSG,GZMB,LTF,CAMP,OLR1,SLAMF7,LCN2,HLA-DQB1,JUP,IL6,CD8A,MGAM,CCL3
GO Process	GO:0006952	Defense response	26	1296	0.54	3.58e-05	9606.ENSP00000216336,9606.ENSP00000216341,9606.ENSP00000231751,9606.ENSP00000260356,9606.ENSP00000263341,9606.ENSP00000296435,9606.ENSP00000307305,9606.ENSP00000309124,9606.ENSP00000328359,9606.ENSP00000339398,9606.ENSP00000341141,9606.ENSP00000355437,9606.ENSP00000357022,9606.ENSP00000359787,9606.ENSP00000362108,9606.ENSP00000364080,9606.ENSP00000371471,9606.ENSP00000378118,9606.ENSP00000385675,…	CTSG,GZMB,LTF,THBS1,IL1B,CAMP,DDIT4,OLR1,DEFA3,HLA-DQA1,SIGLEC1,TRIM58,SLAMF7,IFI44L,LCN2,HLA-DQB1,RSAD2,CCL8,IL6,IL1R1,CXCR4,HLA-DQB2,IDO1,MRC1,CCL3,IFI27
GO Process	GO:0006955	Immune response	31	1588	0.53	6.61e-06	9606.ENSP00000216336,9606.ENSP00000216341,9606.ENSP00000231751,9606.ENSP00000260356,9606.ENSP00000263341,9606.ENSP00000296435,9606.ENSP00000309124,9606.ENSP00000328359,9606.ENSP00000330959,9606.ENSP00000339398,9606.ENSP00000355156,9606.ENSP00000355437,9606.ENSP00000357022,9606.ENSP00000359787,9606.ENSP00000362108,9606.ENSP00000363976,9606.ENSP00000364080,9606.ENSP00000370989,9606.ENSP00000371471,…	CTSG,GZMB,LTF,THBS1,IL1B,CAMP,OLR1,DEFA3,IL1R2,HLA-DQA1,SUCNR1,TRIM58,SLAMF7,IFI44L,LCN2,HLA-DMA,HLA-DQB1,CD274,RSAD2,JUP,CCL8,IL6,IL1R1,CD8A,CXCR4,HLA-DQB2,TENM1,MGAM,MRC1,CCL3,IFI27
GO Process	GO:0002252	Immune effector process	19	969	0.53	0.0025	9606.ENSP00000216336,9606.ENSP00000216341,9606.ENSP00000231751,9606.ENSP00000296435,9606.ENSP00000307305,9606.ENSP00000309124,9606.ENSP00000328359,9606.ENSP00000355156,9606.ENSP00000357022,9606.ENSP00000359787,9606.ENSP00000362108,9606.ENSP00000364080,9606.ENSP00000371471,9606.ENSP00000377508,9606.ENSP00000385675,9606.ENSP00000386559,9606.ENSP00000447378,9606.ENSP00000477908,9606.ENSP00000483430	CTSG,GZMB,LTF,CAMP,DDIT4,OLR1,DEFA3,SUCNR1,SLAMF7,IFI44L,LCN2,HLA-DQB1,RSAD2,JUP,IL6,CD8A,MGAM,CCL3,IFI27
GO Process	GO:0007155	Cell adhesion	17	925	0.51	0.0109	9606.ENSP00000222115,9606.ENSP00000260356,9606.ENSP00000263341,9606.ENSP00000278550,9606.ENSP00000301455,9606.ENSP00000302100,9606.ENSP00000304408,9606.ENSP00000305416,9606.ENSP00000305529,9606.ENSP00000309124,9606.ENSP00000341141,9606.ENSP00000357022,9606.ENSP00000372313,9606.ENSP00000377508,9606.ENSP00000379678,9606.ENSP00000391669,9606.ENSP00000403954	HAS1,THBS1,IL1B,TENM4,ANGPTL4,LGALS4,COL3A1,S1PR1,SIRPG,OLR1,SIGLEC1,SLAMF7,MSLN,JUP,PGM5,BCAR1,TENM1
GO Process	GO:0002684	Positive regulation of immune system process	17	949	0.5	0.0133	9606.ENSP00000216336,9606.ENSP00000260356,9606.ENSP00000263341,9606.ENSP00000297991,9606.ENSP00000305529,9606.ENSP00000339398,9606.ENSP00000355437,9606.ENSP00000364080,9606.ENSP00000370989,9606.ENSP00000371471,9606.ENSP00000378118,9606.ENSP00000385675,9606.ENSP00000386380,9606.ENSP00000390431,9606.ENSP00000391669,9606.ENSP00000430950,9606.ENSP00000477908	CTSG,THBS1,IL1B,AQP3,SIRPG,HLA-DQA1,TRIM58,HLA-DQB1,CD274,RSAD2,CCL8,IL6,IL1R1,HLA-DQB2,BCAR1,IDO1,CCL3
COMPARTMENTS	GOCC:0005615	Extracellular space	18	985	0.5	0.0062	9606.ENSP00000216336,9606.ENSP00000231751,9606.ENSP00000260356,9606.ENSP00000263341,9606.ENSP00000296435,9606.ENSP00000301455,9606.ENSP00000304408,9606.ENSP00000308782,9606.ENSP00000328359,9606.ENSP00000362108,9606.ENSP00000370989,9606.ENSP00000377284,9606.ENSP00000379822,9606.ENSP00000385675,9606.ENSP00000386559,9606.ENSP00000386884,9606.ENSP00000447378,9606.ENSP00000477908	CTSG,LTF,THBS1,IL1B,CAMP,ANGPTL4,COL3A1,GP6,DEFA3,LCN2,CD274,FOLR1,SLC12A1,IL6,CD8A,CXCR4,MGAM,CCL3
GO Process	GO:0016477	Cell migration	16	896	0.49	0.0196	9606.ENSP00000260356,9606.ENSP00000263341,9606.ENSP00000305416,9606.ENSP00000305529,9606.ENSP00000307305,9606.ENSP00000308782,9606.ENSP00000309124,9606.ENSP00000322788,9606.ENSP00000377284,9606.ENSP00000377508,9606.ENSP00000378118,9606.ENSP00000385675,9606.ENSP00000386884,9606.ENSP00000391669,9606.ENSP00000437489,9606.ENSP00000477908	THBS1,IL1B,S1PR1,SIRPG,DDIT4,GP6,OLR1,MMP1,FOLR1,JUP,CCL8,IL6,CXCR4,BCAR1,FZD3,CCL3
GO Process	GO:0050776	Regulation of immune response	16	896	0.49	0.0196	9606.ENSP00000215794,9606.ENSP00000216336,9606.ENSP00000263341,9606.ENSP00000301202,9606.ENSP00000304408,9606.ENSP00000339398,9606.ENSP00000357022,9606.ENSP00000364080,9606.ENSP00000370989,9606.ENSP00000371471,9606.ENSP00000385675,9606.ENSP00000386380,9606.ENSP00000386559,9606.ENSP00000390431,9606.ENSP00000391669,9606.ENSP00000430950	USP18,CTSG,IL1B,LAIR2,COL3A1,HLA-DQA1,SLAMF7,HLA-DQB1,CD274,RSAD2,IL6,IL1R1,CD8A,HLA-DQB2,BCAR1,IDO1
TISSUES	BTO:0000574	Hematopoietic cell	16	933	0.48	0.0196	9606.ENSP00000216336,9606.ENSP00000216341,9606.ENSP00000263341,9606.ENSP00000294413,9606.ENSP00000302100,9606.ENSP00000305529,9606.ENSP00000308782,9606.ENSP00000341141,9606.ENSP00000362108,9606.ENSP00000377284,9606.ENSP00000377508,9606.ENSP00000385675,9606.ENSP00000386380,9606.ENSP00000386559,9606.ENSP00000386884,9606.ENSP00000477908	CTSG,GZMB,IL1B,RHCE,LGALS4,SIRPG,GP6,SIGLEC1,LCN2,FOLR1,JUP,IL6,IL1R1,CD8A,CXCR4,CCL3
GO Process	GO:0009605	Response to external stimulus	39	2310	0.47	2.93e-06	9606.ENSP00000216336,9606.ENSP00000216341,9606.ENSP00000231751,9606.ENSP00000260356,9606.ENSP00000263341,9606.ENSP00000296435,9606.ENSP00000297991,9606.ENSP00000304408,9606.ENSP00000305416,9606.ENSP00000307305,9606.ENSP00000328359,9606.ENSP00000334329,9606.ENSP00000339398,9606.ENSP00000339587,9606.ENSP00000341610,9606.ENSP00000355437,9606.ENSP00000357022,9606.ENSP00000359532,9606.ENSP00000359787,…	CTSG,GZMB,LTF,THBS1,IL1B,CAMP,AQP3,COL3A1,S1PR1,DDIT4,DEFA3,UNC5B,HLA-DQA1,DFNA5,C15orf48,TRIM58,SLAMF7,NTSR1,IFI44L,LCN2,HLA-DQB1,AKR1C3,CD274,RSAD2,FOLR1,JUP,CCL8,IL6,CXCR4,HLA-DQB2,BCAR1,KIF5C,CSMD1,IDO1,FZD3,MRC1,CCL3,PRLR,IFI27
GO Process	GO:0002682	Regulation of immune system process	25	1514	0.46	0.0013	9606.ENSP00000215794,9606.ENSP00000216336,9606.ENSP00000231751,9606.ENSP00000241014,9606.ENSP00000260356,9606.ENSP00000262102,9606.ENSP00000263341,9606.ENSP00000297991,9606.ENSP00000301202,9606.ENSP00000304408,9606.ENSP00000305529,9606.ENSP00000339398,9606.ENSP00000355437,9606.ENSP00000357022,9606.ENSP00000364080,9606.ENSP00000370989,9606.ENSP00000371471,9606.ENSP00000378118,9606.ENSP00000385675,…	USP18,CTSG,LTF,MAPK8IP1,THBS1,MTUS1,IL1B,AQP3,LAIR2,COL3A1,SIRPG,HLA-DQA1,TRIM58,SLAMF7,HLA-DQB1,CD274,RSAD2,CCL8,IL6,IL1R1,CD8A,HLA-DQB2,BCAR1,IDO1,CCL3
GO Process	GO:1902533	Positive regulation of intracellular signal transduction	17	1041	0.46	0.027	9606.ENSP00000231751,9606.ENSP00000241014,9606.ENSP00000260356,9606.ENSP00000263341,9606.ENSP00000276077,9606.ENSP00000304408,9606.ENSP00000334329,9606.ENSP00000339587,9606.ENSP00000355437,9606.ENSP00000369927,9606.ENSP00000378118,9606.ENSP00000384848,9606.ENSP00000385675,9606.ENSP00000386884,9606.ENSP00000403954,9606.ENSP00000429240,9606.ENSP00000477908	LTF,MAPK8IP1,THBS1,IL1B,GPR174,COL3A1,UNC5B,DFNA5,TRIM58,AKR1C3,CCL8,PRR5,IL6,CXCR4,TENM1,ENSP00000429240,CCL3
GO Process	GO:0032940	Secretion by cell	16	979	0.46	0.0411	9606.ENSP00000216336,9606.ENSP00000231751,9606.ENSP00000260356,9606.ENSP00000272371,9606.ENSP00000295987,9606.ENSP00000296435,9606.ENSP00000309124,9606.ENSP00000355156,9606.ENSP00000355387,9606.ENSP00000362108,9606.ENSP00000377508,9606.ENSP00000378118,9606.ENSP00000378313,9606.ENSP00000385675,9606.ENSP00000447378,9606.ENSP00000477908	CTSG,LTF,THBS1,OTOF,SYN1,CAMP,OLR1,SUCNR1,SCAMP5,LCN2,JUP,CCL8,RAB3IL1,IL6,MGAM,CCL3
Reactome	HSA-168256	Immune System	32	1956	0.46	7.65e-05	9606.ENSP00000215794,9606.ENSP00000216223,9606.ENSP00000216336,9606.ENSP00000231751,9606.ENSP00000263341,9606.ENSP00000296435,9606.ENSP00000301202,9606.ENSP00000304408,9606.ENSP00000305416,9606.ENSP00000309124,9606.ENSP00000310686,9606.ENSP00000322788,9606.ENSP00000328359,9606.ENSP00000330959,9606.ENSP00000341141,9606.ENSP00000357022,9606.ENSP00000362108,9606.ENSP00000363976,9606.ENSP00000364080,…	USP18,IL2RB,CTSG,LTF,IL1B,CAMP,LAIR2,COL3A1,S1PR1,OLR1,FBXW8,MMP1,DEFA3,IL1R2,SIGLEC1,SLAMF7,LCN2,HLA-DMA,HLA-DQB1,CD274,RSAD2,JUP,PRR5,IL6,IL1R1,CD8A,HECTD2,MGAM,MRC1,CCL3,PRLR,IFI27
TISSUES	BTO:0000763	Lung	19	1162	0.46	0.0105	9606.ENSP00000231751,9606.ENSP00000260356,9606.ENSP00000262102,9606.ENSP00000263341,9606.ENSP00000297991,9606.ENSP00000304408,9606.ENSP00000305416,9606.ENSP00000309124,9606.ENSP00000322788,9606.ENSP00000339398,9606.ENSP00000355437,9606.ENSP00000369927,9606.ENSP00000370989,9606.ENSP00000372313,9606.ENSP00000377508,9606.ENSP00000385675,9606.ENSP00000386884,9606.ENSP00000391669,9606.ENSP00000430950	LTF,THBS1,MTUS1,IL1B,AQP3,COL3A1,S1PR1,OLR1,MMP1,HLA-DQA1,TRIM58,AKR1C3,CD274,MSLN,JUP,IL6,CXCR4,BCAR1,IDO1
GO Process	GO:0002376	Immune system process	39	2481	0.44	7.7e-06	9606.ENSP00000216336,9606.ENSP00000216341,9606.ENSP00000231751,9606.ENSP00000260356,9606.ENSP00000263341,9606.ENSP00000276077,9606.ENSP00000296435,9606.ENSP00000305416,9606.ENSP00000305529,9606.ENSP00000307305,9606.ENSP00000308782,9606.ENSP00000309124,9606.ENSP00000322788,9606.ENSP00000328359,9606.ENSP00000330959,9606.ENSP00000339398,9606.ENSP00000355156,9606.ENSP00000355437,9606.ENSP00000357022,…	CTSG,GZMB,LTF,THBS1,IL1B,GPR174,CAMP,S1PR1,SIRPG,DDIT4,GP6,OLR1,MMP1,DEFA3,IL1R2,HLA-DQA1,SUCNR1,TRIM58,SLAMF7,IFI44L,LCN2,HLA-DMA,HLA-DQB1,CD274,RSAD2,JUP,CCL8,IL6,IL1R1,CD8A,CXCR4,HLA-DQB2,BCAR1,TENM1,IDO1,MGAM,MRC1,CCL3,IFI27
GO Process	GO:0044419	Interspecies interaction between organisms	29	1899	0.43	0.00083	9606.ENSP00000216223,9606.ENSP00000216336,9606.ENSP00000216341,9606.ENSP00000231751,9606.ENSP00000263341,9606.ENSP00000296435,9606.ENSP00000307305,9606.ENSP00000322788,9606.ENSP00000328359,9606.ENSP00000339398,9606.ENSP00000339587,9606.ENSP00000341141,9606.ENSP00000341610,9606.ENSP00000355437,9606.ENSP00000357022,9606.ENSP00000359787,9606.ENSP00000362108,9606.ENSP00000364080,9606.ENSP00000370989,…	IL2RB,CTSG,GZMB,LTF,IL1B,CAMP,DDIT4,MMP1,DEFA3,HLA-DQA1,DFNA5,SIGLEC1,C15orf48,TRIM58,SLAMF7,IFI44L,LCN2,HLA-DQB1,CD274,RSAD2,CCL8,IL6,CXCR4,HLA-DQB2,IDO1,MRC1,CCL3,PRLR,IFI27
GO Process	GO:0046903	Secretion	17	1097	0.43	0.0453	9606.ENSP00000216336,9606.ENSP00000231751,9606.ENSP00000260356,9606.ENSP00000272371,9606.ENSP00000295987,9606.ENSP00000296435,9606.ENSP00000309124,9606.ENSP00000355156,9606.ENSP00000355387,9606.ENSP00000362108,9606.ENSP00000377508,9606.ENSP00000378118,9606.ENSP00000378313,9606.ENSP00000385675,9606.ENSP00000447378,9606.ENSP00000477908,9606.ENSP00000482954	CTSG,LTF,THBS1,OTOF,SYN1,CAMP,OLR1,SUCNR1,SCAMP5,LCN2,JUP,CCL8,RAB3IL1,IL6,MGAM,CCL3,PRLR
TISSUES	BTO:0000203	Respiratory system	22	1436	0.43	0.0105	9606.ENSP00000216223,9606.ENSP00000231751,9606.ENSP00000260356,9606.ENSP00000262102,9606.ENSP00000263341,9606.ENSP00000297991,9606.ENSP00000302100,9606.ENSP00000304408,9606.ENSP00000305416,9606.ENSP00000309124,9606.ENSP00000322788,9606.ENSP00000339398,9606.ENSP00000355437,9606.ENSP00000357022,9606.ENSP00000369927,9606.ENSP00000370989,9606.ENSP00000372313,9606.ENSP00000377508,9606.ENSP00000385675,…	IL2RB,LTF,THBS1,MTUS1,IL1B,AQP3,LGALS4,COL3A1,S1PR1,OLR1,MMP1,HLA-DQA1,TRIM58,SLAMF7,AKR1C3,CD274,MSLN,JUP,IL6,CXCR4,BCAR1,IDO1
UniProt Keywords	KW-0964	Secreted	28	1818	0.43	0.00018	9606.ENSP00000221399,9606.ENSP00000231751,9606.ENSP00000251582,9606.ENSP00000260356,9606.ENSP00000263341,9606.ENSP00000270328,9606.ENSP00000296435,9606.ENSP00000301202,9606.ENSP00000301455,9606.ENSP00000303766,9606.ENSP00000304408,9606.ENSP00000309124,9606.ENSP00000322788,9606.ENSP00000328359,9606.ENSP00000330959,9606.ENSP00000332511,9606.ENSP00000341141,9606.ENSP00000362108,9606.ENSP00000372313,…	TULP2,LTF,ADAMTS2,THBS1,IL1B,ADAMTS10,CAMP,LAIR2,ANGPTL4,HTRA3,COL3A1,OLR1,MMP1,DEFA3,IL1R2,OLFML1,SIGLEC1,LCN2,MSLN,PRB2,FOLR1,CCL8,IL6,IL1R1,CD8A,RNASE4,CCL3,PRLR
UniProt Keywords	KW-1015	Disulfide bond	50	3304	0.42	5.51e-09	9606.ENSP00000216223,9606.ENSP00000216336,9606.ENSP00000216341,9606.ENSP00000231751,9606.ENSP00000251582,9606.ENSP00000260356,9606.ENSP00000270328,9606.ENSP00000276077,9606.ENSP00000278550,9606.ENSP00000296435,9606.ENSP00000301202,9606.ENSP00000301455,9606.ENSP00000303766,9606.ENSP00000304408,9606.ENSP00000305416,9606.ENSP00000305529,9606.ENSP00000308782,9606.ENSP00000309124,9606.ENSP00000322788,…	IL2RB,CTSG,GZMB,LTF,ADAMTS2,THBS1,ADAMTS10,GPR174,TENM4,CAMP,LAIR2,ANGPTL4,HTRA3,COL3A1,S1PR1,SIRPG,GP6,OLR1,MMP1,OR6C2,DEFA3,IL1R2,OLFML1,UNC5B,HLA-DQA1,DFNA5,SIGLEC1,SUCNR1,SLAMF7,NTSR1,LCN2,HLA-DMA,HLA-DQB1,CD274,MSLN,FOLR1,CCL8,IL6,IL1R1,CD8A,CXCR4,HLA-DQB2,TENM1,CSMD1,FZD3,MGAM,RNASE4,MRC1,CCL3,PRLR
GO Process	GO:0048584	Positive regulation of response to stimulus	33	2257	0.41	0.0004	9606.ENSP00000216336,9606.ENSP00000216341,9606.ENSP00000231751,9606.ENSP00000241014,9606.ENSP00000257572,9606.ENSP00000260356,9606.ENSP00000263341,9606.ENSP00000276077,9606.ENSP00000304408,9606.ENSP00000305416,9606.ENSP00000334329,9606.ENSP00000339398,9606.ENSP00000339587,9606.ENSP00000355156,9606.ENSP00000355437,9606.ENSP00000359532,9606.ENSP00000364080,9606.ENSP00000369927,9606.ENSP00000370989,…	CTSG,GZMB,LTF,MAPK8IP1,HRK,THBS1,IL1B,GPR174,COL3A1,S1PR1,UNC5B,HLA-DQA1,DFNA5,SUCNR1,TRIM58,NTSR1,HLA-DQB1,AKR1C3,CD274,RSAD2,JUP,CCL8,PRR5,IL6,IL1R1,CXCR4,HLA-DQB2,BCAR1,TENM1,ENSP00000429240,IDO1,CCL3,PRLR
GO Process	GO:0009967	Positive regulation of signal transduction	24	1654	0.4	0.0109	9606.ENSP00000216341,9606.ENSP00000231751,9606.ENSP00000241014,9606.ENSP00000257572,9606.ENSP00000260356,9606.ENSP00000263341,9606.ENSP00000276077,9606.ENSP00000304408,9606.ENSP00000334329,9606.ENSP00000339587,9606.ENSP00000355437,9606.ENSP00000359532,9606.ENSP00000369927,9606.ENSP00000371471,9606.ENSP00000377508,9606.ENSP00000378118,9606.ENSP00000384848,9606.ENSP00000385675,9606.ENSP00000386380,…	GZMB,LTF,MAPK8IP1,HRK,THBS1,IL1B,GPR174,COL3A1,UNC5B,DFNA5,TRIM58,NTSR1,AKR1C3,RSAD2,JUP,CCL8,PRR5,IL6,IL1R1,CXCR4,TENM1,ENSP00000429240,CCL3,PRLR
COMPARTMENTS	GOCC:0005576	Extracellular region	29	2035	0.4	0.0022	9606.ENSP00000216336,9606.ENSP00000216341,9606.ENSP00000231751,9606.ENSP00000251582,9606.ENSP00000260356,9606.ENSP00000263341,9606.ENSP00000270328,9606.ENSP00000296435,9606.ENSP00000301202,9606.ENSP00000301455,9606.ENSP00000304408,9606.ENSP00000308782,9606.ENSP00000309124,9606.ENSP00000322788,9606.ENSP00000328359,9606.ENSP00000341141,9606.ENSP00000362108,9606.ENSP00000370989,9606.ENSP00000372313,…	CTSG,GZMB,LTF,ADAMTS2,THBS1,IL1B,ADAMTS10,CAMP,LAIR2,ANGPTL4,COL3A1,GP6,OLR1,MMP1,DEFA3,SIGLEC1,LCN2,CD274,MSLN,FOLR1,CCL8,SLC12A1,IL6,CD8A,CXCR4,MGAM,RNASE4,CCL3,PRLR
GO Process	GO:0051240	Positive regulation of multicellular organismal process	25	1770	0.39	0.0109	9606.ENSP00000231751,9606.ENSP00000260356,9606.ENSP00000263341,9606.ENSP00000278550,9606.ENSP00000296435,9606.ENSP00000301455,9606.ENSP00000309714,9606.ENSP00000310686,9606.ENSP00000354498,9606.ENSP00000355387,9606.ENSP00000355437,9606.ENSP00000359532,9606.ENSP00000362108,9606.ENSP00000370989,9606.ENSP00000371471,9606.ENSP00000377508,9606.ENSP00000385675,9606.ENSP00000386380,9606.ENSP00000386884,…	LTF,THBS1,IL1B,TENM4,CAMP,ANGPTL4,SH3PXD2B,FBXW8,PHLDB1,SCAMP5,TRIM58,NTSR1,LCN2,CD274,RSAD2,JUP,IL6,IL1R1,CXCR4,BCAR1,IDO1,SMTNL1,FZD3,CCL3,PRLR
COMPARTMENTS	GOCC:0031410	Cytoplasmic vesicle	24	1709	0.39	0.0089	9606.ENSP00000216336,9606.ENSP00000231751,9606.ENSP00000246070,9606.ENSP00000260356,9606.ENSP00000272371,9606.ENSP00000295987,9606.ENSP00000296435,9606.ENSP00000305416,9606.ENSP00000309124,9606.ENSP00000328359,9606.ENSP00000339398,9606.ENSP00000355387,9606.ENSP00000362108,9606.ENSP00000363976,9606.ENSP00000364080,9606.ENSP00000370989,9606.ENSP00000377284,9606.ENSP00000377508,9606.ENSP00000378313,…	CTSG,LTF,LAMP5,THBS1,OTOF,SYN1,CAMP,S1PR1,OLR1,DEFA3,HLA-DQA1,SCAMP5,LCN2,HLA-DMA,HLA-DQB1,CD274,FOLR1,JUP,RAB3IL1,CXCR4,HLA-DQB2,MGAM,MRC1,PRLR
GO Process	GO:0010647	Positive regulation of cell communication	25	1823	0.38	0.0135	9606.ENSP00000216341,9606.ENSP00000231751,9606.ENSP00000241014,9606.ENSP00000257572,9606.ENSP00000260356,9606.ENSP00000263341,9606.ENSP00000276077,9606.ENSP00000304408,9606.ENSP00000334329,9606.ENSP00000339587,9606.ENSP00000355387,9606.ENSP00000355437,9606.ENSP00000359532,9606.ENSP00000369927,9606.ENSP00000371471,9606.ENSP00000377508,9606.ENSP00000378118,9606.ENSP00000384848,9606.ENSP00000385675,…	GZMB,LTF,MAPK8IP1,HRK,THBS1,IL1B,GPR174,COL3A1,UNC5B,DFNA5,SCAMP5,TRIM58,NTSR1,AKR1C3,RSAD2,JUP,CCL8,PRR5,IL6,IL1R1,CXCR4,TENM1,ENSP00000429240,CCL3,PRLR
GO Process	GO:0023056	Positive regulation of signaling	25	1831	0.38	0.014	9606.ENSP00000216341,9606.ENSP00000231751,9606.ENSP00000241014,9606.ENSP00000257572,9606.ENSP00000260356,9606.ENSP00000263341,9606.ENSP00000276077,9606.ENSP00000304408,9606.ENSP00000334329,9606.ENSP00000339587,9606.ENSP00000355387,9606.ENSP00000355437,9606.ENSP00000359532,9606.ENSP00000369927,9606.ENSP00000371471,9606.ENSP00000377508,9606.ENSP00000378118,9606.ENSP00000384848,9606.ENSP00000385675,…	GZMB,LTF,MAPK8IP1,HRK,THBS1,IL1B,GPR174,COL3A1,UNC5B,DFNA5,SCAMP5,TRIM58,NTSR1,AKR1C3,RSAD2,JUP,CCL8,PRR5,IL6,IL1R1,CXCR4,TENM1,ENSP00000429240,CCL3,PRLR
UniProt Keywords	KW-0732	Signal	44	3233	0.38	2.98e-06	9606.ENSP00000216223,9606.ENSP00000216336,9606.ENSP00000216341,9606.ENSP00000231751,9606.ENSP00000246070,9606.ENSP00000251582,9606.ENSP00000257632,9606.ENSP00000260356,9606.ENSP00000270328,9606.ENSP00000296435,9606.ENSP00000301202,9606.ENSP00000301455,9606.ENSP00000303766,9606.ENSP00000304408,9606.ENSP00000305529,9606.ENSP00000308782,9606.ENSP00000322788,9606.ENSP00000328359,9606.ENSP00000330959,…	IL2RB,CTSG,GZMB,LTF,LAMP5,ADAMTS2,UPK3B,THBS1,ADAMTS10,CAMP,LAIR2,ANGPTL4,HTRA3,COL3A1,SIRPG,GP6,MMP1,DEFA3,IL1R2,OLFML1,UNC5B,HLA-DQA1,SIGLEC1,SLAMF7,LCN2,HLA-DMA,HLA-DQB1,CD274,MSLN,PRB2,FOLR1,CCL8,IL6,IL1R1,CD8A,HLA-DQB2,RNF150,CSMD1,FZD3,RNASE4,MRC1,CCL3,FCGBP,PRLR
COMPARTMENTS	GOCC:0071944	Cell periphery	49	3688	0.37	3.62e-06	9606.ENSP00000216223,9606.ENSP00000216336,9606.ENSP00000216341,9606.ENSP00000216446,9606.ENSP00000222115,9606.ENSP00000246070,9606.ENSP00000257632,9606.ENSP00000260356,9606.ENSP00000263341,9606.ENSP00000272371,9606.ENSP00000276077,9606.ENSP00000278550,9606.ENSP00000294413,9606.ENSP00000297991,9606.ENSP00000302100,9606.ENSP00000305416,9606.ENSP00000308782,9606.ENSP00000309124,9606.ENSP00000309714,…	IL2RB,CTSG,GZMB,PLEK2,HAS1,LAMP5,UPK3B,THBS1,IL1B,OTOF,GPR174,TENM4,RHCE,AQP3,LGALS4,S1PR1,GP6,OLR1,SH3PXD2B,OR6C2,IL1R2,HLA-DQA1,DFNA5,SIGLEC1,PHLDB1,SUCNR1,SCAMP5,SLAMF7,OOEP,NTSR1,HLA-DMA,HLA-DQB1,CD274,MSLN,FOLR1,JUP,PGM5,SLC12A1,IL6,IL1R1,CD8A,CXCR4,HLA-DQB2,TENM1,IDO1,FZD3,MGAM,MRC1,PRLR
UniProt Keywords	KW-0675	Receptor	19	1422	0.37	0.046	9606.ENSP00000216223,9606.ENSP00000276077,9606.ENSP00000301202,9606.ENSP00000305416,9606.ENSP00000308782,9606.ENSP00000309124,9606.ENSP00000323606,9606.ENSP00000330959,9606.ENSP00000334329,9606.ENSP00000355156,9606.ENSP00000357022,9606.ENSP00000359532,9606.ENSP00000370989,9606.ENSP00000377284,9606.ENSP00000386380,9606.ENSP00000386884,9606.ENSP00000437489,9606.ENSP00000455897,9606.ENSP00000482954	IL2RB,GPR174,LAIR2,S1PR1,GP6,OLR1,OR6C2,IL1R2,UNC5B,SUCNR1,SLAMF7,NTSR1,CD274,FOLR1,IL1R1,CXCR4,FZD3,MRC1,PRLR
GO Process	GO:0071310	Cellular response to organic substance	31	2369	0.36	0.0059	9606.ENSP00000216223,9606.ENSP00000216336,9606.ENSP00000222115,9606.ENSP00000260356,9606.ENSP00000263341,9606.ENSP00000304408,9606.ENSP00000305416,9606.ENSP00000307305,9606.ENSP00000322788,9606.ENSP00000328359,9606.ENSP00000330959,9606.ENSP00000339398,9606.ENSP00000339587,9606.ENSP00000362108,9606.ENSP00000364080,9606.ENSP00000369927,9606.ENSP00000370989,9606.ENSP00000371471,9606.ENSP00000377284,…	IL2RB,CTSG,HAS1,THBS1,IL1B,COL3A1,S1PR1,DDIT4,MMP1,DEFA3,IL1R2,HLA-DQA1,DFNA5,LCN2,HLA-DQB1,AKR1C3,CD274,RSAD2,FOLR1,JUP,CCL8,IL6,IL1R1,CXCR4,HLA-DQB2,BCAR1,EFHC2,MRC1,CCL3,PRLR,IFI27
TISSUES	BTO:0000089	Blood	22	1675	0.36	0.0385	9606.ENSP00000216336,9606.ENSP00000216341,9606.ENSP00000231751,9606.ENSP00000260356,9606.ENSP00000263341,9606.ENSP00000294413,9606.ENSP00000302100,9606.ENSP00000305529,9606.ENSP00000308782,9606.ENSP00000339398,9606.ENSP00000341141,9606.ENSP00000355156,9606.ENSP00000362108,9606.ENSP00000364080,9606.ENSP00000377284,9606.ENSP00000377508,9606.ENSP00000385675,9606.ENSP00000386380,9606.ENSP00000386559,…	CTSG,GZMB,LTF,THBS1,IL1B,RHCE,LGALS4,SIRPG,GP6,HLA-DQA1,SIGLEC1,SUCNR1,LCN2,HLA-DQB1,FOLR1,JUP,IL6,IL1R1,CD8A,CXCR4,IDO1,CCL3
COMPARTMENTS	GOCC:0005886	Plasma membrane	46	3531	0.36	1.52e-05	9606.ENSP00000216223,9606.ENSP00000216336,9606.ENSP00000216341,9606.ENSP00000216446,9606.ENSP00000222115,9606.ENSP00000246070,9606.ENSP00000257632,9606.ENSP00000260356,9606.ENSP00000263341,9606.ENSP00000272371,9606.ENSP00000276077,9606.ENSP00000278550,9606.ENSP00000294413,9606.ENSP00000297991,9606.ENSP00000302100,9606.ENSP00000305416,9606.ENSP00000308782,9606.ENSP00000309124,9606.ENSP00000309714,…	IL2RB,CTSG,GZMB,PLEK2,HAS1,LAMP5,UPK3B,THBS1,IL1B,OTOF,GPR174,TENM4,RHCE,AQP3,LGALS4,S1PR1,GP6,OLR1,SH3PXD2B,OR6C2,IL1R2,HLA-DQA1,DFNA5,SIGLEC1,SUCNR1,SCAMP5,SLAMF7,NTSR1,HLA-DMA,HLA-DQB1,CD274,MSLN,FOLR1,JUP,PGM5,SLC12A1,IL6,IL1R1,CD8A,CXCR4,HLA-DQB2,TENM1,FZD3,MGAM,MRC1,PRLR
COMPARTMENTS	GOCC:0031982	Vesicle	26	2051	0.35	0.0162	9606.ENSP00000216336,9606.ENSP00000231751,9606.ENSP00000246070,9606.ENSP00000260356,9606.ENSP00000272371,9606.ENSP00000295987,9606.ENSP00000296435,9606.ENSP00000305416,9606.ENSP00000308782,9606.ENSP00000309124,9606.ENSP00000328359,9606.ENSP00000339398,9606.ENSP00000355387,9606.ENSP00000362108,9606.ENSP00000363976,9606.ENSP00000364080,9606.ENSP00000370989,9606.ENSP00000377284,9606.ENSP00000377508,…	CTSG,LTF,LAMP5,THBS1,OTOF,SYN1,CAMP,S1PR1,GP6,OLR1,DEFA3,HLA-DQA1,SCAMP5,LCN2,HLA-DMA,HLA-DQB1,CD274,FOLR1,JUP,RAB3IL1,SLC12A1,CXCR4,HLA-DQB2,MGAM,MRC1,PRLR
GO Component	GO:0031410	Cytoplasmic vesicle	28	2386	0.31	0.0302	9606.ENSP00000216223,9606.ENSP00000216336,9606.ENSP00000231751,9606.ENSP00000246070,9606.ENSP00000260356,9606.ENSP00000263341,9606.ENSP00000272371,9606.ENSP00000293970,9606.ENSP00000295987,9606.ENSP00000296435,9606.ENSP00000305416,9606.ENSP00000309124,9606.ENSP00000328359,9606.ENSP00000339398,9606.ENSP00000341141,9606.ENSP00000355387,9606.ENSP00000362108,9606.ENSP00000363976,9606.ENSP00000364080,…	IL2RB,CTSG,LTF,LAMP5,THBS1,IL1B,OTOF,TBC1D24,SYN1,CAMP,S1PR1,OLR1,DEFA3,HLA-DQA1,SIGLEC1,SCAMP5,LCN2,HLA-DMA,HLA-DQB1,CD274,FOLR1,JUP,RAB3IL1,CXCR4,HLA-DQB2,MGAM,MRC1,PRLR
GO Process	GO:0010033	Response to organic substance	34	3011	0.3	0.0187	9606.ENSP00000216223,9606.ENSP00000216336,9606.ENSP00000222115,9606.ENSP00000260356,9606.ENSP00000263341,9606.ENSP00000297991,9606.ENSP00000304408,9606.ENSP00000305416,9606.ENSP00000307305,9606.ENSP00000322788,9606.ENSP00000328359,9606.ENSP00000330959,9606.ENSP00000339398,9606.ENSP00000339587,9606.ENSP00000359532,9606.ENSP00000362108,9606.ENSP00000364080,9606.ENSP00000369927,9606.ENSP00000370989,…	IL2RB,CTSG,HAS1,THBS1,IL1B,AQP3,COL3A1,S1PR1,DDIT4,MMP1,DEFA3,IL1R2,HLA-DQA1,DFNA5,NTSR1,LCN2,HLA-DQB1,AKR1C3,CD274,RSAD2,FOLR1,JUP,CCL8,IL6,IL1R1,CXCR4,HLA-DQB2,BCAR1,EFHC2,IDO1,MRC1,CCL3,PRLR,IFI27
GO Process	GO:0070887	Cellular response to chemical stimulus	33	2919	0.3	0.0217	9606.ENSP00000216223,9606.ENSP00000216336,9606.ENSP00000222115,9606.ENSP00000260356,9606.ENSP00000263341,9606.ENSP00000293970,9606.ENSP00000297991,9606.ENSP00000304408,9606.ENSP00000305416,9606.ENSP00000307305,9606.ENSP00000322788,9606.ENSP00000328359,9606.ENSP00000330959,9606.ENSP00000339398,9606.ENSP00000339587,9606.ENSP00000362108,9606.ENSP00000364080,9606.ENSP00000369927,9606.ENSP00000370989,…	IL2RB,CTSG,HAS1,THBS1,IL1B,TBC1D24,AQP3,COL3A1,S1PR1,DDIT4,MMP1,DEFA3,IL1R2,HLA-DQA1,DFNA5,LCN2,HLA-DQB1,AKR1C3,CD274,RSAD2,FOLR1,JUP,CCL8,IL6,IL1R1,CXCR4,HLA-DQB2,BCAR1,EFHC2,MRC1,CCL3,PRLR,IFI27
UniProt Keywords	KW-0325	Glycoprotein	49	4349	0.29	8.22e-05	9606.ENSP00000216223,9606.ENSP00000216336,9606.ENSP00000216341,9606.ENSP00000231751,9606.ENSP00000246070,9606.ENSP00000251582,9606.ENSP00000257632,9606.ENSP00000260356,9606.ENSP00000270328,9606.ENSP00000276077,9606.ENSP00000278550,9606.ENSP00000295987,9606.ENSP00000297991,9606.ENSP00000301455,9606.ENSP00000304408,9606.ENSP00000305416,9606.ENSP00000305529,9606.ENSP00000308782,9606.ENSP00000309124,…	IL2RB,CTSG,GZMB,LTF,LAMP5,ADAMTS2,UPK3B,THBS1,ADAMTS10,GPR174,TENM4,SYN1,AQP3,ANGPTL4,COL3A1,S1PR1,SIRPG,GP6,OLR1,MMP1,OR6C2,IL1R2,OLFML1,UNC5B,SIGLEC1,SUCNR1,SLAMF7,NTSR1,LCN2,HLA-DMA,HLA-DQB1,CD274,MSLN,PRB2,FOLR1,JUP,SLC12A1,IL6,IL1R1,CD8A,CXCR4,TENM1,RNF150,CSMD1,FZD3,TMTC1,MGAM,MRC1,PRLR
GO Process	GO:0048583	Regulation of response to stimulus	44	4114	0.27	0.0068	9606.ENSP00000215794,9606.ENSP00000216336,9606.ENSP00000216341,9606.ENSP00000228843,9606.ENSP00000231751,9606.ENSP00000241014,9606.ENSP00000257572,9606.ENSP00000260356,9606.ENSP00000262102,9606.ENSP00000263341,9606.ENSP00000276077,9606.ENSP00000301202,9606.ENSP00000303766,9606.ENSP00000304408,9606.ENSP00000305416,9606.ENSP00000307305,9606.ENSP00000330959,9606.ENSP00000334329,9606.ENSP00000339398,…	USP18,CTSG,GZMB,RAD51AP1,LTF,MAPK8IP1,HRK,THBS1,MTUS1,IL1B,GPR174,LAIR2,HTRA3,COL3A1,S1PR1,DDIT4,IL1R2,UNC5B,HLA-DQA1,DFNA5,SUCNR1,TRIM58,SLAMF7,NTSR1,HLA-DQB1,AKR1C3,CD274,RSAD2,FOLR1,JUP,CCL8,PRR5,IL6,IL1R1,CD8A,CXCR4,HLA-DQB2,BCAR1,TENM1,AFAP1,ENSP00000429240,IDO1,CCL3,PRLR
GO Process	GO:0006950	Response to stress	37	3485	0.27	0.0238	9606.ENSP00000166345,9606.ENSP00000216336,9606.ENSP00000216341,9606.ENSP00000228843,9606.ENSP00000231751,9606.ENSP00000241014,9606.ENSP00000260356,9606.ENSP00000263341,9606.ENSP00000293970,9606.ENSP00000296435,9606.ENSP00000297991,9606.ENSP00000301455,9606.ENSP00000304408,9606.ENSP00000307305,9606.ENSP00000308782,9606.ENSP00000309124,9606.ENSP00000328359,9606.ENSP00000339398,9606.ENSP00000341141,…	TRIP13,CTSG,GZMB,RAD51AP1,LTF,MAPK8IP1,THBS1,IL1B,TBC1D24,CAMP,AQP3,ANGPTL4,COL3A1,DDIT4,GP6,OLR1,DEFA3,HLA-DQA1,SIGLEC1,SCAMP5,TRIM58,SLAMF7,IFI44L,LCN2,HLA-DQB1,AKR1C3,RSAD2,FOLR1,CCL8,IL6,IL1R1,CXCR4,HLA-DQB2,IDO1,MRC1,CCL3,IFI27
COMPARTMENTS	GOCC:0012505	Endomembrane system	32	3080	0.26	0.0486	9606.ENSP00000216336,9606.ENSP00000231751,9606.ENSP00000241014,9606.ENSP00000246070,9606.ENSP00000260356,9606.ENSP00000272371,9606.ENSP00000295987,9606.ENSP00000296435,9606.ENSP00000304408,9606.ENSP00000305416,9606.ENSP00000309124,9606.ENSP00000310686,9606.ENSP00000328359,9606.ENSP00000339398,9606.ENSP00000355387,9606.ENSP00000362108,9606.ENSP00000363976,9606.ENSP00000364080,9606.ENSP00000370989,…	CTSG,LTF,MAPK8IP1,LAMP5,THBS1,OTOF,SYN1,CAMP,COL3A1,S1PR1,OLR1,FBXW8,DEFA3,HLA-DQA1,SCAMP5,LCN2,HLA-DMA,HLA-DQB1,CD274,RSAD2,MSLN,FOLR1,JUP,RAB3IL1,RGPD2,IL6,CXCR4,HLA-DQB2,MGAM,MRC1,PRLR,IFI27
GO Component	GO:0005576	Extracellular region	41	4166	0.24	0.0302	9606.ENSP00000216336,9606.ENSP00000221399,9606.ENSP00000231751,9606.ENSP00000251582,9606.ENSP00000260356,9606.ENSP00000262102,9606.ENSP00000263341,9606.ENSP00000270328,9606.ENSP00000296435,9606.ENSP00000301202,9606.ENSP00000301455,9606.ENSP00000302100,9606.ENSP00000303766,9606.ENSP00000304408,9606.ENSP00000308782,9606.ENSP00000309124,9606.ENSP00000322788,9606.ENSP00000328359,9606.ENSP00000330959,…	CTSG,TULP2,LTF,ADAMTS2,THBS1,MTUS1,IL1B,ADAMTS10,CAMP,LAIR2,ANGPTL4,LGALS4,HTRA3,COL3A1,GP6,OLR1,MMP1,DEFA3,IL1R2,OLFML1,SIGLEC1,SUCNR1,LCN2,AKR1C3,CD274,MSLN,PRB2,FOLR1,JUP,CCL8,SLC12A1,IL6,IL1R1,CD8A,CXCR4,TENM1,MGAM,RNASE4,CCL3,FCGBP,PRLR
GO Component	GO:0071944	Cell periphery	51	5432	0.21	0.0134	9606.ENSP00000216223,9606.ENSP00000216336,9606.ENSP00000216341,9606.ENSP00000216446,9606.ENSP00000222115,9606.ENSP00000241014,9606.ENSP00000246070,9606.ENSP00000257632,9606.ENSP00000260356,9606.ENSP00000262102,9606.ENSP00000272371,9606.ENSP00000276077,9606.ENSP00000278550,9606.ENSP00000293970,9606.ENSP00000294413,9606.ENSP00000297991,9606.ENSP00000302100,9606.ENSP00000305416,9606.ENSP00000305529,…	IL2RB,CTSG,GZMB,PLEK2,HAS1,MAPK8IP1,LAMP5,UPK3B,THBS1,MTUS1,OTOF,GPR174,TENM4,TBC1D24,RHCE,AQP3,LGALS4,S1PR1,SIRPG,GP6,OLR1,OR6C2,IL1R2,UNC5B,HLA-DQA1,DFNA5,SIGLEC1,PHLDB1,SUCNR1,SCAMP5,SLAMF7,OOEP,NTSR1,HLA-DMA,HLA-DQB1,CD274,MSLN,FOLR1,JUP,PGM5,SLC12A1,IL6,IL1R1,CD8A,CXCR4,HLA-DQB2,TENM1,FZD3,MGAM,MRC1,PRLR
GO Component	GO:0005886	Plasma membrane	49	5314	0.21	0.03	9606.ENSP00000216223,9606.ENSP00000216336,9606.ENSP00000216341,9606.ENSP00000216446,9606.ENSP00000222115,9606.ENSP00000241014,9606.ENSP00000246070,9606.ENSP00000257632,9606.ENSP00000260356,9606.ENSP00000262102,9606.ENSP00000272371,9606.ENSP00000276077,9606.ENSP00000278550,9606.ENSP00000293970,9606.ENSP00000294413,9606.ENSP00000297991,9606.ENSP00000302100,9606.ENSP00000305416,9606.ENSP00000305529,…	IL2RB,CTSG,GZMB,PLEK2,HAS1,MAPK8IP1,LAMP5,UPK3B,THBS1,MTUS1,OTOF,GPR174,TENM4,TBC1D24,RHCE,AQP3,LGALS4,S1PR1,SIRPG,GP6,OLR1,OR6C2,IL1R2,UNC5B,HLA-DQA1,DFNA5,SIGLEC1,SUCNR1,SCAMP5,SLAMF7,NTSR1,HLA-DMA,HLA-DQB1,CD274,MSLN,FOLR1,JUP,PGM5,SLC12A1,IL6,IL1R1,CD8A,CXCR4,HLA-DQB2,TENM1,FZD3,MGAM,MRC1,PRLR
COMPARTMENTS	GOCC:0016020	Membrane	53	5657	0.21	0.0089	9606.ENSP00000216223,9606.ENSP00000216336,9606.ENSP00000216341,9606.ENSP00000216446,9606.ENSP00000222115,9606.ENSP00000241014,9606.ENSP00000246070,9606.ENSP00000257572,9606.ENSP00000257632,9606.ENSP00000260356,9606.ENSP00000263341,9606.ENSP00000272371,9606.ENSP00000276077,9606.ENSP00000278550,9606.ENSP00000294413,9606.ENSP00000295987,9606.ENSP00000297991,9606.ENSP00000302100,9606.ENSP00000305416,…	IL2RB,CTSG,GZMB,PLEK2,HAS1,MAPK8IP1,LAMP5,HRK,UPK3B,THBS1,IL1B,OTOF,GPR174,TENM4,RHCE,SYN1,AQP3,LGALS4,S1PR1,SIRPG,GP6,OLR1,SH3PXD2B,OR6C2,IL1R2,HLA-DQA1,DFNA5,SIGLEC1,C15orf48,SUCNR1,SCAMP5,SLAMF7,NTSR1,HLA-DMA,HLA-DQB1,CD274,RSAD2,MSLN,FOLR1,JUP,PGM5,SLC12A1,IL6,IL1R1,CD8A,CXCR4,HLA-DQB2,TENM1,FZD3,MGAM,MRC1,PRLR,IFI27
GO Process	GO:0050896	Response to stimulus	67	8046	0.16	0.0187	9606.ENSP00000166345,9606.ENSP00000216223,9606.ENSP00000216336,9606.ENSP00000216341,9606.ENSP00000216446,9606.ENSP00000222115,9606.ENSP00000228843,9606.ENSP00000231751,9606.ENSP00000241014,9606.ENSP00000260356,9606.ENSP00000263341,9606.ENSP00000276077,9606.ENSP00000278550,9606.ENSP00000293970,9606.ENSP00000296435,9606.ENSP00000297991,9606.ENSP00000301455,9606.ENSP00000304408,9606.ENSP00000305416,…	TRIP13,IL2RB,CTSG,GZMB,PLEK2,HAS1,RAD51AP1,LTF,MAPK8IP1,THBS1,IL1B,GPR174,TENM4,TBC1D24,CAMP,AQP3,ANGPTL4,COL3A1,S1PR1,SIRPG,DDIT4,GP6,OLR1,MMP1,OR6C2,DEFA3,IL1R2,UNC5B,HLA-DQA1,DFNA5,SIGLEC1,C15orf48,SUCNR1,SCAMP5,TRIM58,SLAMF7,NTSR1,IFI44L,LCN2,HLA-DMA,HLA-DQB1,AKR1C3,CD274,RSAD2,FOLR1,JUP,CCL8,PRR5,IL6,IL1R1,CD8A,CXCR4,HLA-DQB2,BCAR1,KIF5C,TENM1,EFHC2,ENSP00000429240,CSMD1,IDO1,SMTNL1,FZD3,MGA…

## Sheet: Eosinophil_Enrichment_All
#category	term ID	term description	observed gene count	background gene count	strength	false discovery rate	matching proteins in your network (IDs)	matching proteins in your network (labels)
STRING clusters	CL:18277	Chemokine receptors bind chemokines	5	20	1.43	0.00098	9606.ENSP00000225831,9606.ENSP00000295683,9606.ENSP00000306512,9606.ENSP00000477908,9606.ENSP00000480558	CCL2,CXCR1,CXCL8,CCL3,CCL3L3
STRING clusters	CL:18278	CC chemokine, conserved site, and chemokine (C-C motif) ligand 7 binding	3	11	1.47	0.0485	9606.ENSP00000225831,9606.ENSP00000477908,9606.ENSP00000480558	CCL2,CCL3,CCL3L3
STRING clusters	CL:18982	Mixed, incl. histiocytosis, and hematopoietic cell lineage	6	35	1.27	0.00071	9606.ENSP00000252593,9606.ENSP00000265598,9606.ENSP00000269389,9606.ENSP00000312027,9606.ENSP00000418525,9606.ENSP00000440428	BST2,LAMP3,SECTM1,CD7,MME,CLEC4C
STRING clusters	CL:19382	Mixed, incl. interferon alpha/beta signaling, and negative regulators of ddx58/ifih1 signaling	29	67	1.67	6.45e-33	9606.ENSP00000215794,9606.ENSP00000228928,9606.ENSP00000251642,9606.ENSP00000257570,9606.ENSP00000259030,9606.ENSP00000263642,9606.ENSP00000264346,9606.ENSP00000264350,9606.ENSP00000306565,9606.ENSP00000318982,9606.ENSP00000333657,9606.ENSP00000342278,9606.ENSP00000342513,9606.ENSP00000354822,9606.ENSP00000359488,9606.ENSP00000359490,9606.ENSP00000359497,9606.ENSP00000359504,9606.ENSP00000359512,…	USP18,OAS3,DHX58,OASL,RTP4,IFIH1,HERC6,HERC5,ISG20,EPSTI1,MX2,OAS2,IFI6,XAF1,GBP5,GBP4,GBP2,GBP1,GBP3,IFI44,IFI44L,IFIT5,ISG15,RSAD2,DDX60,IRF7,MX1,OAS1,IFI27
STRING clusters	CL:19385	Interferon alpha/beta signaling, and Negative regulators of DDX58/IFIH1 signaling	28	61	1.7	1.5e-32	9606.ENSP00000215794,9606.ENSP00000228928,9606.ENSP00000251642,9606.ENSP00000257570,9606.ENSP00000259030,9606.ENSP00000263642,9606.ENSP00000264346,9606.ENSP00000264350,9606.ENSP00000306565,9606.ENSP00000318982,9606.ENSP00000333657,9606.ENSP00000342278,9606.ENSP00000342513,9606.ENSP00000354822,9606.ENSP00000359490,9606.ENSP00000359497,9606.ENSP00000359504,9606.ENSP00000359512,9606.ENSP00000359783,…	USP18,OAS3,DHX58,OASL,RTP4,IFIH1,HERC6,HERC5,ISG20,EPSTI1,MX2,OAS2,IFI6,XAF1,GBP4,GBP2,GBP1,GBP3,IFI44,IFI44L,IFIT5,ISG15,RSAD2,DDX60,IRF7,MX1,OAS1,IFI27
STRING clusters	CL:19391	Interferon alpha/beta signaling, and ISG15-protein conjugation	24	36	1.86	6.32e-31	9606.ENSP00000215794,9606.ENSP00000228928,9606.ENSP00000251642,9606.ENSP00000257570,9606.ENSP00000259030,9606.ENSP00000264346,9606.ENSP00000264350,9606.ENSP00000306565,9606.ENSP00000333657,9606.ENSP00000342278,9606.ENSP00000342513,9606.ENSP00000354822,9606.ENSP00000359497,9606.ENSP00000359504,9606.ENSP00000359783,9606.ENSP00000359787,9606.ENSP00000360860,9606.ENSP00000368699,9606.ENSP00000371471,…	USP18,OAS3,DHX58,OASL,RTP4,HERC6,HERC5,ISG20,MX2,OAS2,IFI6,XAF1,GBP2,GBP1,IFI44,IFI44L,IFIT5,ISG15,RSAD2,DDX60,IRF7,MX1,OAS1,IFI27
STRING clusters	CL:19394	Interferon alpha/beta signaling	14	21	1.86	2.26e-17	9606.ENSP00000228928,9606.ENSP00000257570,9606.ENSP00000306565,9606.ENSP00000333657,9606.ENSP00000342278,9606.ENSP00000342513,9606.ENSP00000354822,9606.ENSP00000359497,9606.ENSP00000360860,9606.ENSP00000371471,9606.ENSP00000380697,9606.ENSP00000381601,9606.ENSP00000388001,9606.ENSP00000483430	OAS3,OASL,ISG20,MX2,OAS2,IFI6,XAF1,GBP2,IFIT5,RSAD2,IRF7,MX1,OAS1,IFI27
STRING clusters	CL:19397	Microphthalmia with limb anomalies, and Interferon alpha/beta signaling	12	16	1.91	3.7e-15	9606.ENSP00000228928,9606.ENSP00000257570,9606.ENSP00000306565,9606.ENSP00000333657,9606.ENSP00000342278,9606.ENSP00000342513,9606.ENSP00000354822,9606.ENSP00000360860,9606.ENSP00000371471,9606.ENSP00000380697,9606.ENSP00000381601,9606.ENSP00000388001	OAS3,OASL,ISG20,MX2,OAS2,IFI6,XAF1,IFIT5,RSAD2,IRF7,MX1,OAS1
STRING clusters	CL:19399	Mixed, incl. 2-5-oligoadenylate synthetase activity, and nephropathia epidemica	7	11	1.84	6.43e-08	9606.ENSP00000228928,9606.ENSP00000333657,9606.ENSP00000342278,9606.ENSP00000342513,9606.ENSP00000354822,9606.ENSP00000371471,9606.ENSP00000388001	OAS3,MX2,OAS2,IFI6,XAF1,RSAD2,OAS1
STRING clusters	CL:19437	Mixed, incl. isg15-protein conjugation, and interferon-induced protein 44 family	10	13	1.92	1.7e-12	9606.ENSP00000215794,9606.ENSP00000251642,9606.ENSP00000259030,9606.ENSP00000264346,9606.ENSP00000264350,9606.ENSP00000359504,9606.ENSP00000359783,9606.ENSP00000359787,9606.ENSP00000368699,9606.ENSP00000377344	USP18,DHX58,RTP4,HERC6,HERC5,GBP1,IFI44,IFI44L,ISG15,DDX60
DISEASES	DOID:0050828	Artery disease	7	118	0.81	0.0424	9606.ENSP00000200676,9606.ENSP00000225831,9606.ENSP00000252486,9606.ENSP00000268150,9606.ENSP00000306512,9606.ENSP00000361405,9606.ENSP00000371471	CETP,CCL2,APOE,MFGE8,CXCL8,MMP9,RSAD2
STRING clusters	CL:19438	Mixed, incl. interferon-induced protein 44 family, and receptor-transporting protein 4	6	7	1.97	3.67e-07	9606.ENSP00000259030,9606.ENSP00000264346,9606.ENSP00000359504,9606.ENSP00000359783,9606.ENSP00000359787,9606.ENSP00000377344	RTP4,HERC6,GBP1,IFI44,IFI44L,DDX60
DISEASES	DOID:417	Autoimmune disease	12	294	0.64	0.0131	9606.ENSP00000225831,9606.ENSP00000259206,9606.ENSP00000263642,9606.ENSP00000279873,9606.ENSP00000339398,9606.ENSP00000351497,9606.ENSP00000353099,9606.ENSP00000364080,9606.ENSP00000364597,9606.ENSP00000388001,9606.ENSP00000388402,9606.ENSP00000412927	CCL2,IL1RN,IFIH1,ARID5B,HLA-DQA1,FCGR2B,HLA-DRB1,HLA-DQB1,PADI4,OAS1,ZFP36L1,HLA-G
DISEASES	DOID:0060032	Autoimmune disease of musculoskeletal system	11	170	0.84	0.0014	9606.ENSP00000225831,9606.ENSP00000259206,9606.ENSP00000263642,9606.ENSP00000279873,9606.ENSP00000339398,9606.ENSP00000351497,9606.ENSP00000353099,9606.ENSP00000364080,9606.ENSP00000364597,9606.ENSP00000388402,9606.ENSP00000412927	CCL2,IL1RN,IFIH1,ARID5B,HLA-DQA1,FCGR2B,HLA-DRB1,HLA-DQB1,PADI4,ZFP36L1,HLA-G
TISSUES	BTO:0000089	Blood	33	1675	0.33	0.0202	9606.ENSP00000225831,9606.ENSP00000228928,9606.ENSP00000248553,9606.ENSP00000252486,9606.ENSP00000252593,9606.ENSP00000257570,9606.ENSP00000263056,9606.ENSP00000264346,9606.ENSP00000294413,9606.ENSP00000295683,9606.ENSP00000302324,9606.ENSP00000305529,9606.ENSP00000306512,9606.ENSP00000310170,9606.ENSP00000318057,9606.ENSP00000322276,9606.ENSP00000328901,9606.ENSP00000334563,9606.ENSP00000339398,…	CCL2,OAS3,HSPB1,APOE,BST2,OASL,MAP3K8,HERC6,RHCE,CXCR1,RNASE3,SIRPG,CXCL8,FOSL1,EGR3,VNN2,GTF2H2,MYO18B,HLA-DQA1,OAS2,FCGR2B,HLA-DRB1,MMP9,HLA-DQB1,GPNMB,FRMD4B,OAS1,LY6E,NTRK1,VNN3,CCL3,CCL3L3,NR4A3
STRING clusters	CL:19452	ISG15-protein conjugation	3	5	1.81	0.0104	9606.ENSP00000215794,9606.ENSP00000264350,9606.ENSP00000368699	USP18,HERC5,ISG15
GO Process	GO:0007154	Cell communication	87	5320	0.25	8.5e-07	9606.ENSP00000035383,9606.ENSP00000225831,9606.ENSP00000228928,9606.ENSP00000230990,9606.ENSP00000239938,9606.ENSP00000241261,9606.ENSP00000245185,9606.ENSP00000248553,9606.ENSP00000252486,9606.ENSP00000252593,9606.ENSP00000252999,9606.ENSP00000254079,9606.ENSP00000255380,9606.ENSP00000257570,9606.ENSP00000259206,9606.ENSP00000262776,9606.ENSP00000263056,9606.ENSP00000263642,9606.ENSP00000267328,…	LRRC7,CCL2,OAS3,HBEGF,EGR1,TNFSF10,MT2A,HSPB1,APOE,BST2,LAMA5,PPP1R1B,CHRM3,OASL,IL1RN,LGALS3BP,MAP3K8,IFIH1,RAB20,SECTM1,SIK1,OTOF,ARID5B,ANK3,DGKI,SCGB3A1,GRASP,ADCY9,CXCR1,RRAD,SIRPG,CXCL8,ISG20,FOSL1,CD7,EGR3,FFAR3,DEFA3,MX2,HLA-DQA1,OAS2,IFI6,CTSL,FCGR2B,RYR1,HLA-DRB1,XAF1,G0S2,GBP2,GBP1,MMP9,HLA-DQB1,COL15A1,ISG15,KBTBD7,NKX3-1,GPNMB,RSAD2,ARHGAP5,CIT,PLXNA1,SPP1,CARD11,IRF7,MX1,RASGRP3,PRR…
GO Process	GO:0007166	Cell surface receptor signaling pathway	49	2325	0.36	8.41e-06	9606.ENSP00000225831,9606.ENSP00000228928,9606.ENSP00000230990,9606.ENSP00000239938,9606.ENSP00000241261,9606.ENSP00000245185,9606.ENSP00000248553,9606.ENSP00000252593,9606.ENSP00000252999,9606.ENSP00000255380,9606.ENSP00000257570,9606.ENSP00000259206,9606.ENSP00000263056,9606.ENSP00000279873,9606.ENSP00000288490,9606.ENSP00000295683,9606.ENSP00000306512,9606.ENSP00000306565,9606.ENSP00000312027,…	CCL2,OAS3,HBEGF,EGR1,TNFSF10,MT2A,HSPB1,BST2,LAMA5,CHRM3,OASL,IL1RN,MAP3K8,ARID5B,DGKI,CXCR1,CXCL8,ISG20,CD7,MX2,HLA-DQA1,OAS2,IFI6,FCGR2B,HLA-DRB1,XAF1,G0S2,GBP2,GBP1,MMP9,HLA-DQB1,ISG15,RSAD2,PLXNA1,CARD11,IRF7,MX1,OAS1,MOV10,HLA-G,PTPRG,PDGFC,LY6E,NTRK1,CLEC4C,CCL3,CCL3L3,NR4A3,IFI27
GO Process	GO:0070887	Cellular response to chemical stimulus	63	2919	0.37	1.79e-08	9606.ENSP00000225831,9606.ENSP00000228928,9606.ENSP00000230990,9606.ENSP00000239938,9606.ENSP00000242480,9606.ENSP00000245185,9606.ENSP00000248553,9606.ENSP00000252486,9606.ENSP00000252593,9606.ENSP00000252999,9606.ENSP00000255380,9606.ENSP00000256722,9606.ENSP00000257570,9606.ENSP00000259206,9606.ENSP00000263056,9606.ENSP00000263642,9606.ENSP00000267328,9606.ENSP00000279873,9606.ENSP00000280772,…	CCL2,OAS3,HBEGF,EGR1,EGR2,MT2A,HSPB1,APOE,BST2,LAMA5,CHRM3,CMPK2,OASL,IL1RN,MAP3K8,IFIH1,RAB20,ARID5B,ANK3,CPNE2,ADCY9,CXCR1,CXCL8,ISG20,EGR3,FFAR3,DEFA3,MX2,HLA-DQA1,OAS2,IFI6,CTSL,FCGR2B,RYR1,HLA-DRB1,XAF1,GBP5,GBP4,GBP2,GBP1,GBP3,MMP9,HLA-DQB1,SPRY2,ISG15,NKX3-1,RSAD2,SPP1,IRF7,MX1,OAS1,ZFP36L1,PNPT1,HLA-G,MME,PDGFC,FBXO32,NTRK1,NR4A1,CCL3,CCL3L3,NR4A3,IFI27
GO Process	GO:0071345	Cellular response to cytokine stimulus	41	1013	0.64	1.41e-12	9606.ENSP00000225831,9606.ENSP00000228928,9606.ENSP00000239938,9606.ENSP00000245185,9606.ENSP00000252593,9606.ENSP00000252999,9606.ENSP00000257570,9606.ENSP00000259206,9606.ENSP00000263056,9606.ENSP00000267328,9606.ENSP00000279873,9606.ENSP00000295683,9606.ENSP00000306512,9606.ENSP00000306565,9606.ENSP00000333657,9606.ENSP00000339398,9606.ENSP00000342278,9606.ENSP00000342513,9606.ENSP00000353099,…	CCL2,OAS3,EGR1,MT2A,BST2,LAMA5,OASL,IL1RN,MAP3K8,RAB20,ARID5B,CXCR1,CXCL8,ISG20,MX2,HLA-DQA1,OAS2,IFI6,HLA-DRB1,XAF1,GBP5,GBP4,GBP2,GBP1,GBP3,MMP9,HLA-DQB1,SPRY2,ISG15,NKX3-1,RSAD2,IRF7,MX1,OAS1,ZFP36L1,PNPT1,HLA-G,MME,CCL3,CCL3L3,IFI27
STRING clusters	CL:6307	Mixed, incl. ngf-stimulated transcription, and t-helper 17 cell differentiation	5	38	1.15	0.0104	9606.ENSP00000239938,9606.ENSP00000299759,9606.ENSP00000310170,9606.ENSP00000318057,9606.ENSP00000482027	EGR1,RRAD,FOSL1,EGR3,NR4A3
GO Process	GO:0071347	Cellular response to interleukin-1	11	174	0.83	0.00036	9606.ENSP00000225831,9606.ENSP00000239938,9606.ENSP00000259206,9606.ENSP00000263056,9606.ENSP00000306512,9606.ENSP00000359497,9606.ENSP00000359504,9606.ENSP00000359512,9606.ENSP00000370253,9606.ENSP00000477908,9606.ENSP00000480558	CCL2,EGR1,IL1RN,MAP3K8,CXCL8,GBP2,GBP1,GBP3,NKX3-1,CCL3,CCL3L3
GO Process	GO:0071310	Cellular response to organic substance	59	2369	0.43	3.47e-10	9606.ENSP00000225831,9606.ENSP00000228928,9606.ENSP00000239938,9606.ENSP00000242480,9606.ENSP00000245185,9606.ENSP00000248553,9606.ENSP00000252593,9606.ENSP00000252999,9606.ENSP00000255380,9606.ENSP00000256722,9606.ENSP00000257570,9606.ENSP00000259206,9606.ENSP00000263056,9606.ENSP00000263642,9606.ENSP00000267328,9606.ENSP00000279873,9606.ENSP00000294016,9606.ENSP00000295683,9606.ENSP00000306512,…	CCL2,OAS3,EGR1,EGR2,MT2A,HSPB1,BST2,LAMA5,CHRM3,CMPK2,OASL,IL1RN,MAP3K8,IFIH1,RAB20,ARID5B,ADCY9,CXCR1,CXCL8,ISG20,EGR3,FFAR3,DEFA3,MX2,HLA-DQA1,OAS2,IFI6,CTSL,FCGR2B,RYR1,HLA-DRB1,XAF1,GBP5,GBP4,GBP2,GBP1,GBP3,MMP9,HLA-DQB1,SPRY2,ISG15,NKX3-1,RSAD2,SPP1,IRF7,MX1,OAS1,ZFP36L1,PNPT1,HLA-G,MME,PDGFC,FBXO32,NTRK1,NR4A1,CCL3,CCL3L3,NR4A3,IFI27
GO Process	GO:0051716	Cellular response to stimulus	97	6489	0.21	5.13e-06	9606.ENSP00000035383,9606.ENSP00000225831,9606.ENSP00000228928,9606.ENSP00000230990,9606.ENSP00000239938,9606.ENSP00000241261,9606.ENSP00000242480,9606.ENSP00000245185,9606.ENSP00000248553,9606.ENSP00000252486,9606.ENSP00000252593,9606.ENSP00000252999,9606.ENSP00000254079,9606.ENSP00000255380,9606.ENSP00000256722,9606.ENSP00000257570,9606.ENSP00000259206,9606.ENSP00000262776,9606.ENSP00000263056,…	LRRC7,CCL2,OAS3,HBEGF,EGR1,TNFSF10,EGR2,MT2A,HSPB1,APOE,BST2,LAMA5,PPP1R1B,CHRM3,CMPK2,OASL,IL1RN,LGALS3BP,MAP3K8,IFIH1,RAB20,SECTM1,SIK1,ARID5B,ANK3,DGKI,CPNE2,SCGB3A1,GRASP,ADCY9,CXCR1,RRAD,SIRPG,CXCL8,ISG20,FOSL1,CD7,EGR3,FFAR3,DEFA3,GTF2H2,MX2,HLA-DQA1,OAS2,IFI6,CTSL,FCGR2B,RYR1,HLA-DRB1,XAF1,G0S2,GBP5,GBP4,GBP2,GBP1,GBP3,MMP9,HLA-DQB1,COL15A1,SPRY2,ISG15,KBTBD7,NKX3-1,GPNMB,RSAD2,ARHGAP5,CIT…
STRING clusters	CL:6373	Mixed, incl. schizophrenia 19, and pyruvate oxidation	3	5	1.81	0.0104	9606.ENSP00000299759,9606.ENSP00000318057,9606.ENSP00000482027	RRAD,EGR3,NR4A3
Reactome	HSA-380108	Chemokine receptors bind chemokines	5	57	0.98	0.047	9606.ENSP00000225831,9606.ENSP00000295683,9606.ENSP00000306512,9606.ENSP00000477908,9606.ENSP00000480558	CCL2,CXCR1,CXCL8,CCL3,CCL3L3
DISEASES	DOID:0060861	Microphthalmia with limb anomalies	5	8	1.83	0.00032	9606.ENSP00000228928,9606.ENSP00000257570,9606.ENSP00000342278,9606.ENSP00000381601,9606.ENSP00000388001	OAS3,OASL,OAS2,MX1,OAS1
Reactome	HSA-1280215	Cytokine Signaling in Immune system	35	681	0.74	2.47e-13	9606.ENSP00000215794,9606.ENSP00000225831,9606.ENSP00000228928,9606.ENSP00000239938,9606.ENSP00000245185,9606.ENSP00000252593,9606.ENSP00000252999,9606.ENSP00000257570,9606.ENSP00000259206,9606.ENSP00000263056,9606.ENSP00000264350,9606.ENSP00000306512,9606.ENSP00000306565,9606.ENSP00000333657,9606.ENSP00000342278,9606.ENSP00000342513,9606.ENSP00000353099,9606.ENSP00000354822,9606.ENSP00000359488,…	USP18,CCL2,OAS3,EGR1,MT2A,BST2,LAMA5,OASL,IL1RN,MAP3K8,HERC5,CXCL8,ISG20,MX2,OAS2,IFI6,HLA-DRB1,XAF1,GBP5,GBP4,GBP2,GBP1,GBP3,IFIT5,MMP9,HLA-DQB1,ISG15,RSAD2,IRF7,MX1,OAS1,HLA-G,CCL3,CCL3L3,IFI27
GO Process	GO:0019221	Cytokine-mediated signaling pathway	31	678	0.69	2.49e-10	9606.ENSP00000225831,9606.ENSP00000228928,9606.ENSP00000239938,9606.ENSP00000245185,9606.ENSP00000252593,9606.ENSP00000252999,9606.ENSP00000257570,9606.ENSP00000259206,9606.ENSP00000263056,9606.ENSP00000295683,9606.ENSP00000306512,9606.ENSP00000306565,9606.ENSP00000333657,9606.ENSP00000339398,9606.ENSP00000342278,9606.ENSP00000342513,9606.ENSP00000353099,9606.ENSP00000354822,9606.ENSP00000359497,…	CCL2,OAS3,EGR1,MT2A,BST2,LAMA5,OASL,IL1RN,MAP3K8,CXCR1,CXCL8,ISG20,MX2,HLA-DQA1,OAS2,IFI6,HLA-DRB1,XAF1,GBP2,GBP1,MMP9,HLA-DQB1,ISG15,RSAD2,IRF7,MX1,OAS1,HLA-G,CCL3,CCL3L3,IFI27
UniProt Keywords	KW-0963	Cytoplasm	67	5028	0.16	0.0462	9606.ENSP00000035383,9606.ENSP00000215794,9606.ENSP00000221399,9606.ENSP00000228928,9606.ENSP00000239938,9606.ENSP00000248553,9606.ENSP00000251642,9606.ENSP00000252593,9606.ENSP00000254079,9606.ENSP00000257570,9606.ENSP00000259206,9606.ENSP00000263056,9606.ENSP00000263642,9606.ENSP00000264170,9606.ENSP00000264346,9606.ENSP00000264350,9606.ENSP00000270162,9606.ENSP00000280772,9606.ENSP00000288490,…	LRRC7,USP18,TULP2,OAS3,EGR1,HSPB1,DHX58,BST2,PPP1R1B,OASL,IL1RN,MAP3K8,IFIH1,KYNU,HERC6,HERC5,SIK1,ANK3,DGKI,CPNE2,GRASP,S100P,POC1A,ISG20,TUBA8,MX2,MYO18B,DPPA3,OAS2,BCAS4,XAF1,TKTL1,OOEP,GBP5,GBP4,GBP2,GBP1,GBP3,IFI44,IFI44L,PADI4,SPRY2,ISG15,ARHGAP5,CIT,DDX60,CARD11,IRF7,FRMD4B,MX1,PCBP3,APOL6,OAS1,ZFP36L1,MXRA8,MOV10,PNPT1,PLCL1,GTSE1,PDGFC,FBXO32,SLC24A4,SMTNL1,NR4A1,KIF18B,SPATS2L,LRRC6
GO Process	GO:0006952	Defense response	51	1296	0.63	1.55e-15	9606.ENSP00000225831,9606.ENSP00000228928,9606.ENSP00000239938,9606.ENSP00000245185,9606.ENSP00000251642,9606.ENSP00000252593,9606.ENSP00000257570,9606.ENSP00000259030,9606.ENSP00000259206,9606.ENSP00000262776,9606.ENSP00000263642,9606.ENSP00000264170,9606.ENSP00000264350,9606.ENSP00000267328,9606.ENSP00000302324,9606.ENSP00000306512,9606.ENSP00000306565,9606.ENSP00000310170,9606.ENSP00000328230,…	CCL2,OAS3,EGR1,MT2A,DHX58,BST2,OASL,RTP4,IL1RN,LGALS3BP,IFIH1,KYNU,HERC5,RAB20,RNASE3,CXCL8,ISG20,FOSL1,FFAR3,DEFA3,MX2,HLA-DQA1,OAS2,IFI6,TREML4,FCGR2B,HLA-DRB1,XAF1,GBP5,GBP4,GBP2,GBP1,GBP3,IFI44L,IFIT5,HLA-DQB1,PADI4,ISG15,RSAD2,DDX60,SPP1,IRF7,MX1,OAS1,MOV10,HLA-G,ADM,CLEC4C,CCL3,CCL3L3,IFI27
GO Process	GO:0098542	Defense response to other organism	44	900	0.72	6.61e-16	9606.ENSP00000225831,9606.ENSP00000228928,9606.ENSP00000239938,9606.ENSP00000245185,9606.ENSP00000251642,9606.ENSP00000252593,9606.ENSP00000257570,9606.ENSP00000259030,9606.ENSP00000263642,9606.ENSP00000264170,9606.ENSP00000264350,9606.ENSP00000267328,9606.ENSP00000302324,9606.ENSP00000306565,9606.ENSP00000328359,9606.ENSP00000333657,9606.ENSP00000339398,9606.ENSP00000342278,9606.ENSP00000342513,…	CCL2,OAS3,EGR1,MT2A,DHX58,BST2,OASL,RTP4,IFIH1,KYNU,HERC5,RAB20,RNASE3,ISG20,DEFA3,MX2,HLA-DQA1,OAS2,IFI6,TREML4,HLA-DRB1,XAF1,GBP5,GBP4,GBP2,GBP1,GBP3,IFI44L,IFIT5,HLA-DQB1,PADI4,ISG15,RSAD2,DDX60,IRF7,MX1,OAS1,MOV10,HLA-G,ADM,CLEC4C,CCL3,CCL3L3,IFI27
DISEASES	DOID:1936	Atherosclerosis	4	17	1.41	0.0158	9606.ENSP00000200676,9606.ENSP00000225831,9606.ENSP00000252486,9606.ENSP00000371471	CETP,CCL2,APOE,RSAD2
UniProt Keywords	KW-1015	Disulfide bond	52	3304	0.23	0.0096	9606.ENSP00000200676,9606.ENSP00000225831,9606.ENSP00000230990,9606.ENSP00000252593,9606.ENSP00000252999,9606.ENSP00000253109,9606.ENSP00000255380,9606.ENSP00000257245,9606.ENSP00000259206,9606.ENSP00000260126,9606.ENSP00000262776,9606.ENSP00000265598,9606.ENSP00000268150,9606.ENSP00000269389,9606.ENSP00000292641,9606.ENSP00000295683,9606.ENSP00000297668,9606.ENSP00000302324,9606.ENSP00000305529,…	CETP,CCL2,HBEGF,BST2,LAMA5,ANGPTL6,CHRM3,TIMM10,IL1RN,SLCO5A1,LGALS3BP,LAMP3,MFGE8,SECTM1,SCGB3A1,CXCR1,CNTNAP3,RNASE3,SIRPG,CXCL8,CD7,FFAR3,DEFA3,ST6GALNAC3,OLFML1,HLA-DQA1,TREML4,CTSL,FCGR2B,HLA-DRB1,MMP9,HLA-DQB1,COL15A1,ISG15,PLXNA1,LIPN,MXRA8,MDGA1,HLA-G,PLTP,PTPRG,MME,SORCS2,PDGFC,LY6E,NTRK1,ADM,CLEC4C,MGAM,LOC93432,CCL3,CCL3L3
DISEASES	DOID:676	Juvenile rheumatoid arthritis	5	28	1.29	0.0127	9606.ENSP00000339398,9606.ENSP00000353099,9606.ENSP00000364080,9606.ENSP00000388402,9606.ENSP00000412927	HLA-DQA1,HLA-DRB1,HLA-DQB1,ZFP36L1,HLA-G
DISEASES	DOID:7148	Rheumatoid arthritis	8	71	1.09	0.0014	9606.ENSP00000279873,9606.ENSP00000339398,9606.ENSP00000351497,9606.ENSP00000353099,9606.ENSP00000364080,9606.ENSP00000364597,9606.ENSP00000388402,9606.ENSP00000412927	ARID5B,HLA-DQA1,FCGR2B,HLA-DRB1,HLA-DQB1,PADI4,ZFP36L1,HLA-G
DISEASES	DOID:8881	Rosacea	3	6	1.73	0.0205	9606.ENSP00000339398,9606.ENSP00000353099,9606.ENSP00000364080	HLA-DQA1,HLA-DRB1,HLA-DQB1
WikiPathways	WP4217	Ebola virus pathway in host	8	129	0.83	0.0132	9606.ENSP00000252593,9606.ENSP00000268150,9606.ENSP00000339398,9606.ENSP00000345344,9606.ENSP00000353099,9606.ENSP00000364080,9606.ENSP00000380697,9606.ENSP00000412927	BST2,MFGE8,HLA-DQA1,CTSL,HLA-DRB1,HLA-DQB1,IRF7,HLA-G
COMPARTMENTS	GOCC:0005615	Extracellular space	25	985	0.44	0.0136	9606.ENSP00000200676,9606.ENSP00000225831,9606.ENSP00000230990,9606.ENSP00000241261,9606.ENSP00000248553,9606.ENSP00000252486,9606.ENSP00000252593,9606.ENSP00000252999,9606.ENSP00000259206,9606.ENSP00000262776,9606.ENSP00000268150,9606.ENSP00000292641,9606.ENSP00000302324,9606.ENSP00000306512,9606.ENSP00000328359,9606.ENSP00000345344,9606.ENSP00000353099,9606.ENSP00000361405,9606.ENSP00000378517,…	CETP,CCL2,HBEGF,TNFSF10,HSPB1,APOE,BST2,LAMA5,IL1RN,LGALS3BP,MFGE8,SCGB3A1,RNASE3,CXCL8,DEFA3,CTSL,HLA-DRB1,MMP9,SPP1,PLTP,MME,ADM,SLC1A5,MGAM,CCL3
DISEASES	DOID:9744	Type 1 diabetes mellitus	4	25	1.24	0.0395	9606.ENSP00000339398,9606.ENSP00000353099,9606.ENSP00000364080,9606.ENSP00000388001	HLA-DQA1,HLA-DRB1,HLA-DQB1,OAS1
DISEASES	DOID:986	Alopecia areata	5	46	1.07	0.0319	9606.ENSP00000225831,9606.ENSP00000259206,9606.ENSP00000339398,9606.ENSP00000353099,9606.ENSP00000364080	CCL2,IL1RN,HLA-DQA1,HLA-DRB1,HLA-DQB1
UniProt Keywords	KW-0342	GTP-binding	11	337	0.55	0.0374	9606.ENSP00000267328,9606.ENSP00000299759,9606.ENSP00000333326,9606.ENSP00000333657,9606.ENSP00000359488,9606.ENSP00000359490,9606.ENSP00000359497,9606.ENSP00000359504,9606.ENSP00000359512,9606.ENSP00000381601,9606.ENSP00000447053	RAB20,RRAD,TUBA8,MX2,GBP5,GBP4,GBP2,GBP1,GBP3,MX1,RAB5C
GO Function	GO:0001730	2-5-oligoadenylate synthetase activity	3	3	2.03	0.024	9606.ENSP00000228928,9606.ENSP00000342278,9606.ENSP00000388001	OAS3,OAS2,OAS1
GO Function	GO:0003725	Double-stranded rna binding	8	75	1.06	0.003	9606.ENSP00000228928,9606.ENSP00000251642,9606.ENSP00000257570,9606.ENSP00000263642,9606.ENSP00000264852,9606.ENSP00000342278,9606.ENSP00000377344,9606.ENSP00000388001	OAS3,DHX58,OASL,IFIH1,SIDT1,OAS2,DDX60,OAS1
GO Process	GO:0009615	Response to virus	27	293	1	2.55e-15	9606.ENSP00000228928,9606.ENSP00000248553,9606.ENSP00000251642,9606.ENSP00000252593,9606.ENSP00000257570,9606.ENSP00000259030,9606.ENSP00000263642,9606.ENSP00000264350,9606.ENSP00000306565,9606.ENSP00000310170,9606.ENSP00000328359,9606.ENSP00000333657,9606.ENSP00000342278,9606.ENSP00000342513,9606.ENSP00000359504,9606.ENSP00000359512,9606.ENSP00000359783,9606.ENSP00000359787,9606.ENSP00000360860,…	OAS3,HSPB1,DHX58,BST2,OASL,RTP4,IFIH1,HERC5,ISG20,FOSL1,DEFA3,MX2,OAS2,IFI6,GBP1,GBP3,IFI44,IFI44L,IFIT5,ISG15,RSAD2,DDX60,IRF7,MX1,OAS1,MOV10,IFI27
GO Process	GO:0031623	Receptor internalization	6	64	1.01	0.012	9606.ENSP00000295683,9606.ENSP00000306512,9606.ENSP00000328901,9606.ENSP00000333657,9606.ENSP00000381601,9606.ENSP00000436607	CXCR1,CXCL8,GTF2H2,MX2,MX1,ADM
GO Process	GO:0034341	Response to interferon-gamma	21	182	1.1	1.97e-13	9606.ENSP00000225831,9606.ENSP00000228928,9606.ENSP00000245185,9606.ENSP00000252593,9606.ENSP00000257570,9606.ENSP00000264170,9606.ENSP00000267328,9606.ENSP00000339398,9606.ENSP00000342278,9606.ENSP00000353099,9606.ENSP00000359488,9606.ENSP00000359490,9606.ENSP00000359497,9606.ENSP00000359504,9606.ENSP00000359512,9606.ENSP00000364080,9606.ENSP00000380697,9606.ENSP00000388001,9606.ENSP00000412927,…	CCL2,OAS3,MT2A,BST2,OASL,KYNU,RAB20,HLA-DQA1,OAS2,HLA-DRB1,GBP5,GBP4,GBP2,GBP1,GBP3,HLA-DQB1,IRF7,OAS1,HLA-G,CCL3,CCL3L3
GO Process	GO:0035455	Response to interferon-alpha	4	23	1.27	0.0251	9606.ENSP00000252593,9606.ENSP00000265598,9606.ENSP00000333657,9606.ENSP00000388001	BST2,LAMP3,MX2,OAS1
GO Process	GO:0045069	Regulation of viral genome replication	12	99	1.12	2.02e-07	9606.ENSP00000228928,9606.ENSP00000252593,9606.ENSP00000257570,9606.ENSP00000306512,9606.ENSP00000306565,9606.ENSP00000342278,9606.ENSP00000360860,9606.ENSP00000368699,9606.ENSP00000371471,9606.ENSP00000381601,9606.ENSP00000388001,9606.ENSP00000483430	OAS3,BST2,OASL,CXCL8,ISG20,OAS2,IFIT5,ISG15,RSAD2,MX1,OAS1,IFI27
TISSUES	BTO:0000574	Hematopoietic cell	22	933	0.41	0.0313	9606.ENSP00000225831,9606.ENSP00000228928,9606.ENSP00000252486,9606.ENSP00000257570,9606.ENSP00000263056,9606.ENSP00000264346,9606.ENSP00000294413,9606.ENSP00000302324,9606.ENSP00000305529,9606.ENSP00000306512,9606.ENSP00000318057,9606.ENSP00000322276,9606.ENSP00000328901,9606.ENSP00000334563,9606.ENSP00000351497,9606.ENSP00000353099,9606.ENSP00000361405,9606.ENSP00000388001,9606.ENSP00000428572,…	CCL2,OAS3,APOE,OASL,MAP3K8,HERC6,RHCE,RNASE3,SIRPG,CXCL8,EGR3,VNN2,GTF2H2,MYO18B,FCGR2B,HLA-DRB1,MMP9,OAS1,LY6E,VNN3,CCL3,CCL3L3
TISSUES	BTO:0000570	Hematopoietic system	48	2543	0.31	0.0019	9606.ENSP00000200676,9606.ENSP00000225831,9606.ENSP00000228928,9606.ENSP00000241261,9606.ENSP00000248553,9606.ENSP00000252486,9606.ENSP00000252593,9606.ENSP00000257570,9606.ENSP00000262776,9606.ENSP00000263056,9606.ENSP00000263642,9606.ENSP00000264346,9606.ENSP00000270162,9606.ENSP00000294413,9606.ENSP00000295683,9606.ENSP00000302324,9606.ENSP00000305529,9606.ENSP00000306512,9606.ENSP00000310170,…	CETP,CCL2,OAS3,TNFSF10,HSPB1,APOE,BST2,OASL,LGALS3BP,MAP3K8,IFIH1,HERC6,SIK1,RHCE,CXCR1,RNASE3,SIRPG,CXCL8,FOSL1,EGR3,VNN2,DEFA3,GTF2H2,MYO18B,HLA-DQA1,OAS2,FCGR2B,HLA-DRB1,XAF1,GBP4,GBP2,IFIT5,MMP9,HLA-DQB1,PADI4,GPNMB,IRF7,FRMD4B,APOL6,OAS1,MOV10,LY6E,NTRK1,VNN3,SLC1A5,CCL3,CCL3L3,NR4A3
KEGG	hsa05160	Hepatitis C	7	156	0.69	0.0326	9606.ENSP00000228928,9606.ENSP00000333657,9606.ENSP00000342278,9606.ENSP00000371471,9606.ENSP00000380697,9606.ENSP00000381601,9606.ENSP00000388001	OAS3,MX2,OAS2,RSAD2,IRF7,MX1,OAS1
GO Process	GO:0045071	Negative regulation of viral genome replication	10	61	1.25	3.98e-07	9606.ENSP00000228928,9606.ENSP00000252593,9606.ENSP00000257570,9606.ENSP00000306565,9606.ENSP00000342278,9606.ENSP00000360860,9606.ENSP00000368699,9606.ENSP00000371471,9606.ENSP00000381601,9606.ENSP00000388001	OAS3,BST2,OASL,ISG20,OAS2,IFIT5,ISG15,RSAD2,MX1,OAS1
GO Process	GO:0002252	Immune effector process	39	969	0.64	8.15e-12	9606.ENSP00000035383,9606.ENSP00000228928,9606.ENSP00000251642,9606.ENSP00000252593,9606.ENSP00000257570,9606.ENSP00000259030,9606.ENSP00000263642,9606.ENSP00000264350,9606.ENSP00000295683,9606.ENSP00000296370,9606.ENSP00000302324,9606.ENSP00000306565,9606.ENSP00000328359,9606.ENSP00000333657,9606.ENSP00000342278,9606.ENSP00000342513,9606.ENSP00000351497,9606.ENSP00000353099,9606.ENSP00000359504,…	LRRC7,OAS3,DHX58,BST2,OASL,RTP4,IFIH1,HERC5,CXCR1,S100P,RNASE3,ISG20,DEFA3,MX2,OAS2,IFI6,FCGR2B,HLA-DRB1,GBP1,GBP3,IFI44L,IFIT5,MMP9,HLA-DQB1,ISG15,RSAD2,DDX60,IRF7,MX1,OAS1,MOV10,HLA-G,MME,CLEC4C,RAB5C,MGAM,CCL3,NR4A3,IFI27
GO Process	GO:0006955	Immune response	60	1588	0.61	2.21e-17	9606.ENSP00000035383,9606.ENSP00000225831,9606.ENSP00000228928,9606.ENSP00000239938,9606.ENSP00000241261,9606.ENSP00000245185,9606.ENSP00000251642,9606.ENSP00000252593,9606.ENSP00000257570,9606.ENSP00000259206,9606.ENSP00000263642,9606.ENSP00000264170,9606.ENSP00000264350,9606.ENSP00000265598,9606.ENSP00000267328,9606.ENSP00000269389,9606.ENSP00000295683,9606.ENSP00000296370,9606.ENSP00000302324,…	LRRC7,CCL2,OAS3,EGR1,TNFSF10,MT2A,DHX58,BST2,OASL,IL1RN,IFIH1,KYNU,HERC5,LAMP3,RAB20,SECTM1,CXCR1,S100P,RNASE3,CXCL8,ISG20,CD7,FFAR3,DEFA3,MX2,HLA-DQA1,OAS2,IFI6,TREML4,CTSL,FCGR2B,HLA-DRB1,XAF1,GBP5,GBP4,GBP2,GBP1,GBP3,IFI44,IFI44L,IFIT5,MMP9,HLA-DQB1,PADI4,ISG15,RSAD2,DDX60,IRF7,MX1,OAS1,HLA-G,MME,ADM,CLEC4C,RAB5C,MGAM,CCL3,CCL3L3,NR4A3,IFI27
Reactome	HSA-168256	Immune System	56	1956	0.49	5.54e-12	9606.ENSP00000035383,9606.ENSP00000215794,9606.ENSP00000225831,9606.ENSP00000228928,9606.ENSP00000239938,9606.ENSP00000245185,9606.ENSP00000251642,9606.ENSP00000252593,9606.ENSP00000252999,9606.ENSP00000257570,9606.ENSP00000259206,9606.ENSP00000263056,9606.ENSP00000263642,9606.ENSP00000264346,9606.ENSP00000264350,9606.ENSP00000295683,9606.ENSP00000296370,9606.ENSP00000302324,9606.ENSP00000306512,…	LRRC7,USP18,CCL2,OAS3,EGR1,MT2A,DHX58,BST2,LAMA5,OASL,IL1RN,MAP3K8,IFIH1,HERC6,HERC5,CXCR1,S100P,RNASE3,CXCL8,ISG20,DEFA3,TUBA8,MX2,OAS2,IFI6,TREML4,CTSL,FCGR2B,HLA-DRB1,XAF1,GBP5,GBP4,GBP2,GBP1,GBP3,IFIT5,MMP9,HLA-DQB1,ISG15,KBTBD7,RSAD2,CARD11,IRF7,MX1,RASGRP3,PRR5,OAS1,HLA-G,MME,FBXO32,CLEC4C,RAB5C,MGAM,CCL3,CCL3L3,IFI27
DISEASES	DOID:2914	Immune system disease	18	611	0.5	0.0127	9606.ENSP00000225831,9606.ENSP00000252486,9606.ENSP00000259206,9606.ENSP00000263642,9606.ENSP00000279873,9606.ENSP00000302324,9606.ENSP00000312027,9606.ENSP00000339398,9606.ENSP00000351497,9606.ENSP00000353099,9606.ENSP00000364080,9606.ENSP00000364597,9606.ENSP00000368699,9606.ENSP00000380150,9606.ENSP00000388001,9606.ENSP00000388402,9606.ENSP00000412927,9606.ENSP00000418525	CCL2,APOE,IL1RN,IFIH1,ARID5B,RNASE3,CD7,HLA-DQA1,FCGR2B,HLA-DRB1,HLA-DQB1,PADI4,ISG15,CARD11,OAS1,ZFP36L1,HLA-G,MME
GO Process	GO:0002376	Immune system process	69	2481	0.48	7.51e-15	9606.ENSP00000035383,9606.ENSP00000225831,9606.ENSP00000228928,9606.ENSP00000239938,9606.ENSP00000241261,9606.ENSP00000245185,9606.ENSP00000251642,9606.ENSP00000252593,9606.ENSP00000257570,9606.ENSP00000259030,9606.ENSP00000259206,9606.ENSP00000263056,9606.ENSP00000263642,9606.ENSP00000264170,9606.ENSP00000264346,9606.ENSP00000264350,9606.ENSP00000265598,9606.ENSP00000267328,9606.ENSP00000269389,…	LRRC7,CCL2,OAS3,EGR1,TNFSF10,MT2A,DHX58,BST2,OASL,RTP4,IL1RN,MAP3K8,IFIH1,KYNU,HERC6,HERC5,LAMP3,RAB20,SECTM1,CXCR1,S100P,RNASE3,SIRPG,CXCL8,ISG20,CD7,FFAR3,DEFA3,FUT10,MX2,HLA-DQA1,OAS2,IFI6,TREML4,CTSL,FCGR2B,HLA-DRB1,XAF1,GBP5,GBP4,GBP2,GBP1,GBP3,IFI44,IFI44L,IFIT5,MMP9,HLA-DQB1,PADI4,ISG15,RSAD2,DDX60,CARD11,IRF7,MX1,OAS1,ZFP36L1,MOV10,HLA-G,MME,NTRK1,ADM,CLEC4C,RAB5C,MGAM,CCL3,CCL3L3,NR4A3,I…
UniProt Keywords	KW-0391	Immunity	31	522	0.81	1.68e-13	9606.ENSP00000228928,9606.ENSP00000251642,9606.ENSP00000252593,9606.ENSP00000257570,9606.ENSP00000263056,9606.ENSP00000263642,9606.ENSP00000264350,9606.ENSP00000265598,9606.ENSP00000306565,9606.ENSP00000312027,9606.ENSP00000328230,9606.ENSP00000333657,9606.ENSP00000342278,9606.ENSP00000342513,9606.ENSP00000342570,9606.ENSP00000353099,9606.ENSP00000359488,9606.ENSP00000359504,9606.ENSP00000359512,…	OAS3,DHX58,BST2,OASL,MAP3K8,IFIH1,HERC5,LAMP3,ISG20,CD7,FFAR3,MX2,OAS2,IFI6,TREML4,HLA-DRB1,GBP5,GBP1,GBP3,IFIT5,HLA-DQB1,PADI4,ISG15,RSAD2,DDX60,IRF7,MX1,OAS1,HLA-G,CLEC4C,IFI27
GO Process	GO:0048525	Negative regulation of viral process	11	105	1.05	3.45e-06	9606.ENSP00000228928,9606.ENSP00000252593,9606.ENSP00000257570,9606.ENSP00000306565,9606.ENSP00000342278,9606.ENSP00000360860,9606.ENSP00000368699,9606.ENSP00000371471,9606.ENSP00000381601,9606.ENSP00000388001,9606.ENSP00000477908	OAS3,BST2,OASL,ISG20,OAS2,IFIT5,ISG15,RSAD2,MX1,OAS1,CCL3
GO Process	GO:0051607	Defense response to virus	24	210	1.09	2.55e-15	9606.ENSP00000228928,9606.ENSP00000251642,9606.ENSP00000252593,9606.ENSP00000257570,9606.ENSP00000259030,9606.ENSP00000263642,9606.ENSP00000264350,9606.ENSP00000306565,9606.ENSP00000328359,9606.ENSP00000333657,9606.ENSP00000342278,9606.ENSP00000342513,9606.ENSP00000359504,9606.ENSP00000359512,9606.ENSP00000359787,9606.ENSP00000360860,9606.ENSP00000368699,9606.ENSP00000371471,9606.ENSP00000377344,…	OAS3,DHX58,BST2,OASL,RTP4,IFIH1,HERC5,ISG20,DEFA3,MX2,OAS2,IFI6,GBP1,GBP3,IFI44L,IFIT5,ISG15,RSAD2,DDX60,IRF7,MX1,OAS1,MOV10,IFI27
KEGG	hsa05164	Influenza A	12	165	0.9	2.97e-05	9606.ENSP00000225831,9606.ENSP00000228928,9606.ENSP00000241261,9606.ENSP00000263642,9606.ENSP00000306512,9606.ENSP00000333657,9606.ENSP00000339398,9606.ENSP00000342278,9606.ENSP00000371471,9606.ENSP00000380697,9606.ENSP00000381601,9606.ENSP00000388001	CCL2,OAS3,TNFSF10,IFIH1,CXCL8,MX2,HLA-DQA1,OAS2,RSAD2,IRF7,MX1,OAS1
GO Process	GO:0045087	Innate immune response	40	703	0.79	3.78e-16	9606.ENSP00000225831,9606.ENSP00000228928,9606.ENSP00000239938,9606.ENSP00000245185,9606.ENSP00000251642,9606.ENSP00000252593,9606.ENSP00000257570,9606.ENSP00000263642,9606.ENSP00000264170,9606.ENSP00000264350,9606.ENSP00000267328,9606.ENSP00000302324,9606.ENSP00000306565,9606.ENSP00000328359,9606.ENSP00000333657,9606.ENSP00000339398,9606.ENSP00000342278,9606.ENSP00000342513,9606.ENSP00000342570,…	CCL2,OAS3,EGR1,MT2A,DHX58,BST2,OASL,IFIH1,KYNU,HERC5,RAB20,RNASE3,ISG20,DEFA3,MX2,HLA-DQA1,OAS2,IFI6,TREML4,HLA-DRB1,XAF1,GBP5,GBP4,GBP2,GBP1,GBP3,IFIT5,HLA-DQB1,PADI4,ISG15,RSAD2,DDX60,IRF7,MX1,OAS1,HLA-G,CLEC4C,CCL3,CCL3L3,IFI27
UniProt Keywords	KW-0399	Innate immunity	21	324	0.85	1.8e-09	9606.ENSP00000228928,9606.ENSP00000251642,9606.ENSP00000252593,9606.ENSP00000257570,9606.ENSP00000263642,9606.ENSP00000264350,9606.ENSP00000306565,9606.ENSP00000333657,9606.ENSP00000342278,9606.ENSP00000342513,9606.ENSP00000342570,9606.ENSP00000360860,9606.ENSP00000364597,9606.ENSP00000368699,9606.ENSP00000371471,9606.ENSP00000377344,9606.ENSP00000380697,9606.ENSP00000381601,9606.ENSP00000388001,…	OAS3,DHX58,BST2,OASL,IFIH1,HERC5,ISG20,MX2,OAS2,IFI6,TREML4,IFIT5,PADI4,ISG15,RSAD2,DDX60,IRF7,MX1,OAS1,CLEC4C,IFI27
GO Process	GO:0060333	Interferon-gamma-mediated signaling pathway	12	70	1.27	6.19e-09	9606.ENSP00000228928,9606.ENSP00000245185,9606.ENSP00000257570,9606.ENSP00000339398,9606.ENSP00000342278,9606.ENSP00000353099,9606.ENSP00000359497,9606.ENSP00000359504,9606.ENSP00000364080,9606.ENSP00000380697,9606.ENSP00000388001,9606.ENSP00000412927	OAS3,MT2A,OASL,HLA-DQA1,OAS2,HLA-DRB1,GBP2,GBP1,HLA-DQB1,IRF7,OAS1,HLA-G
GO Process	GO:0060337	Type i interferon signaling pathway	17	67	1.44	2.55e-15	9606.ENSP00000228928,9606.ENSP00000239938,9606.ENSP00000252593,9606.ENSP00000257570,9606.ENSP00000306565,9606.ENSP00000333657,9606.ENSP00000342278,9606.ENSP00000342513,9606.ENSP00000354822,9606.ENSP00000359497,9606.ENSP00000368699,9606.ENSP00000371471,9606.ENSP00000380697,9606.ENSP00000381601,9606.ENSP00000388001,9606.ENSP00000412927,9606.ENSP00000483430	OAS3,EGR1,BST2,OASL,ISG20,MX2,OAS2,IFI6,XAF1,GBP2,ISG15,RSAD2,IRF7,MX1,OAS1,HLA-G,IFI27
GO Process	GO:0060700	Regulation of ribonuclease activity	4	9	1.68	0.0014	9606.ENSP00000228928,9606.ENSP00000257570,9606.ENSP00000342278,9606.ENSP00000388001	OAS3,OASL,OAS2,OAS1
GO Process	GO:0071346	Cellular response to interferon-gamma	19	161	1.11	3.18e-12	9606.ENSP00000225831,9606.ENSP00000228928,9606.ENSP00000245185,9606.ENSP00000257570,9606.ENSP00000267328,9606.ENSP00000339398,9606.ENSP00000342278,9606.ENSP00000353099,9606.ENSP00000359488,9606.ENSP00000359490,9606.ENSP00000359497,9606.ENSP00000359504,9606.ENSP00000359512,9606.ENSP00000364080,9606.ENSP00000380697,9606.ENSP00000388001,9606.ENSP00000412927,9606.ENSP00000477908,9606.ENSP00000480558	CCL2,OAS3,MT2A,OASL,RAB20,HLA-DQA1,OAS2,HLA-DRB1,GBP5,GBP4,GBP2,GBP1,GBP3,HLA-DQB1,IRF7,OAS1,HLA-G,CCL3,CCL3L3
GO Process	GO:1903900	Regulation of viral life cycle	14	153	1	2.02e-07	9606.ENSP00000228928,9606.ENSP00000252593,9606.ENSP00000257570,9606.ENSP00000265598,9606.ENSP00000306512,9606.ENSP00000306565,9606.ENSP00000342278,9606.ENSP00000353099,9606.ENSP00000360860,9606.ENSP00000368699,9606.ENSP00000371471,9606.ENSP00000381601,9606.ENSP00000388001,9606.ENSP00000483430	OAS3,BST2,OASL,LAMP3,CXCL8,ISG20,OAS2,HLA-DRB1,IFIT5,ISG15,RSAD2,MX1,OAS1,IFI27
Reactome	HSA-1169410	Antiviral mechanism by IFN-stimulated genes	9	81	1.08	5.06e-05	9606.ENSP00000215794,9606.ENSP00000228928,9606.ENSP00000257570,9606.ENSP00000264350,9606.ENSP00000333657,9606.ENSP00000342278,9606.ENSP00000368699,9606.ENSP00000381601,9606.ENSP00000388001	USP18,OAS3,OASL,HERC5,MX2,OAS2,ISG15,MX1,OAS1
Reactome	HSA-6783783	Interleukin-10 signaling	5	45	1.08	0.0211	9606.ENSP00000225831,9606.ENSP00000259206,9606.ENSP00000306512,9606.ENSP00000477908,9606.ENSP00000480558	CCL2,IL1RN,CXCL8,CCL3,CCL3L3
Reactome	HSA-877300	Interferon gamma signaling	14	88	1.24	2.28e-10	9606.ENSP00000228928,9606.ENSP00000245185,9606.ENSP00000257570,9606.ENSP00000342278,9606.ENSP00000353099,9606.ENSP00000359488,9606.ENSP00000359490,9606.ENSP00000359497,9606.ENSP00000359504,9606.ENSP00000359512,9606.ENSP00000364080,9606.ENSP00000380697,9606.ENSP00000388001,9606.ENSP00000412927	OAS3,MT2A,OASL,OAS2,HLA-DRB1,GBP5,GBP4,GBP2,GBP1,GBP3,HLA-DQB1,IRF7,OAS1,HLA-G
GO Process	GO:0044419	Interspecies interaction between organisms	55	1899	0.5	8.15e-12	9606.ENSP00000225831,9606.ENSP00000228928,9606.ENSP00000239938,9606.ENSP00000245185,9606.ENSP00000248553,9606.ENSP00000251642,9606.ENSP00000252486,9606.ENSP00000252593,9606.ENSP00000256722,9606.ENSP00000257570,9606.ENSP00000259030,9606.ENSP00000263642,9606.ENSP00000264170,9606.ENSP00000264346,9606.ENSP00000264350,9606.ENSP00000267328,9606.ENSP00000302324,9606.ENSP00000306512,9606.ENSP00000306565,…	CCL2,OAS3,EGR1,MT2A,HSPB1,DHX58,APOE,BST2,CMPK2,OASL,RTP4,IFIH1,KYNU,HERC6,HERC5,RAB20,RNASE3,CXCL8,ISG20,FOSL1,DEFA3,GTF2H2,MX2,HLA-DQA1,OAS2,IFI6,TREML4,FCGR2B,HLA-DRB1,XAF1,GBP5,GBP4,GBP2,GBP1,GBP3,IFI44,IFI44L,IFIT5,HLA-DQB1,PADI4,ISG15,RSAD2,DDX60,IRF7,MX1,OAS1,MXRA8,MOV10,HLA-G,ADM,CLEC4C,SLC1A5,CCL3,CCL3L3,IFI27
GO Process	GO:0035556	Intracellular signal transduction	34	1712	0.33	0.0059	9606.ENSP00000035383,9606.ENSP00000225831,9606.ENSP00000230990,9606.ENSP00000248553,9606.ENSP00000252486,9606.ENSP00000254079,9606.ENSP00000255380,9606.ENSP00000263056,9606.ENSP00000263642,9606.ENSP00000267328,9606.ENSP00000270162,9606.ENSP00000288490,9606.ENSP00000294016,9606.ENSP00000295683,9606.ENSP00000299759,9606.ENSP00000305529,9606.ENSP00000306512,9606.ENSP00000342513,9606.ENSP00000352608,…	LRRC7,CCL2,HBEGF,HSPB1,APOE,PPP1R1B,CHRM3,MAP3K8,IFIH1,RAB20,SIK1,DGKI,ADCY9,CXCR1,RRAD,SIRPG,CXCL8,IFI6,RYR1,KBTBD7,NKX3-1,ARHGAP5,CIT,CARD11,IRF7,RASGRP3,PRR5,ZFP36L1,PLCL1,GTSE1,NTRK1,ADM,RAB5C,CCL3
Reactome	HSA-8964058	HDL remodeling	3	10	1.51	0.04	9606.ENSP00000200676,9606.ENSP00000252486,9606.ENSP00000417138	CETP,APOE,PLTP
Reactome	HSA-8983711	OAS antiviral response	4	9	1.68	0.0014	9606.ENSP00000228928,9606.ENSP00000257570,9606.ENSP00000342278,9606.ENSP00000388001	OAS3,OASL,OAS2,OAS1
GO Process	GO:0002443	Leukocyte mediated immunity	17	641	0.46	0.0279	9606.ENSP00000035383,9606.ENSP00000252593,9606.ENSP00000295683,9606.ENSP00000296370,9606.ENSP00000302324,9606.ENSP00000351497,9606.ENSP00000353099,9606.ENSP00000361405,9606.ENSP00000364080,9606.ENSP00000380697,9606.ENSP00000412927,9606.ENSP00000418525,9606.ENSP00000440428,9606.ENSP00000447053,9606.ENSP00000447378,9606.ENSP00000477908,9606.ENSP00000482027	LRRC7,BST2,CXCR1,S100P,RNASE3,FCGR2B,HLA-DRB1,MMP9,HLA-DQB1,IRF7,HLA-G,MME,CLEC4C,RAB5C,MGAM,CCL3,NR4A3
Reactome	HSA-9031628	NGF-stimulated transcription	5	39	1.14	0.0135	9606.ENSP00000239938,9606.ENSP00000242480,9606.ENSP00000299759,9606.ENSP00000310170,9606.ENSP00000318057	EGR1,EGR2,RRAD,FOSL1,EGR3
KEGG	hsa05162	Measles	8	138	0.8	0.0069	9606.ENSP00000228928,9606.ENSP00000263642,9606.ENSP00000333657,9606.ENSP00000342278,9606.ENSP00000351497,9606.ENSP00000380697,9606.ENSP00000381601,9606.ENSP00000388001	OAS3,IFIH1,MX2,OAS2,FCGR2B,IRF7,MX1,OAS1
Reactome	HSA-909733	Interferon alpha/beta signaling	19	69	1.47	4.08e-18	9606.ENSP00000215794,9606.ENSP00000228928,9606.ENSP00000239938,9606.ENSP00000252593,9606.ENSP00000257570,9606.ENSP00000306565,9606.ENSP00000333657,9606.ENSP00000342278,9606.ENSP00000342513,9606.ENSP00000354822,9606.ENSP00000359497,9606.ENSP00000360860,9606.ENSP00000368699,9606.ENSP00000371471,9606.ENSP00000380697,9606.ENSP00000381601,9606.ENSP00000388001,9606.ENSP00000412927,9606.ENSP00000483430	USP18,OAS3,EGR1,BST2,OASL,ISG20,MX2,OAS2,IFI6,XAF1,GBP2,IFIT5,ISG15,RSAD2,IRF7,MX1,OAS1,HLA-G,IFI27
Reactome	HSA-913531	Interferon Signaling	27	196	1.17	2.79e-19	9606.ENSP00000215794,9606.ENSP00000228928,9606.ENSP00000239938,9606.ENSP00000245185,9606.ENSP00000252593,9606.ENSP00000257570,9606.ENSP00000264350,9606.ENSP00000306565,9606.ENSP00000333657,9606.ENSP00000342278,9606.ENSP00000342513,9606.ENSP00000353099,9606.ENSP00000354822,9606.ENSP00000359488,9606.ENSP00000359490,9606.ENSP00000359497,9606.ENSP00000359504,9606.ENSP00000359512,9606.ENSP00000360860,…	USP18,OAS3,EGR1,MT2A,BST2,OASL,HERC5,ISG20,MX2,OAS2,IFI6,HLA-DRB1,XAF1,GBP5,GBP4,GBP2,GBP1,GBP3,IFIT5,HLA-DQB1,ISG15,RSAD2,IRF7,MX1,OAS1,HLA-G,IFI27
InterPro	IPR002934	Polymerase, nucleotidyl transferase domain	3	7	1.67	0.0419	9606.ENSP00000228928,9606.ENSP00000342278,9606.ENSP00000388001	OAS3,OAS2,OAS1
InterPro	IPR003191	Guanylate-binding protein/Atlastin, C-terminal	5	9	1.78	0.00039	9606.ENSP00000359488,9606.ENSP00000359490,9606.ENSP00000359497,9606.ENSP00000359504,9606.ENSP00000359512	GBP5,GBP4,GBP2,GBP1,GBP3
STRING clusters	CL:6223	Mixed, incl. host-pathogen interaction of human coronaviruses - mapk signaling, and mitogen-activated protein (map) kinase phosphatase	6	80	0.91	0.0289	9606.ENSP00000239938,9606.ENSP00000248553,9606.ENSP00000299759,9606.ENSP00000310170,9606.ENSP00000318057,9606.ENSP00000482027	EGR1,HSPB1,RRAD,FOSL1,EGR3,NR4A3
STRING clusters	CL:18848	Mixed, incl. immunoregulatory interactions between a lymphoid and a non-lymphoid cell, and aig1-type guanine nucleotide-binding (g) domain	8	120	0.86	0.0068	9606.ENSP00000252593,9606.ENSP00000265598,9606.ENSP00000269389,9606.ENSP00000312027,9606.ENSP00000342570,9606.ENSP00000412927,9606.ENSP00000418525,9606.ENSP00000440428	BST2,LAMP3,SECTM1,CD7,TREML4,HLA-G,MME,CLEC4C
InterPro	IPR003597	Immunoglobulin C1-set	5	43	1.1	0.0397	9606.ENSP00000305529,9606.ENSP00000339398,9606.ENSP00000353099,9606.ENSP00000364080,9606.ENSP00000412927	SIRPG,HLA-DQA1,HLA-DRB1,HLA-DQB1,HLA-G
InterPro	IPR006116	2-5OAS/ClassI-CCAase, nucleotidyltransferase domain	4	4	2.03	0.00052	9606.ENSP00000228928,9606.ENSP00000257570,9606.ENSP00000342278,9606.ENSP00000388001	OAS3,OASL,OAS2,OAS1
InterPro	IPR006117	2-5-oligoadenylate synthetase, C-terminal conserved site	4	4	2.03	0.00052	9606.ENSP00000228928,9606.ENSP00000257570,9606.ENSP00000342278,9606.ENSP00000388001	OAS3,OASL,OAS2,OAS1
InterPro	IPR015894	Guanylate-binding protein, N-terminal	5	11	1.69	0.00042	9606.ENSP00000359488,9606.ENSP00000359490,9606.ENSP00000359497,9606.ENSP00000359504,9606.ENSP00000359512	GBP5,GBP4,GBP2,GBP1,GBP3
InterPro	IPR018952	2-5-oligoadenylate synthetase 1, domain 2/C-terminal	4	4	2.03	0.00052	9606.ENSP00000228928,9606.ENSP00000257570,9606.ENSP00000342278,9606.ENSP00000388001	OAS3,OASL,OAS2,OAS1
InterPro	IPR021849	Early growth response, N-terminal	3	3	2.03	0.0091	9606.ENSP00000239938,9606.ENSP00000242480,9606.ENSP00000318057	EGR1,EGR2,EGR3
InterPro	IPR026774	2-5-oligoadenylate synthase	4	4	2.03	0.00052	9606.ENSP00000228928,9606.ENSP00000257570,9606.ENSP00000342278,9606.ENSP00000388001	OAS3,OASL,OAS2,OAS1
InterPro	IPR030386	GB1/RHD3-type guanine nucleotide-binding (G) domain	5	11	1.69	0.00042	9606.ENSP00000359488,9606.ENSP00000359490,9606.ENSP00000359497,9606.ENSP00000359504,9606.ENSP00000359512	GBP5,GBP4,GBP2,GBP1,GBP3
KEGG	hsa04621	NOD-like receptor signaling pathway	12	174	0.87	2.97e-05	9606.ENSP00000225831,9606.ENSP00000228928,9606.ENSP00000306512,9606.ENSP00000328359,9606.ENSP00000342278,9606.ENSP00000359488,9606.ENSP00000359490,9606.ENSP00000359497,9606.ENSP00000359504,9606.ENSP00000359512,9606.ENSP00000380697,9606.ENSP00000388001	CCL2,OAS3,CXCL8,DEFA3,OAS2,GBP5,GBP4,GBP2,GBP1,GBP3,IRF7,OAS1
WikiPathways	WP4341	Non-genomic actions of 1,25 dihydroxyvitamin D3	6	71	0.96	0.0132	9606.ENSP00000225831,9606.ENSP00000306512,9606.ENSP00000342278,9606.ENSP00000359787,9606.ENSP00000368699,9606.ENSP00000371471	CCL2,CXCL8,OAS2,IFI44L,ISG15,RSAD2
WikiPathways	WP3865	Novel intracellular components of RIG-I-like receptor (RLR) pathway	5	59	0.96	0.0341	9606.ENSP00000251642,9606.ENSP00000263642,9606.ENSP00000306512,9606.ENSP00000368699,9606.ENSP00000380697	DHX58,IFIH1,CXCL8,ISG15,IRF7
InterPro	IPR036543	Guanylate-binding protein, C-terminal domain superfamily	5	10	1.73	0.00039	9606.ENSP00000359488,9606.ENSP00000359490,9606.ENSP00000359497,9606.ENSP00000359504,9606.ENSP00000359512	GBP5,GBP4,GBP2,GBP1,GBP3
InterPro	IPR037684	Guanylate-binding protein, C-terminal	5	7	1.89	0.00031	9606.ENSP00000359488,9606.ENSP00000359490,9606.ENSP00000359497,9606.ENSP00000359504,9606.ENSP00000359512	GBP5,GBP4,GBP2,GBP1,GBP3
TISSUES	BTO:0001044	Phagocyte	8	117	0.87	0.0192	9606.ENSP00000228928,9606.ENSP00000252486,9606.ENSP00000257570,9606.ENSP00000306512,9606.ENSP00000322276,9606.ENSP00000361405,9606.ENSP00000428572,9606.ENSP00000440594	OAS3,APOE,OASL,CXCL8,VNN2,MMP9,LY6E,VNN3
InterPro	IPR027417	P-loop containing nucleoside triphosphate hydrolase	21	861	0.42	0.0345	9606.ENSP00000251642,9606.ENSP00000256722,9606.ENSP00000263642,9606.ENSP00000267328,9606.ENSP00000299759,9606.ENSP00000333657,9606.ENSP00000334563,9606.ENSP00000359488,9606.ENSP00000359490,9606.ENSP00000359497,9606.ENSP00000359504,9606.ENSP00000359512,9606.ENSP00000359783,9606.ENSP00000359787,9606.ENSP00000371897,9606.ENSP00000377344,9606.ENSP00000380150,9606.ENSP00000381601,9606.ENSP00000399797,…	DHX58,CMPK2,IFIH1,RAB20,RRAD,MX2,MYO18B,GBP5,GBP4,GBP2,GBP1,GBP3,IFI44,IFI44L,ARHGAP5,DDX60,CARD11,MX1,MOV10,RAB5C,KIF18B
InterPro	IPR043518	2-5-oligoadenylate synthetase, N-terminal conserved site	4	4	2.03	0.00052	9606.ENSP00000228928,9606.ENSP00000257570,9606.ENSP00000342278,9606.ENSP00000388001	OAS3,OASL,OAS2,OAS1
GO Process	GO:0070374	Positive regulation of erk1 and erk2 cascade	10	209	0.71	0.0099	9606.ENSP00000225831,9606.ENSP00000252486,9606.ENSP00000353099,9606.ENSP00000366306,9606.ENSP00000371420,9606.ENSP00000422464,9606.ENSP00000429240,9606.ENSP00000431418,9606.ENSP00000477908,9606.ENSP00000480558	CCL2,APOE,HLA-DRB1,SPRY2,GPNMB,PDGFC,ENSP00000429240,NTRK1,CCL3,CCL3L3
GO Process	GO:0002684	Positive regulation of immune system process	22	949	0.4	0.022	9606.ENSP00000225831,9606.ENSP00000251642,9606.ENSP00000263056,9606.ENSP00000305529,9606.ENSP00000306512,9606.ENSP00000318057,9606.ENSP00000328230,9606.ENSP00000339398,9606.ENSP00000351497,9606.ENSP00000353099,9606.ENSP00000359488,9606.ENSP00000364080,9606.ENSP00000368699,9606.ENSP00000371471,9606.ENSP00000377344,9606.ENSP00000380150,9606.ENSP00000380697,9606.ENSP00000388402,9606.ENSP00000412927,…	CCL2,DHX58,MAP3K8,SIRPG,CXCL8,EGR3,FFAR3,HLA-DQA1,FCGR2B,HLA-DRB1,GBP5,HLA-DQB1,ISG15,RSAD2,DDX60,CARD11,IRF7,ZFP36L1,HLA-G,CLEC4C,CCL3,NR4A3
GO Process	GO:1902533	Positive regulation of intracellular signal transduction	23	1041	0.38	0.0275	9606.ENSP00000225831,9606.ENSP00000230990,9606.ENSP00000241261,9606.ENSP00000251642,9606.ENSP00000252486,9606.ENSP00000252593,9606.ENSP00000263056,9606.ENSP00000269389,9606.ENSP00000288490,9606.ENSP00000351497,9606.ENSP00000353099,9606.ENSP00000360860,9606.ENSP00000366306,9606.ENSP00000370253,9606.ENSP00000371420,9606.ENSP00000377344,9606.ENSP00000380150,9606.ENSP00000384848,9606.ENSP00000422464,…	CCL2,HBEGF,TNFSF10,DHX58,APOE,BST2,MAP3K8,SECTM1,DGKI,FCGR2B,HLA-DRB1,IFIT5,SPRY2,NKX3-1,GPNMB,DDX60,CARD11,PRR5,PDGFC,ENSP00000429240,NTRK1,CCL3,CCL3L3
GO Process	GO:0051240	Positive regulation of multicellular organismal process	33	1770	0.3	0.0231	9606.ENSP00000035383,9606.ENSP00000230990,9606.ENSP00000239938,9606.ENSP00000242480,9606.ENSP00000248553,9606.ENSP00000251642,9606.ENSP00000252486,9606.ENSP00000255380,9606.ENSP00000263642,9606.ENSP00000306512,9606.ENSP00000318057,9606.ENSP00000328230,9606.ENSP00000353099,9606.ENSP00000355996,9606.ENSP00000359488,9606.ENSP00000361405,9606.ENSP00000368699,9606.ENSP00000370253,9606.ENSP00000371471,…	LRRC7,HBEGF,EGR1,EGR2,HSPB1,DHX58,APOE,CHRM3,IFIH1,CXCL8,EGR3,FFAR3,HLA-DRB1,G0S2,GBP5,MMP9,ISG15,NKX3-1,RSAD2,PLXNA1,DDX60,SPP1,CARD11,IRF7,ZFP36L1,HLA-G,MME,PDGFC,NTRK1,SMTNL1,ADM,CCL3,NR4A3
GO Process	GO:0048584	Positive regulation of response to stimulus	38	2257	0.26	0.0459	9606.ENSP00000225831,9606.ENSP00000230990,9606.ENSP00000241261,9606.ENSP00000248553,9606.ENSP00000251642,9606.ENSP00000252486,9606.ENSP00000252593,9606.ENSP00000263056,9606.ENSP00000263642,9606.ENSP00000269389,9606.ENSP00000288490,9606.ENSP00000306512,9606.ENSP00000328230,9606.ENSP00000339398,9606.ENSP00000342570,9606.ENSP00000351497,9606.ENSP00000353099,9606.ENSP00000355996,9606.ENSP00000359488,…	CCL2,HBEGF,TNFSF10,HSPB1,DHX58,APOE,BST2,MAP3K8,IFIH1,SECTM1,DGKI,CXCL8,FFAR3,HLA-DQA1,TREML4,FCGR2B,HLA-DRB1,G0S2,GBP5,IFIT5,MMP9,HLA-DQB1,SPRY2,NKX3-1,GPNMB,RSAD2,DDX60,CARD11,IRF7,PRR5,HLA-G,PDGFC,ENSP00000429240,NTRK1,CLEC4C,CCL3,CCL3L3,NR4A3
DISEASES	DOID:612	Primary immunodeficiency disease	15	426	0.58	0.0127	9606.ENSP00000225831,9606.ENSP00000259206,9606.ENSP00000263642,9606.ENSP00000279873,9606.ENSP00000302324,9606.ENSP00000339398,9606.ENSP00000351497,9606.ENSP00000353099,9606.ENSP00000364080,9606.ENSP00000364597,9606.ENSP00000368699,9606.ENSP00000380150,9606.ENSP00000388001,9606.ENSP00000388402,9606.ENSP00000412927	CCL2,IL1RN,IFIH1,ARID5B,RNASE3,HLA-DQA1,FCGR2B,HLA-DRB1,HLA-DQB1,PADI4,ISG15,CARD11,OAS1,ZFP36L1,HLA-G
InterPro	IPR043519	Nucleotidyltransferase superfamily	4	23	1.27	0.0459	9606.ENSP00000228928,9606.ENSP00000257570,9606.ENSP00000342278,9606.ENSP00000388001	OAS3,OASL,OAS2,OAS1
GO Process	GO:0022407	Regulation of cell-cell adhesion	13	424	0.52	0.0459	9606.ENSP00000225831,9606.ENSP00000259206,9606.ENSP00000263056,9606.ENSP00000280772,9606.ENSP00000305529,9606.ENSP00000318057,9606.ENSP00000351497,9606.ENSP00000353099,9606.ENSP00000371420,9606.ENSP00000380150,9606.ENSP00000402584,9606.ENSP00000412927,9606.ENSP00000482027	CCL2,IL1RN,MAP3K8,ANK3,SIRPG,EGR3,FCGR2B,HLA-DRB1,GPNMB,CARD11,MDGA1,HLA-G,NR4A3
GO Process	GO:0001817	Regulation of cytokine production	20	742	0.46	0.0068	9606.ENSP00000239938,9606.ENSP00000248553,9606.ENSP00000251642,9606.ENSP00000252593,9606.ENSP00000263642,9606.ENSP00000264350,9606.ENSP00000328230,9606.ENSP00000351497,9606.ENSP00000353099,9606.ENSP00000359488,9606.ENSP00000359504,9606.ENSP00000368699,9606.ENSP00000371420,9606.ENSP00000371471,9606.ENSP00000377344,9606.ENSP00000380150,9606.ENSP00000380697,9606.ENSP00000412927,9606.ENSP00000477908,…	EGR1,HSPB1,DHX58,BST2,IFIH1,HERC5,FFAR3,FCGR2B,HLA-DRB1,GBP5,GBP1,ISG15,GPNMB,RSAD2,DDX60,CARD11,IRF7,HLA-G,CCL3,NR4A3
GO Process	GO:0070372	Regulation of erk1 and erk2 cascade	11	292	0.61	0.0275	9606.ENSP00000225831,9606.ENSP00000252486,9606.ENSP00000353099,9606.ENSP00000359504,9606.ENSP00000366306,9606.ENSP00000371420,9606.ENSP00000422464,9606.ENSP00000429240,9606.ENSP00000431418,9606.ENSP00000477908,9606.ENSP00000480558	CCL2,APOE,HLA-DRB1,GBP1,SPRY2,GPNMB,PDGFC,ENSP00000429240,NTRK1,CCL3,CCL3L3
GO Process	GO:0002682	Regulation of immune system process	30	1514	0.33	0.0186	9606.ENSP00000215794,9606.ENSP00000225831,9606.ENSP00000251642,9606.ENSP00000252486,9606.ENSP00000252593,9606.ENSP00000263056,9606.ENSP00000264350,9606.ENSP00000305529,9606.ENSP00000306512,9606.ENSP00000318057,9606.ENSP00000328230,9606.ENSP00000339398,9606.ENSP00000342570,9606.ENSP00000351497,9606.ENSP00000353099,9606.ENSP00000359488,9606.ENSP00000359504,9606.ENSP00000364080,9606.ENSP00000368699,…	USP18,CCL2,DHX58,APOE,BST2,MAP3K8,HERC5,SIRPG,CXCL8,EGR3,FFAR3,HLA-DQA1,TREML4,FCGR2B,HLA-DRB1,GBP5,GBP1,HLA-DQB1,ISG15,GPNMB,RSAD2,DDX60,CARD11,IRF7,ZFP36L1,MOV10,HLA-G,CLEC4C,CCL3,NR4A3
UniProt Keywords	KW-0051	Antiviral defense	22	127	1.27	1.12e-17	9606.ENSP00000228928,9606.ENSP00000251642,9606.ENSP00000252593,9606.ENSP00000257570,9606.ENSP00000263642,9606.ENSP00000264350,9606.ENSP00000306565,9606.ENSP00000328359,9606.ENSP00000333657,9606.ENSP00000342278,9606.ENSP00000342513,9606.ENSP00000359504,9606.ENSP00000359512,9606.ENSP00000359787,9606.ENSP00000360860,9606.ENSP00000368699,9606.ENSP00000371471,9606.ENSP00000377344,9606.ENSP00000380697,…	OAS3,DHX58,BST2,OASL,IFIH1,HERC5,ISG20,DEFA3,MX2,OAS2,IFI6,GBP1,GBP3,IFI44L,IFIT5,ISG15,RSAD2,DDX60,IRF7,MX1,OAS1,IFI27
Pfam	PF02263	Guanylate-binding protein, N-terminal domain	5	11	1.69	0.00042	9606.ENSP00000359488,9606.ENSP00000359490,9606.ENSP00000359497,9606.ENSP00000359504,9606.ENSP00000359512	GBP5,GBP4,GBP2,GBP1,GBP3
Pfam	PF02841	Guanylate-binding protein, C-terminal domain	5	9	1.78	0.00039	9606.ENSP00000359488,9606.ENSP00000359490,9606.ENSP00000359497,9606.ENSP00000359504,9606.ENSP00000359512	GBP5,GBP4,GBP2,GBP1,GBP3
GO Process	GO:0050792	Regulation of viral process	16	215	0.91	2.02e-07	9606.ENSP00000228928,9606.ENSP00000252486,9606.ENSP00000252593,9606.ENSP00000257570,9606.ENSP00000265598,9606.ENSP00000306512,9606.ENSP00000306565,9606.ENSP00000342278,9606.ENSP00000353099,9606.ENSP00000360860,9606.ENSP00000368699,9606.ENSP00000371471,9606.ENSP00000381601,9606.ENSP00000388001,9606.ENSP00000477908,9606.ENSP00000483430	OAS3,APOE,BST2,OASL,LAMP3,CXCL8,ISG20,OAS2,HLA-DRB1,IFIT5,ISG15,RSAD2,MX1,OAS1,CCL3,IFI27
GO Process	GO:0009617	Response to bacterium	17	634	0.46	0.0259	9606.ENSP00000225831,9606.ENSP00000251642,9606.ENSP00000256722,9606.ENSP00000264346,9606.ENSP00000302324,9606.ENSP00000306512,9606.ENSP00000328359,9606.ENSP00000342278,9606.ENSP00000351497,9606.ENSP00000353099,9606.ENSP00000359488,9606.ENSP00000359490,9606.ENSP00000359497,9606.ENSP00000359783,9606.ENSP00000368699,9606.ENSP00000436607,9606.ENSP00000477908	CCL2,DHX58,CMPK2,HERC6,RNASE3,CXCL8,DEFA3,OAS2,FCGR2B,HLA-DRB1,GBP5,GBP4,GBP2,IFI44,ISG15,ADM,CCL3
GO Process	GO:0042221	Response to chemical	74	4333	0.27	5.13e-06	9606.ENSP00000225831,9606.ENSP00000228928,9606.ENSP00000230990,9606.ENSP00000239938,9606.ENSP00000241261,9606.ENSP00000242480,9606.ENSP00000245185,9606.ENSP00000248553,9606.ENSP00000252486,9606.ENSP00000252593,9606.ENSP00000252999,9606.ENSP00000254079,9606.ENSP00000255380,9606.ENSP00000256722,9606.ENSP00000257570,9606.ENSP00000259030,9606.ENSP00000259206,9606.ENSP00000263056,9606.ENSP00000263642,…	CCL2,OAS3,HBEGF,EGR1,TNFSF10,EGR2,MT2A,HSPB1,APOE,BST2,LAMA5,PPP1R1B,CHRM3,CMPK2,OASL,RTP4,IL1RN,MAP3K8,IFIH1,KYNU,LAMP3,RAB20,ARID5B,ANK3,CPNE2,ADCY9,CXCR1,S100P,CXCL8,ISG20,FOSL1,EGR3,FFAR3,DEFA3,MX2,HLA-DQA1,OAS2,IFI6,CTSL,FCGR2B,RYR1,HLA-DRB1,XAF1,GBP5,GBP4,GBP2,GBP1,GBP3,MMP9,HLA-DQB1,SPRY2,ISG15,NKX3-1,GPNMB,RSAD2,PLXNA1,SPP1,IRF7,MX1,OAS1,ZFP36L1,PNPT1,HLA-G,MME,PDGFC,FBXO32,NTRK1,SMTNL1,A…
GO Process	GO:0034097	Response to cytokine	44	1101	0.64	1.97e-13	9606.ENSP00000225831,9606.ENSP00000228928,9606.ENSP00000239938,9606.ENSP00000245185,9606.ENSP00000252593,9606.ENSP00000252999,9606.ENSP00000257570,9606.ENSP00000259206,9606.ENSP00000263056,9606.ENSP00000264170,9606.ENSP00000265598,9606.ENSP00000267328,9606.ENSP00000279873,9606.ENSP00000295683,9606.ENSP00000306512,9606.ENSP00000306565,9606.ENSP00000310170,9606.ENSP00000333657,9606.ENSP00000339398,…	CCL2,OAS3,EGR1,MT2A,BST2,LAMA5,OASL,IL1RN,MAP3K8,KYNU,LAMP3,RAB20,ARID5B,CXCR1,CXCL8,ISG20,FOSL1,MX2,HLA-DQA1,OAS2,IFI6,HLA-DRB1,XAF1,GBP5,GBP4,GBP2,GBP1,GBP3,MMP9,HLA-DQB1,SPRY2,ISG15,NKX3-1,RSAD2,IRF7,MX1,OAS1,ZFP36L1,PNPT1,HLA-G,MME,CCL3,CCL3L3,IFI27
GO Process	GO:0009605	Response to external stimulus	63	2310	0.47	8.16e-13	9606.ENSP00000225831,9606.ENSP00000228928,9606.ENSP00000230990,9606.ENSP00000239938,9606.ENSP00000242480,9606.ENSP00000245185,9606.ENSP00000248553,9606.ENSP00000251642,9606.ENSP00000252486,9606.ENSP00000252593,9606.ENSP00000256722,9606.ENSP00000257570,9606.ENSP00000259030,9606.ENSP00000263642,9606.ENSP00000264170,9606.ENSP00000264346,9606.ENSP00000264350,9606.ENSP00000267328,9606.ENSP00000270162,…	CCL2,OAS3,HBEGF,EGR1,EGR2,MT2A,HSPB1,DHX58,APOE,BST2,CMPK2,OASL,RTP4,IFIH1,KYNU,HERC6,HERC5,RAB20,SIK1,CXCR1,RNASE3,CXCL8,ISG20,FOSL1,EGR3,DEFA3,MX2,HLA-DQA1,OAS2,IFI6,TREML4,FCGR2B,HLA-DRB1,XAF1,GBP5,GBP4,GBP2,GBP1,GBP3,IFI44,IFI44L,IFIT5,HLA-DQB1,PADI4,ISG15,GPNMB,RSAD2,PLXNA1,DDX60,SPP1,IRF7,MX1,OAS1,MOV10,HLA-G,NTRK1,ADM,CLEC4C,NR4A1,CCL3,CCL3L3,NR4A3,IFI27
Pfam	PF10421	2-5-oligoadenylate synthetase 1, domain 2, C-terminus	4	4	2.03	0.00053	9606.ENSP00000228928,9606.ENSP00000257570,9606.ENSP00000342278,9606.ENSP00000388001	OAS3,OASL,OAS2,OAS1
Pfam	PF11928	Domain of unknown function (DUF3446)	3	3	2.03	0.0128	9606.ENSP00000239938,9606.ENSP00000242480,9606.ENSP00000318057	EGR1,EGR2,EGR3
GO Process	GO:0010033	Response to organic substance	66	3011	0.37	2.53e-09	9606.ENSP00000225831,9606.ENSP00000228928,9606.ENSP00000239938,9606.ENSP00000241261,9606.ENSP00000242480,9606.ENSP00000245185,9606.ENSP00000248553,9606.ENSP00000252593,9606.ENSP00000252999,9606.ENSP00000254079,9606.ENSP00000255380,9606.ENSP00000256722,9606.ENSP00000257570,9606.ENSP00000259206,9606.ENSP00000263056,9606.ENSP00000263642,9606.ENSP00000264170,9606.ENSP00000265598,9606.ENSP00000267328,…	CCL2,OAS3,EGR1,TNFSF10,EGR2,MT2A,HSPB1,BST2,LAMA5,PPP1R1B,CHRM3,CMPK2,OASL,IL1RN,MAP3K8,IFIH1,KYNU,LAMP3,RAB20,ARID5B,ADCY9,CXCR1,S100P,CXCL8,ISG20,FOSL1,EGR3,FFAR3,DEFA3,MX2,HLA-DQA1,OAS2,IFI6,CTSL,FCGR2B,RYR1,HLA-DRB1,XAF1,GBP5,GBP4,GBP2,GBP1,GBP3,MMP9,HLA-DQB1,SPRY2,ISG15,NKX3-1,RSAD2,SPP1,IRF7,MX1,OAS1,ZFP36L1,PNPT1,HLA-G,MME,PDGFC,FBXO32,NTRK1,ADM,NR4A1,CCL3,CCL3L3,NR4A3,IFI27
GO Process	GO:0051707	Response to other organism	51	1256	0.64	7.46e-16	9606.ENSP00000225831,9606.ENSP00000228928,9606.ENSP00000239938,9606.ENSP00000245185,9606.ENSP00000248553,9606.ENSP00000251642,9606.ENSP00000252593,9606.ENSP00000256722,9606.ENSP00000257570,9606.ENSP00000259030,9606.ENSP00000263642,9606.ENSP00000264170,9606.ENSP00000264346,9606.ENSP00000264350,9606.ENSP00000267328,9606.ENSP00000302324,9606.ENSP00000306512,9606.ENSP00000306565,9606.ENSP00000310170,…	CCL2,OAS3,EGR1,MT2A,HSPB1,DHX58,BST2,CMPK2,OASL,RTP4,IFIH1,KYNU,HERC6,HERC5,RAB20,RNASE3,CXCL8,ISG20,FOSL1,DEFA3,MX2,HLA-DQA1,OAS2,IFI6,TREML4,FCGR2B,HLA-DRB1,XAF1,GBP5,GBP4,GBP2,GBP1,GBP3,IFI44,IFI44L,IFIT5,HLA-DQB1,PADI4,ISG15,RSAD2,DDX60,IRF7,MX1,OAS1,MOV10,HLA-G,ADM,CLEC4C,CCL3,CCL3L3,IFI27
GO Process	GO:0050896	Response to stimulus	115	8046	0.19	4.91e-07	9606.ENSP00000035383,9606.ENSP00000225831,9606.ENSP00000228928,9606.ENSP00000230990,9606.ENSP00000239938,9606.ENSP00000241261,9606.ENSP00000242480,9606.ENSP00000245185,9606.ENSP00000248553,9606.ENSP00000251642,9606.ENSP00000252486,9606.ENSP00000252593,9606.ENSP00000252999,9606.ENSP00000254079,9606.ENSP00000255380,9606.ENSP00000256722,9606.ENSP00000257570,9606.ENSP00000259030,9606.ENSP00000259206,…	LRRC7,CCL2,OAS3,HBEGF,EGR1,TNFSF10,EGR2,MT2A,HSPB1,DHX58,APOE,BST2,LAMA5,PPP1R1B,CHRM3,CMPK2,OASL,RTP4,IL1RN,LGALS3BP,MAP3K8,IFIH1,KYNU,HERC6,HERC5,LAMP3,RAB20,SECTM1,SIK1,ARID5B,ANK3,DGKI,CPNE2,SCGB3A1,GRASP,ADCY9,CXCR1,S100P,RRAD,RNASE3,SIRPG,CXCL8,ISG20,FOSL1,CD7,EGR3,FFAR3,DEFA3,GTF2H2,FUT10,MX2,HLA-DQA1,OAS2,IFI6,TREML4,CTSL,FCGR2B,RYR1,HLA-DRB1,XAF1,G0S2,GBP5,GBP4,GBP2,GBP1,GBP3,IFI44,IFI44…
GO Process	GO:0006950	Response to stress	66	3485	0.31	9.27e-07	9606.ENSP00000225831,9606.ENSP00000228928,9606.ENSP00000230990,9606.ENSP00000239938,9606.ENSP00000245185,9606.ENSP00000248553,9606.ENSP00000251642,9606.ENSP00000252486,9606.ENSP00000252593,9606.ENSP00000257570,9606.ENSP00000259030,9606.ENSP00000259206,9606.ENSP00000262776,9606.ENSP00000263056,9606.ENSP00000263642,9606.ENSP00000264170,9606.ENSP00000264350,9606.ENSP00000267328,9606.ENSP00000288490,…	CCL2,OAS3,HBEGF,EGR1,MT2A,HSPB1,DHX58,APOE,BST2,OASL,RTP4,IL1RN,LGALS3BP,MAP3K8,IFIH1,KYNU,HERC5,RAB20,DGKI,RNASE3,CXCL8,ISG20,FOSL1,FFAR3,DEFA3,GTF2H2,FUT10,MX2,HLA-DQA1,OAS2,IFI6,TREML4,FCGR2B,RYR1,HLA-DRB1,XAF1,GBP5,GBP4,GBP2,GBP1,GBP3,IFI44L,IFIT5,MMP9,HLA-DQB1,PADI4,ISG15,NKX3-1,RSAD2,DDX60,SPP1,IRF7,MX1,OAS1,ZFP36L1,MOV10,PNPT1,HLA-G,GTSE1,NTRK1,ADM,CLEC4C,CCL3,CCL3L3,NR4A3,IFI27
SMART	SM00407	Immunoglobulin C-Type	5	38	1.15	0.0323	9606.ENSP00000305529,9606.ENSP00000339398,9606.ENSP00000353099,9606.ENSP00000364080,9606.ENSP00000412927	SIRPG,HLA-DQA1,HLA-DRB1,HLA-DQB1,HLA-G
KEGG	hsa05323	Rheumatoid arthritis	6	85	0.88	0.016	9606.ENSP00000225831,9606.ENSP00000306512,9606.ENSP00000339398,9606.ENSP00000345344,9606.ENSP00000477908,9606.ENSP00000480558	CCL2,CXCL8,HLA-DQA1,CTSL,CCL3,CCL3L3
WikiPathways	WP3624	Lung fibrosis	6	63	1.01	0.0132	9606.ENSP00000225831,9606.ENSP00000245185,9606.ENSP00000306512,9606.ENSP00000361405,9606.ENSP00000378517,9606.ENSP00000477908	CCL2,MT2A,CXCL8,MMP9,SPP1,CCL3
KEGG	hsa04622	RIG-I-like receptor signaling pathway	5	70	0.89	0.0302	9606.ENSP00000251642,9606.ENSP00000263642,9606.ENSP00000306512,9606.ENSP00000368699,9606.ENSP00000380697	DHX58,IFIH1,CXCL8,ISG15,IRF7
WikiPathways	WP4868	Type I interferon induction and signaling during SARS-CoV-2 infection	6	31	1.32	0.00068	9606.ENSP00000228928,9606.ENSP00000263642,9606.ENSP00000342278,9606.ENSP00000342570,9606.ENSP00000380697,9606.ENSP00000388001	OAS3,IFIH1,OAS2,TREML4,IRF7,OAS1
WikiPathways	WP5039	SARS-CoV-2 innate immunity evasion and cell-specific immune response	6	66	0.99	0.0132	9606.ENSP00000225831,9606.ENSP00000251642,9606.ENSP00000306512,9606.ENSP00000380697,9606.ENSP00000381601,9606.ENSP00000477908	CCL2,DHX58,CXCL8,IRF7,MX1,CCL3
UniProt Keywords	KW-0964	Secreted	32	1818	0.28	0.0374	9606.ENSP00000200676,9606.ENSP00000221399,9606.ENSP00000225831,9606.ENSP00000230990,9606.ENSP00000241261,9606.ENSP00000252486,9606.ENSP00000252999,9606.ENSP00000253109,9606.ENSP00000259206,9606.ENSP00000262776,9606.ENSP00000268150,9606.ENSP00000269389,9606.ENSP00000292641,9606.ENSP00000297668,9606.ENSP00000302324,9606.ENSP00000306512,9606.ENSP00000328359,9606.ENSP00000332511,9606.ENSP00000342570,…	CETP,TULP2,CCL2,HBEGF,TNFSF10,APOE,LAMA5,ANGPTL6,IL1RN,LGALS3BP,MFGE8,SECTM1,SCGB3A1,CNTNAP3,RNASE3,CXCL8,DEFA3,OLFML1,TREML4,GBP1,MMP9,COL15A1,ISG15,SPP1,LIPN,OAS1,HLA-G,PLTP,PDGFC,ADM,CCL3,CCL3L3
UniProt Keywords	KW-0732	Signal	49	3233	0.21	0.0341	9606.ENSP00000200676,9606.ENSP00000225831,9606.ENSP00000230990,9606.ENSP00000252486,9606.ENSP00000252999,9606.ENSP00000253109,9606.ENSP00000259206,9606.ENSP00000262776,9606.ENSP00000264852,9606.ENSP00000265598,9606.ENSP00000268150,9606.ENSP00000269389,9606.ENSP00000292641,9606.ENSP00000297668,9606.ENSP00000302324,9606.ENSP00000305529,9606.ENSP00000306512,9606.ENSP00000312027,9606.ENSP00000322276,…	CETP,CCL2,HBEGF,APOE,LAMA5,ANGPTL6,IL1RN,LGALS3BP,SIDT1,LAMP3,MFGE8,SECTM1,SCGB3A1,CNTNAP3,RNASE3,SIRPG,CXCL8,CD7,VNN2,DEFA3,OLFML1,HLA-DQA1,TREML4,CTSL,FCGR2B,HLA-DRB1,MMP9,HLA-DQB1,COL15A1,GPNMB,PLXNA1,SPP1,NOMO3,LIPN,MXRA8,MDGA1,HLA-G,PLTP,PTPRG,SORCS2,PDGFC,CDH18,LY6E,NTRK1,SLC24A4,ADM,VNN3,CCL3,CCL3L3
GO Process	GO:0007165	Signal transduction	84	4876	0.27	1.92e-07	9606.ENSP00000035383,9606.ENSP00000225831,9606.ENSP00000228928,9606.ENSP00000230990,9606.ENSP00000239938,9606.ENSP00000241261,9606.ENSP00000245185,9606.ENSP00000248553,9606.ENSP00000252486,9606.ENSP00000252593,9606.ENSP00000252999,9606.ENSP00000254079,9606.ENSP00000255380,9606.ENSP00000257570,9606.ENSP00000259206,9606.ENSP00000262776,9606.ENSP00000263056,9606.ENSP00000263642,9606.ENSP00000267328,…	LRRC7,CCL2,OAS3,HBEGF,EGR1,TNFSF10,MT2A,HSPB1,APOE,BST2,LAMA5,PPP1R1B,CHRM3,OASL,IL1RN,LGALS3BP,MAP3K8,IFIH1,RAB20,SECTM1,SIK1,ARID5B,ANK3,DGKI,SCGB3A1,GRASP,ADCY9,CXCR1,RRAD,SIRPG,CXCL8,ISG20,CD7,FFAR3,DEFA3,MX2,HLA-DQA1,OAS2,IFI6,CTSL,FCGR2B,RYR1,HLA-DRB1,XAF1,G0S2,GBP2,GBP1,MMP9,HLA-DQB1,COL15A1,ISG15,KBTBD7,NKX3-1,GPNMB,RSAD2,ARHGAP5,CIT,PLXNA1,SPP1,CARD11,IRF7,MX1,RASGRP3,PRR5,OAS1,ZFP36L1,M…
GO Process	GO:0023052	Signaling	86	5239	0.25	9.27e-07	9606.ENSP00000035383,9606.ENSP00000225831,9606.ENSP00000228928,9606.ENSP00000230990,9606.ENSP00000239938,9606.ENSP00000241261,9606.ENSP00000245185,9606.ENSP00000248553,9606.ENSP00000252486,9606.ENSP00000252593,9606.ENSP00000252999,9606.ENSP00000254079,9606.ENSP00000255380,9606.ENSP00000257570,9606.ENSP00000259206,9606.ENSP00000262776,9606.ENSP00000263056,9606.ENSP00000263642,9606.ENSP00000267328,…	LRRC7,CCL2,OAS3,HBEGF,EGR1,TNFSF10,MT2A,HSPB1,APOE,BST2,LAMA5,PPP1R1B,CHRM3,OASL,IL1RN,LGALS3BP,MAP3K8,IFIH1,RAB20,SECTM1,SIK1,OTOF,ARID5B,ANK3,DGKI,SCGB3A1,GRASP,ADCY9,CXCR1,RRAD,SIRPG,CXCL8,ISG20,CD7,EGR3,FFAR3,DEFA3,MX2,HLA-DQA1,OAS2,IFI6,CTSL,FCGR2B,RYR1,HLA-DRB1,XAF1,G0S2,GBP2,GBP1,MMP9,HLA-DQB1,COL15A1,ISG15,KBTBD7,NKX3-1,GPNMB,RSAD2,ARHGAP5,CIT,PLXNA1,SPP1,CARD11,IRF7,MX1,RASGRP3,PRR5,OAS1…
Reactome	HSA-9006934	Signaling by Receptor Tyrosine Kinases	15	502	0.51	0.0211	9606.ENSP00000230990,9606.ENSP00000239938,9606.ENSP00000242480,9606.ENSP00000248553,9606.ENSP00000252486,9606.ENSP00000252999,9606.ENSP00000299759,9606.ENSP00000310170,9606.ENSP00000318057,9606.ENSP00000361405,9606.ENSP00000366306,9606.ENSP00000378517,9606.ENSP00000384848,9606.ENSP00000422464,9606.ENSP00000431418	HBEGF,EGR1,EGR2,HSPB1,APOE,LAMA5,RRAD,FOSL1,EGR3,MMP9,SPRY2,SPP1,PRR5,PDGFC,NTRK1
KEGG	hsa04620	Toll-like receptor signaling pathway	6	101	0.81	0.0257	9606.ENSP00000263056,9606.ENSP00000306512,9606.ENSP00000378517,9606.ENSP00000380697,9606.ENSP00000477908,9606.ENSP00000480558	MAP3K8,CXCL8,SPP1,IRF7,CCL3,CCL3L3
WikiPathways	WP4880	Host-pathogen interaction of human coronaviruses - interferon induction	4	33	1.12	0.0345	9606.ENSP00000228928,9606.ENSP00000263642,9606.ENSP00000342278,9606.ENSP00000388001	OAS3,IFIH1,OAS2,OAS1
WikiPathways	WP4891	COVID-19 adverse outcome pathway	3	15	1.33	0.04	9606.ENSP00000225831,9606.ENSP00000306512,9606.ENSP00000477908	CCL2,CXCL8,CCL3
WikiPathways	WP5110	Familial hyperlipidemia type 3	3	13	1.4	0.0345	9606.ENSP00000200676,9606.ENSP00000252486,9606.ENSP00000417138	CETP,APOE,PLTP
WikiPathways	WP619	Type II interferon signaling (IFNG)	4	37	1.07	0.04	9606.ENSP00000342513,9606.ENSP00000359504,9606.ENSP00000368699,9606.ENSP00000388001	IFI6,GBP1,ISG15,OAS1
KEGG	hsa04061	Viral protein interaction with cytokine and cytokine receptor	6	96	0.83	0.0239	9606.ENSP00000225831,9606.ENSP00000241261,9606.ENSP00000295683,9606.ENSP00000306512,9606.ENSP00000477908,9606.ENSP00000480558	CCL2,TNFSF10,CXCR1,CXCL8,CCL3,CCL3L3

## Sheet: Neutrophil_Enrichment_All
#category	term ID	term description	observed gene count	background gene count	strength	false discovery rate	matching proteins in your network (IDs)	matching proteins in your network (labels)
STRING clusters	CL:19391	Interferon alpha/beta signaling, and ISG15-protein conjugation	6	36	1.47	0.00028	9606.ENSP00000215794,9606.ENSP00000264346,9606.ENSP00000359787,9606.ENSP00000368699,9606.ENSP00000377344,9606.ENSP00000483430	USP18,HERC6,IFI44L,ISG15,DDX60,IFI27
STRING clusters	CL:19437	Mixed, incl. isg15-protein conjugation, and interferon-induced protein 44 family	5	13	1.83	0.00019	9606.ENSP00000215794,9606.ENSP00000264346,9606.ENSP00000359787,9606.ENSP00000368699,9606.ENSP00000377344	USP18,HERC6,IFI44L,ISG15,DDX60
STRING clusters	CL:19438	Mixed, incl. interferon-induced protein 44 family, and receptor-transporting protein 4	3	7	1.88	0.0103	9606.ENSP00000264346,9606.ENSP00000359787,9606.ENSP00000377344	HERC6,IFI44L,DDX60
DISEASES	DOID:16	Integumentary system disease	13	534	0.63	0.0419	9606.ENSP00000167586,9606.ENSP00000252242,9606.ENSP00000255006,9606.ENSP00000263461,9606.ENSP00000265896,9606.ENSP00000323856,9606.ENSP00000353099,9606.ENSP00000364114,9606.ENSP00000367494,9606.ENSP00000369317,9606.ENSP00000370713,9606.ENSP00000377508,9606.ENSP00000379891	KRT14,KRT5,RIN2,WDR11,SQLE,PLEC,HLA-DRB1,HLA-DRB5,SPIRE2,KRT6A,ADARB2,JUP,AP1S3
STRING clusters	CL:36169	Focal nonepidermolytic palmoplantar keratoderma, and Epidermolysis bullosa simplex Dowling-Meara type	3	5	2.02	0.0062	9606.ENSP00000167586,9606.ENSP00000252242,9606.ENSP00000369317	KRT14,KRT5,KRT6A
DISEASES	DOID:4644	Epidermolysis bullosa simplex	3	5	2.02	0.0419	9606.ENSP00000167586,9606.ENSP00000252242,9606.ENSP00000323856	KRT14,KRT5,PLEC
Monarch HPO	HP:0001805	Onychogryposis	4	24	1.47	0.0293	9606.ENSP00000167586,9606.ENSP00000252242,9606.ENSP00000323856,9606.ENSP00000369317	KRT14,KRT5,PLEC,KRT6A
Monarch HPO	HP:0007446	Palmoplantar blistering	4	11	1.81	0.0124	9606.ENSP00000167586,9606.ENSP00000252242,9606.ENSP00000323856,9606.ENSP00000369317	KRT14,KRT5,PLEC,KRT6A
Monarch HPO	HP:0007585	Skin fragility with non-scarring blistering	3	4	2.12	0.0293	9606.ENSP00000167586,9606.ENSP00000252242,9606.ENSP00000323856	KRT14,KRT5,PLEC
Monarch HPO	HP:0007589	Aplasia cutis congenita on trunk or limbs	3	5	2.02	0.0293	9606.ENSP00000167586,9606.ENSP00000252242,9606.ENSP00000323856	KRT14,KRT5,PLEC
DISEASES	DOID:37	Skin disease	12	481	0.64	0.0419	9606.ENSP00000167586,9606.ENSP00000252242,9606.ENSP00000255006,9606.ENSP00000265896,9606.ENSP00000323856,9606.ENSP00000353099,9606.ENSP00000364114,9606.ENSP00000367494,9606.ENSP00000369317,9606.ENSP00000370713,9606.ENSP00000377508,9606.ENSP00000379891	KRT14,KRT5,RIN2,SQLE,PLEC,HLA-DRB1,HLA-DRB5,SPIRE2,KRT6A,ADARB2,JUP,AP1S3
Monarch HPO	HP:0008404	Nail dystrophy	7	115	1.03	0.0293	9606.ENSP00000167586,9606.ENSP00000252242,9606.ENSP00000323856,9606.ENSP00000369317,9606.ENSP00000377508,9606.ENSP00000379891,9606.ENSP00000386306	KRT14,KRT5,PLEC,KRT6A,JUP,AP1S3,SCN9A
Monarch HPO	HP:0200041	Skin erosion	4	21	1.53	0.0293	9606.ENSP00000167586,9606.ENSP00000252242,9606.ENSP00000323856,9606.ENSP00000377508	KRT14,KRT5,PLEC,JUP

## Sheet: Neutrophil_Enrichment_Up
Table S6. Gene enrichment analyses of up- and down-regulated genes between cures and TF in inate cells
#category	term ID	term description	observed gene count	background gene count	strength	false discovery rate	matching proteins in your network (IDs)	matching proteins in your network (labels)
STRING clusters	CL:19437	Mixed, incl. isg15-protein conjugation, and interferon-induced protein 44 family	5	13	1.96	4.17e-05	9606.ENSP00000215794,9606.ENSP00000264346,9606.ENSP00000359787,9606.ENSP00000368699,9606.ENSP00000377344	USP18,HERC6,IFI44L,ISG15,DDX60
STRING clusters	CL:19391	Interferon alpha/beta signaling, and ISG15-protein conjugation	6	36	1.6	4.64e-05	9606.ENSP00000215794,9606.ENSP00000264346,9606.ENSP00000359787,9606.ENSP00000368699,9606.ENSP00000377344,9606.ENSP00000483430	USP18,HERC6,IFI44L,ISG15,DDX60,IFI27
STRING clusters	CL:19438	Mixed, incl. interferon-induced protein 44 family, and receptor-transporting protein 4	3	7	2.01	0.0047	9606.ENSP00000264346,9606.ENSP00000359787,9606.ENSP00000377344	HERC6,IFI44L,DDX60

## Sheet: Neutrophil_Enrichment_Down
#category	term ID	term description	observed gene count	background gene count	strength	false discovery rate	matching proteins in your network (IDs)	matching proteins in your network (labels)
DISEASES	DOID:37	Skin disease	7	481	0.99	0.0110	9606.ENSP00000167586,9606.ENSP00000252242,9606.ENSP00000323856,9606.ENSP00000353099,9606.ENSP00000364114,9606.ENSP00000369317,9606.ENSP00000370713	KRT14,KRT5,PLEC,HLA-DRB1,HLA-DRB5,KRT6A,ADARB2
GO Function	GO:0005200	Structural constituent of cytoskeleton	5	104	1.51	0.0017	9606.ENSP00000167586,9606.ENSP00000252242,9606.ENSP00000323856,9606.ENSP00000353099,9606.ENSP00000369317	KRT14,KRT5,PLEC,HLA-DRB1,KRT6A
GO Component	GO:0045111	Intermediate filament cytoskeleton	5	237	1.15	0.0437	9606.ENSP00000167586,9606.ENSP00000252242,9606.ENSP00000323856,9606.ENSP00000353099,9606.ENSP00000369317	KRT14,KRT5,PLEC,HLA-DRB1,KRT6A
COMPARTMENTS	GOCC:0045111	Intermediate filament cytoskeleton	5	116	1.46	0.0020	9606.ENSP00000167586,9606.ENSP00000252242,9606.ENSP00000323856,9606.ENSP00000353099,9606.ENSP00000369317	KRT14,KRT5,PLEC,HLA-DRB1,KRT6A
COMPARTMENTS	GOCC:0005882	Intermediate filament	4	73	1.57	0.0037	9606.ENSP00000167586,9606.ENSP00000252242,9606.ENSP00000353099,9606.ENSP00000369317	KRT14,KRT5,HLA-DRB1,KRT6A
Monarch HPO	HP:0000982	Palmoplantar keratoderma	4	147	1.26	0.0186	9606.ENSP00000167586,9606.ENSP00000252242,9606.ENSP00000323856,9606.ENSP00000369317	KRT14,KRT5,PLEC,KRT6A
Monarch HPO	HP:0001231	Abnormal fingernail morphology	4	157	1.24	0.0215	9606.ENSP00000167586,9606.ENSP00000252242,9606.ENSP00000323856,9606.ENSP00000369317	KRT14,KRT5,PLEC,KRT6A
Monarch HPO	HP:0001596	Alopecia	4	187	1.16	0.0334	9606.ENSP00000167586,9606.ENSP00000252242,9606.ENSP00000323856,9606.ENSP00000369317	KRT14,KRT5,PLEC,KRT6A
Monarch HPO	HP:0001805	Onychogryposis	4	24	2.05	0.00038	9606.ENSP00000167586,9606.ENSP00000252242,9606.ENSP00000323856,9606.ENSP00000369317	KRT14,KRT5,PLEC,KRT6A
Monarch HPO	HP:0002164	Nail dysplasia	4	145	1.27	0.0181	9606.ENSP00000167586,9606.ENSP00000252242,9606.ENSP00000323856,9606.ENSP00000369317	KRT14,KRT5,PLEC,KRT6A
Monarch HPO	HP:0007446	Palmoplantar blistering	4	11	2.39	5.18e-05	9606.ENSP00000167586,9606.ENSP00000252242,9606.ENSP00000323856,9606.ENSP00000369317	KRT14,KRT5,PLEC,KRT6A
Monarch HPO	HP:0008404	Nail dystrophy	4	115	1.37	0.0123	9606.ENSP00000167586,9606.ENSP00000252242,9606.ENSP00000323856,9606.ENSP00000369317	KRT14,KRT5,PLEC,KRT6A
Monarch HPO	HP:0011830	Abnormal oral mucosa morphology	4	195	1.14	0.0371	9606.ENSP00000167586,9606.ENSP00000252242,9606.ENSP00000323856,9606.ENSP00000369317	KRT14,KRT5,PLEC,KRT6A
TISSUES	BTO:0001049	Pharynx	3	68	1.47	0.0371	9606.ENSP00000167586,9606.ENSP00000252242,9606.ENSP00000369317	KRT14,KRT5,KRT6A
TISSUES	BTO:0001208	Larynx	3	32	1.8	0.0352	9606.ENSP00000167586,9606.ENSP00000252242,9606.ENSP00000369317	KRT14,KRT5,KRT6A
STRING clusters	CL:36169	Focal nonepidermolytic palmoplantar keratoderma, and Epidermolysis bullosa simplex Dowling-Meara type	3	5	2.61	0.00074	9606.ENSP00000167586,9606.ENSP00000252242,9606.ENSP00000369317	KRT14,KRT5,KRT6A
DISEASES	DOID:161	Keratosis	3	58	1.54	0.0375	9606.ENSP00000167586,9606.ENSP00000252242,9606.ENSP00000369317	KRT14,KRT5,KRT6A
DISEASES	DOID:4644	Epidermolysis bullosa simplex	3	5	2.61	0.00071	9606.ENSP00000167586,9606.ENSP00000252242,9606.ENSP00000323856	KRT14,KRT5,PLEC
GO Process	GO:0031581	Hemidesmosome assembly	3	12	2.23	0.0168	9606.ENSP00000167586,9606.ENSP00000252242,9606.ENSP00000323856	KRT14,KRT5,PLEC
COMPARTMENTS	GOCC:0045095	Keratin filament	3	16	2.1	0.0032	9606.ENSP00000167586,9606.ENSP00000252242,9606.ENSP00000369317	KRT14,KRT5,KRT6A
Monarch HPO	HP:0001034	Hypermelanotic macule	3	74	1.44	0.0371	9606.ENSP00000167586,9606.ENSP00000252242,9606.ENSP00000323856	KRT14,KRT5,PLEC
Monarch HPO	HP:0001056	Milia	3	20	2.01	0.0046	9606.ENSP00000167586,9606.ENSP00000252242,9606.ENSP00000323856	KRT14,KRT5,PLEC
Monarch HPO	HP:0001075	Atrophic scars	3	35	1.76	0.0116	9606.ENSP00000167586,9606.ENSP00000252242,9606.ENSP00000323856	KRT14,KRT5,PLEC
Monarch HPO	HP:0001609	Hoarse voice	3	72	1.45	0.0349	9606.ENSP00000167586,9606.ENSP00000252242,9606.ENSP00000369317	KRT14,KRT5,KRT6A
Monarch HPO	HP:0003341	Subepidermal blistering with cleavage in the lamina lucida	3	9	2.35	0.0013	9606.ENSP00000167586,9606.ENSP00000252242,9606.ENSP00000323856	KRT14,KRT5,PLEC
Monarch HPO	HP:0006297	Enamel hypoplasia	3	82	1.39	0.0478	9606.ENSP00000167586,9606.ENSP00000252242,9606.ENSP00000323856	KRT14,KRT5,PLEC
Monarch HPO	HP:0007585	Skin fragility with non-scarring blistering	3	4	2.7	0.00038	9606.ENSP00000167586,9606.ENSP00000252242,9606.ENSP00000323856	KRT14,KRT5,PLEC
Monarch HPO	HP:0007589	Aplasia cutis congenita on trunk or limbs	3	5	2.61	0.00040	9606.ENSP00000167586,9606.ENSP00000252242,9606.ENSP00000323856	KRT14,KRT5,PLEC
Monarch HPO	HP:0012514	Lower limb pain	3	32	1.8	0.0108	9606.ENSP00000167586,9606.ENSP00000252242,9606.ENSP00000369317	KRT14,KRT5,KRT6A
Monarch HPO	HP:0020073	Hypopigmented macule	3	14	2.16	0.0022	9606.ENSP00000167586,9606.ENSP00000252242,9606.ENSP00000323856	KRT14,KRT5,PLEC
Monarch HPO	HP:0200034	Papule	3	64	1.5	0.0265	9606.ENSP00000167586,9606.ENSP00000252242,9606.ENSP00000323856	KRT14,KRT5,PLEC
Monarch HPO	HP:0200041	Skin erosion	3	21	1.98	0.0048	9606.ENSP00000167586,9606.ENSP00000252242,9606.ENSP00000323856	KRT14,KRT5,PLEC
Monarch HPO	HP:0200097	Oral mucosal blisters	3	11	2.26	0.0013	9606.ENSP00000167586,9606.ENSP00000252242,9606.ENSP00000323856	KRT14,KRT5,PLEC
Reactome	HSA-446107	Type I hemidesmosome assembly	3	11	2.26	0.0023	9606.ENSP00000167586,9606.ENSP00000252242,9606.ENSP00000323856	KRT14,KRT5,PLEC
UniProt Keywords	KW-0263	Epidermolysis bullosa	3	16	2.1	0.0019	9606.ENSP00000167586,9606.ENSP00000252242,9606.ENSP00000323856	KRT14,KRT5,PLEC
TISSUES	BTO:0000939	Basal cell	2	3	2.65	0.0352	9606.ENSP00000167586,9606.ENSP00000252242	KRT14,KRT5
TISSUES	BTO:0002309	Myoepithelial cell	2	4	2.53	0.0352	9606.ENSP00000167586,9606.ENSP00000252242	KRT14,KRT5
TISSUES	BTO:0002922	Bronchial epithelial cell	2	7	2.29	0.0352	9606.ENSP00000167586,9606.ENSP00000252242	KRT14,KRT5
DISEASES	DOID:0060735	Epidermolysis bullosa simplex dowling-meara type	2	2	2.83	0.0110	9606.ENSP00000167586,9606.ENSP00000252242	KRT14,KRT5
DISEASES	DOID:6498	Seborrheic keratosis	2	6	2.35	0.0321	9606.ENSP00000167586,9606.ENSP00000252242	KRT14,KRT5
DISEASES	DOID:7039	Borst-Jadassohn intraepidermal carcinoma	2	3	2.65	0.0132	9606.ENSP00000167586,9606.ENSP00000252242	KRT14,KRT5
DISEASES	DOID:8691	Mycosis fungoides	2	6	2.35	0.0321	9606.ENSP00000167586,9606.ENSP00000252242	KRT14,KRT5
Monarch HPO	HP:0003489	Acute episodes of neuropathic symptoms	2	5	2.43	0.0151	9606.ENSP00000167586,9606.ENSP00000252242	KRT14,KRT5
Monarch HPO	HP:0005585	Spotty hyperpigmentation	2	8	2.23	0.0215	9606.ENSP00000167586,9606.ENSP00000252242	KRT14,KRT5
Monarch HPO	HP:0005590	Spotty hypopigmentation	2	8	2.23	0.0215	9606.ENSP00000167586,9606.ENSP00000252242	KRT14,KRT5
Monarch HPO	HP:0007427	Reticulated skin pigmentation	2	5	2.43	0.0151	9606.ENSP00000167586,9606.ENSP00000252242	KRT14,KRT5
Monarch HPO	HP:0007438	Mottled pigmentation of the trunk and proximal extremities	2	2	2.83	0.0090	9606.ENSP00000167586,9606.ENSP00000252242	KRT14,KRT5
Monarch HPO	HP:0007483	Depigmentation/hyperpigmentation of skin	2	5	2.43	0.0151	9606.ENSP00000167586,9606.ENSP00000252242	KRT14,KRT5
Monarch HPO	HP:0007494	Discrete 2 to 5-mm hyper- and hypopigmented macules	2	2	2.83	0.0090	9606.ENSP00000167586,9606.ENSP00000252242	KRT14,KRT5
Monarch HPO	HP:0007497	Focal friction-related palmoplantar hyperkeratosis	2	3	2.65	0.0116	9606.ENSP00000167586,9606.ENSP00000252242	KRT14,KRT5
Monarch HPO	HP:0007530	Punctate palmoplantar hyperkeratosis	2	4	2.53	0.0136	9606.ENSP00000167586,9606.ENSP00000252242	KRT14,KRT5
Monarch HPO	HP:0007599	Generalized reticulate brown pigmentation	2	3	2.65	0.0116	9606.ENSP00000167586,9606.ENSP00000252242	KRT14,KRT5
Monarch HPO	HP:0008401	Onychogryposis of toenails	2	7	2.29	0.0197	9606.ENSP00000323856,9606.ENSP00000369317	PLEC,KRT6A
Monarch HPO	HP:0009719	Hypomelanotic macule	2	5	2.43	0.0151	9606.ENSP00000167586,9606.ENSP00000252242	KRT14,KRT5
Monarch HPO	HP:0010298	Smooth tongue	2	4	2.53	0.0136	9606.ENSP00000167586,9606.ENSP00000252242	KRT14,KRT5
Monarch HPO	HP:0012513	Upper limb pain	2	7	2.29	0.0197	9606.ENSP00000167586,9606.ENSP00000252242	KRT14,KRT5
Monarch HPO	HP:0025238	Foot pain	2	4	2.53	0.0136	9606.ENSP00000167586,9606.ENSP00000252242	KRT14,KRT5
Monarch HPO	HP:0030350	Erythematous papule	2	6	2.35	0.0172	9606.ENSP00000167586,9606.ENSP00000252242	KRT14,KRT5
Monarch HPO	HP:0031045	Acral blistering	2	6	2.35	0.0172	9606.ENSP00000252242,9606.ENSP00000323856	KRT5,PLEC
Monarch HPO	HP:0031446	Erosion of oral mucosa	2	8	2.23	0.0215	9606.ENSP00000167586,9606.ENSP00000252242	KRT14,KRT5
Monarch HPO	HP:0031464	Genital blistering	2	4	2.53	0.0136	9606.ENSP00000167586,9606.ENSP00000252242	KRT14,KRT5
Monarch HPO	HP:0045059	Hyperkeratotic papule	2	4	2.53	0.0136	9606.ENSP00000167586,9606.ENSP00000252242	KRT14,KRT5

## Sheet: Eosinophil_Enrichment_Up
#category	term ID	term description	observed gene count	background gene count	strength	fals^ discov^ry rat^	matching proteins in your network (IDs)	matching proteins in your network (labels)
TISSUES	BTO:0001044	Phagocyte	8	117	1.07	0.0012	9606.ENSP00000228928,9606.ENSP00000252486,9606.ENSP00000257570,9606.ENSP00000306512,9606.ENSP00000322276,9606.ENSP00000361405,9606.ENSP00000428572,9606.ENSP00000440594	OAS3,OASL,OAS2,OAS1
STRING clusters	CL:18848	Mixed, incl. immunoregulatory interactions between a lymphoid and a non-lymphoid cell, and aig1-type guanine nucleotide-binding (g) domain	7	120	1	0.0028	9606.ENSP00000252593,9606.ENSP00000265598,9606.ENSP00000269389,9606.ENSP00000312027,9606.ENSP00000412927,9606.ENSP00000418525,9606.ENSP00000440428	OAS3,OASL,OAS2,OAS1
STRING clusters	CL:18982	Mixed, incl. histiocytosis, and hematopoietic cell lineage	6	35	1.47	4.53e-05	9606.ENSP00000252593,9606.ENSP00000265598,9606.ENSP00000269389,9606.ENSP00000312027,9606.ENSP00000418525,9606.ENSP00000440428	OAS3,OASL,OAS2,OAS1
STRING clusters	CL:19382	Mixed, incl. interferon alpha/beta signaling, and negative regulators of ddx58/ifih1 signaling	28	67	1.86	1.51e-37	9606.ENSP00000215794,9606.ENSP00000228928,9606.ENSP00000251642,9606.ENSP00000257570,9606.ENSP00000259030,9606.ENSP00000263642,9606.ENSP00000264346,9606.ENSP00000264350,9606.ENSP00000318982,9606.ENSP00000333657,9606.ENSP00000342278,9606.ENSP00000342513,9606.ENSP00000354822,9606.ENSP00000359488,9606.ENSP00000359490,9606.ENSP00000359497,9606.ENSP00000359504,9606.ENSP00000359512,9606.ENSP00000359783,…	OAS3,OASL,OAS2,OAS1
STRING clusters	CL:19385	Interferon alpha/beta signaling, and Negative regulators of DDX58/IFIH1 signaling	27	61	1.88	5.47e-37	9606.ENSP00000215794,9606.ENSP00000228928,9606.ENSP00000251642,9606.ENSP00000257570,9606.ENSP00000259030,9606.ENSP00000263642,9606.ENSP00000264346,9606.ENSP00000264350,9606.ENSP00000318982,9606.ENSP00000333657,9606.ENSP00000342278,9606.ENSP00000342513,9606.ENSP00000354822,9606.ENSP00000359490,9606.ENSP00000359497,9606.ENSP00000359504,9606.ENSP00000359512,9606.ENSP00000359783,9606.ENSP00000359787,…	OAS3,OASL,OAS2,OAS1
STRING clusters	CL:19391	Interferon alpha/beta signaling, and ISG15-protein conjugation	23	36	2.04	2.94e-34	9606.ENSP00000215794,9606.ENSP00000228928,9606.ENSP00000251642,9606.ENSP00000257570,9606.ENSP00000259030,9606.ENSP00000264346,9606.ENSP00000264350,9606.ENSP00000333657,9606.ENSP00000342278,9606.ENSP00000342513,9606.ENSP00000354822,9606.ENSP00000359497,9606.ENSP00000359504,9606.ENSP00000359783,9606.ENSP00000359787,9606.ENSP00000360860,9606.ENSP00000368699,9606.ENSP00000371471,9606.ENSP00000377344,…	OAS3,OASL,OAS2,OAS1
STRING clusters	CL:19394	Interferon alpha/beta signaling	13	21	2.03	1.97e-18	9606.ENSP00000228928,9606.ENSP00000257570,9606.ENSP00000333657,9606.ENSP00000342278,9606.ENSP00000342513,9606.ENSP00000354822,9606.ENSP00000359497,9606.ENSP00000360860,9606.ENSP00000371471,9606.ENSP00000380697,9606.ENSP00000381601,9606.ENSP00000388001,9606.ENSP00000483430	OAS3,OAS2,OAS1
STRING clusters	CL:19397	Microphthalmia with limb anomalies, and Interferon alpha/beta signaling	11	16	2.08	9.32e-16	9606.ENSP00000228928,9606.ENSP00000257570,9606.ENSP00000333657,9606.ENSP00000342278,9606.ENSP00000342513,9606.ENSP00000354822,9606.ENSP00000360860,9606.ENSP00000371471,9606.ENSP00000380697,9606.ENSP00000381601,9606.ENSP00000388001	RTP4,HERC6,GBP1,IFI44,IFI44L,DDX60
STRING clusters	CL:19399	Mixed, incl. 2-5-oligoadenylate synthetase activity, and nephropathia epidemica	7	11	2.04	2.34e-09	9606.ENSP00000228928,9606.ENSP00000333657,9606.ENSP00000342278,9606.ENSP00000342513,9606.ENSP00000354822,9606.ENSP00000371471,9606.ENSP00000388001	USP18,DHX58,RTP4,HERC6,HERC5,GBP1,IFI44,IFI44L,ISG15,DDX60
STRING clusters	CL:19437	Mixed, incl. isg15-protein conjugation, and interferon-induced protein 44 family	10	13	2.12	1.41e-14	9606.ENSP00000215794,9606.ENSP00000251642,9606.ENSP00000259030,9606.ENSP00000264346,9606.ENSP00000264350,9606.ENSP00000359504,9606.ENSP00000359783,9606.ENSP00000359787,9606.ENSP00000368699,9606.ENSP00000377344	GBP5,GBP4,GBP2,GBP1,GBP3
STRING clusters	CL:19438	Mixed, incl. interferon-induced protein 44 family, and receptor-transporting protein 4	6	7	2.17	2.15e-08	9606.ENSP00000259030,9606.ENSP00000264346,9606.ENSP00000359504,9606.ENSP00000359783,9606.ENSP00000359787,9606.ENSP00000377344	OAS3,OASL,MX2,OAS2,IFI6,XAF1,IFIT5,RSAD2,IRF7,MX1,OAS1
STRING clusters	CL:19452	ISG15-protein conjugation	3	5	2.02	0.0031	9606.ENSP00000215794,9606.ENSP00000264350,9606.ENSP00000368699	OAS3,TNFSF10,MT2A,DHX58,BST2,OASL,IL1RN,IFIH1,KYNU,HERC5,LAMP3,RAB20,SECTM1,CXCR1,CXCL8,CD7,MX2,OAS2,IFI6,CTSL,XAF1,GBP5,GBP4,GBP2,GBP1,GBP3,IFI44,IFI44L,IFIT5,MMP9,ISG15,RSAD2,DDX60,IRF7,MX1,OAS1,HLA-G,MME,ADM,CLEC4C,RAB5C,IFI27
DISEASES	DOID:0060861	Microphthalmia with limb anomalies	5	8	2.03	3.09e-05	9606.ENSP00000228928,9606.ENSP00000257570,9606.ENSP00000342278,9606.ENSP00000381601,9606.ENSP00000388001	VNN2,VNN3
GO Function	GO:0001730	2-5-oligoadenylate synthetase activity	3	3	2.24	0.0011	9606.ENSP00000228928,9606.ENSP00000342278,9606.ENSP00000388001	OAS3,MT2A,HSPB1,DHX58,BST2,CMPK2,OASL,RTP4,IFIH1,KYNU,HERC6,HERC5,RAB20,CXCL8,MX2,OAS2,IFI6,XAF1,GBP5,GBP4,GBP2,GBP1,GBP3,IFI44,IFI44L,IFIT5,ISG15,RSAD2,DDX60,IRF7,MX1,OAS1,MOV10,HLA-G,ADM,CLEC4C,IFI27
GO Process	GO:0001817	Regulation of cytokine production	14	742	0.51	0.0311	9606.ENSP00000248553,9606.ENSP00000251642,9606.ENSP00000252593,9606.ENSP00000263642,9606.ENSP00000264350,9606.ENSP00000359488,9606.ENSP00000359504,9606.ENSP00000368699,9606.ENSP00000371420,9606.ENSP00000371471,9606.ENSP00000377344,9606.ENSP00000380150,9606.ENSP00000380697,9606.ENSP00000412927	OAS3,MT2A,DHX58,BST2,OASL,RTP4,IFIH1,KYNU,HERC5,RAB20,MX2,OAS2,IFI6,XAF1,GBP5,GBP4,GBP2,GBP1,GBP3,IFI44L,IFIT5,ISG15,RSAD2,DDX60,IRF7,MX1,OAS1,MOV10,HLA-G,ADM,CLEC4C,IFI27
GO Process	GO:0002252	Immune effector process	28	969	0.7	1.17e-09	9606.ENSP00000228928,9606.ENSP00000251642,9606.ENSP00000252593,9606.ENSP00000257570,9606.ENSP00000259030,9606.ENSP00000263642,9606.ENSP00000264350,9606.ENSP00000295683,9606.ENSP00000333657,9606.ENSP00000342278,9606.ENSP00000342513,9606.ENSP00000359504,9606.ENSP00000359512,9606.ENSP00000359787,9606.ENSP00000360860,9606.ENSP00000361405,9606.ENSP00000368699,9606.ENSP00000371471,9606.ENSP00000377344,…	OAS3,MT2A,DHX58,BST2,OASL,IFIH1,KYNU,HERC5,RAB20,MX2,OAS2,IFI6,XAF1,GBP5,GBP4,GBP2,GBP1,GBP3,IFIT5,ISG15,RSAD2,DDX60,IRF7,MX1,OAS1,HLA-G,CLEC4C,IFI27
GO Process	GO:0002376	Immune system process	48	2481	0.53	4.28e-12	9606.ENSP00000228928,9606.ENSP00000241261,9606.ENSP00000245185,9606.ENSP00000251642,9606.ENSP00000252593,9606.ENSP00000257570,9606.ENSP00000259030,9606.ENSP00000259206,9606.ENSP00000263642,9606.ENSP00000264170,9606.ENSP00000264346,9606.ENSP00000264350,9606.ENSP00000265598,9606.ENSP00000267328,9606.ENSP00000269389,9606.ENSP00000295683,9606.ENSP00000305529,9606.ENSP00000306512,9606.ENSP00000312027,…	OAS3,TNFSF10,MT2A,DHX58,BST2,OASL,RTP4,IL1RN,IFIH1,KYNU,HERC6,HERC5,LAMP3,RAB20,SECTM1,CXCR1,SIRPG,CXCL8,CD7,MX2,OAS2,IFI6,CTSL,XAF1,GBP5,GBP4,GBP2,GBP1,GBP3,IFI44,IFI44L,IFIT5,MMP9,ISG15,RSAD2,DDX60,CARD11,IRF7,MX1,OAS1,ZFP36L1,MOV10,HLA-G,MME,ADM,CLEC4C,RAB5C,IFI27
GO Process	GO:0002831	Regulation of response to biotic stimulus	10	406	0.63	0.0391	9606.ENSP00000215794,9606.ENSP00000251642,9606.ENSP00000252486,9606.ENSP00000264350,9606.ENSP00000359488,9606.ENSP00000377344,9606.ENSP00000380150,9606.ENSP00000380697,9606.ENSP00000412927,9606.ENSP00000440428	OAS3,MT2A,DHX58,BST2,OASL,RTP4,IL1RN,LGALS3BP,IFIH1,KYNU,HERC5,RAB20,CXCL8,MX2,OAS2,IFI6,XAF1,GBP5,GBP4,GBP2,GBP1,GBP3,IFI44L,IFIT5,ISG15,RSAD2,DDX60,SPP1,IRF7,MX1,OAS1,MOV10,HLA-G,ADM,CLEC4C,IFI27
GO Function	GO:0003725	Double-stranded rna binding	8	75	1.27	8.21e-05	9606.ENSP00000228928,9606.ENSP00000251642,9606.ENSP00000257570,9606.ENSP00000263642,9606.ENSP00000264852,9606.ENSP00000342278,9606.ENSP00000377344,9606.ENSP00000388001	OAS3,MT2A,BST2,LAMA5,OASL,IL1RN,KYNU,LAMP3,RAB20,CXCR1,CXCL8,MX2,OAS2,IFI6,XAF1,GBP5,GBP4,GBP2,GBP1,GBP3,MMP9,SPRY2,ISG15,NKX3-1,RSAD2,IRF7,MX1,OAS1,ZFP36L1,PNPT1,HLA-G,MME,IFI27
GO Function	GO:0003727	Single-stranded rna binding	5	82	1.02	0.0276	9606.ENSP00000251642,9606.ENSP00000263642,9606.ENSP00000360860,9606.ENSP00000377344,9606.ENSP00000400646	USP18,OAS3,DHX58,OASL,RTP4,HERC6,HERC5,MX2,OAS2,IFI6,XAF1,GBP2,GBP1,IFI44,IFI44L,IFIT5,ISG15,RSAD2,DDX60,IRF7,MX1,OAS1,IFI27
GO Function	GO:0003924	GTPase activity	12	318	0.82	0.0005	9606.ENSP00000267328,9606.ENSP00000299759,9606.ENSP00000333326,9606.ENSP00000333657,9606.ENSP00000359488,9606.ENSP00000359490,9606.ENSP00000359497,9606.ENSP00000359504,9606.ENSP00000359512,9606.ENSP00000371897,9606.ENSP00000381601,9606.ENSP00000447053	OAS3,DHX58,BST2,OASL,IFIH1,HERC5,LAMP3,CD7,MX2,OAS2,IFI6,GBP5,GBP1,GBP3,IFIT5,ISG15,RSAD2,DDX60,IRF7,MX1,OAS1,HLA-G,CLEC4C,IFI27
GO Function	GO:0005525	GTP binding	13	370	0.78	0.0005	9606.ENSP00000267328,9606.ENSP00000299759,9606.ENSP00000333326,9606.ENSP00000333657,9606.ENSP00000359488,9606.ENSP00000359490,9606.ENSP00000359497,9606.ENSP00000359504,9606.ENSP00000359512,9606.ENSP00000359787,9606.ENSP00000371897,9606.ENSP00000381601,9606.ENSP00000447053	OAS3,MX2,OAS2,IFI6,XAF1,RSAD2,OAS1
GO Process	GO:0006950	Response to stress	44	3485	0.34	3.89e-05	9606.ENSP00000228928,9606.ENSP00000245185,9606.ENSP00000248553,9606.ENSP00000251642,9606.ENSP00000252486,9606.ENSP00000252593,9606.ENSP00000257570,9606.ENSP00000259030,9606.ENSP00000259206,9606.ENSP00000262776,9606.ENSP00000263642,9606.ENSP00000264170,9606.ENSP00000264350,9606.ENSP00000267328,9606.ENSP00000288490,9606.ENSP00000306512,9606.ENSP00000333657,9606.ENSP00000342278,9606.ENSP00000342513,…	OAS3,MT2A,BST2,LAMA5,OASL,IL1RN,RAB20,CXCR1,CXCL8,MX2,OAS2,IFI6,XAF1,GBP5,GBP4,GBP2,GBP1,GBP3,MMP9,SPRY2,ISG15,NKX3-1,RSAD2,IRF7,MX1,OAS1,ZFP36L1,PNPT1,HLA-G,MME,IFI27
GO Process	GO:0006952	Defense response	36	1296	0.68	1.36e-12	9606.ENSP00000228928,9606.ENSP00000245185,9606.ENSP00000251642,9606.ENSP00000252593,9606.ENSP00000257570,9606.ENSP00000259030,9606.ENSP00000259206,9606.ENSP00000262776,9606.ENSP00000263642,9606.ENSP00000264170,9606.ENSP00000264350,9606.ENSP00000267328,9606.ENSP00000306512,9606.ENSP00000333657,9606.ENSP00000342278,9606.ENSP00000342513,9606.ENSP00000354822,9606.ENSP00000359488,9606.ENSP00000359490,…	OAS3,DHX58,BST2,OASL,IFIH1,HERC5,MX2,OAS2,IFI6,IFIT5,ISG15,RSAD2,DDX60,IRF7,MX1,OAS1,CLEC4C,IFI27
GO Process	GO:0006955	Immune response	42	1588	0.66	2.61e-14	9606.ENSP00000228928,9606.ENSP00000241261,9606.ENSP00000245185,9606.ENSP00000251642,9606.ENSP00000252593,9606.ENSP00000257570,9606.ENSP00000259206,9606.ENSP00000263642,9606.ENSP00000264170,9606.ENSP00000264350,9606.ENSP00000265598,9606.ENSP00000267328,9606.ENSP00000269389,9606.ENSP00000295683,9606.ENSP00000306512,9606.ENSP00000312027,9606.ENSP00000333657,9606.ENSP00000342278,9606.ENSP00000342513,…	OAS3,OASL,MX2,OAS2,IFI6,XAF1,GBP2,IFIT5,RSAD2,IRF7,MX1,OAS1,IFI27
GO Process	GO:0007154	Cell communication	59	5320	0.28	6.76e-06	9606.ENSP00000228928,9606.ENSP00000241261,9606.ENSP00000245185,9606.ENSP00000248553,9606.ENSP00000252486,9606.ENSP00000252593,9606.ENSP00000252999,9606.ENSP00000254079,9606.ENSP00000257570,9606.ENSP00000259206,9606.ENSP00000262776,9606.ENSP00000263642,9606.ENSP00000267328,9606.ENSP00000269389,9606.ENSP00000272371,9606.ENSP00000280772,9606.ENSP00000288490,9606.ENSP00000292641,9606.ENSP00000295683,…	OAS3,OASL,OAS2,MX1,OAS1
GO Process	GO:0007165	Signal transduction	58	4876	0.31	7.45e-07	9606.ENSP00000228928,9606.ENSP00000241261,9606.ENSP00000245185,9606.ENSP00000248553,9606.ENSP00000252486,9606.ENSP00000252593,9606.ENSP00000252999,9606.ENSP00000254079,9606.ENSP00000257570,9606.ENSP00000259206,9606.ENSP00000262776,9606.ENSP00000263642,9606.ENSP00000267328,9606.ENSP00000269389,9606.ENSP00000280772,9606.ENSP00000288490,9606.ENSP00000292641,9606.ENSP00000295683,9606.ENSP00000299759,…	OAS3,MT2A,HSPB1,DHX58,APOE,BST2,CMPK2,OASL,RTP4,IFIH1,KYNU,HERC6,HERC5,RAB20,CXCR1,CXCL8,MX2,OAS2,IFI6,XAF1,GBP5,GBP4,GBP2,GBP1,GBP3,IFI44,IFI44L,IFIT5,ISG15,GPNMB,RSAD2,PLXNA1,DDX60,SPP1,IRF7,MX1,OAS1,MOV10,HLA-G,ADM,CLEC4C,IFI27
GO Process	GO:0007166	Cell surface receptor signaling pathway	34	2325	0.4	6.96e-05	9606.ENSP00000228928,9606.ENSP00000241261,9606.ENSP00000245185,9606.ENSP00000248553,9606.ENSP00000252593,9606.ENSP00000252999,9606.ENSP00000257570,9606.ENSP00000259206,9606.ENSP00000288490,9606.ENSP00000295683,9606.ENSP00000306512,9606.ENSP00000312027,9606.ENSP00000333657,9606.ENSP00000342278,9606.ENSP00000342513,9606.ENSP00000354822,9606.ENSP00000355996,9606.ENSP00000359497,9606.ENSP00000359504,…	OAS3,MT2A,HSPB1,DHX58,APOE,BST2,CMPK2,OASL,RTP4,IFIH1,KYNU,HERC6,HERC5,RAB20,CXCL8,MX2,OAS2,IFI6,XAF1,GBP5,GBP4,GBP2,GBP1,GBP3,IFI44,IFI44L,IFIT5,ISG15,RSAD2,DDX60,IRF7,MX1,OAS1,MOV10,HLA-G,ADM,CLEC4C,IFI27
GO Process	GO:0009605	Response to external stimulus	42	2310	0.5	2.92e-09	9606.ENSP00000228928,9606.ENSP00000245185,9606.ENSP00000248553,9606.ENSP00000251642,9606.ENSP00000252486,9606.ENSP00000252593,9606.ENSP00000256722,9606.ENSP00000257570,9606.ENSP00000259030,9606.ENSP00000263642,9606.ENSP00000264170,9606.ENSP00000264346,9606.ENSP00000264350,9606.ENSP00000267328,9606.ENSP00000295683,9606.ENSP00000306512,9606.ENSP00000333657,9606.ENSP00000342278,9606.ENSP00000342513,…	OAS3,DHX58,BST2,OASL,RTP4,IFIH1,HERC5,CXCR1,MX2,OAS2,IFI6,GBP1,GBP3,IFI44L,IFIT5,MMP9,ISG15,RSAD2,DDX60,IRF7,MX1,OAS1,MOV10,HLA-G,MME,CLEC4C,RAB5C,IFI27
GO Process	GO:0009615	Response to virus	24	293	1.15	1.5e-16	9606.ENSP00000228928,9606.ENSP00000248553,9606.ENSP00000251642,9606.ENSP00000252593,9606.ENSP00000257570,9606.ENSP00000259030,9606.ENSP00000263642,9606.ENSP00000264350,9606.ENSP00000333657,9606.ENSP00000342278,9606.ENSP00000342513,9606.ENSP00000359504,9606.ENSP00000359512,9606.ENSP00000359783,9606.ENSP00000359787,9606.ENSP00000360860,9606.ENSP00000368699,9606.ENSP00000371471,9606.ENSP00000377344,…	USP18,HERC5,ISG15
GO Process	GO:0010033	Response to organic substance	44	3011	0.4	6.09e-07	9606.ENSP00000228928,9606.ENSP00000241261,9606.ENSP00000245185,9606.ENSP00000248553,9606.ENSP00000252593,9606.ENSP00000252999,9606.ENSP00000254079,9606.ENSP00000256722,9606.ENSP00000257570,9606.ENSP00000259206,9606.ENSP00000263642,9606.ENSP00000264170,9606.ENSP00000265598,9606.ENSP00000267328,9606.ENSP00000295683,9606.ENSP00000306512,9606.ENSP00000333657,9606.ENSP00000342278,9606.ENSP00000342513,…	OAS3,MT2A,BST2,LAMA5,OASL,IL1RN,CXCR1,CXCL8,MX2,OAS2,IFI6,XAF1,GBP2,GBP1,MMP9,ISG15,RSAD2,IRF7,MX1,OAS1,HLA-G,IFI27
GO Function	GO:0017111	Nucleoside-triphosphatase activity	17	760	0.59	0.00068	9606.ENSP00000251642,9606.ENSP00000263642,9606.ENSP00000267328,9606.ENSP00000299759,9606.ENSP00000333326,9606.ENSP00000333657,9606.ENSP00000334563,9606.ENSP00000359488,9606.ENSP00000359490,9606.ENSP00000359497,9606.ENSP00000359504,9606.ENSP00000359512,9606.ENSP00000371897,9606.ENSP00000377344,9606.ENSP00000381601,9606.ENSP00000399797,9606.ENSP00000447053	GBP5,GBP4,GBP2,GBP1,GBP3
GO Function	GO:0017159	Pantetheine hydrolase activity	2	3	2.06	0.0475	9606.ENSP00000322276,9606.ENSP00000440594	GBP5,GBP4,GBP2,GBP1,GBP3
GO Process	GO:0019221	Cytokine-mediated signaling pathway	22	678	0.75	3.92e-08	9606.ENSP00000228928,9606.ENSP00000245185,9606.ENSP00000252593,9606.ENSP00000252999,9606.ENSP00000257570,9606.ENSP00000259206,9606.ENSP00000295683,9606.ENSP00000306512,9606.ENSP00000333657,9606.ENSP00000342278,9606.ENSP00000342513,9606.ENSP00000354822,9606.ENSP00000359497,9606.ENSP00000359504,9606.ENSP00000361405,9606.ENSP00000368699,9606.ENSP00000371471,9606.ENSP00000380697,9606.ENSP00000381601,…	GBP5,GBP4,GBP2,GBP1,GBP3
GO Process	GO:0023052	Signaling	59	5239	0.29	3.8e-06	9606.ENSP00000228928,9606.ENSP00000241261,9606.ENSP00000245185,9606.ENSP00000248553,9606.ENSP00000252486,9606.ENSP00000252593,9606.ENSP00000252999,9606.ENSP00000254079,9606.ENSP00000257570,9606.ENSP00000259206,9606.ENSP00000262776,9606.ENSP00000263642,9606.ENSP00000267328,9606.ENSP00000269389,9606.ENSP00000272371,9606.ENSP00000280772,9606.ENSP00000288490,9606.ENSP00000292641,9606.ENSP00000295683,…	OAS3,TNFSF10,MT2A,HSPB1,APOE,BST2,LAMA5,PPP1R1B,OASL,IL1RN,LGALS3BP,IFIH1,RAB20,SECTM1,ANK3,DGKI,SCGB3A1,CXCR1,RRAD,SIRPG,CXCL8,CD7,MX2,OAS2,IFI6,CTSL,RYR1,XAF1,G0S2,GBP2,GBP1,MMP9,COL15A1,ISG15,KBTBD7,NKX3-1,GPNMB,RSAD2,ARHGAP5,PLXNA1,SPP1,CARD11,IRF7,MX1,RASGRP3,PRR5,OAS1,ZFP36L1,MOV10,HLA-G,PTPRG,PDGFC,LY6E,ENSP00000429240,ADM,CLEC4C,RAB5C,IFI27
GO Process	GO:0031623	Receptor internalization	5	64	1.13	0.014	9606.ENSP00000295683,9606.ENSP00000306512,9606.ENSP00000333657,9606.ENSP00000381601,9606.ENSP00000436607	OAS3,TNFSF10,MT2A,HSPB1,BST2,LAMA5,PPP1R1B,CMPK2,OASL,IL1RN,IFIH1,KYNU,LAMP3,RAB20,CXCR1,CXCL8,MX2,OAS2,IFI6,CTSL,RYR1,XAF1,GBP5,GBP4,GBP2,GBP1,GBP3,MMP9,SPRY2,ISG15,NKX3-1,RSAD2,SPP1,IRF7,MX1,OAS1,ZFP36L1,PNPT1,HLA-G,MME,PDGFC,FBXO32,ADM,IFI27
GO Process	GO:0032480	Negative regulation of type i interferon production	4	45	1.19	0.0479	9606.ENSP00000251642,9606.ENSP00000263642,9606.ENSP00000264350,9606.ENSP00000368699	OAS3,MT2A,HSPB1,BST2,LAMA5,CMPK2,OASL,IL1RN,IFIH1,RAB20,CXCR1,CXCL8,MX2,OAS2,IFI6,CTSL,RYR1,XAF1,GBP5,GBP4,GBP2,GBP1,GBP3,MMP9,SPRY2,ISG15,NKX3-1,RSAD2,SPP1,IRF7,MX1,OAS1,ZFP36L1,PNPT1,HLA-G,MME,PDGFC,FBXO32,IFI27
GO Function	GO:0032555	Purine ribonucleotide binding	24	1864	0.35	0.0276	9606.ENSP00000228928,9606.ENSP00000251642,9606.ENSP00000256722,9606.ENSP00000263642,9606.ENSP00000267328,9606.ENSP00000288490,9606.ENSP00000299759,9606.ENSP00000333326,9606.ENSP00000333657,9606.ENSP00000334563,9606.ENSP00000342278,9606.ENSP00000352608,9606.ENSP00000359488,9606.ENSP00000359490,9606.ENSP00000359497,9606.ENSP00000359504,9606.ENSP00000359512,9606.ENSP00000359787,9606.ENSP00000371897,…	GBP5,GBP4,GBP2,GBP1,GBP3
GO Process	GO:0034097	Response to cytokine	33	1101	0.72	3.27e-12	9606.ENSP00000228928,9606.ENSP00000245185,9606.ENSP00000252593,9606.ENSP00000252999,9606.ENSP00000257570,9606.ENSP00000259206,9606.ENSP00000264170,9606.ENSP00000265598,9606.ENSP00000267328,9606.ENSP00000295683,9606.ENSP00000306512,9606.ENSP00000333657,9606.ENSP00000342278,9606.ENSP00000342513,9606.ENSP00000354822,9606.ENSP00000359488,9606.ENSP00000359490,9606.ENSP00000359497,9606.ENSP00000359504,…	GBP5,GBP4,GBP2,GBP1,GBP3
GO Process	GO:0034341	Response to interferon-gamma	15	182	1.15	3.66e-10	9606.ENSP00000228928,9606.ENSP00000245185,9606.ENSP00000252593,9606.ENSP00000257570,9606.ENSP00000264170,9606.ENSP00000267328,9606.ENSP00000342278,9606.ENSP00000359488,9606.ENSP00000359490,9606.ENSP00000359497,9606.ENSP00000359504,9606.ENSP00000359512,9606.ENSP00000380697,9606.ENSP00000388001,9606.ENSP00000412927	GBP5,GBP4,GBP2,GBP1,GBP3
GO Process	GO:0035455	Response to interferon-alpha	4	23	1.48	0.0049	9606.ENSP00000252593,9606.ENSP00000265598,9606.ENSP00000333657,9606.ENSP00000388001	OAS3,OASL,OAS2,OAS1
GO Function	GO:0035639	Purine ribonucleoside triphosphate binding	24	1799	0.36	0.018	9606.ENSP00000228928,9606.ENSP00000251642,9606.ENSP00000256722,9606.ENSP00000263642,9606.ENSP00000267328,9606.ENSP00000288490,9606.ENSP00000299759,9606.ENSP00000333326,9606.ENSP00000333657,9606.ENSP00000334563,9606.ENSP00000342278,9606.ENSP00000352608,9606.ENSP00000359488,9606.ENSP00000359490,9606.ENSP00000359497,9606.ENSP00000359504,9606.ENSP00000359512,9606.ENSP00000359787,9606.ENSP00000371897,…	OAS3,OASL,OAS2,OAS1
GO Process	GO:0042221	Response to chemical	50	4333	0.3	5.33e-05	9606.ENSP00000228928,9606.ENSP00000241261,9606.ENSP00000245185,9606.ENSP00000248553,9606.ENSP00000252486,9606.ENSP00000252593,9606.ENSP00000252999,9606.ENSP00000254079,9606.ENSP00000256722,9606.ENSP00000257570,9606.ENSP00000259030,9606.ENSP00000259206,9606.ENSP00000263642,9606.ENSP00000264170,9606.ENSP00000265598,9606.ENSP00000267328,9606.ENSP00000280772,9606.ENSP00000295683,9606.ENSP00000306512,…	OAS3,TNFSF10,MT2A,HSPB1,DHX58,APOE,BST2,LAMA5,PPP1R1B,CMPK2,OASL,RTP4,IL1RN,LGALS3BP,IFIH1,KYNU,HERC6,HERC5,LAMP3,RAB20,SECTM1,ANK3,DGKI,SCGB3A1,CXCR1,RRAD,SIRPG,CXCL8,CD7,MX2,OAS2,IFI6,CTSL,RYR1,XAF1,G0S2,GBP5,GBP4,GBP2,GBP1,GBP3,IFI44,IFI44L,IFIT5,MMP9,COL15A1,SPRY2,ISG15,KBTBD7,NKX3-1,GPNMB,RSAD2,ARHGAP5,PLXNA1,DDX60,SPP1,CARD11,IRF7,MX1,RASGRP3,PRR5,OAS1,ZFP36L1,MOV10,PNPT1,HLA-G,PTPRG,MME,PD…
GO Function	GO:0042803	Protein homodimerization activity	14	673	0.56	0.0085	9606.ENSP00000163416,9606.ENSP00000248553,9606.ENSP00000252486,9606.ENSP00000252593,9606.ENSP00000257245,9606.ENSP00000264170,9606.ENSP00000359488,9606.ENSP00000359490,9606.ENSP00000359497,9606.ENSP00000359504,9606.ENSP00000359512,9606.ENSP00000412927,9606.ENSP00000418525,9606.ENSP00000422464	OAS3,TNFSF10,MT2A,HSPB1,APOE,BST2,LAMA5,PPP1R1B,OASL,IL1RN,LGALS3BP,IFIH1,RAB20,SECTM1,OTOF,ANK3,DGKI,SCGB3A1,CXCR1,RRAD,SIRPG,CXCL8,CD7,MX2,OAS2,IFI6,CTSL,RYR1,XAF1,G0S2,GBP2,GBP1,MMP9,COL15A1,ISG15,KBTBD7,NKX3-1,GPNMB,RSAD2,ARHGAP5,PLXNA1,SPP1,CARD11,IRF7,MX1,RASGRP3,PRR5,OAS1,ZFP36L1,MOV10,HLA-G,PTPRG,PDGFC,LY6E,ENSP00000429240,ADM,CLEC4C,RAB5C,IFI27
GO Process	GO:0044419	Interspecies interaction between organisms	38	1899	0.54	2.92e-09	9606.ENSP00000228928,9606.ENSP00000245185,9606.ENSP00000248553,9606.ENSP00000251642,9606.ENSP00000252486,9606.ENSP00000252593,9606.ENSP00000256722,9606.ENSP00000257570,9606.ENSP00000259030,9606.ENSP00000263642,9606.ENSP00000264170,9606.ENSP00000264346,9606.ENSP00000264350,9606.ENSP00000267328,9606.ENSP00000306512,9606.ENSP00000333657,9606.ENSP00000342278,9606.ENSP00000342513,9606.ENSP00000354822,…	OAS3,TNFSF10,MT2A,HSPB1,APOE,BST2,LAMA5,PPP1R1B,OASL,IL1RN,LGALS3BP,IFIH1,RAB20,SECTM1,OTOF,ANK3,DGKI,SCGB3A1,CXCR1,RRAD,SIRPG,CXCL8,CD7,MX2,OAS2,IFI6,CTSL,RYR1,XAF1,G0S2,GBP2,GBP1,MMP9,COL15A1,ISG15,KBTBD7,NKX3-1,GPNMB,RSAD2,ARHGAP5,PLXNA1,SPP1,CARD11,IRF7,MX1,RASGRP3,PRR5,OAS1,ZFP36L1,MOV10,HLA-G,PTPRG,PDGFC,LY6E,ENSP00000429240,ADM,CLEC4C,RAB5C,IFI27
GO Process	GO:0045069	Regulation of viral genome replication	11	99	1.28	2.21e-08	9606.ENSP00000228928,9606.ENSP00000252593,9606.ENSP00000257570,9606.ENSP00000306512,9606.ENSP00000342278,9606.ENSP00000360860,9606.ENSP00000368699,9606.ENSP00000371471,9606.ENSP00000381601,9606.ENSP00000388001,9606.ENSP00000483430	OAS3,MT2A,HSPB1,APOE,BST2,LAMA5,CMPK2,OASL,IL1RN,IFIH1,RAB20,ANK3,CXCR1,CXCL8,MX2,OAS2,IFI6,CTSL,RYR1,XAF1,GBP5,GBP4,GBP2,GBP1,GBP3,MMP9,SPRY2,ISG15,NKX3-1,RSAD2,SPP1,IRF7,MX1,OAS1,ZFP36L1,PNPT1,HLA-G,MME,PDGFC,FBXO32,IFI27
GO Process	GO:0045071	Negative regulation of viral genome replication	9	61	1.41	1.28e-07	9606.ENSP00000228928,9606.ENSP00000252593,9606.ENSP00000257570,9606.ENSP00000342278,9606.ENSP00000360860,9606.ENSP00000368699,9606.ENSP00000371471,9606.ENSP00000381601,9606.ENSP00000388001	OAS3,TNFSF10,MT2A,HSPB1,APOE,BST2,LAMA5,PPP1R1B,CMPK2,OASL,IL1RN,LGALS3BP,IFIH1,RAB20,SECTM1,ANK3,DGKI,SCGB3A1,CXCR1,RRAD,SIRPG,CXCL8,CD7,MX2,OAS2,IFI6,CTSL,RYR1,XAF1,G0S2,GBP5,GBP4,GBP2,GBP1,GBP3,MMP9,COL15A1,SPRY2,ISG15,KBTBD7,NKX3-1,GPNMB,RSAD2,ARHGAP5,PLXNA1,SPP1,CARD11,IRF7,MX1,RASGRP3,PRR5,OAS1,ZFP36L1,MOV10,PNPT1,HLA-G,PTPRG,MME,PDGFC,FBXO32,LY6E,ENSP00000429240,ADM,CLEC4C,RAB5C,IFI27
GO Process	GO:0045087	Innate immune response	28	703	0.84	8.37e-13	9606.ENSP00000228928,9606.ENSP00000245185,9606.ENSP00000251642,9606.ENSP00000252593,9606.ENSP00000257570,9606.ENSP00000263642,9606.ENSP00000264170,9606.ENSP00000264350,9606.ENSP00000267328,9606.ENSP00000333657,9606.ENSP00000342278,9606.ENSP00000342513,9606.ENSP00000354822,9606.ENSP00000359488,9606.ENSP00000359490,9606.ENSP00000359497,9606.ENSP00000359504,9606.ENSP00000359512,9606.ENSP00000360860,…	OAS3,TNFSF10,MT2A,HSPB1,APOE,BST2,LAMA5,PPP1R1B,CMPK2,OASL,RTP4,IL1RN,IFIH1,KYNU,LAMP3,RAB20,ANK3,CXCR1,CXCL8,MX2,OAS2,IFI6,CTSL,RYR1,XAF1,GBP5,GBP4,GBP2,GBP1,GBP3,MMP9,SPRY2,ISG15,NKX3-1,GPNMB,RSAD2,PLXNA1,SPP1,IRF7,MX1,OAS1,ZFP36L1,PNPT1,HLA-G,MME,PDGFC,FBXO32,SMTNL1,ADM,IFI27
GO Process	GO:0050792	Regulation of viral process	13	215	1.02	3.29e-07	9606.ENSP00000228928,9606.ENSP00000252486,9606.ENSP00000252593,9606.ENSP00000257570,9606.ENSP00000265598,9606.ENSP00000306512,9606.ENSP00000342278,9606.ENSP00000360860,9606.ENSP00000368699,9606.ENSP00000371471,9606.ENSP00000381601,9606.ENSP00000388001,9606.ENSP00000483430	OAS3,MT2A,HSPB1,DHX58,APOE,BST2,OASL,RTP4,IL1RN,LGALS3BP,IFIH1,KYNU,HERC5,RAB20,DGKI,CXCL8,MX2,OAS2,IFI6,RYR1,XAF1,GBP5,GBP4,GBP2,GBP1,GBP3,IFI44L,IFIT5,MMP9,ISG15,NKX3-1,RSAD2,DDX60,SPP1,IRF7,MX1,OAS1,ZFP36L1,MOV10,PNPT1,HLA-G,ADM,CLEC4C,IFI27
GO Process	GO:0050896	Response to stimulus	77	8046	0.22	2.7e-06	9606.ENSP00000228928,9606.ENSP00000241261,9606.ENSP00000245185,9606.ENSP00000248553,9606.ENSP00000251642,9606.ENSP00000252486,9606.ENSP00000252593,9606.ENSP00000252999,9606.ENSP00000254079,9606.ENSP00000256722,9606.ENSP00000257570,9606.ENSP00000259030,9606.ENSP00000259206,9606.ENSP00000262776,9606.ENSP00000263642,9606.ENSP00000264170,9606.ENSP00000264346,9606.ENSP00000264350,9606.ENSP00000265598,…	OAS3,TNFSF10,MT2A,HSPB1,BST2,LAMA5,OASL,IL1RN,DGKI,CXCR1,CXCL8,CD7,MX2,OAS2,IFI6,XAF1,G0S2,GBP2,GBP1,MMP9,ISG15,RSAD2,PLXNA1,CARD11,IRF7,MX1,OAS1,MOV10,HLA-G,PTPRG,PDGFC,LY6E,CLEC4C,IFI27
GO Process	GO:0051239	Regulation of multicellular organismal process	35	3227	0.27	0.0311	9606.ENSP00000248553,9606.ENSP00000251642,9606.ENSP00000252486,9606.ENSP00000252593,9606.ENSP00000252999,9606.ENSP00000259206,9606.ENSP00000263642,9606.ENSP00000264350,9606.ENSP00000306512,9606.ENSP00000342278,9606.ENSP00000345344,9606.ENSP00000352608,9606.ENSP00000355996,9606.ENSP00000359488,9606.ENSP00000359504,9606.ENSP00000361405,9606.ENSP00000366306,9606.ENSP00000368699,9606.ENSP00000370253,…	DHX58,CMPK2,IFIH1,RAB20,RRAD,MX2,MYO18B,GBP5,GBP4,GBP2,GBP1,GBP3,IFI44,IFI44L,ARHGAP5,DDX60,CARD11,MX1,MOV10,RAB5C
GO Process	GO:0051607	Defense response to virus	22	210	1.26	1e-16	9606.ENSP00000228928,9606.ENSP00000251642,9606.ENSP00000252593,9606.ENSP00000257570,9606.ENSP00000259030,9606.ENSP00000263642,9606.ENSP00000264350,9606.ENSP00000333657,9606.ENSP00000342278,9606.ENSP00000342513,9606.ENSP00000359504,9606.ENSP00000359512,9606.ENSP00000359787,9606.ENSP00000360860,9606.ENSP00000368699,9606.ENSP00000371471,9606.ENSP00000377344,9606.ENSP00000380697,9606.ENSP00000381601,…	USP18,OAS3,DHX58,OASL,RTP4,IFIH1,HERC6,HERC5,EPSTI1,MX2,OAS2,IFI6,XAF1,GBP4,GBP2,GBP1,GBP3,IFI44,IFI44L,IFIT5,ISG15,RSAD2,DDX60,IRF7,MX1,OAS1,IFI27
GO Process	GO:0051707	Response to other organism	37	1256	0.71	1.31e-13	9606.ENSP00000228928,9606.ENSP00000245185,9606.ENSP00000248553,9606.ENSP00000251642,9606.ENSP00000252593,9606.ENSP00000256722,9606.ENSP00000257570,9606.ENSP00000259030,9606.ENSP00000263642,9606.ENSP00000264170,9606.ENSP00000264346,9606.ENSP00000264350,9606.ENSP00000267328,9606.ENSP00000306512,9606.ENSP00000333657,9606.ENSP00000342278,9606.ENSP00000342513,9606.ENSP00000354822,9606.ENSP00000359488,…	OAS3,OAS2,OAS1
GO Process	GO:0051716	Cellular response to stimulus	66	6489	0.25	1.27e-05	9606.ENSP00000228928,9606.ENSP00000241261,9606.ENSP00000245185,9606.ENSP00000248553,9606.ENSP00000252486,9606.ENSP00000252593,9606.ENSP00000252999,9606.ENSP00000254079,9606.ENSP00000256722,9606.ENSP00000257570,9606.ENSP00000259206,9606.ENSP00000262776,9606.ENSP00000263642,9606.ENSP00000267328,9606.ENSP00000269389,9606.ENSP00000280772,9606.ENSP00000288490,9606.ENSP00000292641,9606.ENSP00000295683,…	USP18,OAS3,DHX58,OASL,RTP4,IFIH1,HERC6,HERC5,EPSTI1,MX2,OAS2,IFI6,XAF1,GBP5,GBP4,GBP2,GBP1,GBP3,IFI44,IFI44L,IFIT5,ISG15,RSAD2,DDX60,IRF7,MX1,OAS1,IFI27
GO Process	GO:0060333	Interferon-gamma-mediated signaling pathway	9	70	1.35	3.44e-07	9606.ENSP00000228928,9606.ENSP00000245185,9606.ENSP00000257570,9606.ENSP00000342278,9606.ENSP00000359497,9606.ENSP00000359504,9606.ENSP00000380697,9606.ENSP00000388001,9606.ENSP00000412927	USP18,OAS3,BST2,OASL,MX2,OAS2,IFI6,XAF1,GBP2,IFIT5,ISG15,RSAD2,IRF7,MX1,OAS1,HLA-G,IFI27
GO Process	GO:0060337	Type i interferon signaling pathway	15	67	1.59	2.89e-15	9606.ENSP00000228928,9606.ENSP00000252593,9606.ENSP00000257570,9606.ENSP00000333657,9606.ENSP00000342278,9606.ENSP00000342513,9606.ENSP00000354822,9606.ENSP00000359497,9606.ENSP00000368699,9606.ENSP00000371471,9606.ENSP00000380697,9606.ENSP00000381601,9606.ENSP00000388001,9606.ENSP00000412927,9606.ENSP00000483430	OAS3,BST2,OASL,MX2,OAS2,IFI6,XAF1,GBP2,ISG15,RSAD2,IRF7,MX1,OAS1,HLA-G,IFI27
GO Process	GO:0060700	Regulation of ribonuclease activity	4	9	1.89	0.00022	9606.ENSP00000228928,9606.ENSP00000257570,9606.ENSP00000342278,9606.ENSP00000388001	BST2,LAMP3,MX2,OAS1
GO Process	GO:0070887	Cellular response to chemical stimulus	41	2919	0.39	7.35e-06	9606.ENSP00000228928,9606.ENSP00000245185,9606.ENSP00000248553,9606.ENSP00000252486,9606.ENSP00000252593,9606.ENSP00000252999,9606.ENSP00000256722,9606.ENSP00000257570,9606.ENSP00000259206,9606.ENSP00000263642,9606.ENSP00000267328,9606.ENSP00000280772,9606.ENSP00000295683,9606.ENSP00000306512,9606.ENSP00000333657,9606.ENSP00000342278,9606.ENSP00000342513,9606.ENSP00000345344,9606.ENSP00000352608,…	OAS3,OASL,OAS2,OAS1
GO Process	GO:0071310	Cellular response to organic substance	39	2369	0.45	3.29e-07	9606.ENSP00000228928,9606.ENSP00000245185,9606.ENSP00000248553,9606.ENSP00000252593,9606.ENSP00000252999,9606.ENSP00000256722,9606.ENSP00000257570,9606.ENSP00000259206,9606.ENSP00000263642,9606.ENSP00000267328,9606.ENSP00000295683,9606.ENSP00000306512,9606.ENSP00000333657,9606.ENSP00000342278,9606.ENSP00000342513,9606.ENSP00000345344,9606.ENSP00000352608,9606.ENSP00000354822,9606.ENSP00000359488,…	BST2,LAMP3,SECTM1,CD7,MME,CLEC4C
GO Process	GO:0071345	Cellular response to cytokine stimulus	31	1013	0.72	1.4e-11	9606.ENSP00000228928,9606.ENSP00000245185,9606.ENSP00000252593,9606.ENSP00000252999,9606.ENSP00000257570,9606.ENSP00000259206,9606.ENSP00000267328,9606.ENSP00000295683,9606.ENSP00000306512,9606.ENSP00000333657,9606.ENSP00000342278,9606.ENSP00000342513,9606.ENSP00000354822,9606.ENSP00000359488,9606.ENSP00000359490,9606.ENSP00000359497,9606.ENSP00000359504,9606.ENSP00000359512,9606.ENSP00000361405,…	HSPB1,MMP9,SPP1
GO Process	GO:0071346	Cellular response to interferon-gamma	13	161	1.15	1.47e-08	9606.ENSP00000228928,9606.ENSP00000245185,9606.ENSP00000257570,9606.ENSP00000267328,9606.ENSP00000342278,9606.ENSP00000359488,9606.ENSP00000359490,9606.ENSP00000359497,9606.ENSP00000359504,9606.ENSP00000359512,9606.ENSP00000380697,9606.ENSP00000388001,9606.ENSP00000412927	OAS3,IFIH1,OAS2,IRF7,OAS1
GO Function	GO:0097367	Carbohydrate derivative binding	27	2226	0.32	0.0276	9606.ENSP00000228928,9606.ENSP00000251642,9606.ENSP00000252486,9606.ENSP00000256722,9606.ENSP00000263642,9606.ENSP00000267328,9606.ENSP00000288490,9606.ENSP00000299759,9606.ENSP00000333326,9606.ENSP00000333657,9606.ENSP00000334563,9606.ENSP00000342278,9606.ENSP00000345344,9606.ENSP00000352608,9606.ENSP00000359488,9606.ENSP00000359490,9606.ENSP00000359497,9606.ENSP00000359504,9606.ENSP00000359512,…	OAS3,DHX58,BST2,OASL,IFIH1,HERC5,MX2,OAS2,IFI6,GBP1,GBP3,IFI44L,IFIT5,ISG15,RSAD2,DDX60,IRF7,MX1,OAS1,IFI27
GO Process	GO:0098542	Defense response to other organism	32	900	0.79	1.31e-13	9606.ENSP00000228928,9606.ENSP00000245185,9606.ENSP00000251642,9606.ENSP00000252593,9606.ENSP00000257570,9606.ENSP00000259030,9606.ENSP00000263642,9606.ENSP00000264170,9606.ENSP00000264350,9606.ENSP00000267328,9606.ENSP00000333657,9606.ENSP00000342278,9606.ENSP00000342513,9606.ENSP00000354822,9606.ENSP00000359488,9606.ENSP00000359490,9606.ENSP00000359497,9606.ENSP00000359504,9606.ENSP00000359512,…	OAS3,BST2,OASL,OAS2,IFIT5,ISG15,RSAD2,MX1,OAS1
GO Process	GO:1903900	Regulation of viral life cycle	12	153	1.13	1.07e-07	9606.ENSP00000228928,9606.ENSP00000252593,9606.ENSP00000257570,9606.ENSP00000265598,9606.ENSP00000306512,9606.ENSP00000342278,9606.ENSP00000360860,9606.ENSP00000368699,9606.ENSP00000371471,9606.ENSP00000381601,9606.ENSP00000388001,9606.ENSP00000483430	OAS3,MT2A,OASL,OAS2,GBP5,GBP4,GBP2,GBP1,GBP3,IRF7,OAS1,HLA-G
KEGG	hsa04621	NOD-like receptor signaling pathway	10	174	1	2.26e-05	9606.ENSP00000228928,9606.ENSP00000306512,9606.ENSP00000342278,9606.ENSP00000359488,9606.ENSP00000359490,9606.ENSP00000359497,9606.ENSP00000359504,9606.ENSP00000359512,9606.ENSP00000380697,9606.ENSP00000388001	OAS3,MT2A,OASL,OAS2,GBP2,GBP1,IRF7,OAS1,HLA-G
KEGG	hsa04622	RIG-I-like receptor signaling pathway	5	70	1.09	0.0048	9606.ENSP00000251642,9606.ENSP00000263642,9606.ENSP00000306512,9606.ENSP00000368699,9606.ENSP00000380697	OAS3,IFIH1,OAS2,OAS1
KEGG	hsa05160	Hepatitis C	7	156	0.89	0.0037	9606.ENSP00000228928,9606.ENSP00000333657,9606.ENSP00000342278,9606.ENSP00000371471,9606.ENSP00000380697,9606.ENSP00000381601,9606.ENSP00000388001	USP18,OAS3,MT2A,BST2,OASL,HERC5,MX2,OAS2,IFI6,XAF1,GBP5,GBP4,GBP2,GBP1,GBP3,IFIT5,ISG15,RSAD2,IRF7,MX1,OAS1,HLA-G,IFI27
KEGG	hsa05162	Measles	7	138	0.94	0.0023	9606.ENSP00000228928,9606.ENSP00000263642,9606.ENSP00000333657,9606.ENSP00000342278,9606.ENSP00000380697,9606.ENSP00000381601,9606.ENSP00000388001	USP18,OAS3,OASL,HERC5,MX2,OAS2,ISG15,MX1,OAS1
KEGG	hsa05164	Influenza A	10	165	1.02	2.26e-05	9606.ENSP00000228928,9606.ENSP00000241261,9606.ENSP00000263642,9606.ENSP00000306512,9606.ENSP00000333657,9606.ENSP00000342278,9606.ENSP00000371471,9606.ENSP00000380697,9606.ENSP00000381601,9606.ENSP00000388001	OAS3,BST2,OASL,CXCL8,OAS2,IFIT5,ISG15,RSAD2,MX1,OAS1,IFI27
Reactome	HSA-1169408	ISG15 antiviral mechanism	5	73	1.07	0.0234	9606.ENSP00000215794,9606.ENSP00000264350,9606.ENSP00000333657,9606.ENSP00000368699,9606.ENSP00000381601	OAS3,DHX58,OASL,IFIH1,SIDT1,OAS2,DDX60,OAS1
Reactome	HSA-1169410	Antiviral mechanism by IFN-stimulated genes	9	81	1.28	8.52e-07	9606.ENSP00000215794,9606.ENSP00000228928,9606.ENSP00000257570,9606.ENSP00000264350,9606.ENSP00000333657,9606.ENSP00000342278,9606.ENSP00000368699,9606.ENSP00000381601,9606.ENSP00000388001	IFI6,GBP1,ISG15,OAS1
Reactome	HSA-1280215	Cytokine Signaling in Immune system	27	681	0.84	2.09e-12	9606.ENSP00000215794,9606.ENSP00000228928,9606.ENSP00000245185,9606.ENSP00000252593,9606.ENSP00000252999,9606.ENSP00000257570,9606.ENSP00000259206,9606.ENSP00000264350,9606.ENSP00000306512,9606.ENSP00000333657,9606.ENSP00000342278,9606.ENSP00000342513,9606.ENSP00000354822,9606.ENSP00000359488,9606.ENSP00000359490,9606.ENSP00000359497,9606.ENSP00000359504,9606.ENSP00000359512,9606.ENSP00000360860,…	RAB20,RRAD,TUBA8,MX2,GBP5,GBP4,GBP2,GBP1,GBP3,IFI44L,ARHGAP5,MX1,RAB5C
Reactome	HSA-168256	Immune System	41	1956	0.56	4.74e-11	9606.ENSP00000215794,9606.ENSP00000228928,9606.ENSP00000245185,9606.ENSP00000251642,9606.ENSP00000252593,9606.ENSP00000252999,9606.ENSP00000257570,9606.ENSP00000259206,9606.ENSP00000263642,9606.ENSP00000264346,9606.ENSP00000264350,9606.ENSP00000295683,9606.ENSP00000306512,9606.ENSP00000333326,9606.ENSP00000333657,9606.ENSP00000342278,9606.ENSP00000342513,9606.ENSP00000345344,9606.ENSP00000354822,…	RAB20,RRAD,TUBA8,MX2,GBP5,GBP4,GBP2,GBP1,GBP3,ARHGAP5,MX1,RAB5C
Reactome	HSA-168928	DDX58/IFIH1-mediated induction of interferon-alpha/beta	5	76	1.06	0.0249	9606.ENSP00000251642,9606.ENSP00000263642,9606.ENSP00000264350,9606.ENSP00000368699,9606.ENSP00000380697	DHX58,IFIH1,RAB20,RRAD,TUBA8,MX2,MYO18B,GBP5,GBP4,GBP2,GBP1,GBP3,ARHGAP5,DDX60,MX1,MOV10,RAB5C
Reactome	HSA-877300	Interferon gamma signaling	12	88	1.37	2.11e-10	9606.ENSP00000228928,9606.ENSP00000245185,9606.ENSP00000257570,9606.ENSP00000342278,9606.ENSP00000359488,9606.ENSP00000359490,9606.ENSP00000359497,9606.ENSP00000359504,9606.ENSP00000359512,9606.ENSP00000380697,9606.ENSP00000388001,9606.ENSP00000412927	RAB20,RRAD,TUBA8,MX2,GBP5,GBP4,GBP2,GBP1,GBP3,MX1,RAB5C
Reactome	HSA-8983711	OAS antiviral response	4	9	1.89	0.00022	9606.ENSP00000228928,9606.ENSP00000257570,9606.ENSP00000342278,9606.ENSP00000388001	OAS3,DHX58,BST2,OASL,RTP4,IFIH1,HERC5,MX2,OAS2,IFI6,GBP1,GBP3,IFI44L,IFIT5,ISG15,RSAD2,DDX60,IRF7,MX1,OAS1,MOV10,IFI27
Reactome	HSA-909733	Interferon alpha/beta signaling	17	69	1.63	7.15e-19	9606.ENSP00000215794,9606.ENSP00000228928,9606.ENSP00000252593,9606.ENSP00000257570,9606.ENSP00000333657,9606.ENSP00000342278,9606.ENSP00000342513,9606.ENSP00000354822,9606.ENSP00000359497,9606.ENSP00000360860,9606.ENSP00000368699,9606.ENSP00000371471,9606.ENSP00000380697,9606.ENSP00000381601,9606.ENSP00000388001,9606.ENSP00000412927,9606.ENSP00000483430	DHX58,IFIH1,HERC5,ISG15
Reactome	HSA-913531	Interferon Signaling	23	196	1.31	1.9e-19	9606.ENSP00000215794,9606.ENSP00000228928,9606.ENSP00000245185,9606.ENSP00000252593,9606.ENSP00000257570,9606.ENSP00000264350,9606.ENSP00000333657,9606.ENSP00000342278,9606.ENSP00000342513,9606.ENSP00000354822,9606.ENSP00000359488,9606.ENSP00000359490,9606.ENSP00000359497,9606.ENSP00000359504,9606.ENSP00000359512,9606.ENSP00000360860,9606.ENSP00000368699,9606.ENSP00000371471,9606.ENSP00000380697,…	DHX58,IFIH1,CXCL8,ISG15,IRF7
InterPro	IPR002934	Polymerase, nucleotidyl transferase domain	3	7	1.87	0.0112	9606.ENSP00000228928,9606.ENSP00000342278,9606.ENSP00000388001	OAS3,HSPB1,DHX58,BST2,OASL,RTP4,IFIH1,HERC5,MX2,OAS2,IFI6,GBP1,GBP3,IFI44,IFI44L,IFIT5,ISG15,RSAD2,DDX60,IRF7,MX1,OAS1,MOV10,IFI27
InterPro	IPR003191	Guanylate-binding protein/Atlastin, C-terminal	5	9	1.98	3.71e-05	9606.ENSP00000359488,9606.ENSP00000359490,9606.ENSP00000359497,9606.ENSP00000359504,9606.ENSP00000359512	OAS3,MT2A,BST2,OASL,KYNU,RAB20,OAS2,GBP5,GBP4,GBP2,GBP1,GBP3,IRF7,OAS1,HLA-G
InterPro	IPR006116	2-5OAS/ClassI-CCAase, nucleotidyltransferase domain	4	4	2.24	8e-05	9606.ENSP00000228928,9606.ENSP00000257570,9606.ENSP00000342278,9606.ENSP00000388001	OAS3,MT2A,OASL,RAB20,OAS2,GBP5,GBP4,GBP2,GBP1,GBP3,IRF7,OAS1,HLA-G
InterPro	IPR006117	2-5-oligoadenylate synthetase, C-terminal conserved site	4	4	2.24	8e-05	9606.ENSP00000228928,9606.ENSP00000257570,9606.ENSP00000342278,9606.ENSP00000388001	OAS3,IFIH1,MX2,OAS2,IRF7,MX1,OAS1
InterPro	IPR015894	Guanylate-binding protein, N-terminal	5	11	1.9	4.01e-05	9606.ENSP00000359488,9606.ENSP00000359490,9606.ENSP00000359497,9606.ENSP00000359504,9606.ENSP00000359512	OAS3,MX2,OAS2,RSAD2,IRF7,MX1,OAS1
InterPro	IPR018952	2-5-oligoadenylate synthetase 1, domain 2/C-terminal	4	4	2.24	8e-05	9606.ENSP00000228928,9606.ENSP00000257570,9606.ENSP00000342278,9606.ENSP00000388001	OAS3,BST2,OASL,LAMP3,CXCL8,OAS2,IFIT5,ISG15,RSAD2,MX1,OAS1,IFI27
InterPro	IPR026774	2-5-oligoadenylate synthase	4	4	2.24	8e-05	9606.ENSP00000228928,9606.ENSP00000257570,9606.ENSP00000342278,9606.ENSP00000388001	GOLGA5,HSPB1,APOE,BST2,TIMM10,KYNU,GBP5,GBP4,GBP2,GBP1,GBP3,HLA-G,MME,PDGFC
InterPro	IPR027417	P-loop containing nucleoside triphosphate hydrolase	20	861	0.6	8e-05	9606.ENSP00000251642,9606.ENSP00000256722,9606.ENSP00000263642,9606.ENSP00000267328,9606.ENSP00000299759,9606.ENSP00000333657,9606.ENSP00000334563,9606.ENSP00000359488,9606.ENSP00000359490,9606.ENSP00000359497,9606.ENSP00000359504,9606.ENSP00000359512,9606.ENSP00000359783,9606.ENSP00000359787,9606.ENSP00000371897,9606.ENSP00000377344,9606.ENSP00000380150,9606.ENSP00000381601,9606.ENSP00000399797,…	CXCR1,CXCL8,MX2,MX1,ADM
InterPro	IPR030386	GB1/RHD3-type guanine nucleotide-binding (G) domain	5	11	1.9	4.01e-05	9606.ENSP00000359488,9606.ENSP00000359490,9606.ENSP00000359497,9606.ENSP00000359504,9606.ENSP00000359512	DHX58,IFIH1,CXCL8,ISG15,IRF7
InterPro	IPR036543	Guanylate-binding protein, C-terminal domain superfamily	5	10	1.94	3.71e-05	9606.ENSP00000359488,9606.ENSP00000359490,9606.ENSP00000359497,9606.ENSP00000359504,9606.ENSP00000359512	CXCL8,OAS2,IFI44L,ISG15,RSAD2
InterPro	IPR037684	Guanylate-binding protein, C-terminal	5	7	2.09	2.96e-05	9606.ENSP00000359488,9606.ENSP00000359490,9606.ENSP00000359497,9606.ENSP00000359504,9606.ENSP00000359512	USP18,HERC5,MX2,ISG15,MX1
InterPro	IPR043518	2-5-oligoadenylate synthetase, N-terminal conserved site	4	4	2.24	8e-05	9606.ENSP00000228928,9606.ENSP00000257570,9606.ENSP00000342278,9606.ENSP00000388001	OAS3,APOE,OASL,CXCL8,VNN2,MMP9,LY6E,VNN3
InterPro	IPR043519	Nucleotidyltransferase superfamily	4	23	1.48	0.0092	9606.ENSP00000228928,9606.ENSP00000257570,9606.ENSP00000342278,9606.ENSP00000388001	DHX58,IFIH1,HERC5,ISG15,IRF7
UniProt Keywords	KW-0051	Antiviral defense	20	127	1.44	2.3e-19	9606.ENSP00000228928,9606.ENSP00000251642,9606.ENSP00000252593,9606.ENSP00000257570,9606.ENSP00000263642,9606.ENSP00000264350,9606.ENSP00000333657,9606.ENSP00000342278,9606.ENSP00000342513,9606.ENSP00000359504,9606.ENSP00000359512,9606.ENSP00000359787,9606.ENSP00000360860,9606.ENSP00000368699,9606.ENSP00000371471,9606.ENSP00000377344,9606.ENSP00000380697,9606.ENSP00000381601,9606.ENSP00000388001,…	OAS3,APOE,BST2,OASL,LAMP3,CXCL8,OAS2,IFIT5,ISG15,RSAD2,MX1,OAS1,IFI27
UniProt Keywords	KW-0342	GTP-binding	11	337	0.75	0.00089	9606.ENSP00000267328,9606.ENSP00000299759,9606.ENSP00000333326,9606.ENSP00000333657,9606.ENSP00000359488,9606.ENSP00000359490,9606.ENSP00000359497,9606.ENSP00000359504,9606.ENSP00000359512,9606.ENSP00000381601,9606.ENSP00000447053	OAS3,DHX58,CMPK2,IFIH1,RAB20,DGKI,RRAD,TUBA8,MX2,MYO18B,OAS2,RYR1,GBP5,GBP4,GBP2,GBP1,GBP3,IFI44L,ARHGAP5,DDX60,MX1,OAS1,MOV10,RAB5C
UniProt Keywords	KW-0391	Immunity	24	522	0.9	1.94e-12	9606.ENSP00000228928,9606.ENSP00000251642,9606.ENSP00000252593,9606.ENSP00000257570,9606.ENSP00000263642,9606.ENSP00000264350,9606.ENSP00000265598,9606.ENSP00000312027,9606.ENSP00000333657,9606.ENSP00000342278,9606.ENSP00000342513,9606.ENSP00000359488,9606.ENSP00000359504,9606.ENSP00000359512,9606.ENSP00000360860,9606.ENSP00000368699,9606.ENSP00000371471,9606.ENSP00000377344,9606.ENSP00000380697,…	USP18,OAS3,MT2A,BST2,LAMA5,OASL,IL1RN,HERC5,CXCL8,MX2,OAS2,IFI6,XAF1,GBP5,GBP4,GBP2,GBP1,GBP3,IFIT5,MMP9,ISG15,RSAD2,IRF7,MX1,OAS1,HLA-G,IFI27
UniProt Keywords	KW-0399	Innate immunity	18	324	0.98	2.28e-10	9606.ENSP00000228928,9606.ENSP00000251642,9606.ENSP00000252593,9606.ENSP00000257570,9606.ENSP00000263642,9606.ENSP00000264350,9606.ENSP00000333657,9606.ENSP00000342278,9606.ENSP00000342513,9606.ENSP00000360860,9606.ENSP00000368699,9606.ENSP00000371471,9606.ENSP00000377344,9606.ENSP00000380697,9606.ENSP00000381601,9606.ENSP00000388001,9606.ENSP00000440428,9606.ENSP00000483430	USP18,OAS3,MT2A,DHX58,BST2,LAMA5,OASL,IL1RN,IFIH1,HERC6,HERC5,CXCR1,CXCL8,TUBA8,MX2,OAS2,IFI6,CTSL,XAF1,GBP5,GBP4,GBP2,GBP1,GBP3,IFIT5,MMP9,ISG15,KBTBD7,RSAD2,CARD11,IRF7,MX1,RASGRP3,PRR5,OAS1,HLA-G,MME,FBXO32,CLEC4C,RAB5C,IFI27
Pfam	PF02263	Guanylate-binding protein, N-terminal domain	5	11	1.9	4.09e-05	9606.ENSP00000359488,9606.ENSP00000359490,9606.ENSP00000359497,9606.ENSP00000359504,9606.ENSP00000359512	OAS3,TNFSF10,IFIH1,CXCL8,MX2,OAS2,RSAD2,IRF7,MX1,OAS1
Pfam	PF02841	Guanylate-binding protein, C-terminal domain	5	9	1.98	3.78e-05	9606.ENSP00000359488,9606.ENSP00000359490,9606.ENSP00000359497,9606.ENSP00000359504,9606.ENSP00000359512	OAS3,DHX58,APOE,CMPK2,IFIH1,RAB20,DGKI,RRAD,TUBA8,MX2,MYO18B,OAS2,CTSL,RYR1,GBP5,GBP4,GBP2,GBP1,GBP3,IFI44L,GPNMB,ARHGAP5,DDX60,MX1,OAS1,MOV10,RAB5C
Pfam	PF10421	2-5-oligoadenylate synthetase 1, domain 2, C-terminus	4	4	2.24	8.14e-05	9606.ENSP00000228928,9606.ENSP00000257570,9606.ENSP00000342278,9606.ENSP00000388001	OAS3,DHX58,CMPK2,IFIH1,RAB20,DGKI,RRAD,TUBA8,MX2,MYO18B,OAS2,RYR1,GBP5,GBP4,GBP2,GBP1,GBP3,IFI44L,ARHGAP5,DDX60,MX1,OAS1,MOV10,RAB5C
WikiPathways	WP3865	Novel intracellular components of RIG-I-like receptor (RLR) pathway	5	59	1.17	0.0113	9606.ENSP00000251642,9606.ENSP00000263642,9606.ENSP00000306512,9606.ENSP00000368699,9606.ENSP00000380697	DHX58,IFIH1,IFIT5,DDX60,PNPT1
WikiPathways	WP4300	Extracellular vesicles in the crosstalk of cardiac cells	3	18	1.46	0.0257	9606.ENSP00000248553,9606.ENSP00000361405,9606.ENSP00000378517	HSPB1,DHX58,APOE,BST2,LAMA5,IL1RN,IFIH1,HERC5,CXCL8,OAS2,CTSL,RYR1,G0S2,GBP5,GBP1,MMP9,SPRY2,ISG15,NKX3-1,GPNMB,RSAD2,PLXNA1,DDX60,SPP1,CARD11,IRF7,ZFP36L1,MOV10,HLA-G,PTPRG,MME,PDGFC,FBXO32,SMTNL1,ADM
WikiPathways	WP4341	Non-genomic actions of 1,25 dihydroxyvitamin D3	5	71	1.09	0.0133	9606.ENSP00000306512,9606.ENSP00000342278,9606.ENSP00000359787,9606.ENSP00000368699,9606.ENSP00000371471	HSPB1,DHX58,BST2,IFIH1,HERC5,GBP5,GBP1,ISG15,GPNMB,RSAD2,DDX60,CARD11,IRF7,HLA-G
WikiPathways	WP4868	Type I interferon induction and signaling during SARS-CoV-2 infection	5	31	1.45	0.0013	9606.ENSP00000228928,9606.ENSP00000263642,9606.ENSP00000342278,9606.ENSP00000380697,9606.ENSP00000388001	USP18,DHX58,APOE,HERC5,GBP5,DDX60,CARD11,IRF7,HLA-G,CLEC4C
WikiPathways	WP4880	Host-pathogen interaction of human coronaviruses - interferon induction	4	33	1.32	0.0133	9606.ENSP00000228928,9606.ENSP00000263642,9606.ENSP00000342278,9606.ENSP00000388001	OAS3,CXCL8,OAS2,GBP5,GBP4,GBP2,GBP1,GBP3,IRF7,OAS1
WikiPathways	WP619	Type II interferon signaling (IFNG)	4	37	1.27	0.0133	9606.ENSP00000342513,9606.ENSP00000359504,9606.ENSP00000368699,9606.ENSP00000388001	BST2,LAMP3,SECTM1,CD7,HLA-G,MME,CLEC4C

## Sheet: Eosinophil_Enrichment_Down
#category	term ID	term description	observed gene count	background gene count	strength	false discovery rate	matching proteins in your network (IDs)	matching proteins in your network (labels)
DISEASES	DOID:0060032	Autoimmune disease of musculoskeletal system	7	170	1.07	0.0057	9606.ENSP00000225831,9606.ENSP00000279873,9606.ENSP00000339398,9606.ENSP00000351497,9606.ENSP00000353099,9606.ENSP00000364080,9606.ENSP00000364597	CCL2,ARID5B,HLA-DQA1,FCGR2B,HLA-DRB1,HLA-DQB1,PADI4
DISEASES	DOID:10608	Celiac disease	3	11	1.89	0.0102	9606.ENSP00000339398,9606.ENSP00000353099,9606.ENSP00000364080	HLA-DQA1,HLA-DRB1,HLA-DQB1
DISEASES	DOID:7148	Rheumatoid arthritis	6	71	1.39	0.0012	9606.ENSP00000279873,9606.ENSP00000339398,9606.ENSP00000351497,9606.ENSP00000353099,9606.ENSP00000364080,9606.ENSP00000364597	ARID5B,HLA-DQA1,FCGR2B,HLA-DRB1,HLA-DQB1,PADI4
DISEASES	DOID:8881	Rosacea	3	6	2.16	0.0057	9606.ENSP00000339398,9606.ENSP00000353099,9606.ENSP00000364080	HLA-DQA1,HLA-DRB1,HLA-DQB1
DISEASES	DOID:8986	Narcolepsy	3	11	1.89	0.0102	9606.ENSP00000339398,9606.ENSP00000353099,9606.ENSP00000364080	HLA-DQA1,HLA-DRB1,HLA-DQB1
DISEASES	DOID:986	Alopecia areata	4	46	1.4	0.0147	9606.ENSP00000225831,9606.ENSP00000339398,9606.ENSP00000353099,9606.ENSP00000364080	CCL2,HLA-DQA1,HLA-DRB1,HLA-DQB1
GO Component	GO:0030669	Clathrin-coated endocytic vesicle membrane	4	35	1.52	0.0168	9606.ENSP00000230990,9606.ENSP00000339398,9606.ENSP00000353099,9606.ENSP00000364080	HBEGF,HLA-DQA1,HLA-DRB1,HLA-DQB1
GO Function	GO:0032395	MHC class II receptor activity	3	9	1.98	0.0277	9606.ENSP00000339398,9606.ENSP00000353099,9606.ENSP00000364080	HLA-DQA1,HLA-DRB1,HLA-DQB1
GO Component	GO:0042613	MHC class II protein complex	3	14	1.79	0.0222	9606.ENSP00000339398,9606.ENSP00000353099,9606.ENSP00000364080	HLA-DQA1,HLA-DRB1,HLA-DQB1
GO Component	GO:0071556	Integral component of lumenal side of endoplasmic reticulum membrane	3	26	1.52	0.0463	9606.ENSP00000339398,9606.ENSP00000353099,9606.ENSP00000364080	HLA-DQA1,HLA-DRB1,HLA-DQB1
Reactome	HSA-9031628	NGF-stimulated transcription	4	39	1.47	0.0319	9606.ENSP00000239938,9606.ENSP00000242480,9606.ENSP00000310170,9606.ENSP00000318057	EGR1,EGR2,FOSL1,EGR3
InterPro	IPR021849	Early growth response, N-terminal	3	3	2.46	0.0053	9606.ENSP00000239938,9606.ENSP00000242480,9606.ENSP00000318057	EGR1,EGR2,EGR3
UniProt Keywords	KW-1015	Disulfide bond	25	3304	0.34	0.0473	9606.ENSP00000225831,9606.ENSP00000230990,9606.ENSP00000253109,9606.ENSP00000255380,9606.ENSP00000260126,9606.ENSP00000268150,9606.ENSP00000302324,9606.ENSP00000328230,9606.ENSP00000328359,9606.ENSP00000329214,9606.ENSP00000339398,9606.ENSP00000342570,9606.ENSP00000351497,9606.ENSP00000353099,9606.ENSP00000364080,9606.ENSP00000383923,9606.ENSP00000399229,9606.ENSP00000402584,9606.ENSP00000417138,…	CCL2,HBEGF,ANGPTL6,CHRM3,SLCO5A1,MFGE8,RNASE3,FFAR3,DEFA3,ST6GALNAC3,HLA-DQA1,TREML4,FCGR2B,HLA-DRB1,HLA-DQB1,LIPN,MXRA8,MDGA1,PLTP,SORCS2,NTRK1,MGAM,LOC93432,CCL3,CCL3L3
Pfam	PF11928	Domain of unknown function (DUF3446)	3	3	2.46	0.0027	9606.ENSP00000239938,9606.ENSP00000242480,9606.ENSP00000318057	EGR1,EGR2,EGR3

## Sheet: Monocyte_Enrichment_Up
#category	term ID	term description	observed gene count	background gene count	strength	false discovery rate	matching proteins in your network (IDs)	matching proteins in your network (labels)
STRING clusters	CL:19391	Interferon alpha/beta signaling, and ISG15-protein conjugation	4	36	1.57	0.0282	9606.ENSP00000215794,9606.ENSP00000359787,9606.ENSP00000371471,9606.ENSP00000483430	USP18,IFI44L,RSAD2,IFI27
KEGG	hsa01523	Antifolate resistance	3	31	1.51	0.0243	9606.ENSP00000263341,9606.ENSP00000377284,9606.ENSP00000385675	IL1B,FOLR1,IL6
KEGG	hsa05143	African trypanosomiasis	3	36	1.44	0.0245	9606.ENSP00000263341,9606.ENSP00000385675,9606.ENSP00000430950	IL1B,IL6,IDO1
KEGG	hsa05323	Rheumatoid arthritis	5	85	1.29	0.0025	9606.ENSP00000263341,9606.ENSP00000322788,9606.ENSP00000363976,9606.ENSP00000385675,9606.ENSP00000477908	IL1B,MMP1,HLA-DMA,IL6,CCL3
KEGG	hsa05332	Graft-versus-host disease	3	36	1.44	0.0245	9606.ENSP00000263341,9606.ENSP00000363976,9606.ENSP00000385675	IL1B,HLA-DMA,IL6
Pfam	PF08205	CD80-like C2-set immunoglobulin domain	4	42	1.5	0.0377	9606.ENSP00000305529,9606.ENSP00000341141,9606.ENSP00000370989,9606.ENSP00000390431	SIRPG,SIGLEC1,CD274,HLA-DQB2
WikiPathways	WP3617	Photodynamic therapy-induced NF-kB survival signaling	3	35	1.45	0.049	9606.ENSP00000263341,9606.ENSP00000322788,9606.ENSP00000385675	IL1B,MMP1,IL6
WikiPathways	WP4891	COVID-19 adverse outcome pathway	3	15	1.82	0.0138	9606.ENSP00000263341,9606.ENSP00000385675,9606.ENSP00000477908	IL1B,IL6,CCL3
WikiPathways	WP5113	Antiviral and anti-inflammatory effects of Nrf2 on SARS-CoV-2 pathway	3	31	1.51	0.049	9606.ENSP00000263341,9606.ENSP00000322788,9606.ENSP00000385675	IL1B,MMP1,IL6

## Sheet: Monocyte_Enrichment_Down
#category	term ID	term description	observed gene count	background gene count	strength	false discovery rate	matching proteins in your network (IDs)	matching proteins in your network (labels)
DISEASES	DOID:8881	Rosacea	3	6	2.27	0.0068	9606.ENSP00000296435,9606.ENSP00000339398,9606.ENSP00000364080	CAMP,HLA-DQA1,HLA-DQB1
GO Process	GO:0002376	Immune system process	22	2481	0.52	0.0013	9606.ENSP00000216336,9606.ENSP00000216341,9606.ENSP00000231751,9606.ENSP00000260356,9606.ENSP00000296435,9606.ENSP00000305416,9606.ENSP00000307305,9606.ENSP00000308782,9606.ENSP00000309124,9606.ENSP00000328359,9606.ENSP00000330959,9606.ENSP00000339398,9606.ENSP00000355437,9606.ENSP00000362108,9606.ENSP00000364080,9606.ENSP00000386380,9606.ENSP00000386559,9606.ENSP00000386884,9606.ENSP00000391669,…	CTSG,GZMB,LTF,THBS1,CAMP,S1PR1,DDIT4,GP6,OLR1,DEFA3,IL1R2,HLA-DQA1,TRIM58,LCN2,HLA-DQB1,IL1R1,CD8A,CXCR4,BCAR1,TENM1,MGAM,MRC1
GO Component	GO:0005576	Extracellular region	24	4166	0.33	0.0237	9606.ENSP00000216336,9606.ENSP00000221399,9606.ENSP00000231751,9606.ENSP00000251582,9606.ENSP00000260356,9606.ENSP00000270328,9606.ENSP00000296435,9606.ENSP00000301202,9606.ENSP00000301455,9606.ENSP00000302100,9606.ENSP00000303766,9606.ENSP00000308782,9606.ENSP00000309124,9606.ENSP00000328359,9606.ENSP00000330959,9606.ENSP00000362108,9606.ENSP00000369927,9606.ENSP00000386380,9606.ENSP00000386559,…	CTSG,TULP2,LTF,ADAMTS2,THBS1,ADAMTS10,CAMP,LAIR2,ANGPTL4,LGALS4,HTRA3,GP6,OLR1,DEFA3,IL1R2,LCN2,AKR1C3,IL1R1,CD8A,CXCR4,TENM1,MGAM,RNASE4,FCGBP
GO Process	GO:0006952	Defense response	15	1296	0.63	0.005	9606.ENSP00000216336,9606.ENSP00000216341,9606.ENSP00000231751,9606.ENSP00000260356,9606.ENSP00000296435,9606.ENSP00000307305,9606.ENSP00000309124,9606.ENSP00000328359,9606.ENSP00000339398,9606.ENSP00000355437,9606.ENSP00000362108,9606.ENSP00000364080,9606.ENSP00000386380,9606.ENSP00000386884,9606.ENSP00000455897	CTSG,GZMB,LTF,THBS1,CAMP,DDIT4,OLR1,DEFA3,HLA-DQA1,TRIM58,LCN2,HLA-DQB1,IL1R1,CXCR4,MRC1
GO Process	GO:0006955	Immune response	18	1588	0.62	0.0013	9606.ENSP00000216336,9606.ENSP00000216341,9606.ENSP00000231751,9606.ENSP00000260356,9606.ENSP00000296435,9606.ENSP00000309124,9606.ENSP00000328359,9606.ENSP00000330959,9606.ENSP00000339398,9606.ENSP00000355437,9606.ENSP00000362108,9606.ENSP00000364080,9606.ENSP00000386380,9606.ENSP00000386559,9606.ENSP00000386884,9606.ENSP00000403954,9606.ENSP00000447378,9606.ENSP00000455897	CTSG,GZMB,LTF,THBS1,CAMP,OLR1,DEFA3,IL1R2,HLA-DQA1,TRIM58,LCN2,HLA-DQB1,IL1R1,CD8A,CXCR4,TENM1,MGAM,MRC1
GO Process	GO:0009605	Response to external stimulus	20	2310	0.5	0.005	9606.ENSP00000216336,9606.ENSP00000216341,9606.ENSP00000231751,9606.ENSP00000260356,9606.ENSP00000296435,9606.ENSP00000297991,9606.ENSP00000305416,9606.ENSP00000307305,9606.ENSP00000328359,9606.ENSP00000334329,9606.ENSP00000339398,9606.ENSP00000339587,9606.ENSP00000355437,9606.ENSP00000359532,9606.ENSP00000362108,9606.ENSP00000364080,9606.ENSP00000369927,9606.ENSP00000386884,9606.ENSP00000391669,…	CTSG,GZMB,LTF,THBS1,CAMP,AQP3,S1PR1,DDIT4,DEFA3,UNC5B,HLA-DQA1,DFNA5,TRIM58,NTSR1,LCN2,HLA-DQB1,AKR1C3,CXCR4,BCAR1,MRC1
GO Component	GO:0009986	Cell surface	11	824	0.69	0.0196	9606.ENSP00000216223,9606.ENSP00000216336,9606.ENSP00000231751,9606.ENSP00000260356,9606.ENSP00000305416,9606.ENSP00000308782,9606.ENSP00000359532,9606.ENSP00000386380,9606.ENSP00000386559,9606.ENSP00000386884,9606.ENSP00000455897	IL2RB,CTSG,LTF,THBS1,S1PR1,GP6,NTSR1,IL1R1,CD8A,CXCR4,MRC1
GO Component	GO:0031410	Cytoplasmic vesicle	18	2386	0.44	0.0196	9606.ENSP00000216223,9606.ENSP00000216336,9606.ENSP00000231751,9606.ENSP00000246070,9606.ENSP00000260356,9606.ENSP00000295987,9606.ENSP00000296435,9606.ENSP00000305416,9606.ENSP00000309124,9606.ENSP00000328359,9606.ENSP00000339398,9606.ENSP00000355387,9606.ENSP00000362108,9606.ENSP00000364080,9606.ENSP00000378313,9606.ENSP00000386884,9606.ENSP00000447378,9606.ENSP00000455897	IL2RB,CTSG,LTF,LAMP5,THBS1,SYN1,CAMP,S1PR1,OLR1,DEFA3,HLA-DQA1,SCAMP5,LCN2,HLA-DQB1,RAB3IL1,CXCR4,MGAM,MRC1
GO Process	GO:0050832	Defense response to fungus	4	48	1.49	0.03	9606.ENSP00000216336,9606.ENSP00000231751,9606.ENSP00000296435,9606.ENSP00000328359	CTSG,LTF,CAMP,DEFA3
GO Component	GO:0098552	Side of membrane	9	531	0.8	0.0196	9606.ENSP00000216223,9606.ENSP00000260356,9606.ENSP00000305416,9606.ENSP00000339398,9606.ENSP00000359532,9606.ENSP00000364080,9606.ENSP00000386380,9606.ENSP00000386559,9606.ENSP00000386884	IL2RB,THBS1,S1PR1,HLA-DQA1,NTSR1,HLA-DQB1,IL1R1,CD8A,CXCR4
GO Component	GO:0099503	Secretory vesicle	12	1010	0.64	0.0196	9606.ENSP00000216336,9606.ENSP00000231751,9606.ENSP00000246070,9606.ENSP00000260356,9606.ENSP00000295987,9606.ENSP00000296435,9606.ENSP00000309124,9606.ENSP00000328359,9606.ENSP00000355387,9606.ENSP00000362108,9606.ENSP00000378313,9606.ENSP00000447378	CTSG,LTF,LAMP5,THBS1,SYN1,CAMP,OLR1,DEFA3,SCAMP5,LCN2,RAB3IL1,MGAM
GO Function	GO:0140375	Immune receptor activity	6	132	1.22	0.0062	9606.ENSP00000216223,9606.ENSP00000330959,9606.ENSP00000339398,9606.ENSP00000364080,9606.ENSP00000386380,9606.ENSP00000386884	IL2RB,IL1R2,HLA-DQA1,HLA-DQB1,IL1R1,CXCR4
COMPARTMENTS	GOCC:0005576	Extracellular region	17	2035	0.49	0.0063	9606.ENSP00000216336,9606.ENSP00000216341,9606.ENSP00000231751,9606.ENSP00000251582,9606.ENSP00000260356,9606.ENSP00000270328,9606.ENSP00000296435,9606.ENSP00000301202,9606.ENSP00000301455,9606.ENSP00000308782,9606.ENSP00000309124,9606.ENSP00000328359,9606.ENSP00000362108,9606.ENSP00000386559,9606.ENSP00000386884,9606.ENSP00000447378,9606.ENSP00000452245	CTSG,GZMB,LTF,ADAMTS2,THBS1,ADAMTS10,CAMP,LAIR2,ANGPTL4,GP6,OLR1,DEFA3,LCN2,CD8A,CXCR4,MGAM,RNASE4
COMPARTMENTS	GOCC:0005615	Extracellular space	11	985	0.62	0.0134	9606.ENSP00000216336,9606.ENSP00000231751,9606.ENSP00000260356,9606.ENSP00000296435,9606.ENSP00000301455,9606.ENSP00000308782,9606.ENSP00000328359,9606.ENSP00000362108,9606.ENSP00000386559,9606.ENSP00000386884,9606.ENSP00000447378	CTSG,LTF,THBS1,CAMP,ANGPTL4,GP6,DEFA3,LCN2,CD8A,CXCR4,MGAM
COMPARTMENTS	GOCC:0005886	Plasma membrane	26	3531	0.43	0.00036	9606.ENSP00000216223,9606.ENSP00000216336,9606.ENSP00000216341,9606.ENSP00000216446,9606.ENSP00000222115,9606.ENSP00000246070,9606.ENSP00000260356,9606.ENSP00000297991,9606.ENSP00000302100,9606.ENSP00000305416,9606.ENSP00000308782,9606.ENSP00000309124,9606.ENSP00000309714,9606.ENSP00000323606,9606.ENSP00000330959,9606.ENSP00000339398,9606.ENSP00000339587,9606.ENSP00000355387,9606.ENSP00000359532,…	IL2RB,CTSG,GZMB,PLEK2,HAS1,LAMP5,THBS1,AQP3,LGALS4,S1PR1,GP6,OLR1,SH3PXD2B,OR6C2,IL1R2,HLA-DQA1,DFNA5,SCAMP5,NTSR1,HLA-DQB1,IL1R1,CD8A,CXCR4,TENM1,MGAM,MRC1
COMPARTMENTS	GOCC:0005893	interleukin-2 receptor complex	2	6	2.09	0.0382	9606.ENSP00000216223,9606.ENSP00000386559	IL2RB,CD8A
COMPARTMENTS	GOCC:0031410	Cytoplasmic vesicle	17	1709	0.56	0.0012	9606.ENSP00000216336,9606.ENSP00000231751,9606.ENSP00000246070,9606.ENSP00000260356,9606.ENSP00000295987,9606.ENSP00000296435,9606.ENSP00000305416,9606.ENSP00000309124,9606.ENSP00000328359,9606.ENSP00000339398,9606.ENSP00000355387,9606.ENSP00000362108,9606.ENSP00000364080,9606.ENSP00000378313,9606.ENSP00000386884,9606.ENSP00000447378,9606.ENSP00000455897	CTSG,LTF,LAMP5,THBS1,SYN1,CAMP,S1PR1,OLR1,DEFA3,HLA-DQA1,SCAMP5,LCN2,HLA-DQB1,RAB3IL1,CXCR4,MGAM,MRC1
COMPARTMENTS	GOCC:0031982	Vesicle	18	2051	0.51	0.0019	9606.ENSP00000216336,9606.ENSP00000231751,9606.ENSP00000246070,9606.ENSP00000260356,9606.ENSP00000295987,9606.ENSP00000296435,9606.ENSP00000305416,9606.ENSP00000308782,9606.ENSP00000309124,9606.ENSP00000328359,9606.ENSP00000339398,9606.ENSP00000355387,9606.ENSP00000362108,9606.ENSP00000364080,9606.ENSP00000378313,9606.ENSP00000386884,9606.ENSP00000447378,9606.ENSP00000455897	CTSG,LTF,LAMP5,THBS1,SYN1,CAMP,S1PR1,GP6,OLR1,DEFA3,HLA-DQA1,SCAMP5,LCN2,HLA-DQB1,RAB3IL1,CXCR4,MGAM,MRC1
COMPARTMENTS	GOCC:0034774	Secretory granule lumen	6	230	0.98	0.0134	9606.ENSP00000216336,9606.ENSP00000231751,9606.ENSP00000260356,9606.ENSP00000296435,9606.ENSP00000328359,9606.ENSP00000362108	CTSG,LTF,THBS1,CAMP,DEFA3,LCN2
COMPARTMENTS	GOCC:0071944	Cell periphery	27	3688	0.43	0.00036	9606.ENSP00000216223,9606.ENSP00000216336,9606.ENSP00000216341,9606.ENSP00000216446,9606.ENSP00000222115,9606.ENSP00000246070,9606.ENSP00000260356,9606.ENSP00000297991,9606.ENSP00000302100,9606.ENSP00000305416,9606.ENSP00000308782,9606.ENSP00000309124,9606.ENSP00000309714,9606.ENSP00000323606,9606.ENSP00000330959,9606.ENSP00000339398,9606.ENSP00000339587,9606.ENSP00000354498,9606.ENSP00000355387,…	IL2RB,CTSG,GZMB,PLEK2,HAS1,LAMP5,THBS1,AQP3,LGALS4,S1PR1,GP6,OLR1,SH3PXD2B,OR6C2,IL1R2,HLA-DQA1,DFNA5,PHLDB1,SCAMP5,NTSR1,HLA-DQB1,IL1R1,CD8A,CXCR4,TENM1,MGAM,MRC1
COMPARTMENTS	GOCC:0099503	Secretory vesicle	10	785	0.67	0.0134	9606.ENSP00000216336,9606.ENSP00000231751,9606.ENSP00000260356,9606.ENSP00000295987,9606.ENSP00000296435,9606.ENSP00000309124,9606.ENSP00000328359,9606.ENSP00000362108,9606.ENSP00000378313,9606.ENSP00000447378	CTSG,LTF,THBS1,SYN1,CAMP,OLR1,DEFA3,LCN2,RAB3IL1,MGAM
COMPARTMENTS	GOCC:1903561	Extracellular vesicle	7	444	0.76	0.0382	9606.ENSP00000216336,9606.ENSP00000231751,9606.ENSP00000260356,9606.ENSP00000296435,9606.ENSP00000308782,9606.ENSP00000362108,9606.ENSP00000386884	CTSG,LTF,THBS1,CAMP,GP6,LCN2,CXCR4
KEGG	hsa04640	Hematopoietic cell lineage	4	91	1.21	0.0423	9606.ENSP00000330959,9606.ENSP00000339398,9606.ENSP00000386380,9606.ENSP00000386559	IL1R2,HLA-DQA1,IL1R1,CD8A
Reactome	HSA-6803157	Antimicrobial peptides	5	87	1.33	0.0106	9606.ENSP00000216336,9606.ENSP00000231751,9606.ENSP00000296435,9606.ENSP00000328359,9606.ENSP00000362108	CTSG,LTF,CAMP,DEFA3,LCN2
UniProt Keywords	KW-0044	Antibiotic	4	77	1.28	0.0092	9606.ENSP00000216336,9606.ENSP00000231751,9606.ENSP00000296435,9606.ENSP00000328359	CTSG,LTF,CAMP,DEFA3
UniProt Keywords	KW-0325	Glycoprotein	27	4349	0.36	0.001	9606.ENSP00000216223,9606.ENSP00000216336,9606.ENSP00000216341,9606.ENSP00000231751,9606.ENSP00000246070,9606.ENSP00000251582,9606.ENSP00000260356,9606.ENSP00000270328,9606.ENSP00000295987,9606.ENSP00000297991,9606.ENSP00000301455,9606.ENSP00000305416,9606.ENSP00000308782,9606.ENSP00000309124,9606.ENSP00000323606,9606.ENSP00000330959,9606.ENSP00000334329,9606.ENSP00000359532,9606.ENSP00000362108,…	IL2RB,CTSG,GZMB,LTF,LAMP5,ADAMTS2,THBS1,ADAMTS10,SYN1,AQP3,ANGPTL4,S1PR1,GP6,OLR1,OR6C2,IL1R2,UNC5B,NTSR1,LCN2,HLA-DQB1,IL1R1,CD8A,CXCR4,TENM1,TMTC1,MGAM,MRC1
UniProt Keywords	KW-0675	Receptor	12	1422	0.49	0.0301	9606.ENSP00000216223,9606.ENSP00000301202,9606.ENSP00000305416,9606.ENSP00000308782,9606.ENSP00000309124,9606.ENSP00000323606,9606.ENSP00000330959,9606.ENSP00000334329,9606.ENSP00000359532,9606.ENSP00000386380,9606.ENSP00000386884,9606.ENSP00000455897	IL2RB,LAIR2,S1PR1,GP6,OLR1,OR6C2,IL1R2,UNC5B,NTSR1,IL1R1,CXCR4,MRC1
UniProt Keywords	KW-0720	Serine protease	4	135	1.04	0.0405	9606.ENSP00000216336,9606.ENSP00000216341,9606.ENSP00000231751,9606.ENSP00000303766	CTSG,GZMB,LTF,HTRA3
UniProt Keywords	KW-0732	Signal	24	3233	0.44	0.00032	9606.ENSP00000216223,9606.ENSP00000216336,9606.ENSP00000216341,9606.ENSP00000231751,9606.ENSP00000246070,9606.ENSP00000251582,9606.ENSP00000260356,9606.ENSP00000270328,9606.ENSP00000296435,9606.ENSP00000301202,9606.ENSP00000301455,9606.ENSP00000303766,9606.ENSP00000308782,9606.ENSP00000328359,9606.ENSP00000330959,9606.ENSP00000334329,9606.ENSP00000339398,9606.ENSP00000362108,9606.ENSP00000364080,…	IL2RB,CTSG,GZMB,LTF,LAMP5,ADAMTS2,THBS1,ADAMTS10,CAMP,LAIR2,ANGPTL4,HTRA3,GP6,DEFA3,IL1R2,UNC5B,HLA-DQA1,LCN2,HLA-DQB1,IL1R1,CD8A,RNASE4,MRC1,FCGBP
UniProt Keywords	KW-0964	Secreted	16	1818	0.51	0.0028	9606.ENSP00000221399,9606.ENSP00000231751,9606.ENSP00000251582,9606.ENSP00000260356,9606.ENSP00000270328,9606.ENSP00000296435,9606.ENSP00000301202,9606.ENSP00000301455,9606.ENSP00000303766,9606.ENSP00000309124,9606.ENSP00000328359,9606.ENSP00000330959,9606.ENSP00000362108,9606.ENSP00000386380,9606.ENSP00000386559,9606.ENSP00000452245	TULP2,LTF,ADAMTS2,THBS1,ADAMTS10,CAMP,LAIR2,ANGPTL4,HTRA3,OLR1,DEFA3,IL1R2,LCN2,IL1R1,CD8A,RNASE4
UniProt Keywords	KW-1003	Cell membrane	20	3246	0.36	0.018	9606.ENSP00000216223,9606.ENSP00000216446,9606.ENSP00000246070,9606.ENSP00000297991,9606.ENSP00000305416,9606.ENSP00000308782,9606.ENSP00000309124,9606.ENSP00000323606,9606.ENSP00000330959,9606.ENSP00000334329,9606.ENSP00000339587,9606.ENSP00000355387,9606.ENSP00000359532,9606.ENSP00000364080,9606.ENSP00000386380,9606.ENSP00000386559,9606.ENSP00000386884,9606.ENSP00000403954,9606.ENSP00000447378,…	IL2RB,PLEK2,LAMP5,AQP3,S1PR1,GP6,OLR1,OR6C2,IL1R2,UNC5B,DFNA5,SCAMP5,NTSR1,HLA-DQB1,IL1R1,CD8A,CXCR4,TENM1,MGAM,MRC1
UniProt Keywords	KW-1015	Disulfide bond	30	3304	0.53	5.13e-08	9606.ENSP00000216223,9606.ENSP00000216336,9606.ENSP00000216341,9606.ENSP00000231751,9606.ENSP00000251582,9606.ENSP00000260356,9606.ENSP00000270328,9606.ENSP00000296435,9606.ENSP00000301202,9606.ENSP00000301455,9606.ENSP00000303766,9606.ENSP00000305416,9606.ENSP00000308782,9606.ENSP00000309124,9606.ENSP00000323606,9606.ENSP00000328359,9606.ENSP00000330959,9606.ENSP00000334329,9606.ENSP00000339398,…	IL2RB,CTSG,GZMB,LTF,ADAMTS2,THBS1,ADAMTS10,CAMP,LAIR2,ANGPTL4,HTRA3,S1PR1,GP6,OLR1,OR6C2,DEFA3,IL1R2,UNC5B,HLA-DQA1,DFNA5,NTSR1,LCN2,HLA-DQB1,IL1R1,CD8A,CXCR4,TENM1,MGAM,RNASE4,MRC1
SMART	SM00209	Thrombospondin type 1 repeats	4	63	1.37	0.0233	9606.ENSP00000251582,9606.ENSP00000260356,9606.ENSP00000270328,9606.ENSP00000334329	ADAMTS2,THBS1,ADAMTS10,UNC5B
