# Supplementary material for: Innate biosignature of treatment failure in human cutaneous leishmaniasis
Source: Research Square preprint supplement (doi:10.21203/rs.3.rs-4271873/v1), 2024-05-02
Supplement: Supplementary file 2 [file 0ef0e7d7e57ef15ba1e4f4fe.xlsx]

## Sheet: Legend
Column Name	Description
top_table	Some information about the model generation.
bottom_table	1 row for each iteration of the model followed by some meta summary statistics.
true_positive	The raw number of true positives observed.
true_negative	The raw number of true negatives observed.
false_positive	The raw number of false positives observed.
false_negative	The raw number of false negatives observed; the sum of these are the number of samples in the data.
accuracy	Proportion of correct calls vs. all samples.
kappa	Cohen's kappa: (accuracy - p(correct values vs. chance)) / (1 - p(correct values vs. chance))
sensitivity	(/ true_positive (+ true_positive false_positive))
specificity	(/ true_negative (+ true_negative false_negative))
pos_pred_value	(/ (* sensitivity prevelence) (+ (* sensitivity prevelance) (* (- specificity 1) (- prevalence 1))))
neg_pred_value	(/ (* specificity (- prevalence 1)) (+ (* (- specificity 1) * (- prevalence 1)) (* specificity (- prevalence 1))))
precision	(/ true_positive (+ true_positive true_negative))
recall	(/ true_positive (+ true_positive false_negative))
f1	2 * (/ 1 (+ (/ 1 precision) (/ 1 recall)))
balanced_accuracy	(/ (+ sensitivity specificity) 2)
auc	Area under the ROC curve.

## Sheet: Sheet1
Table S9. Machine learning models for prediction of therapeutic outcome
start_genes	19923
start_samples	166	v1, v2, v3. Mo, No, Eo. Cali and Tumaco
cv filter	Top 3000 highest SD genes
remaining_genes	3000
normalization(s)	centering
uncorrelated filter	3000
partition	10X of 0.4 train
	train vs test stats
model	true_positive	true_negative	false_positive	false_negative	accuracy	kappa	sensitivity	specificity	pos_pred_value	neg_pred_value	precision	recall	f1	balanced_accuracy	auc
KNN	51.8	23.5	13.2	10.5	0.760606	0.487252	0.826684	0.66769	0.796923	0.691176	0.796923	0.826684	0.809284	0.747187	0.74405
gradient boost (xgbTree)	62.4	24.1	2.6	9.9	0.873737	0.703488	0.864959	0.909525	0.96	0.708824	0.96	0.864959	0.909193	0.887242	0.834412
GLM net	63.6	24.4	1.4	9.6	0.888889	0.73428	0.872453	0.947332	0.978462	0.717647	0.978462	0.872453	0.921431	0.909893	0.848054
random forest (ranger)	59.1	18.4	5.9	15.6	0.782828	0.482696	0.792171	0.76396	0.909231	0.541176	0.909231	0.792171	0.845949	0.778066	0.725204
start_genes	19923
start_samples	65	v1. Mo, No, Eo. Cali and Tumaco
cv filter (≥ 0.1)	Top 3000 highest SD genes
remaining_genes	3000
normalization(s)	centering
uncorrelated filter (0.95)	3000
partition	10X of 0.4 train
	train vs test stats
model	true_positive	true_negative	false_positive	false_negative	accuracy	kappa	sensitivity	specificity	pos_pred_value	neg_pred_value	precision	recall	f1	balanced_accuracy	auc
KNN	19.6	4.1	6.4	7.9	0.623684	0.0921225	0.717724	0.383818	0.726496	0.37963	0.753846	0.717724	0.729026	0.552633	0.547756
gradient boost (xgbTree)	24.1	4.5	1.9	7.5	0.752632	0.344495	0.763638	0.736569	0.926923	0.375	0.926923	0.763638	0.83627	0.750104	0.650962
GLM net	25.1	2.7	0.9	9.3	0.731579	0.208135	0.738383	0.804274	0.942308	0.375	0.965385	0.738383	0.832675	0.789386	0.595192
random forest (ranger)	24.2	4.2	1.8	7.8	0.747368	0.319672	0.758091	0.712262	0.930769	0.35	0.930769	0.758091	0.834566	0.735177	0.640385
