# Supplementary material for: Innate biosignature of treatment failure in human cutaneous leishmaniasis
Source: Research Square preprint supplement (doi:10.21203/rs.3.rs-4271873/v1), 2024-05-02
Supplement: Supplementary file 3 [file 448b3a7a207dd1296e05f465.xlsx]

## Sheet: Hoja1
Table S2. Samples analyzed and associated metadata
TMRC identifier	Tube Label (origin)	Sample name	Sample collection date	Cell source	Clinical presentation	Visit number	Final Outcome	Index	Drug	total reads	trimmed reads	percent kept	hisat single mapped	hisat multi mapped	hisat mapping rate	hisat_lp single mapped	hisat_lp multi mapped	parasite mapping rate	parasite_host_ratio	clinic
TMRC30156	su1154	1154bp1	2016-02-04	Biopsy	CL	1	cure	11	Antimony	15243638	11503891	0.754668	9915461	744849	0.92667	68505	5976	0.00647442	0.00698676	Cali
TMRC30185	su1154	1154m1	2016-02-04	Monocytes	CL	1	cure	11	Antimony	19117312	18197217	0.951871	17105582	745404	0.980973	31	10	2.25309e-06	2.29679e-06	Cali
TMRC30186	su1154	1154n1	2016-02-04	Neutrophils	CL	1	cure	12	Antimony	27697512	25775256	0.930598	24125374	1017894	0.975481	1395	103	5.81178e-05	5.95786e-05	Cali
TMRC30148	su1168	1168m1	2016-09-13	Monocytes	CL	1	Cure	1	Antimony	25193554	22630683	0.898273	21084100	906289	0.971707	1202	66	5.60301e-05	5.76616e-05	Cali
TMRC30149	su1168	1168n1	2016-09-13	Neutrophils	CL	1	Cure	2	Antimony	30529038	27964733	0.916004	26000019	1103570	0.969206	6228	336	0.000234724	0.000242182	Cali
TMRC30234	su1174	1174m1	2017-01-01	Monocytes	CL	1	cure	8	antimony	18580980	17728974	0.954146	16635575	752169	0.980753	51	4	3.10227e-06	3.16315e-06	Cali
TMRC30235	su1174	1174n1	2017-01-01	Neutrophils	CL	1	cure	9	antimony	32070326	30389776	0.947598	20161297	878025	0.692316	46	20	2.17178e-06	3.13698e-06	Cali
TMRC30225	su1175	1175m1	2017-01-26	Monocytes	CL	1	cure	25	antimony	34978361	33362039	0.953791	29861808	2896254	0.981896	958	8	2.89551e-05	2.94889e-05	Cali
TMRC30226	su1175	1175n1	2017-01-26	Neutrophils	CL	1	cure	27	antimony	41433983	39462832	0.952427	36690316	1752908	0.974163	203	5	5.27078e-06	5.41058e-06	Cali
TMRC30138	su1168	1168e1	2016-09-13	Eosinophils	CL	1	Cure	3	Antimony	20599430	19724719	0.957537	18515855	690695	0.97373	336	26	1.83526e-05	1.88477e-05	Cali
TMRC30210	su1176	1176n1	2017-02-02	Neutrophils	CL	1	cure	2	antimony	27576509	26407334	0.957603	24741057	1035444	0.976111	60	19	2.99159e-06	3.06481e-06	Cali
TMRC30209	su1176	1176m1	2017-02-02	Monocytes	CL	1	cure	1	antimony	32070326	30389776	0.947598	28409177	1322314	0.978339	119	9	4.21194e-06	4.3052e-06	Cali
TMRC30275	su1195	1195n1	2017-10-11	Neutrophils	CL	1	Cure	27	Antimony	32862567	30335866	0.923113	28423804	1242340	0.977923	90	48	4.54907e-06	4.65177e-06	Cali
TMRC30273	su1195	1195m1	2017-10-11	Monocytes	CL	1	Cure	25	Antimony	30159639	27884027	0.924548	26127244	1179082	0.979282	51	69	4.30354e-06	4.39459e-06	Cali
TMRC30227	su1175	1175e1	2017-01-26	Eosinophils	CL	1	cure	1	antimony	32002060	30133304	0.941605	28273042	1156081	0.976631	120	14	4.44691e-06	4.55331e-06	Cali
TMRC30240	su1196	1196n1	2017-10-19	Neutrophils	CL	1	cure	4	Antimony	32729644	30311729	0.926125	28259387	1365759	0.977349	879	66	3.11761e-05	3.18986e-05	Cali
TMRC30239	su1196	1196m1	2017-10-19	Monocytes	CL	1	cure	3	Antimony	26111572	24290080	0.930242	22716220	1094635	0.980271	472	34	2.08315e-05	2.12508e-05	Cali
TMRC30269	su1168	1168b1	2016-09-13	Biopsy	CL	1	Cure	13	Antimony	19909153	16794761	0.84357	14108504	1401791	0.92352	212	19	1.37543e-05	1.48933e-05	Cali
TMRC30258	su1197	1197m1	2017-10-21	Monocytes	CL	1	cure	16	Antimony	20255168	17285074	0.853366	15646216	663258	0.943558	7268	588	0.000454496	0.000481683	Cali
TMRC30284	su1198	1198n1	2017-11-07	Neutrophils	CL	1	cure	14	Antimony	28592175	25536169	0.893117	23376878	1007825	0.954908	82	32	4.46426e-06	4.67506e-06	Cali
TMRC30253	su1174	1174b1	2017-01-19	Biopsy	CL	1	Cure	1	Antimony	11667860	9984673	0.855742	8599492	709947	0.932373	49599	4011	0.00536923	0.00575867	Cali
TMRC30283	su1198	1198m1	2017-11-07	Monocytes	CL	1	cure	5	Antimony	30007936	27996399	0.932966	26139178	1227660	0.977513	187	27	7.64384e-06	7.81968e-06	Cali
TMRC30103	su2065	2065n1	2015-05-20	Neutrophils	CL	1	cure	9	Antimony	120595495	94165408	0.780837	86765972	4241220	0.966461	24388	1567	0.000275632	0.000285197	Tumaco
TMRC30211	su1176	1176e1	2017-02-02	Eosinophils	CL	1	cure	3	antimony	25773814	24672566	0.957273	23324136	868274	0.980539	50	15	2.63451e-06	2.68679e-06	Cali
TMRC30080	su2065	2065m1	2015-05-20	Monocytes	CL	1	cure	8	Antimony	39604194	37444874	0.945477	34650131	1772675	0.972705	3944	297	0.00011326	0.000116438	Tumaco
TMRC30021	su2068	2068n1	2015-05-28	Neutrophils	CL	1	cure	8	Antimony	23004340	21637907	0.940601	17856669	2809053	0.95507	2350	327	0.000123718	0.000129538	Tumaco
TMRC30271	su1195	1195e1	2017-10-11	Eosinophils	CL	1	Cure	1	Antimony	22415183	20388821	0.909599	19172165	689783	0.974159	32	15	2.30518e-06	2.36633e-06	Cali
TMRC30014	su2068	2068m1	2015-05-28	Monocytes	CL	1	cure	1	Antimony	8286028	8027440	0.968792	6265092	1403305	0.955273	1998	103	0.000261727	0.000273982	Tumaco
TMRC30166	su2071	2071n1	2015-05-29	Neutrophils	CL	1	cure	11	Antimony	35751124	32911617	0.920576	30782473	1206203	0.971957	868	57	2.81056e-05	2.89165e-05	Tumaco
TMRC30257	su1197	1197e1	2017-10-21	Eosinophils	CL	1	cure	19	Antimony	27266355	25009283	0.917221	23511325	803806	0.972244	788	65	3.41073e-05	3.5081e-05	Cali
TMRC30165	su2071	2071m1	2015-05-29	Monocytes	CL	1	cure	10	Antimony	33682702	30848888	0.915867	27932451	2130022	0.974508	1303	64	4.43128e-05	4.5472e-05	Tumaco
TMRC30192	su2161	2161n1	2015-08-13	Neutrophils	CL	1	cure	21	Antimony	25971252	24189734	0.931404	22377005	1189128	0.97422	698	48	3.08395e-05	3.16556e-05	Tumaco
TMRC30281	su1198	1198e1	2017-11-07	Eosinophils	CL	1	cure	16	Antimony	18917312	16731460	0.884452	15096641	899455	0.956049	937	54	5.92297e-05	6.19526e-05	Cali
TMRC30191	su2161	2161m1	2015-08-13	Monocytes	CL	1	cure	20	Antimony	26714092	24993327	0.935586	23437374	1064487	0.980336	2530	179	0.000108389	0.000110563	Tumaco
TMRC30042	su2162	2162n1	2015-08-13	Neutrophils	CL	1	cure	22	Antimony	16124042	15143159	0.939166	12063695	1947138	0.925225	2794	272	0.000202468	0.000218831	Tumaco
TMRC30041	su2162	2162m1	2015-08-13	Monocytes	CL	1	cure	21	Antimony	10806253	10165791	0.940732	7786757	1728680	0.936025	1954	140	0.000205985	0.000220063	Tumaco
TMRC30167	su2167	2167n1	2015-10-07	Neutrophils	CL	1	cure	14	Antimony	30366872	26451066	0.87105	24700713	1005471	0.971839	1816	156	7.45528e-05	7.67131e-05	Tumaco
TMRC30029	su2068	2068e1	2015-05-28	Eosinophils	CL	1	cure	16	Antimony	17438379	16291098	0.934209	13626364	2009460	0.959777	7971	653	0.000529369	0.000551554	Tumaco
TMRC30270	su1176	1176b1	2017-02-02	Biopsy	CL	1	Cure	8	Antimony	21680529	19307724	0.890556	16676953	1702681	0.951932	397	12	2.11832e-05	2.22529e-05	Cali
TMRC30180	su2071	2071e1	2015-05-29	Eosinophils	CL	1	cure	12	Antimony	27726768	24383806	0.879432	22709869	934390	0.969671	4301	286	0.000188117	0.000194001	Tumaco
TMRC30132	su2167	2167m1	2015-10-07	Monocytes	CL	1	cure	13	Antimony	25339651	22656149	0.894099	20849359	1005729	0.964643	2397	155	0.000112641	0.000116769	Tumaco
TMRC30134	su2172	2172n1	2015-12-16	Neutrophils	CL	1	cure	25	Antimony	31852952	28919050	0.907892	26929503	1177200	0.97191	19696	1160	0.000721186	0.000742029	Tumaco
TMRC30043	su2162	2162e1	2015-08-13	Eosinophils	CL	1	cure	23	Antimony	18235882	17168709	0.941479	14015008	1969597	0.931031	3329	375	0.000215741	0.000231723	Tumaco
TMRC30168	su2167	2167e1	2015-10-07	Eosinophils	CL	1	cure	15	Antimony	27243970	23749819	0.871746	22342175	792951	0.974118	18558	1313	0.00083668	0.00085891	Tumaco
TMRC30184	su2172	2172m1	2015-12-16	Monocytes	CL	1	cure	23	Antimony	28124016	24946097	0.887003	23214430	1110045	0.975081	21667	1285	0.000920064	0.000943576	Tumaco
TMRC30174	su2173	2173m1	2016-01-02	Monocytes	CL	1	cure	5	Antimony	24137321	20520065	0.850138	18612913	884227	0.95015	1072	75	5.58965e-05	5.88291e-05	Tumaco
TMRC30175	su2173	2173n1	2016-01-02	Neutrophils	CL	1	cure	6	Antimony	28220585	24443846	0.866171	22321926	879761	0.949183	2157	157	9.4666e-05	9.97341e-05	Tumaco
TMRC30140	su1168	1168n2	2016-09-20	Neutrophils	CL	2	Cure	5	Antimony	20267623	19452618	0.959788	18011160	893222	0.971817	342	20	1.86093e-05	1.9149e-05	Cali
TMRC30150	su1168	1168m2	2016-09-20	Monocytes	CL	2	Cure	4	Antimony	28931036	26521518	0.916715	24778028	1077861	0.974902	797	58	3.2238e-05	3.30679e-05	Cali
TMRC30229	su1175	1175n2	2017-02-02	Neutrophils	CL	2	cure	3	antimony	39930158	38147366	0.955352	35490092	1849018	0.978812	84	13	2.54277e-06	2.59781e-06	Cali
TMRC30135	su2172	2172e1	2015-12-16	Eosinophils	CL	1	cure	27	Antimony	47229746	42551763	0.900953	39961863	1471297	0.973712	6377	368	0.000158513	0.000162792	Tumaco
TMRC30151	su1168	1168e2	2016-09-20	Eosinophils	CL	2	Cure	6	Antimony	32597146	29949352	0.918772	28168189	1007482	0.974167	921	37	3.19873e-05	3.28356e-05	Cali
TMRC30228	su1175	1175m2	2017-02-02	Monocytes	CL	2	cure	2	antimony	47158632	45098283	0.95631	42275328	2055173	0.982975	126	9	2.99346e-06	3.04531e-06	Cali
TMRC30213	su1176	1176n2	2017-02-09	Neutrophils	CL	2	cure	5	antimony	29039090	27836783	0.958597	26065295	1218768	0.980144	100	31	4.706e-06	4.80134e-06	Cali
TMRC30230	su1175	1175e2	2017-02-02	Eosinophils	CL	2	cure	4	antimony	27318593	26005212	0.951924	24529174	968824	0.980496	64	3	2.57641e-06	2.62766e-06	Cali
TMRC30212	su1176	1176m2	2017-02-09	Monocytes	CL	2	cure	4	antimony	27195746	25981929	0.955367	24443969	1085721	0.982594	85	13	3.77185e-06	3.83867e-06	Cali
TMRC30272	su1195	1195e2	2017-10-18	Eosinophils	CL	2	Cure	7	Antimony	33305700	30812803	0.925151	28884236	1288181	0.979217	219	14	7.56179e-06	7.72228e-06	Cali
TMRC30277	su1196	1196e2	2017-10-26	Eosinophils	CL	2	Cure	18	Antimony	24040084	21480736	0.893538	19733031	767920	0.954388	142	13	7.21577e-06	7.56062e-06	Cali
TMRC30274	su1195	1195m2	2017-10-18	Monocytes	CL	2	Cure	3	Antimony	29935934	27879502	0.931306	26213538	1102654	0.979795	46	39	3.04883e-06	3.11171e-06	Cali
TMRC30276	su1195	1195n2	2017-10-18	Neutrophils	CL	2	Cure	4	Antimony	33320596	30886885	0.926961	28883180	1377964	0.979741	72	33	3.3995e-06	3.4698e-06	Cali
TMRC30093	su2065	2065n2	2015-05-27	Neutrophils	CL	2	cure	11	Antimony	110454178	84148934	0.761845	78001803	3616029	0.969921	41746	2918	0.000530773	0.000547233	Tumaco
TMRC30016	su2050	2050bp1	2015-01-15	Biopsy	CL	1	cure	3	Antimony	7066208	6829962	0.966567	4746863	1438286	0.905591	237948	28594	0.0390254	0.0430939	Tumaco
TMRC30018	su2065	2065bp1	2015-05-20	Biopsy	CL	1	cure	5	Antimony	5771497	5591429	0.9688	4258522	1081039	0.954955	1791	75	0.000333725	0.000349467	Tumaco
TMRC30082	su2065	2065m2	2015-05-27	Monocytes	CL	2	cure	10	Antimony	68272277	64562511	0.945662	59862084	3315174	0.978544	6654	450	0.000110033	0.000112446	Tumaco
TMRC30031	su2068	2068n2	2015-06-04	Neutrophils	CL	2	cure	19	Antimony	6367641	6165038	0.968182	5011349	838465	0.948869	469	77	8.85639e-05	9.33363e-05	Tumaco
TMRC30030	su2068	2068m2	2015-06-04	Monocytes	CL	2	cure	18	Antimony	7196919	6934053	0.963475	5561890	1061770	0.955236	923	73	0.000143639	0.00015037	Tumaco
TMRC30195	su2071	2071n2	2015-06-05	Neutrophils	CL	2	cure	25	Antimony	32742011	30596813	0.934482	28563321	1334196	0.977145	838	78	2.99378e-05	3.0638e-05	Tumaco
TMRC30282	su1198	1198e2	2017-11-15	Eosinophils	CL	2	cure	22	Antimony	21594535	19585125	0.906948	17270006	1668089	0.966963	918	14	4.75871e-05	4.9213e-05	Cali
TMRC30158	su2162	2162n2	2015-08-20	Neutrophils	CL	2	cure	2	Antimony	23929579	20848382	0.871239	19472142	814557	0.973059	557	37	2.84914e-05	2.92803e-05	Tumaco
TMRC30194	su2071	2071m2	2015-06-05	Monocytes	CL	2	cure	23	Antimony	26689471	25146809	0.9422	23296398	1361170	0.980545	575	40	2.44564e-05	2.49416e-05	Tumaco
TMRC30020	su2068	2068bp1	2015-05-28	Biopsy	CL	1	cure	7	Antimony	10592852	10235416	0.966257	7338522	2384278	0.949917	4793	340	0.000501494	0.000527934	Tumaco
TMRC30171	su2162	2162m2	2015-08-20	Monocytes	CL	2	cure	1	Antimony	23589253	20842031	0.883539	19460915	908188	0.977309	699	53	3.60809e-05	3.69187e-05	Tumaco
TMRC30157	su2167	2167m2	2015-10-15	Monocytes	CL	2	cure	16	Antimony	27332736	24850507	0.909185	23008886	1162669	0.972679	23300	1217	0.000986579	0.00101429	Tumaco
TMRC30181	su2167	2167n2	2015-10-15	Neutrophils	CL	2	cure	18	Antimony	44387615	39282504	0.884988	36536823	1565175	0.969948	1128	75	3.06243e-05	3.15731e-05	Tumaco
TMRC30137	su2172	2172n2	2015-12-26	Neutrophils	CL	2	cure	2	Antimony	23146672	21217680	0.916662	19062619	1064117	0.948583	987	57	4.92042e-05	5.18713e-05	Tumaco
TMRC30113	su2065	2065e2	2015-05-27	Eosinophils	CL	2	cure	12	Antimony	14262771	9882095	0.692859	9390151	306350	0.981219	5127	319	0.000551098	0.000561646	Tumaco
TMRC30032	su2068	2068e2	2015-06-04	Eosinophils	CL	2	cure	20	Antimony	9920471	9577224	0.9654	7885665	1256208	0.954543	1300	90	0.000145136	0.000152048	Tumaco
TMRC30129	su2172	2172m2	2015-12-26	Monocytes	CL	2	cure	01	Antimony	24708853	21395506	0.865904	19114770	993470	0.939835	770	52	3.84193e-05	4.08788e-05	Tumaco
TMRC30143	su2173	2173n2	2016-01-08	Neutrophils	CL	2	cure	19	Antimony	53288041	50423726	0.946248	47032503	2172418	0.975829	173	31	4.04571e-06	4.14593e-06	Tumaco
TMRC30022	su2071	2071bp1	2015-05-29	Biopsy	CL	1	cure	9	Antimony	12320569	11560777	0.938331	8072490	2939574	0.952537	78589	8885	0.00756645	0.00794347	Tumaco
TMRC30153	su1168	1168n3	2016-10-04	Neutrophils	CL	3	Cure	8	Antimony	31391724	28813031	0.917854	26751858	1261490	0.972246	2229	162	8.29833e-05	8.53522e-05	Cali
TMRC30142	su2173	2173m2	2016-01-08	Monocytes	CL	2	cure	18	Antimony	36782698	34964583	0.950571	32460439	1834605	0.980851	271	10	8.0367e-06	8.1936e-06	Tumaco
TMRC30176	su1168	1168m3	2016-10-04	Monocytes	CL	3	Cure	7	Antimony	57221790	50515293	0.882798	47160810	2124954	0.97566	2113	131	4.44222e-05	4.55304e-05	Cali
TMRC30231	su1175	1175m3	2017-02-14	Monocytes	CL	3	cure	5	antimony	19803639	18993249	0.959079	17856160	819213	0.983264	34	7	2.15866e-06	2.1954e-06	Cali
TMRC30232	su1175	1175n3	2017-02-14	Neutrophils	CL	3	cure	6	antimony	22810684	21827471	0.956897	20409806	967811	0.97939	48	8	2.56557e-06	2.61956e-06	Cali
TMRC30196	su2071	2071e2	2015-06-05	Eosinophils	CL	2	cure	27	Antimony	33657214	31412417	0.933304	29659951	1038722	0.977278	1208	81	4.10347e-05	4.19888e-05	Tumaco
TMRC30215	su1176	1176n3	2017-02-22	Neutrophils	CL	3	cure	7	antimony	32441620	31021801	0.956235	29014608	1415254	0.980919	111	27	4.44848e-06	4.53502e-06	Cali
TMRC30159	su2162	2162e2	2015-08-20	Eosinophils	CL	2	cure	3	Antimony	27166098	23696539	0.872283	22421910	691392	0.975387	762	50	3.42666e-05	3.51313e-05	Tumaco
TMRC30214	su1176	1176m3	2017-02-22	Monocytes	CL	3	cure	6	antimony	24462022	23421023	0.957444	22088237	929109	0.982764	60	17	3.28764e-06	3.3453e-06	Cali
TMRC30044	su2159	2159bp1	2015-07-03	Biopsy	CL	1	cure	25	Antimony	12921744	12135904	0.939185	7845877	3423033	0.92856	104438	13239	0.0096966	0.0104426	Tumaco
TMRC30256	su1195	1195n3	2017-11-01	Neutrophils	CL	3	Cure	14	Antimony	24267822	22442511	0.924785	20830202	953547	0.970647	21448	1273	0.00101241	0.00104303	Cali
TMRC30280	su1196	1196n3	2017-11-07	Neutrophils	CL	3	cure	20	Antimony	27805895	24938493	0.896878	22793083	1299272	0.966071	249	41	1.16286e-05	1.2037e-05	Cali
TMRC30182	su2167	2167e2	2015-10-15	Eosinophils	CL	2	cure	19	Antimony	29591327	25984276	0.878104	23975582	1312860	0.973221	1259	42	5.00687e-05	5.14464e-05	Tumaco
TMRC30144	su2173	2173e2	2016-01-08	Eosinophils	CL	2	cure	20	Antimony	33923941	32299880	0.952126	30207707	1428817	0.979463	311	12	1e-05	1.02097e-05	Tumaco
TMRC30255	su1195	1195m3	2017-11-01	Monocytes	CL	3	Cure	13	Antimony	29126581	26595114	0.913087	24778498	1118018	0.973732	12035	820	0.000483359	0.000496399	Cali
TMRC30285	su1198	1198n3	2017-11-29	Neutrophils	CL	3	cure	23	Antimony	28753098	26890090	0.935207	24924679	1144109	0.969457	78	42	4.46261e-06	4.60321e-06	Cali
TMRC30233	su1175	1175e3	2017-02-14	Eosinophils	CL	3	cure	7	antimony	16250507	15514994	0.954739	14629605	591077	0.98103	50	2	3.3516e-06	3.4164e-06	Cali
TMRC30279	su1196	1196m3	2017-11-07	Monocytes	CL	3	cure	19	Antimony	23080135	20707821	0.897214	19283026	837315	0.97163	71	7	3.76669e-06	3.87667e-06	Cali
TMRC30045	su2162	2162bp1	2015-08-13	Biopsy	CL	1	cure	27	Antimony	11010603	10298249	0.935303	6030312	2878770	0.865106	4312	104	0.000428811	0.000495674	Tumaco
TMRC30169	su2065	2065m3	2015-06-12	Monocytes	CL	3	cure	7	Antimony	36643586	33326057	0.909465	31117588	1515744	0.979214	6854	409	0.000217938	0.000222564	Tumaco
TMRC30170	su2065	2065n3	2015-06-12	Neutrophils	CL	3	cure	8	Antimony	40690525	37051985	0.91058	34519753	1602074	0.974896	7251	464	0.000208221	0.000213583	Tumaco
TMRC30216	su1176	1176e3	2017-02-22	Eosinophils	CL	3	cure	8	antimony	33672049	32111702	0.95366	30228993	1274110	0.981047	90	12	3.17641e-06	3.23778e-06	Cali
TMRC30037	su2068	2068m3	2015-06-17	Monocytes	CL	3	cure	27	Antimony	7144498	6909904	0.967164	5645820	946368	0.95402	654	129	0.000113316	0.000118777	Tumaco
TMRC30027	su2068	2068n3	2015-06-17	Neutrophils	CL	3	cure	14	Antimony	39971868	37533288	0.938993	31366910	4465195	0.954675	2405	650	8.13944e-05	8.52587e-05	Tumaco
TMRC30254	su1195	1195e3	2017-11-01	Eosinophils	CL	3	Cure	23	Antimony	22836127	20498027	0.897614	18621826	1249512	0.969427	1018	15	5.03951e-05	5.19844e-05	Cali
TMRC30152	su2167	2167bp1	2015-10-07	Biopsy	CL	1	cure	7	Antimony	25896655	22350949	0.863082	18884196	2269511	0.946434	1349	38	6.20555e-05	6.55677e-05	Tumaco
TMRC30139	su2162	2162m3	2015-08-28	Monocytes	CL	3	cure	4	Antimony	25992237	24869893	0.95682	23220556	1093382	0.977645	307	21	1.31886e-05	1.34902e-05	Tumaco
TMRC30160	su2162	2162n3	2015-08-28	Neutrophils	CL	3	cure	5	Antimony	24608247	21555347	0.87594	19357964	1627476	0.973561	1235	45	5.9382e-05	6.09947e-05	Tumaco
TMRC30278	su1196	1196e3	2017-11-07	Eosinophils	CL	3	cure	21	Antimony	24326316	22101773	0.908554	20487483	1035617	0.973818	104	13	5.29369e-06	5.43602e-06	Cali
TMRC30183	su2167	2167m3	2015-10-29	Monocytes	CL	3	cure	20	Antimony	27756333	24520775	0.88343	22806355	1012376	0.971369	11625	869	0.000509527	0.000524545	Tumaco
TMRC30133	su2167	2167n3	2015-10-29	Neutrophils	CL	3	cure	21	Antimony	26885674	24408567	0.907865	22743923	903062	0.968799	2593	143	0.000112092	0.000115702	Tumaco
TMRC30164	su2065	2065e3	2015-06-12	Eosinophils	CL	3	cure	9	Antimony	29373345	26858082	0.914369	25366122	863010	0.976582	809	52	3.20574e-05	3.28261e-05	Tumaco
TMRC30172	su2172	2172m3	2016-01-08	Monocytes	CL	3	cure	3	Antimony	30186639	26039655	0.862622	23685817	1286276	0.959002	885	53	3.6022e-05	3.75619e-05	Tumaco
TMRC30146	su2173	2173n3	2016-01-21	Neutrophils	CL	3	cure	22	Antimony	26404054	25226764	0.955413	23628471	1045281	0.978078	62	17	3.13159e-06	3.20178e-06	Tumaco
TMRC30028	su2068	2068e3	2015-06-17	Eosinophils	CL	3	cure	15	Antimony	27930530	26253726	0.939965	22418594	2781376	0.959863	1833	378	8.42166e-05	8.77382e-05	Tumaco
TMRC30155	su2172	2172bp1	2015-12-16	Biopsy	CL	1	cure	10	Antimony	14987281	11028010	0.735825	9158538	1186166	0.938039	1417	54	0.000133388	0.000142198	Tumaco
TMRC30145	su2173	2173m3	2016-01-21	Monocytes	CL	3	cure	21	Antimony	23664788	22471149	0.949561	20987875	1059876	0.981158	126	8	5.9632e-06	6.07772e-06	Tumaco
TMRC30222	su1167	1167n1	2016-08-31	Neutrophils	CL	1	failure	14	antimony	27188584	25802273	0.949011	24037824	1059100	0.972663	79	7	3.33304e-06	3.42671e-06	Cali
TMRC30221	su1167	1167m1	2016-08-31	Monocytes	CL	1	failure	13	antimony	28271933	26675987	0.94355	24923262	1200526	0.9793	119	8	4.76084e-06	4.86147e-06	Cali
TMRC30052	su2052	2052n1	2015-01-15	Neutrophils	CL	1	failure	7	Antimony	2500640	1978602	0.791238	1713229	206285	0.970136	2302	138	0.00123319	0.00127116	Tumaco
TMRC30161	su2162	2162e3	2015-08-28	Eosinophils	CL	3	cure	6	Antimony	24805189	21701821	0.87489	20391553	750500	0.974206	596	43	2.94445e-05	3.02241e-05	Tumaco
TMRC30154	su2173	2173bp1	2016-01-02	Biopsy	CL	1	cure	9	Antimony	13553603	10391439	0.766692	8543416	1142988	0.932152	711	44	7.2656e-05	7.79443e-05	Tumaco
TMRC30050	su2052	2052m1	2015-01-15	Monocytes	CL	1	failure	5	Antimony	689453	539760	0.782882	464723	60070	0.972271	562	48	0.00113013	0.00116236	Tumaco
TMRC30083	su2066	2066n1	2015-05-20	Neutrophils	CL	1	failure	15	Antimony	148499128	139242322	0.937664	128755708	6350099	0.970293	36391	3004	0.000282924	0.000291586	Tumaco
TMRC30136	su2167	2167e3	2015-10-29	Eosinophils	CL	3	cure	22	Antimony	28818757	26220572	0.909844	24641339	865520	0.97278	3389	216	0.000137487	0.000141335	Tumaco
TMRC30047	su2073	2073n1	2015-05-30	Neutrophils	CL	1	failure	2	Antimony	91394186	71890527	0.786598	61698338	7845200	0.967353	60347	4175	0.000897504	0.000927793	Tumaco
TMRC30173	su2172	2172e3	2016-01-08	Eosinophils	CL	3	cure	4	Antimony	27410701	23439825	0.855134	21109881	1173373	0.950658	1919	99	8.60928e-05	9.05613e-05	Tumaco
TMRC30107	su2066	2066m1	2015-05-20	Monocytes	CL	1	failure	14	Antimony	110070493	84678027	0.769307	77682372	4486869	0.970373	18573	1220	0.000233744	0.000240881	Tumaco
TMRC30046	su2073	2073m1	2015-05-30	Monocytes	CL	1	failure	1	Antimony	50587229	39376295	0.778384	33589452	4870935	0.97674	24607	1674	0.000667432	0.000683326	Tumaco
TMRC30116	su2168	2168n1	2015-10-08	Neutrophils	CL	1	failure	25	Antimony	35976195	24822491	0.68997	23164251	1058810	0.975851	13148	719	0.000558647	0.000572471	Tumaco
TMRC30147	su2173	2173e3	2016-01-21	Eosinophils	CL	3	cure	23	Antimony	20512704	19664111	0.958631	18425312	874034	0.98145	169	12	9.20459e-06	9.37856e-06	Tumaco
TMRC30017	su2052	2052bp1	2015-01-15	Biopsy	CL	1	failure	4	Antimony	6652542	6434675	0.967251	4304053	1537141	0.907768	216858	27053	0.0379057	0.041757	Tumaco
TMRC30123	su2168	2168m1	2015-10-08	Monocytes	CL	1	failure	23	Antimony	28406758	24894046	0.876342	23307695	912942	0.972949	544	40	2.34594e-05	2.41117e-05	Tumaco
TMRC30198	su2183	2183n1	2017-02-15	Neutrophils	CL	1	failure	7	antimony	36786767	35334123	0.960512	32942008	1405668	0.972082	443	48	1.38959e-05	1.4295e-05	Tumaco
TMRC30071	su2052	2052e1	2015-01-15	Eosinophils	CL	1	failure	21	Antimony	97961566	91605458	0.935116	76232045	13161346	0.975852	56603	3674	0.000658007	0.000674289	Tumaco
TMRC30204	su2184	2184n1	2017-02-15	Neutrophils	CL	1	failure	13	antimony	37952277	35898901	0.945896	33508493	1382119	0.971913	2173	200	6.61023e-05	6.80126e-05	Tumaco
TMRC30048	su2073	2073e1	2015-05-30	Eosinophils	CL	1	failure	3	Antimony	47439158	36432362	0.767981	31720452	3744281	0.97344	20738	1430	0.00060847	0.000625072	Tumaco
TMRC30197	su2183	2183m1	2017-02-15	Monocytes	CL	1	failure	6	antimony	41352211	39674476	0.959428	36944321	1828733	0.97728	610	56	1.67866e-05	1.71769e-05	Tumaco
TMRC30203	su2184	2184m1	2017-02-15	Monocytes	CL	1	failure	12	antimony	25262110	24048970	0.951978	22448180	1032086	0.976352	292	27	1.32646e-05	1.35859e-05	Tumaco
TMRC30074	su2168	2168e1	2015-10-08	Eosinophils	CL	1	failure	1	Antimony	209258618	197452886	0.943583	156731134		0.793765	18283	1402	9.96947e-05	0.000125597	Tumaco
TMRC30238	su2188	2188n1	2017-03-01	Neutrophils	CL	1	failure	15	antimony	28142536	25962414	0.922533	24025929	1092943		643	60	2.70776e-05	2.79869e-05	Tumaco
TMRC30119	su2066	2066e2	2015-05-27	Eosinophils	CL	2	failure	19	Antimony	28579099	26072052	0.912277	24684253	745038	0.975347	757	57	3.12212e-05	3.20103e-05	Tumaco
TMRC30237	su2188	2188m1	2017-03-01	Monocytes	CL	1	failure	14	antimony	30784404	28459433	0.924476	26507757	1253614	0.975472	4474	306	0.000167958	0.000172182	Tumaco
TMRC30054	su2073	2073e2	2015-06-06	Eosinophils	CL	2	failure	10	Antimony	41541864	32608860	0.784964	28304046	3378494	0.971593	16522	1043	0.000538657	0.000554406	Tumaco
TMRC30208	su2190	2190n1	2017-04-05	Neutrophils	CL	1	failure	20	antimony	29710192	28350481	0.954234	26448084	1128118	0.972689	190	32	7.83055e-06	8.05042e-06	Tumaco
TMRC30265	su2201	2201n1	2017-09-13	Neutrophils	CL	1	failure	8	Antimony	18280915	16758806	0.916738	15437737	650879	0.96001	1049	96	6.83223e-05	7.11683e-05	Tumaco
TMRC30207	su2190	2190m1	2017-04-05	Monocytes	CL	1	failure	19	antimony	26102369	24751823	0.94826	23077592	1120629	0.977634	82	15	3.9189e-06	4.00856e-06	Tumaco
TMRC30019	su2066	2066bp1	2015-05-20	Biopsy	CL	1	failure	6	Antimony	9848643	9521651	0.966798	6745185	2301104	0.950076	7942	652	0.000902575	0.000950003	Tumaco
TMRC30264	su2201	2201m1	2017-09-13	Monocytes	CL	1	failure	7	Antimony	21862263	19806737	0.905978	18285285	880087	0.967619	710	41	3.79164e-05	3.91853e-05	Tumaco
TMRC30224	su1167	1167n2	2016-09-09	Neutrophils	CL	2	failure	16	antimony	28207903	26780982	0.949414	24895531	1188938	0.973992	57	7	2.38976e-06	2.45357e-06	Cali
TMRC30077	su2168	2168e2	2015-10-15	Eosinophils	CL	2	failure	4	Antimony	134226323	126892831	0.945365	118265784	4624686	0.968459	14598	1086	0.0001236	0.000127626	Tumaco
TMRC30058	su2052	2052n2	2015-01-22	Neutrophils	CL	2	failure	14	Antimony	13228711	10279518	0.777061	8882941	1106273	0.971759	12239	768	0.00126533	0.0013021	Tumaco
TMRC30026	su2073	2073bp1	2015-05-30	Biopsy	CL	1	failure	13	Antimony	25998738	24395772	0.938344	18292502	5094854	0.958664	17162	1446	0.000762755	0.000795644	Tumaco
TMRC30223	su1167	1167m2	2016-09-09	Monocytes	CL	2	failure	15	antimony	37007832	34956937	0.944582	32732016	1521021	0.979864	112	16	3.66165e-06	3.73689e-06	Cali
TMRC30122	su2066	2066e3	2015-06-10	Eosinophils	CL	3	failure	22	Antimony	34492498	30137748	0.873748	28504575	910935	0.976035	7078	576	0.000253967	0.000260203	Tumaco
TMRC30056	su2052	2052m2	2015-01-22	Monocytes	CL	2	failure	12	Antimony	2397697	1876370	0.782572	1616275	205270	0.970781	4069	279	0.00231724	0.00238698	Tumaco
TMRC30096	su2066	2066m2	2015-05-27	Monocytes	CL	2	failure	16	Antimony	70813078	54221553	0.7657	49683424	2909862	0.96997	22610	1538	0.000445358	0.000459146	Tumaco
TMRC30118	su2066	2066n2	2015-05-27	Neutrophils	CL	2	failure	18	Antimony	43865680	40302887	0.918779	37721844	1494642	0.973044	1278	70	3.34467e-05	3.43733e-05	Tumaco
TMRC30070	su2073	2073e3	2015-07-22	Eosinophils	CL	3	failure	18	Antimony	56052079	52359592	0.934124	46200306	4779930	0.973656	25642	1758	0.000523304	0.000537463	Tumaco
TMRC30049	su2073	2073m2	2015-06-06	Monocytes	CL	2	failure	4	Antimony	43938815	34435961	0.783725	29647817	3961010	0.975981	20660	1393	0.000640406	0.000656167	Tumaco
TMRC30053	su2073	2073n2	2015-06-06	Neutrophils	CL	2	failure	9	Antimony	48972106	38561083	0.787409	32979737	4342103	0.967863	24492	1535	0.000674955	0.000697366	Tumaco
TMRC30079	su2168	2168e3	2015-10-29	Eosinophils	CL	3	failure	7	Antimony	68476084	64952763	0.948547	60092985	2726239	0.967152	9176	619	0.000150802	0.000155924	Tumaco
TMRC30177	su2168	2168bp1	2015-10-08	Biopsy	CL	1	failure	8	Antimony	30751175	25584307	0.831978	21417009	2350959	0.929006	474403	35752	0.0199402	0.021464	Tumaco
TMRC30072	su2168	2168m2	2015-10-15	Monocytes	CL	2	failure	2	Antimony	174979705	165997522	0.948667	122772879		0.739607	57886	3155	0.000367722	0.000497186	Tumaco
TMRC30076	su2168	2168n2	2015-10-15	Neutrophils	CL	2	failure	3	Antimony	38809962	36480851	0.939987	33273945	1956551	0.965726	4504	315	0.000132097	0.000136785	Tumaco
TMRC30199	su2183	2183m2	2017-02-23	Monocytes	CL	2	failure	8	antimony	48244033	46119220	0.955957	43055584	2098849	0.979081	19809	1129	0.000453997	0.000463698	Tumaco
TMRC30200	su2183	2183n2	2017-02-23	Neutrophils	CL	2	failure	9	antimony	23907273	22837756	0.955264	21200668	1013267	0.972685	288	36	1.4187e-05	1.45854e-05	Tumaco
TMRC30217	su2190	2190m2	2017-04-12	Monocytes	CL	2	failure	9	antimony	30264748	28772289	0.950687	26872766	1278714	0.978423	53	16	2.39814e-06	2.45103e-06	Tumaco
TMRC30218	su2190	2190n2	2017-04-12	Neutrophils	CL	2	failure	10	antimony	27158142	25770712	0.948913	23986977	1063856	0.972066	72	18	3.49234e-06	3.59269e-06	Tumaco
TMRC30178	su1167	1167m3	2016-09-28	Monocytes	CL	3	failure	9	Antimony	28724441	25222898	0.878099	23489966	1104694	0.975093	870	63	3.69902e-05	3.79351e-05	Cali
TMRC30179	su1167	1167n3	2016-09-28	Neutrophils	CL	3	failure	10	Antimony	29354354	25620922	0.872815	23733935	1034169	0.966714	972	76	4.09041e-05	4.23125e-05	Cali
TMRC30241	su2183	2183b1	2017-02-15	Biopsy	CL	1	failure	5	Antimony	23120775	21077387	0.911621	18133556	1842859	0.947765	113704	11356	0.00593337	0.00626038	Tumaco
TMRC30105	su2052	2052m3	2015-02-04	Monocytes	CL	3	failure	12	Antimony	136339032	102601162	0.752544	94549351	5076828	0.971004	26033	1698	0.00027028	0.000278351	Tumaco
TMRC30094	su2052	2052n3	2015-02-04	Neutrophils	CL	3	failure	13	Antimony	182180710	137733025	0.756024	123850637	9512350	0.968272	56390	3801	0.000437012	0.000451332	Tumaco
TMRC30115	su2066	2066m3	2015-06-10	Monocytes	CL	3	failure	20	Antimony	25574813	18054800	0.70596	17084415	646664	0.98207	3535	193	0.000206482	0.000210252	Tumaco
TMRC30121	su2066	2066n3	2015-06-10	Neutrophils	CL	3	failure	21	Antimony	25114887	23070502	0.918599	21156933	1094834	0.964512	162236	13426	0.00761414	0.00789429	Tumaco
TMRC30055	su2073	2073m3	2015-07-22	Monocytes	CL	3	failure	11	Antimony	51204753	39426692	0.769981	33907074	4520170	0.97465	24689	1651	0.000668075	0.000685451	Tumaco
TMRC30068	su2073	2073n3	2015-07-22	Neutrophils	CL	3	failure	12	Antimony	46820746	43616820	0.93157	37841428	4509570	0.970979	18707	1268	0.000457966	0.000471654	Tumaco
TMRC30078	su2168	2168m3	2015-10-29	Monocytes	CL	3	failure	5	Antimony	64212226	60935376	0.948968	56259934	2819847	0.969548	6129	444	0.000107868	0.000111256	Tumaco
TMRC30088	su2168	2168n3	2015-10-29	Neutrophils	CL	3	failure	6	Antimony	78044820	60610141	0.776607	55334659	3030336	0.962958	16449	1042	0.000288582	0.000299683	Tumaco
TMRC30201	su2183	2183m3		Monocytes	CL	3	failure	10	antimony	31752164	30119698	0.948587	28052806	1321040	0.975237	327	25	1.16867e-05	1.19834e-05	Tumaco
TMRC30202	su2183	2183n3		Neutrophils	CL	3	failure	11	antimony	46320126	44134585	0.952817	40986414	1932067	0.972446	404	42	1.01055e-05	1.03918e-05	Tumaco
TMRC30205	su2184	2184m3	2017-03-08	Monocytes	CL	3	failure	14	antimony	36412037	34731625	0.95385	32423085	1544420	0.977999	461	42	1.44825e-05	1.48083e-05	Tumaco
TMRC30206	su2184	2184n3	2017-03-08	Neutrophils	CL	3	failure	15	antimony	30196391	28744897	0.951932	26878126	1114200	0.973819	298	47	1.20021e-05	1.23248e-05	Tumaco
TMRC30219	su2190	2190m3	2017-04-26	Monocytes	CL	3	failure	11	antimony	37417038	35509339	0.949015	33091782	1624630	0.97767	137	16	4.30873e-06	4.40714e-06	Tumaco
TMRC30220	su2190	2190n3	2017-04-26	Neutrophils	CL	3	failure	12	antimony	28221039	26761933	0.948297	24976040	1062911	0.972985	72	34	3.96085e-06	4.07082e-06	Tumaco
