# Supplementary material for: Innate biosignature of treatment failure in human cutaneous leishmaniasis
Source: Research Square preprint supplement (doi:10.21203/rs.3.rs-4271873/v1), 2024-05-02
Supplement: Supplementary file 4 [file 6e82daf5303b6431078ee219.xlsx]

## Sheet: Monocytes
initial_alias	name	description	ENSG ID	Module	P value
ENSG00000122729	ACO1	aconitase 1 [Source:HGNC Symbol	ENSG00000122729	pink	0.0248773
ENSG00000002586	CD99	CD99 molecule (Xg blood group) [Source:HGNC Symbol	ENSG00000002586	tan	0.0304708
ENSG00000184009	ACTG1	actin gamma 1 [Source:HGNC Symbol	ENSG00000184009	pink	0.0128346
ENSG00000119640	ACYP1	acylphosphatase 1 [Source:HGNC Symbol	ENSG00000119640	pink	0.0284465
ENSG00000162390	ACOT11	acyl-CoA thioesterase 11 [Source:HGNC Symbol	ENSG00000162390	green	0.00118209
ENSG00000141385	AFG3L2	AFG3 like matrix AAA peptidase subunit 2 [Source:HGNC Symbol	ENSG00000141385	green	0.233156
ENSG00000085662	AKR1B1	aldo-keto reductase family 1 member B [Source:HGNC Symbol	ENSG00000085662	green	0.000700461
ENSG00000189046	ALKBH2	alkB homolog 2, alpha-ketoglutarate dependent dioxygenase [Source:HGNC Symbol	ENSG00000189046	green	0.993679
ENSG00000007545	CRAMP1	cramped chromatin regulator homolog 1 [Source:HGNC Symbol	ENSG00000007545	tan	0.536748
ENSG00000166295	ANAPC16	anaphase promoting complex subunit 16 [Source:HGNC Symbol	ENSG00000166295	green	0.015077
ENSG00000100823	APEX1	apurinic/apyrimidinic endodeoxyribonuclease 1 [Source:HGNC Symbol	ENSG00000100823	green	0.487737
ENSG00000011105	TSPAN9	tetraspanin 9 [Source:HGNC Symbol	ENSG00000011105	tan	0.125178
ENSG00000142303	ADAMTS10	ADAM metallopeptidase with thrombospondin type 1 motif 10 [Source:HGNC Symbol	ENSG00000142303	pink	0.0009113
ENSG00000154736	ADAMTS5	ADAM metallopeptidase with thrombospondin type 1 motif 5 [Source:HGNC Symbol	ENSG00000154736	pink	0.324325
ENSG00000160710	ADAR	adenosine deaminase RNA specific [Source:HGNC Symbol	ENSG00000160710	pink	0.0179841
ENSG00000185100	ADSS1	adenylosuccinate synthase 1 [Source:HGNC Symbol	ENSG00000185100	pink	0.0773893
ENSG00000172493	AFF1	AF4/FMR2 family member 1 [Source:HGNC Symbol	ENSG00000172493	pink	0.000224355
ENSG00000186063	AIDA	axin interactor, dorsalization associated [Source:HGNC Symbol	ENSG00000186063	pink	0.00924648
ENSG00000185722	ANKFY1	ankyrin repeat and FYVE domain containing 1 [Source:HGNC Symbol	ENSG00000185722	pink	0.000374909
ENSG00000128272	ATF4	activating transcription factor 4 [Source:HGNC Symbol	ENSG00000128272	green	0.391636
ENSG00000152766	ANKRD22	ankyrin repeat domain 22 [Source:HGNC Symbol	ENSG00000152766	pink	0.0601548
ENSG00000048649	RSF1	remodeling and spacing factor 1 [Source:HGNC Symbol	ENSG00000048649	tan	0.0045439
ENSG00000051341	POLQ	DNA polymerase theta [Source:HGNC Symbol	ENSG00000051341	tan	0.231193
ENSG00000055070	SZRD1	SUZ RNA binding domain containing 1 [Source:HGNC Symbol	ENSG00000055070	tan	0.13372
ENSG00000128335	APOL2	apolipoprotein L2 [Source:HGNC Symbol	ENSG00000128335	pink	0.0187884
ENSG00000128284	APOL3	apolipoprotein L3 [Source:HGNC Symbol	ENSG00000128284	pink	0.00870976
ENSG00000110046	ATG2A	autophagy related 2A [Source:HGNC Symbol	ENSG00000110046	green	0.404774
ENSG00000221963	APOL6	apolipoprotein L6 [Source:HGNC Symbol	ENSG00000221963	pink	0.006172
ENSG00000163947	ARHGEF3	Rho guanine nucleotide exchange factor 3 [Source:HGNC Symbol	ENSG00000163947	pink	0.0803647
ENSG00000198520	ARMH1	armadillo like helical domain containing 1 [Source:HGNC Symbol	ENSG00000198520	pink	0.0252782
ENSG00000067365	METTL22	methyltransferase 22, Kin17 lysine [Source:HGNC Symbol	ENSG00000067365	tan	0.279506
ENSG00000070081	NUCB2	nucleobindin 2 [Source:HGNC Symbol	ENSG00000070081	tan	0.699418
ENSG00000152234	ATP5F1A	ATP synthase F1 subunit alpha [Source:HGNC Symbol	ENSG00000152234	green	0.594043
ENSG00000154518	ATP5MC3	ATP synthase membrane subunit c locus 3 [Source:HGNC Symbol	ENSG00000154518	green	0.00396516
ENSG00000073803	MAP3K13	mitogen-activated protein kinase kinase kinase 13 [Source:HGNC Symbol	ENSG00000073803	tan	0.676368
ENSG00000156411	ATP5MJ	ATP synthase membrane subunit j [Source:HGNC Symbol	ENSG00000156411	green	0.198515
ENSG00000172232	AZU1	azurocidin 1 [Source:HGNC Symbol	ENSG00000172232	green	0.107687
ENSG00000076003	MCM6	minichromosome maintenance complex component 6 [Source:HGNC Symbol	ENSG00000076003	tan	0.296602
ENSG00000105643	ARRDC2	arrestin domain containing 2 [Source:HGNC Symbol	ENSG00000105643	pink	0.024456
ENSG00000006453	BAIAP2L1	BAR/IMD domain containing adaptor protein 2 like 1 [Source:HGNC Symbol	ENSG00000006453	green	0.0731295
ENSG00000148331	ASB6	ankyrin repeat and SOCS box containing 6 [Source:HGNC Symbol	ENSG00000148331	pink	0.0972132
ENSG00000143153	ATP1B1	ATPase Na+/K+ transporting subunit beta 1 [Source:HGNC Symbol	ENSG00000143153	pink	0.000353288
ENSG00000158470	B4GALT5	beta-1,4-galactosyltransferase 5 [Source:HGNC Symbol	ENSG00000158470	pink	0.831172
ENSG00000139618	BRCA2	BRCA2 DNA repair associated [Source:HGNC Symbol	ENSG00000139618	pink	0.00482511
ENSG00000254999	BRK1	BRICK1 subunit of SCAR/WAVE actin nucleating complex [Source:HGNC Symbol	ENSG00000254999	green	0.00534384
ENSG00000145741	BTF3	basic transcription factor 3 [Source:HGNC Symbol	ENSG00000145741	green	0.0369342
ENSG00000157895	C12orf43	chromosome 12 open reading frame 43 [Source:HGNC Symbol	ENSG00000157895	green	0.00634584
ENSG00000106392	C1GALT1	core 1 synthase, glycoprotein-N-acetylgalactosamine 3-beta-galactosyltransferase 1 [Source:HGNC Symbol	ENSG00000106392	pink	2.26e-05
ENSG00000088543	C3orf18	chromosome 3 open reading frame 18 [Source:HGNC Symbol	ENSG00000088543	pink	0.00089086
ENSG00000088826	SMOX	spermine oxidase [Source:HGNC Symbol	ENSG00000088826	tan	0.136687
ENSG00000145349	CAMK2D	calcium/calmodulin dependent protein kinase II delta [Source:HGNC Symbol	ENSG00000145349	pink	0.024769
ENSG00000157617	C2CD2	C2 calcium dependent domain containing 2 [Source:HGNC Symbol	ENSG00000157617	green	0.187568
ENSG00000089012	SIRPG	signal regulatory protein gamma [Source:HGNC Symbol	ENSG00000089012	grey60	0.0736717
ENSG00000136819	C9orf78	chromosome 9 open reading frame 78 [Source:HGNC Symbol	ENSG00000136819	green	0.145053
ENSG00000121594	CD80	CD80 molecule [Source:HGNC Symbol	ENSG00000121594	green	0.634252
ENSG00000106554	CHCHD3	coiled-coil-helix-coiled-coil-helix domain containing 3 [Source:HGNC Symbol	ENSG00000106554	green	0.50814
ENSG00000074201	CLNS1A	chloride nucleotide-sensitive channel 1A [Source:HGNC Symbol	ENSG00000074201	green	0.96837
ENSG00000130559	CAMSAP1	calmodulin regulated spectrin associated protein 1 [Source:HGNC Symbol	ENSG00000130559	pink	0.00183704
ENSG00000090612	ZNF268	zinc finger protein 268 [Source:HGNC Symbol	ENSG00000090612	tan	0.97602
ENSG00000158623	COPG2	COPI coat complex subunit gamma 2 [Source:HGNC Symbol	ENSG00000158623	green	0.850363
ENSG00000003400	CASP10	caspase 10 [Source:HGNC Symbol	ENSG00000003400	pink	0.0044883
ENSG00000099338	CATSPERG	cation channel sperm associated auxiliary subunit gamma [Source:HGNC Symbol	ENSG00000099338	grey60	0.283329
ENSG00000099715	PCDH11Y	protocadherin 11 Y-linked [Source:HGNC Symbol	ENSG00000099715	tan	0.00755587
ENSG00000099899	TRMT2A	tRNA methyltransferase 2 homolog A [Source:HGNC Symbol	ENSG00000099899	tan	0.20181
ENSG00000005243	COPZ2	COPI coat complex subunit zeta 2 [Source:HGNC Symbol	ENSG00000005243	green	0.0071989
ENSG00000115944	COX7A2L	cytochrome c oxidase subunit 7A2 like [Source:HGNC Symbol	ENSG00000115944	green	0.276721
ENSG00000100271	TTLL1	TTL family tubulin polyglutamylase complex subunit L1 [Source:HGNC Symbol	ENSG00000100271	tan	0.187538
ENSG00000127184	COX7C	cytochrome c oxidase subunit 7C [Source:HGNC Symbol	ENSG00000127184	green	0.885784
ENSG00000120217	CD274	CD274 molecule [Source:HGNC Symbol	ENSG00000120217	pink	0.0104678
ENSG00000100417	PMM1	phosphomannomutase 1 [Source:HGNC Symbol	ENSG00000100417	tan	0.739019
ENSG00000198087	CD2AP	CD2 associated protein [Source:HGNC Symbol	ENSG00000198087	pink	0.00197877
ENSG00000170275	CRTAP	cartilage associated protein [Source:HGNC Symbol	ENSG00000170275	green	0.0116695
ENSG00000101342	TLDC2	TBC/LysM-associated domain containing 2 [Source:HGNC Symbol	ENSG00000101342	grey60	0.450825
ENSG00000004468	CD38	CD38 molecule [Source:HGNC Symbol	ENSG00000004468	pink	0.447126
ENSG00000158825	CDA	cytidine deaminase [Source:HGNC Symbol	ENSG00000158825	pink	0.0016726
ENSG00000143126	CELSR2	cadherin EGF LAG seven-pass G-type receptor 2 [Source:HGNC Symbol	ENSG00000143126	pink	0.511407
ENSG00000213923	CSNK1E	casein kinase 1 epsilon [Source:HGNC Symbol	ENSG00000213923	green	0.000433036
ENSG00000137200	CMTR1	cap methyltransferase 1 [Source:HGNC Symbol	ENSG00000137200	pink	0.0188848
ENSG00000121552	CSTA	cystatin A [Source:HGNC Symbol	ENSG00000121552	green	0.266005
ENSG00000132676	DAP3	death associated protein 3 [Source:HGNC Symbol	ENSG00000132676	green	0.0537084
ENSG00000055130	CUL1	cullin 1 [Source:HGNC Symbol	ENSG00000055130	pink	0.00175508
ENSG00000115423	DNAH6	dynein axonemal heavy chain 6 [Source:HGNC Symbol	ENSG00000115423	green	0.249942
ENSG00000102854	MSLN	mesothelin [Source:HGNC Symbol	ENSG00000102854	grey60	0.0700135
ENSG00000102890	ELMO3	engulfment and cell motility 3 [Source:HGNC Symbol	ENSG00000102890	tan	0.0854564
ENSG00000107201	DDX58	DExD/H-box helicase 58 [Source:HGNC Symbol	ENSG00000107201	pink	0.000728625
ENSG00000104691	UBXN8	UBX domain protein 8 [Source:HGNC Symbol	ENSG00000104691	tan	0.127891
ENSG00000107099	DOCK8	dedicator of cytokinesis 8 [Source:HGNC Symbol	ENSG00000107099	green	0.00313965
ENSG00000264364	DYNLL2	dynein light chain LC8-type 2 [Source:HGNC Symbol	ENSG00000264364	green	0.0378452
ENSG00000114942	EEF1B2	eukaryotic translation elongation factor 1 beta 2 [Source:HGNC Symbol	ENSG00000114942	green	0.240665
ENSG00000143486	EIF2D	eukaryotic translation initiation factor 2D [Source:HGNC Symbol	ENSG00000143486	green	0.152241
ENSG00000137628	DDX60	DExD/H-box helicase 60 [Source:HGNC Symbol	ENSG00000137628	pink	0.00184086
ENSG00000081791	DELE1	DAP3 binding cell death enhancer 1 [Source:HGNC Symbol	ENSG00000081791	pink	0.319662
ENSG00000136986	DERL1	derlin 1 [Source:HGNC Symbol	ENSG00000136986	pink	0.00100199
ENSG00000169084	DHRSX	dehydrogenase/reductase X-linked [Source:HGNC Symbol	ENSG00000169084	pink	0.0639772
ENSG00000175390	EIF3F	eukaryotic translation initiation factor 3 subunit F [Source:HGNC Symbol	ENSG00000175390	green	0.259389
ENSG00000106603	COA1	cytochrome c oxidase assembly factor 1 [Source:HGNC Symbol	ENSG00000106603	tan	0.0354433
ENSG00000147677	EIF3H	eukaryotic translation initiation factor 3 subunit H [Source:HGNC Symbol	ENSG00000147677	green	0.0890539
ENSG00000066084	DIP2B	disco interacting protein 2 homolog B [Source:HGNC Symbol	ENSG00000066084	pink	0.0178956
ENSG00000100129	EIF3L	eukaryotic translation initiation factor 3 subunit L [Source:HGNC Symbol	ENSG00000100129	green	0.0177633
ENSG00000178607	ERN1	endoplasmic reticulum to nucleus signaling 1 [Source:HGNC Symbol	ENSG00000178607	green	0.0925752
ENSG00000182518	FAM104B	family with sequence similarity 104 member B [Source:HGNC Symbol	ENSG00000182518	green	0.327991
ENSG00000163840	DTX3L	deltex E3 ubiquitin ligase 3L [Source:HGNC Symbol	ENSG00000163840	pink	0.0360037
ENSG00000126882	FAM78A	family with sequence similarity 78 member A [Source:HGNC Symbol	ENSG00000126882	green	0.0246075
ENSG00000108774	RAB5C	RAB5C, member RAS oncogene family [Source:HGNC Symbol	ENSG00000108774	tan	0.357073
ENSG00000152767	FARP1	FERM, ARH/RhoGEF and pleckstrin domain protein 1 [Source:HGNC Symbol	ENSG00000152767	green	0.118824
ENSG00000105202	FBL	fibrillarin [Source:HGNC Symbol	ENSG00000105202	green	0.00796442
ENSG00000198019	FCGR1BP	Fc gamma receptor Ib, pseudogene [Source:HGNC Symbol	ENSG00000198019	green	0.290558
ENSG00000075618	FSCN1	fascin actin-bundling protein 1 [Source:HGNC Symbol	ENSG00000075618	green	0.951201
ENSG00000055332	EIF2AK2	eukaryotic translation initiation factor 2 alpha kinase 2 [Source:HGNC Symbol	ENSG00000055332	pink	0.0106063
ENSG00000079819	EPB41L2	erythrocyte membrane protein band 4.1 like 2 [Source:HGNC Symbol	ENSG00000079819	pink	0.793629
ENSG00000111247	RAD51AP1	RAD51 associated protein 1 [Source:HGNC Symbol	ENSG00000111247	grey60	0.00706217
ENSG00000111775	COX6A1	cytochrome c oxidase subunit 6A1 [Source:HGNC Symbol	ENSG00000111775	tan	0.7993
ENSG00000133106	EPSTI1	epithelial stromal interaction 1 [Source:HGNC Symbol	ENSG00000133106	pink	0.020482
ENSG00000183087	GAS6	growth arrest specific 6 [Source:HGNC Symbol	ENSG00000183087	green	0.0375486
ENSG00000112419	PHACTR2	phosphatase and actin regulator 2 [Source:HGNC Symbol	ENSG00000112419	grey60	0.00020883
ENSG00000182512	GLRX5	glutaredoxin 5 [Source:HGNC Symbol	ENSG00000182512	green	0.733183
ENSG00000012232	EXTL3	exostosin like glycosyltransferase 3 [Source:HGNC Symbol	ENSG00000012232	pink	0.00667913
ENSG00000113140	SPARC	secreted protein acidic and cysteine rich [Source:HGNC Symbol	ENSG00000113140	tan	0.0204382
ENSG00000137414	FAM8A1	family with sequence similarity 8 member A1 [Source:HGNC Symbol	ENSG00000137414	pink	1.12e-07
ENSG00000189369	GSPT2	G1 to S phase transition 2 [Source:HGNC Symbol	ENSG00000189369	green	0.89876
ENSG00000114735	HEMK1	HemK methyltransferase family member 1 [Source:HGNC Symbol	ENSG00000114735	tan	0.111955
ENSG00000122034	GTF3A	general transcription factor IIIA [Source:HGNC Symbol	ENSG00000122034	green	0.485157
ENSG00000115392	FANCL	FA complementation group L [Source:HGNC Symbol	ENSG00000115392	pink	0.00148604
ENSG00000174721	FGFBP3	fibroblast growth factor binding protein 3 [Source:HGNC Symbol	ENSG00000174721	pink	0.750081
ENSG00000157827	FMNL2	formin like 2 [Source:HGNC Symbol	ENSG00000157827	pink	0.0511159
ENSG00000172159	FRMD3	FERM domain containing 3 [Source:HGNC Symbol	ENSG00000172159	pink	0.0350576
ENSG00000089327	FXYD5	FXYD domain containing ion transport regulator 5 [Source:HGNC Symbol	ENSG00000089327	pink	8.72e-06
ENSG00000152795	HNRNPDL	heterogeneous nuclear ribonucleoprotein D like [Source:HGNC Symbol	ENSG00000152795	green	0.459396
ENSG00000115425	PECR	peroxisomal trans-2-enoyl-CoA reductase [Source:HGNC Symbol	ENSG00000115425	tan	0.0619708
ENSG00000188483	IER5L	immediate early response 5 like [Source:HGNC Symbol	ENSG00000188483	green	0.537786
ENSG00000116353	MECR	mitochondrial trans-2-enoyl-CoA reductase [Source:HGNC Symbol	ENSG00000116353	tan	0.348161
ENSG00000034713	GABARAPL2	GABA type A receptor associated protein like 2 [Source:HGNC Symbol	ENSG00000034713	pink	0.631396
ENSG00000178035	IMPDH2	inosine monophosphate dehydrogenase 2 [Source:HGNC Symbol	ENSG00000178035	green	0.32712
ENSG00000116717	GADD45A	growth arrest and DNA damage inducible alpha [Source:HGNC Symbol	ENSG00000116717	pink	0.346471
ENSG00000117114	ADGRL2	adhesion G protein-coupled receptor L2 [Source:HGNC Symbol	ENSG00000117114	tan	0.914513
ENSG00000117228	GBP1	guanylate binding protein 1 [Source:HGNC Symbol	ENSG00000117228	pink	0.054144
ENSG00000162645	GBP2	guanylate binding protein 2 [Source:HGNC Symbol	ENSG00000162645	pink	0.0354339
ENSG00000117226	GBP3	guanylate binding protein 3 [Source:HGNC Symbol	ENSG00000117226	pink	0.0294489
ENSG00000162267	ITIH3	inter-alpha-trypsin inhibitor heavy chain 3 [Source:HGNC Symbol	ENSG00000162267	green	0.0259844
ENSG00000162654	GBP4	guanylate binding protein 4 [Source:HGNC Symbol	ENSG00000162654	pink	0.190693
ENSG00000154451	GBP5	guanylate binding protein 5 [Source:HGNC Symbol	ENSG00000154451	pink	0.0678584
ENSG00000131979	GCH1	GTP cyclohydrolase 1 [Source:HGNC Symbol	ENSG00000131979	pink	0.00214612
ENSG00000105220	GPI	glucose-6-phosphate isomerase [Source:HGNC Symbol	ENSG00000105220	pink	0.00135439
ENSG00000120820	GLT8D2	glycosyltransferase 8 domain containing 2 [Source:HGNC Symbol	ENSG00000120820	tan	0.13816
ENSG00000140511	HAPLN3	hyaluronan and proteoglycan link protein 3 [Source:HGNC Symbol	ENSG00000140511	pink	0.275986
ENSG00000157551	KCNJ15	potassium inwardly rectifying channel subfamily J member 15 [Source:HGNC Symbol	ENSG00000157551	green	0.0678767
ENSG00000089177	KIF16B	kinesin family member 16B [Source:HGNC Symbol	ENSG00000089177	green	0.00532145
ENSG00000130164	LDLR	low density lipoprotein receptor [Source:HGNC Symbol	ENSG00000130164	green	0.618823
ENSG00000127311	HELB	DNA helicase B [Source:HGNC Symbol	ENSG00000127311	pink	0.0986115
ENSG00000138646	HERC5	HECT and RLD domain containing E3 ubiquitin protein ligase 5 [Source:HGNC Symbol	ENSG00000138646	pink	0.00599555
ENSG00000181350	LRRC75A	leucine rich repeat containing 75A [Source:HGNC Symbol	ENSG00000181350	green	0.0772067
ENSG00000163666	HESX1	HESX homeobox 1 [Source:HGNC Symbol	ENSG00000163666	pink	0.0443819
ENSG00000124222	STX16	syntaxin 16 [Source:HGNC Symbol	ENSG00000124222	tan	0.0809432
ENSG00000196684	HSH2D	hematopoietic SH2 domain containing [Source:HGNC Symbol	ENSG00000196684	pink	0.00278446
ENSG00000155858	LSM11	LSM11, U7 small nuclear RNA associated [Source:HGNC Symbol	ENSG00000155858	green	0.897793
ENSG00000125977	EIF2S2	eukaryotic translation initiation factor 2 subunit beta [Source:HGNC Symbol	ENSG00000125977	tan	0.387604
ENSG00000254087	LYN	LYN proto-oncogene, Src family tyrosine kinase [Source:HGNC Symbol	ENSG00000254087	green	0.0154399
ENSG00000214113	LYRM4	LYR motif containing 4 [Source:HGNC Symbol	ENSG00000214113	green	0.00917455
ENSG00000104814	MAP4K1	mitogen-activated protein kinase kinase kinase kinase 1 [Source:HGNC Symbol	ENSG00000104814	green	0.00453184
ENSG00000080824	HSP90AA1	heat shock protein 90 alpha family class A member 1 [Source:HGNC Symbol	ENSG00000080824	pink	0.124625
ENSG00000133398	MED10	mediator complex subunit 10 [Source:HGNC Symbol	ENSG00000133398	green	0.167385
ENSG00000166033	HTRA1	HtrA serine peptidase 1 [Source:HGNC Symbol	ENSG00000166033	pink	0.0152441
ENSG00000076662	ICAM3	intercellular adhesion molecule 3 [Source:HGNC Symbol	ENSG00000076662	pink	0.00919942
ENSG00000170430	MGMT	O-6-methylguanine-DNA methyltransferase [Source:HGNC Symbol	ENSG00000170430	green	0.129034
ENSG00000107745	MICU1	mitochondrial calcium uptake 1 [Source:HGNC Symbol	ENSG00000107745	green	0.000353807
ENSG00000130158	DOCK6	dedicator of cytokinesis 6 [Source:HGNC Symbol	ENSG00000130158	grey60	0.951963
ENSG00000197345	MRPL21	mitochondrial ribosomal protein L21 [Source:HGNC Symbol	ENSG00000197345	green	0.584982
ENSG00000163565	IFI16	interferon gamma inducible protein 16 [Source:HGNC Symbol	ENSG00000163565	pink	0.0686227
ENSG00000130560	UBAC1	UBA domain containing 1 [Source:HGNC Symbol	ENSG00000130560	tan	0.269211
ENSG00000130818	ZNF426	zinc finger protein 426 [Source:HGNC Symbol	ENSG00000130818	tan	0.0321128
ENSG00000278845	MRPL45	mitochondrial ribosomal protein L45 [Source:HGNC Symbol	ENSG00000278845	green	0.188963
ENSG00000131730	CKMT2	creatine kinase, mitochondrial 2 [Source:HGNC Symbol	ENSG00000131730	tan	0.0941864
ENSG00000131781	FMO5	flavin containing dimethylaniline monoxygenase 5 [Source:HGNC Symbol	ENSG00000131781	tan	0.197517
ENSG00000137965	IFI44	interferon induced protein 44 [Source:HGNC Symbol	ENSG00000137965	pink	0.0338171
ENSG00000132507	EIF5A	eukaryotic translation initiation factor 5A [Source:HGNC Symbol	ENSG00000132507	tan	0.0391686
ENSG00000137959	IFI44L	interferon induced protein 44 like [Source:HGNC Symbol	ENSG00000137959	pink	0.0319459
ENSG00000143436	MRPL9	mitochondrial ribosomal protein L9 [Source:HGNC Symbol	ENSG00000143436	green	0.748134
ENSG00000132718	SYT11	synaptotagmin 11 [Source:HGNC Symbol	ENSG00000132718	tan	0.00338349
ENSG00000115267	IFIH1	interferon induced with helicase C domain 1 [Source:HGNC Symbol	ENSG00000115267	pink	0.00014168
ENSG00000116898	MRPS15	mitochondrial ribosomal protein S15 [Source:HGNC Symbol	ENSG00000116898	green	0.607442
ENSG00000198899	MT-ATP6	mitochondrially encoded ATP synthase membrane subunit 6 [Source:HGNC Symbol	ENSG00000198899	green	0.0072005
ENSG00000110944	IL23A	interleukin 23 subunit alpha [Source:HGNC Symbol	ENSG00000110944	pink	0.0290487
ENSG00000134287	ARF3	ADP ribosylation factor 3 [Source:HGNC Symbol	ENSG00000134287	tan	0.624685
ENSG00000228253	MT-ATP8	mitochondrially encoded ATP synthase membrane subunit 8 [Source:HGNC Symbol	ENSG00000228253	green	0.19798
ENSG00000197272	IL27	interleukin 27 [Source:HGNC Symbol	ENSG00000197272	pink	0.0604116
ENSG00000164509	IL31RA	interleukin 31 receptor A [Source:HGNC Symbol	ENSG00000164509	pink	0.0213393
ENSG00000135930	EIF4E2	eukaryotic translation initiation factor 4E family member 2 [Source:HGNC Symbol	ENSG00000135930	tan	0.492857
ENSG00000198804	MT-CO1	mitochondrially encoded cytochrome c oxidase I [Source:HGNC Symbol	ENSG00000198804	green	0.0016312
ENSG00000198712	MT-CO2	mitochondrially encoded cytochrome c oxidase II [Source:HGNC Symbol	ENSG00000198712	green	0.057434
ENSG00000136854	STXBP1	syntaxin binding protein 1 [Source:HGNC Symbol	ENSG00000136854	tan	0.0210475
ENSG00000120210	INSL6	insulin like 6 [Source:HGNC Symbol	ENSG00000120210	pink	0.000273004
ENSG00000198938	MT-CO3	mitochondrially encoded cytochrome c oxidase III [Source:HGNC Symbol	ENSG00000198938	green	0.0139462
ENSG00000198727	MT-CYB	mitochondrially encoded cytochrome b [Source:HGNC Symbol	ENSG00000198727	green	0.000215637
ENSG00000096968	JAK2	Janus kinase 2 [Source:HGNC Symbol	ENSG00000096968	pink	0.000200036
ENSG00000213859	KCTD11	potassium channel tetramerization domain containing 11 [Source:HGNC Symbol	ENSG00000213859	pink	0.0103832
ENSG00000165185	KIAA1958	KIAA1958 [Source:HGNC Symbol	ENSG00000165185	pink	0.00130733
ENSG00000137509	PRCP	prolylcarboxypeptidase [Source:HGNC Symbol	ENSG00000137509	grey60	0.203393
ENSG00000108244	KRT23	keratin 23 [Source:HGNC Symbol	ENSG00000108244	pink	0.308816
ENSG00000198888	MT-ND1	mitochondrially encoded NADH:ubiquinone oxidoreductase core subunit 1 [Source:HGNC Symbol	ENSG00000198888	green	5.37e-05
ENSG00000002549	LAP3	leucine aminopeptidase 3 [Source:HGNC Symbol	ENSG00000002549	pink	0.0268657
ENSG00000087253	LPCAT2	lysophosphatidylcholine acyltransferase 2 [Source:HGNC Symbol	ENSG00000087253	pink	0.0188215
ENSG00000133739	LRRCC1	leucine rich repeat and coiled-coil centrosomal protein 1 [Source:HGNC Symbol	ENSG00000133739	pink	5.95e-05
ENSG00000168056	LTBP3	latent transforming growth factor beta binding protein 3 [Source:HGNC Symbol	ENSG00000168056	pink	0.00673131
ENSG00000198763	MT-ND2	mitochondrially encoded NADH:ubiquinone oxidoreductase core subunit 2 [Source:HGNC Symbol	ENSG00000198763	green	0.000458552
ENSG00000277443	MARCKS	myristoylated alanine rich protein kinase C substrate [Source:HGNC Symbol	ENSG00000277443	pink	0.000396258
ENSG00000120539	MASTL	microtubule associated serine/threonine kinase like [Source:HGNC Symbol	ENSG00000120539	pink	0.000433491
ENSG00000141854	MISP3	MISP family member 3 [Source:HGNC Symbol	ENSG00000141854	pink	0.182092
ENSG00000114978	MOB1A	MOB kinase activator 1A [Source:HGNC Symbol	ENSG00000114978	pink	0.0019681
ENSG00000139514	SLC7A1	solute carrier family 7 member 1 [Source:HGNC Symbol	ENSG00000139514	grey60	0.000523601
ENSG00000065911	MTHFD2	methylenetetrahydrofolate dehydrogenase (NADP+ dependent) 2, methenyltetrahydrofolate cyclohydrolase [Source:HGNC Symbol	ENSG00000065911	pink	0.00299635
ENSG00000140025	EFCAB11	EF-hand calcium binding domain 11 [Source:HGNC Symbol	ENSG00000140025	tan	0.749221
ENSG00000102921	N4BP1	NEDD4 binding protein 1 [Source:HGNC Symbol	ENSG00000102921	pink	0.00789514
ENSG00000198886	MT-ND4	mitochondrially encoded NADH:ubiquinone oxidoreductase core subunit 4 [Source:HGNC Symbol	ENSG00000198886	green	0.00129487
ENSG00000111912	NCOA7	nuclear receptor coactivator 7 [Source:HGNC Symbol	ENSG00000111912	pink	6.87e-05
ENSG00000212907	MT-ND4L	mitochondrially encoded NADH:ubiquinone oxidoreductase core subunit 4L [Source:HGNC Symbol	ENSG00000212907	green	0.0526344
ENSG00000198786	MT-ND5	mitochondrially encoded NADH:ubiquinone oxidoreductase core subunit 5 [Source:HGNC Symbol	ENSG00000198786	green	2.24e-05
ENSG00000198695	MT-ND6	mitochondrially encoded NADH:ubiquinone oxidoreductase core subunit 6 [Source:HGNC Symbol	ENSG00000198695	green	7.59e-05
ENSG00000141497	ZMYND15	zinc finger MYND-type containing 15 [Source:HGNC Symbol	ENSG00000141497	tan	0.0255902
ENSG00000135540	NHSL1	NHS like 1 [Source:HGNC Symbol	ENSG00000135540	pink	0.0117897
ENSG00000123609	NMI	N-myc and STAT interactor [Source:HGNC Symbol	ENSG00000123609	pink	0.0120472
ENSG00000141741	MIEN1	migration and invasion enhancer 1 [Source:HGNC Symbol	ENSG00000141741	tan	0.315408
ENSG00000251357	None	novel protein	ENSG00000251357	pink	0.311231
ENSG00000196531	NACA	nascent polypeptide associated complex subunit alpha [Source:HGNC Symbol	ENSG00000196531	green	0.0880813
ENSG00000122643	NT5C3A	5'-nucleotidase, cytosolic IIIA [Source:HGNC Symbol	ENSG00000122643	pink	2.55e-05
ENSG00000008130	NADK	NAD kinase [Source:HGNC Symbol	ENSG00000008130	green	0.0525085
ENSG00000249437	NAIP	NLR family apoptosis inhibitory protein [Source:HGNC Symbol	ENSG00000249437	green	0.00450937
ENSG00000021762	OSBPL5	oxysterol binding protein like 5 [Source:HGNC Symbol	ENSG00000021762	pink	0.000810263
ENSG00000004779	NDUFAB1	NADH:ubiquinone oxidoreductase subunit AB1 [Source:HGNC Symbol	ENSG00000004779	green	0.364878
ENSG00000077150	NFKB2	nuclear factor kappa B subunit 2 [Source:HGNC Symbol	ENSG00000077150	green	0.0309574
ENSG00000178467	P4HTM	prolyl 4-hydroxylase, transmembrane [Source:HGNC Symbol	ENSG00000178467	pink	0.551376
ENSG00000143147	GPR161	G protein-coupled receptor 161 [Source:HGNC Symbol	ENSG00000143147	grey60	0.831811
ENSG00000111224	PARP11	poly(ADP-ribose) polymerase family member 11 [Source:HGNC Symbol	ENSG00000111224	pink	0.000902645
ENSG00000104825	NFKBIB	NFKB inhibitor beta [Source:HGNC Symbol	ENSG00000104825	green	0.0164646
ENSG00000059378	PARP12	poly(ADP-ribose) polymerase family member 12 [Source:HGNC Symbol	ENSG00000059378	pink	0.000363042
ENSG00000073536	NLE1	notchless homolog 1 [Source:HGNC Symbol	ENSG00000073536	green	0.568118
ENSG00000140853	NLRC5	NLR family CARD domain containing 5 [Source:HGNC Symbol	ENSG00000140853	green	0.0295286
ENSG00000144426	NBEAL1	neurobeachin like 1 [Source:HGNC Symbol	ENSG00000144426	tan	0.0164544
ENSG00000173193	PARP14	poly(ADP-ribose) polymerase family member 14 [Source:HGNC Symbol	ENSG00000173193	pink	0.000240734
ENSG00000258472	None	novel protein	ENSG00000258472	green	0.368111
ENSG00000269242	None	novel transcript	ENSG00000269242	green	0.166569
ENSG00000284526	None	novel protein	ENSG00000284526	green	0.158197
ENSG00000146063	TRIM41	tripartite motif containing 41 [Source:HGNC Symbol	ENSG00000146063	tan	0.419445
ENSG00000107833	NPM3	nucleophosmin/nucleoplasmin 3 [Source:HGNC Symbol	ENSG00000107833	green	0.0523675
ENSG00000164346	NSA2	NSA2 ribosome biogenesis factor [Source:HGNC Symbol	ENSG00000164346	green	0.224691
ENSG00000089041	P2RX7	purinergic receptor P2X 7 [Source:HGNC Symbol	ENSG00000089041	green	0.245138
ENSG00000138496	PARP9	poly(ADP-ribose) polymerase family member 9 [Source:HGNC Symbol	ENSG00000138496	pink	0.0228541
ENSG00000170515	PA2G4	proliferation-associated 2G4 [Source:HGNC Symbol	ENSG00000170515	green	0.0105894
ENSG00000151131	NOPCHAP1	NOP protein chaperone 1 [Source:HGNC Symbol	ENSG00000151131	tan	0.0867114
ENSG00000173599	PC	pyruvate carboxylase [Source:HGNC Symbol	ENSG00000173599	pink	0.20052
ENSG00000197646	PDCD1LG2	programmed cell death 1 ligand 2 [Source:HGNC Symbol	ENSG00000197646	pink	0.0515706
ENSG00000188677	PARVB	parvin beta [Source:HGNC Symbol	ENSG00000188677	green	0.0936504
ENSG00000197111	PCBP2	poly(rC) binding protein 2 [Source:HGNC Symbol	ENSG00000197111	green	0.191899
ENSG00000160209	PDXK	pyridoxal kinase [Source:HGNC Symbol	ENSG00000160209	pink	0.0107664
ENSG00000197121	PGAP1	post-GPI attachment to proteins inositol deacylase 1 [Source:HGNC Symbol	ENSG00000197121	pink	0.000989387
ENSG00000197724	PHF2	PHD finger protein 2 [Source:HGNC Symbol	ENSG00000197724	pink	0.0507941
ENSG00000089220	PEBP1	phosphatidylethanolamine binding protein 1 [Source:HGNC Symbol	ENSG00000089220	green	0.0116028
ENSG00000123349	PFDN5	prefoldin subunit 5 [Source:HGNC Symbol	ENSG00000123349	green	0.0201483
ENSG00000154217	PITPNC1	phosphatidylinositol transfer protein cytoplasmic 1 [Source:HGNC Symbol	ENSG00000154217	pink	0.456511
ENSG00000112511	PHF1	PHD finger protein 1 [Source:HGNC Symbol	ENSG00000112511	green	0.70583
ENSG00000102007	PLP2	proteolipid protein 2 [Source:HGNC Symbol	ENSG00000102007	pink	0.00949657
ENSG00000107537	PHYH	phytanoyl-CoA 2-hydroxylase [Source:HGNC Symbol	ENSG00000107537	green	0.00664415
ENSG00000138035	PNPT1	polyribonucleotide nucleotidyltransferase 1 [Source:HGNC Symbol	ENSG00000138035	pink	0.0111281
ENSG00000163644	PPM1K	protein phosphatase, Mg2+/Mn2+ dependent 1K [Source:HGNC Symbol	ENSG00000163644	pink	0.00196141
ENSG00000057294	PKP2	plakophilin 2 [Source:HGNC Symbol	ENSG00000057294	green	0.589439
ENSG00000156050	FAM161B	FAM161 centrosomal protein B [Source:HGNC Symbol	ENSG00000156050	tan	0.254857
ENSG00000161714	PLCD3	phospholipase C delta 3 [Source:HGNC Symbol	ENSG00000161714	green	0.0716164
ENSG00000166428	PLD4	phospholipase D family member 4 [Source:HGNC Symbol	ENSG00000166428	green	0.377988
ENSG00000101868	POLA1	DNA polymerase alpha 1, catalytic subunit [Source:HGNC Symbol	ENSG00000101868	green	0.444641
ENSG00000156500	PABIR3	PABIR family member 3 [Source:HGNC Symbol	ENSG00000156500	grey60	0.000124838
ENSG00000156603	MED19	mediator complex subunit 19 [Source:HGNC Symbol	ENSG00000156603	tan	0.0391073
ENSG00000137054	POLR1E	RNA polymerase I subunit E [Source:HGNC Symbol	ENSG00000137054	green	0.115398
ENSG00000154845	PPP4R1	protein phosphatase 4 regulatory subunit 1 [Source:HGNC Symbol	ENSG00000154845	pink	0.790326
ENSG00000102312	PORCN	porcupine O-acyltransferase [Source:HGNC Symbol	ENSG00000102312	green	0.0276885
ENSG00000173457	PPP1R14B	protein phosphatase 1 regulatory inhibitor subunit 14B [Source:HGNC Symbol	ENSG00000173457	green	0.00104645
ENSG00000157680	DGKI	diacylglycerol kinase iota [Source:HGNC Symbol	ENSG00000157680	tan	0.0222629
ENSG00000041357	PSMA4	proteasome 20S subunit alpha 4 [Source:HGNC Symbol	ENSG00000041357	pink	0.00557942
ENSG00000157856	DRC1	dynein regulatory complex subunit 1 [Source:HGNC Symbol	ENSG00000157856	grey60	0.187262
ENSG00000091127	PUS7	pseudouridine synthase 7 [Source:HGNC Symbol	ENSG00000091127	green	0.358787
ENSG00000011478	QPCTL	glutaminyl-peptide cyclotransferase like [Source:HGNC Symbol	ENSG00000011478	pink	0.355754
ENSG00000172053	QARS1	glutaminyl-tRNA synthetase 1 [Source:HGNC Symbol	ENSG00000172053	green	0.0568859
ENSG00000158710	TAGLN2	transgelin 2 [Source:HGNC Symbol	ENSG00000158710	tan	0.005696
ENSG00000179331	RAB39A	RAB39A, member RAS oncogene family [Source:HGNC Symbol	ENSG00000179331	pink	0.000765863
ENSG00000168118	RAB4A	RAB4A, member RAS oncogene family [Source:HGNC Symbol	ENSG00000168118	green	0.834918
ENSG00000159713	TPPP3	tubulin polymerization promoting protein family member 3 [Source:HGNC Symbol	ENSG00000159713	tan	0.232594
ENSG00000159784	FAM131B	family with sequence similarity 131 member B [Source:HGNC Symbol	ENSG00000159784	tan	0.00320139
ENSG00000141542	RAB40B	RAB40B, member RAS oncogene family [Source:HGNC Symbol	ENSG00000141542	pink	0.0523241
ENSG00000152061	RABGAP1L	RAB GTPase activating protein 1 like [Source:HGNC Symbol	ENSG00000152061	pink	9.32e-07
ENSG00000204628	RACK1	receptor for activated C kinase 1 [Source:HGNC Symbol	ENSG00000204628	green	0.0140099
ENSG00000152689	RASGRP3	RAS guanyl releasing protein 3 [Source:HGNC Symbol	ENSG00000152689	pink	0.584457
ENSG00000160818	GPATCH4	G-patch domain containing 4 (gene/pseudogene) [Source:HGNC Symbol	ENSG00000160818	tan	0.033534
ENSG00000102317	RBM3	RNA binding motif protein 3 [Source:HGNC Symbol	ENSG00000102317	green	0.0709112
ENSG00000180198	RCC1	regulator of chromosome condensation 1 [Source:HGNC Symbol	ENSG00000180198	green	0.0310908
ENSG00000104856	RELB	RELB proto-oncogene, NF-kB subunit [Source:HGNC Symbol	ENSG00000104856	green	0.00689056
ENSG00000129667	RHBDF2	rhomboid 5 homolog 2 [Source:HGNC Symbol	ENSG00000129667	green	0.187293
ENSG00000101773	RBBP8	RB binding protein 8, endonuclease [Source:HGNC Symbol	ENSG00000101773	pink	0.000100513
ENSG00000117602	RCAN3	RCAN family member 3 [Source:HGNC Symbol	ENSG00000117602	pink	0.315267
ENSG00000163170	BOLA3	bolA family member 3 [Source:HGNC Symbol	ENSG00000163170	tan	0.104384
ENSG00000142599	RERE	arginine-glutamic acid dipeptide repeats [Source:HGNC Symbol	ENSG00000142599	pink	0.000771488
ENSG00000143344	RGL1	ral guanine nucleotide dissociation stimulator like 1 [Source:HGNC Symbol	ENSG00000143344	pink	0.0418323
ENSG00000166532	RIMKLB	ribosomal modification protein rimK like family member B [Source:HGNC Symbol	ENSG00000166532	pink	0.533892
ENSG00000175643	RMI2	RecQ mediated genome instability 2 [Source:HGNC Symbol	ENSG00000175643	pink	0.665559
ENSG00000151692	RNF144A	ring finger protein 144A [Source:HGNC Symbol	ENSG00000151692	pink	0.00130049
ENSG00000164050	PLXNB1	plexin B1 [Source:HGNC Symbol	ENSG00000164050	tan	0.23739
ENSG00000164296	TIGD6	tigger transposable element derived 6 [Source:HGNC Symbol	ENSG00000164296	tan	0.0320046
ENSG00000042062	RIPOR3	RIPOR family member 3 [Source:HGNC Symbol	ENSG00000042062	green	0.0115261
ENSG00000173821	RNF213	ring finger protein 213 [Source:HGNC Symbol	ENSG00000173821	pink	0.00719109
ENSG00000165097	KDM1B	lysine demethylase 1B [Source:HGNC Symbol	ENSG00000165097	grey60	0.00117743
ENSG00000165164	CFAP47	cilia and flagella associated protein 47 [Source:HGNC Symbol	ENSG00000165164	tan	0.0134477
ENSG00000020577	SAMD4A	sterile alpha motif domain containing 4A [Source:HGNC Symbol	ENSG00000020577	pink	0.00714478
ENSG00000165724	ZMYND19	zinc finger MYND-type containing 19 [Source:HGNC Symbol	ENSG00000165724	tan	0.423483
ENSG00000205413	SAMD9	sterile alpha motif domain containing 9 [Source:HGNC Symbol	ENSG00000205413	pink	0.053304
ENSG00000177409	SAMD9L	sterile alpha motif domain containing 9 like [Source:HGNC Symbol	ENSG00000177409	pink	0.00629842
ENSG00000147403	RPL10	ribosomal protein L10 [Source:HGNC Symbol	ENSG00000147403	green	0.0402422
ENSG00000198755	RPL10A	ribosomal protein L10a [Source:HGNC Symbol	ENSG00000198755	green	0.0277391
ENSG00000142676	RPL11	ribosomal protein L11 [Source:HGNC Symbol	ENSG00000142676	green	0.0110605
ENSG00000101347	SAMHD1	SAM and HD domain containing deoxynucleoside triphosphate triphosphohydrolase 1 [Source:HGNC Symbol	ENSG00000101347	pink	1.13e-05
ENSG00000047634	SCML1	Scm polycomb group protein like 1 [Source:HGNC Symbol	ENSG00000047634	pink	8.5e-06
ENSG00000167637	ZNF283	zinc finger protein 283 [Source:HGNC Symbol	ENSG00000167637	tan	0.741485
ENSG00000284194	SCO2	synthesis of cytochrome C oxidase 2 [Source:HGNC Symbol	ENSG00000284194	pink	0.00451459
ENSG00000197958	RPL12	ribosomal protein L12 [Source:HGNC Symbol	ENSG00000197958	green	0.503067
ENSG00000168237	GLYCTK	glycerate kinase [Source:HGNC Symbol	ENSG00000168237	tan	0.0156469
ENSG00000168803	ADAL	adenosine deaminase like [Source:HGNC Symbol	ENSG00000168803	tan	0.0252504
ENSG00000138623	SEMA7A	semaphorin 7A (John Milton Hagen blood group) [Source:HGNC Symbol	ENSG00000138623	pink	0.80577
ENSG00000142541	RPL13A	ribosomal protein L13a [Source:HGNC Symbol	ENSG00000142541	green	0.0982374
ENSG00000169442	CD52	CD52 molecule [Source:HGNC Symbol	ENSG00000169442	grey60	0.0500398
ENSG00000169570	DTWD2	DTW domain containing 2 [Source:HGNC Symbol	ENSG00000169570	tan	0.160029
ENSG00000188846	RPL14	ribosomal protein L14 [Source:HGNC Symbol	ENSG00000188846	green	0.142046
ENSG00000108298	RPL19	ribosomal protein L19 [Source:HGNC Symbol	ENSG00000108298	green	0.019498
ENSG00000125691	RPL23	ribosomal protein L23 [Source:HGNC Symbol	ENSG00000125691	green	0.0914363
ENSG00000160190	SLC37A1	solute carrier family 37 member 1 [Source:HGNC Symbol	ENSG00000160190	pink	0.00168005
ENSG00000166750	SLFN5	schlafen family member 5 [Source:HGNC Symbol	ENSG00000166750	pink	0.169942
ENSG00000101596	SMCHD1	structural maintenance of chromosomes flexible hinge domain containing 1 [Source:HGNC Symbol	ENSG00000101596	pink	1.98e-05
ENSG00000114391	RPL24	ribosomal protein L24 [Source:HGNC Symbol	ENSG00000114391	green	0.145211
ENSG00000131469	RPL27	ribosomal protein L27 [Source:HGNC Symbol	ENSG00000131469	green	0.230853
ENSG00000166441	RPL27A	ribosomal protein L27a [Source:HGNC Symbol	ENSG00000166441	green	0.223264
ENSG00000214872	SMTNL1	smoothelin like 1 [Source:HGNC Symbol	ENSG00000214872	pink	0.000898278
ENSG00000162244	RPL29	ribosomal protein L29 [Source:HGNC Symbol	ENSG00000162244	green	0.253202
ENSG00000172301	COPRS	coordinator of PRMT5 and differentiation stimulator [Source:HGNC Symbol	ENSG00000172301	tan	0.522739
ENSG00000135899	SP110	SP110 nuclear body protein [Source:HGNC Symbol	ENSG00000135899	pink	0.0457665
ENSG00000172732	MUS81	MUS81 structure-specific endonuclease subunit [Source:HGNC Symbol	ENSG00000172732	tan	0.0458724
ENSG00000172757	CFL1	cofilin 1 [Source:HGNC Symbol	ENSG00000172757	tan	0.0131287
ENSG00000100316	RPL3	ribosomal protein L3 [Source:HGNC Symbol	ENSG00000100316	green	0.0365386
ENSG00000172986	GXYLT2	glucoside xylosyltransferase 2 [Source:HGNC Symbol	ENSG00000172986	tan	0.641005
ENSG00000079263	SP140	SP140 nuclear body protein [Source:HGNC Symbol	ENSG00000079263	pink	0.00231366
ENSG00000156482	RPL30	ribosomal protein L30 [Source:HGNC Symbol	ENSG00000156482	green	0.00781976
ENSG00000100596	SPTLC2	serine palmitoyltransferase long chain base subunit 2 [Source:HGNC Symbol	ENSG00000100596	pink	0.00407779
ENSG00000071082	RPL31	ribosomal protein L31 [Source:HGNC Symbol	ENSG00000071082	green	0.167933
ENSG00000138385	SSB	small RNA binding exonuclease protection factor La [Source:HGNC Symbol	ENSG00000138385	pink	0.00103552
ENSG00000109475	RPL34	ribosomal protein L34 [Source:HGNC Symbol	ENSG00000109475	green	0.132861
ENSG00000145592	RPL37	ribosomal protein L37 [Source:HGNC Symbol	ENSG00000145592	green	0.038003
ENSG00000174516	PELI3	pellino E3 ubiquitin protein ligase family member 3 [Source:HGNC Symbol	ENSG00000174516	tan	0.0418352
ENSG00000157216	SSBP3	single stranded DNA binding protein 3 [Source:HGNC Symbol	ENSG00000157216	pink	0.409171
ENSG00000138134	STAMBPL1	STAM binding protein like 1 [Source:HGNC Symbol	ENSG00000138134	pink	0.0221192
ENSG00000175294	CATSPER1	cation channel sperm associated 1 [Source:HGNC Symbol	ENSG00000175294	tan	0.000154087
ENSG00000197756	RPL37A	ribosomal protein L37a [Source:HGNC Symbol	ENSG00000197756	green	0.0116759
ENSG00000115415	STAT1	signal transducer and activator of transcription 1 [Source:HGNC Symbol	ENSG00000115415	pink	0.0305421
ENSG00000177182	CLVS1	clavesin 1 [Source:HGNC Symbol	ENSG00000177182	tan	0.0720838
ENSG00000170581	STAT2	signal transducer and activator of transcription 2 [Source:HGNC Symbol	ENSG00000170581	pink	0.0120679
ENSG00000177807	KCNJ10	potassium inwardly rectifying channel subfamily J member 10 [Source:HGNC Symbol	ENSG00000177807	grey60	0.227935
ENSG00000172809	RPL38	ribosomal protein L38 [Source:HGNC Symbol	ENSG00000172809	green	0.00892228
ENSG00000174444	RPL4	ribosomal protein L4 [Source:HGNC Symbol	ENSG00000174444	green	0.0702336
ENSG00000115107	STEAP3	STEAP3 metalloreductase [Source:HGNC Symbol	ENSG00000115107	pink	0.949338
ENSG00000100321	SYNGR1	synaptogyrin 1 [Source:HGNC Symbol	ENSG00000100321	pink	0.0494732
ENSG00000178538	CA8	carbonic anhydrase 8 [Source:HGNC Symbol	ENSG00000178538	grey60	0.0921366
ENSG00000089009	RPL6	ribosomal protein L6 [Source:HGNC Symbol	ENSG00000089009	green	0.271464
ENSG00000178764	ZHX2	zinc fingers and homeoboxes 2 [Source:HGNC Symbol	ENSG00000178764	tan	0.442067
ENSG00000179222	MAGED1	MAGE family member D1 [Source:HGNC Symbol	ENSG00000179222	tan	0.0175042
ENSG00000170921	TANC2	tetratricopeptide repeat, ankyrin repeat and coiled-coil containing 2 [Source:HGNC Symbol	ENSG00000170921	pink	0.0889218
ENSG00000148303	RPL7A	ribosomal protein L7a [Source:HGNC Symbol	ENSG00000148303	green	0.0378316
ENSG00000089157	RPLP0	ribosomal protein lateral stalk subunit P0 [Source:HGNC Symbol	ENSG00000089157	green	0.0608722
ENSG00000181192	DHTKD1	dehydrogenase E1 and transketolase domain containing 1 [Source:HGNC Symbol	ENSG00000181192	grey60	0.066885
ENSG00000142534	RPS11	ribosomal protein S11 [Source:HGNC Symbol	ENSG00000142534	green	0.0145311
ENSG00000112306	RPS12	ribosomal protein S12 [Source:HGNC Symbol	ENSG00000112306	green	0.182679
ENSG00000110700	RPS13	ribosomal protein S13 [Source:HGNC Symbol	ENSG00000110700	green	0.381359
ENSG00000134419	RPS15A	ribosomal protein S15a [Source:HGNC Symbol	ENSG00000134419	green	0.27404
ENSG00000182601	HS3ST4	heparan sulfate-glucosamine 3-sulfotransferase 4 [Source:HGNC Symbol	ENSG00000182601	tan	0.214433
ENSG00000231500	RPS18	ribosomal protein S18 [Source:HGNC Symbol	ENSG00000231500	green	0.0359421
ENSG00000183309	ZNF623	zinc finger protein 623 [Source:HGNC Symbol	ENSG00000183309	tan	0.280962
ENSG00000231925	TAPBP	TAP binding protein [Source:HGNC Symbol	ENSG00000231925	pink	0.0195957
ENSG00000184220	CMSS1	cms1 ribosomal small subunit homolog [Source:HGNC Symbol	ENSG00000184220	tan	0.760439
ENSG00000184271	POU6F1	POU class 6 homeobox 1 [Source:HGNC Symbol	ENSG00000184271	grey60	0.143218
ENSG00000184574	LPAR5	lysophosphatidic acid receptor 5 [Source:HGNC Symbol	ENSG00000184574	grey60	0.966911
ENSG00000198933	TBKBP1	TBK1 binding protein 1 [Source:HGNC Symbol	ENSG00000198933	pink	0.054295
ENSG00000196628	TCF4	transcription factor 4 [Source:HGNC Symbol	ENSG00000196628	pink	0.000156941
ENSG00000185808	PIGP	phosphatidylinositol glycan anchor biosynthesis class P [Source:HGNC Symbol	ENSG00000185808	tan	0.431113
ENSG00000185838	GNB1L	G protein subunit beta 1 like [Source:HGNC Symbol	ENSG00000185838	tan	0.196479
ENSG00000196116	TDRD7	tudor domain containing 7 [Source:HGNC Symbol	ENSG00000196116	pink	3.4e-05
ENSG00000186106	ANKRD46	ankyrin repeat domain 46 [Source:HGNC Symbol	ENSG00000186106	tan	0.512841
ENSG00000008988	RPS20	ribosomal protein S20 [Source:HGNC Symbol	ENSG00000008988	green	0.441972
ENSG00000171858	RPS21	ribosomal protein S21 [Source:HGNC Symbol	ENSG00000171858	green	0.0407011
ENSG00000186468	RPS23	ribosomal protein S23 [Source:HGNC Symbol	ENSG00000186468	green	0.609308
ENSG00000188070	ZFTA	zinc finger translocation associated [Source:HGNC Symbol	ENSG00000188070	tan	0.770872
ENSG00000138326	RPS24	ribosomal protein S24 [Source:HGNC Symbol	ENSG00000138326	green	0.0469972
ENSG00000118181	RPS25	ribosomal protein S25 [Source:HGNC Symbol	ENSG00000118181	green	0.671662
ENSG00000177954	RPS27	ribosomal protein S27 [Source:HGNC Symbol	ENSG00000177954	green	0.0848934
ENSG00000213741	RPS29	ribosomal protein S29 [Source:HGNC Symbol	ENSG00000213741	green	0.364225
ENSG00000112773	TENT5A	terminal nucleotidyltransferase 5A [Source:HGNC Symbol	ENSG00000112773	pink	1.96e-05
ENSG00000149273	RPS3	ribosomal protein S3 [Source:HGNC Symbol	ENSG00000149273	green	0.00687587
ENSG00000088992	TESC	tescalcin [Source:HGNC Symbol	ENSG00000088992	pink	0.0476786
ENSG00000083845	RPS5	ribosomal protein S5 [Source:HGNC Symbol	ENSG00000083845	green	0.00355321
ENSG00000137154	RPS6	ribosomal protein S6 [Source:HGNC Symbol	ENSG00000137154	green	0.0584683
ENSG00000171863	RPS7	ribosomal protein S7 [Source:HGNC Symbol	ENSG00000171863	green	0.378229
ENSG00000152558	TMEM123	transmembrane protein 123 [Source:HGNC Symbol	ENSG00000152558	pink	0.00529434
ENSG00000196670	ZFP62	ZFP62 zinc finger protein [Source:HGNC Symbol	ENSG00000196670	tan	0.0408369
ENSG00000198792	TMEM184B	transmembrane protein 184B [Source:HGNC Symbol	ENSG00000198792	pink	0.00570061
ENSG00000142937	RPS8	ribosomal protein S8 [Source:HGNC Symbol	ENSG00000142937	green	0.0654088
ENSG00000102524	TNFSF13B	TNF superfamily member 13b [Source:HGNC Symbol	ENSG00000102524	pink	0.0102241
ENSG00000175274	TP53I11	tumor protein p53 inducible protein 11 [Source:HGNC Symbol	ENSG00000175274	pink	0.000553761
ENSG00000141858	SAMD1	sterile alpha motif domain containing 1 [Source:HGNC Symbol	ENSG00000141858	green	0.00481664
ENSG00000197568	HHLA3	HERV-H LTR-associating 3 [Source:HGNC Symbol	ENSG00000197568	grey60	0.596449
ENSG00000137364	TPMT	thiopurine S-methyltransferase [Source:HGNC Symbol	ENSG00000137364	pink	0.00519524
ENSG00000121060	TRIM25	tripartite motif containing 25 [Source:HGNC Symbol	ENSG00000121060	pink	0.0204503
ENSG00000214279	SCART1	scavenger receptor family member expressed on T cells 1 [Source:HGNC Symbol	ENSG00000214279	green	0.0150403
ENSG00000140612	SEC11A	SEC11 homolog A, signal peptidase complex subunit [Source:HGNC Symbol	ENSG00000140612	green	0.480685
ENSG00000100095	SEZ6L	seizure related 6 homolog like [Source:HGNC Symbol	ENSG00000100095	green	0.463254
ENSG00000165886	UBTD1	ubiquitin domain containing 1 [Source:HGNC Symbol	ENSG00000165886	pink	0.0252457
ENSG00000160691	SHC1	SHC adaptor protein 1 [Source:HGNC Symbol	ENSG00000160691	green	0.804834
ENSG00000102743	SLC25A15	solute carrier family 25 member 15 [Source:HGNC Symbol	ENSG00000102743	green	0.0117065
ENSG00000198225	FKBP1C	FKBP prolyl isomerase family member 1C [Source:HGNC Symbol	ENSG00000198225	tan	0.724946
ENSG00000005022	SLC25A5	solute carrier family 25 member 5 [Source:HGNC Symbol	ENSG00000005022	green	0.169685
ENSG00000198467	TPM2	tropomyosin 2 [Source:HGNC Symbol	ENSG00000198467	tan	0.0914914
ENSG00000028116	VRK2	VRK serine/threonine kinase 2 [Source:HGNC Symbol	ENSG00000028116	pink	0.00110039
ENSG00000198538	ZNF28	zinc finger protein 28 [Source:HGNC Symbol	ENSG00000198538	tan	0.624068
ENSG00000182557	SPNS3	sphingolipid transporter 3 (putative) [Source:HGNC Symbol	ENSG00000182557	green	0.0961962
ENSG00000137877	SPTBN5	spectrin beta, non-erythrocytic 5 [Source:HGNC Symbol	ENSG00000137877	green	0.249286
ENSG00000198911	SREBF2	sterol regulatory element binding transcription factor 2 [Source:HGNC Symbol	ENSG00000198911	green	0.788801
ENSG00000263465	SRSF8	serine and arginine rich splicing factor 8 [Source:HGNC Symbol	ENSG00000263465	green	0.312972
ENSG00000196562	SULF2	sulfatase 2 [Source:HGNC Symbol	ENSG00000196562	green	0.00086487
ENSG00000180964	TCEAL8	transcription elongation factor A like 8 [Source:HGNC Symbol	ENSG00000180964	green	0.198753
ENSG00000129566	TEP1	telomerase associated protein 1 [Source:HGNC Symbol	ENSG00000129566	green	0.00149438
ENSG00000140105	WARS1	tryptophanyl-tRNA synthetase 1 [Source:HGNC Symbol	ENSG00000140105	pink	0.319919
ENSG00000136478	TEX2	testis expressed 2 [Source:HGNC Symbol	ENSG00000136478	green	0.0520209
ENSG00000198829	SUCNR1	succinate receptor 1 [Source:HGNC Symbol	ENSG00000198829	grey60	0.03094
ENSG00000198176	TFDP1	transcription factor Dp-1 [Source:HGNC Symbol	ENSG00000198176	green	0.0649111
ENSG00000159445	THEM4	thioesterase superfamily member 4 [Source:HGNC Symbol	ENSG00000159445	green	0.847045
ENSG00000154310	TNIK	TRAF2 and NCK interacting kinase [Source:HGNC Symbol	ENSG00000154310	green	0.0732421
ENSG00000188001	TPRG1	tumor protein p63 regulated 1 [Source:HGNC Symbol	ENSG00000188001	green	0.00997503
ENSG00000132530	XAF1	XIAP associated factor 1 [Source:HGNC Symbol	ENSG00000132530	pink	0.0176372
ENSG00000133112	TPT1	tumor protein, translationally-controlled 1 [Source:HGNC Symbol	ENSG00000133112	green	0.0500381
ENSG00000203326	ZNF525	zinc finger protein 525 [Source:HGNC Symbol	ENSG00000203326	tan	0.955799
ENSG00000203907	OOEP	oocyte expressed protein [Source:HGNC Symbol	ENSG00000203907	tan	0.00093044
ENSG00000109654	TRIM2	tripartite motif containing 2 [Source:HGNC Symbol	ENSG00000109654	green	0.188276
ENSG00000204991	SPIRE2	spire type actin nucleation factor 2 [Source:HGNC Symbol	ENSG00000204991	grey60	0.150236
ENSG00000114127	XRN1	5'-3' exoribonuclease 1 [Source:HGNC Symbol	ENSG00000114127	pink	0.000713103
ENSG00000146054	TRIM7	tripartite motif containing 7 [Source:HGNC Symbol	ENSG00000146054	green	0.411888
ENSG00000087077	TRIP6	thyroid hormone receptor interactor 6 [Source:HGNC Symbol	ENSG00000087077	green	0.00510852
ENSG00000124256	ZBP1	Z-DNA binding protein 1 [Source:HGNC Symbol	ENSG00000124256	pink	0.0541707
ENSG00000196230	TUBB	tubulin beta class I [Source:HGNC Symbol	ENSG00000196230	green	0.0411742
ENSG00000143179	UCK2	uridine-cytidine kinase 2 [Source:HGNC Symbol	ENSG00000143179	green	0.103294
ENSG00000198722	UNC13B	unc-13 homolog B [Source:HGNC Symbol	ENSG00000198722	green	0.00932281
ENSG00000156687	UNC5D	unc-5 netrin receptor D [Source:HGNC Symbol	ENSG00000156687	green	0.0555336
ENSG00000178199	ZC3H12D	zinc finger CCCH-type containing 12D [Source:HGNC Symbol	ENSG00000178199	pink	0.00556106
ENSG00000214941	ZSWIM7	zinc finger SWIM-type containing 7 [Source:HGNC Symbol	ENSG00000214941	tan	0.0834557
ENSG00000105939	ZC3HAV1	zinc finger CCCH-type containing, antiviral 1 [Source:HGNC Symbol	ENSG00000105939	pink	0.00864285
ENSG00000156467	UQCRB	ubiquinol-cytochrome c reductase binding protein [Source:HGNC Symbol	ENSG00000156467	green	0.542831
ENSG00000173660	UQCRH	ubiquinol-cytochrome c reductase hinge protein [Source:HGNC Symbol	ENSG00000173660	green	0.450299
ENSG00000141664	ZCCHC2	zinc finger CCHC-type containing 2 [Source:HGNC Symbol	ENSG00000141664	pink	0.000235644
ENSG00000233954	UQCRHL	ubiquinol-cytochrome c reductase hinge protein like [Source:HGNC Symbol	ENSG00000233954	tan	0.0120697
ENSG00000236444	UBE2L5	ubiquitin conjugating enzyme E2 L5 [Source:HGNC Symbol	ENSG00000236444	tan	0.0903688
ENSG00000237489	C10orf143	chromosome 10 open reading frame 143 [Source:HGNC Symbol	ENSG00000237489	tan	0.465414
ENSG00000244509	APOBEC3C	apolipoprotein B mRNA editing enzyme catalytic subunit 3C [Source:HGNC Symbol	ENSG00000244509	tan	0.580109
ENSG00000248385	TARM1	T cell-interacting, activating receptor on myeloid cells 1 [Source:HGNC Symbol	ENSG00000248385	grey60	0.359756
ENSG00000126756	UXT	ubiquitously expressed prefoldin like chaperone [Source:HGNC Symbol	ENSG00000126756	green	0.0171822
ENSG00000140395	WDR61	WD repeat domain 61 [Source:HGNC Symbol	ENSG00000140395	green	0.0799863
ENSG00000171467	ZNF318	zinc finger protein 318 [Source:HGNC Symbol	ENSG00000171467	pink	0.734982
ENSG00000169180	XPO6	exportin 6 [Source:HGNC Symbol	ENSG00000169180	green	0.19335
ENSG00000174306	ZHX3	zinc fingers and homeoboxes 3 [Source:HGNC Symbol	ENSG00000174306	green	0.247703
ENSG00000152454	ZNF256	zinc finger protein 256 [Source:HGNC Symbol	ENSG00000152454	green	0.192595
ENSG00000251247	ZNF345	zinc finger protein 345 [Source:HGNC Symbol	ENSG00000251247	green	0.0376795
ENSG00000186918	ZNF395	zinc finger protein 395 [Source:HGNC Symbol	ENSG00000186918	green	0.0531472
ENSG00000268223	ARL14EPL	ADP ribosylation factor like GTPase 14 effector protein like [Source:HGNC Symbol	ENSG00000268223	tan	0.88475
ENSG00000268400	None	novel protein	ENSG00000268400	tan	0.305714
ENSG00000198464	ZNF480	zinc finger protein 480 [Source:HGNC Symbol	ENSG00000198464	green	0.0570141
ENSG00000189144	ZNF573	zinc finger protein 573 [Source:HGNC Symbol	ENSG00000189144	pink	0.160041
ENSG00000198093	ZNF649	zinc finger protein 649 [Source:HGNC Symbol	ENSG00000198093	green	0.216093
ENSG00000117010	ZNF684	zinc finger protein 684 [Source:HGNC Symbol	ENSG00000117010	pink	0.00844069
ENSG00000213988	ZNF90	zinc finger protein 90 [Source:HGNC Symbol	ENSG00000213988	green	0.10957
ENSG00000285245	None	novel protein	ENSG00000285245	tan	0.0370594

## Sheet: Neutrophils
initial_alias	name	description	ENSG ID	Module	P value
ENSG00000002549	LAP3	leucine aminopeptidase 3 [Source:HGNC Symbol	ENSG00000002549	blue	0.0068541
ENSG00000003137	CYP26B1	cytochrome P450 family 26 subfamily B member 1 [Source:HGNC Symbol	ENSG00000003137	magenta	0.0325413
ENSG00000003400	CASP10	caspase 10 [Source:HGNC Symbol	ENSG00000003400	blue	0.0201048
ENSG00000005022	SLC25A5	solute carrier family 25 member 5 [Source:HGNC Symbol	ENSG00000005022	blue	0.0786431
ENSG00000005381	MPO	myeloperoxidase [Source:HGNC Symbol	ENSG00000005381	magenta	0.0650882
ENSG00000006194	ZNF263	zinc finger protein 263 [Source:HGNC Symbol	ENSG00000006194	blue	0.177339
ENSG00000008056	SYN1	synapsin I [Source:HGNC Symbol	ENSG00000008056	yellow	0.321932
ENSG00000008869	HEATR5B	HEAT repeat containing 5B [Source:HGNC Symbol	ENSG00000008869	blue	0.0437808
ENSG00000010030	ETV7	ETS variant transcription factor 7 [Source:HGNC Symbol	ENSG00000010030	blue	0.800679
ENSG00000010539	ZNF200	zinc finger protein 200 [Source:HGNC Symbol	ENSG00000010539	blue	0.758976
ENSG00000010818	HIVEP2	HIVEP zinc finger 2 [Source:HGNC Symbol	ENSG00000010818	blue	0.00726594
ENSG00000011243	AKAP8L	A-kinase anchoring protein 8 like [Source:HGNC Symbol	ENSG00000011243	blue	0.14152
ENSG00000013374	NUB1	negative regulator of ubiquitin like proteins 1 [Source:HGNC Symbol	ENSG00000013374	blue	0.0808777
ENSG00000019582	CD74	CD74 molecule [Source:HGNC Symbol	ENSG00000019582	blue	0.136322
ENSG00000023171	GRAMD1B	GRAM domain containing 1B [Source:HGNC Symbol	ENSG00000023171	blue	0.00287437
ENSG00000025708	TYMP	thymidine phosphorylase [Source:HGNC Symbol	ENSG00000025708	blue	0.0723961
ENSG00000026950	BTN3A1	butyrophilin subfamily 3 member A1 [Source:HGNC Symbol	ENSG00000026950	yellow	0.0160138
ENSG00000028116	VRK2	VRK serine/threonine kinase 2 [Source:HGNC Symbol	ENSG00000028116	blue	0.00592123
ENSG00000035720	STAP1	signal transducing adaptor family member 1 [Source:HGNC Symbol	ENSG00000035720	blue	0.0229173
ENSG00000038210	PI4K2B	phosphatidylinositol 4-kinase type 2 beta [Source:HGNC Symbol	ENSG00000038210	blue	0.000458655
ENSG00000053918	KCNQ1	potassium voltage-gated channel subfamily Q member 1 [Source:HGNC Symbol	ENSG00000053918	blue	0.748375
ENSG00000055332	EIF2AK2	eukaryotic translation initiation factor 2 alpha kinase 2 [Source:HGNC Symbol	ENSG00000055332	blue	0.0159973
ENSG00000059377	TBXAS1	thromboxane A synthase 1 [Source:HGNC Symbol	ENSG00000059377	yellow	0.0827327
ENSG00000059378	PARP12	poly(ADP-ribose) polymerase family member 12 [Source:HGNC Symbol	ENSG00000059378	blue	0.0224177
ENSG00000059588	TARBP1	TAR (HIV-1) RNA binding protein 1 [Source:HGNC Symbol	ENSG00000059588	blue	0.0157845
ENSG00000059758	CDK17	cyclin dependent kinase 17 [Source:HGNC Symbol	ENSG00000059758	blue	0.0598914
ENSG00000061938	TNK2	tyrosine kinase non receptor 2 [Source:HGNC Symbol	ENSG00000061938	blue	0.000406445
ENSG00000063978	RNF4	ring finger protein 4 [Source:HGNC Symbol	ENSG00000063978	yellow	0.133599
ENSG00000064763	FAR2	fatty acyl-CoA reductase 2 [Source:HGNC Symbol	ENSG00000064763	blue	0.131075
ENSG00000065427	KARS1	lysyl-tRNA synthetase 1 [Source:HGNC Symbol	ENSG00000065427	blue	0.0866139
ENSG00000067066	SP100	SP100 nuclear antigen [Source:HGNC Symbol	ENSG00000067066	blue	0.018879
ENSG00000067221	STOML1	stomatin like 1 [Source:HGNC Symbol	ENSG00000067221	blue	0.21561
ENSG00000067560	RHOA	ras homolog family member A [Source:HGNC Symbol	ENSG00000067560	blue	0.0052444
ENSG00000068001	HYAL2	hyaluronidase 2 [Source:HGNC Symbol	ENSG00000068001	blue	0.305933
ENSG00000068028	RASSF1	Ras association domain family member 1 [Source:HGNC Symbol	ENSG00000068028	blue	0.450973
ENSG00000068079	IFI35	interferon induced protein 35 [Source:HGNC Symbol	ENSG00000068079	blue	0.0460398
ENSG00000068354	TBC1D25	TBC1 domain family member 25 [Source:HGNC Symbol	ENSG00000068354	blue	0.336286
ENSG00000068784	SRBD1	S1 RNA binding domain 1 [Source:HGNC Symbol	ENSG00000068784	blue	0.0664477
ENSG00000070190	DAPP1	dual adaptor of phosphotyrosine and 3-phosphoinositides 1 [Source:HGNC Symbol	ENSG00000070190	blue	0.0135282
ENSG00000071575	TRIB2	tribbles pseudokinase 2 [Source:HGNC Symbol	ENSG00000071575	blue	0.00825906
ENSG00000072062	PRKACA	protein kinase cAMP-activated catalytic subunit alpha [Source:HGNC Symbol	ENSG00000072062	blue	0.0268007
ENSG00000072121	ZFYVE26	zinc finger FYVE-type containing 26 [Source:HGNC Symbol	ENSG00000072121	blue	0.15093
ENSG00000073169	SELENOO	selenoprotein O [Source:HGNC Symbol	ENSG00000073169	blue	0.0888583
ENSG00000073737	DHRS9	dehydrogenase/reductase 9 [Source:HGNC Symbol	ENSG00000073737	blue	0.00800289
ENSG00000074800	ENO1	enolase 1 [Source:HGNC Symbol	ENSG00000074800	blue	0.0297582
ENSG00000075151	EIF4G3	eukaryotic translation initiation factor 4 gamma 3 [Source:HGNC Symbol	ENSG00000075151	blue	0.0114792
ENSG00000075234	TTC38	tetratricopeptide repeat domain 38 [Source:HGNC Symbol	ENSG00000075234	blue	0.92839
ENSG00000076201	PTPN23	protein tyrosine phosphatase non-receptor type 23 [Source:HGNC Symbol	ENSG00000076201	blue	0.00814208
ENSG00000076984	MAP2K7	mitogen-activated protein kinase kinase 7 [Source:HGNC Symbol	ENSG00000076984	blue	0.1075
ENSG00000078081	LAMP3	lysosomal associated membrane protein 3 [Source:HGNC Symbol	ENSG00000078081	blue	0.0180266
ENSG00000078098	FAP	fibroblast activation protein alpha [Source:HGNC Symbol	ENSG00000078098	blue	0.0044917
ENSG00000078902	TOLLIP	toll interacting protein [Source:HGNC Symbol	ENSG00000078902	blue	0.00800208
ENSG00000079263	SP140	SP140 nuclear body protein [Source:HGNC Symbol	ENSG00000079263	blue	0.0243618
ENSG00000079385	CEACAM1	CEA cell adhesion molecule 1 [Source:HGNC Symbol	ENSG00000079385	blue	0.343874
ENSG00000079739	PGM1	phosphoglucomutase 1 [Source:HGNC Symbol	ENSG00000079739	blue	0.370321
ENSG00000079805	DNM2	dynamin 2 [Source:HGNC Symbol	ENSG00000079805	blue	0.201187
ENSG00000080345	RIF1	replication timing regulatory factor 1 [Source:HGNC Symbol	ENSG00000080345	blue	0.0832273
ENSG00000080986	NDC80	NDC80 kinetochore complex component [Source:HGNC Symbol	ENSG00000080986	blue	0.13921
ENSG00000081791	DELE1	DAP3 binding cell death enhancer 1 [Source:HGNC Symbol	ENSG00000081791	blue	0.136366
ENSG00000082397	EPB41L3	erythrocyte membrane protein band 4.1 like 3 [Source:HGNC Symbol	ENSG00000082397	magenta	0.23996
ENSG00000084112	SSH1	slingshot protein phosphatase 1 [Source:HGNC Symbol	ENSG00000084112	blue	0.115188
ENSG00000086065	CHMP5	charged multivesicular body protein 5 [Source:HGNC Symbol	ENSG00000086065	blue	0.0597427
ENSG00000087237	CETP	cholesteryl ester transfer protein [Source:HGNC Symbol	ENSG00000087237	blue	0.0589324
ENSG00000087253	LPCAT2	lysophosphatidylcholine acyltransferase 2 [Source:HGNC Symbol	ENSG00000087253	blue	0.0947263
ENSG00000087460	GNAS	GNAS complex locus [Source:HGNC Symbol	ENSG00000087460	blue	0.0659764
ENSG00000088827	SIGLEC1	sialic acid binding Ig like lectin 1 [Source:HGNC Symbol	ENSG00000088827	blue	0.0296838
ENSG00000089127	OAS1	2'-5'-oligoadenylate synthetase 1 [Source:HGNC Symbol	ENSG00000089127	blue	0.0306476
ENSG00000089248	ERP29	endoplasmic reticulum protein 29 [Source:HGNC Symbol	ENSG00000089248	blue	0.0424164
ENSG00000090372	STRN4	striatin 4 [Source:HGNC Symbol	ENSG00000090372	blue	0.0648974
ENSG00000092010	PSME1	proteasome activator subunit 1 [Source:HGNC Symbol	ENSG00000092010	blue	0.0997039
ENSG00000092847	2001-08-01	argonaute RISC component 1 [Source:HGNC Symbol	ENSG00000092847	yellow	0.0240176
ENSG00000099308	MAST3	microtubule associated serine/threonine kinase 3 [Source:HGNC Symbol	ENSG00000099308	blue	0.0134554
ENSG00000099381	SETD1A	SET domain containing 1A, histone lysine methyltransferase [Source:HGNC Symbol	ENSG00000099381	blue	0.479661
ENSG00000099840	IZUMO4	IZUMO family member 4 [Source:HGNC Symbol	ENSG00000099840	yellow	0.0268181
ENSG00000100228	RAB36	RAB36, member RAS oncogene family [Source:HGNC Symbol	ENSG00000100228	blue	0.186527
ENSG00000100342	APOL1	apolipoprotein L1 [Source:HGNC Symbol	ENSG00000100342	blue	0.0429573
ENSG00000100401	RANGAP1	Ran GTPase activating protein 1 [Source:HGNC Symbol	ENSG00000100401	blue	0.0825477
ENSG00000100425	BRD1	bromodomain containing 1 [Source:HGNC Symbol	ENSG00000100425	blue	0.961046
ENSG00000100523	DDHD1	DDHD domain containing 1 [Source:HGNC Symbol	ENSG00000100523	yellow	0.0122974
ENSG00000100528	CNIH1	cornichon family AMPA receptor auxiliary protein 1 [Source:HGNC Symbol	ENSG00000100528	blue	0.0614425
ENSG00000100897	DCAF11	DDB1 and CUL4 associated factor 11 [Source:HGNC Symbol	ENSG00000100897	blue	0.366231
ENSG00000100908	EMC9	ER membrane protein complex subunit 9 [Source:HGNC Symbol	ENSG00000100908	blue	0.0896845
ENSG00000100911	PSME2	proteasome activator subunit 2 [Source:HGNC Symbol	ENSG00000100911	blue	0.153503
ENSG00000100918	REC8	REC8 meiotic recombination protein [Source:HGNC Symbol	ENSG00000100918	blue	0.381688
ENSG00000101182	PSMA7	proteasome 20S subunit alpha 7 [Source:HGNC Symbol	ENSG00000101182	blue	0.00522762
ENSG00000101216	GMEB2	glucocorticoid modulatory element binding protein 2 [Source:HGNC Symbol	ENSG00000101216	blue	0.345544
ENSG00000101342	TLDC2	TBC/LysM-associated domain containing 2 [Source:HGNC Symbol	ENSG00000101342	blue	0.0193325
ENSG00000101347	SAMHD1	SAM and HD domain containing deoxynucleoside triphosphate triphosphohydrolase 1 [Source:HGNC Symbol	ENSG00000101347	blue	0.0128825
ENSG00000101474	APMAP	adipocyte plasma membrane associated protein [Source:HGNC Symbol	ENSG00000101474	blue	0.0348337
ENSG00000101574	METTL4	methyltransferase 4, N6-adenosine [Source:HGNC Symbol	ENSG00000101574	blue	0.659583
ENSG00000101888	NXT2	nuclear transport factor 2 like export factor 2 [Source:HGNC Symbol	ENSG00000101888	blue	0.0103145
ENSG00000101986	ABCD1	ATP binding cassette subfamily D member 1 [Source:HGNC Symbol	ENSG00000101986	blue	0.0314878
ENSG00000102125	TAFAZZIN	tafazzin, phospholipid-lysophospholipid transacylase [Source:HGNC Symbol	ENSG00000102125	blue	0.143492
ENSG00000102144	PGK1	phosphoglycerate kinase 1 [Source:HGNC Symbol	ENSG00000102144	blue	0.107913
ENSG00000102524	TNFSF13B	TNF superfamily member 13b [Source:HGNC Symbol	ENSG00000102524	blue	0.0222572
ENSG00000102554	KLF5	Kruppel like factor 5 [Source:HGNC Symbol	ENSG00000102554	blue	0.323502
ENSG00000102897	LYRM1	LYR motif containing 1 [Source:HGNC Symbol	ENSG00000102897	yellow	0.0615915
ENSG00000104312	RIPK2	receptor interacting serine/threonine kinase 2 [Source:HGNC Symbol	ENSG00000104312	blue	0.304203
ENSG00000104689	TNFRSF10A	TNF receptor superfamily member 10a [Source:HGNC Symbol	ENSG00000104689	blue	0.0131959
ENSG00000104812	GYS1	glycogen synthase 1 [Source:HGNC Symbol	ENSG00000104812	blue	0.0415062
ENSG00000105402	NAPA	NSF attachment protein alpha [Source:HGNC Symbol	ENSG00000105402	blue	0.0946582
ENSG00000105568	PPP2R1A	protein phosphatase 2 scaffold subunit Aalpha [Source:HGNC Symbol	ENSG00000105568	blue	0.255973
ENSG00000105939	ZC3HAV1	zinc finger CCCH-type containing, antiviral 1 [Source:HGNC Symbol	ENSG00000105939	blue	0.0533886
ENSG00000105967	TFEC	transcription factor EC [Source:HGNC Symbol	ENSG00000105967	blue	0.00835313
ENSG00000106066	CPVL	carboxypeptidase vitellogenic like [Source:HGNC Symbol	ENSG00000106066	magenta	0.0472995
ENSG00000106100	NOD1	nucleotide binding oligomerization domain containing 1 [Source:HGNC Symbol	ENSG00000106100	blue	0.0207198
ENSG00000106344	RBM28	RNA binding motif protein 28 [Source:HGNC Symbol	ENSG00000106344	yellow	0.0629191
ENSG00000106392	C1GALT1	core 1 synthase, glycoprotein-N-acetylgalactosamine 3-beta-galactosyltransferase 1 [Source:HGNC Symbol	ENSG00000106392	blue	0.0550155
ENSG00000106560	GIMAP2	GTPase, IMAP family member 2 [Source:HGNC Symbol	ENSG00000106560	blue	0.190065
ENSG00000106617	PRKAG2	protein kinase AMP-activated non-catalytic subunit gamma 2 [Source:HGNC Symbol	ENSG00000106617	blue	0.0355837
ENSG00000106785	TRIM14	tripartite motif containing 14 [Source:HGNC Symbol	ENSG00000106785	blue	0.520111
ENSG00000106804	C5	complement C5 [Source:HGNC Symbol	ENSG00000106804	blue	0.00936522
ENSG00000107021	TBC1D13	TBC1 domain family member 13 [Source:HGNC Symbol	ENSG00000107021	blue	0.0318394
ENSG00000107099	DOCK8	dedicator of cytokinesis 8 [Source:HGNC Symbol	ENSG00000107099	blue	0.0515118
ENSG00000107201	DDX58	DExD/H-box helicase 58 [Source:HGNC Symbol	ENSG00000107201	blue	0.0172605
ENSG00000107742	SPOCK2	SPARC (osteonectin), cwcv and kazal like domains proteoglycan 2 [Source:HGNC Symbol	ENSG00000107742	blue	0.0157312
ENSG00000107798	LIPA	lipase A, lysosomal acid type [Source:HGNC Symbol	ENSG00000107798	blue	0.00303142
ENSG00000108100	CCNY	cyclin Y [Source:HGNC Symbol	ENSG00000108100	blue	0.0303144
ENSG00000108349	CASC3	CASC3 exon junction complex subunit [Source:HGNC Symbol	ENSG00000108349	blue	0.000203168
ENSG00000108387	SEPTIN4	septin 4 [Source:HGNC Symbol	ENSG00000108387	blue	0.011485
ENSG00000108424	KPNB1	karyopherin subunit beta 1 [Source:HGNC Symbol	ENSG00000108424	blue	0.339199
ENSG00000108557	RAI1	retinoic acid induced 1 [Source:HGNC Symbol	ENSG00000108557	blue	0.357255
ENSG00000108771	DHX58	DExH-box helicase 58 [Source:HGNC Symbol	ENSG00000108771	blue	0.0142646
ENSG00000108828	VAT1	vesicle amine transport 1 [Source:HGNC Symbol	ENSG00000108828	blue	0.129163
ENSG00000109511	ANXA10	annexin A10 [Source:HGNC Symbol	ENSG00000109511	blue	0.0244258
ENSG00000110057	UNC93B1	unc-93 homolog B1, TLR signaling regulator [Source:HGNC Symbol	ENSG00000110057	blue	0.00585987
ENSG00000110066	KMT5B	lysine methyltransferase 5B [Source:HGNC Symbol	ENSG00000110066	blue	0.0630221
ENSG00000110848	CD69	CD69 molecule [Source:HGNC Symbol	ENSG00000110848	blue	0.496819
ENSG00000110880	CORO1C	coronin 1C [Source:HGNC Symbol	ENSG00000110880	blue	0.0150096
ENSG00000110944	IL23A	interleukin 23 subunit alpha [Source:HGNC Symbol	ENSG00000110944	blue	0.0250418
ENSG00000111224	PARP11	poly(ADP-ribose) polymerase family member 11 [Source:HGNC Symbol	ENSG00000111224	blue	0.146807
ENSG00000111300	NAA25	N-alpha-acetyltransferase 25, NatB auxiliary subunit [Source:HGNC Symbol	ENSG00000111300	blue	0.0150112
ENSG00000111331	OAS3	2'-5'-oligoadenylate synthetase 3 [Source:HGNC Symbol	ENSG00000111331	blue	0.0361785
ENSG00000111335	OAS2	2'-5'-oligoadenylate synthetase 2 [Source:HGNC Symbol	ENSG00000111335	blue	0.0346423
ENSG00000111405	ENDOU	endonuclease, poly(U) specific [Source:HGNC Symbol	ENSG00000111405	blue	0.0801807
ENSG00000111481	COPZ1	COPI coat complex subunit zeta 1 [Source:HGNC Symbol	ENSG00000111481	blue	0.00582772
ENSG00000111602	TIMELESS	timeless circadian regulator [Source:HGNC Symbol	ENSG00000111602	blue	0.302668
ENSG00000111801	BTN3A3	butyrophilin subfamily 3 member A3 [Source:HGNC Symbol	ENSG00000111801	blue	0.0331889
ENSG00000111802	TDP2	tyrosyl-DNA phosphodiesterase 2 [Source:HGNC Symbol	ENSG00000111802	blue	0.144244
ENSG00000111912	NCOA7	nuclear receptor coactivator 7 [Source:HGNC Symbol	ENSG00000111912	blue	0.0105927
ENSG00000112078	KCTD20	potassium channel tetramerization domain containing 20 [Source:HGNC Symbol	ENSG00000112078	blue	0.0254834
ENSG00000112195	TREML2	triggering receptor expressed on myeloid cells like 2 [Source:HGNC Symbol	ENSG00000112195	yellow	0.00119892
ENSG00000112343	TRIM38	tripartite motif containing 38 [Source:HGNC Symbol	ENSG00000112343	blue	0.245767
ENSG00000112419	PHACTR2	phosphatase and actin regulator 2 [Source:HGNC Symbol	ENSG00000112419	blue	0.0109661
ENSG00000112640	PPP2R5D	protein phosphatase 2 regulatory subunit B'delta [Source:HGNC Symbol	ENSG00000112640	blue	0.202607
ENSG00000112773	TENT5A	terminal nucleotidyltransferase 5A [Source:HGNC Symbol	ENSG00000112773	blue	0.0436369
ENSG00000114127	XRN1	5'-3' exoribonuclease 1 [Source:HGNC Symbol	ENSG00000114127	blue	0.0461331
ENSG00000114378	HYAL1	hyaluronidase 1 [Source:HGNC Symbol	ENSG00000114378	blue	0.362898
ENSG00000114388	NPRL2	NPR2 like, GATOR1 complex subunit [Source:HGNC Symbol	ENSG00000114388	blue	0.302457
ENSG00000114439	BBX	BBX high mobility group box domain containing [Source:HGNC Symbol	ENSG00000114439	blue	0.000513166
ENSG00000114450	GNB4	G protein subunit beta 4 [Source:HGNC Symbol	ENSG00000114450	blue	0.00387848
ENSG00000114745	GORASP1	golgi reassembly stacking protein 1 [Source:HGNC Symbol	ENSG00000114745	blue	0.156769
ENSG00000114770	ABCC5	ATP binding cassette subfamily C member 5 [Source:HGNC Symbol	ENSG00000114770	blue	0.00461755
ENSG00000114867	EIF4G1	eukaryotic translation initiation factor 4 gamma 1 [Source:HGNC Symbol	ENSG00000114867	blue	0.126664
ENSG00000115109	EPB41L5	erythrocyte membrane protein band 4.1 like 5 [Source:HGNC Symbol	ENSG00000115109	blue	0.0654035
ENSG00000115267	IFIH1	interferon induced with helicase C domain 1 [Source:HGNC Symbol	ENSG00000115267	blue	0.020685
ENSG00000115339	GALNT3	polypeptide N-acetylgalactosaminyltransferase 3 [Source:HGNC Symbol	ENSG00000115339	blue	0.000527438
ENSG00000115392	FANCL	FA complementation group L [Source:HGNC Symbol	ENSG00000115392	blue	0.0154711
ENSG00000115415	STAT1	signal transducer and activator of transcription 1 [Source:HGNC Symbol	ENSG00000115415	blue	0.372297
ENSG00000115525	ST3GAL5	ST3 beta-galactoside alpha-2,3-sialyltransferase 5 [Source:HGNC Symbol	ENSG00000115525	magenta	0.0082258
ENSG00000116663	FBXO6	F-box protein 6 [Source:HGNC Symbol	ENSG00000116663	blue	0.247881
ENSG00000117010	ZNF684	zinc finger protein 684 [Source:HGNC Symbol	ENSG00000117010	blue	0.410652
ENSG00000117226	GBP3	guanylate binding protein 3 [Source:HGNC Symbol	ENSG00000117226	blue	0.00825917
ENSG00000117228	GBP1	guanylate binding protein 1 [Source:HGNC Symbol	ENSG00000117228	blue	0.0635159
ENSG00000117394	SLC2A1	solute carrier family 2 member 1 [Source:HGNC Symbol	ENSG00000117394	blue	0.082338
ENSG00000117410	ATP6V0B	ATPase H+ transporting V0 subunit b [Source:HGNC Symbol	ENSG00000117410	blue	0.119919
ENSG00000117592	PRDX6	peroxiredoxin 6 [Source:HGNC Symbol	ENSG00000117592	blue	0.591362
ENSG00000117676	RPS6KA1	ribosomal protein S6 kinase A1 [Source:HGNC Symbol	ENSG00000117676	blue	0.00661007
ENSG00000118162	KPTN	kaptin, actin binding protein [Source:HGNC Symbol	ENSG00000118162	blue	0.023664
ENSG00000118197	DDX59	DEAD-box helicase 59 [Source:HGNC Symbol	ENSG00000118197	blue	0.00825705
ENSG00000119397	CNTRL	centriolin [Source:HGNC Symbol	ENSG00000119397	blue	0.00721478
ENSG00000119522	DENND1A	DENN domain containing 1A [Source:HGNC Symbol	ENSG00000119522	yellow	0.0874727
ENSG00000119950	MXI1	MAX interactor 1, dimerization protein [Source:HGNC Symbol	ENSG00000119950	blue	0.0714153
ENSG00000120280	TASL	TLR adaptor interacting with endolysosomal SLC15A4 [Source:HGNC Symbol	ENSG00000120280	blue	0.000886339
ENSG00000120539	MASTL	microtubule associated serine/threonine kinase like [Source:HGNC Symbol	ENSG00000120539	blue	0.0108264
ENSG00000120647	CCDC77	coiled-coil domain containing 77 [Source:HGNC Symbol	ENSG00000120647	yellow	0.127293
ENSG00000120675	DNAJC15	DnaJ heat shock protein family (Hsp40) member C15 [Source:HGNC Symbol	ENSG00000120675	blue	0.00200358
ENSG00000120690	ELF1	E74 like ETS transcription factor 1 [Source:HGNC Symbol	ENSG00000120690	blue	0.227792
ENSG00000120708	TGFBI	transforming growth factor beta induced [Source:HGNC Symbol	ENSG00000120708	magenta	0.0149717
ENSG00000120733	KDM3B	lysine demethylase 3B [Source:HGNC Symbol	ENSG00000120733	yellow	0.163428
ENSG00000120802	TMPO	thymopoietin [Source:HGNC Symbol	ENSG00000120802	magenta	0.127254
ENSG00000120899	PTK2B	protein tyrosine kinase 2 beta [Source:HGNC Symbol	ENSG00000120899	blue	0.799746
ENSG00000121060	TRIM25	tripartite motif containing 25 [Source:HGNC Symbol	ENSG00000121060	yellow	0.103521
ENSG00000121281	ADCY7	adenylate cyclase 7 [Source:HGNC Symbol	ENSG00000121281	blue	0.00508754
ENSG00000121775	TMEM39B	transmembrane protein 39B [Source:HGNC Symbol	ENSG00000121775	blue	0.0510014
ENSG00000121858	TNFSF10	TNF superfamily member 10 [Source:HGNC Symbol	ENSG00000121858	blue	0.021968
ENSG00000122643	NT5C3A	5'-nucleotidase, cytosolic IIIA [Source:HGNC Symbol	ENSG00000122643	blue	0.00482169
ENSG00000122729	ACO1	aconitase 1 [Source:HGNC Symbol	ENSG00000122729	blue	0.00198511
ENSG00000122733	PHF24	PHD finger protein 24 [Source:HGNC Symbol	ENSG00000122733	blue	0.0151354
ENSG00000123130	ACOT9	acyl-CoA thioesterase 9 [Source:HGNC Symbol	ENSG00000123130	blue	0.961871
ENSG00000123384	LRP1	LDL receptor related protein 1 [Source:HGNC Symbol	ENSG00000123384	magenta	0.0175879
ENSG00000123609	NMI	N-myc and STAT interactor [Source:HGNC Symbol	ENSG00000123609	blue	0.021423
ENSG00000123643	SLC36A1	solute carrier family 36 member 1 [Source:HGNC Symbol	ENSG00000123643	blue	0.0501158
ENSG00000123737	EXOSC9	exosome component 9 [Source:HGNC Symbol	ENSG00000123737	blue	0.193605
ENSG00000124256	ZBP1	Z-DNA binding protein 1 [Source:HGNC Symbol	ENSG00000124256	blue	0.072672
ENSG00000124357	NAGK	N-acetylglucosamine kinase [Source:HGNC Symbol	ENSG00000124357	blue	0.180174
ENSG00000124508	BTN2A2	butyrophilin subfamily 2 member A2 [Source:HGNC Symbol	ENSG00000124508	blue	0.171496
ENSG00000124688	MAD2L1BP	MAD2L1 binding protein [Source:HGNC Symbol	ENSG00000124688	blue	0.0216957
ENSG00000124713	GNMT	glycine N-methyltransferase [Source:HGNC Symbol	ENSG00000124713	blue	0.0594869
ENSG00000125089	SH3TC1	SH3 domain and tetratricopeptide repeats 1 [Source:HGNC Symbol	ENSG00000125089	magenta	0.0710002
ENSG00000125148	MT2A	metallothionein 2A [Source:HGNC Symbol	ENSG00000125148	blue	0.0655687
ENSG00000125149	PHAF1	phagosome assembly factor 1 [Source:HGNC Symbol	ENSG00000125149	blue	0.0098867
ENSG00000125779	PANK2	pantothenate kinase 2 [Source:HGNC Symbol	ENSG00000125779	blue	0.00107427
ENSG00000125826	RBCK1	RANBP2-type and C3HC4-type zinc finger containing 1 [Source:HGNC Symbol	ENSG00000125826	blue	0.0318931
ENSG00000126351	THRA	thyroid hormone receptor alpha [Source:HGNC Symbol	ENSG00000126351	blue	0.0861434
ENSG00000126709	IFI6	interferon alpha inducible protein 6 [Source:HGNC Symbol	ENSG00000126709	blue	0.0213574
ENSG00000126858	RHOT1	ras homolog family member T1 [Source:HGNC Symbol	ENSG00000126858	blue	0.260431
ENSG00000128203	ASPHD2	aspartate beta-hydroxylase domain containing 2 [Source:HGNC Symbol	ENSG00000128203	yellow	0.0234521
ENSG00000128284	APOL3	apolipoprotein L3 [Source:HGNC Symbol	ENSG00000128284	blue	0.00823262
ENSG00000128335	APOL2	apolipoprotein L2 [Source:HGNC Symbol	ENSG00000128335	blue	0.0146308
ENSG00000128394	APOBEC3F	apolipoprotein B mRNA editing enzyme catalytic subunit 3F [Source:HGNC Symbol	ENSG00000128394	blue	0.032985
ENSG00000128512	DOCK4	dedicator of cytokinesis 4 [Source:HGNC Symbol	ENSG00000128512	blue	0.00161437
ENSG00000128604	IRF5	interferon regulatory factor 5 [Source:HGNC Symbol	ENSG00000128604	blue	0.035505
ENSG00000129450	SIGLEC9	sialic acid binding Ig like lectin 9 [Source:HGNC Symbol	ENSG00000129450	yellow	0.00225092
ENSG00000129667	RHBDF2	rhomboid 5 homolog 2 [Source:HGNC Symbol	ENSG00000129667	blue	0.066779
ENSG00000130066	SAT1	spermidine/spermine N1-acetyltransferase 1 [Source:HGNC Symbol	ENSG00000130066	blue	0.136201
ENSG00000130244	FAM98C	family with sequence similarity 98 member C [Source:HGNC Symbol	ENSG00000130244	blue	0.160841
ENSG00000130300	PLVAP	plasmalemma vesicle associated protein [Source:HGNC Symbol	ENSG00000130300	blue	0.0653115
ENSG00000130303	BST2	bone marrow stromal cell antigen 2 [Source:HGNC Symbol	ENSG00000130303	blue	0.0530239
ENSG00000130589	HELZ2	helicase with zinc finger 2 [Source:HGNC Symbol	ENSG00000130589	blue	0.0101252
ENSG00000130640	TUBGCP2	tubulin gamma complex associated protein 2 [Source:HGNC Symbol	ENSG00000130640	blue	0.582511
ENSG00000130699	TAF4	TATA-box binding protein associated factor 4 [Source:HGNC Symbol	ENSG00000130699	blue	0.319865
ENSG00000130779	CLIP1	CAP-Gly domain containing linker protein 1 [Source:HGNC Symbol	ENSG00000130779	blue	0.502654
ENSG00000130813	SHFL	shiftless antiviral inhibitor of ribosomal frameshifting [Source:HGNC Symbol	ENSG00000130813	blue	0.0527121
ENSG00000131203	IDO1	indoleamine 2,3-dioxygenase 1 [Source:HGNC Symbol	ENSG00000131203	blue	0.036221
ENSG00000131355	ADGRE3	adhesion G protein-coupled receptor E3 [Source:HGNC Symbol	ENSG00000131355	yellow	0.00574418
ENSG00000131389	SLC6A6	solute carrier family 6 member 6 [Source:HGNC Symbol	ENSG00000131389	yellow	0.00448197
ENSG00000131626	PPFIA1	PTPRF interacting protein alpha 1 [Source:HGNC Symbol	ENSG00000131626	blue	0.0548534
ENSG00000131943	C19orf12	chromosome 19 open reading frame 12 [Source:HGNC Symbol	ENSG00000131943	yellow	0.000289867
ENSG00000132109	TRIM21	tripartite motif containing 21 [Source:HGNC Symbol	ENSG00000132109	blue	0.302871
ENSG00000132256	TRIM5	tripartite motif containing 5 [Source:HGNC Symbol	ENSG00000132256	blue	0.0773054
ENSG00000132376	INPP5K	inositol polyphosphate-5-phosphatase K [Source:HGNC Symbol	ENSG00000132376	blue	0.318485
ENSG00000132470	ITGB4	integrin subunit beta 4 [Source:HGNC Symbol	ENSG00000132470	blue	0.120311
ENSG00000132530	XAF1	XIAP associated factor 1 [Source:HGNC Symbol	ENSG00000132530	blue	0.0605753
ENSG00000132669	RIN2	Ras and Rab interactor 2 [Source:HGNC Symbol	ENSG00000132669	blue	0.0573419
ENSG00000132780	NASP	nuclear autoantigenic sperm protein [Source:HGNC Symbol	ENSG00000132780	yellow	0.00796429
ENSG00000133106	EPSTI1	epithelial stromal interaction 1 [Source:HGNC Symbol	ENSG00000133106	blue	0.0151514
ENSG00000133321	PLAAT4	phospholipase A and acyltransferase 4 [Source:HGNC Symbol	ENSG00000133321	blue	0.0382005
ENSG00000133574	GIMAP4	GTPase, IMAP family member 4 [Source:HGNC Symbol	ENSG00000133574	blue	0.671858
ENSG00000134243	SORT1	sortilin 1 [Source:HGNC Symbol	ENSG00000134243	blue	0.576027
ENSG00000134318	ROCK2	Rho associated coiled-coil containing protein kinase 2 [Source:HGNC Symbol	ENSG00000134318	yellow	0.00381682
ENSG00000134321	RSAD2	radical S-adenosyl methionine domain containing 2 [Source:HGNC Symbol	ENSG00000134321	blue	0.020376
ENSG00000134326	CMPK2	cytidine/uridine monophosphate kinase 2 [Source:HGNC Symbol	ENSG00000134326	blue	0.012955
ENSG00000134809	TIMM10	translocase of inner mitochondrial membrane 10 [Source:HGNC Symbol	ENSG00000134809	blue	0.000294522
ENSG00000134830	C5AR2	complement C5a receptor 2 [Source:HGNC Symbol	ENSG00000134830	yellow	0.0687136
ENSG00000135074	ADAM19	ADAM metallopeptidase domain 19 [Source:HGNC Symbol	ENSG00000135074	blue	0.0228662
ENSG00000135083	CCNJL	cyclin J like [Source:HGNC Symbol	ENSG00000135083	yellow	0.0499537
ENSG00000135114	OASL	2'-5'-oligoadenylate synthetase like [Source:HGNC Symbol	ENSG00000135114	blue	0.245214
ENSG00000135148	TRAFD1	TRAF-type zinc finger domain containing 1 [Source:HGNC Symbol	ENSG00000135148	blue	0.0638426
ENSG00000135315	CEP162	centrosomal protein 162 [Source:HGNC Symbol	ENSG00000135315	blue	0.109175
ENSG00000135363	LMO2	LIM domain only 2 [Source:HGNC Symbol	ENSG00000135363	blue	0.064156
ENSG00000135838	NPL	N-acetylneuraminate pyruvate lyase [Source:HGNC Symbol	ENSG00000135838	yellow	0.00218495
ENSG00000135899	SP110	SP110 nuclear body protein [Source:HGNC Symbol	ENSG00000135899	blue	0.278601
ENSG00000135924	DNAJB2	DnaJ heat shock protein family (Hsp40) member B2 [Source:HGNC Symbol	ENSG00000135924	blue	0.0775978
ENSG00000135930	EIF4E2	eukaryotic translation initiation factor 4E family member 2 [Source:HGNC Symbol	ENSG00000135930	blue	0.0192161
ENSG00000136104	RNASEH2B	ribonuclease H2 subunit B [Source:HGNC Symbol	ENSG00000136104	blue	0.130971
ENSG00000136147	PHF11	PHD finger protein 11 [Source:HGNC Symbol	ENSG00000136147	blue	0.0924513
ENSG00000136231	IGF2BP3	insulin like growth factor 2 mRNA binding protein 3 [Source:HGNC Symbol	ENSG00000136231	blue	0.00420944
ENSG00000136514	RTP4	receptor transporter protein 4 [Source:HGNC Symbol	ENSG00000136514	blue	0.00861288
ENSG00000136689	IL1RN	interleukin 1 receptor antagonist [Source:HGNC Symbol	ENSG00000136689	blue	0.0491245
ENSG00000136770	DNAJC1	DnaJ heat shock protein family (Hsp40) member C1 [Source:HGNC Symbol	ENSG00000136770	yellow	0.0903807
ENSG00000136802	LRRC8A	leucine rich repeat containing 8 VRAC subunit A [Source:HGNC Symbol	ENSG00000136802	blue	0.499957
ENSG00000136807	CDK9	cyclin dependent kinase 9 [Source:HGNC Symbol	ENSG00000136807	blue	0.251783
ENSG00000136816	TOR1B	torsin family 1 member B [Source:HGNC Symbol	ENSG00000136816	blue	0.0606306
ENSG00000136874	STX17	syntaxin 17 [Source:HGNC Symbol	ENSG00000136874	blue	0.0158375
ENSG00000137171	KLC4	kinesin light chain 4 [Source:HGNC Symbol	ENSG00000137171	yellow	0.370051
ENSG00000137200	CMTR1	cap methyltransferase 1 [Source:HGNC Symbol	ENSG00000137200	blue	0.0150251
ENSG00000137628	DDX60	DExD/H-box helicase 60 [Source:HGNC Symbol	ENSG00000137628	blue	0.00820761
ENSG00000137752	CASP1	caspase 1 [Source:HGNC Symbol	ENSG00000137752	blue	0.183035
ENSG00000137757	CASP5	caspase 5 [Source:HGNC Symbol	ENSG00000137757	blue	0.384372
ENSG00000137815	RTF1	RTF1 homolog, Paf1/RNA polymerase II complex component [Source:HGNC Symbol	ENSG00000137815	blue	0.482687
ENSG00000137842	TMEM62	transmembrane protein 62 [Source:HGNC Symbol	ENSG00000137842	blue	0.00361629
ENSG00000137959	IFI44L	interferon induced protein 44 like [Source:HGNC Symbol	ENSG00000137959	blue	0.0261481
ENSG00000137965	IFI44	interferon induced protein 44 [Source:HGNC Symbol	ENSG00000137965	blue	0.0208681
ENSG00000138018	SELENOI	selenoprotein I [Source:HGNC Symbol	ENSG00000138018	blue	0.181771
ENSG00000138035	PNPT1	polyribonucleotide nucleotidyltransferase 1 [Source:HGNC Symbol	ENSG00000138035	blue	0.0250381
ENSG00000138119	MYOF	myoferlin [Source:HGNC Symbol	ENSG00000138119	magenta	0.135737
ENSG00000138175	ARL3	ADP ribosylation factor like GTPase 3 [Source:HGNC Symbol	ENSG00000138175	blue	0.118963
ENSG00000138246	DNAJC13	DnaJ heat shock protein family (Hsp40) member C13 [Source:HGNC Symbol	ENSG00000138246	blue	0.00673024
ENSG00000138279	ANXA7	annexin A7 [Source:HGNC Symbol	ENSG00000138279	blue	0.222788
ENSG00000138376	BARD1	BRCA1 associated RING domain 1 [Source:HGNC Symbol	ENSG00000138376	blue	0.156819
ENSG00000138385	SSB	small RNA binding exonuclease protection factor La [Source:HGNC Symbol	ENSG00000138385	blue	0.222721
ENSG00000138434	ITPRID2	ITPR interacting domain containing 2 [Source:HGNC Symbol	ENSG00000138434	blue	0.098659
ENSG00000138496	PARP9	poly(ADP-ribose) polymerase family member 9 [Source:HGNC Symbol	ENSG00000138496	blue	0.173315
ENSG00000138642	HERC6	HECT and RLD domain containing E3 ubiquitin protein ligase family member 6 [Source:HGNC Symbol	ENSG00000138642	blue	0.0134167
ENSG00000138646	HERC5	HECT and RLD domain containing E3 ubiquitin protein ligase 5 [Source:HGNC Symbol	ENSG00000138646	blue	0.0155131
ENSG00000138688	KIAA1109	KIAA1109 [Source:HGNC Symbol	ENSG00000138688	blue	0.0394519
ENSG00000138760	SCARB2	scavenger receptor class B member 2 [Source:HGNC Symbol	ENSG00000138760	blue	0.00543909
ENSG00000139618	BRCA2	BRCA2 DNA repair associated [Source:HGNC Symbol	ENSG00000139618	blue	0.0455337
ENSG00000139645	ANKRD52	ankyrin repeat domain 52 [Source:HGNC Symbol	ENSG00000139645	blue	0.0993297
ENSG00000140105	WARS1	tryptophanyl-tRNA synthetase 1 [Source:HGNC Symbol	ENSG00000140105	blue	0.0935623
ENSG00000140280	LYSMD2	LysM domain containing 2 [Source:HGNC Symbol	ENSG00000140280	blue	0.0428308
ENSG00000140443	IGF1R	insulin like growth factor 1 receptor [Source:HGNC Symbol	ENSG00000140443	blue	0.622177
ENSG00000140464	PML	PML nuclear body scaffold [Source:HGNC Symbol	ENSG00000140464	blue	0.0619492
ENSG00000140521	POLG	DNA polymerase gamma, catalytic subunit [Source:HGNC Symbol	ENSG00000140521	blue	0.0928524
ENSG00000140807	NKD1	NKD inhibitor of WNT signaling pathway 1 [Source:HGNC Symbol	ENSG00000140807	blue	0.0287759
ENSG00000140853	NLRC5	NLR family CARD domain containing 5 [Source:HGNC Symbol	ENSG00000140853	blue	0.317286
ENSG00000141337	ARSG	arylsulfatase G [Source:HGNC Symbol	ENSG00000141337	blue	0.0499978
ENSG00000141447	OSBPL1A	oxysterol binding protein like 1A [Source:HGNC Symbol	ENSG00000141447	blue	0.288433
ENSG00000141664	ZCCHC2	zinc finger CCHC-type containing 2 [Source:HGNC Symbol	ENSG00000141664	blue	0.00212827
ENSG00000141858	SAMD1	sterile alpha motif domain containing 1 [Source:HGNC Symbol	ENSG00000141858	blue	0.0135674
ENSG00000141905	NFIC	nuclear factor I C [Source:HGNC Symbol	ENSG00000141905	blue	0.0116013
ENSG00000141971	MVB12A	multivesicular body subunit 12A [Source:HGNC Symbol	ENSG00000141971	blue	0.0407101
ENSG00000141977	CIB3	calcium and integrin binding family member 3 [Source:HGNC Symbol	ENSG00000141977	blue	0.0269115
ENSG00000142089	IFITM3	interferon induced transmembrane protein 3 [Source:HGNC Symbol	ENSG00000142089	blue	0.0218453
ENSG00000142327	RNPEPL1	arginyl aminopeptidase like 1 [Source:HGNC Symbol	ENSG00000142327	blue	0.238139
ENSG00000142405	NLRP12	NLR family pyrin domain containing 12 [Source:HGNC Symbol	ENSG00000142405	blue	0.147877
ENSG00000142599	RERE	arginine-glutamic acid dipeptide repeats [Source:HGNC Symbol	ENSG00000142599	blue	0.0019664
ENSG00000142687	KIAA0319L	KIAA0319 like [Source:HGNC Symbol	ENSG00000142687	blue	0.0208359
ENSG00000143033	MTF2	metal response element binding transcription factor 2 [Source:HGNC Symbol	ENSG00000143033	blue	0.0339593
ENSG00000143554	SLC27A3	solute carrier family 27 member 3 [Source:HGNC Symbol	ENSG00000143554	blue	0.0977113
ENSG00000143614	GATAD2B	GATA zinc finger domain containing 2B [Source:HGNC Symbol	ENSG00000143614	yellow	0.00922943
ENSG00000143889	HNRNPLL	heterogeneous nuclear ribonucleoprotein L like [Source:HGNC Symbol	ENSG00000143889	blue	0.00255762
ENSG00000143891	GALM	galactose mutarotase [Source:HGNC Symbol	ENSG00000143891	blue	0.0618317
ENSG00000144040	SFXN5	sideroflexin 5 [Source:HGNC Symbol	ENSG00000144040	blue	0.883516
ENSG00000144848	ATG3	autophagy related 3 [Source:HGNC Symbol	ENSG00000144848	blue	0.0778297
ENSG00000145016	RUBCN	rubicon autophagy regulator [Source:HGNC Symbol	ENSG00000145016	blue	0.179937
ENSG00000145191	EIF2B5	eukaryotic translation initiation factor 2B subunit epsilon [Source:HGNC Symbol	ENSG00000145191	blue	3.93e-05
ENSG00000145337	PYURF	PIGY upstream open reading frame [Source:HGNC Symbol	ENSG00000145337	blue	0.429339
ENSG00000145685	LHFPL2	LHFPL tetraspan subfamily member 2 [Source:HGNC Symbol	ENSG00000145685	blue	0.15623
ENSG00000146083	RNF44	ring finger protein 44 [Source:HGNC Symbol	ENSG00000146083	blue	0.0196912
ENSG00000146192	FGD2	FYVE, RhoGEF and PH domain containing 2 [Source:HGNC Symbol	ENSG00000146192	magenta	0.000994019
ENSG00000146433	TMEM181	transmembrane protein 181 [Source:HGNC Symbol	ENSG00000146433	blue	0.2241
ENSG00000147394	ZNF185	zinc finger protein 185 with LIM domain [Source:HGNC Symbol	ENSG00000147394	yellow	0.147256
ENSG00000147996	CBWD5	COBW domain containing 5 [Source:HGNC Symbol	ENSG00000147996	blue	0.0843093
ENSG00000148248	SURF4	surfeit 4 [Source:HGNC Symbol	ENSG00000148248	blue	0.000878763
ENSG00000148334	PTGES2	prostaglandin E synthase 2 [Source:HGNC Symbol	ENSG00000148334	blue	0.0112036
ENSG00000148346	LCN2	lipocalin 2 [Source:HGNC Symbol	ENSG00000148346	magenta	0.243826
ENSG00000148719	DNAJB12	DnaJ heat shock protein family (Hsp40) member B12 [Source:HGNC Symbol	ENSG00000148719	blue	0.0178168
ENSG00000149131	SERPING1	serpin family G member 1 [Source:HGNC Symbol	ENSG00000149131	blue	0.152325
ENSG00000149532	CPSF7	cleavage and polyadenylation specific factor 7 [Source:HGNC Symbol	ENSG00000149532	blue	0.0630589
ENSG00000150048	CLEC1A	C-type lectin domain family 1 member A [Source:HGNC Symbol	ENSG00000150048	blue	0.0570731
ENSG00000150401	DCUN1D2	defective in cullin neddylation 1 domain containing 2 [Source:HGNC Symbol	ENSG00000150401	blue	0.0175131
ENSG00000150455	TIRAP	TIR domain containing adaptor protein [Source:HGNC Symbol	ENSG00000150455	yellow	0.0150043
ENSG00000150961	SEC24D	SEC24 homolog D, COPII coat complex component [Source:HGNC Symbol	ENSG00000150961	blue	0.34765
ENSG00000151692	RNF144A	ring finger protein 144A [Source:HGNC Symbol	ENSG00000151692	blue	0.00389882
ENSG00000151948	GLT1D1	glycosyltransferase 1 domain containing 1 [Source:HGNC Symbol	ENSG00000151948	blue	0.0161104
ENSG00000151952	TMEM132D	transmembrane protein 132D [Source:HGNC Symbol	ENSG00000151952	blue	0.429044
ENSG00000152133	GPATCH11	G-patch domain containing 11 [Source:HGNC Symbol	ENSG00000152133	blue	0.222727
ENSG00000152242	C18orf25	chromosome 18 open reading frame 25 [Source:HGNC Symbol	ENSG00000152242	blue	0.0142853
ENSG00000152558	TMEM123	transmembrane protein 123 [Source:HGNC Symbol	ENSG00000152558	blue	0.0397405
ENSG00000152689	RASGRP3	RAS guanyl releasing protein 3 [Source:HGNC Symbol	ENSG00000152689	blue	0.0327575
ENSG00000152766	ANKRD22	ankyrin repeat domain 22 [Source:HGNC Symbol	ENSG00000152766	blue	0.229448
ENSG00000152778	IFIT5	interferon induced protein with tetratricopeptide repeats 5 [Source:HGNC Symbol	ENSG00000152778	blue	0.0129254
ENSG00000152818	UTRN	utrophin [Source:HGNC Symbol	ENSG00000152818	blue	0.07267
ENSG00000153531	ADPRHL1	ADP-ribosylhydrolase like 1 [Source:HGNC Symbol	ENSG00000153531	blue	0.126039
ENSG00000154305	MIA3	MIA SH3 domain ER export factor 3 [Source:HGNC Symbol	ENSG00000154305	blue	0.00681203
ENSG00000154310	TNIK	TRAF2 and NCK interacting kinase [Source:HGNC Symbol	ENSG00000154310	blue	0.08814
ENSG00000154451	GBP5	guanylate binding protein 5 [Source:HGNC Symbol	ENSG00000154451	blue	0.0493116
ENSG00000155158	TTC39B	tetratricopeptide repeat domain 39B [Source:HGNC Symbol	ENSG00000155158	blue	5.55e-05
ENSG00000155229	MMS19	MMS19 homolog, cytosolic iron-sulfur assembly component [Source:HGNC Symbol	ENSG00000155229	blue	0.213332
ENSG00000155287	SLC25A28	solute carrier family 25 member 28 [Source:HGNC Symbol	ENSG00000155287	blue	0.0206103
ENSG00000155313	USP25	ubiquitin specific peptidase 25 [Source:HGNC Symbol	ENSG00000155313	blue	0.0132437
ENSG00000155363	MOV10	Mov10 RISC complex RNA helicase [Source:HGNC Symbol	ENSG00000155363	blue	0.00197944
ENSG00000155561	NUP205	nucleoporin 205 [Source:HGNC Symbol	ENSG00000155561	blue	0.022722
ENSG00000155629	PIK3AP1	phosphoinositide-3-kinase adaptor protein 1 [Source:HGNC Symbol	ENSG00000155629	blue	0.00872319
ENSG00000156500	PABIR3	PABIR family member 3 [Source:HGNC Symbol	ENSG00000156500	blue	0.0152172
ENSG00000156515	HK1	hexokinase 1 [Source:HGNC Symbol	ENSG00000156515	blue	0.285516
ENSG00000156587	UBE2L6	ubiquitin conjugating enzyme E2 L6 [Source:HGNC Symbol	ENSG00000156587	blue	0.147479
ENSG00000156711	MAPK13	mitogen-activated protein kinase 13 [Source:HGNC Symbol	ENSG00000156711	yellow	0.179541
ENSG00000156873	PHKG2	phosphorylase kinase catalytic subunit gamma 2 [Source:HGNC Symbol	ENSG00000156873	blue	0.774756
ENSG00000157152	SYN2	synapsin II [Source:HGNC Symbol	ENSG00000157152	blue	0.0663421
ENSG00000157601	MX1	MX dynamin like GTPase 1 [Source:HGNC Symbol	ENSG00000157601	blue	0.0825812
ENSG00000157693	TMEM268	transmembrane protein 268 [Source:HGNC Symbol	ENSG00000157693	blue	0.0944952
ENSG00000157800	SLC37A3	solute carrier family 37 member 3 [Source:HGNC Symbol	ENSG00000157800	blue	0.162291
ENSG00000157827	FMNL2	formin like 2 [Source:HGNC Symbol	ENSG00000157827	yellow	0.0316651
ENSG00000157870	PRXL2B	peroxiredoxin like 2B [Source:HGNC Symbol	ENSG00000157870	blue	0.0212066
ENSG00000160326	SLC2A6	solute carrier family 2 member 6 [Source:HGNC Symbol	ENSG00000160326	magenta	0.0141597
ENSG00000160703	NLRX1	NLR family member X1 [Source:HGNC Symbol	ENSG00000160703	blue	0.340802
ENSG00000160710	ADAR	adenosine deaminase RNA specific [Source:HGNC Symbol	ENSG00000160710	blue	0.0952299
ENSG00000160716	CHRNB2	cholinergic receptor nicotinic beta 2 subunit [Source:HGNC Symbol	ENSG00000160716	blue	0.0942262
ENSG00000160932	LY6E	lymphocyte antigen 6 family member E [Source:HGNC Symbol	ENSG00000160932	blue	0.00832095
ENSG00000161179	YDJC	YdjC chitooligosaccharide deacetylase homolog [Source:HGNC Symbol	ENSG00000161179	blue	0.0112865
ENSG00000161203	AP2M1	adaptor related protein complex 2 subunit mu 1 [Source:HGNC Symbol	ENSG00000161203	blue	0.523446
ENSG00000161692	DBF4B	DBF4 zinc finger B [Source:HGNC Symbol	ENSG00000161692	blue	0.0674044
ENSG00000162076	FLYWCH2	FLYWCH family member 2 [Source:HGNC Symbol	ENSG00000162076	blue	0.0880369
ENSG00000162413	KLHL21	kelch like family member 21 [Source:HGNC Symbol	ENSG00000162413	blue	0.0282317
ENSG00000162444	RBP7	retinol binding protein 7 [Source:HGNC Symbol	ENSG00000162444	blue	0.0459219
ENSG00000162645	GBP2	guanylate binding protein 2 [Source:HGNC Symbol	ENSG00000162645	blue	0.0906404
ENSG00000162654	GBP4	guanylate binding protein 4 [Source:HGNC Symbol	ENSG00000162654	blue	0.123356
ENSG00000162714	ZNF496	zinc finger protein 496 [Source:HGNC Symbol	ENSG00000162714	blue	0.00943319
ENSG00000162772	ATF3	activating transcription factor 3 [Source:HGNC Symbol	ENSG00000162772	blue	0.000222332
ENSG00000162946	DISC1	DISC1 scaffold protein [Source:HGNC Symbol	ENSG00000162946	yellow	0.0616344
ENSG00000163050	COQ8A	coenzyme Q8A [Source:HGNC Symbol	ENSG00000163050	blue	0.00280892
ENSG00000163466	ARPC2	actin related protein 2/3 complex subunit 2 [Source:HGNC Symbol	ENSG00000163466	blue	0.130292
ENSG00000163512	AZI2	5-azacytidine induced 2 [Source:HGNC Symbol	ENSG00000163512	blue	0.395913
ENSG00000163565	IFI16	interferon gamma inducible protein 16 [Source:HGNC Symbol	ENSG00000163565	blue	0.169347
ENSG00000163635	ATXN7	ataxin 7 [Source:HGNC Symbol	ENSG00000163635	blue	0.0606968
ENSG00000163644	PPM1K	protein phosphatase, Mg2+/Mn2+ dependent 1K [Source:HGNC Symbol	ENSG00000163644	blue	0.00272005
ENSG00000163746	PLSCR2	phospholipid scramblase 2 [Source:HGNC Symbol	ENSG00000163746	blue	0.0538672
ENSG00000163812	ZDHHC3	zinc finger DHHC-type palmitoyltransferase 3 [Source:HGNC Symbol	ENSG00000163812	blue	0.0207489
ENSG00000163840	DTX3L	deltex E3 ubiquitin ligase 3L [Source:HGNC Symbol	ENSG00000163840	blue	0.129011
ENSG00000163902	RPN1	ribophorin I [Source:HGNC Symbol	ENSG00000163902	blue	0.00120691
ENSG00000164002	EXO5	exonuclease 5 [Source:HGNC Symbol	ENSG00000164002	blue	0.961254
ENSG00000164054	SHISA5	shisa family member 5 [Source:HGNC Symbol	ENSG00000164054	blue	0.229943
ENSG00000164308	ERAP2	endoplasmic reticulum aminopeptidase 2 [Source:HGNC Symbol	ENSG00000164308	blue	0.5048
ENSG00000164430	CGAS	cyclic GMP-AMP synthase [Source:HGNC Symbol	ENSG00000164430	blue	0.417238
ENSG00000164970	FAM219A	family with sequence similarity 219 member A [Source:HGNC Symbol	ENSG00000164970	blue	0.220588
ENSG00000165185	KIAA1958	KIAA1958 [Source:HGNC Symbol	ENSG00000165185	blue	0.00970401
ENSG00000165264	NDUFB6	NADH:ubiquinone oxidoreductase subunit B6 [Source:HGNC Symbol	ENSG00000165264	blue	0.0058235
ENSG00000165699	TSC1	TSC complex subunit 1 [Source:HGNC Symbol	ENSG00000165699	blue	0.00758166
ENSG00000165943	MOAP1	modulator of apoptosis 1 [Source:HGNC Symbol	ENSG00000165943	blue	0.0275106
ENSG00000166002	SMCO4	single-pass membrane protein with coiled-coil domains 4 [Source:HGNC Symbol	ENSG00000166002	blue	0.219013
ENSG00000166257	SCN3B	sodium voltage-gated channel beta subunit 3 [Source:HGNC Symbol	ENSG00000166257	blue	0.00443101
ENSG00000166716	ZNF592	zinc finger protein 592 [Source:HGNC Symbol	ENSG00000166716	blue	0.0205285
ENSG00000166750	SLFN5	schlafen family member 5 [Source:HGNC Symbol	ENSG00000166750	blue	0.0660098
ENSG00000166801	FAM111A	FAM111 trypsin like peptidase A [Source:HGNC Symbol	ENSG00000166801	blue	0.132313
ENSG00000166825	ANPEP	alanyl aminopeptidase, membrane [Source:HGNC Symbol	ENSG00000166825	yellow	0.00204682
ENSG00000166949	SMAD3	SMAD family member 3 [Source:HGNC Symbol	ENSG00000166949	blue	0.177215
ENSG00000166987	MBD6	methyl-CpG binding domain protein 6 [Source:HGNC Symbol	ENSG00000166987	blue	0.245495
ENSG00000167461	RAB8A	RAB8A, member RAS oncogene family [Source:HGNC Symbol	ENSG00000167461	blue	0.106845
ENSG00000168016	TRANK1	tetratricopeptide repeat and ankyrin repeat containing 1 [Source:HGNC Symbol	ENSG00000168016	blue	0.0172349
ENSG00000168026	TTC21A	tetratricopeptide repeat domain 21A [Source:HGNC Symbol	ENSG00000168026	blue	0.105264
ENSG00000168062	BATF2	basic leucine zipper ATF-like transcription factor 2 [Source:HGNC Symbol	ENSG00000168062	blue	0.201224
ENSG00000168118	RAB4A	RAB4A, member RAS oncogene family [Source:HGNC Symbol	ENSG00000168118	blue	0.00181562
ENSG00000168291	PDHB	pyruvate dehydrogenase E1 subunit beta [Source:HGNC Symbol	ENSG00000168291	blue	0.0212521
ENSG00000168297	PXK	PX domain containing serine/threonine kinase like [Source:HGNC Symbol	ENSG00000168297	blue	0.0699356
ENSG00000168310	IRF2	interferon regulatory factor 2 [Source:HGNC Symbol	ENSG00000168310	blue	0.0369074
ENSG00000168899	VAMP5	vesicle associated membrane protein 5 [Source:HGNC Symbol	ENSG00000168899	blue	0.669196
ENSG00000168916	ZNF608	zinc finger protein 608 [Source:HGNC Symbol	ENSG00000168916	blue	0.174369
ENSG00000168961	LGALS9	galectin 9 [Source:HGNC Symbol	ENSG00000168961	blue	0.0994741
ENSG00000169871	TRIM56	tripartite motif containing 56 [Source:HGNC Symbol	ENSG00000169871	blue	0.00475832
ENSG00000170004	CHD3	chromodomain helicase DNA binding protein 3 [Source:HGNC Symbol	ENSG00000170004	yellow	0.0265242
ENSG00000170027	YWHAG	tyrosine 3-monooxygenase/tryptophan 5-monooxygenase activation protein gamma [Source:HGNC Symbol	ENSG00000170027	blue	0.00143638
ENSG00000170175	CHRNB1	cholinergic receptor nicotinic beta 1 subunit [Source:HGNC Symbol	ENSG00000170175	blue	0.274889
ENSG00000170190	SLC16A5	solute carrier family 16 member 5 [Source:HGNC Symbol	ENSG00000170190	yellow	0.207142
ENSG00000170322	NFRKB	nuclear factor related to kappaB binding protein [Source:HGNC Symbol	ENSG00000170322	blue	0.000440446
ENSG00000170579	DLGAP1	DLG associated protein 1 [Source:HGNC Symbol	ENSG00000170579	yellow	0.0461447
ENSG00000170581	STAT2	signal transducer and activator of transcription 2 [Source:HGNC Symbol	ENSG00000170581	blue	0.263882
ENSG00000171132	PRKCE	protein kinase C epsilon [Source:HGNC Symbol	ENSG00000171132	blue	0.0337294
ENSG00000171206	TRIM8	tripartite motif containing 8 [Source:HGNC Symbol	ENSG00000171206	blue	0.147537
ENSG00000171608	PIK3CD	phosphatidylinositol-4,5-bisphosphate 3-kinase catalytic subunit delta [Source:HGNC Symbol	ENSG00000171608	yellow	0.250599
ENSG00000171791	BCL2	BCL2 apoptosis regulator [Source:HGNC Symbol	ENSG00000171791	yellow	0.0503345
ENSG00000171943	SRGAP2C	SLIT-ROBO Rho GTPase activating protein 2C [Source:HGNC Symbol	ENSG00000171943	blue	0.0319594
ENSG00000172159	FRMD3	FERM domain containing 3 [Source:HGNC Symbol	ENSG00000172159	blue	0.013477
ENSG00000172164	SNTB1	syntrophin beta 1 [Source:HGNC Symbol	ENSG00000172164	blue	0.201674
ENSG00000172167	MTBP	MDM2 binding protein [Source:HGNC Symbol	ENSG00000172167	blue	0.152668
ENSG00000172183	ISG20	interferon stimulated exonuclease gene 20 [Source:HGNC Symbol	ENSG00000172183	blue	0.952424
ENSG00000172232	AZU1	azurocidin 1 [Source:HGNC Symbol	ENSG00000172232	magenta	0.254946
ENSG00000172403	SYNPO2	synaptopodin 2 [Source:HGNC Symbol	ENSG00000172403	blue	0.100143
ENSG00000172426	RSPH9	radial spoke head component 9 [Source:HGNC Symbol	ENSG00000172426	blue	0.0143882
ENSG00000172432	GTPBP2	GTP binding protein 2 [Source:HGNC Symbol	ENSG00000172432	blue	0.042951
ENSG00000172493	AFF1	AF4/FMR2 family member 1 [Source:HGNC Symbol	ENSG00000172493	blue	0.0091672
ENSG00000173011	TADA2B	transcriptional adaptor 2B [Source:HGNC Symbol	ENSG00000173011	blue	0.917163
ENSG00000173193	PARP14	poly(ADP-ribose) polymerase family member 14 [Source:HGNC Symbol	ENSG00000173193	blue	0.0063793
ENSG00000173198	CYSLTR1	cysteinyl leukotriene receptor 1 [Source:HGNC Symbol	ENSG00000173198	blue	0.069384
ENSG00000173239	LIPM	lipase family member M [Source:HGNC Symbol	ENSG00000173239	blue	0.137042
ENSG00000173372	C1QA	complement C1q A chain [Source:HGNC Symbol	ENSG00000173372	magenta	0.219328
ENSG00000173638	SLC19A1	solute carrier family 19 member 1 [Source:HGNC Symbol	ENSG00000173638	blue	0.951362
ENSG00000173692	PSMD1	proteasome 26S subunit, non-ATPase 1 [Source:HGNC Symbol	ENSG00000173692	blue	0.136039
ENSG00000173706	HEG1	heart development protein with EGF like domains 1 [Source:HGNC Symbol	ENSG00000173706	magenta	0.138029
ENSG00000173786	CNP	2',3'-cyclic nucleotide 3' phosphodiesterase [Source:HGNC Symbol	ENSG00000173786	blue	0.0542279
ENSG00000173818	ENDOV	endonuclease V [Source:HGNC Symbol	ENSG00000173818	blue	0.0289161
ENSG00000173821	RNF213	ring finger protein 213 [Source:HGNC Symbol	ENSG00000173821	blue	0.0219792
ENSG00000174151	CYB561D1	cytochrome b561 family member D1 [Source:HGNC Symbol	ENSG00000174151	yellow	0.264523
ENSG00000175182	FAM131A	family with sequence similarity 131 member A [Source:HGNC Symbol	ENSG00000175182	blue	0.00512074
ENSG00000175274	TP53I11	tumor protein p53 inducible protein 11 [Source:HGNC Symbol	ENSG00000175274	blue	0.0106279
ENSG00000175550	DRAP1	DR1 associated protein 1 [Source:HGNC Symbol	ENSG00000175550	blue	0.210173
ENSG00000175606	TMEM70	transmembrane protein 70 [Source:HGNC Symbol	ENSG00000175606	blue	0.406639
ENSG00000175662	TOM1L2	target of myb1 like 2 membrane trafficking protein [Source:HGNC Symbol	ENSG00000175662	blue	0.311223
ENSG00000175727	MLXIP	MLX interacting protein [Source:HGNC Symbol	ENSG00000175727	blue	0.00127823
ENSG00000176454	LPCAT4	lysophosphatidylcholine acyltransferase 4 [Source:HGNC Symbol	ENSG00000176454	blue	0.00174598
ENSG00000176783	RUFY1	RUN and FYVE domain containing 1 [Source:HGNC Symbol	ENSG00000176783	blue	0.126549
ENSG00000176946	THAP4	THAP domain containing 4 [Source:HGNC Symbol	ENSG00000176946	blue	0.138612
ENSG00000177169	ULK1	unc-51 like autophagy activating kinase 1 [Source:HGNC Symbol	ENSG00000177169	blue	0.557771
ENSG00000177294	FBXO39	F-box protein 39 [Source:HGNC Symbol	ENSG00000177294	blue	0.0159555
ENSG00000177302	TOP3A	DNA topoisomerase III alpha [Source:HGNC Symbol	ENSG00000177302	yellow	0.548471
ENSG00000177409	SAMD9L	sterile alpha motif domain containing 9 like [Source:HGNC Symbol	ENSG00000177409	blue	0.0246507
ENSG00000177666	PNPLA2	patatin like phospholipase domain containing 2 [Source:HGNC Symbol	ENSG00000177666	blue	0.159322
ENSG00000177721	ANXA2R	annexin A2 receptor [Source:HGNC Symbol	ENSG00000177721	blue	0.227856
ENSG00000177731	FLII	FLII actin remodeling protein [Source:HGNC Symbol	ENSG00000177731	blue	0.250382
ENSG00000177989	ODF3B	outer dense fiber of sperm tails 3B [Source:HGNC Symbol	ENSG00000177989	yellow	0.00171839
ENSG00000178685	PARP10	poly(ADP-ribose) polymerase family member 10 [Source:HGNC Symbol	ENSG00000178685	blue	0.00253282
ENSG00000178741	COX5A	cytochrome c oxidase subunit 5A [Source:HGNC Symbol	ENSG00000178741	blue	0.189415
ENSG00000179044	EXOC3L1	exocyst complex component 3 like 1 [Source:HGNC Symbol	ENSG00000179044	blue	0.000599281
ENSG00000179583	CIITA	class II major histocompatibility complex transactivator [Source:HGNC Symbol	ENSG00000179583	blue	0.451741
ENSG00000180628	PCGF5	polycomb group ring finger 5 [Source:HGNC Symbol	ENSG00000180628	blue	0.042608
ENSG00000181026	AEN	apoptosis enhancing nuclease [Source:HGNC Symbol	ENSG00000181026	magenta	0.023621
ENSG00000181027	FKRP	fukutin related protein [Source:HGNC Symbol	ENSG00000181027	blue	0.191377
ENSG00000181220	ZNF746	zinc finger protein 746 [Source:HGNC Symbol	ENSG00000181220	yellow	0.184296
ENSG00000181381	DDX60L	DExD/H-box 60 like [Source:HGNC Symbol	ENSG00000181381	blue	0.0376953
ENSG00000182158	CREB3L2	cAMP responsive element binding protein 3 like 2 [Source:HGNC Symbol	ENSG00000182158	blue	0.0403698
ENSG00000182179	UBA7	ubiquitin like modifier activating enzyme 7 [Source:HGNC Symbol	ENSG00000182179	blue	0.00476866
ENSG00000182446	NPLOC4	NPL4 homolog, ubiquitin recognition factor [Source:HGNC Symbol	ENSG00000182446	blue	0.167125
ENSG00000182685	BRICD5	BRICHOS domain containing 5 [Source:HGNC Symbol	ENSG00000182685	blue	0.664278
ENSG00000182718	ANXA2	annexin A2 [Source:HGNC Symbol	ENSG00000182718	magenta	0.0244852
ENSG00000183258	DDX41	DEAD-box helicase 41 [Source:HGNC Symbol	ENSG00000183258	blue	0.504185
ENSG00000183347	GBP6	guanylate binding protein family member 6 [Source:HGNC Symbol	ENSG00000183347	blue	0.024538
ENSG00000183486	MX2	MX dynamin like GTPase 2 [Source:HGNC Symbol	ENSG00000183486	blue	0.204732
ENSG00000183576	SETD3	SET domain containing 3, actin histidine methyltransferase [Source:HGNC Symbol	ENSG00000183576	blue	0.759
ENSG00000183741	CBX6	chromobox 6 [Source:HGNC Symbol	ENSG00000183741	blue	0.00065203
ENSG00000183943	PRKX	protein kinase X-linked [Source:HGNC Symbol	ENSG00000183943	blue	0.0106591
ENSG00000184207	PGP	phosphoglycolate phosphatase [Source:HGNC Symbol	ENSG00000184207	blue	0.00586229
ENSG00000184216	IRAK1	interleukin 1 receptor associated kinase 1 [Source:HGNC Symbol	ENSG00000184216	blue	0.742556
ENSG00000184489	PTP4A3	protein tyrosine phosphatase 4A3 [Source:HGNC Symbol	ENSG00000184489	yellow	0.0597175
ENSG00000184898	RBM43	RNA binding motif protein 43 [Source:HGNC Symbol	ENSG00000184898	blue	0.0117267
ENSG00000184979	USP18	ubiquitin specific peptidase 18 [Source:HGNC Symbol	ENSG00000184979	blue	0.0587191
ENSG00000185024	BRF1	BRF1 RNA polymerase III transcription initiation factor subunit [Source:HGNC Symbol	ENSG00000185024	blue	0.156882
ENSG00000185404	SP140L	SP140 nuclear body protein like [Source:HGNC Symbol	ENSG00000185404	blue	0.103052
ENSG00000185507	IRF7	interferon regulatory factor 7 [Source:HGNC Symbol	ENSG00000185507	blue	0.0417681
ENSG00000185722	ANKFY1	ankyrin repeat and FYVE domain containing 1 [Source:HGNC Symbol	ENSG00000185722	blue	0.0536338
ENSG00000185880	TRIM69	tripartite motif containing 69 [Source:HGNC Symbol	ENSG00000185880	blue	0.079105
ENSG00000185896	LAMP1	lysosomal associated membrane protein 1 [Source:HGNC Symbol	ENSG00000185896	blue	0.00370058
ENSG00000186001	LRCH3	leucine rich repeats and calponin homology domain containing 3 [Source:HGNC Symbol	ENSG00000186001	yellow	0.0699747
ENSG00000186063	AIDA	axin interactor, dorsalization associated [Source:HGNC Symbol	ENSG00000186063	blue	0.190229
ENSG00000186111	PIP5K1C	phosphatidylinositol-4-phosphate 5-kinase type 1 gamma [Source:HGNC Symbol	ENSG00000186111	blue	0.0406803
ENSG00000186350	RXRA	retinoid X receptor alpha [Source:HGNC Symbol	ENSG00000186350	blue	0.0133846
ENSG00000186470	BTN3A2	butyrophilin subfamily 3 member A2 [Source:HGNC Symbol	ENSG00000186470	blue	0.141156
ENSG00000186716	BCR	BCR activator of RhoGEF and GTPase [Source:HGNC Symbol	ENSG00000186716	blue	0.230988
ENSG00000187231	SESTD1	SEC14 and spectrin domain containing 1 [Source:HGNC Symbol	ENSG00000187231	blue	0.0085105
ENSG00000187260	WDR86	WD repeat domain 86 [Source:HGNC Symbol	ENSG00000187260	blue	0.0733468
ENSG00000187608	ISG15	ISG15 ubiquitin like modifier [Source:HGNC Symbol	ENSG00000187608	blue	0.00279202
ENSG00000187741	FANCA	FA complementation group A [Source:HGNC Symbol	ENSG00000187741	blue	0.147816
ENSG00000188026	RILPL1	Rab interacting lysosomal protein like 1 [Source:HGNC Symbol	ENSG00000188026	blue	0.180767
ENSG00000188157	AGRN	agrin [Source:HGNC Symbol	ENSG00000188157	blue	0.00462753
ENSG00000188290	HES4	hes family bHLH transcription factor 4 [Source:HGNC Symbol	ENSG00000188290	blue	0.00314586
ENSG00000188313	PLSCR1	phospholipid scramblase 1 [Source:HGNC Symbol	ENSG00000188313	blue	0.0862082
ENSG00000196116	TDRD7	tudor domain containing 7 [Source:HGNC Symbol	ENSG00000196116	blue	0.0317299
ENSG00000196123	KIAA0895L	KIAA0895 like [Source:HGNC Symbol	ENSG00000196123	blue	0.0269657
ENSG00000196141	SPATS2L	spermatogenesis associated serine rich 2 like [Source:HGNC Symbol	ENSG00000196141	blue	0.0210254
ENSG00000196358	NTNG2	netrin G2 [Source:HGNC Symbol	ENSG00000196358	blue	0.000702129
ENSG00000196405	EVL	Enah/Vasp-like [Source:HGNC Symbol	ENSG00000196405	blue	0.00104964
ENSG00000196418	ZNF124	zinc finger protein 124 [Source:HGNC Symbol	ENSG00000196418	blue	0.225292
ENSG00000196504	PRPF40A	pre-mRNA processing factor 40 homolog A [Source:HGNC Symbol	ENSG00000196504	blue	0.0336348
ENSG00000196562	SULF2	sulfatase 2 [Source:HGNC Symbol	ENSG00000196562	blue	0.0534545
ENSG00000196576	PLXNB2	plexin B2 [Source:HGNC Symbol	ENSG00000196576	magenta	0.0252049
ENSG00000196628	TCF4	transcription factor 4 [Source:HGNC Symbol	ENSG00000196628	blue	0.0581077
ENSG00000196684	HSH2D	hematopoietic SH2 domain containing [Source:HGNC Symbol	ENSG00000196684	blue	0.070237
ENSG00000196954	CASP4	caspase 4 [Source:HGNC Symbol	ENSG00000196954	blue	0.857422
ENSG00000197111	PCBP2	poly(rC) binding protein 2 [Source:HGNC Symbol	ENSG00000197111	blue	0.0728325
ENSG00000197448	GSTK1	glutathione S-transferase kappa 1 [Source:HGNC Symbol	ENSG00000197448	blue	0.17512
ENSG00000197561	ELANE	elastase, neutrophil expressed [Source:HGNC Symbol	ENSG00000197561	magenta	0.0749947
ENSG00000197562	RAB40C	RAB40C, member RAS oncogene family [Source:HGNC Symbol	ENSG00000197562	blue	0.0340572
ENSG00000197943	PLCG2	phospholipase C gamma 2 [Source:HGNC Symbol	ENSG00000197943	yellow	0.135061
ENSG00000198087	CD2AP	CD2 associated protein [Source:HGNC Symbol	ENSG00000198087	blue	0.0148095
ENSG00000198133	TMEM229B	transmembrane protein 229B [Source:HGNC Symbol	ENSG00000198133	blue	0.0526075
ENSG00000198223	CSF2RA	colony stimulating factor 2 receptor subunit alpha [Source:HGNC Symbol	ENSG00000198223	blue	0.00248219
ENSG00000198231	DDX42	DEAD-box helicase 42 [Source:HGNC Symbol	ENSG00000198231	blue	0.0917518
ENSG00000198604	BAZ1A	bromodomain adjacent to zinc finger domain 1A [Source:HGNC Symbol	ENSG00000198604	blue	0.02379
ENSG00000198673	TAFA2	TAFA chemokine like family member 2 [Source:HGNC Symbol	ENSG00000198673	yellow	0.00326596
ENSG00000198925	ATG9A	autophagy related 9A [Source:HGNC Symbol	ENSG00000198925	blue	0.035922
ENSG00000198937	CCDC167	coiled-coil domain containing 167 [Source:HGNC Symbol	ENSG00000198937	blue	0.0302017
ENSG00000198948	MFAP3L	microfibril associated protein 3 like [Source:HGNC Symbol	ENSG00000198948	yellow	0.328382
ENSG00000204217	BMPR2	bone morphogenetic protein receptor type 2 [Source:HGNC Symbol	ENSG00000204217	blue	0.0230045
ENSG00000204227	RING1	ring finger protein 1 [Source:HGNC Symbol	ENSG00000204227	blue	0.0593947
ENSG00000204264	PSMB8	proteasome 20S subunit beta 8 [Source:HGNC Symbol	ENSG00000204264	blue	0.220075
ENSG00000204287	HLA-DRA	major histocompatibility complex, class II, DR alpha [Source:HGNC Symbol	ENSG00000204287	blue	0.945451
ENSG00000204397	CARD16	caspase recruitment domain family member 16 [Source:HGNC Symbol	ENSG00000204397	blue	0.315427
ENSG00000204592	HLA-E	major histocompatibility complex, class I, E [Source:HGNC Symbol	ENSG00000204592	blue	0.089667
ENSG00000204681	GABBR1	gamma-aminobutyric acid type B receptor subunit 1 [Source:HGNC Symbol	ENSG00000204681	blue	0.397004
ENSG00000204859	ZBTB48	zinc finger and BTB domain containing 48 [Source:HGNC Symbol	ENSG00000204859	yellow	0.337319
ENSG00000205339	IPO7	importin 7 [Source:HGNC Symbol	ENSG00000205339	yellow	0.0613545
ENSG00000205413	SAMD9	sterile alpha motif domain containing 9 [Source:HGNC Symbol	ENSG00000205413	blue	0.0679433
ENSG00000205730	ITPRIPL2	ITPRIP like 2 [Source:HGNC Symbol	ENSG00000205730	blue	0.598164
ENSG00000213923	CSNK1E	casein kinase 1 epsilon [Source:HGNC Symbol	ENSG00000213923	yellow	0.114184
ENSG00000213928	IRF9	interferon regulatory factor 9 [Source:HGNC Symbol	ENSG00000213928	blue	0.268299
ENSG00000214226	C17orf67	chromosome 17 open reading frame 67 [Source:HGNC Symbol	ENSG00000214226	blue	0.256865
ENSG00000214872	SMTNL1	smoothelin like 1 [Source:HGNC Symbol	ENSG00000214872	blue	0.000779991
ENSG00000221963	APOL6	apolipoprotein L6 [Source:HGNC Symbol	ENSG00000221963	blue	0.082908
ENSG00000223865	HLA-DPB1	major histocompatibility complex, class II, DP beta 1 [Source:HGNC Symbol	ENSG00000223865	magenta	0.0352843
ENSG00000224940	PRRT4	proline rich transmembrane protein 4 [Source:HGNC Symbol	ENSG00000224940	blue	0.124753
ENSG00000226321	CROCC2	ciliary rootlet coiled-coil, rootletin family member 2 [Source:HGNC Symbol	ENSG00000226321	magenta	0.0656278
ENSG00000228696	ARL17B	ADP ribosylation factor like GTPase 17B [Source:HGNC Symbol	ENSG00000228696	blue	0.0071564
ENSG00000230054	TEX53	testis expressed 53 [Source:HGNC Symbol	ENSG00000230054	blue	0.0635783
ENSG00000231389	HLA-DPA1	major histocompatibility complex, class II, DP alpha 1 [Source:HGNC Symbol	ENSG00000231389	magenta	0.0351805
ENSG00000234127	TRIM26	tripartite motif containing 26 [Source:HGNC Symbol	ENSG00000234127	blue	0.119045
ENSG00000239713	APOBEC3G	apolipoprotein B mRNA editing enzyme catalytic subunit 3G [Source:HGNC Symbol	ENSG00000239713	blue	0.00129326
ENSG00000239920	None	novel transcript	ENSG00000239920	blue	0.00418231
ENSG00000240065	PSMB9	proteasome 20S subunit beta 9 [Source:HGNC Symbol	ENSG00000240065	blue	0.0577314
ENSG00000242574	HLA-DMB	major histocompatibility complex, class II, DM beta [Source:HGNC Symbol	ENSG00000242574	blue	0.502947
ENSG00000245848	CEBPA	CCAAT enhancer binding protein alpha [Source:HGNC Symbol	ENSG00000245848	blue	0.218575
ENSG00000248712	CCDC153	coiled-coil domain containing 153 [Source:HGNC Symbol	ENSG00000248712	blue	0.0173117
ENSG00000250264	None	novel protein, TAP2-HLA-DOB readthrough	ENSG00000250264	blue	0.305854
ENSG00000254999	BRK1	BRICK1 subunit of SCAR/WAVE actin nucleating complex [Source:HGNC Symbol	ENSG00000254999	blue	0.0204769
ENSG00000266028	SRGAP2	SLIT-ROBO Rho GTPase activating protein 2 [Source:HGNC Symbol	ENSG00000266028	blue	0.0222694
ENSG00000268797	None	novel protein	ENSG00000268797	blue	0.00100215
ENSG00000269720	CCDC194	coiled-coil domain containing 194 [Source:HGNC Symbol	ENSG00000269720	blue	0.0121718
ENSG00000273734	None	novel protein, readthrough between OAZ1 and SPPL2B	ENSG00000273734	blue	0.129096
ENSG00000274180	NATD1	N-acetyltransferase domain containing 1 [Source:HGNC Symbol	ENSG00000274180	yellow	0.0400298
ENSG00000284194	SCO2	synthesis of cytochrome C oxidase 2 [Source:HGNC Symbol	ENSG00000284194	blue	0.00166657
ENSG00000286239	None	novel protein, WDFY1-AP1S3 readthrough	ENSG00000286239	blue	0.0112976

## Sheet: Eosinophils
Table S8. WGCNA co-expression modules
initial_alias	name	description	ENSG ID	Module	P value
ENSG00000002549	LAP3	leucine aminopeptidase 3 [Source:HGNC Symbol	ENSG00000002549	black	0.00350166
ENSG00000003400	CASP10	caspase 10 [Source:HGNC Symbol	ENSG00000003400	black	0.00381308
ENSG00000008283	CYB561	cytochrome b561 [Source:HGNC Symbol	ENSG00000008283	black	0.0138835
ENSG00000010818	HIVEP2	HIVEP zinc finger 2 [Source:HGNC Symbol	ENSG00000010818	magenta	7.13e-05
ENSG00000017483	SLC38A5	solute carrier family 38 member 5 [Source:HGNC Symbol	ENSG00000017483	black	0.00360903
ENSG00000025708	TYMP	thymidine phosphorylase [Source:HGNC Symbol	ENSG00000025708	black	0.0021736
ENSG00000055332	EIF2AK2	eukaryotic translation initiation factor 2 alpha kinase 2 [Source:HGNC Symbol	ENSG00000055332	black	0.000349424
ENSG00000059378	PARP12	poly(ADP-ribose) polymerase family member 12 [Source:HGNC Symbol	ENSG00000059378	black	2.2e-05
ENSG00000061938	TNK2	tyrosine kinase non receptor 2 [Source:HGNC Symbol	ENSG00000061938	black	0.00345123
ENSG00000067066	SP100	SP100 nuclear antigen [Source:HGNC Symbol	ENSG00000067066	black	0.00139477
ENSG00000068079	IFI35	interferon induced protein 35 [Source:HGNC Symbol	ENSG00000068079	black	0.00448376
ENSG00000071054	MAP4K4	mitogen-activated protein kinase kinase kinase kinase 4 [Source:HGNC Symbol	ENSG00000071054	magenta	0.424766
ENSG00000077044	DGKD	diacylglycerol kinase delta [Source:HGNC Symbol	ENSG00000077044	magenta	0.000467223
ENSG00000078081	LAMP3	lysosomal associated membrane protein 3 [Source:HGNC Symbol	ENSG00000078081	black	2.22e-05
ENSG00000086065	CHMP5	charged multivesicular body protein 5 [Source:HGNC Symbol	ENSG00000086065	black	0.000878982
ENSG00000087008	ACOX3	acyl-CoA oxidase 3, pristanoyl [Source:HGNC Symbol	ENSG00000087008	magenta	7.57e-05
ENSG00000087237	CETP	cholesteryl ester transfer protein [Source:HGNC Symbol	ENSG00000087237	black	0.000399957
ENSG00000088992	TESC	tescalcin [Source:HGNC Symbol	ENSG00000088992	magenta	0.0147645
ENSG00000089127	OAS1	2'-5'-oligoadenylate synthetase 1 [Source:HGNC Symbol	ENSG00000089127	black	2.69e-06
ENSG00000092010	PSME1	proteasome activator subunit 1 [Source:HGNC Symbol	ENSG00000092010	black	0.00749675
ENSG00000093134	VNN3P	vanin 3, pseudogene [Source:HGNC Symbol	ENSG00000093134	magenta	0.000706529
ENSG00000099725	PRKY	protein kinase Y-linked (pseudogene) [Source:HGNC Symbol	ENSG00000099725	magenta	0.000338063
ENSG00000099821	POLRMT	RNA polymerase mitochondrial [Source:HGNC Symbol	ENSG00000099821	black	0.00106719
ENSG00000100911	PSME2	proteasome activator subunit 2 [Source:HGNC Symbol	ENSG00000100911	black	0.00679533
ENSG00000100985	MMP9	matrix metallopeptidase 9 [Source:HGNC Symbol	ENSG00000100985	magenta	0.0318951
ENSG00000101347	SAMHD1	SAM and HD domain containing deoxynucleoside triphosphate triphosphohydrolase 1 [Source:HGNC Symbol	ENSG00000101347	black	0.000151297
ENSG00000101916	TLR8	toll like receptor 8 [Source:HGNC Symbol	ENSG00000101916	magenta	0.0434928
ENSG00000101986	ABCD1	ATP binding cassette subfamily D member 1 [Source:HGNC Symbol	ENSG00000101986	black	0.0466306
ENSG00000102445	RUBCNL	rubicon like autophagy enhancer [Source:HGNC Symbol	ENSG00000102445	magenta	0.010618
ENSG00000103196	CRISPLD2	cysteine rich secretory protein LCCL domain containing 2 [Source:HGNC Symbol	ENSG00000103196	magenta	0.0291656
ENSG00000103226	NOMO3	NODAL modulator 3 [Source:HGNC Symbol	ENSG00000103226	magenta	0.00093187
ENSG00000103313	MEFV	MEFV innate immuity regulator, pyrin [Source:HGNC Symbol	ENSG00000103313	magenta	0.0338651
ENSG00000103544	VPS35L	VPS35 endosomal protein sorting factor like [Source:HGNC Symbol	ENSG00000103544	black	0.00670319
ENSG00000104381	GDAP1	ganglioside induced differentiation associated protein 1 [Source:HGNC Symbol	ENSG00000104381	black	0.00410525
ENSG00000104972	LILRB1	leukocyte immunoglobulin like receptor B1 [Source:HGNC Symbol	ENSG00000104972	magenta	0.00516123
ENSG00000105373	NOP53	NOP53 ribosome biogenesis factor [Source:HGNC Symbol	ENSG00000105373	black	0.000208917
ENSG00000105639	JAK3	Janus kinase 3 [Source:HGNC Symbol	ENSG00000105639	magenta	0.0391856
ENSG00000105726	ATP13A1	ATPase 13A1 [Source:HGNC Symbol	ENSG00000105726	black	0.00293255
ENSG00000107745	MICU1	mitochondrial calcium uptake 1 [Source:HGNC Symbol	ENSG00000107745	magenta	0.0954813
ENSG00000108679	LGALS3BP	galectin 3 binding protein [Source:HGNC Symbol	ENSG00000108679	black	0.000673447
ENSG00000108771	DHX58	DExH-box helicase 58 [Source:HGNC Symbol	ENSG00000108771	black	0.000681549
ENSG00000109743	BST1	bone marrow stromal cell antigen 1 [Source:HGNC Symbol	ENSG00000109743	magenta	0.337119
ENSG00000110057	UNC93B1	unc-93 homolog B1, TLR signaling regulator [Source:HGNC Symbol	ENSG00000110057	black	0.000479209
ENSG00000110446	SLC15A3	solute carrier family 15 member 3 [Source:HGNC Symbol	ENSG00000110446	magenta	0.000268097
ENSG00000110497	AMBRA1	autophagy and beclin 1 regulator 1 [Source:HGNC Symbol	ENSG00000110497	black	2.15e-05
ENSG00000110799	VWF	von Willebrand factor [Source:HGNC Symbol	ENSG00000110799	magenta	0.000196558
ENSG00000111331	OAS3	2'-5'-oligoadenylate synthetase 3 [Source:HGNC Symbol	ENSG00000111331	black	2.93e-06
ENSG00000111335	OAS2	2'-5'-oligoadenylate synthetase 2 [Source:HGNC Symbol	ENSG00000111335	black	1.18e-05
ENSG00000112182	BACH2	BTB domain and CNC homolog 2 [Source:HGNC Symbol	ENSG00000112182	black	0.0934867
ENSG00000112299	VNN1	vanin 1 [Source:HGNC Symbol	ENSG00000112299	magenta	0.0442137
ENSG00000112303	VNN2	vanin 2 [Source:HGNC Symbol	ENSG00000112303	magenta	0.00517089
ENSG00000115267	IFIH1	interferon induced with helicase C domain 1 [Source:HGNC Symbol	ENSG00000115267	black	1.06e-06
ENSG00000115415	STAT1	signal transducer and activator of transcription 1 [Source:HGNC Symbol	ENSG00000115415	black	0.00580501
ENSG00000115828	QPCT	glutaminyl-peptide cyclotransferase [Source:HGNC Symbol	ENSG00000115828	magenta	0.320566
ENSG00000117226	GBP3	guanylate binding protein 3 [Source:HGNC Symbol	ENSG00000117226	black	9.16e-05
ENSG00000117228	GBP1	guanylate binding protein 1 [Source:HGNC Symbol	ENSG00000117228	black	0.000738877
ENSG00000119535	CSF3R	colony stimulating factor 3 receptor [Source:HGNC Symbol	ENSG00000119535	magenta	0.00111468
ENSG00000119655	NPC2	NPC intracellular cholesterol transporter 2 [Source:HGNC Symbol	ENSG00000119655	black	0.00102951
ENSG00000121060	TRIM25	tripartite motif containing 25 [Source:HGNC Symbol	ENSG00000121060	black	0.000637546
ENSG00000123992	DNPEP	aspartyl aminopeptidase [Source:HGNC Symbol	ENSG00000123992	black	0.0329792
ENSG00000124256	ZBP1	Z-DNA binding protein 1 [Source:HGNC Symbol	ENSG00000124256	black	0.0912118
ENSG00000124596	OARD1	O-acyl-ADP-ribose deacylase 1 [Source:HGNC Symbol	ENSG00000124596	black	0.237865
ENSG00000125148	MT2A	metallothionein 2A [Source:HGNC Symbol	ENSG00000125148	black	0.00060038
ENSG00000125843	AP5S1	adaptor related protein complex 5 subunit sigma 1 [Source:HGNC Symbol	ENSG00000125843	black	0.00017884
ENSG00000126709	IFI6	interferon alpha inducible protein 6 [Source:HGNC Symbol	ENSG00000126709	black	4.52e-06
ENSG00000129667	RHBDF2	rhomboid 5 homolog 2 [Source:HGNC Symbol	ENSG00000129667	black	0.0807528
ENSG00000129824	RPS4Y1	ribosomal protein S4 Y-linked 1 [Source:HGNC Symbol	ENSG00000129824	magenta	0.00126654
ENSG00000130303	BST2	bone marrow stromal cell antigen 2 [Source:HGNC Symbol	ENSG00000130303	black	0.000318901
ENSG00000130487	KLHDC7B	kelch domain containing 7B [Source:HGNC Symbol	ENSG00000130487	black	0.000374554
ENSG00000130589	HELZ2	helicase with zinc finger 2 [Source:HGNC Symbol	ENSG00000130589	black	0.00036375
ENSG00000130813	SHFL	shiftless antiviral inhibitor of ribosomal frameshifting [Source:HGNC Symbol	ENSG00000130813	black	0.0017385
ENSG00000132530	XAF1	XIAP associated factor 1 [Source:HGNC Symbol	ENSG00000132530	black	0.000223867
ENSG00000133106	EPSTI1	epithelial stromal interaction 1 [Source:HGNC Symbol	ENSG00000133106	black	0.000601695
ENSG00000134321	RSAD2	radical S-adenosyl methionine domain containing 2 [Source:HGNC Symbol	ENSG00000134321	black	5.55e-05
ENSG00000134326	CMPK2	cytidine/uridine monophosphate kinase 2 [Source:HGNC Symbol	ENSG00000134326	black	7.62e-05
ENSG00000134809	TIMM10	translocase of inner mitochondrial membrane 10 [Source:HGNC Symbol	ENSG00000134809	black	0.00970629
ENSG00000135114	OASL	2'-5'-oligoadenylate synthetase like [Source:HGNC Symbol	ENSG00000135114	black	0.00197463
ENSG00000135636	DYSF	dysferlin [Source:HGNC Symbol	ENSG00000135636	magenta	0.152026
ENSG00000136514	RTP4	receptor transporter protein 4 [Source:HGNC Symbol	ENSG00000136514	black	0.00123589
ENSG00000137200	CMTR1	cap methyltransferase 1 [Source:HGNC Symbol	ENSG00000137200	black	3.26e-05
ENSG00000137628	DDX60	DExD/H-box helicase 60 [Source:HGNC Symbol	ENSG00000137628	black	2.83e-06
ENSG00000137959	IFI44L	interferon induced protein 44 like [Source:HGNC Symbol	ENSG00000137959	black	2.01e-07
ENSG00000137965	IFI44	interferon induced protein 44 [Source:HGNC Symbol	ENSG00000137965	black	1.65e-06
ENSG00000138035	PNPT1	polyribonucleotide nucleotidyltransferase 1 [Source:HGNC Symbol	ENSG00000138035	black	0.000243054
ENSG00000138496	PARP9	poly(ADP-ribose) polymerase family member 9 [Source:HGNC Symbol	ENSG00000138496	black	0.000309464
ENSG00000138642	HERC6	HECT and RLD domain containing E3 ubiquitin protein ligase family member 6 [Source:HGNC Symbol	ENSG00000138642	black	2.96e-05
ENSG00000138646	HERC5	HECT and RLD domain containing E3 ubiquitin protein ligase 5 [Source:HGNC Symbol	ENSG00000138646	black	4.4e-06
ENSG00000139725	RHOF	ras homolog family member F, filopodia associated [Source:HGNC Symbol	ENSG00000139725	magenta	0.00154607
ENSG00000140464	PML	PML nuclear body scaffold [Source:HGNC Symbol	ENSG00000140464	black	0.000196665
ENSG00000140968	IRF8	interferon regulatory factor 8 [Source:HGNC Symbol	ENSG00000140968	magenta	0.128673
ENSG00000141252	VPS53	VPS53 subunit of GARP complex [Source:HGNC Symbol	ENSG00000141252	black	5.55e-05
ENSG00000141298	SSH2	slingshot protein phosphatase 2 [Source:HGNC Symbol	ENSG00000141298	black	0.00082305
ENSG00000141574	SECTM1	secreted and transmembrane 1 [Source:HGNC Symbol	ENSG00000141574	black	0.000305032
ENSG00000141664	ZCCHC2	zinc finger CCHC-type containing 2 [Source:HGNC Symbol	ENSG00000141664	black	1.49e-06
ENSG00000141971	MVB12A	multivesicular body subunit 12A [Source:HGNC Symbol	ENSG00000141971	black	0.00264493
ENSG00000141977	CIB3	calcium and integrin binding family member 3 [Source:HGNC Symbol	ENSG00000141977	black	0.00172096
ENSG00000142089	IFITM3	interferon induced transmembrane protein 3 [Source:HGNC Symbol	ENSG00000142089	black	0.00019173
ENSG00000142634	EFHD2	EF-hand domain family member D2 [Source:HGNC Symbol	ENSG00000142634	black	0.00056676
ENSG00000145431	PDGFC	platelet derived growth factor C [Source:HGNC Symbol	ENSG00000145431	magenta	0.00577107
ENSG00000148926	ADM	adrenomedullin [Source:HGNC Symbol	ENSG00000148926	magenta	3.17e-06
ENSG00000150401	DCUN1D2	defective in cullin neddylation 1 domain containing 2 [Source:HGNC Symbol	ENSG00000150401	black	0.000108338
ENSG00000151150	ANK3	ankyrin 3 [Source:HGNC Symbol	ENSG00000151150	black	4.59e-08
ENSG00000151353	TMEM18	transmembrane protein 18 [Source:HGNC Symbol	ENSG00000151353	magenta	0.0249305
ENSG00000152778	IFIT5	interferon induced protein with tetratricopeptide repeats 5 [Source:HGNC Symbol	ENSG00000152778	black	2.56e-05
ENSG00000154447	SH3RF1	SH3 domain containing ring finger 1 [Source:HGNC Symbol	ENSG00000154447	magenta	0.0260215
ENSG00000154451	GBP5	guanylate binding protein 5 [Source:HGNC Symbol	ENSG00000154451	black	7.3e-05
ENSG00000155363	MOV10	Mov10 RISC complex RNA helicase [Source:HGNC Symbol	ENSG00000155363	black	4.1e-05
ENSG00000155366	RHOC	ras homolog family member C [Source:HGNC Symbol	ENSG00000155366	black	0.00131717
ENSG00000156587	UBE2L6	ubiquitin conjugating enzyme E2 L6 [Source:HGNC Symbol	ENSG00000156587	black	0.000795287
ENSG00000156853	ZNF689	zinc finger protein 689 [Source:HGNC Symbol	ENSG00000156853	black	0.000103146
ENSG00000157551	KCNJ15	potassium inwardly rectifying channel subfamily J member 15 [Source:HGNC Symbol	ENSG00000157551	magenta	0.00963935
ENSG00000157601	MX1	MX dynamin like GTPase 1 [Source:HGNC Symbol	ENSG00000157601	black	0.000267842
ENSG00000157654	PALM2AKAP2	PALM2 and AKAP2 fusion [Source:HGNC Symbol	ENSG00000157654	black	0.00123775
ENSG00000157657	ZNF618	zinc finger protein 618 [Source:HGNC Symbol	ENSG00000157657	black	0.00158309
ENSG00000159403	C1R	complement C1r [Source:HGNC Symbol	ENSG00000159403	black	0.000697905
ENSG00000160710	ADAR	adenosine deaminase RNA specific [Source:HGNC Symbol	ENSG00000160710	black	0.000201701
ENSG00000160932	LY6E	lymphocyte antigen 6 family member E [Source:HGNC Symbol	ENSG00000160932	black	2.11e-05
ENSG00000162645	GBP2	guanylate binding protein 2 [Source:HGNC Symbol	ENSG00000162645	black	0.00154681
ENSG00000162654	GBP4	guanylate binding protein 4 [Source:HGNC Symbol	ENSG00000162654	black	0.00117552
ENSG00000162714	ZNF496	zinc finger protein 496 [Source:HGNC Symbol	ENSG00000162714	black	6.27e-06
ENSG00000163221	S100A12	S100 calcium binding protein A12 [Source:HGNC Symbol	ENSG00000163221	magenta	0.154907
ENSG00000163421	PROK2	prokineticin 2 [Source:HGNC Symbol	ENSG00000163421	magenta	0.0673565
ENSG00000163464	CXCR1	C-X-C motif chemokine receptor 1 [Source:HGNC Symbol	ENSG00000163464	magenta	0.00155886
ENSG00000163625	WDFY3	WD repeat and FYVE domain containing 3 [Source:HGNC Symbol	ENSG00000163625	magenta	0.0716127
ENSG00000163644	PPM1K	protein phosphatase, Mg2+/Mn2+ dependent 1K [Source:HGNC Symbol	ENSG00000163644	black	6.21e-05
ENSG00000163840	DTX3L	deltex E3 ubiquitin ligase 3L [Source:HGNC Symbol	ENSG00000163840	black	0.00203228
ENSG00000164054	SHISA5	shisa family member 5 [Source:HGNC Symbol	ENSG00000164054	black	0.000256751
ENSG00000165949	IFI27	interferon alpha inducible protein 27 [Source:HGNC Symbol	ENSG00000165949	black	0.000173556
ENSG00000166523	CLEC4E	C-type lectin domain family 4 member E [Source:HGNC Symbol	ENSG00000166523	magenta	0.0385257
ENSG00000166527	CLEC4D	C-type lectin domain family 4 member D [Source:HGNC Symbol	ENSG00000166527	magenta	0.192926
ENSG00000167210	LOXHD1	lipoxygenase homology PLAT domains 1 [Source:HGNC Symbol	ENSG00000167210	magenta	0.218558
ENSG00000167608	TMC4	transmembrane channel like 4 [Source:HGNC Symbol	ENSG00000167608	magenta	0.00044527
ENSG00000167618	LAIR2	leukocyte associated immunoglobulin like receptor 2 [Source:HGNC Symbol	ENSG00000167618	magenta	0.180188
ENSG00000168502	MTCL1	microtubule crosslinking factor 1 [Source:HGNC Symbol	ENSG00000168502	magenta	0.0398808
ENSG00000168795	ZBTB5	zinc finger and BTB domain containing 5 [Source:HGNC Symbol	ENSG00000168795	black	0.00324223
ENSG00000168961	LGALS9	galectin 9 [Source:HGNC Symbol	ENSG00000168961	black	0.0104164
ENSG00000169047	IRS1	insulin receptor substrate 1 [Source:HGNC Symbol	ENSG00000169047	black	9.66e-05
ENSG00000170581	STAT2	signal transducer and activator of transcription 2 [Source:HGNC Symbol	ENSG00000170581	black	0.00283789
ENSG00000170837	GPR27	G protein-coupled receptor 27 [Source:HGNC Symbol	ENSG00000170837	magenta	0.00111679
ENSG00000171159	BBLN	bublin coiled coil protein [Source:HGNC Symbol	ENSG00000171159	black	0.00021532
ENSG00000173193	PARP14	poly(ADP-ribose) polymerase family member 14 [Source:HGNC Symbol	ENSG00000173193	black	1.35e-06
ENSG00000173762	CD7	CD7 molecule [Source:HGNC Symbol	ENSG00000173762	black	0.000235014
ENSG00000173786	CNP	2',3'-cyclic nucleotide 3' phosphodiesterase [Source:HGNC Symbol	ENSG00000173786	black	1.46e-06
ENSG00000173821	RNF213	ring finger protein 213 [Source:HGNC Symbol	ENSG00000173821	black	2.79e-05
ENSG00000174123	TLR10	toll like receptor 10 [Source:HGNC Symbol	ENSG00000174123	magenta	0.00241673
ENSG00000174276	ZNHIT2	zinc finger HIT-type containing 2 [Source:HGNC Symbol	ENSG00000174276	black	0.000807697
ENSG00000174514	MFSD4A	major facilitator superfamily domain containing 4A [Source:HGNC Symbol	ENSG00000174514	magenta	0.00768732
ENSG00000174516	PELI3	pellino E3 ubiquitin protein ligase family member 3 [Source:HGNC Symbol	ENSG00000174516	black	0.00152275
ENSG00000175048	ZDHHC14	zinc finger DHHC-type palmitoyltransferase 14 [Source:HGNC Symbol	ENSG00000175048	black	0.00281221
ENSG00000177989	ODF3B	outer dense fiber of sperm tails 3B [Source:HGNC Symbol	ENSG00000177989	black	8.99e-05
ENSG00000178685	PARP10	poly(ADP-ribose) polymerase family member 10 [Source:HGNC Symbol	ENSG00000178685	black	0.0294664
ENSG00000179163	FUCA1	alpha-L-fucosidase 1 [Source:HGNC Symbol	ENSG00000179163	black	3.93e-06
ENSG00000179271	GADD45GIP1	GADD45G interacting protein 1 [Source:HGNC Symbol	ENSG00000179271	black	0.000296301
ENSG00000181381	DDX60L	DExD/H-box 60 like [Source:HGNC Symbol	ENSG00000181381	black	0.000193297
ENSG00000181409	AATK	apoptosis associated tyrosine kinase [Source:HGNC Symbol	ENSG00000181409	magenta	0.00371097
ENSG00000183486	MX2	MX dynamin like GTPase 2 [Source:HGNC Symbol	ENSG00000183486	black	4.06e-05
ENSG00000183617	MRPL54	mitochondrial ribosomal protein L54 [Source:HGNC Symbol	ENSG00000183617	black	0.000796036
ENSG00000183785	TUBA8	tubulin alpha 8 [Source:HGNC Symbol	ENSG00000183785	black	0.00112322
ENSG00000184979	USP18	ubiquitin specific peptidase 18 [Source:HGNC Symbol	ENSG00000184979	black	0.000304774
ENSG00000185404	SP140L	SP140 nuclear body protein like [Source:HGNC Symbol	ENSG00000185404	black	0.0410596
ENSG00000185507	IRF7	interferon regulatory factor 7 [Source:HGNC Symbol	ENSG00000185507	black	0.00121528
ENSG00000185650	ZFP36L1	ZFP36 ring finger protein like 1 [Source:HGNC Symbol	ENSG00000185650	magenta	0.000194323
ENSG00000186806	VSIG10L	V-set and immunoglobulin domain containing 10 like [Source:HGNC Symbol	ENSG00000186806	black	0.00181398
ENSG00000187260	WDR86	WD repeat domain 86 [Source:HGNC Symbol	ENSG00000187260	black	0.000679227
ENSG00000187608	ISG15	ISG15 ubiquitin like modifier [Source:HGNC Symbol	ENSG00000187608	black	0.000151313
ENSG00000187741	FANCA	FA complementation group A [Source:HGNC Symbol	ENSG00000187741	black	0.149844
ENSG00000188157	AGRN	agrin [Source:HGNC Symbol	ENSG00000188157	black	2.33e-05
ENSG00000188313	PLSCR1	phospholipid scramblase 1 [Source:HGNC Symbol	ENSG00000188313	black	0.00423837
ENSG00000188897	None	novel lipoprotein amino terminal region containing protein	ENSG00000188897	magenta	0.0039685
ENSG00000196116	TDRD7	tudor domain containing 7 [Source:HGNC Symbol	ENSG00000196116	black	2.45e-06
ENSG00000196141	SPATS2L	spermatogenesis associated serine rich 2 like [Source:HGNC Symbol	ENSG00000196141	black	2.2e-07
ENSG00000196369	SRGAP2B	SLIT-ROBO Rho GTPase activating protein 2B [Source:HGNC Symbol	ENSG00000196369	magenta	0.0188149
ENSG00000196549	MME	membrane metalloendopeptidase [Source:HGNC Symbol	ENSG00000196549	magenta	0.000785806
ENSG00000196684	HSH2D	hematopoietic SH2 domain containing [Source:HGNC Symbol	ENSG00000196684	black	0.0045763
ENSG00000197122	SRC	SRC proto-oncogene, non-receptor tyrosine kinase [Source:HGNC Symbol	ENSG00000197122	black	0.00545388
ENSG00000197483	ZNF628	zinc finger protein 628 [Source:HGNC Symbol	ENSG00000197483	black	0.000260332
ENSG00000197506	SLC28A3	solute carrier family 28 member 3 [Source:HGNC Symbol	ENSG00000197506	magenta	0.0897645
ENSG00000197599	CCDC154	coiled-coil domain containing 154 [Source:HGNC Symbol	ENSG00000197599	black	0.00949809
ENSG00000198223	CSF2RA	colony stimulating factor 2 receptor subunit alpha [Source:HGNC Symbol	ENSG00000198223	magenta	1.4e-05
ENSG00000204264	PSMB8	proteasome 20S subunit beta 8 [Source:HGNC Symbol	ENSG00000204264	black	0.000687772
ENSG00000204525	HLA-C	major histocompatibility complex, class I, C [Source:HGNC Symbol	ENSG00000204525	black	0.0321418
ENSG00000204592	HLA-E	major histocompatibility complex, class I, E [Source:HGNC Symbol	ENSG00000204592	black	4.41e-05
ENSG00000204632	HLA-G	major histocompatibility complex, class I, G [Source:HGNC Symbol	ENSG00000204632	black	0.000661224
ENSG00000204936	CD177	CD177 molecule [Source:HGNC Symbol	ENSG00000204936	magenta	0.169085
ENSG00000206503	HLA-A	major histocompatibility complex, class I, A [Source:HGNC Symbol	ENSG00000206503	black	1.48e-05
ENSG00000214193	SH3D21	SH3 domain containing 21 [Source:HGNC Symbol	ENSG00000214193	black	0.0062616
ENSG00000214872	SMTNL1	smoothelin like 1 [Source:HGNC Symbol	ENSG00000214872	black	0.000197319
ENSG00000218891	ZNF579	zinc finger protein 579 [Source:HGNC Symbol	ENSG00000218891	black	5.07e-06
ENSG00000221963	APOL6	apolipoprotein L6 [Source:HGNC Symbol	ENSG00000221963	black	0.00568182
ENSG00000221983	UBA52	ubiquitin A-52 residue ribosomal protein fusion product 1 [Source:HGNC Symbol	ENSG00000221983	black	0.00128582
ENSG00000231925	TAPBP	TAP binding protein [Source:HGNC Symbol	ENSG00000231925	black	0.0511661
ENSG00000234745	HLA-B	major histocompatibility complex, class I, B [Source:HGNC Symbol	ENSG00000234745	black	0.00476925
ENSG00000241106	HLA-DOB	major histocompatibility complex, class II, DO beta [Source:HGNC Symbol	ENSG00000241106	black	0.0289725
ENSG00000254521	SIGLEC12	sialic acid binding Ig like lectin 12 [Source:HGNC Symbol	ENSG00000254521	magenta	0.00531965
ENSG00000261796	ISY1-RAB43	ISY1-RAB43 readthrough [Source:HGNC Symbol	ENSG00000261796	black	0.000133037
ENSG00000269720	CCDC194	coiled-coil domain containing 194 [Source:HGNC Symbol	ENSG00000269720	black	0.000144888
ENSG00000270629	NBPF14	NBPF member 14 [Source:HGNC Symbol	ENSG00000270629	black	0.0148194
ENSG00000275895	None	U2 small nuclear RNA auxiliary factor 1-like 5	ENSG00000275895	magenta	0.0154349
ENSG00000277443	MARCKS	myristoylated alanine rich protein kinase C substrate [Source:HGNC Symbol	ENSG00000277443	magenta	0.14108
ENSG00000284194	SCO2	synthesis of cytochrome C oxidase 2 [Source:HGNC Symbol	ENSG00000284194	black	0.0163155
