# Supplementary material for: Innate biosignature of treatment failure in human cutaneous leishmaniasis
Source: Research Square preprint supplement (doi:10.21203/rs.3.rs-4271873/v1), 2024-05-02
Supplement: Supplementary file 5 [file 73f78d7ede05ef03c69de327.xlsx]

## Sheet: GSVA
Table S7. GSVA analysis of normalized expression data using hallmark mSigDB gene sets
Cell type	row.names	logfc	aveexpr	t	p.value	description_brief	members	members_symbolized
Neutrophil	HALLMARK_ADIPOGENESIS	-0.00651	0.32	-2.323	0.02506	Genes up-regulated during adipocyte differentiation (adipogenesis).	FABP4,ADIPOQ,PPARG,LIPE,DGAT1,LPL,CPT2,CD36,GPAM,ADIPOR2,ACAA2,ETFB,ACOX1,ACADM,HADH,IDH1,SORBS1,ACADS,UCK1,SCP2,DECR1,CDKN2C,TALDO1,TST,MCCC1,PGM1,REEP5,BCL2L13,SLC25A10,ME1,PHYH,PIM3,YWHAG,NDUFAB1,GPD2,ADIG,ECHS1,QDPR,CS,ECH1,SLC25A1,ACADL,TOB1,GRPEL1,CRAT,GBE1,SDPR,SCARB1,PEMT,CHCHD10,AK2,APOE,UQCR10,TANK,ANGPTL4,ACO2,FAH,ACLY,IFNGR1,SLC5A6,JAGN1,EPHX2,IDH3G,GPX3,ELMOD3,ORM1,RETSAT,ESRRA,HIBCH…	FABP4,ADIPOQ,PPARG,LIPE,DGAT1,LPL,CPT2,CD36,GPAM,ADIPOR2,ACAA2,ETFB,ACOX1,ACADM,HADH,IDH1,SORBS1,ACADS,UCK1,SCP2,DECR1,CDKN2C,TALDO1,TST,MCCC1,PGM1,REEP5,BCL2L13,SLC25A10,ME1,PHYH,PIM3,YWHAG,NDUFAB1,GPD2,ADIG,ECHS1,QDPR,CS,ECH1,SLC25A1,ACADL,TOB1,GRPEL1,CRAT,GBE1,CAVIN2,SCARB1,PEMT,CHCHD10,AK2,APOE,UQCR10,TANK,ANGPTL4,ACO2,FAH,ACLY,IFNGR1,SLC5A6,JAGN1,EPHX2,IDH3G,GPX3,ELMOD3,ORM1,RETSAT,ESRRA,HIB…
Monocyte	HALLMARK_ADIPOGENESIS	-0.0122	0.4746	-3.138	0.003073	Genes involved in development of skeletal muscle (myogenesis).
Monocyte	HALLMARK_APICAL_JUNCTION	-0.007083	0.2944	-2.453	0.0183	Genes encoding components of apical junction complex.	ACTN1,CLDN7,ACTN3,CLDN19,DLG1,TJP1,COL17A1,PVRL1,CLDN9,CDH3,CTNND1,CDH1,LIMA1,VCL,SHROOM2,PVRL3,PVRL2,CLDN14,PTPRC,THY1,VASP,ITGB1,ZYX,ACTN4,CLDN4,CADM3,ITGA3,NF2,B4GALT1,NEXN,CDH6,ADAM15,PTK2,HADH,LAMB3,CLDN11,CDH4,IRS1,SORBS3,CLDN8,EVL,CLDN15,THBS3,PVRL4,JAM3,CDH11,ITGB4,RASA1,AKT2,TMEM8B,LAMA3,RSU1,ICAM1,CLDN18,GTF2F1,TSC1,LAMC2,NRAP,CTNNA1,CD99,FSCN1,COL16A1,GNAI2,TGFBI,MPP5,JUP,ACTN2,INSIG1,…	ACTN1,CLDN7,ACTN3,CLDN19,DLG1,TJP1,COL17A1,NECTIN1,CLDN9,CDH3,CTNND1,CDH1,LIMA1,VCL,SHROOM2,NECTIN3,NECTIN2,CLDN14,PTPRC,THY1,VASP,ITGB1,ZYX,ACTN4,CLDN4,CADM3,ITGA3,NF2,B4GALT1,NEXN,CDH6,ADAM15,PTK2,HADH,LAMB3,CLDN11,CDH4,IRS1,SORBS3,CLDN8,EVL,CLDN15,THBS3,NECTIN4,JAM3,CDH11,ITGB4,RASA1,AKT2,TMEM8B,LAMA3,RSU1,ICAM1,CLDN18,GTF2F1,TSC1,LAMC2,NRAP,CTNNA1,CD99,FSCN1,COL16A1,GNAI2,TGFBI,PALS1,JUP,ACTN…
Monocyte	HALLMARK_COAGULATION	-0.02071	0.1129	-3.504	0.001083	Genes encoding components of blood coagulation system; also up-regulated in platelets.	F2,PROC,C1S,MMP14,F10,PLG,C1R,SERPINE1,SERPING1,C2,F12,CFI,MMP2,C3,F9,CTSO,TMPRSS6,MMP9,PROZ,MMP1,CFB,BMP1,VWF,FGA,F11,THBD,FURIN,MMP11,F8,LGMN,HPN,CTSB,MBL2,F13B,TIMP1,CTSL2,MMP8,A2M,MMP10,MASP2,FGG,C8A,PLAU,ADAM9,GSN,CAPN2,PLAT,FN1,CTSH,OLR1,SPARC,RGN,C8B,LAMP2,C9,PROS1,CLU,F2RL2,CD9,CFH,PREP,LTA4H,GP9,DUSP14,CTSK,GDA,CASP9,APOC1,CRIP2,KLK8,SERPINC1,ANXA1,ITIH1,PRSS23,FBN1,MST1,F3,KLF7,CTSE,ITG…	F2,PROC,C1S,MMP14,F10,PLG,C1R,SERPINE1,SERPING1,C2,F12,CFI,MMP2,C3,F9,CTSO,TMPRSS6,MMP9,PROZ,MMP1,CFB,BMP1,VWF,FGA,F11,THBD,FURIN,MMP11,F8,LGMN,HPN,CTSB,MBL2,F13B,TIMP1,CTSV,MMP8,A2M,MMP10,MASP2,FGG,C8A,PLAU,ADAM9,GSN,CAPN2,PLAT,FN1,CTSH,OLR1,SPARC,RGN,C8B,LAMP2,C9,PROS1,CLU,F2RL2,CD9,CFH,PREP,LTA4H,GP9,DUSP14,CTSK,GDA,CASP9,APOC1,CRIP2,KLK8,SERPINC1,ANXA1,ITIH1,PRSS23,FBN1,MST1,F3,KLF7,CTSE,ITGB…
Monocyte	HALLMARK_DNA_REPAIR	-0.009877	0.478	-2.707	0.009697	Genes involved in DNA repair.	POLR2H,POLR2A,POLR2G,POLR2E,POLR2J,POLR2F,POLR2C,POLR2K,GTF2H3,POLR2D,ERCC3,DDB2,POLR1C,XPC,PCNA,POLR2I,SUPT4H1,POLD3,POLR3GL,POLR3C,GTF2B,POLR1D,NCBP2,RDBP,GTF2F1,ERCC5,LIG1,ERCC1,ERCC4,POLD4,COBRA1,RFC2,ELL,TAF10,RRM2B,SUPT5H,RPA3,SNAPC5,SSRP1,RFC3,RPA2,TCEB3,TAF12,TH1L,TAF13,TAF6,TAF9,GTF2A2,VPS37D,NME1,RNMT,ERCC2,POLE4,VPS37B,NT5C3,SNAPC4,AAAS,ZNRD1,RFC4,ITPA,POM121,BRF2,RFC5,SAC3D1,CLP1,NME4…	POLR2H,POLR2A,POLR2G,POLR2E,POLR2J,POLR2F,POLR2C,POLR2K,GTF2H3,POLR2D,ERCC3,DDB2,POLR1C,XPC,PCNA,POLR2I,SUPT4H1,POLD3,POLR3GL,POLR3C,GTF2B,POLR1D,NCBP2,NELFE,GTF2F1,ERCC5,LIG1,ERCC1,ERCC4,POLD4,NELFB,RFC2,ELL,TAF10,RRM2B,SUPT5H,RPA3,SNAPC5,SSRP1,RFC3,RPA2,ELOA,TAF12,NELFCD,TAF13,TAF6,TAF9,GTF2A2,VPS37D,NME1,RNMT,ERCC2,POLE4,VPS37B,NT5C3A,SNAPC4,AAAS,POLR1H,RFC4,ITPA,POM121,BRF2,RFC5,SAC3D1,CLP1,N…
Neutrophil	HALLMARK_ESTROGEN_RESPONSE_EARLY	-0.007003	0.2028	-1.915	0.06225	Genes defining early response to estrogen.	GREB1,CA12,SLC9A3R1,MYB,ANXA9,IGFBP4,SYBU,NPY1R,PDZK1,NRIP1,MLPH,HSPB8,EGR3,KRT19,LRIG1,KDM4B,PGR,RHOBTB3,TPD52L1,ELOVL2,RET,TPBG,TFF1,MAPT,SCNN1A,ABAT,FLNB,XBP1,CELSR2,RAB31,MYBL1,MREG,FAM102A,MSMB,STC2,FAM134B,SIAH2,ZNF185,SLC19A2,SLC1A4,FHL2,BCL2,PMAIP1,AREG,OVOL2,TSKU,ADCY9,RASGRP1,MUC1,KAZN,SLC27A2,FKBP4,CXCL12,TMPRSS3,RARA,IL17RB,CBFA2T3,TFF3,UGCG,CCND1,SLC22A5,WFS1,PTGES,WWC1,WISP2,MYC,ITP…	GREB1,CA12,SLC9A3R1,MYB,ANXA9,IGFBP4,SYBU,NPY1R,PDZK1,NRIP1,MLPH,HSPB8,EGR3,KRT19,LRIG1,KDM4B,PGR,RHOBTB3,TPD52L1,ELOVL2,RET,TPBG,TFF1,MAPT,SCNN1A,ABAT,FLNB,XBP1,CELSR2,RAB31,MYBL1,MREG,FAM102A,MSMB,STC2,RETREG1,SIAH2,ZNF185,SLC19A2,SLC1A4,FHL2,BCL2,PMAIP1,AREG,OVOL2,TSKU,ADCY9,RASGRP1,MUC1,KAZN,SLC27A2,FKBP4,CXCL12,TMPRSS3,RARA,IL17RB,CBFA2T3,TFF3,UGCG,CCND1,SLC22A5,WFS1,PTGES,WWC1,CCN5,MYC,ITPK…
Monocyte	HALLMARK_ESTROGEN_RESPONSE_EARLY	-0.01288	0.2289	-2.831	0.007035
Eosinophil	HALLMARK_ESTROGEN_RESPONSE_LATE	-0.01093	0.1741	-2.438	0.02139	Genes defining late response to estrogen.	TFF1,SLC9A3R1,TPD52L1,PRSS23,CA12,PDZK1,ANXA9,CELSR2,TJP3,PGR,RET,MYB,TPBG,EGR3,ARL3,OLFM1,NPY1R,SCNN1A,XBP1,AREG,IL17RB,NRIP1,ASS1,TFF3,FKBP4,SLC27A2,SEMA3B,GPER,LLGL2,AGR2,KRT19,WISP2,BLVRB,FLNB,PDCD4,CALCR,IGFBP4,DNAJC12,TIAM1,TSPAN13,CXCL12,RAB31,PKP3,CYP26B1,FKBP5,SIAH2,ISG20,TMPRSS3,SERPINA3,WFS1,MAPT,PDLIM3,RBBP8,GJB3,PRLR,SLC1A4,FOS,PLA2G16,SLC7A5,SERPINA5,IMPA2,DHCR7,MYOF,CDH1,EMP2,OVOL2…	TFF1,SLC9A3R1,TPD52L1,PRSS23,CA12,PDZK1,ANXA9,CELSR2,TJP3,PGR,RET,MYB,TPBG,EGR3,ARL3,OLFM1,NPY1R,SCNN1A,XBP1,AREG,IL17RB,NRIP1,ASS1,TFF3,FKBP4,SLC27A2,SEMA3B,GPER1,LLGL2,AGR2,KRT19,CCN5,BLVRB,FLNB,PDCD4,CALCR,IGFBP4,DNAJC12,TIAM1,TSPAN13,CXCL12,RAB31,PKP3,CYP26B1,FKBP5,SIAH2,ISG20,TMPRSS3,SERPINA3,WFS1,MAPT,PDLIM3,RBBP8,GJB3,PRLR,SLC1A4,FOS,PLAAT3,SLC7A5,SERPINA5,IMPA2,DHCR7,MYOF,CDH1,EMP2,OVOL2,…
Neutrophil	HALLMARK_ESTROGEN_RESPONSE_LATE	-0.00729	0.1629	-2.09	0.04274
Monocyte	HALLMARK_ESTROGEN_RESPONSE_LATE	-0.01065	0.1873	-2.632	0.01174
Monocyte	HALLMARK_G2M_CHECKPOINT	0.00579	0.4107	2.063	0.04516	Genes involved in the G2/M checkpoint, as in progression through the cell division cycle.	AURKA,CCNA2,TOP2A,CCNB2,CENPA,BIRC5,CDC20,PLK1,TTK,PRC1,NDC80,KIF11,NUSAP1,CKS2,KIF2C,MKI67,AURKB,TPX2,SMC4,BUB1,CENPF,RACGAP1,CENPE,KIF23,UBE2C,MCM6,MCM3,PTTG1,CDK1,KIF4A,ESPL1,MAD2L1,NEK2,KIF22,HMMR,KPNA2,CDKN3,CDC25A,H2AFX,CDC25B,PLK4,CDC6,CCNF,MCM5,LMNB1,E2F3,KIF15,CHEK1,UBE2S,WHSC1,HMGB3,DBF4,TACC3,MCM2,CDKN2C,CDKN1B,FANCC,NASP,STAG1,GINS2,FBXO5,POLQ,EZH2,RAD21,STMN1,SUV39H1,PRIM2,E2F1,CHAF1…	AURKA,CCNA2,TOP2A,CCNB2,CENPA,BIRC5,CDC20,PLK1,TTK,PRC1,NDC80,KIF11,NUSAP1,CKS2,KIF2C,MKI67,AURKB,TPX2,SMC4,BUB1,CENPF,RACGAP1,CENPE,KIF23,UBE2C,MCM6,MCM3,PTTG1,CDK1,KIF4A,ESPL1,MAD2L1,NEK2,KIF22,HMMR,KPNA2,CDKN3,CDC25A,H2AX,CDC25B,PLK4,CDC6,CCNF,MCM5,LMNB1,E2F3,KIF15,CHEK1,UBE2S,NSD2,HMGB3,DBF4,TACC3,MCM2,CDKN2C,CDKN1B,FANCC,NASP,STAG1,GINS2,FBXO5,POLQ,EZH2,RAD21,STMN1,SUV39H1,PRIM2,E2F1,CHAF1A,…
Eosinophil	HALLMARK_GLYCOLYSIS	-0.007436	0.2838	-2.01	0.05419	Genes encoding proteins involved in glycolysis and gluconeogenesis.	PGK1,ALDOA,ENO1,TPI1,PFKP,ERO1L,ALDOB,VEGFA,MXI1,PKM2,HK2,LDHA,EXT1,SLC25A10,GUSB,PFKFB1,PGAM1,PYGB,AK4,P4HA1,PMM2,FAM162A,SDC1,EGLN3,PC,B4GALT7,FBP2,IGFBP3,CHPF,B3GAT3,CHST12,HS2ST1,MPI,GNPDA1,AKR1A1,PPFIA4,B3GAT1,CHPF2,G6PD,MDH2,CHST6,PGLS,PGAM2,CHST1,GPC1,TSTA3,ALG1,GFPT1,PRPS1,GOT1,MDH1,SLC35A3,GALK1,EGFR,ANGPTL4,CITED2,PLOD2,QSOX1,ME2,SPAG4,P4HA2,GAPDHS,ENO2,GOT2,EXT2,SLC25A13,HMMR,PDK3,CXCR…	PGK1,ALDOA,ENO1,TPI1,PFKP,ERO1A,ALDOB,VEGFA,MXI1,PKM,HK2,LDHA,EXT1,SLC25A10,GUSB,PFKFB1,PGAM1,PYGB,AK4,P4HA1,PMM2,FAM162A,SDC1,EGLN3,PC,B4GALT7,FBP2,IGFBP3,CHPF,B3GAT3,CHST12,HS2ST1,MPI,GNPDA1,AKR1A1,PPFIA4,B3GAT1,CHPF2,G6PD,MDH2,CHST6,PGLS,PGAM2,CHST1,GPC1,GFUS,ALG1,GFPT1,PRPS1,GOT1,MDH1,SLC35A3,GALK1,EGFR,ANGPTL4,CITED2,PLOD2,QSOX1,ME2,SPAG4,P4HA2,GAPDHS,ENO2,GOT2,EXT2,SLC25A13,HMMR,PDK3,CXCR4,…
Monocyte	HALLMARK_GLYCOLYSIS	-0.01139	0.3305	-3.97	0.0002685
Eosinophil	HALLMARK_HYPOXIA	-0.008578	0.3236	-1.939	0.06265	Genes up-regulated in response to low oxygen levels (hypoxia).	PGK1,PDK1,GBE1,PFKL,ALDOA,ENO2,PGM1,NDRG1,HK2,ALDOC,GPI,MXI1,SLC2A1,P4HA1,ADM,P4HA2,ENO1,PFKP,AK4,FAM162A,PFKFB3,VEGFA,BNIP3L,TPI1,ERO1L,KDM3A,CCNG2,LDHA,GYS1,GAPDH,BHLHE40,ANGPTL4,JUN,SERPINE1,LOX,GCK,PPFIA4,MAFF,DDIT4,SLC2A3,IGFBP3,NFIL3,FOS,RBPJ,HK1,CITED2,ISG20,GALK1,WSB1,PYGM,STC1,ZNF292,BTG1,PLIN2,CSRP2,VLDLR,JMJD6,EXT1,F3,PDK3,ANKZF1,UGP2,ALDOB,STC2,ERRFI1,ENO3,PNRC1,HMOX1,PGF,GAPDHS,CHST2…	PGK1,PDK1,GBE1,PFKL,ALDOA,ENO2,PGM1,NDRG1,HK2,ALDOC,GPI,MXI1,SLC2A1,P4HA1,ADM,P4HA2,ENO1,PFKP,AK4,FAM162A,PFKFB3,VEGFA,BNIP3L,TPI1,ERO1A,KDM3A,CCNG2,LDHA,GYS1,GAPDH,BHLHE40,ANGPTL4,JUN,SERPINE1,LOX,GCK,PPFIA4,MAFF,DDIT4,SLC2A3,IGFBP3,NFIL3,FOS,RBPJ,HK1,CITED2,ISG20,GALK1,WSB1,PYGM,STC1,ZNF292,BTG1,PLIN2,CSRP2,VLDLR,JMJD6,EXT1,F3,PDK3,ANKZF1,UGP2,ALDOB,STC2,ERRFI1,ENO3,PNRC1,HMOX1,PGF,GAPDHS,CHST2…
Neutrophil	HALLMARK_HYPOXIA	-0.006369	0.3185	-1.931	0.06027
Monocyte	HALLMARK_HYPOXIA	-0.0118	0.3908	-2.787	0.00788
Eosinophil	HALLMARK_INTERFERON_ALPHA_RESPONSE	0.1034	0.5517	4.717	6.057e-05	Genes up-regulated in response to alpha interferon proteins.	MX1,ISG15,OAS1,IFIT3,IFI44,IFI35,IRF7,RSAD2,IFI44L,IFITM1,IFI27,IRF9,OASL,EIF2AK2,IFIT2,CXCL10,TAP1,SP110,DDX60,UBE2L6,USP18,PSMB8,IFIH1,BST2,LGALS3BP,ADAR,ISG20,GBP2,IRF1,PLSCR1,PSMB9,HERC6,SAMD9,CMPK2,IFITM3,RTP4,STAT2,SAMD9L,LY6E,IFITM2,PRIC285,CXCL11,TRIM21,PARP14,TRIM26,PARP12,NMI,RNF31,HLA-C,CASP1,TRIM14,TDRD7,DHX58,PARP9,PNPT1,TRIM25,PSME1,WARS,EPSTI1,UBA7,PSME2,B2M,TRIM5,C1S,LAP3,LAMP3,GB…	MX1,ISG15,OAS1,IFIT3,IFI44,IFI35,IRF7,RSAD2,IFI44L,IFITM1,IFI27,IRF9,OASL,EIF2AK2,IFIT2,CXCL10,TAP1,SP110,DDX60,UBE2L6,USP18,PSMB8,IFIH1,BST2,LGALS3BP,ADAR,ISG20,GBP2,IRF1,PLSCR1,PSMB9,HERC6,SAMD9,CMPK2,IFITM3,RTP4,STAT2,SAMD9L,LY6E,IFITM2,HELZ2,CXCL11,TRIM21,PARP14,TRIM26,PARP12,NMI,RNF31,HLA-C,CASP1,TRIM14,TDRD7,DHX58,PARP9,PNPT1,TRIM25,PSME1,WARS1,EPSTI1,UBA7,PSME2,B2M,TRIM5,C1S,LAP3,LAMP3,GBP…
Neutrophil	HALLMARK_INTERFERON_ALPHA_RESPONSE	0.04197	0.6484	2.43	0.01945
Monocyte	HALLMARK_INTERFERON_ALPHA_RESPONSE	0.03609	0.6583	2.161	0.03627
Eosinophil	HALLMARK_INTERFERON_GAMMA_RESPONSE	0.0585	0.5121	4.246	0.0002181	Genes up-regulated in response to IFNG [GeneID=3458].	STAT1,ISG15,IFIT1,MX1,IFIT3,IFI35,IRF7,IFIT2,OAS2,TAP1,EIF2AK2,RSAD2,MX2,IRF1,OAS3,TNFSF10,IRF9,CXCL10,IFI44,BST2,XAF1,SP110,OASL,PSMB8,IFI44L,IFITM3,DDX60,LGALS3BP,GBP4,IRF8,PSMB9,PML,IFIH1,UBE2L6,IFI27,ADAR,LY6E,STAT2,CXCL9,IL10RA,PLA2G4A,TRIM21,USP18,PTGS2,EPSTI1,C1S,DDX58,IL15,NLRC5,NMI,IDO1,PSMB10,CXCL11,ITGB7,SAMHD1,HERC6,CMPK2,SAMD9L,RTP4,PTPN2,PARP14,TNFAIP2,IFITM2,PLSCR1,SOCS1,CASP1,ICAM…	STAT1,ISG15,IFIT1,MX1,IFIT3,IFI35,IRF7,IFIT2,OAS2,TAP1,EIF2AK2,RSAD2,MX2,IRF1,OAS3,TNFSF10,IRF9,CXCL10,IFI44,BST2,XAF1,SP110,OASL,PSMB8,IFI44L,IFITM3,DDX60,LGALS3BP,GBP4,IRF8,PSMB9,PML,IFIH1,UBE2L6,IFI27,ADAR,LY6E,STAT2,CXCL9,IL10RA,PLA2G4A,TRIM21,USP18,PTGS2,EPSTI1,C1S,DDX58,IL15,NLRC5,NMI,IDO1,PSMB10,CXCL11,ITGB7,SAMHD1,HERC6,CMPK2,SAMD9L,RTP4,PTPN2,PARP14,TNFAIP2,IFITM2,PLSCR1,SOCS1,CASP1,ICAM…
Neutrophil	HALLMARK_INTERFERON_GAMMA_RESPONSE	0.02524	0.5831	2.109	0.0409
Monocyte	HALLMARK_INTERFERON_GAMMA_RESPONSE	0.02353	0.662	1.916	0.06206
Eosinophil	HALLMARK_MTORC1_SIGNALING	-0.009051	0.5036	-1.795	0.08345	Genes up-regulated through activation of mTORC1 complex.	FADS1,DDIT4,CALR,HK2,PGK1,SLC7A5,CTSC,ACSL3,SLC1A5,M6PR,TFRC,DDIT3,TMEM97,IFRD1,PLOD2,TUBA4A,PSAT1,CORO1A,LDHA,MTHFD2,FADS2,VLDLR,WARS,SCD,P4HA1,ACTR2,IDH1,SLC2A1,GBE1,SERPINH1,NUPR1,PSMG1,PSPH,NAMPT,CDKN1A,BHLHE40,HSPA9,HSPA5,EGLN3,LGMN,PNP,XBP1,SLA,DDX39A,HSPE1,ACLY,SLC7A11,SSR1,GLA,SQSTM1,PDK1,PSMC2,PRDX1,SERP1,TRIB3,NFIL3,HMGCS1,GOT1,TPI1,ELOVL6,ASNS,PSMD14,PSMA4,PPA1,HPRT1,AURKA,HMGCR,GAPDH,…	FADS1,DDIT4,CALR,HK2,PGK1,SLC7A5,CTSC,ACSL3,SLC1A5,M6PR,TFRC,DDIT3,TMEM97,IFRD1,PLOD2,TUBA4A,PSAT1,CORO1A,LDHA,MTHFD2,FADS2,VLDLR,WARS1,SCD,P4HA1,ACTR2,IDH1,SLC2A1,GBE1,SERPINH1,NUPR1,PSMG1,PSPH,NAMPT,CDKN1A,BHLHE40,HSPA9,HSPA5,EGLN3,LGMN,PNP,XBP1,SLA,DDX39A,HSPE1,ACLY,SLC7A11,SSR1,GLA,SQSTM1,PDK1,PSMC2,PRDX1,SERP1,TRIB3,NFIL3,HMGCS1,GOT1,TPI1,ELOVL6,ASNS,PSMD14,PSMA4,PPA1,HPRT1,AURKA,HMGCR,GAPDH…
Monocyte	HALLMARK_MTORC1_SIGNALING	-0.008944	0.5668	-2.421	0.01976
Eosinophil	HALLMARK_MYC_TARGETS_V2	0.01036	0.2665	1.981	0.05752	A subgroup of genes regulated by MYC - version 2 (v2).	SLC19A1,MRTO4,TMEM97,RRP9,PES1,TFB2M,EXOSC5,IPO4,NDUFAF4,NOC4L,MYC,SRM,PA2G4,GNL3,NOLC1,WDR43,RABEPK,NOP16,TBRG4,DDX18,NIP7,WDR74,BYSL,HSPD1,PLK4,NOP2,PPAN,NOP56,RCL1,NPM1,AIMP2,RRP12,PPRC1,TCOF1,MCM5,HK2,CBX3,PLK1,PHB,MCM4,CDK4,DUSP2,MYBBP1A,UTP20,PRMT3,FARSA,MAP3K6,LAS1L,PUS1,HSPE1,SLC29A2,DCTPP1,SUPV3L1,SORD,IMP4,GRWD1,UNG,MPHOSPH10	SLC19A1,MRTO4,TMEM97,RRP9,PES1,TFB2M,EXOSC5,IPO4,NDUFAF4,NOC4L,MYC,SRM,PA2G4,GNL3,NOLC1,WDR43,RABEPK,NOP16,TBRG4,DDX18,NIP7,WDR74,BYSL,HSPD1,PLK4,NOP2,PPAN,NOP56,RCL1,NPM1,AIMP2,RRP12,PPRC1,TCOF1,MCM5,HK2,CBX3,PLK1,PHB,MCM4,CDK4,DUSP2,MYBBP1A,UTP20,PRMT3,FARSA,MAP3K6,LAS1L,PUS1,HSPE1,SLC29A2,DCTPP1,SUPV3L1,SORD,IMP4,GRWD1,UNG,MPHOSPH10
Monocyte	HALLMARK_MYOGENESIS	-0.01273	0.1217	-3.433	0.00133	Genes involved in development of skeletal muscle (myogenesis).	ACTA1,TNNI2,MYL1,TNNC1,TNNC2,MYH3,MYLPF,TNNT3,TNNT2,CASQ2,ACTC1,MYOM1,MYL4,MYBPH,MYH7,MYH8,ACTN2,TNNI1,CRYAB,SGCG,HRC,TNNT1,DES,MYOZ1,RYR1,CSRP3,ADAM12,ATP2A1,CKM,SVIL,MYOM2,MYL6B,TPM2,MYL2,CKMT2,BIN1,MYH1,ENO3,FLII,FXYD1,TPM3,DMD,IGFBP3,CHRNB1,SPEG,FHL1,ACTN3,TCAP,MYLK,MYL3,PYGM,LDB3,COX6A2,FABP3,MYL7,ITGB5,CHRNA1,SSPN,COL3A1,KCNH1,GJA5,MYF6,MYH2,MAPK12,PGAM2,MYOG,MYH4,AEBP1,HBEGF,MEF2C,NOS1,CNN…	ACTA1,TNNI2,MYL1,TNNC1,TNNC2,MYH3,MYLPF,TNNT3,TNNT2,CASQ2,ACTC1,MYOM1,MYL4,MYBPH,MYH7,MYH8,ACTN2,TNNI1,CRYAB,SGCG,HRC,TNNT1,DES,MYOZ1,RYR1,CSRP3,ADAM12,ATP2A1,CKM,SVIL,MYOM2,MYL6B,TPM2,MYL2,CKMT2,BIN1,MYH1,ENO3,FLII,FXYD1,TPM3,DMD,IGFBP3,CHRNB1,SPEG,FHL1,ACTN3,TCAP,MYLK,MYL3,PYGM,LDB3,COX6A2,FABP3,MYL7,ITGB5,CHRNA1,SSPN,COL3A1,KCNH1,GJA5,MYF6,MYH2,MAPK12,PGAM2,MYOG,MYH4,AEBP1,HBEGF,MEF2C,NOS1,CNN…
Monocyte	HALLMARK_OXIDATIVE_PHOSPHORYLATION	-0.01388	0.6073	-2.815	0.007323	Genes encoding proteins involved in oxidative phosphorylation.	NDUFS3,UQCRB,NDUFS2,SDHA,UQCRC1,NDUFA9,NDUFS4,NDUFS1,NDUFA2,NDUFS8,SDHB,NNT,ATP5O,ATP5G3,NDUFS7,ATP5A1,NDUFV1,COX5B,UQCRH,NDUFA1,ATP5C1,ATP5B,COX7B,SDHD,CYCS,NDUFA6,NDUFAB1,COX8A,ACO2,ATP5G1,CYC1,NDUFB6,ATP5E,COX5A,UQCRC2,COX6A1,ATP5D,COX6C,ATP5J,NDUFB3,IDH3B,OGDH,NDUFB8,SURF1,COX6B1,NDUFB5,NDUFA4,NDUFB1,COX4I1,COX7C,UQCRFS1,SDHC,ATP6V1F,COX7A2,SUCLG1,NDUFS6,NDUFA7,FH,NDUFV2,OXA1L,NDUFC1,UQCR11,N…	NDUFS3,UQCRB,NDUFS2,SDHA,UQCRC1,NDUFA9,NDUFS4,NDUFS1,NDUFA2,NDUFS8,SDHB,NNT,ATP5PO,ATP5MC3,NDUFS7,ATP5F1A,NDUFV1,COX5B,UQCRH,NDUFA1,ATP5F1C,ATP5F1B,COX7B,SDHD,CYCS,NDUFA6,NDUFAB1,COX8A,ACO2,ATP5MC1,CYC1,NDUFB6,ATP5F1E,COX5A,UQCRC2,COX6A1,ATP5F1D,COX6C,ATP5PF,NDUFB3,IDH3B,OGDH,NDUFB8,SURF1,COX6B1,NDUFB5,NDUFA4,NDUFB1,COX4I1,COX7C,UQCRFS1,SDHC,ATP6V1F,COX7A2,SUCLG1,NDUFS6,NDUFA7,FH,NDUFV2,OXA1L,NDU…
Eosinophil	HALLMARK_PANCREAS_BETA_CELLS	-0.01839	-0.2355	-2.735	0.01073	Genes specifically up-regulated in pancreatic beta cells.	PAX6,NEUROD1,ISL1,NKX2-2,PCSK1,NKX6-1,SLC2A2,SEC11A,DCX,SPCS1,FOXA2,GCK,MAFB,INS,PDX1,ABCC8,IAPP,SRP9,NEUROG3,FOXO1,AKT3,GCG,DPP4,PAX4,SYT13,SCGN,HNF1A,STXBP1,CHGA,VDR,PCSK2,INSM1,SST,ELP4,SRPRB,PAK3,G6PC2,PKLR,LMO2,SRP14	PAX6,NEUROD1,ISL1,NKX2-2,PCSK1,NKX6-1,SLC2A2,SEC11A,DCX,SPCS1,FOXA2,GCK,MAFB,INS,PDX1,ABCC8,IAPP,SRP9,NEUROG3,FOXO1,AKT3,GCG,DPP4,PAX4,SYT13,SCGN,HNF1A,STXBP1,CHGA,VDR,PCSK2,INSM1,SST,ELP4,SRPRB,PAK3,G6PC2,PKLR,LMO2,SRP14
Monocyte	HALLMARK_PEROXISOME	-0.01017	0.408	-3.814	0.0004317	Genes encoding components of peroxisome.	ABCD3,ACOT8,ACOX1,ACSL1,ECH1,ECI2,EHHADH,GSTK1,HSD17B4,MLYCD,PEX11A,RETSAT,SLC27A2,PEX13,PEX14,SCP2,HSD3B7,GNPAT,ABCD2,SLC25A17,PEX2,ACAA1,HAO2,HSD17B11,CRAT,PEX11B,LONP2,IDH1,FIS1,PEX6,ABCB4,SOD1,ABCB1,ISOC1,YWHAH,EPHX2,ABCD1,HMGCL,ACSL5,ALDH9A1,DHCR24,ELOVL5,NUDT19,PRDX5,CTPS,IDE,SLC23A2,PEX5,BCL10,NR1I2,TSPO,CNBP,MSH2,DHRS3,DIO1,SLC25A4,PRDX1,IDI1,HRAS,MVP,ABCC8,CLN6,CAT,ACSL4,IDH2,ABCC5,SOD2,…	ABCD3,ACOT8,ACOX1,ACSL1,ECH1,ECI2,EHHADH,GSTK1,HSD17B4,MLYCD,PEX11A,RETSAT,SLC27A2,PEX13,PEX14,SCP2,HSD3B7,GNPAT,ABCD2,SLC25A17,PEX2,ACAA1,HAO2,HSD17B11,CRAT,PEX11B,LONP2,IDH1,FIS1,PEX6,ABCB4,SOD1,ABCB1,ISOC1,YWHAH,EPHX2,ABCD1,HMGCL,ACSL5,ALDH9A1,DHCR24,ELOVL5,NUDT19,PRDX5,CTPS1,IDE,SLC23A2,PEX5,BCL10,NR1I2,TSPO,CNBP,MSH2,DHRS3,DIO1,SLC25A4,PRDX1,IDI1,HRAS,MVP,ABCC8,CLN6,CAT,ACSL4,IDH2,ABCC5,SOD2…
Neutrophil	HALLMARK_PI3K_AKT_MTOR_SIGNALING	-0.004933	0.5216	-2.107	0.04113	Genes up-regulated by activation of the PI3K/AKT/mTOR pathway.	MAPK8,PIK3R3,GRB2,NFKBIB,MAP2K6,MAPK9,AKT1,MAPK1,PLCG1,TRIB3,GSK3B,MAP2K3,CDKN1A,RAC1,RIPK1,AKT1S1,ACTR2,PRKAR2A,YWHAB,HRAS,PDK1,PIKFYVE,TBK1,ACTR3,E2F1,MYD88,ITPR2,SQSTM1,RPS6KA1,PTPN11,MAPKAP1,PLCB1,RAF1,CAMK4,RPTOR,CFL1,CDK4,TRAF2,GNGT1,UBE2N,ADCY2,CDKN1B,VAV3,FGF6,ECSIT,RALB,ARF1,MKNK1,CDK1,PTEN,ARHGDIA,ADRBK1,FGF17,DDIT3,IRAK4,TIAM1,CDK2,SFN,PRKCB,GNA14,EIF4E,CLTC,TSC2,FGF22,PPP1CA,DUSP3,HSP…	MAPK8,PIK3R3,GRB2,NFKBIB,MAP2K6,MAPK9,AKT1,MAPK1,PLCG1,TRIB3,GSK3B,MAP2K3,CDKN1A,RAC1,RIPK1,AKT1S1,ACTR2,PRKAR2A,YWHAB,HRAS,PDK1,PIKFYVE,TBK1,ACTR3,E2F1,MYD88,ITPR2,SQSTM1,RPS6KA1,PTPN11,MAPKAP1,PLCB1,RAF1,CAMK4,RPTOR,CFL1,CDK4,TRAF2,GNGT1,UBE2N,ADCY2,CDKN1B,VAV3,FGF6,ECSIT,RALB,ARF1,MKNK1,CDK1,PTEN,ARHGDIA,GRK2,FGF17,DDIT3,IRAK4,TIAM1,CDK2,SFN,PRKCB,GNA14,EIF4E,CLTC,TSC2,FGF22,PPP1CA,DUSP3,HSP90…
Monocyte	HALLMARK_REACTIVE_OXYGEN_SPECIES_PATHWAY	-0.009806	0.6121	-2.112	0.04056	Genes up-regulated by reactive oxigen species (ROS).	GSR,PRDX2,TXNRD1,SOD1,GCLC,CAT,GPX4,MPO,PRDX1,PRDX6,GCLM,TXN,SOD2,PRDX4,SELS,PDLIM1,TXNRD2,HBXIP,G6PD,MSRA,MBP,SRXN1,NQO1,OXSR1,GLRX2,HMOX2,FES,PFKP,NDUFB4,GPX3,SCAF4,CDKN2D,MGST1,ABCC1,FTL,ATOX1,STK25,EGLN2,ERCC2,SBNO2,JUNB,PPP2R4,LSP1,NDUFA6,HHEX,GLRX,NDUFS2,PRNP,IPCEF1	GSR,PRDX2,TXNRD1,SOD1,GCLC,CAT,GPX4,MPO,PRDX1,PRDX6,GCLM,TXN,SOD2,PRDX4,SELENOS,PDLIM1,TXNRD2,LAMTOR5,G6PD,MSRA,MBP,SRXN1,NQO1,OXSR1,GLRX2,HMOX2,FES,PFKP,NDUFB4,GPX3,SCAF4,CDKN2D,MGST1,ABCC1,FTL,ATOX1,STK25,EGLN2,ERCC2,SBNO2,JUNB,PTPA,LSP1,NDUFA6,HHEX,GLRX,NDUFS2,PRNP,IPCEF1
Eosinophil	HALLMARK_SPERMATOGENESIS	-0.01379	0.03303	-3.329	0.002456	Genes up-regulated during production of male gametes (sperm), as in spermatogenesis.	PDHA2,TSSK2,TNP1,ZPBP,DPEP3,ADAM2,ACTL7B,GAPDHS,TUBA3C,LDHC,DDX25,PRM2,TCP11,PIAS2,PAPOLB,OAZ3,PHF7,ODF1,ACRBP,YBX2,CSNK2A2,NAA11,TULP2,ADAD1,SYCP1,DDX4,MLF1,TEKT2,SPATA6,PGK2,HSPA2,ACRV1,CLPB,CRISP2,FAM164C,AKAP4,CCNA1,CCT6B,PACRG,GSG1,THEG,HSPA4L,CST8,DCC,HSPA1L,GSTM3,DNAJB8,IL13RA2,CAMK4,LPIN1,ZC3H14,COIL,PHKG2,KIF2C,RPL39L,SLC2A5,PCSK4,AURKA,MLLT10,NOS1,ART3,CCNB2,NPHP1,CLGN,MAST2,MTOR,CDKN3,…	PDHA2,TSSK2,TNP1,ZPBP,DPEP3,ADAM2,ACTL7B,GAPDHS,TUBA3C,LDHC,DDX25,PRM2,TCP11,PIAS2,PAPOLB,OAZ3,PHF7,ODF1,ACRBP,YBX2,CSNK2A2,NAA11,TULP2,ADAD1,SYCP1,DDX4,MLF1,TEKT2,SPATA6,PGK2,HSPA2,ACRV1,CLPB,CRISP2,ZC2HC1C,AKAP4,CCNA1,CCT6B,PACRG,GSG1,THEG,HSPA4L,CST8,DCC,HSPA1L,GSTM3,DNAJB8,IL13RA2,CAMK4,LPIN1,ZC3H14,COIL,PHKG2,KIF2C,RPL39L,SLC2A5,PCSK4,AURKA,MLLT10,NOS1,ART3,CCNB2,NPHP1,CLGN,MAST2,MTOR,CDKN3,…
Monocyte	HALLMARK_WNT_BETA_CATENIN_SIGNALING	-0.01378	0.362	-3.019	0.004257	Genes up-regulated by activation of WNT signaling through accumulation of beta catenin CTNNB1 [GeneID=1499].	MYC,CTNNB1,JAG2,NOTCH1,DLL1,AXIN2,PSEN2,FZD1,NOTCH4,LEF1,AXIN1,NKD1,WNT5B,CUL1,JAG1,MAML1,KAT2A,GNAI1,WNT6,PTCH1,NCOR2,DKK4,HDAC2,DKK1,TCF7,WNT1,NUMB,ADAM17,DVL2,PPARD,NCSTN,HDAC5,CCND2,FRAT1,CSNK1E,RBPJ,FZD8,TP53,SKP2,HEY2,HEY1,HDAC11	MYC,CTNNB1,JAG2,NOTCH1,DLL1,AXIN2,PSEN2,FZD1,NOTCH4,LEF1,AXIN1,NKD1,WNT5B,CUL1,JAG1,MAML1,KAT2A,GNAI1,WNT6,PTCH1,NCOR2,DKK4,HDAC2,DKK1,TCF7,WNT1,NUMB,ADAM17,DVL2,PPARD,NCSTN,HDAC5,CCND2,FRAT1,CSNK1E,RBPJ,FZD8,TP53,SKP2,HEY2,HEY1,HDAC11
Monocyte	HALLMARK_XENOBIOTIC_METABOLISM	-0.01382	0.2743	-4.437	6.235e-05	Genes encoding proteins involved in processing of drugs and other xenobiotics.	CYP1A1,FAH,DCXR,CYP1A2,GSTA3,CYP2J2,CYP27A1,ADH1C,UGDH,ASL,NQO1,ALAS1,GSTM4,CYP2C18,PTS,CYB5A,ACOX2,EPHX1,LCAT,SLC35D1,GSS,FMO3,IDH1,AKR1C3,SLC22A1,GSTO1,ARG1,CDO1,FMO1,ALDH9A1,POR,NDRG2,UPB1,ECH1,PTGES,PDK4,AHCY,COMT,AOX1,CFB,DDAH2,HGFAC,F11,CYP26A1,MCCC2,SERPINA6,GNMT,BLVRB,HACL1,MAOA,KYNU,DHPS,SERPINE1,SLC6A12,GCH1,DHRS7,PAPSS2,ALDH2,HSD11B1,SLC35B1,KARS,CA2,LPIN2,CAT,CYP2S1,RAP1GAP,FBP1,RBP4,…	CYP1A1,FAH,DCXR,CYP1A2,GSTA3,CYP2J2,CYP27A1,ADH1C,UGDH,ASL,NQO1,ALAS1,GSTM4,CYP2C18,PTS,CYB5A,ACOX2,EPHX1,LCAT,SLC35D1,GSS,FMO3,IDH1,AKR1C3,SLC22A1,GSTO1,ARG1,CDO1,FMO1,ALDH9A1,POR,NDRG2,UPB1,ECH1,PTGES,PDK4,AHCY,COMT,AOX1,CFB,DDAH2,HGFAC,F11,CYP26A1,MCCC2,SERPINA6,GNMT,BLVRB,HACL1,MAOA,KYNU,DHPS,SERPINE1,SLC6A12,GCH1,DHRS7,PAPSS2,ALDH2,HSD11B1,SLC35B1,KARS1,CA2,LPIN2,CAT,CYP2S1,RAP1GAP,FBP1,RBP4…
