# Supplementary material for: Innate biosignature of treatment failure in human cutaneous leishmaniasis
Source: Research Square preprint supplement (doi:10.21203/rs.3.rs-4271873/v1), 2024-05-02
Supplement: Supplementary file 6 [file 7e9fd15e4ce7069a3961ed3c.xlsx]

## Sheet: Table S1
Table S1. Clinical, sociodemographic and parasitologic characteristics of study participants
Table S1a - Tumaco and Cali					Table S1b - Tumaco					Table S1c - Cali
						Tumaco					Cali
Characteristic	Cure, N = 19a	TF, N = 10a	p-value		Characteristic	Cure, N = 10a	Failure, N = 9a	p-value1		Characteristic	Cure, N = 9a	Failure, N = 1a	p-value1
Sex			0.6 1		Sex			0.6		Sex			>0.9
Male	15 (62.5%)	9 (37.5%)			Male	7 (46.6%)	8 (53.3%)			Male	8 (88.8%)	1 (11.1%)
Female	4 (80%)	1 (20%)			Female	3 (75.0%)	1 (25.0%)			Female	1 (100.0%)
Ethnicity			0.002 1		Ethnicity			0.03		Ethnicity			0.2
Afrocolombian	5 (35.7%)	9 (64.2%)			Afrocolombian	4 (33.3%)	8 (66.6%)			Afrocolombian	1 (50.0%)	1 (50.0%)
Indigenous	4 (80%)	1 (20%)			Indigenous	1 (50%)	1 (50%)			Indigenous	3 (100.0%)
Mixed	10 (100%)				Mixed	5 (100%)				Mixed	5 (100.0%)
Age, years	34 (28.5, 37)	25 (23.2, 26.7)	0.01 2		Age, years	28.5 (22.7, 34.7)	25 (23, 26)	0.2		Age, years	36 (33, 37)	28 (28, 28)	0.2
Living area in Colombia			0.4 1		Living area in Colombia			>0.9		Living area in Colombia			>0.9
Cauca	5 (83.3%)	1 (16.6%)			Narino	9 (50%)	9 (50%)			Narino	5 (83.3%)	1 (16.6%)
Narino	11 (55%)	9 (45%)			Tolima	1 (100%)				Tolima	2 (100.0%)
Other	3 (100%)				Other					Other	2 (100.0%)
Weight, kg	72 (58.4, 80.6)	77.5 (64, 83.3)	0.2 2		Weight, kg	58.8 (58.1, 66.9)	78 (63, 83.4)	0.02		Weight, kg	77 (75, 87)	67 (67, 67)	0.4
Body mass index	25.8 (23.3, 29.2)	25.6 (22.8, 28.6)	>0.9 2		Body mass index	23.7 (21.6, 25.6)	26.3 (24.8, 28.9)	0.2		Body mass index	29.4 (26.2, 29.9)	22.1 (22.1, 22.1)	0.2
Time of lesion evolution, weeks	7 (4, 15)	4 (4, 5)	0.2 2		Time of lesion evolution, weeks	4.0 (3.7, 15.0)	4.0 (4.0, 5.0)	0.8		Time of lesion evolution, weeks	11 (6, 15)
No data	2	1			No data	2	0			No data	0	1
Number of active lesions	1 (1, 2)	2.50 (1, 3.75)	0.2 2		Number of active lesions	2 (1, 3)	3 (1, 4)	0.4		Number of active lesions	1 (1.0, 1.2)	1 (1, 1)	0.8
No data	2				No data	1	0			No data	1	0
Type of lesion			0.4 1		Type of lesion			>0.9		Type of lesion			>0.9
Ulcer	16 (64%)	9 (36%)			Ulcer	8 (50%)	8 (50%)			Ulcer	8 (88.8%)	1(11.1%)
Plaque	2 (100%)				Plaque	1 (100%)				Plaque	1 (100%)
Scar with active border	1 (100%)				Scar with active border	1 (100%)				Scar with active border
Other		1 (100%)			Other		1 (100%)			Other
Leishmania species			0.8 1		Leishmania species			0.4		Leishmania species			>0.9
L. (V) braziliensis	3 (75%)	1 (25%)			L. (V) guyanesis	1 (100%)				L. (V) guyanesis	3 (75%)	1 (25%)
L. (V) guyanesis	1 (100%)				L. (V) panamensis	6 (40%)	9 (60%)			L. (V) panamensis	4 (100%)
L. (V) panamensis	10 (52.6%)	9 (47.3%)			No data	3	0			No data	2	0
No data	5				Antileishmanial treatment					Antileishmanial treatment
Antileishmanial treatment					Glucantime dose, mg/kg	19.4 (19.2, 19.5)	19.4 (19.2, 19.6)	>0.9		Glucantime dose, mg/kg	19.5 (18.6, 19.9)	19.9 (19.9, 19.9)	0.8
Glucantime dose, mg/kg	19.4 (19.1, 19.6)	19.4 (19.3, 19.7)	0.8 2		Participants with adverse drug reactions	10 (52.6%)	9 (47.3%)			Participants with adverse drug reactions	9 (90.0%)	1 (10%)
Participants with adverse drug reactions	19 (67.8%)	9 (32.1%)	0.3 1		Percentage of adherence to treatment	100 (0)	99.4 (1.6)	0.3		Percentage of adherence to treatment	99.5 (0.8)	100 (0)	0.8
Percentage of adherence to treatment	99.8 (0.6)	99.5 (1.58)	>0.9 3		a n (%); Median (IQR); Mean (SD)					a n (%); Median (IQR); Mean (SD)
					1 Fisher's exact test, Wilcoxon rank sum exact test					1 Fisher's exact test, Wilcoxon rank sum exact test
a n (%); Median (IQR); Mean (SD)
1 Fisher's exact test
2 Wilcoxon rank sum exact test
3 Wilcoxon rank sum test
