# Supplementary material for: Innate biosignature of treatment failure in human cutaneous leishmaniasis
Source: Research Square preprint supplement (doi:10.21203/rs.3.rs-4271873/v1), 2024-05-02
Supplement: Supplementary file 7 [file b23eef61b5bd221ed94cae5a.xlsx]

## Sheet: Biopsies DE
Table S4a. Differential expression analysis of lesion biopsies. Contrast numerator: TF. Contrast denominator: Cure.
ensemblgeneid	hgncsymbol	description	genebiotype	deseq_logfc	deseq_adjp	edger_logfc	edger_adjp	limma_logfc	limma_adjp
ENSG00000000003	TSPAN6	tetraspanin 6 [Source:HGNC Symbol;Acc:HGNC:11858]	protein_coding	-0.5211	0.615	-0.4989	0.9324	-0.4069	0.6933
ENSG00000000419	DPM1	dolichyl-phosphate mannosyltransferase subunit 1, catalytic [Source:HGNC Symbol;Acc:HGNC:3005]	protein_coding	0.008558	0.9977	0.03115	0.9995	0.03598	0.9768
ENSG00000000457	SCYL3	SCY1 like pseudokinase 3 [Source:HGNC Symbol;Acc:HGNC:19285]	protein_coding	0.1169	0.9089	0.1469	0.9995	0.09407	0.8726
ENSG00000000460	C1orf112	chromosome 1 open reading frame 112 [Source:HGNC Symbol;Acc:HGNC:25565]	protein_coding	0.1008	0.9612	0.1259	0.9995	0.08952	0.9372
ENSG00000000938	FGR	FGR proto-oncogene, Src family tyrosine kinase [Source:HGNC Symbol;Acc:HGNC:3697]	protein_coding	0.611	0.6468	0.6289	0.8119	0.6886	0.6431
ENSG00000000971	CFH	complement factor H [Source:HGNC Symbol;Acc:HGNC:4883]	protein_coding	0.1915	0.8994	0.2131	0.9995	0.1699	0.8399
ENSG00000001036	FUCA2	alpha-L-fucosidase 2 [Source:HGNC Symbol;Acc:HGNC:4008]	protein_coding	-0.05532	0.9661	-0.03794	0.9995	-0.07164	0.9148
ENSG00000001084	GCLC	glutamate-cysteine ligase catalytic subunit [Source:HGNC Symbol;Acc:HGNC:4311]	protein_coding	-0.4611	0.6888	-0.4381	0.9642	-0.4066	0.6997
ENSG00000001167	NFYA	nuclear transcription factor Y subunit alpha [Source:HGNC Symbol;Acc:HGNC:7804]	protein_coding	0.1835	0.8882	0.2041	0.9995	0.2005	0.7873
ENSG00000001460	STPG1	sperm tail PG-rich repeat containing 1 [Source:HGNC Symbol;Acc:HGNC:28070]	protein_coding	-0.1045	0.9643	-0.09573	0.9995	0.05002	0.9752
ENSG00000001461	NIPAL3	NIPA like domain containing 3 [Source:HGNC Symbol;Acc:HGNC:25233]	protein_coding	0.08779	0.9211	0.1061	0.9995	0.09995	0.8459
ENSG00000001497	LAS1L	LAS1 like ribosome biogenesis factor [Source:HGNC Symbol;Acc:HGNC:25726]	protein_coding	-0.00791	0.9947	0.008146	0.9996	0.00374	0.9948
ENSG00000001561	ENPP4	ectonucleotide pyrophosphatase/phosphodiesterase 4 [Source:HGNC Symbol;Acc:HGNC:3359]	protein_coding	-0.19	0.9385	-0.1658	0.9995	-0.2283	0.876
ENSG00000001617	SEMA3F	semaphorin 3F [Source:HGNC Symbol;Acc:HGNC:10728]	protein_coding	0.4653	0.7424	0.4807	0.9753	0.4556	0.6858
ENSG00000001626	CFTR	CF transmembrane conductance regulator [Source:HGNC Symbol;Acc:HGNC:1884]	protein_coding	0.7551	0.8499	0.7759	0.9995	0.6112	0.8325
ENSG00000001629	ANKIB1	ankyrin repeat and IBR domain containing 1 [Source:HGNC Symbol;Acc:HGNC:22215]	protein_coding	-0.05003	0.9606	-0.03108	0.9995	-0.04431	0.9382
ENSG00000002016	RAD52	RAD52 homolog, DNA repair protein [Source:HGNC Symbol;Acc:HGNC:9824]	protein_coding	0.08742	0.9524	0.1122	0.9995	0.07011	0.9306
ENSG00000002330	BAD	BCL2 associated agonist of cell death [Source:HGNC Symbol;Acc:HGNC:936]	protein_coding	0.04012	0.9852	0.06496	0.9995	0.03702	0.9764
ENSG00000002549	LAP3	leucine aminopeptidase 3 [Source:HGNC Symbol;Acc:HGNC:18449]	protein_coding	0.3576	0.675	0.3791	0.9995	0.5236	0.5217
ENSG00000002586	CD99	CD99 molecule (Xg blood group) [Source:HGNC Symbol;Acc:HGNC:7082]	protein_coding	0.08726	0.948	0.1041	0.9995	0.05154	0.9531
ENSG00000002587	HS3ST1	heparan sulfate-glucosamine 3-sulfotransferase 1 [Source:HGNC Symbol;Acc:HGNC:5194]	protein_coding	0.4145	0.8874	0.4326	0.9995	0.8507	0.6933
ENSG00000002726	AOC1	amine oxidase copper containing 1 [Source:HGNC Symbol;Acc:HGNC:80]	protein_coding	0.3308	0.9378	0.3276	0.9995	-0.6644	0.7869
ENSG00000002745	WNT16	Wnt family member 16 [Source:HGNC Symbol;Acc:HGNC:16267]	protein_coding	-0.005982	0.9992	0.007019	0.9996	-0.4419	0.8339
ENSG00000002746	HECW1	HECT, C2 and WW domain containing E3 ubiquitin protein ligase 1 [Source:HGNC Symbol;Acc:HGNC:22195]	protein_coding	-0.8325	0.8151	-0.8082	0.9995	-1.059	0.6997
ENSG00000002834	LASP1	LIM and SH3 protein 1 [Source:HGNC Symbol;Acc:HGNC:6513]	protein_coding	0.347	0.6074	0.3635	0.9995	0.3538	0.6786
ENSG00000002919	SNX11	sorting nexin 11 [Source:HGNC Symbol;Acc:HGNC:14975]	protein_coding	0.194	0.8909	0.2141	0.9995	0.2262	0.7899
ENSG00000002933	TMEM176A	transmembrane protein 176A [Source:HGNC Symbol;Acc:HGNC:24930]	protein_coding	-0.4205	0.8854	-0.4059	0.9995	-0.4805	0.7931
ENSG00000003056	M6PR	mannose-6-phosphate receptor, cation dependent [Source:HGNC Symbol;Acc:HGNC:6752]	protein_coding	0.04661	0.9643	0.06729	0.9995	0.06491	0.9135
ENSG00000003137	CYP26B1	cytochrome P450 family 26 subfamily B member 1 [Source:HGNC Symbol;Acc:HGNC:20581]	protein_coding	0.6126	0.7272	0.6314	0.9673	0.6024	0.6979
ENSG00000003147	ICA1	islet cell autoantigen 1 [Source:HGNC Symbol;Acc:HGNC:5343]	protein_coding	0.4124	0.8598	0.4347	0.9995	0.3605	0.8177
ENSG00000003249	DBNDD1	dysbindin domain containing 1 [Source:HGNC Symbol;Acc:HGNC:28455]	protein_coding	-0.01737	0.9962	-0.005067	0.9996	0.2235	0.9146
ENSG00000003393	ALS2	alsin Rho guanine nucleotide exchange factor ALS2 [Source:HGNC Symbol;Acc:HGNC:443]	protein_coding	-0.08098	0.939	-0.06195	0.9995	-0.05807	0.9309
ENSG00000003400	CASP10	caspase 10 [Source:HGNC Symbol;Acc:HGNC:1500]	protein_coding	-0.08842	0.9612	-0.06951	0.9995	-0.059	0.9558
ENSG00000003402	CFLAR	CASP8 and FADD like apoptosis regulator [Source:HGNC Symbol;Acc:HGNC:1876]	protein_coding	0.1821	0.86	0.2028	0.9995	0.2365	0.6993
ENSG00000003436	TFPI	tissue factor pathway inhibitor [Source:HGNC Symbol;Acc:HGNC:11760]	protein_coding	-0.2334	0.8994	-0.2108	0.9995	-0.2157	0.8478
ENSG00000003509	NDUFAF7	NADH:ubiquinone oxidoreductase complex assembly factor 7 [Source:HGNC Symbol;Acc:HGNC:28816]	protein_coding	-0.04493	0.977	-0.007511	0.9996	-0.1138	0.8694
ENSG00000003756	RBM5	RNA binding motif protein 5 [Source:HGNC Symbol;Acc:HGNC:9902]	protein_coding	-0.02486	0.9787	-0.004045	0.9996	-0.00229	0.9976
ENSG00000003987	MTMR7	myotubularin related protein 7 [Source:HGNC Symbol;Acc:HGNC:7454]	protein_coding	-0.8578	0.6888	-0.8227	0.9753	-0.8701	0.6479
ENSG00000003989	SLC7A2	solute carrier family 7 member 2 [Source:HGNC Symbol;Acc:HGNC:11060]	protein_coding	-1.123	0.3065	-1.098	0.4259	-0.8612	0.5755
ENSG00000004139	SARM1	sterile alpha and TIR motif containing 1 [Source:HGNC Symbol;Acc:HGNC:17074]	protein_coding	0.2686	0.9181	0.2792	0.9995	0.5054	0.7262
ENSG00000004142	POLDIP2	DNA polymerase delta interacting protein 2 [Source:HGNC Symbol;Acc:HGNC:23781]	protein_coding	0.08981	0.923	0.1059	0.9995	0.07842	0.8953
ENSG00000004399	PLXND1	plexin D1 [Source:HGNC Symbol;Acc:HGNC:9107]	protein_coding	-0.04226	0.9843	-0.02585	0.9995	-0.1033	0.934
ENSG00000004455	AK2	adenylate kinase 2 [Source:HGNC Symbol;Acc:HGNC:362]	protein_coding	0.00175	0.9992	0.0234	0.9995	0.03729	0.9564
ENSG00000004468	CD38	CD38 molecule [Source:HGNC Symbol;Acc:HGNC:1667]	protein_coding	0.05389	0.9809	0.0785	0.9995	0.09982	0.936
ENSG00000004478	FKBP4	FKBP prolyl isomerase 4 [Source:HGNC Symbol;Acc:HGNC:3720]	protein_coding	0.3197	0.8119	0.3358	0.9995	0.373	0.7035
ENSG00000004487	KDM1A	lysine demethylase 1A [Source:HGNC Symbol;Acc:HGNC:29079]	protein_coding	0.07156	0.929	0.08462	0.9995	0.07366	0.8819
ENSG00000004534	RBM6	RNA binding motif protein 6 [Source:HGNC Symbol;Acc:HGNC:9903]	protein_coding	0.03448	0.9787	0.05404	0.9995	0.06178	0.933
ENSG00000004660	CAMKK1	calcium/calmodulin dependent protein kinase kinase 1 [Source:HGNC Symbol;Acc:HGNC:1469]	protein_coding	-0.467	0.7358	-0.4502	0.9995	-0.2264	0.8457
ENSG00000004700	RECQL	RecQ like helicase [Source:HGNC Symbol;Acc:HGNC:9948]	protein_coding	-0.03754	0.9814	-0.01651	0.9995	-0.02851	0.9768
ENSG00000004766	VPS50	VPS50 subunit of EARP/GARPII complex [Source:HGNC Symbol;Acc:HGNC:25956]	protein_coding	-0.05226	0.9797	-0.03149	0.9995	-0.1462	0.8757
ENSG00000004776	HSPB6	heat shock protein family B (small) member 6 [Source:HGNC Symbol;Acc:HGNC:26511]	protein_coding	-0.5935	0.8386	-0.5736	0.9995	-0.1722	0.9351
ENSG00000004777	ARHGAP33	Rho GTPase activating protein 33 [Source:HGNC Symbol;Acc:HGNC:23085]	protein_coding	0.2794	0.7725	0.3	0.9995	0.3284	0.6786
ENSG00000004779	NDUFAB1	NADH:ubiquinone oxidoreductase subunit AB1 [Source:HGNC Symbol;Acc:HGNC:7694]	protein_coding	0.1186	0.9244	0.1388	0.9995	0.1438	0.8432
ENSG00000004799	PDK4	pyruvate dehydrogenase kinase 4 [Source:HGNC Symbol;Acc:HGNC:8812]	protein_coding	-1.302	0.8412	-1.25	0.9995	-0.4098	0.9153
ENSG00000004838	ZMYND10	zinc finger MYND-type containing 10 [Source:HGNC Symbol;Acc:HGNC:19412]	protein_coding	0.1746	0.9612	0.1917	0.9995	0.1868	0.9192
ENSG00000004864	SLC25A13	solute carrier family 25 member 13 [Source:HGNC Symbol;Acc:HGNC:10983]	protein_coding	0.1039	0.9081	0.1162	0.9995	0.1279	0.8154
ENSG00000004866	ST7	suppression of tumorigenicity 7 [Source:HGNC Symbol;Acc:HGNC:11351]	protein_coding	-0.1435	0.9089	-0.1241	0.9995	-0.1184	0.8694
ENSG00000004897	CDC27	cell division cycle 27 [Source:HGNC Symbol;Acc:HGNC:1728]	protein_coding	-0.05171	0.9724	-0.03018	0.9995	-0.03873	0.9611
ENSG00000004961	HCCS	holocytochrome c synthase [Source:HGNC Symbol;Acc:HGNC:4837]	protein_coding	0.1839	0.8909	0.2094	0.9995	0.1648	0.841
ENSG00000004975	DVL2	dishevelled segment polarity protein 2 [Source:HGNC Symbol;Acc:HGNC:3086]	protein_coding	0.06547	0.963	0.0794	0.9995	0.1279	0.8619
ENSG00000005001	PRSS22	serine protease 22 [Source:HGNC Symbol;Acc:HGNC:14368]	protein_coding	0.2086	0.9524	0.2326	0.9995	0.6549	0.8154
ENSG00000005007	UPF1	UPF1 RNA helicase and ATPase [Source:HGNC Symbol;Acc:HGNC:9962]	protein_coding	0.09166	0.9378	0.1075	0.9995	0.08684	0.9086
ENSG00000005020	SKAP2	src kinase associated phosphoprotein 2 [Source:HGNC Symbol;Acc:HGNC:15687]	protein_coding	-0.006445	0.9971	0.0131	0.9996	0.01978	0.9803
ENSG00000005022	SLC25A5	solute carrier family 25 member 5 [Source:HGNC Symbol;Acc:HGNC:10991]	protein_coding	-0.09624	0.9244	-0.07563	0.9995	-0.05306	0.9392
ENSG00000005059	MCUB	mitochondrial calcium uniporter dominant negative beta subunit [Source:HGNC Symbol;Acc:HGNC:26076]	protein_coding	0.005591	0.9987	0.02703	0.9995	0.04854	0.9616
ENSG00000005073	HOXA11	homeobox A11 [Source:HGNC Symbol;Acc:HGNC:5101]	protein_coding	-1.788	0.1802	-1.742	0.2661	-1.546	0.5217
ENSG00000005075	POLR2J	RNA polymerase II subunit J [Source:HGNC Symbol;Acc:HGNC:9197]	protein_coding	0.3057	0.675	0.3269	0.987	0.2994	0.6786
ENSG00000005100	DHX33	DEAH-box helicase 33 [Source:HGNC Symbol;Acc:HGNC:16718]	protein_coding	-0.09733	0.9606	-0.09048	0.9995	0.0504	0.9617
ENSG00000005102	MEOX1	mesenchyme homeobox 1 [Source:HGNC Symbol;Acc:HGNC:7013]	protein_coding	0.1124	0.9612	0.1325	0.9995	0.1012	0.9435
ENSG00000005108	THSD7A	thrombospondin type 1 domain containing 7A [Source:HGNC Symbol;Acc:HGNC:22207]	protein_coding	-0.5782	0.7721	-0.5563	0.9995	-0.2765	0.841
ENSG00000005156	LIG3	DNA ligase 3 [Source:HGNC Symbol;Acc:HGNC:6600]	protein_coding	0.1461	0.9081	0.1623	0.9995	0.195	0.7764
ENSG00000005175	RPAP3	RNA polymerase II associated protein 3 [Source:HGNC Symbol;Acc:HGNC:26151]	protein_coding	0.007282	0.9982	0.0296	0.9995	-0.01318	0.9919
ENSG00000005187	ACSM3	acyl-CoA synthetase medium chain family member 3 [Source:HGNC Symbol;Acc:HGNC:10522]	protein_coding	-0.7284	0.8168	-0.7018	0.9995	-0.3473	0.8423
ENSG00000005194	CIAPIN1	cytokine induced apoptosis inhibitor 1 [Source:HGNC Symbol;Acc:HGNC:28050]	protein_coding	0.08895	0.8966	0.1067	0.9995	0.1033	0.8272
ENSG00000005206	SPPL2B	signal peptide peptidase like 2B [Source:HGNC Symbol;Acc:HGNC:30627]	protein_coding	0.1013	0.9351	0.1189	0.9995	0.1195	0.8694
ENSG00000005238	FAM214B	family with sequence similarity 214 member B [Source:HGNC Symbol;Acc:HGNC:25666]	protein_coding	0.3159	0.8256	0.3321	0.9995	0.3823	0.703
ENSG00000005243	COPZ2	coatomer protein complex subunit zeta 2 [Source:HGNC Symbol;Acc:HGNC:19356]	protein_coding	-0.3608	0.675	-0.3494	0.9995	-0.2807	0.7228
ENSG00000005249	PRKAR2B	protein kinase cAMP-dependent type II regulatory subunit beta [Source:HGNC Symbol;Acc:HGNC:9392]	protein_coding	-0.3631	0.8296	-0.3367	0.9995	-0.2661	0.8325
ENSG00000005302	MSL3	MSL complex subunit 3 [Source:HGNC Symbol;Acc:HGNC:7370]	protein_coding	0.01402	0.9904	0.0379	0.9995	0.0372	0.9548
ENSG00000005339	CREBBP	CREB binding protein [Source:HGNC Symbol;Acc:HGNC:2348]	protein_coding	0.03945	0.9805	0.0566	0.9995	0.03554	0.9676
ENSG00000005379	TSPOAP1	TSPO associated protein 1 [Source:HGNC Symbol;Acc:HGNC:16831]	protein_coding	0.06316	0.9787	0.08173	0.9995	0.1082	0.936
ENSG00000005381	MPO	myeloperoxidase [Source:HGNC Symbol;Acc:HGNC:7218]	protein_coding	-0.1501	0.9661	-0.1347	0.9995	0.04423	0.982
ENSG00000005436	GCFC2	GC-rich sequence DNA-binding factor 2 [Source:HGNC Symbol;Acc:HGNC:1317]	protein_coding	-0.3138	0.8458	-0.2913	0.9995	-0.2494	0.8086
ENSG00000005448	WDR54	WD repeat domain 54 [Source:HGNC Symbol;Acc:HGNC:25770]	protein_coding	0.3432	0.7886	0.3634	0.9995	0.2913	0.7617
ENSG00000005469	CROT	carnitine O-octanoyltransferase [Source:HGNC Symbol;Acc:HGNC:2366]	protein_coding	-0.2241	0.8965	-0.2034	0.9995	-0.2391	0.8215
ENSG00000005471	ABCB4	ATP binding cassette subfamily B member 4 [Source:HGNC Symbol;Acc:HGNC:45]	protein_coding	-0.1427	0.9583	-0.1249	0.9995	-0.06705	0.9668
ENSG00000005483	KMT2E	lysine methyltransferase 2E [Source:HGNC Symbol;Acc:HGNC:18541]	protein_coding	-0.1168	0.934	-0.09674	0.9995	-0.08203	0.9223
ENSG00000005486	RHBDD2	rhomboid domain containing 2 [Source:HGNC Symbol;Acc:HGNC:23082]	protein_coding	0.1188	0.9466	0.1368	0.9995	0.1594	0.8694
ENSG00000005700	IBTK	inhibitor of Bruton tyrosine kinase [Source:HGNC Symbol;Acc:HGNC:17853]	protein_coding	-0.113	0.9341	-0.0915	0.9995	-0.09535	0.9008
ENSG00000005801	ZNF195	zinc finger protein 195 [Source:HGNC Symbol;Acc:HGNC:12986]	protein_coding	-0.09163	0.939	-0.07205	0.9995	-0.06388	0.9309
ENSG00000005810	MYCBP2	MYC binding protein 2 [Source:HGNC Symbol;Acc:HGNC:23386]	protein_coding	-0.3976	0.761	-0.3787	0.9995	-0.3456	0.7429
ENSG00000005844	ITGAL	integrin subunit alpha L [Source:HGNC Symbol;Acc:HGNC:6148]	protein_coding	0.177	0.9143	0.196	0.9995	0.21	0.841
ENSG00000005882	PDK2	pyruvate dehydrogenase kinase 2 [Source:HGNC Symbol;Acc:HGNC:8810]	protein_coding	0.05683	0.9805	0.06917	0.9995	0.2769	0.7964
ENSG00000005884	ITGA3	integrin subunit alpha 3 [Source:HGNC Symbol;Acc:HGNC:6139]	protein_coding	0.5993	0.8148	0.612	0.9995	0.4779	0.7936
ENSG00000005889	ZFX	zinc finger protein X-linked [Source:HGNC Symbol;Acc:HGNC:12869]	protein_coding	-0.1695	0.9181	-0.1501	0.9995	-0.2021	0.8346
ENSG00000005893	LAMP2	lysosomal associated membrane protein 2 [Source:HGNC Symbol;Acc:HGNC:6501]	protein_coding	-0.2473	0.8129	-0.2267	0.9995	-0.2456	0.7287
ENSG00000006007	GDE1	glycerophosphodiester phosphodiesterase 1 [Source:HGNC Symbol;Acc:HGNC:29644]	protein_coding	-0.2164	0.6784	-0.2002	0.9995	-0.2218	0.6786
ENSG00000006016	CRLF1	cytokine receptor like factor 1 [Source:HGNC Symbol;Acc:HGNC:2364]	protein_coding	-0.8997	0.7783	-0.8759	0.9995	-0.7716	0.7548
ENSG00000006025	OSBPL7	oxysterol binding protein like 7 [Source:HGNC Symbol;Acc:HGNC:16387]	protein_coding	0.1664	0.8874	0.1924	0.9995	0.1505	0.8249
ENSG00000006042	TMEM98	transmembrane protein 98 [Source:HGNC Symbol;Acc:HGNC:24529]	protein_coding	-0.004473	0.9992	0.01113	0.9996	0.1727	0.875
ENSG00000006062	MAP3K14	mitogen-activated protein kinase kinase kinase 14 [Source:HGNC Symbol;Acc:HGNC:6853]	protein_coding	0.1841	0.8874	0.2013	0.9995	0.2066	0.7843
ENSG00000006118	TMEM132A	transmembrane protein 132A [Source:HGNC Symbol;Acc:HGNC:31092]	protein_coding	0.5544	0.8497	0.5696	0.9995	0.7936	0.6979
ENSG00000006125	AP2B1	adaptor related protein complex 2 subunit beta 1 [Source:HGNC Symbol;Acc:HGNC:563]	protein_coding	0.2587	0.8261	0.275	0.9995	0.2625	0.7405
ENSG00000006194	ZNF263	zinc finger protein 263 [Source:HGNC Symbol;Acc:HGNC:13056]	protein_coding	-0.09968	0.8936	-0.0747	0.9995	-0.08563	0.8551
ENSG00000006210	CX3CL1	C-X3-C motif chemokine ligand 1 [Source:HGNC Symbol;Acc:HGNC:10647]	protein_coding	0.7537	0.6376	0.7722	0.8679	0.6251	0.6972
ENSG00000006282	SPATA20	spermatogenesis associated 20 [Source:HGNC Symbol;Acc:HGNC:26125]	protein_coding	0.2516	0.905	0.2655	0.9995	0.256	0.8392
ENSG00000006327	TNFRSF12A	TNF receptor superfamily member 12A [Source:HGNC Symbol;Acc:HGNC:18152]	protein_coding	0.6351	0.6738	0.6482	0.8419	0.7194	0.6623
ENSG00000006432	MAP3K9	mitogen-activated protein kinase kinase kinase 9 [Source:HGNC Symbol;Acc:HGNC:6861]	protein_coding	-0.5124	0.7511	-0.4908	0.9995	-0.3	0.826
ENSG00000006451	RALA	RAS like proto-oncogene A [Source:HGNC Symbol;Acc:HGNC:9839]	protein_coding	0.3119	0.7952	0.3307	0.9995	0.3441	0.6972
ENSG00000006453	BAIAP2L1	BAR/IMD domain containing adaptor protein 2 like 1 [Source:HGNC Symbol;Acc:HGNC:21649]	protein_coding	-0.6505	0.3636	-0.6312	0.4608	-0.7141	0.5384
ENSG00000006459	KDM7A	lysine demethylase 7A [Source:HGNC Symbol;Acc:HGNC:22224]	protein_coding	-0.136	0.9208	-0.1139	0.9995	-0.1051	0.8898
ENSG00000006468	ETV1	ETS variant transcription factor 1 [Source:HGNC Symbol;Acc:HGNC:3490]	protein_coding	-0.1523	0.9524	-0.1358	0.9995	0.1004	0.9548
ENSG00000006530	AGK	acylglycerol kinase [Source:HGNC Symbol;Acc:HGNC:21869]	protein_coding	0.0177	0.9902	0.04124	0.9995	0.02338	0.9751
ENSG00000006534	ALDH3B1	aldehyde dehydrogenase 3 family member B1 [Source:HGNC Symbol;Acc:HGNC:410]	protein_coding	0.01805	0.9949	0.036	0.9995	0.09232	0.9482
ENSG00000006555	TTC22	tetratricopeptide repeat domain 22 [Source:HGNC Symbol;Acc:HGNC:26067]	protein_coding	-0.06477	0.9661	-0.04906	0.9995	-0.005959	0.9946
ENSG00000006576	PHTF2	putative homeodomain transcription factor 2 [Source:HGNC Symbol;Acc:HGNC:13411]	protein_coding	-0.3284	0.7631	-0.3059	0.9995	-0.2869	0.7226
ENSG00000006607	FARP2	FERM, ARH/RhoGEF and pleckstrin domain protein 2 [Source:HGNC Symbol;Acc:HGNC:16460]	protein_coding	-0.1235	0.8874	-0.11	0.9995	-0.1056	0.841
ENSG00000006625	GGCT	gamma-glutamylcyclotransferase [Source:HGNC Symbol;Acc:HGNC:21705]	protein_coding	-0.1247	0.9612	-0.1017	0.9995	-0.1774	0.9062
ENSG00000006634	DBF4	DBF4 zinc finger [Source:HGNC Symbol;Acc:HGNC:17364]	protein_coding	-0.1395	0.9446	-0.1154	0.9995	-0.09452	0.9352
ENSG00000006638	TBXA2R	thromboxane A2 receptor [Source:HGNC Symbol;Acc:HGNC:11608]	protein_coding	0.9306	0.6025	0.937	0.9062	1.131	0.5413
ENSG00000006652	IFRD1	interferon related developmental regulator 1 [Source:HGNC Symbol;Acc:HGNC:5456]	protein_coding	-0.1475	0.9343	-0.1273	0.9995	-0.07906	0.9392
ENSG00000006695	COX10	cytochrome c oxidase assembly factor heme A:farnesyltransferase COX10 [Source:HGNC Symbol;Acc:HGNC:2260]	protein_coding	0.123	0.905	0.1402	0.9995	0.1609	0.7899
ENSG00000006704	GTF2IRD1	GTF2I repeat domain containing 1 [Source:HGNC Symbol;Acc:HGNC:4661]	protein_coding	0.09667	0.9605	0.1081	0.9995	0.2817	0.7648
ENSG00000006712	PAF1	PAF1 homolog, Paf1/RNA polymerase II complex component [Source:HGNC Symbol;Acc:HGNC:25459]	protein_coding	0.2367	0.8038	0.2516	0.9995	0.2446	0.7157
ENSG00000006715	VPS41	VPS41 subunit of HOPS complex [Source:HGNC Symbol;Acc:HGNC:12713]	protein_coding	-0.1853	0.8261	-0.1636	0.9995	-0.1659	0.7748
ENSG00000006740	ARHGAP44	Rho GTPase activating protein 44 [Source:HGNC Symbol;Acc:HGNC:29096]	protein_coding	0.485	0.8598	0.5069	0.9995	0.515	0.7869
ENSG00000006744	ELAC2	elaC ribonuclease Z 2 [Source:HGNC Symbol;Acc:HGNC:14198]	protein_coding	0.06033	0.9675	0.07603	0.9995	0.07228	0.9306
ENSG00000006747	SCIN	scinderin [Source:HGNC Symbol;Acc:HGNC:21695]	protein_coding	-0.2082	0.9466	-0.1897	0.9995	-0.06433	0.9768
ENSG00000006756	ARSD	arylsulfatase D [Source:HGNC Symbol;Acc:HGNC:717]	protein_coding	-0.07923	0.9606	-0.0604	0.9995	-0.07818	0.9325
ENSG00000006757	PNPLA4	patatin like phospholipase domain containing 4 [Source:HGNC Symbol;Acc:HGNC:24887]	protein_coding	-0.3448	0.8598	-0.3276	0.9995	-0.4927	0.6997
ENSG00000006831	ADIPOR2	adiponectin receptor 2 [Source:HGNC Symbol;Acc:HGNC:24041]	protein_coding	-0.1358	0.8451	-0.1159	0.9995	-0.135	0.7764
ENSG00000006837	CDKL3	cyclin dependent kinase like 3 [Source:HGNC Symbol;Acc:HGNC:15483]	protein_coding	0.1231	0.9612	0.1434	0.9995	0.09754	0.9392
ENSG00000007001	UPP2	uridine phosphorylase 2 [Source:HGNC Symbol;Acc:HGNC:23061]	protein_coding	0.1545	0.961	0.1557	0.9995	0.2531	0.8528
ENSG00000007038	PRSS21	serine protease 21 [Source:HGNC Symbol;Acc:HGNC:9485]	protein_coding	-0.8926	0.7424	-0.8684	0.9907	-1.12	0.6786
ENSG00000007047	MARK4	microtubule affinity regulating kinase 4 [Source:HGNC Symbol;Acc:HGNC:13538]	protein_coding	0.1726	0.8882	0.1857	0.9995	0.2271	0.7411
ENSG00000007062	PROM1	prominin 1 [Source:HGNC Symbol;Acc:HGNC:9454]	protein_coding	-0.3355	0.9583	-0.3154	0.9995	-1.243	0.7411
ENSG00000007080	CCDC124	coiled-coil domain containing 124 [Source:HGNC Symbol;Acc:HGNC:25171]	protein_coding	0.254	0.8458	0.2687	0.9995	0.2921	0.7228
ENSG00000007129	CEACAM21	CEA cell adhesion molecule 21 [Source:HGNC Symbol;Acc:HGNC:28834]	protein_coding	0.03467	0.9843	0.05467	0.9995	-0.01965	0.9834
ENSG00000007168	PAFAH1B1	platelet activating factor acetylhydrolase 1b regulatory subunit 1 [Source:HGNC Symbol;Acc:HGNC:8574]	protein_coding	-0.002693	0.9985	0.01884	0.9995	0.01266	0.9824
ENSG00000007171	NOS2	nitric oxide synthase 2 [Source:HGNC Symbol;Acc:HGNC:7873]	protein_coding	-0.3425	0.9612	-0.2992	0.9995	1.155	0.822
ENSG00000007174	DNAH9	dynein axonemal heavy chain 9 [Source:HGNC Symbol;Acc:HGNC:2953]	protein_coding	0.4359	0.8362	0.4411	0.9995	0.5197	0.6972
ENSG00000007202	KIAA0100	KIAA0100 [Source:HGNC Symbol;Acc:HGNC:28960]	protein_coding	-0.07282	0.9515	-0.05609	0.9995	-0.06993	0.9309
ENSG00000007237		growth arrest specific 7 [Source:NCBI gene;Acc:8522]	protein_coding	-0.05902	0.97	-0.04152	0.9995	-0.08682	0.9212
ENSG00000007264	MATK	megakaryocyte-associated tyrosine kinase [Source:HGNC Symbol;Acc:HGNC:6906]	protein_coding	0.2538	0.8874	0.2709	0.9995	0.2264	0.8399
ENSG00000007341	ST7L	suppression of tumorigenicity 7 like [Source:HGNC Symbol;Acc:HGNC:18441]	protein_coding	0.2675	0.7939	0.2994	0.9995	0.2637	0.7157
ENSG00000007376	RPUSD1	RNA pseudouridine synthase domain containing 1 [Source:HGNC Symbol;Acc:HGNC:14173]	protein_coding	0.28	0.8458	0.2948	0.9995	0.3569	0.6997
ENSG00000007384	RHBDF1	rhomboid 5 homolog 1 [Source:HGNC Symbol;Acc:HGNC:20561]	protein_coding	-0.02218	0.9906	-0.006434	0.9996	0.09538	0.9235
ENSG00000007392	LUC7L	LUC7 like [Source:HGNC Symbol;Acc:HGNC:6723]	protein_coding	0.097	0.9089	0.1149	0.9995	0.1331	0.8086
ENSG00000007516	BAIAP3	BAI1 associated protein 3 [Source:HGNC Symbol;Acc:HGNC:948]	protein_coding	-0.4544	0.8965	-0.4377	0.9995	-0.6074	0.7648
ENSG00000007520	TSR3	TSR3 ribosome maturation factor [Source:HGNC Symbol;Acc:HGNC:14175]	protein_coding	0.07935	0.9612	0.09492	0.9995	0.1256	0.8913
ENSG00000007541	PIGQ	phosphatidylinositol glycan anchor biosynthesis class Q [Source:HGNC Symbol;Acc:HGNC:14135]	protein_coding	0.08487	0.9621	0.1	0.9995	0.1658	0.8516
ENSG00000007866	TEAD3	TEA domain transcription factor 3 [Source:HGNC Symbol;Acc:HGNC:11716]	protein_coding	0.02032	0.9904	0.03456	0.9995	0.1116	0.8875
ENSG00000007923	DNAJC11	DnaJ heat shock protein family (Hsp40) member C11 [Source:HGNC Symbol;Acc:HGNC:25570]	protein_coding	0.006991	0.9962	0.02008	0.9995	0.06502	0.9321
ENSG00000007933	FMO3	flavin containing dimethylaniline monoxygenase 3 [Source:HGNC Symbol;Acc:HGNC:3771]	protein_coding	-1.109	0.4054	-1.08	0.6273	-0.9236	0.6786
ENSG00000007944	MYLIP	myosin regulatory light chain interacting protein [Source:HGNC Symbol;Acc:HGNC:21155]	protein_coding	-0.2055	0.8679	-0.1866	0.9995	-0.1673	0.8247
ENSG00000007968	E2F2	E2F transcription factor 2 [Source:HGNC Symbol;Acc:HGNC:3114]	protein_coding	0.6628	0.3496	0.6814	0.4837	0.788	0.52
ENSG00000008018	PSMB1	proteasome 20S subunit beta 1 [Source:HGNC Symbol;Acc:HGNC:9537]	protein_coding	0.1205	0.9341	0.1425	0.9995	0.1938	0.8246
ENSG00000008083	JARID2	jumonji and AT-rich interaction domain containing 2 [Source:HGNC Symbol;Acc:HGNC:6196]	protein_coding	0.01276	0.9946	0.03077	0.9995	0.03016	0.9739
ENSG00000008086	CDKL5	cyclin dependent kinase like 5 [Source:HGNC Symbol;Acc:HGNC:11411]	protein_coding	-0.01337	0.9951	0.001669	0.9996	0.1113	0.9062
ENSG00000008118	CAMK1G	calcium/calmodulin dependent protein kinase IG [Source:HGNC Symbol;Acc:HGNC:14585]	protein_coding	0.5073	0.8965	0.527	0.9995	0.8734	0.7145
ENSG00000008128	CDK11A	cyclin dependent kinase 11A [Source:HGNC Symbol;Acc:HGNC:1730]	protein_coding	0.2286	0.8199	0.249	0.9995	0.2384	0.7393
ENSG00000008130	NADK	NAD kinase [Source:HGNC Symbol;Acc:HGNC:29831]	protein_coding	0.2074	0.8854	0.2238	0.9995	0.2238	0.7865
ENSG00000008196	TFAP2B	transcription factor AP-2 beta [Source:HGNC Symbol;Acc:HGNC:11743]	protein_coding	0.6386	0.8041	0.6442	0.9995	0.7326	0.6854
ENSG00000008256	CYTH3	cytohesin 3 [Source:HGNC Symbol;Acc:HGNC:9504]	protein_coding	-0.2966	0.7725	-0.2818	0.9995	-0.1982	0.8057
ENSG00000008277	ADAM22	ADAM metallopeptidase domain 22 [Source:HGNC Symbol;Acc:HGNC:201]	protein_coding	-0.4159	0.8936	-0.3955	0.9995	-0.07523	0.9704
ENSG00000008282	SYPL1	synaptophysin like 1 [Source:HGNC Symbol;Acc:HGNC:11507]	protein_coding	0.03047	0.9821	0.04983	0.9995	0.0413	0.9529
ENSG00000008283	CYB561	cytochrome b561 [Source:HGNC Symbol;Acc:HGNC:2571]	protein_coding	-0.0907	0.9334	-0.07445	0.9995	-0.07898	0.91
ENSG00000008294	SPAG9	sperm associated antigen 9 [Source:HGNC Symbol;Acc:HGNC:14524]	protein_coding	-0.002587	0.9992	0.01394	0.9995	-0.01573	0.9781
ENSG00000008300	CELSR3	cadherin EGF LAG seven-pass G-type receptor 3 [Source:HGNC Symbol;Acc:HGNC:3230]	protein_coding	0.4733	0.7118	0.4921	0.9907	0.5362	0.6783
ENSG00000008311	AASS	aminoadipate-semialdehyde synthase [Source:HGNC Symbol;Acc:HGNC:17366]	protein_coding	-0.2998	0.8025	-0.2799	0.9995	-0.2534	0.7411
ENSG00000008323	PLEKHG6	pleckstrin homology and RhoGEF domain containing G6 [Source:HGNC Symbol;Acc:HGNC:25562]	protein_coding	0.4882	0.8594	0.5089	0.9995	0.9186	0.6284
ENSG00000008382	MPND	MPN domain containing [Source:HGNC Symbol;Acc:HGNC:25934]	protein_coding	-0.02582	0.9872	-0.008048	0.9996	0.004327	0.9954
ENSG00000008394	MGST1	microsomal glutathione S-transferase 1 [Source:HGNC Symbol;Acc:HGNC:7061]	protein_coding	-0.7815	0.6975	-0.7596	0.9416	-0.6154	0.7251
ENSG00000008405	CRY1	cryptochrome circadian regulator 1 [Source:HGNC Symbol;Acc:HGNC:2384]	protein_coding	0.4733	0.5851	0.4896	0.8419	0.5268	0.5384
ENSG00000008441	NFIX	nuclear factor I X [Source:HGNC Symbol;Acc:HGNC:7788]	protein_coding	-0.3404	0.8682	-0.3228	0.9995	-0.184	0.9003
ENSG00000008513	ST3GAL1	ST3 beta-galactoside alpha-2,3-sialyltransferase 1 [Source:HGNC Symbol;Acc:HGNC:10862]	protein_coding	0.1642	0.9081	0.1808	0.9995	0.1785	0.8376
ENSG00000008516	MMP25	matrix metallopeptidase 25 [Source:HGNC Symbol;Acc:HGNC:14246]	protein_coding	0.02923	0.9906	0.04637	0.9995	0.1067	0.9414
ENSG00000008517	IL32	interleukin 32 [Source:HGNC Symbol;Acc:HGNC:16830]	protein_coding	0.3895	0.7878	0.408	0.9995	0.4587	0.7043
ENSG00000008710	PKD1	polycystin 1, transient receptor potential channel interacting [Source:HGNC Symbol;Acc:HGNC:9008]	protein_coding	0.03062	0.9883	0.04624	0.9995	0.08374	0.9361
ENSG00000008735	MAPK8IP2	mitogen-activated protein kinase 8 interacting protein 2 [Source:HGNC Symbol;Acc:HGNC:6883]	protein_coding	0.6043	0.8296	0.6187	0.9995	1.126	0.6029
ENSG00000008838	MED24	mediator complex subunit 24 [Source:HGNC Symbol;Acc:HGNC:22963]	protein_coding	0.01729	0.9927	0.03254	0.9995	0.04754	0.959
ENSG00000008853	RHOBTB2	Rho related BTB domain containing 2 [Source:HGNC Symbol;Acc:HGNC:18756]	protein_coding	0.2354	0.87	0.2523	0.9995	0.2914	0.7262
ENSG00000008869	HEATR5B	HEAT repeat containing 5B [Source:HGNC Symbol;Acc:HGNC:29273]	protein_coding	-0.2717	0.8079	-0.2509	0.9995	-0.2539	0.7411
ENSG00000008952	SEC62	SEC62 homolog, preprotein translocation factor [Source:HGNC Symbol;Acc:HGNC:11846]	protein_coding	-0.1392	0.9461	-0.1189	0.9995	-0.07423	0.9558
ENSG00000008988	RPS20	ribosomal protein S20 [Source:HGNC Symbol;Acc:HGNC:10405]	protein_coding	-0.3727	0.7937	-0.3511	0.9995	-0.1333	0.8784
ENSG00000009307	CSDE1	cold shock domain containing E1 [Source:HGNC Symbol;Acc:HGNC:29905]	protein_coding	-0.2168	0.8458	-0.1953	0.9995	-0.07615	0.9215
ENSG00000009335	UBE3C	ubiquitin protein ligase E3C [Source:HGNC Symbol;Acc:HGNC:16803]	protein_coding	0.02646	0.9795	0.04143	0.9995	-0.001571	0.9977
ENSG00000009694	TENM1	teneurin transmembrane protein 1 [Source:HGNC Symbol;Acc:HGNC:8117]	protein_coding	-1.201	0.5479	-1.165	0.7205	-1.477	0.5209
ENSG00000009780	FAM76A	family with sequence similarity 76 member A [Source:HGNC Symbol;Acc:HGNC:28530]	protein_coding	-0.1188	0.9173	-0.0981	0.9995	-0.06659	0.9255
ENSG00000009790	TRAF3IP3	TRAF3 interacting protein 3 [Source:HGNC Symbol;Acc:HGNC:30766]	protein_coding	0.09718	0.9609	0.115	0.9995	0.1061	0.9295
ENSG00000009830	POMT2	protein O-mannosyltransferase 2 [Source:HGNC Symbol;Acc:HGNC:19743]	protein_coding	0.02343	0.9882	0.03096	0.9995	0.1128	0.8749
ENSG00000009844	VTA1	vesicle trafficking 1 [Source:HGNC Symbol;Acc:HGNC:20954]	protein_coding	-0.1982	0.9071	-0.1767	0.9995	-0.1981	0.841
ENSG00000009954	BAZ1B	bromodomain adjacent to zinc finger domain 1B [Source:HGNC Symbol;Acc:HGNC:961]	protein_coding	0.2066	0.8296	0.2231	0.9995	0.2043	0.7718
ENSG00000010017	RANBP9	RAN binding protein 9 [Source:HGNC Symbol;Acc:HGNC:13727]	protein_coding	-0.02366	0.9842	-0.008844	0.9996	0.02275	0.9741
ENSG00000010030	ETV7	ETS variant transcription factor 7 [Source:HGNC Symbol;Acc:HGNC:18160]	protein_coding	0.367	0.7521	0.3863	0.9753	0.4063	0.6786
ENSG00000010072	SPRTN	SprT-like N-terminal domain [Source:HGNC Symbol;Acc:HGNC:25356]	protein_coding	-0.1617	0.9023	-0.1406	0.9995	-0.1435	0.8489
ENSG00000010165	EEF1AKNMT	eEF1A lysine and N-terminal methyltransferase [Source:HGNC Symbol;Acc:HGNC:24248]	protein_coding	0.2351	0.5106	0.2524	0.9995	0.2488	0.5907
ENSG00000010219	DYRK4	dual specificity tyrosine phosphorylation regulated kinase 4 [Source:HGNC Symbol;Acc:HGNC:3095]	protein_coding	0.1301	0.9708	0.1521	0.9995	0.1197	0.9548
ENSG00000010244	ZNF207	zinc finger protein 207 [Source:HGNC Symbol;Acc:HGNC:12998]	protein_coding	0.008671	0.9908	0.02799	0.9995	0.01343	0.9804
ENSG00000010256	UQCRC1	ubiquinol-cytochrome c reductase core protein 1 [Source:HGNC Symbol;Acc:HGNC:12585]	protein_coding	0.08384	0.939	0.1006	0.9995	0.06759	0.9285
ENSG00000010270	STARD3NL	STARD3 N-terminal like [Source:HGNC Symbol;Acc:HGNC:19169]	protein_coding	0.248	0.8128	0.2691	0.9995	0.2724	0.7046
ENSG00000010278	CD9	CD9 molecule [Source:HGNC Symbol;Acc:HGNC:1709]	protein_coding	-0.1083	0.9338	-0.0911	0.9995	-0.121	0.8715
ENSG00000010292	NCAPD2	non-SMC condensin I complex subunit D2 [Source:HGNC Symbol;Acc:HGNC:24305]	protein_coding	0.1434	0.9133	0.1601	0.9995	0.1727	0.8272
ENSG00000010295	IFFO1	intermediate filament family orphan 1 [Source:HGNC Symbol;Acc:HGNC:24970]	protein_coding	0.08155	0.9606	0.09835	0.9995	0.1126	0.8969
ENSG00000010310	GIPR	gastric inhibitory polypeptide receptor [Source:HGNC Symbol;Acc:HGNC:4271]	protein_coding	0.1421	0.9176	0.1721	0.9995	0.1538	0.8478
ENSG00000010318	PHF7	PHD finger protein 7 [Source:HGNC Symbol;Acc:HGNC:18458]	protein_coding	0.09794	0.9466	0.1257	0.9995	0.1055	0.9008
ENSG00000010319	SEMA3G	semaphorin 3G [Source:HGNC Symbol;Acc:HGNC:30400]	protein_coding	-0.9969	0.4795	-0.9748	0.6741	-0.7259	0.6854
ENSG00000010322	NISCH	nischarin [Source:HGNC Symbol;Acc:HGNC:18006]	protein_coding	0.07473	0.9481	0.09156	0.9995	0.09494	0.8947
ENSG00000010327	STAB1	stabilin 1 [Source:HGNC Symbol;Acc:HGNC:18628]	protein_coding	-0.3667	0.8199	-0.3512	0.9995	-0.4044	0.738
ENSG00000010361	FUZ	fuzzy planar cell polarity protein [Source:HGNC Symbol;Acc:HGNC:26219]	protein_coding	-0.01173	0.9949	0.006692	0.9996	0.03322	0.9733
ENSG00000010438	PRSS3	serine protease 3 [Source:HGNC Symbol;Acc:HGNC:9486]	protein_coding	-0.4331	0.8874	-0.4193	0.9995	-0.8918	0.6786
ENSG00000010539	ZNF200	zinc finger protein 200 [Source:HGNC Symbol;Acc:HGNC:12993]	protein_coding	0.01008	0.9953	0.02757	0.9995	0.04354	0.9608
ENSG00000010610	CD4	CD4 molecule [Source:HGNC Symbol;Acc:HGNC:1678]	protein_coding	0.03011	0.9904	0.04618	0.9995	0.0001262	0.9998
ENSG00000010626	LRRC23	leucine rich repeat containing 23 [Source:HGNC Symbol;Acc:HGNC:19138]	protein_coding	-0.387	0.6273	-0.3565	0.9995	-0.3494	0.6182
ENSG00000010671	BTK	Bruton tyrosine kinase [Source:HGNC Symbol;Acc:HGNC:1133]	protein_coding	0.1276	0.9208	0.1479	0.9995	0.1454	0.8447
ENSG00000010704	HFE	homeostatic iron regulator [Source:HGNC Symbol;Acc:HGNC:4886]	protein_coding	-0.2219	0.8499	-0.1961	0.9995	-0.2094	0.7817
ENSG00000010803	SCMH1	Scm polycomb group protein homolog 1 [Source:HGNC Symbol;Acc:HGNC:19003]	protein_coding	-0.06955	0.9606	-0.05716	0.9995	0.001081	0.999
ENSG00000010810	FYN	FYN proto-oncogene, Src family tyrosine kinase [Source:HGNC Symbol;Acc:HGNC:4037]	protein_coding	0.1871	0.8499	0.2075	0.9995	0.1933	0.7411
ENSG00000010818	HIVEP2	HIVEP zinc finger 2 [Source:HGNC Symbol;Acc:HGNC:4921]	protein_coding	0.07786	0.9606	0.09616	0.9995	0.05343	0.9504
ENSG00000010932	FMO1	flavin containing dimethylaniline monoxygenase 1 [Source:HGNC Symbol;Acc:HGNC:3769]	protein_coding	-0.5274	0.8874	-0.5012	0.9995	-0.5136	0.841
ENSG00000011007	ELOA	elongin A [Source:HGNC Symbol;Acc:HGNC:11620]	protein_coding	0.04384	0.9612	0.05965	0.9995	0.05485	0.923
ENSG00000011009	LYPLA2	lysophospholipase 2 [Source:HGNC Symbol;Acc:HGNC:6738]	protein_coding	0.2662	0.8412	0.2821	0.9995	0.3055	0.7262
ENSG00000011021	CLCN6	chloride voltage-gated channel 6 [Source:HGNC Symbol;Acc:HGNC:2024]	protein_coding	-0.06382	0.9661	-0.04822	0.9995	-0.009908	0.9924
ENSG00000011028	MRC2	mannose receptor C type 2 [Source:HGNC Symbol;Acc:HGNC:16875]	protein_coding	-0.3907	0.8195	-0.3754	0.9995	-0.3553	0.7869
ENSG00000011105	TSPAN9	tetraspanin 9 [Source:HGNC Symbol;Acc:HGNC:21640]	protein_coding	-1.083	0.3495	-1.069	0.3987	-1.146	0.5472
ENSG00000011114	BTBD7	BTB domain containing 7 [Source:HGNC Symbol;Acc:HGNC:18269]	protein_coding	-0.0679	0.9378	-0.05041	0.9995	-0.06382	0.9056
ENSG00000011132	APBA3	amyloid beta precursor protein binding family A member 3 [Source:HGNC Symbol;Acc:HGNC:580]	protein_coding	0.2958	0.7424	0.3153	0.9995	0.3122	0.6786
ENSG00000011143	MKS1	MKS transition zone complex subunit 1 [Source:HGNC Symbol;Acc:HGNC:7121]	protein_coding	0.09438	0.9466	0.1057	0.9995	0.1745	0.8272
ENSG00000011198	ABHD5	abhydrolase domain containing 5 [Source:HGNC Symbol;Acc:HGNC:21396]	protein_coding	-0.402	0.8464	-0.3785	0.9995	-0.3097	0.8272
ENSG00000011201	ANOS1	anosmin 1 [Source:HGNC Symbol;Acc:HGNC:6211]	protein_coding	-0.541	0.7725	-0.5193	0.9995	-0.5143	0.7445
ENSG00000011243	AKAP8L	A-kinase anchoring protein 8 like [Source:HGNC Symbol;Acc:HGNC:29857]	protein_coding	0.1235	0.8882	0.1421	0.9995	0.1364	0.8111
ENSG00000011258	MBTD1	mbt domain containing 1 [Source:HGNC Symbol;Acc:HGNC:19866]	protein_coding	-0.2464	0.8874	-0.2225	0.9995	-0.2061	0.8341
ENSG00000011260	UTP18	UTP18 small subunit processome component [Source:HGNC Symbol;Acc:HGNC:24274]	protein_coding	-0.05	0.9762	-0.02815	0.9995	-0.02632	0.9768
ENSG00000011275	RNF216	ring finger protein 216 [Source:HGNC Symbol;Acc:HGNC:21698]	protein_coding	0.06839	0.9508	0.08316	0.9995	0.07938	0.9003
ENSG00000011295	TTC19	tetratricopeptide repeat domain 19 [Source:HGNC Symbol;Acc:HGNC:26006]	protein_coding	-0.2884	0.7335	-0.2683	0.9995	-0.2433	0.717
ENSG00000011304	PTBP1	polypyrimidine tract binding protein 1 [Source:HGNC Symbol;Acc:HGNC:9583]	protein_coding	0.2541	0.7952	0.2706	0.9995	0.204	0.7748
ENSG00000011347	SYT7	synaptotagmin 7 [Source:HGNC Symbol;Acc:HGNC:11514]	protein_coding	0.7852	0.6861	0.8003	0.9728	1.197	0.5281
ENSG00000011376	LARS2	leucyl-tRNA synthetase 2, mitochondrial [Source:HGNC Symbol;Acc:HGNC:17095]	protein_coding	0.1629	0.8874	0.1745	0.9995	0.2267	0.7262
ENSG00000011405	PIK3C2A	phosphatidylinositol-4-phosphate 3-kinase catalytic subunit type 2 alpha [Source:HGNC Symbol;Acc:HGNC:8971]	protein_coding	-0.3119	0.8072	-0.2904	0.9995	-0.3046	0.7317
ENSG00000011422	PLAUR	plasminogen activator, urokinase receptor [Source:HGNC Symbol;Acc:HGNC:9053]	protein_coding	0.7455	0.6344	0.7629	0.7793	0.888	0.6565
ENSG00000011426	ANLN	anillin actin binding protein [Source:HGNC Symbol;Acc:HGNC:14082]	protein_coding	0.09285	0.9613	0.1108	0.9995	0.1012	0.9282
ENSG00000011451	WIZ	WIZ zinc finger [Source:HGNC Symbol;Acc:HGNC:30917]	protein_coding	0.2146	0.8874	0.2304	0.9995	0.2691	0.7477
ENSG00000011454	RABGAP1	RAB GTPase activating protein 1 [Source:HGNC Symbol;Acc:HGNC:17155]	protein_coding	-0.2367	0.8119	-0.2165	0.9995	-0.2271	0.745
ENSG00000011465	DCN	decorin [Source:HGNC Symbol;Acc:HGNC:2705]	protein_coding	-0.6961	0.1611	-0.6772	0.6564	-0.5322	0.5789
ENSG00000011478	QPCTL	glutaminyl-peptide cyclotransferase like [Source:HGNC Symbol;Acc:HGNC:25952]	protein_coding	0.2131	0.9089	0.2295	0.9995	0.1006	0.936
ENSG00000011485	PPP5C	protein phosphatase 5 catalytic subunit [Source:HGNC Symbol;Acc:HGNC:9322]	protein_coding	0.09729	0.934	0.112	0.9995	0.1162	0.8585
ENSG00000011523	CEP68	centrosomal protein 68 [Source:HGNC Symbol;Acc:HGNC:29076]	protein_coding	0.0005964	0.9995	0.003409	0.9996	0.154	0.9153
ENSG00000011566	MAP4K3	mitogen-activated protein kinase kinase kinase kinase 3 [Source:HGNC Symbol;Acc:HGNC:6865]	protein_coding	-0.3969	0.5729	-0.3738	0.9728	-0.3495	0.6479
ENSG00000011590	ZBTB32	zinc finger and BTB domain containing 32 [Source:HGNC Symbol;Acc:HGNC:16763]	protein_coding	0.9003	0.1749	0.9193	0.2209	0.8747	0.5217
ENSG00000011600	TYROBP	TYRO protein tyrosine kinase binding protein [Source:HGNC Symbol;Acc:HGNC:12449]	protein_coding	-0.09452	0.9747	-0.07575	0.9995	0.005323	0.9976
ENSG00000011638	TMEM159	transmembrane protein 159 [Source:HGNC Symbol;Acc:HGNC:30136]	protein_coding	-0.2737	0.8285	-0.2576	0.9995	-0.2	0.7979
ENSG00000012048	BRCA1	BRCA1 DNA repair associated [Source:HGNC Symbol;Acc:HGNC:1100]	protein_coding	0.06448	0.9612	0.08406	0.9995	0.07617	0.921
ENSG00000012061	ERCC1	ERCC excision repair 1, endonuclease non-catalytic subunit [Source:HGNC Symbol;Acc:HGNC:3433]	protein_coding	0.02135	0.9894	0.03622	0.9995	0.02586	0.9768
ENSG00000012124	CD22	CD22 molecule [Source:HGNC Symbol;Acc:HGNC:1643]	protein_coding	-0.3783	0.8715	-0.3662	0.9995	-0.4452	0.7746
ENSG00000012171	SEMA3B	semaphorin 3B [Source:HGNC Symbol;Acc:HGNC:10724]	protein_coding	0.3495	0.9098	0.3598	0.9995	0.6481	0.717
ENSG00000012174	MBTPS2	membrane bound transcription factor peptidase, site 2 [Source:HGNC Symbol;Acc:HGNC:15455]	protein_coding	-0.2454	0.8429	-0.2276	0.9995	-0.1405	0.8509
ENSG00000012211	PRICKLE3	prickle planar cell polarity protein 3 [Source:HGNC Symbol;Acc:HGNC:6645]	protein_coding	0.2248	0.889	0.2362	0.9995	0.3377	0.7157
ENSG00000012223	LTF	lactotransferrin [Source:HGNC Symbol;Acc:HGNC:6720]	protein_coding	-0.7348	0.8966	-0.7218	0.9995	-0.9298	0.7648
ENSG00000012232	EXTL3	exostosin like glycosyltransferase 3 [Source:HGNC Symbol;Acc:HGNC:3518]	protein_coding	0.253	0.865	0.2683	0.9995	0.2811	0.7411
ENSG00000012660	ELOVL5	ELOVL fatty acid elongase 5 [Source:HGNC Symbol;Acc:HGNC:21308]	protein_coding	-0.146	0.9338	-0.1255	0.9995	-0.1029	0.9223
ENSG00000012779	ALOX5	arachidonate 5-lipoxygenase [Source:HGNC Symbol;Acc:HGNC:435]	protein_coding	-0.005223	0.9992	0.01233	0.9996	0.07059	0.9656
ENSG00000012817	KDM5D	lysine demethylase 5D [Source:HGNC Symbol;Acc:HGNC:11115]	protein_coding	-0.04802	0.9981	-0.02019	0.9996	0.6499	0.9564
ENSG00000012822	CALCOCO1	calcium binding and coiled-coil domain 1 [Source:HGNC Symbol;Acc:HGNC:29306]	protein_coding	-0.1411	0.8531	-0.1226	0.9995	-0.1455	0.7931
ENSG00000012963	UBR7	ubiquitin protein ligase E3 component n-recognin 7 (putative) [Source:HGNC Symbol;Acc:HGNC:20344]	protein_coding	0.1286	0.8918	0.1449	0.9995	0.1507	0.7899
ENSG00000012983	MAP4K5	mitogen-activated protein kinase kinase kinase kinase 5 [Source:HGNC Symbol;Acc:HGNC:6867]	protein_coding	-0.3214	0.7063	-0.3035	0.9995	-0.2705	0.7154
ENSG00000013016	EHD3	EH domain containing 3 [Source:HGNC Symbol;Acc:HGNC:3244]	protein_coding	0.04199	0.9797	0.05381	0.9995	0.1356	0.8561
ENSG00000013275	PSMC4	proteasome 26S subunit, ATPase 4 [Source:HGNC Symbol;Acc:HGNC:9551]	protein_coding	0.2146	0.6784	0.2332	0.9995	0.1971	0.7148
ENSG00000013288	MAN2B2	mannosidase alpha class 2B member 2 [Source:HGNC Symbol;Acc:HGNC:29623]	protein_coding	0.1382	0.8951	0.1544	0.9995	0.1582	0.7971
ENSG00000013306	SLC25A39	solute carrier family 25 member 39 [Source:HGNC Symbol;Acc:HGNC:24279]	protein_coding	0.05971	0.9661	0.07578	0.9995	0.06989	0.9351
ENSG00000013364	MVP	major vault protein [Source:HGNC Symbol;Acc:HGNC:7531]	protein_coding	0.2516	0.8532	0.268	0.9995	0.2463	0.7965
ENSG00000013374	NUB1	negative regulator of ubiquitin like proteins 1 [Source:HGNC Symbol;Acc:HGNC:17623]	protein_coding	0.07032	0.9606	0.08939	0.9995	0.03167	0.9673
ENSG00000013375	PGM3	phosphoglucomutase 3 [Source:HGNC Symbol;Acc:HGNC:8907]	protein_coding	-0.2582	0.8994	-0.2386	0.9995	-0.2469	0.8384
ENSG00000013392	RWDD2A	RWD domain containing 2A [Source:HGNC Symbol;Acc:HGNC:21385]	protein_coding	-0.2151	0.9089	-0.1948	0.9995	-0.2206	0.8412
ENSG00000013441	CLK1	CDC like kinase 1 [Source:HGNC Symbol;Acc:HGNC:2068]	protein_coding	-0.2416	0.8854	-0.2215	0.9995	-0.185	0.8457
ENSG00000013503	POLR3B	RNA polymerase III subunit B [Source:HGNC Symbol;Acc:HGNC:30348]	protein_coding	-0.1633	0.9035	-0.1355	0.9995	-0.2311	0.747
ENSG00000013523	ANGEL1	angel homolog 1 [Source:HGNC Symbol;Acc:HGNC:19961]	protein_coding	-0.04665	0.9795	-0.0303	0.9995	0.001639	0.9984
ENSG00000013561	RNF14	ring finger protein 14 [Source:HGNC Symbol;Acc:HGNC:10058]	protein_coding	0.01709	0.9904	0.04169	0.9995	0.01879	0.9791
ENSG00000013563	DNASE1L1	deoxyribonuclease 1 like 1 [Source:HGNC Symbol;Acc:HGNC:2957]	protein_coding	0.2338	0.9081	0.2608	0.9995	0.2596	0.826
ENSG00000013573	DDX11	DEAD/H-box helicase 11 [Source:HGNC Symbol;Acc:HGNC:2736]	protein_coding	-0.1335	0.9466	-0.1117	0.9995	-0.3298	0.7567
ENSG00000013583	HEBP1	heme binding protein 1 [Source:HGNC Symbol;Acc:HGNC:17176]	protein_coding	-0.145	0.8951	-0.1307	0.9995	-0.1099	0.8697
ENSG00000013588	GPRC5A	G protein-coupled receptor class C group 5 member A [Source:HGNC Symbol;Acc:HGNC:9836]	protein_coding	0.0539	0.9905	0.07185	0.9995	0.8327	0.814
ENSG00000013619	MAMLD1	mastermind like domain containing 1 [Source:HGNC Symbol;Acc:HGNC:2568]	protein_coding	0.2836	0.8744	0.3019	0.9995	0.2909	0.7769
ENSG00000013725	CD6	CD6 molecule [Source:HGNC Symbol;Acc:HGNC:1691]	protein_coding	0.07174	0.9729	0.09089	0.9995	0.07011	0.9548
ENSG00000013810	TACC3	transforming acidic coiled-coil containing protein 3 [Source:HGNC Symbol;Acc:HGNC:11524]	protein_coding	0.4374	0.4151	0.4548	0.6645	0.4586	0.5641
ENSG00000014123	UFL1	UFM1 specific ligase 1 [Source:HGNC Symbol;Acc:HGNC:23039]	protein_coding	-0.3325	0.8412	-0.3125	0.9995	-0.3559	0.7411
ENSG00000014164	ZC3H3	zinc finger CCCH-type containing 3 [Source:HGNC Symbol;Acc:HGNC:28972]	protein_coding	0.392	0.7118	0.4094	0.9728	0.4415	0.6559
ENSG00000014216	CAPN1	calpain 1 [Source:HGNC Symbol;Acc:HGNC:1476]	protein_coding	0.1986	0.9098	0.2143	0.9995	0.1446	0.8947
ENSG00000014257	ACPP	acid phosphatase, prostate [Source:HGNC Symbol;Acc:HGNC:125]	protein_coding	-0.04816	0.9883	-0.02846	0.9995	-0.353	0.8283
ENSG00000014824	SLC30A9	solute carrier family 30 member 9 [Source:HGNC Symbol;Acc:HGNC:1329]	protein_coding	-0.2233	0.8874	-0.2016	0.9995	-0.2308	0.7869
ENSG00000014914	MTMR11	myotubularin related protein 11 [Source:HGNC Symbol;Acc:HGNC:24307]	protein_coding	0.2153	0.8874	0.2263	0.9995	0.3203	0.7226
ENSG00000015133	CCDC88C	coiled-coil domain containing 88C [Source:HGNC Symbol;Acc:HGNC:19967]	protein_coding	-0.004453	0.9985	0.01413	0.9995	-0.02191	0.979
ENSG00000015153	YAF2	YY1 associated factor 2 [Source:HGNC Symbol;Acc:HGNC:17363]	protein_coding	-0.1579	0.8994	-0.133	0.9995	-0.1515	0.8327
ENSG00000015171	ZMYND11	zinc finger MYND-type containing 11 [Source:HGNC Symbol;Acc:HGNC:16966]	protein_coding	-0.1619	0.9199	-0.1419	0.9995	-0.1286	0.8876
ENSG00000015285	WAS	WASP actin nucleation promoting factor [Source:HGNC Symbol;Acc:HGNC:12731]	protein_coding	0.3471	0.7053	0.3631	0.9753	0.3774	0.6783
ENSG00000015413	DPEP1	dipeptidase 1 [Source:HGNC Symbol;Acc:HGNC:3002]	protein_coding	-1.793	0.4474	-1.778	0.5332	-1.605	0.7054
ENSG00000015475	BID	BH3 interacting domain death agonist [Source:HGNC Symbol;Acc:HGNC:1050]	protein_coding	0.04433	0.9816	0.06421	0.9995	0.1162	0.9062
ENSG00000015532	XYLT2	xylosyltransferase 2 [Source:HGNC Symbol;Acc:HGNC:15517]	protein_coding	0.177	0.9105	0.194	0.9995	0.2133	0.8247
ENSG00000015676	NUDCD3	NudC domain containing 3 [Source:HGNC Symbol;Acc:HGNC:22208]	protein_coding	0.01048	0.9929	0.02791	0.9995	0.006976	0.9932
ENSG00000016391	CHDH	choline dehydrogenase [Source:HGNC Symbol;Acc:HGNC:24288]	protein_coding	0.0603	0.986	0.07692	0.9995	0.001089	0.9994
ENSG00000016402	IL20RA	interleukin 20 receptor subunit alpha [Source:HGNC Symbol;Acc:HGNC:6003]	protein_coding	-0.9035	0.7467	-0.8874	0.9772	-0.954	0.7329
ENSG00000016602	CLCA4	chloride channel accessory 4 [Source:HGNC Symbol;Acc:HGNC:2018]	protein_coding	-0.2493	0.9609	-0.2444	0.9995	-0.8755	0.7899
ENSG00000016864	GLT8D1	glycosyltransferase 8 domain containing 1 [Source:HGNC Symbol;Acc:HGNC:24870]	protein_coding	-0.1878	0.8594	-0.1674	0.9995	-0.1665	0.8109
ENSG00000017260	ATP2C1	ATPase secretory pathway Ca2+ transporting 1 [Source:HGNC Symbol;Acc:HGNC:13211]	protein_coding	-0.09266	0.9283	-0.07187	0.9995	-0.08595	0.8875
ENSG00000017427	IGF1	insulin like growth factor 1 [Source:HGNC Symbol;Acc:HGNC:5464]	protein_coding	-1.654	0.5526	-1.638	0.3987	-1.923	0.5641
ENSG00000017483	SLC38A5	solute carrier family 38 member 5 [Source:HGNC Symbol;Acc:HGNC:18070]	protein_coding	0.2425	0.9035	0.2584	0.9995	0.2357	0.8395
ENSG00000017797	RALBP1	ralA binding protein 1 [Source:HGNC Symbol;Acc:HGNC:9841]	protein_coding	-0.09003	0.9089	-0.07557	0.9995	-0.08863	0.8631
ENSG00000018189	RUFY3	RUN and FYVE domain containing 3 [Source:HGNC Symbol;Acc:HGNC:30285]	protein_coding	-0.1504	0.889	-0.1301	0.9995	-0.1458	0.826
ENSG00000018236	CNTN1	contactin 1 [Source:HGNC Symbol;Acc:HGNC:2171]	protein_coding	-0.8509	0.6634	-0.8301	0.9213	-0.7163	0.7562
ENSG00000018280	SLC11A1	solute carrier family 11 member 1 [Source:HGNC Symbol;Acc:HGNC:10907]	protein_coding	0.6852	0.8072	0.7001	0.9939	1.204	0.6592
ENSG00000018408	WWTR1	WW domain containing transcription regulator 1 [Source:HGNC Symbol;Acc:HGNC:24042]	protein_coding	-0.2833	0.8598	-0.2622	0.9995	-0.2245	0.8148
ENSG00000018510	AGPS	alkylglycerone phosphate synthase [Source:HGNC Symbol;Acc:HGNC:327]	protein_coding	-0.1863	0.8612	-0.1635	0.9995	-0.1817	0.7748
ENSG00000018610	CXorf56	chromosome X open reading frame 56 [Source:HGNC Symbol;Acc:HGNC:26239]	protein_coding	-0.3342	0.7063	-0.312	0.9995	-0.3159	0.6838
ENSG00000018699	TTC27	tetratricopeptide repeat domain 27 [Source:HGNC Symbol;Acc:HGNC:25986]	protein_coding	-0.1704	0.8874	-0.1467	0.9995	-0.172	0.8026
ENSG00000018869	ZNF582	zinc finger protein 582 [Source:HGNC Symbol;Acc:HGNC:26421]	protein_coding	-0.2759	0.7791	-0.2438	0.9995	-0.2855	0.6972
ENSG00000019102	VSIG2	V-set and immunoglobulin domain containing 2 [Source:HGNC Symbol;Acc:HGNC:17149]	protein_coding	0.202	0.9567	0.2168	0.9995	0.4222	0.841
ENSG00000019144	PHLDB1	pleckstrin homology like domain family B member 1 [Source:HGNC Symbol;Acc:HGNC:23697]	protein_coding	0.2031	0.9089	0.2219	0.9995	0.2084	0.8412
ENSG00000019169	MARCO	macrophage receptor with collagenous structure [Source:HGNC Symbol;Acc:HGNC:6895]	protein_coding	-0.6885	0.8497	-0.6658	0.9995	-0.1737	0.9564
ENSG00000019186	CYP24A1	cytochrome P450 family 24 subfamily A member 1 [Source:HGNC Symbol;Acc:HGNC:2602]	protein_coding	0.9243	0.6465	0.9421	0.8547	1.04	0.6786
ENSG00000019485	PRDM11	PR/SET domain 11 [Source:HGNC Symbol;Acc:HGNC:13996]	protein_coding	0.07252	0.9715	0.08613	0.9995	0.1025	0.9262
ENSG00000019549	SNAI2	snail family transcriptional repressor 2 [Source:HGNC Symbol;Acc:HGNC:11094]	protein_coding	-0.1651	0.9244	-0.1496	0.9995	-0.1917	0.8482
ENSG00000019582	CD74	CD74 molecule [Source:HGNC Symbol;Acc:HGNC:1697]	protein_coding	0.05205	0.9797	0.06852	0.9995	0.05151	0.9686
ENSG00000019991	HGF	hepatocyte growth factor [Source:HGNC Symbol;Acc:HGNC:4893]	protein_coding	0.08024	0.9795	0.09817	0.9995	0.2466	0.8635
ENSG00000019995	ZRANB1	zinc finger RANBP2-type containing 1 [Source:HGNC Symbol;Acc:HGNC:18224]	protein_coding	-0.3034	0.6897	-0.2846	0.9995	-0.2521	0.7034
ENSG00000020129	NCDN	neurochondrin [Source:HGNC Symbol;Acc:HGNC:17597]	protein_coding	0.1949	0.8966	0.2128	0.9995	0.2289	0.7931
ENSG00000020181	ADGRA2	adhesion G protein-coupled receptor A2 [Source:HGNC Symbol;Acc:HGNC:17849]	protein_coding	-0.3563	0.8606	-0.34	0.9995	-0.2529	0.8475
ENSG00000020256	ZFP64	ZFP64 zinc finger protein [Source:HGNC Symbol;Acc:HGNC:15940]	protein_coding	-0.02811	0.9896	-0.0137	0.9996	0.08026	0.9377
ENSG00000020426	MNAT1	MNAT1 component of CDK activating kinase [Source:HGNC Symbol;Acc:HGNC:7181]	protein_coding	0.0672	0.9704	0.09043	0.9995	0.05364	0.9558
ENSG00000020577	SAMD4A	sterile alpha motif domain containing 4A [Source:HGNC Symbol;Acc:HGNC:23023]	protein_coding	0.1528	0.9203	0.1725	0.9995	0.1886	0.8301
ENSG00000020633	RUNX3	RUNX family transcription factor 3 [Source:HGNC Symbol;Acc:HGNC:10473]	protein_coding	0.4793	0.5655	0.4971	0.7939	0.4832	0.5755
ENSG00000020922	MRE11	MRE11 homolog, double strand break repair nuclease [Source:HGNC Symbol;Acc:HGNC:7230]	protein_coding	-0.2204	0.883	-0.1976	0.9995	-0.223	0.7898
ENSG00000021300	PLEKHB1	pleckstrin homology domain containing B1 [Source:HGNC Symbol;Acc:HGNC:19079]	protein_coding	-0.6109	0.6465	-0.5838	0.987	-0.5189	0.6786
ENSG00000021355	SERPINB1	serpin family B member 1 [Source:HGNC Symbol;Acc:HGNC:3311]	protein_coding	0.3562	0.8412	0.3757	0.9995	0.5128	0.6786
ENSG00000021574	SPAST	spastin [Source:HGNC Symbol;Acc:HGNC:11233]	protein_coding	-0.2772	0.7886	-0.2574	0.9995	-0.2627	0.7202
ENSG00000021762	OSBPL5	oxysterol binding protein like 5 [Source:HGNC Symbol;Acc:HGNC:16392]	protein_coding	0.2044	0.8966	0.2205	0.9995	0.256	0.7802
ENSG00000021776	AQR	aquarius intron-binding spliceosomal factor [Source:HGNC Symbol;Acc:HGNC:29513]	protein_coding	-0.1324	0.8874	-0.1087	0.9995	-0.1207	0.8339
ENSG00000021826	CPS1	carbamoyl-phosphate synthase 1 [Source:HGNC Symbol;Acc:HGNC:2323]	protein_coding	-0.4732	0.8512	-0.4585	0.9995	-0.1114	0.9548
ENSG00000022267	FHL1	four and a half LIM domains 1 [Source:HGNC Symbol;Acc:HGNC:3702]	protein_coding	-1.07	0.434	-1.049	0.5769	-0.7076	0.7394
ENSG00000022277	RTF2	replication termination factor 2 [Source:HGNC Symbol;Acc:HGNC:15890]	protein_coding	-0.0216	0.9833	0.005749	0.9996	-0.001681	0.9977
ENSG00000022556	NLRP2	NLR family pyrin domain containing 2 [Source:HGNC Symbol;Acc:HGNC:22948]	protein_coding	0.269	0.9181	0.2895	0.9995	0.2577	0.875
ENSG00000022567	SLC45A4	solute carrier family 45 member 4 [Source:HGNC Symbol;Acc:HGNC:29196]	protein_coding	0.2123	0.8499	0.2254	0.9995	0.2736	0.703
ENSG00000022840	RNF10	ring finger protein 10 [Source:HGNC Symbol;Acc:HGNC:10055]	protein_coding	0.1565	0.8038	0.1724	0.9995	0.1184	0.8272
ENSG00000022976	ZNF839	zinc finger protein 839 [Source:HGNC Symbol;Acc:HGNC:20345]	protein_coding	-0.1393	0.9089	-0.102	0.9995	-0.1571	0.8272
ENSG00000023041	ZDHHC6	zinc finger DHHC-type containing 6 [Source:HGNC Symbol;Acc:HGNC:19160]	protein_coding	0.005236	0.9962	0.03049	0.9995	0.0111	0.9844
ENSG00000023171	GRAMD1B	GRAM domain containing 1B [Source:HGNC Symbol;Acc:HGNC:29214]	protein_coding	0.4627	0.7358	0.4815	0.9642	0.5436	0.6735
ENSG00000023191	RNH1	ribonuclease/angiogenin inhibitor 1 [Source:HGNC Symbol;Acc:HGNC:10074]	protein_coding	0.1548	0.9081	0.1706	0.9995	0.14	0.875
ENSG00000023228	NDUFS1	NADH:ubiquinone oxidoreductase core subunit S1 [Source:HGNC Symbol;Acc:HGNC:7707]	protein_coding	-0.1776	0.8532	-0.1561	0.9995	-0.1625	0.8025
ENSG00000023287	RB1CC1	RB1 inducible coiled-coil 1 [Source:HGNC Symbol;Acc:HGNC:15574]	protein_coding	-0.3142	0.7846	-0.292	0.9995	-0.2932	0.7218
ENSG00000023318	ERP44	endoplasmic reticulum protein 44 [Source:HGNC Symbol;Acc:HGNC:18311]	protein_coding	-0.02944	0.9795	-0.009902	0.9996	-0.03042	0.9608
ENSG00000023330	ALAS1	5'-aminolevulinate synthase 1 [Source:HGNC Symbol;Acc:HGNC:396]	protein_coding	0.1987	0.9035	0.2178	0.9995	0.1716	0.8528
ENSG00000023445	BIRC3	baculoviral IAP repeat containing 3 [Source:HGNC Symbol;Acc:HGNC:591]	protein_coding	-0.007508	0.9985	0.01408	0.9996	0.01821	0.9904
ENSG00000023516	AKAP11	A-kinase anchoring protein 11 [Source:HGNC Symbol;Acc:HGNC:369]	protein_coding	-0.2238	0.8285	-0.2031	0.9995	-0.1943	0.7764
ENSG00000023572	GLRX2	glutaredoxin 2 [Source:HGNC Symbol;Acc:HGNC:16065]	protein_coding	0.09622	0.9583	0.1152	0.9995	0.08215	0.9371
ENSG00000023608	SNAPC1	small nuclear RNA activating complex polypeptide 1 [Source:HGNC Symbol;Acc:HGNC:11134]	protein_coding	0.1202	0.9528	0.1373	0.9995	0.1707	0.8626
ENSG00000023697	DERA	deoxyribose-phosphate aldolase [Source:HGNC Symbol;Acc:HGNC:24269]	protein_coding	-0.09236	0.9385	-0.0712	0.9995	-0.08455	0.901
ENSG00000023734	STRAP	serine/threonine kinase receptor associated protein [Source:HGNC Symbol;Acc:HGNC:30796]	protein_coding	-0.02382	0.9843	-0.005821	0.9996	-0.02623	0.9692
ENSG00000023839	ABCC2	ATP binding cassette subfamily C member 2 [Source:HGNC Symbol;Acc:HGNC:53]	protein_coding	-0.05495	0.9865	-0.0378	0.9995	0.0802	0.9558
ENSG00000023892	DEF6	DEF6 guanine nucleotide exchange factor [Source:HGNC Symbol;Acc:HGNC:2760]	protein_coding	0.235	0.7424	0.2537	0.9995	0.2566	0.6972
ENSG00000023902	PLEKHO1	pleckstrin homology domain containing O1 [Source:HGNC Symbol;Acc:HGNC:24310]	protein_coding	0.2419	0.9081	0.2597	0.9995	0.294	0.8339
ENSG00000023909	GCLM	glutamate-cysteine ligase modifier subunit [Source:HGNC Symbol;Acc:HGNC:4312]	protein_coding	0.05282	0.9765	0.07173	0.9995	0.07633	0.9363
ENSG00000024048	UBR2	ubiquitin protein ligase E3 component n-recognin 2 [Source:HGNC Symbol;Acc:HGNC:21289]	protein_coding	-0.05114	0.9612	-0.0298	0.9995	-0.04583	0.9382
ENSG00000024422	EHD2	EH domain containing 2 [Source:HGNC Symbol;Acc:HGNC:3243]	protein_coding	-0.0672	0.9843	-0.05114	0.9995	-0.01403	0.9944
ENSG00000024526	DEPDC1	DEP domain containing 1 [Source:HGNC Symbol;Acc:HGNC:22949]	protein_coding	0.4103	0.8499	0.4296	0.9995	0.3838	0.8059
ENSG00000024862	CCDC28A	coiled-coil domain containing 28A [Source:HGNC Symbol;Acc:HGNC:21098]	protein_coding	-0.1115	0.9349	-0.08902	0.9995	-0.1117	0.8837
ENSG00000025039	RRAGD	Ras related GTP binding D [Source:HGNC Symbol;Acc:HGNC:19903]	protein_coding	0.2627	0.8679	0.2857	0.9995	0.2599	0.7899
ENSG00000025156	HSF2	heat shock transcription factor 2 [Source:HGNC Symbol;Acc:HGNC:5225]	protein_coding	-0.4222	0.675	-0.395	0.987	-0.4796	0.5789
ENSG00000025293	PHF20	PHD finger protein 20 [Source:HGNC Symbol;Acc:HGNC:16098]	protein_coding	-0.12	0.8653	-0.1035	0.9995	-0.1026	0.8362
ENSG00000025434	NR1H3	nuclear receptor subfamily 1 group H member 3 [Source:HGNC Symbol;Acc:HGNC:7966]	protein_coding	0.0496	0.9852	0.06739	0.9995	0.1067	0.9437
ENSG00000025708	TYMP	thymidine phosphorylase [Source:HGNC Symbol;Acc:HGNC:3148]	protein_coding	0.5005	0.6289	0.5159	0.9642	0.5358	0.6783
ENSG00000025770	NCAPH2	non-SMC condensin II complex subunit H2 [Source:HGNC Symbol;Acc:HGNC:25071]	protein_coding	0.1685	0.8874	0.186	0.9995	0.1886	0.7899
ENSG00000025772	TOMM34	translocase of outer mitochondrial membrane 34 [Source:HGNC Symbol;Acc:HGNC:15746]	protein_coding	-0.2454	0.9277	-0.2403	0.9995	-0.05399	0.9768
ENSG00000025796	SEC63	SEC63 homolog, protein translocation regulator [Source:HGNC Symbol;Acc:HGNC:21082]	protein_coding	-0.2034	0.8966	-0.1829	0.9995	-0.1812	0.8482
ENSG00000025800	KPNA6	karyopherin subunit alpha 6 [Source:HGNC Symbol;Acc:HGNC:6399]	protein_coding	0.1234	0.8835	0.1408	0.9995	0.1216	0.8249
ENSG00000026025	VIM	vimentin [Source:HGNC Symbol;Acc:HGNC:12692]	protein_coding	0.1083	0.9343	0.1263	0.9995	0.2864	0.7445
ENSG00000026103	FAS	Fas cell surface death receptor [Source:HGNC Symbol;Acc:HGNC:11920]	protein_coding	0.1009	0.9455	0.1233	0.9995	0.1489	0.841
ENSG00000026297	RNASET2	ribonuclease T2 [Source:HGNC Symbol;Acc:HGNC:21686]	protein_coding	0.05336	0.9811	0.07129	0.9995	0.0388	0.9776
ENSG00000026508	CD44	CD44 molecule (Indian blood group) [Source:HGNC Symbol;Acc:HGNC:1681]	protein_coding	-0.02032	0.9893	-0.0007569	0.9996	0.08695	0.9135
ENSG00000026559	KCNG1	potassium voltage-gated channel modifier subfamily G member 1 [Source:HGNC Symbol;Acc:HGNC:6248]	protein_coding	0.6801	0.8909	0.6906	0.9995	1.099	0.7586
ENSG00000026652	AGPAT4	1-acylglycerol-3-phosphate O-acyltransferase 4 [Source:HGNC Symbol;Acc:HGNC:20885]	protein_coding	0.1776	0.8994	0.192	0.9995	0.2601	0.7562
ENSG00000026751	SLAMF7	SLAM family member 7 [Source:HGNC Symbol;Acc:HGNC:21394]	protein_coding	-0.02145	0.9904	-0.0001565	0.9997	0.08932	0.9135
ENSG00000026950	BTN3A1	butyrophilin subfamily 3 member A1 [Source:HGNC Symbol;Acc:HGNC:1138]	protein_coding	0.03482	0.977	0.05516	0.9995	0.05985	0.9343
ENSG00000027001	MIPEP	mitochondrial intermediate peptidase [Source:HGNC Symbol;Acc:HGNC:7104]	protein_coding	-0.0995	0.9416	-0.08152	0.9995	-0.01782	0.9831
ENSG00000027075	PRKCH	protein kinase C eta [Source:HGNC Symbol;Acc:HGNC:9403]	protein_coding	0.03174	0.9787	0.05344	0.9995	0.05066	0.936
ENSG00000027697	IFNGR1	interferon gamma receptor 1 [Source:HGNC Symbol;Acc:HGNC:5439]	protein_coding	-0.2278	0.8129	-0.2073	0.9995	-0.2254	0.7228
ENSG00000027847	B4GALT7	beta-1,4-galactosyltransferase 7 [Source:HGNC Symbol;Acc:HGNC:930]	protein_coding	0.1538	0.8598	0.1773	0.9995	0.1686	0.7626
ENSG00000027869	SH2D2A	SH2 domain containing 2A [Source:HGNC Symbol;Acc:HGNC:10821]	protein_coding	0.8537	0.183	0.8716	0.1639	0.8916	0.5217
ENSG00000028116	VRK2	VRK serine/threonine kinase 2 [Source:HGNC Symbol;Acc:HGNC:12719]	protein_coding	-0.1036	0.9605	-0.07928	0.9995	-0.04135	0.9738
ENSG00000028137	TNFRSF1B	TNF receptor superfamily member 1B [Source:HGNC Symbol;Acc:HGNC:11917]	protein_coding	0.633	0.1273	0.6503	0.3897	0.6609	0.4935
ENSG00000028203	VEZT	vezatin, adherens junctions transmembrane protein [Source:HGNC Symbol;Acc:HGNC:18258]	protein_coding	-0.09747	0.9385	-0.07592	0.9995	-0.09503	0.8983
ENSG00000028277	POU2F2	POU class 2 homeobox 2 [Source:HGNC Symbol;Acc:HGNC:9213]	protein_coding	0.374	0.7695	0.3903	0.9934	0.4006	0.6972
ENSG00000028310	BRD9	bromodomain containing 9 [Source:HGNC Symbol;Acc:HGNC:25818]	protein_coding	0.1552	0.8642	0.172	0.9995	0.163	0.7748
ENSG00000028528	SNX1	sorting nexin 1 [Source:HGNC Symbol;Acc:HGNC:11172]	protein_coding	0.06484	0.9364	0.08223	0.9995	0.03228	0.9579
ENSG00000028839	TBPL1	TATA-box binding protein like 1 [Source:HGNC Symbol;Acc:HGNC:11589]	protein_coding	0.1212	0.9365	0.1425	0.9995	0.1771	0.829
ENSG00000029153	ARNTL2	aryl hydrocarbon receptor nuclear translocator like 2 [Source:HGNC Symbol;Acc:HGNC:18984]	protein_coding	0.301	0.8041	0.3217	0.9995	0.3404	0.6972
ENSG00000029363	BCLAF1	BCL2 associated transcription factor 1 [Source:HGNC Symbol;Acc:HGNC:16863]	protein_coding	-0.4784	0.4938	-0.4558	0.7797	-0.4756	0.5641
ENSG00000029364	SLC39A9	solute carrier family 39 member 9 [Source:HGNC Symbol;Acc:HGNC:20182]	protein_coding	-0.08353	0.934	-0.06144	0.9995	-0.06834	0.9135
ENSG00000029534	ANK1	ankyrin 1 [Source:HGNC Symbol;Acc:HGNC:492]	protein_coding	-0.0598	0.9814	-0.04398	0.9995	0.03458	0.9812
ENSG00000029639	TFB1M	transcription factor B1, mitochondrial [Source:HGNC Symbol;Acc:HGNC:17037]	protein_coding	-0.1199	0.9349	-0.09129	0.9995	-0.1789	0.8283
ENSG00000029725	RABEP1	rabaptin, RAB GTPase binding effector protein 1 [Source:HGNC Symbol;Acc:HGNC:17677]	protein_coding	-0.1341	0.9181	-0.1117	0.9995	-0.1277	0.8561
ENSG00000029993	HMGB3	high mobility group box 3 [Source:HGNC Symbol;Acc:HGNC:5004]	protein_coding	0.04609	0.9838	0.06721	0.9995	0.04762	0.9704
ENSG00000030066	NUP160	nucleoporin 160 [Source:HGNC Symbol;Acc:HGNC:18017]	protein_coding	-0.02371	0.9838	-0.002856	0.9996	-0.009137	0.9904
ENSG00000030110	BAK1	BCL2 antagonist/killer 1 [Source:HGNC Symbol;Acc:HGNC:949]	protein_coding	0.3619	0.7513	0.3788	0.987	0.3825	0.6786
ENSG00000030419	IKZF2	IKAROS family zinc finger 2 [Source:HGNC Symbol;Acc:HGNC:13177]	protein_coding	0.247	0.9098	0.2635	0.9995	0.1134	0.9392
ENSG00000030582	GRN	granulin precursor [Source:HGNC Symbol;Acc:HGNC:4601]	protein_coding	0.07067	0.977	0.08592	0.9995	0.1133	0.9392
ENSG00000031003	FAM13B	family with sequence similarity 13 member B [Source:HGNC Symbol;Acc:HGNC:1335]	protein_coding	-0.1655	0.8831	-0.1425	0.9995	-0.1452	0.8135
ENSG00000031081	ARHGAP31	Rho GTPase activating protein 31 [Source:HGNC Symbol;Acc:HGNC:29216]	protein_coding	0.1436	0.9269	0.1634	0.9995	0.08544	0.9288
ENSG00000031691	CENPQ	centromere protein Q [Source:HGNC Symbol;Acc:HGNC:21347]	protein_coding	-0.1947	0.9466	-0.1714	0.9995	-0.15	0.9383
ENSG00000031698	SARS1	seryl-tRNA synthetase 1 [Source:HGNC Symbol;Acc:HGNC:10537]	protein_coding	0.09152	0.9269	0.1096	0.9995	0.1183	0.8619
ENSG00000031823	RANBP3	RAN binding protein 3 [Source:HGNC Symbol;Acc:HGNC:9850]	protein_coding	0.1192	0.9089	0.1344	0.9995	0.1222	0.841
ENSG00000032219	ARID4A	AT-rich interaction domain 4A [Source:HGNC Symbol;Acc:HGNC:9885]	protein_coding	-0.1789	0.8994	-0.1565	0.9995	-0.1998	0.8059
ENSG00000032389	EIPR1	EARP complex and GARP complex interacting protein 1 [Source:HGNC Symbol;Acc:HGNC:12383]	protein_coding	0.157	0.8835	0.1784	0.9995	0.1337	0.8272
ENSG00000032444	PNPLA6	patatin like phospholipase domain containing 6 [Source:HGNC Symbol;Acc:HGNC:16268]	protein_coding	0.2888	0.8642	0.304	0.9995	0.3573	0.7399
ENSG00000032742	IFT88	intraflagellar transport 88 [Source:HGNC Symbol;Acc:HGNC:20606]	protein_coding	-0.1734	0.8874	-0.1563	0.9995	-0.1427	0.8379
ENSG00000033011	ALG1	ALG1 chitobiosyldiphosphodolichol beta-mannosyltransferase [Source:HGNC Symbol;Acc:HGNC:18294]	protein_coding	0.0008672	0.9992	0.01753	0.9995	0.06282	0.946
ENSG00000033030	ZCCHC8	zinc finger CCHC-type containing 8 [Source:HGNC Symbol;Acc:HGNC:25265]	protein_coding	0.06944	0.9461	0.08984	0.9995	0.09123	0.8697
ENSG00000033100	CHPF2	chondroitin polymerizing factor 2 [Source:HGNC Symbol;Acc:HGNC:29270]	protein_coding	0.1427	0.9173	0.1581	0.9995	0.1418	0.8528
ENSG00000033170	FUT8	fucosyltransferase 8 [Source:HGNC Symbol;Acc:HGNC:4019]	protein_coding	-0.2901	0.8874	-0.272	0.9995	-0.2351	0.8432
ENSG00000033178	UBA6	ubiquitin like modifier activating enzyme 6 [Source:HGNC Symbol;Acc:HGNC:25581]	protein_coding	0.2487	0.8874	0.2701	0.9995	0.2644	0.7865
ENSG00000033327	GAB2	GRB2 associated binding protein 2 [Source:HGNC Symbol;Acc:HGNC:14458]	protein_coding	0.01465	0.9929	0.02973	0.9995	0.0464	0.9558
ENSG00000033627	ATP6V0A1	ATPase H+ transporting V0 subunit a1 [Source:HGNC Symbol;Acc:HGNC:865]	protein_coding	0.07905	0.9628	0.0957	0.9995	0.09592	0.9223
ENSG00000033800	PIAS1	protein inhibitor of activated STAT 1 [Source:HGNC Symbol;Acc:HGNC:2752]	protein_coding	-0.09866	0.9455	-0.07779	0.9995	-0.09347	0.91
ENSG00000033867	SLC4A7	solute carrier family 4 member 7 [Source:HGNC Symbol;Acc:HGNC:11033]	protein_coding	-0.4179	0.6273	-0.3971	0.9344	-0.4137	0.6274
ENSG00000034053	APBA2	amyloid beta precursor protein binding family A member 2 [Source:HGNC Symbol;Acc:HGNC:579]	protein_coding	-0.03328	0.9896	-0.01863	0.9996	0.04628	0.9768
ENSG00000034152	MAP2K3	mitogen-activated protein kinase kinase 3 [Source:HGNC Symbol;Acc:HGNC:6843]	protein_coding	0.3033	0.7942	0.3204	0.9995	0.3343	0.6933
ENSG00000034533	ASTE1	asteroid homolog 1 [Source:HGNC Symbol;Acc:HGNC:25021]	protein_coding	-0.2238	0.8532	-0.1952	0.9995	-0.1959	0.7931
ENSG00000034677	RNF19A	ring finger protein 19A, RBR E3 ubiquitin protein ligase [Source:HGNC Symbol;Acc:HGNC:13432]	protein_coding	0.1196	0.9289	0.1405	0.9995	0.1188	0.8753
ENSG00000034693	PEX3	peroxisomal biogenesis factor 3 [Source:HGNC Symbol;Acc:HGNC:8858]	protein_coding	-0.2517	0.8412	-0.2294	0.9995	-0.2079	0.78
ENSG00000034713	GABARAPL2	GABA type A receptor associated protein like 2 [Source:HGNC Symbol;Acc:HGNC:13291]	protein_coding	-0.1163	0.918	-0.09484	0.9995	-0.1016	0.8766
ENSG00000035115	SH3YL1	SH3 and SYLF domain containing 1 [Source:HGNC Symbol;Acc:HGNC:29546]	protein_coding	-0.3158	0.8151	-0.2945	0.9995	-0.3308	0.7218
ENSG00000035141	FAM136A	family with sequence similarity 136 member A [Source:HGNC Symbol;Acc:HGNC:25911]	protein_coding	-0.1003	0.9345	-0.07865	0.9995	-0.08922	0.9053
ENSG00000035403	VCL	vinculin [Source:HGNC Symbol;Acc:HGNC:12665]	protein_coding	-0.3301	0.8538	-0.3141	0.9995	-0.3347	0.78
ENSG00000035499	DEPDC1B	DEP domain containing 1B [Source:HGNC Symbol;Acc:HGNC:24902]	protein_coding	0.2067	0.9343	0.2279	0.9995	0.2848	0.8457
ENSG00000035664	DAPK2	death associated protein kinase 2 [Source:HGNC Symbol;Acc:HGNC:2675]	protein_coding	0.103	0.9466	0.123	0.9995	0.1003	0.91
ENSG00000035681	NSMAF	neutral sphingomyelinase activation associated factor [Source:HGNC Symbol;Acc:HGNC:8017]	protein_coding	-0.07642	0.9466	-0.05554	0.9995	-0.06536	0.9218
ENSG00000035687	ADSS2	adenylosuccinate synthase 2 [Source:HGNC Symbol;Acc:HGNC:292]	protein_coding	-0.08638	0.9582	-0.06476	0.9995	-0.0675	0.938
ENSG00000035720	STAP1	signal transducing adaptor family member 1 [Source:HGNC Symbol;Acc:HGNC:24133]	protein_coding	-0.7336	0.8874	-0.7102	0.9995	-0.3089	0.8879
ENSG00000035862	TIMP2	TIMP metallopeptidase inhibitor 2 [Source:HGNC Symbol;Acc:HGNC:11821]	protein_coding	-0.437	0.675	-0.421	0.9995	-0.5045	0.6786
ENSG00000035928	RFC1	replication factor C subunit 1 [Source:HGNC Symbol;Acc:HGNC:9969]	protein_coding	0.03709	0.9797	0.05802	0.9995	0.05917	0.9392
ENSG00000036054	TBC1D23	TBC1 domain family member 23 [Source:HGNC Symbol;Acc:HGNC:25622]	protein_coding	-0.1173	0.9385	-0.09549	0.9995	-0.1115	0.8957
ENSG00000036257	CUL3	cullin 3 [Source:HGNC Symbol;Acc:HGNC:2553]	protein_coding	-0.1763	0.8874	-0.1544	0.9995	-0.1539	0.8292
ENSG00000036448	MYOM2	myomesin 2 [Source:HGNC Symbol;Acc:HGNC:7614]	protein_coding	0.5129	0.8594	0.5259	0.9995	0.3478	0.8478
ENSG00000036549		zinc finger ZZ-type containing 3 [Source:NCBI gene;Acc:26009]	protein_coding	-0.09734	0.9466	-0.07512	0.9995	-0.103	0.8949
ENSG00000036672	USP2	ubiquitin specific peptidase 2 [Source:HGNC Symbol;Acc:HGNC:12618]	protein_coding	-0.2971	0.8854	-0.2778	0.9995	-0.1506	0.9125
ENSG00000037042	TUBG2	tubulin gamma 2 [Source:HGNC Symbol;Acc:HGNC:12419]	protein_coding	-0.1632	0.9089	-0.1464	0.9995	-0.09731	0.9135
ENSG00000037241	RPL26L1	ribosomal protein L26 like 1 [Source:HGNC Symbol;Acc:HGNC:17050]	protein_coding	-0.1505	0.9263	-0.1285	0.9995	-0.2642	0.7841
ENSG00000037280	FLT4	fms related tyrosine kinase 4 [Source:HGNC Symbol;Acc:HGNC:3767]	protein_coding	0.2467	0.9023	0.2615	0.9995	0.3999	0.7411
ENSG00000037474	NSUN2	NOP2/Sun RNA methyltransferase 2 [Source:HGNC Symbol;Acc:HGNC:25994]	protein_coding	0.08434	0.9181	0.09971	0.9995	0.07732	0.8799
ENSG00000037637	FBXO42	F-box protein 42 [Source:HGNC Symbol;Acc:HGNC:29249]	protein_coding	0.02159	0.9831	0.03666	0.9995	0.04179	0.9392
ENSG00000037749	MFAP3	microfibril associated protein 3 [Source:HGNC Symbol;Acc:HGNC:7034]	protein_coding	-0.07578	0.9528	-0.055	0.9995	-0.04974	0.9462
ENSG00000037757	MRI1	methylthioribose-1-phosphate isomerase 1 [Source:HGNC Symbol;Acc:HGNC:28469]	protein_coding	0.01504	0.9933	0.0344	0.9995	-0.05209	0.9553
ENSG00000037897	METTL1	methyltransferase like 1 [Source:HGNC Symbol;Acc:HGNC:7030]	protein_coding	0.005952	0.9985	0.0142	0.9996	0.1223	0.8899
ENSG00000038002	AGA	aspartylglucosaminidase [Source:HGNC Symbol;Acc:HGNC:318]	protein_coding	-0.501	0.7063	-0.4789	0.9416	-0.4998	0.6786
ENSG00000038210	PI4K2B	phosphatidylinositol 4-kinase type 2 beta [Source:HGNC Symbol;Acc:HGNC:18215]	protein_coding	-0.03873	0.9805	-0.01734	0.9995	-0.04266	0.9572
ENSG00000038219	BOD1L1	biorientation of chromosomes in cell division 1 like 1 [Source:HGNC Symbol;Acc:HGNC:31792]	protein_coding	-0.1595	0.8606	-0.1415	0.9995	-0.1469	0.8059
ENSG00000038274	MAT2B	methionine adenosyltransferase 2B [Source:HGNC Symbol;Acc:HGNC:6905]	protein_coding	-0.06434	0.9613	-0.04138	0.9995	-0.04115	0.9581
ENSG00000038295	TLL1	tolloid like 1 [Source:HGNC Symbol;Acc:HGNC:11843]	protein_coding	-0.1463	0.9612	-0.1324	0.9995	0.2218	0.88
ENSG00000038358	EDC4	enhancer of mRNA decapping 4 [Source:HGNC Symbol;Acc:HGNC:17157]	protein_coding	0.145	0.8991	0.1616	0.9995	0.1649	0.8146
ENSG00000038382	TRIO	trio Rho guanine nucleotide exchange factor [Source:HGNC Symbol;Acc:HGNC:12303]	protein_coding	0.001412	0.9992	0.01934	0.9995	-0.007044	0.9944
ENSG00000038427	VCAN	versican [Source:HGNC Symbol;Acc:HGNC:2464]	protein_coding	-0.5608	0.6344	-0.5406	0.9322	-0.5527	0.6783
ENSG00000038532	CLEC16A	C-type lectin domain containing 16A [Source:HGNC Symbol;Acc:HGNC:29013]	protein_coding	0.1214	0.9208	0.1365	0.9995	0.166	0.8111
ENSG00000038945	MSR1	macrophage scavenger receptor 1 [Source:HGNC Symbol;Acc:HGNC:7376]	protein_coding	-0.01879	0.9962	0.004066	0.9996	-0.05207	0.9825
ENSG00000039068	CDH1	cadherin 1 [Source:HGNC Symbol;Acc:HGNC:1748]	protein_coding	-0.0429	0.9828	-0.02489	0.9995	-0.1113	0.9135
ENSG00000039123	MTREX	Mtr4 exosome RNA helicase [Source:HGNC Symbol;Acc:HGNC:18734]	protein_coding	-0.1457	0.9315	-0.1228	0.9995	-0.1155	0.9109
ENSG00000039319	ZFYVE16	zinc finger FYVE-type containing 16 [Source:HGNC Symbol;Acc:HGNC:20756]	protein_coding	-0.05335	0.975	-0.03284	0.9995	-0.04049	0.964
ENSG00000039523	RIPOR1	RHO family interacting cell polarization regulator 1 [Source:HGNC Symbol;Acc:HGNC:25836]	protein_coding	0.06838	0.9661	0.08449	0.9995	0.09318	0.9135
ENSG00000039560	RAI14	retinoic acid induced 14 [Source:HGNC Symbol;Acc:HGNC:14873]	protein_coding	0.07646	0.9715	0.09647	0.9995	0.08565	0.9405
ENSG00000039600	SOX30	SRY-box transcription factor 30 [Source:HGNC Symbol;Acc:HGNC:30635]	protein_coding	0.01902	0.9948	0.06253	0.9995	-0.1056	0.9372
ENSG00000039650	PNKP	polynucleotide kinase 3'-phosphatase [Source:HGNC Symbol;Acc:HGNC:9154]	protein_coding	0.1018	0.9315	0.1173	0.9995	0.1424	0.8339
ENSG00000040199	PHLPP2	PH domain and leucine rich repeat protein phosphatase 2 [Source:HGNC Symbol;Acc:HGNC:29149]	protein_coding	0.3493	0.6449	0.3632	0.9939	0.4299	0.5505
ENSG00000040275	SPDL1	spindle apparatus coiled-coil protein 1 [Source:HGNC Symbol;Acc:HGNC:26010]	protein_coding	0.2127	0.8874	0.2328	0.9995	0.2358	0.7788
ENSG00000040341	STAU2	staufen double-stranded RNA binding protein 2 [Source:HGNC Symbol;Acc:HGNC:11371]	protein_coding	-0.08288	0.9606	-0.06136	0.9995	-0.06642	0.9377
ENSG00000040487	SLC66A1	solute carrier family 66 member 1 [Source:HGNC Symbol;Acc:HGNC:26001]	protein_coding	0.01244	0.9949	0.02952	0.9995	0.04757	0.9606
ENSG00000040531	CTNS	cystinosin, lysosomal cystine transporter [Source:HGNC Symbol;Acc:HGNC:2518]	protein_coding	0.2874	0.7655	0.3041	0.9995	0.3091	0.6972
ENSG00000040608	RTN4R	reticulon 4 receptor [Source:HGNC Symbol;Acc:HGNC:18601]	protein_coding	-0.5517	0.8296	-0.5325	0.9995	-0.3491	0.8454
ENSG00000040633	PHF23	PHD finger protein 23 [Source:HGNC Symbol;Acc:HGNC:28428]	protein_coding	0.408	0.1311	0.4266	0.5769	0.4339	0.5056
ENSG00000040933	INPP4A	inositol polyphosphate-4-phosphatase type I A [Source:HGNC Symbol;Acc:HGNC:6074]	protein_coding	-0.06436	0.9567	-0.04495	0.9995	-0.0488	0.946
ENSG00000041353	RAB27B	RAB27B, member RAS oncogene family [Source:HGNC Symbol;Acc:HGNC:9767]	protein_coding	-0.3753	0.8412	-0.353	0.9995	-0.3763	0.7496
ENSG00000041357	PSMA4	proteasome 20S subunit alpha 4 [Source:HGNC Symbol;Acc:HGNC:9533]	protein_coding	0.08383	0.9715	0.1076	0.9995	0.1918	0.8679
ENSG00000041802	LSG1	large 60S subunit nuclear export GTPase 1 [Source:HGNC Symbol;Acc:HGNC:25652]	protein_coding	-0.1158	0.8994	-0.09631	0.9995	-0.1079	0.8539
ENSG00000041880	PARP3	poly(ADP-ribose) polymerase family member 3 [Source:HGNC Symbol;Acc:HGNC:273]	protein_coding	0.2204	0.8874	0.2377	0.9995	0.3079	0.7405
ENSG00000041982	TNC	tenascin C [Source:HGNC Symbol;Acc:HGNC:5318]	protein_coding	0.1241	0.97	0.1383	0.9995	0.1416	0.946
ENSG00000041988	THAP3	THAP domain containing 3 [Source:HGNC Symbol;Acc:HGNC:20855]	protein_coding	0.1571	0.9096	0.1744	0.9995	0.1753	0.8272
ENSG00000042062	RIPOR3	RIPOR family member 3 [Source:HGNC Symbol;Acc:HGNC:16168]	protein_coding	-0.2708	0.8168	-0.2559	0.9995	-0.2385	0.7748
ENSG00000042088	TDP1	tyrosyl-DNA phosphodiesterase 1 [Source:HGNC Symbol;Acc:HGNC:18884]	protein_coding	0.1374	0.8874	0.1569	0.9995	0.1494	0.7826
ENSG00000042286	AIFM2	apoptosis inducing factor mitochondria associated 2 [Source:HGNC Symbol;Acc:HGNC:21411]	protein_coding	0.4469	0.7358	0.4642	0.9728	0.5234	0.6714
ENSG00000042317		spermatogenesis associated 7 [Source:NCBI gene;Acc:55812]	protein_coding	-0.2859	0.8648	-0.2657	0.9995	-0.2349	0.8272
ENSG00000042429	MED17	mediator complex subunit 17 [Source:HGNC Symbol;Acc:HGNC:2375]	protein_coding	0.1905	0.9338	0.209	0.9995	0.2839	0.8111
ENSG00000042445	RETSAT	retinol saturase [Source:HGNC Symbol;Acc:HGNC:25991]	protein_coding	0.06395	0.9528	0.07867	0.9995	0.08369	0.8894
ENSG00000042493	CAPG	capping actin protein, gelsolin like [Source:HGNC Symbol;Acc:HGNC:1474]	protein_coding	0.1913	0.9214	0.2085	0.9995	0.3344	0.8086
ENSG00000042753	AP2S1	adaptor related protein complex 2 subunit sigma 1 [Source:HGNC Symbol;Acc:HGNC:565]	protein_coding	0.1088	0.9349	0.1251	0.9995	0.1193	0.8782
ENSG00000042832	TG	thyroglobulin [Source:HGNC Symbol;Acc:HGNC:11764]	protein_coding	0.4294	0.7358	0.4503	0.987	0.5216	0.653
ENSG00000042980	ADAM28	ADAM metallopeptidase domain 28 [Source:HGNC Symbol;Acc:HGNC:206]	protein_coding	-0.721	0.434	-0.7015	0.5029	-0.6677	0.5845
ENSG00000043039	BARX2	BARX homeobox 2 [Source:HGNC Symbol;Acc:HGNC:956]	protein_coding	-0.4729	0.8114	-0.4572	0.9995	-0.1237	0.9405
ENSG00000043093	DCUN1D1	defective in cullin neddylation 1 domain containing 1 [Source:HGNC Symbol;Acc:HGNC:18184]	protein_coding	-0.2397	0.8966	-0.2179	0.9995	-0.2727	0.8059
ENSG00000043143	JADE2	jade family PHD finger 2 [Source:HGNC Symbol;Acc:HGNC:22984]	protein_coding	0.1667	0.8966	0.1835	0.9995	0.1901	0.8059
ENSG00000043462	LCP2	lymphocyte cytosolic protein 2 [Source:HGNC Symbol;Acc:HGNC:6529]	protein_coding	0.2406	0.8535	0.2585	0.9995	0.2831	0.7337
ENSG00000043514	TRIT1	tRNA isopentenyltransferase 1 [Source:HGNC Symbol;Acc:HGNC:20286]	protein_coding	-0.1846	0.8497	-0.1627	0.9995	-0.1592	0.7964
ENSG00000044090	CUL7	cullin 7 [Source:HGNC Symbol;Acc:HGNC:21024]	protein_coding	0.2492	0.8845	0.2649	0.9995	0.2986	0.745
ENSG00000044115	CTNNA1	catenin alpha 1 [Source:HGNC Symbol;Acc:HGNC:2509]	protein_coding	-0.02602	0.9872	-0.008818	0.9996	-0.07573	0.928
ENSG00000044446	PHKA2	phosphorylase kinase regulatory subunit alpha 2 [Source:HGNC Symbol;Acc:HGNC:8926]	protein_coding	-0.08303	0.9343	-0.06511	0.9995	-0.06158	0.9223
ENSG00000044459	CNTLN	centlein [Source:HGNC Symbol;Acc:HGNC:23432]	protein_coding	-0.001264	0.9992	0.01891	0.9995	0.13	0.8875
ENSG00000044524	EPHA3	EPH receptor A3 [Source:HGNC Symbol;Acc:HGNC:3387]	protein_coding	-0.2358	0.9412	-0.2114	0.9995	-0.1652	0.938
ENSG00000044574	HSPA5	heat shock protein family A (Hsp70) member 5 [Source:HGNC Symbol;Acc:HGNC:5238]	protein_coding	-0.02022	0.9929	-0.001563	0.9996	0.06721	0.9604
ENSG00000046604	DSG2	desmoglein 2 [Source:HGNC Symbol;Acc:HGNC:3049]	protein_coding	0.4507	0.88	0.4653	0.9995	0.4119	0.8376
ENSG00000046647	GEMIN8	gem nuclear organelle associated protein 8 [Source:HGNC Symbol;Acc:HGNC:26044]	protein_coding	0.004882	0.9985	0.02534	0.9995	-0.004453	0.9952
ENSG00000046651	OFD1	OFD1 centriole and centriolar satellite protein [Source:HGNC Symbol;Acc:HGNC:2567]	protein_coding	-0.1414	0.9217	-0.1215	0.9995	-0.2077	0.7988
ENSG00000046653	GPM6B	glycoprotein M6B [Source:HGNC Symbol;Acc:HGNC:4461]	protein_coding	-0.04681	0.9726	-0.0343	0.9995	0.003145	0.9971
ENSG00000046889	PREX2	phosphatidylinositol-3,4,5-trisphosphate dependent Rac exchange factor 2 [Source:HGNC Symbol;Acc:HGNC:22950]	protein_coding	-0.4491	0.8168	-0.4257	0.9995	-0.1756	0.901
ENSG00000047056	WDR37	WD repeat domain 37 [Source:HGNC Symbol;Acc:HGNC:31406]	protein_coding	0.07979	0.9385	0.1002	0.9995	0.0986	0.8708
ENSG00000047188	YTHDC2	YTH domain containing 2 [Source:HGNC Symbol;Acc:HGNC:24721]	protein_coding	-0.19	0.8874	-0.1675	0.9995	-0.1604	0.8272
ENSG00000047230	CTPS2	CTP synthase 2 [Source:HGNC Symbol;Acc:HGNC:2520]	protein_coding	-0.2759	0.822	-0.2597	0.9995	-0.154	0.8482
ENSG00000047249	ATP6V1H	ATPase H+ transporting V1 subunit H [Source:HGNC Symbol;Acc:HGNC:18303]	protein_coding	0.05901	0.9537	0.07422	0.9995	0.07094	0.9003
ENSG00000047315	POLR2B	RNA polymerase II subunit B [Source:HGNC Symbol;Acc:HGNC:9188]	protein_coding	-0.1601	0.8874	-0.1381	0.9995	-0.1392	0.8325
ENSG00000047346	FAM214A	family with sequence similarity 214 member A [Source:HGNC Symbol;Acc:HGNC:25609]	protein_coding	-0.4118	0.8012	-0.3899	0.9995	-0.4194	0.7157
ENSG00000047365	ARAP2	ArfGAP with RhoGAP domain, ankyrin repeat and PH domain 2 [Source:HGNC Symbol;Acc:HGNC:16924]	protein_coding	-0.1618	0.9075	-0.1383	0.9995	-0.1274	0.8679
ENSG00000047410	TPR	translocated promoter region, nuclear basket protein [Source:HGNC Symbol;Acc:HGNC:12017]	protein_coding	-0.00591	0.996	0.01345	0.9996	0.009261	0.9905
ENSG00000047457	CP	ceruloplasmin [Source:HGNC Symbol;Acc:HGNC:2295]	protein_coding	-0.5968	0.856	-0.58	0.9995	-0.5548	0.8283
ENSG00000047578	KIAA0556	KIAA0556 [Source:HGNC Symbol;Acc:HGNC:29068]	protein_coding	0.1616	0.8744	0.1747	0.9995	0.2177	0.7212
ENSG00000047579	DTNBP1	dystrobrevin binding protein 1 [Source:HGNC Symbol;Acc:HGNC:17328]	protein_coding	0.09383	0.9343	0.1144	0.9995	0.1002	0.8824
ENSG00000047617	ANO2	anoctamin 2 [Source:HGNC Symbol;Acc:HGNC:1183]	protein_coding	-0.2145	0.9462	-0.2051	0.9995	0.1386	0.9426
ENSG00000047621	C12orf4	chromosome 12 open reading frame 4 [Source:HGNC Symbol;Acc:HGNC:1184]	protein_coding	-0.0691	0.9759	-0.04645	0.9995	-0.05277	0.9653
ENSG00000047634	SCML1	Scm polycomb group protein like 1 [Source:HGNC Symbol;Acc:HGNC:10580]	protein_coding	-0.3104	0.7294	-0.2903	0.9995	-0.2899	0.6972
ENSG00000047644	WWC3	WWC family member 3 [Source:HGNC Symbol;Acc:HGNC:29237]	protein_coding	0.1664	0.8958	0.1843	0.9995	0.1682	0.8246
ENSG00000047648	ARHGAP6	Rho GTPase activating protein 6 [Source:HGNC Symbol;Acc:HGNC:676]	protein_coding	-0.4	0.8874	-0.3833	0.9995	-0.0951	0.9564
ENSG00000047662	FAM184B	family with sequence similarity 184 member B [Source:HGNC Symbol;Acc:HGNC:29235]	protein_coding	-0.1562	0.9613	-0.1352	0.9995	0.01318	0.9944
ENSG00000047849	MAP4	microtubule associated protein 4 [Source:HGNC Symbol;Acc:HGNC:6862]	protein_coding	-0.06645	0.9739	-0.05015	0.9995	-0.1426	0.8899
ENSG00000047932	GOPC	golgi associated PDZ and coiled-coil motif containing [Source:HGNC Symbol;Acc:HGNC:17643]	protein_coding	-0.06989	0.9769	-0.05516	0.9995	0.07815	0.9527
ENSG00000048028	USP28	ubiquitin specific peptidase 28 [Source:HGNC Symbol;Acc:HGNC:12625]	protein_coding	0.08754	0.924	0.1078	0.9995	0.113	0.8392
ENSG00000048052	HDAC9	histone deacetylase 9 [Source:HGNC Symbol;Acc:HGNC:14065]	protein_coding	-0.4409	0.6445	-0.419	0.9642	-0.3555	0.6858
ENSG00000048140	TSPAN17	tetraspanin 17 [Source:HGNC Symbol;Acc:HGNC:13594]	protein_coding	0.2265	0.8199	0.2447	0.9995	0.231	0.7411
ENSG00000048342	CC2D2A	coiled-coil and C2 domain containing 2A [Source:HGNC Symbol;Acc:HGNC:29253]	protein_coding	-0.01395	0.9962	-0.002722	0.9996	0.2048	0.8509
ENSG00000048392	RRM2B	ribonucleotide reductase regulatory TP53 inducible subunit M2B [Source:HGNC Symbol;Acc:HGNC:17296]	protein_coding	-0.2433	0.8644	-0.2214	0.9995	-0.2306	0.7841
ENSG00000048405	ZNF800	zinc finger protein 800 [Source:HGNC Symbol;Acc:HGNC:27267]	protein_coding	-0.1193	0.9264	-0.09648	0.9995	-0.1132	0.8761
ENSG00000048471	SNX29	sorting nexin 29 [Source:HGNC Symbol;Acc:HGNC:30542]	protein_coding	-0.3244	0.6468	-0.3085	0.9995	-0.3111	0.6783
ENSG00000048544	MRPS10	mitochondrial ribosomal protein S10 [Source:HGNC Symbol;Acc:HGNC:14502]	protein_coding	-0.02735	0.9872	-0.004472	0.9996	-0.04466	0.9558
ENSG00000048649	RSF1	remodeling and spacing factor 1 [Source:HGNC Symbol;Acc:HGNC:18118]	protein_coding	0.04338	0.9668	0.06362	0.9995	0.06604	0.9097
ENSG00000048707	VPS13D	vacuolar protein sorting 13 homolog D [Source:HGNC Symbol;Acc:HGNC:23595]	protein_coding	-0.1518	0.8951	-0.1344	0.9995	-0.1457	0.8398
ENSG00000048740	CELF2	CUGBP Elav-like family member 2 [Source:HGNC Symbol;Acc:HGNC:2550]	protein_coding	0.03626	0.9721	0.0569	0.9995	0.02311	0.9735
ENSG00000048828	FAM120A	family with sequence similarity 120A [Source:HGNC Symbol;Acc:HGNC:13247]	protein_coding	0.04119	0.9781	0.05796	0.9995	0.01459	0.9867
ENSG00000048991	R3HDM1	R3H domain containing 1 [Source:HGNC Symbol;Acc:HGNC:9757]	protein_coding	0.04899	0.9721	0.06291	0.9995	0.09637	0.8833
ENSG00000049089	COL9A2	collagen type IX alpha 2 chain [Source:HGNC Symbol;Acc:HGNC:2218]	protein_coding	-0.2808	0.8966	-0.2665	0.9995	-0.09704	0.9423
ENSG00000049130	KITLG	KIT ligand [Source:HGNC Symbol;Acc:HGNC:6343]	protein_coding	-0.648	0.5579	-0.6266	0.7678	-0.6564	0.5922
ENSG00000049167	ERCC8	ERCC excision repair 8, CSA ubiquitin ligase complex subunit [Source:HGNC Symbol;Acc:HGNC:3439]	protein_coding	-0.135	0.9359	-0.1147	0.9995	-0.08484	0.936
ENSG00000049192	ADAMTS6	ADAM metallopeptidase with thrombospondin type 1 motif 6 [Source:HGNC Symbol;Acc:HGNC:222]	protein_coding	0.09926	0.9612	0.1138	0.9995	0.1483	0.8862
ENSG00000049239	H6PD	hexose-6-phosphate dehydrogenase/glucose 1-dehydrogenase [Source:HGNC Symbol;Acc:HGNC:4795]	protein_coding	-0.1519	0.9231	-0.1345	0.9995	-0.1817	0.8443
ENSG00000049245	VAMP3	vesicle associated membrane protein 3 [Source:HGNC Symbol;Acc:HGNC:12644]	protein_coding	-0.08214	0.9343	-0.06345	0.9995	-0.1036	0.8609
ENSG00000049246	PER3	period circadian regulator 3 [Source:HGNC Symbol;Acc:HGNC:8847]	protein_coding	-1.204	0.07785	-1.174	0.1133	-0.8899	0.5641
ENSG00000049247	UTS2	urotensin 2 [Source:HGNC Symbol;Acc:HGNC:12636]	protein_coding	-0.7215	0.9173	-0.6888	0.9995	-2.18	0.609
ENSG00000049249	TNFRSF9	TNF receptor superfamily member 9 [Source:HGNC Symbol;Acc:HGNC:11924]	protein_coding	0.7087	0.1187	0.7302	0.2028	0.6788	0.5217
ENSG00000049283	EPN3	epsin 3 [Source:HGNC Symbol;Acc:HGNC:18235]	protein_coding	-0.2326	0.8966	-0.2135	0.9995	-0.1802	0.88
ENSG00000049323	LTBP1	latent transforming growth factor beta binding protein 1 [Source:HGNC Symbol;Acc:HGNC:6714]	protein_coding	-0.1907	0.9524	-0.1756	0.9995	-0.3303	0.8466
ENSG00000049449	RCN1	reticulocalbin 1 [Source:HGNC Symbol;Acc:HGNC:9934]	protein_coding	-0.2615	0.8372	-0.2433	0.9995	-0.2843	0.7411
ENSG00000049540	ELN	elastin [Source:HGNC Symbol;Acc:HGNC:3327]	protein_coding	-1.933	0.284	-1.917	0.1163	-1.714	0.5641
ENSG00000049541	RFC2	replication factor C subunit 2 [Source:HGNC Symbol;Acc:HGNC:9970]	protein_coding	0.08704	0.9246	0.1044	0.9995	0.1068	0.8457
ENSG00000049618	ARID1B	AT-rich interaction domain 1B [Source:HGNC Symbol;Acc:HGNC:18040]	protein_coding	-0.08589	0.9356	-0.07011	0.9995	-0.09749	0.8705
ENSG00000049656	CLPTM1L	CLPTM1 like [Source:HGNC Symbol;Acc:HGNC:24308]	protein_coding	-0.09731	0.9537	-0.0789	0.9995	-0.06251	0.9558
ENSG00000049759	NEDD4L	NEDD4 like E3 ubiquitin protein ligase [Source:HGNC Symbol;Acc:HGNC:7728]	protein_coding	0.1906	0.9412	0.2097	0.9995	0.3102	0.8443
ENSG00000049768	FOXP3	forkhead box P3 [Source:HGNC Symbol;Acc:HGNC:6106]	protein_coding	0.115	0.9724	0.1314	0.9995	0.1961	0.9198
ENSG00000049769	PPP1R3F	protein phosphatase 1 regulatory subunit 3F [Source:HGNC Symbol;Acc:HGNC:14944]	protein_coding	0.1301	0.9537	0.1527	0.9995	0.1118	0.933
ENSG00000049860	HEXB	hexosaminidase subunit beta [Source:HGNC Symbol;Acc:HGNC:4879]	protein_coding	-0.2257	0.7127	-0.2067	0.9995	-0.223	0.6997
ENSG00000049883	PTCD2	pentatricopeptide repeat domain 2 [Source:HGNC Symbol;Acc:HGNC:25734]	protein_coding	-0.1165	0.9175	-0.09006	0.9995	-0.08953	0.8895
ENSG00000050130	JKAMP	JNK1/MAPK8 associated membrane protein [Source:HGNC Symbol;Acc:HGNC:20184]	protein_coding	-0.1766	0.918	-0.1546	0.9995	-0.1775	0.8525
ENSG00000050165	DKK3	dickkopf WNT signaling pathway inhibitor 3 [Source:HGNC Symbol;Acc:HGNC:2893]	protein_coding	0.05231	0.9828	0.06892	0.9995	0.00517	0.9971
ENSG00000050327	ARHGEF5	Rho guanine nucleotide exchange factor 5 [Source:HGNC Symbol;Acc:HGNC:13209]	protein_coding	-0.1214	0.9606	-0.1034	0.9995	0.0481	0.977
ENSG00000050344	NFE2L3	nuclear factor, erythroid 2 like 3 [Source:HGNC Symbol;Acc:HGNC:7783]	protein_coding	-0.1918	0.9051	-0.1672	0.9995	-0.1367	0.8769
ENSG00000050393	MCUR1	mitochondrial calcium uniporter regulator 1 [Source:HGNC Symbol;Acc:HGNC:21097]	protein_coding	-0.4115	0.5966	-0.3895	0.9263	-0.4178	0.5851
ENSG00000050405	LIMA1	LIM domain and actin binding 1 [Source:HGNC Symbol;Acc:HGNC:24636]	protein_coding	0.06085	0.9795	0.07718	0.9995	0.02455	0.9842
ENSG00000050426	LETMD1	LETM1 domain containing 1 [Source:HGNC Symbol;Acc:HGNC:24241]	protein_coding	-0.148	0.8948	-0.126	0.9995	-0.1418	0.8301
ENSG00000050438	SLC4A8	solute carrier family 4 member 8 [Source:HGNC Symbol;Acc:HGNC:11034]	protein_coding	0.01852	0.9929	0.03798	0.9995	0.01959	0.9894
ENSG00000050555	LAMC3	laminin subunit gamma 3 [Source:HGNC Symbol;Acc:HGNC:6494]	protein_coding	0.409	0.8872	0.4255	0.9995	0.6618	0.7009
ENSG00000050628	PTGER3	prostaglandin E receptor 3 [Source:HGNC Symbol;Acc:HGNC:9595]	protein_coding	-0.85	0.6487	-0.8241	0.8545	-0.9286	0.6786
ENSG00000050730	TNIP3	TNFAIP3 interacting protein 3 [Source:HGNC Symbol;Acc:HGNC:19315]	protein_coding	0.9777	0.4095	1.002	0.3987	1.151	0.5384
ENSG00000050748	MAPK9	mitogen-activated protein kinase 9 [Source:HGNC Symbol;Acc:HGNC:6886]	protein_coding	-0.00647	0.9962	0.01367	0.9995	0.01174	0.9857
ENSG00000050767	COL23A1	collagen type XXIII alpha 1 chain [Source:HGNC Symbol;Acc:HGNC:22990]	protein_coding	0.3785	0.8715	0.3961	0.9995	0.4698	0.7365
ENSG00000050820	BCAR1	BCAR1 scaffold protein, Cas family member [Source:HGNC Symbol;Acc:HGNC:971]	protein_coding	0.3105	0.8994	0.3265	0.9995	0.3434	0.8272
ENSG00000051009	FAM160A2	family with sequence similarity 160 member A2 [Source:HGNC Symbol;Acc:HGNC:25378]	protein_coding	-0.009273	0.9949	0.004964	0.9996	0.03255	0.967
ENSG00000051108	HERPUD1	homocysteine inducible ER protein with ubiquitin like domain 1 [Source:HGNC Symbol;Acc:HGNC:13744]	protein_coding	-0.2818	0.9217	-0.2641	0.9995	-0.06051	0.9793
ENSG00000051128	HOMER3	homer scaffold protein 3 [Source:HGNC Symbol;Acc:HGNC:17514]	protein_coding	0.1738	0.9338	0.187	0.9995	0.2806	0.8308
ENSG00000051180	RAD51	RAD51 recombinase [Source:HGNC Symbol;Acc:HGNC:9817]	protein_coding	0.6036	0.3577	0.6171	0.6523	0.6503	0.5217
ENSG00000051341	POLQ	DNA polymerase theta [Source:HGNC Symbol;Acc:HGNC:9186]	protein_coding	0.1746	0.9049	0.198	0.9995	0.1771	0.8339
ENSG00000051382	PIK3CB	phosphatidylinositol-4,5-bisphosphate 3-kinase catalytic subunit beta [Source:HGNC Symbol;Acc:HGNC:8976]	protein_coding	-0.06221	0.9721	-0.04094	0.9995	-0.07804	0.936
ENSG00000051523	CYBA	cytochrome b-245 alpha chain [Source:HGNC Symbol;Acc:HGNC:2577]	protein_coding	0.1506	0.8994	0.166	0.9995	0.2109	0.8038
ENSG00000051596	THOC3	THO complex 3 [Source:HGNC Symbol;Acc:HGNC:19072]	protein_coding	-0.1377	0.9331	-0.1218	0.9995	-0.04251	0.9731
ENSG00000051620	HEBP2	heme binding protein 2 [Source:HGNC Symbol;Acc:HGNC:15716]	protein_coding	0.03743	0.9872	0.05846	0.9995	0.07457	0.946
ENSG00000051825	MPHOSPH9	M-phase phosphoprotein 9 [Source:HGNC Symbol;Acc:HGNC:7215]	protein_coding	0.2143	0.8874	0.2351	0.9995	0.2086	0.8057
ENSG00000052126	PLEKHA5	pleckstrin homology domain containing A5 [Source:HGNC Symbol;Acc:HGNC:30036]	protein_coding	-0.3297	0.8606	-0.3106	0.9995	-0.1649	0.8875
ENSG00000052344	PRSS8	serine protease 8 [Source:HGNC Symbol;Acc:HGNC:9491]	protein_coding	0.2323	0.8874	0.2496	0.9995	0.3392	0.7411
ENSG00000052723	SIKE1	suppressor of IKBKE 1 [Source:HGNC Symbol;Acc:HGNC:26119]	protein_coding	-0.07541	0.9612	-0.05213	0.9995	-0.08678	0.9135
ENSG00000052749	RRP12	ribosomal RNA processing 12 homolog [Source:HGNC Symbol;Acc:HGNC:29100]	protein_coding	-0.11	0.9378	-0.09235	0.9995	-0.06662	0.9392
ENSG00000052795	FNIP2	folliculin interacting protein 2 [Source:HGNC Symbol;Acc:HGNC:29280]	protein_coding	0.4041	0.6025	0.4196	0.9203	0.4537	0.5641
ENSG00000052802	MSMO1	methylsterol monooxygenase 1 [Source:HGNC Symbol;Acc:HGNC:10545]	protein_coding	-0.6711	0.7053	-0.6487	0.9255	-0.5364	0.7278
ENSG00000052841	TTC17	tetratricopeptide repeat domain 17 [Source:HGNC Symbol;Acc:HGNC:25596]	protein_coding	-0.09148	0.9217	-0.07118	0.9995	-0.08206	0.8989
ENSG00000052850	ALX4	ALX homeobox 4 [Source:HGNC Symbol;Acc:HGNC:450]	protein_coding	0.4984	0.8965	0.5053	0.9995	0.7162	0.7234
ENSG00000053108	FSTL4	follistatin like 4 [Source:HGNC Symbol;Acc:HGNC:21389]	protein_coding	1.017	0.8874	0.8871	0.9995	-0.2375	0.9558
ENSG00000053254	FOXN3	forkhead box N3 [Source:HGNC Symbol;Acc:HGNC:1928]	protein_coding	-0.1951	0.7294	-0.1789	0.9995	-0.2226	0.6786
ENSG00000053371	AKR7A2	aldo-keto reductase family 7 member A2 [Source:HGNC Symbol;Acc:HGNC:389]	protein_coding	-0.2269	0.7631	-0.2168	0.9995	-0.1993	0.7411
ENSG00000053372	MRTO4	MRT4 homolog, ribosome maturation factor [Source:HGNC Symbol;Acc:HGNC:18477]	protein_coding	0.03598	0.9805	0.0561	0.9995	0.05014	0.9482
ENSG00000053501	USE1	unconventional SNARE in the ER 1 [Source:HGNC Symbol;Acc:HGNC:30882]	protein_coding	-0.04531	0.9691	-0.01584	0.9995	-0.03416	0.9581
ENSG00000053524	MCF2L2	MCF.2 cell line derived transforming sequence-like 2 [Source:HGNC Symbol;Acc:HGNC:30319]	protein_coding	0.1357	0.9612	0.1444	0.9995	0.4859	0.7411
ENSG00000053747	LAMA3	laminin subunit alpha 3 [Source:HGNC Symbol;Acc:HGNC:6483]	protein_coding	0.6117	0.8874	0.6207	0.9995	0.5597	0.8111
ENSG00000053770	AP5M1	adaptor related protein complex 5 subunit mu 1 [Source:HGNC Symbol;Acc:HGNC:20192]	protein_coding	-0.2869	0.8499	-0.2657	0.9995	-0.2931	0.7617
ENSG00000053900	ANAPC4	anaphase promoting complex subunit 4 [Source:HGNC Symbol;Acc:HGNC:19990]	protein_coding	-0.02141	0.9893	0.001187	0.9996	-0.005064	0.9946
ENSG00000053918	KCNQ1	potassium voltage-gated channel subfamily Q member 1 [Source:HGNC Symbol;Acc:HGNC:6294]	protein_coding	-0.293	0.8362	-0.2747	0.9995	-0.2612	0.7748
ENSG00000054116	TRAPPC3	trafficking protein particle complex 3 [Source:HGNC Symbol;Acc:HGNC:19942]	protein_coding	0.1002	0.9246	0.1193	0.9995	0.1155	0.8528
ENSG00000054118	THRAP3	thyroid hormone receptor associated protein 3 [Source:HGNC Symbol;Acc:HGNC:22964]	protein_coding	0.02511	0.9831	0.04183	0.9995	-0.008046	0.9926
ENSG00000054148	PHPT1	phosphohistidine phosphatase 1 [Source:HGNC Symbol;Acc:HGNC:30033]	protein_coding	-0.09921	0.9349	-0.08211	0.9995	-0.05201	0.9486
ENSG00000054267	ARID4B	AT-rich interaction domain 4B [Source:HGNC Symbol;Acc:HGNC:15550]	protein_coding	-0.0581	0.9612	-0.0361	0.9995	-0.04542	0.9474
ENSG00000054277	OPN3	opsin 3 [Source:HGNC Symbol;Acc:HGNC:14007]	protein_coding	0.09413	0.9787	0.1115	0.9995	0.1091	0.9491
ENSG00000054282	SDCCAG8	serologically defined colon cancer antigen 8 [Source:HGNC Symbol;Acc:HGNC:10671]	protein_coding	-0.06612	0.9466	-0.0465	0.9995	-0.04127	0.946
ENSG00000054392	HHAT	hedgehog acyltransferase [Source:HGNC Symbol;Acc:HGNC:18270]	protein_coding	-0.5535	0.7467	-0.5343	0.9995	-0.4523	0.7399
ENSG00000054523	KIF1B	kinesin family member 1B [Source:HGNC Symbol;Acc:HGNC:16636]	protein_coding	0.09165	0.9341	0.1088	0.9995	0.1054	0.8649
ENSG00000054598	FOXC1	forkhead box C1 [Source:HGNC Symbol;Acc:HGNC:3800]	protein_coding	0.05044	0.9904	0.07342	0.9995	0.5786	0.7411
ENSG00000054611	TBC1D22A	TBC1 domain family member 22A [Source:HGNC Symbol;Acc:HGNC:1309]	protein_coding	0.1049	0.9199	0.1219	0.9995	0.1157	0.8458
ENSG00000054654	SYNE2	spectrin repeat containing nuclear envelope protein 2 [Source:HGNC Symbol;Acc:HGNC:17084]	protein_coding	-0.1146	0.9466	-0.09317	0.9995	-0.06039	0.9553
ENSG00000054690	PLEKHH1	pleckstrin homology, MyTH4 and FERM domain containing H1 [Source:HGNC Symbol;Acc:HGNC:17733]	protein_coding	-0.4431	0.8966	-0.426	0.9995	-0.3583	0.8635
ENSG00000054793	ATP9A	ATPase phospholipid transporting 9A (putative) [Source:HGNC Symbol;Acc:HGNC:13540]	protein_coding	0.08702	0.9553	0.106	0.9995	0.1676	0.8327
ENSG00000054938	CHRDL2	chordin like 2 [Source:HGNC Symbol;Acc:HGNC:24168]	protein_coding	-1.686	0.6053	-1.648	0.8344	-1.356	0.6786
ENSG00000054965	FAM168A	family with sequence similarity 168 member A [Source:HGNC Symbol;Acc:HGNC:28999]	protein_coding	-0.2305	0.8412	-0.2144	0.9995	-0.1699	0.8292
ENSG00000054967	RELT	RELT TNF receptor [Source:HGNC Symbol;Acc:HGNC:13764]	protein_coding	0.2222	0.8994	0.2418	0.9995	0.3207	0.7692
ENSG00000054983	GALC	galactosylceramidase [Source:HGNC Symbol;Acc:HGNC:4115]	protein_coding	-0.1346	0.9315	-0.1129	0.9995	-0.09685	0.9156
ENSG00000055044	NOP58	NOP58 ribonucleoprotein [Source:HGNC Symbol;Acc:HGNC:29926]	protein_coding	-0.09711	0.9583	-0.07478	0.9995	-0.05167	0.9606
ENSG00000055118	KCNH2	potassium voltage-gated channel subfamily H member 2 [Source:HGNC Symbol;Acc:HGNC:6251]	protein_coding	0.319	0.9528	0.3244	0.9995	0.1617	0.9642
ENSG00000055130	CUL1	cullin 1 [Source:HGNC Symbol;Acc:HGNC:2551]	protein_coding	0.157	0.8606	0.1764	0.9995	0.1322	0.8237
ENSG00000055147	FAM114A2	family with sequence similarity 114 member A2 [Source:HGNC Symbol;Acc:HGNC:1333]	protein_coding	-0.07235	0.9612	-0.05068	0.9995	-0.07813	0.9244
ENSG00000055163	CYFIP2	cytoplasmic FMR1 interacting protein 2 [Source:HGNC Symbol;Acc:HGNC:13760]	protein_coding	0.002529	0.9992	0.02023	0.9995	0.08989	0.936
ENSG00000055208	TAB2	TGF-beta activated kinase 1 (MAP3K7) binding protein 2 [Source:HGNC Symbol;Acc:HGNC:17075]	protein_coding	-0.02509	0.9827	-0.004918	0.9996	-0.02323	0.9721
ENSG00000055211	GINM1	glycoprotein integral membrane 1 [Source:HGNC Symbol;Acc:HGNC:21074]	protein_coding	-0.1942	0.8965	-0.1732	0.9995	-0.1465	0.8657
ENSG00000055332	EIF2AK2	eukaryotic translation initiation factor 2 alpha kinase 2 [Source:HGNC Symbol;Acc:HGNC:9437]	protein_coding	0.14	0.9098	0.161	0.9995	0.1343	0.841
ENSG00000055483		ubiquitin specific peptidase 36 [Source:NCBI gene;Acc:57602]	protein_coding	-0.1005	0.939	-0.08252	0.9995	-0.08354	0.9144
ENSG00000055609	KMT2C	lysine methyltransferase 2C [Source:HGNC Symbol;Acc:HGNC:13726]	protein_coding	-0.193	0.8874	-0.1749	0.9995	-0.1704	0.8365
ENSG00000055917	PUM2	pumilio RNA binding family member 2 [Source:HGNC Symbol;Acc:HGNC:14958]	protein_coding	-0.09778	0.9331	-0.07538	0.9995	-0.09113	0.8953
ENSG00000055950	MRPL43	mitochondrial ribosomal protein L43 [Source:HGNC Symbol;Acc:HGNC:14517]	protein_coding	0.007765	0.9949	0.0264	0.9995	0.02856	0.9661
ENSG00000056050	HPF1	histone PARylation factor 1 [Source:HGNC Symbol;Acc:HGNC:26051]	protein_coding	0.02521	0.9904	0.04979	0.9995	0.008196	0.9941
ENSG00000056097	ZFR	zinc finger RNA binding protein [Source:HGNC Symbol;Acc:HGNC:17277]	protein_coding	-0.1411	0.8965	-0.1196	0.9995	-0.1202	0.8489
ENSG00000056277	ZNF280C	zinc finger protein 280C [Source:HGNC Symbol;Acc:HGNC:25955]	protein_coding	-0.3257	0.8488	-0.3021	0.9995	-0.151	0.8889
ENSG00000056558	TRAF1	TNF receptor associated factor 1 [Source:HGNC Symbol;Acc:HGNC:12031]	protein_coding	0.3477	0.8176	0.3658	0.9995	0.3417	0.7487
ENSG00000056586	RC3H2	ring finger and CCCH-type domains 2 [Source:HGNC Symbol;Acc:HGNC:21461]	protein_coding	-0.1578	0.8874	-0.1369	0.9995	-0.1334	0.8292
ENSG00000056736	IL17RB	interleukin 17 receptor B [Source:HGNC Symbol;Acc:HGNC:18015]	protein_coding	0.1063	0.9385	0.1331	0.9995	0.07399	0.9288
ENSG00000056972	TRAF3IP2	TRAF3 interacting protein 2 [Source:HGNC Symbol;Acc:HGNC:1343]	protein_coding	-0.03581	0.9831	-0.01982	0.9995	-0.01937	0.983
ENSG00000056998	GYG2	glycogenin 2 [Source:HGNC Symbol;Acc:HGNC:4700]	protein_coding	0.2023	0.9609	0.2262	0.9995	-0.1181	0.9548
ENSG00000057019	DCBLD2	discoidin, CUB and LCCL domain containing 2 [Source:HGNC Symbol;Acc:HGNC:24627]	protein_coding	-0.09785	0.977	-0.1091	0.9995	0.2456	0.8751
ENSG00000057252	SOAT1	sterol O-acyltransferase 1 [Source:HGNC Symbol;Acc:HGNC:11177]	protein_coding	-0.03759	0.9875	-0.01602	0.9996	0.03822	0.9776
ENSG00000057294	PKP2	plakophilin 2 [Source:HGNC Symbol;Acc:HGNC:9024]	protein_coding	-0.1695	0.9612	-0.1557	0.9995	-0.1277	0.9564
ENSG00000057608	GDI2	GDP dissociation inhibitor 2 [Source:HGNC Symbol;Acc:HGNC:4227]	protein_coding	-0.02158	0.9893	-0.0006575	0.9996	0.07454	0.9244
ENSG00000057663	ATG5	autophagy related 5 [Source:HGNC Symbol;Acc:HGNC:589]	protein_coding	0.03832	0.9852	0.0612	0.9995	0.08447	0.9371
ENSG00000057704	TMCC3	transmembrane and coiled-coil domain family 3 [Source:HGNC Symbol;Acc:HGNC:29199]	protein_coding	-0.02606	0.9904	-0.009345	0.9996	0.03179	0.979
ENSG00000057757	PITHD1	PITH domain containing 1 [Source:HGNC Symbol;Acc:HGNC:25022]	protein_coding	-0.1728	0.8532	-0.15	0.9995	-0.1594	0.7965
ENSG00000057935	MTA3	metastasis associated 1 family member 3 [Source:HGNC Symbol;Acc:HGNC:23784]	protein_coding	-0.3427	0.5321	-0.3268	0.987	-0.3031	0.6624
ENSG00000058056	USP13	ubiquitin specific peptidase 13 [Source:HGNC Symbol;Acc:HGNC:12611]	protein_coding	-0.1516	0.9132	-0.1415	0.9995	-0.02401	0.9804
ENSG00000058063	ATP11B	ATPase phospholipid transporting 11B (putative) [Source:HGNC Symbol;Acc:HGNC:13553]	protein_coding	-0.2193	0.8644	-0.1972	0.9995	-0.1906	0.8181
ENSG00000058085	LAMC2	laminin subunit gamma 2 [Source:HGNC Symbol;Acc:HGNC:6493]	protein_coding	0.9438	0.8362	0.9511	0.9995	1.073	0.7305
ENSG00000058091	CDK14	cyclin dependent kinase 14 [Source:HGNC Symbol;Acc:HGNC:8883]	protein_coding	-0.2637	0.8599	-0.2434	0.9995	-0.2112	0.8101
ENSG00000058262	SEC61A1	SEC61 translocon alpha 1 subunit [Source:HGNC Symbol;Acc:HGNC:18276]	protein_coding	-0.1468	0.9606	-0.1267	0.9995	0.01546	0.9936
ENSG00000058272	PPP1R12A	protein phosphatase 1 regulatory subunit 12A [Source:HGNC Symbol;Acc:HGNC:7618]	protein_coding	0.006143	0.9968	0.02796	0.9995	0.02713	0.9721
ENSG00000058335	RASGRF1	Ras protein specific guanine nucleotide releasing factor 1 [Source:HGNC Symbol;Acc:HGNC:9875]	protein_coding	0.1633	0.9426	0.1796	0.9995	0.2532	0.8335
ENSG00000058453	CROCC	ciliary rootlet coiled-coil, rootletin [Source:HGNC Symbol;Acc:HGNC:21299]	protein_coding	-0.2983	0.8372	-0.2816	0.9995	-0.2775	0.7719
ENSG00000058600	POLR3E	RNA polymerase III subunit E [Source:HGNC Symbol;Acc:HGNC:30347]	protein_coding	-0.02546	0.9805	-0.00406	0.9996	-0.02034	0.9763
ENSG00000058668	ATP2B4	ATPase plasma membrane Ca2+ transporting 4 [Source:HGNC Symbol;Acc:HGNC:817]	protein_coding	-0.04361	0.977	-0.02521	0.9995	-0.05676	0.9483
ENSG00000058729	RIOK2	RIO kinase 2 [Source:HGNC Symbol;Acc:HGNC:18999]	protein_coding	-0.06081	0.9765	-0.03939	0.9995	-0.06706	0.9504
ENSG00000058799	YIPF1	Yip1 domain family member 1 [Source:HGNC Symbol;Acc:HGNC:25231]	protein_coding	-0.2101	0.8285	-0.1883	0.9995	-0.1888	0.7746
ENSG00000058804	NDC1	NDC1 transmembrane nucleoporin [Source:HGNC Symbol;Acc:HGNC:25525]	protein_coding	0.02156	0.9904	0.0442	0.9995	0.02862	0.9768
ENSG00000058866	DGKG	diacylglycerol kinase gamma [Source:HGNC Symbol;Acc:HGNC:2853]	protein_coding	-0.07452	0.9755	-0.06993	0.9995	0.1463	0.9045
ENSG00000059122	FLYWCH1	FLYWCH-type zinc finger 1 [Source:HGNC Symbol;Acc:HGNC:25404]	protein_coding	0.1015	0.9628	0.1185	0.9995	0.09066	0.946
ENSG00000059145	UNKL	unk like zinc finger [Source:HGNC Symbol;Acc:HGNC:14184]	protein_coding	-0.3964	0.3391	-0.3803	0.9411	-0.3539	0.5641
ENSG00000059377	TBXAS1	thromboxane A synthase 1 [Source:HGNC Symbol;Acc:HGNC:11609]	protein_coding	-0.03868	0.9805	-0.02039	0.9995	-0.004821	0.9952
ENSG00000059378	PARP12	poly(ADP-ribose) polymerase family member 12 [Source:HGNC Symbol;Acc:HGNC:21919]	protein_coding	0.3017	0.8114	0.3202	0.9995	0.3041	0.7317
ENSG00000059573	ALDH18A1	aldehyde dehydrogenase 18 family member A1 [Source:HGNC Symbol;Acc:HGNC:9722]	protein_coding	-0.1628	0.9023	-0.1451	0.9995	-0.1356	0.87
ENSG00000059588	TARBP1	TAR (HIV-1) RNA binding protein 1 [Source:HGNC Symbol;Acc:HGNC:11568]	protein_coding	-0.1907	0.8497	-0.1681	0.9995	-0.195	0.75
ENSG00000059691	GATB	glutamyl-tRNA amidotransferase subunit B [Source:HGNC Symbol;Acc:HGNC:8849]	protein_coding	-0.04869	0.97	-0.02516	0.9995	-0.0525	0.9405
ENSG00000059728	MXD1	MAX dimerization protein 1 [Source:HGNC Symbol;Acc:HGNC:6761]	protein_coding	0.2164	0.9132	0.2371	0.9995	0.2388	0.841
ENSG00000059758	CDK17	cyclin dependent kinase 17 [Source:HGNC Symbol;Acc:HGNC:8750]	protein_coding	-0.1884	0.9081	-0.1676	0.9995	-0.1341	0.88
ENSG00000059804	SLC2A3	solute carrier family 2 member 3 [Source:HGNC Symbol;Acc:HGNC:11007]	protein_coding	0.4648	0.8639	0.4869	0.9995	0.5872	0.7552
ENSG00000059915	PSD	pleckstrin and Sec7 domain containing [Source:HGNC Symbol;Acc:HGNC:9507]	protein_coding	0.4883	0.8072	0.5001	0.9995	0.5691	0.6966
ENSG00000060069	CTDP1	CTD phosphatase subunit 1 [Source:HGNC Symbol;Acc:HGNC:2498]	protein_coding	0.1594	0.9034	0.1764	0.9995	0.2059	0.7785
ENSG00000060138	YBX3	Y-box binding protein 3 [Source:HGNC Symbol;Acc:HGNC:2428]	protein_coding	0.03004	0.9845	0.04785	0.9995	-0.03268	0.9709
ENSG00000060140	STYK1	serine/threonine/tyrosine kinase 1 [Source:HGNC Symbol;Acc:HGNC:18889]	protein_coding	0.5828	0.6455	0.6009	0.8368	0.4872	0.6997
ENSG00000060237	WNK1	WNK lysine deficient protein kinase 1 [Source:HGNC Symbol;Acc:HGNC:14540]	protein_coding	-0.04043	0.9795	-0.02302	0.9995	-0.05875	0.946
ENSG00000060339	CCAR1	cell division cycle and apoptosis regulator 1 [Source:HGNC Symbol;Acc:HGNC:24236]	protein_coding	-0.04206	0.9612	-0.02042	0.9995	-0.02842	0.9604
ENSG00000060491	OGFR	opioid growth factor receptor [Source:HGNC Symbol;Acc:HGNC:15768]	protein_coding	0.506	0.4535	0.5235	0.6741	0.4902	0.5687
ENSG00000060558	GNA15	G protein subunit alpha 15 [Source:HGNC Symbol;Acc:HGNC:4383]	protein_coding	0.4148	0.7358	0.4316	0.9728	0.4789	0.6722
ENSG00000060642	PIGV	phosphatidylinositol glycan anchor biosynthesis class V [Source:HGNC Symbol;Acc:HGNC:26031]	protein_coding	-0.02265	0.9904	-0.003848	0.9996	-0.0128	0.9904
ENSG00000060656	PTPRU	protein tyrosine phosphatase receptor type U [Source:HGNC Symbol;Acc:HGNC:9683]	protein_coding	0.1343	0.9694	0.1527	0.9995	0.3909	0.8301
ENSG00000060688	SNRNP40	small nuclear ribonucleoprotein U5 subunit 40 [Source:HGNC Symbol;Acc:HGNC:30857]	protein_coding	0.1004	0.8899	0.126	0.9995	0.1193	0.812
ENSG00000060709	RIMBP2	RIMS binding protein 2 [Source:HGNC Symbol;Acc:HGNC:30339]	protein_coding	-1.315	0.722	-1.292	0.9412	-1.529	0.6397
ENSG00000060718	COL11A1	collagen type XI alpha 1 chain [Source:HGNC Symbol;Acc:HGNC:2186]	protein_coding	-1.929	0.2706	-1.899	0.3512	-1.291	0.703
ENSG00000060749	QSER1	glutamine and serine rich 1 [Source:HGNC Symbol;Acc:HGNC:26154]	protein_coding	-0.1908	0.8874	-0.1697	0.9995	-0.16	0.8341
ENSG00000060762	MPC1	mitochondrial pyruvate carrier 1 [Source:HGNC Symbol;Acc:HGNC:21606]	protein_coding	-0.1807	0.8936	-0.1585	0.9995	-0.1687	0.8325
ENSG00000060971	ACAA1	acetyl-CoA acyltransferase 1 [Source:HGNC Symbol;Acc:HGNC:82]	protein_coding	-0.06973	0.9524	-0.05247	0.9995	-0.0351	0.9606
ENSG00000060982	BCAT1	branched chain amino acid transaminase 1 [Source:HGNC Symbol;Acc:HGNC:976]	protein_coding	0.09868	0.9573	0.118	0.9995	0.1576	0.8562
ENSG00000061273	HDAC7	histone deacetylase 7 [Source:HGNC Symbol;Acc:HGNC:14067]	protein_coding	0.2706	0.7446	0.2878	0.9995	0.2402	0.7364
ENSG00000061337	LZTS1	leucine zipper tumor suppressor 1 [Source:HGNC Symbol;Acc:HGNC:13861]	protein_coding	0.04797	0.9852	0.06538	0.9995	0.1998	0.8726
ENSG00000061656	SPAG4	sperm associated antigen 4 [Source:HGNC Symbol;Acc:HGNC:11214]	protein_coding	-0.5534	0.8619	-0.5342	0.9995	-0.4507	0.8379
ENSG00000061676	NCKAP1	NCK associated protein 1 [Source:HGNC Symbol;Acc:HGNC:7666]	protein_coding	-0.239	0.8089	-0.2198	0.9995	-0.2401	0.7163
ENSG00000061794	MRPS35	mitochondrial ribosomal protein S35 [Source:HGNC Symbol;Acc:HGNC:16635]	protein_coding	-0.0635	0.9612	-0.04283	0.9995	-0.04277	0.9548
ENSG00000061918	GUCY1B1	guanylate cyclase 1 soluble subunit beta 1 [Source:HGNC Symbol;Acc:HGNC:4687]	protein_coding	-0.2176	0.8899	-0.199	0.9995	-0.1817	0.8457
ENSG00000061936	SFSWAP	splicing factor SWAP [Source:HGNC Symbol;Acc:HGNC:10790]	protein_coding	0.03844	0.9732	0.05356	0.9995	0.03865	0.9504
ENSG00000061938	TNK2	tyrosine kinase non receptor 2 [Source:HGNC Symbol;Acc:HGNC:19297]	protein_coding	0.2439	0.7467	0.2617	0.9995	0.2366	0.7154
ENSG00000061987	MON2	MON2 homolog, regulator of endosome-to-Golgi trafficking [Source:HGNC Symbol;Acc:HGNC:29177]	protein_coding	-0.3642	0.6796	-0.3432	0.9753	-0.3371	0.6786
ENSG00000062038	CDH3	cadherin 3 [Source:HGNC Symbol;Acc:HGNC:1762]	protein_coding	0.1766	0.9606	0.1898	0.9995	0.09754	0.9656
ENSG00000062096	ARSF	arylsulfatase F [Source:HGNC Symbol;Acc:HGNC:721]	protein_coding	-1.18	0.8355	-1.171	0.9995	-2.009	0.5427
ENSG00000062194	GPBP1	GC-rich promoter binding protein 1 [Source:HGNC Symbol;Acc:HGNC:29520]	protein_coding	-0.04895	0.9775	-0.02639	0.9995	-0.01018	0.9932
ENSG00000062282	DGAT2	diacylglycerol O-acyltransferase 2 [Source:HGNC Symbol;Acc:HGNC:16940]	protein_coding	-0.5597	0.7435	-0.5399	0.9753	-0.6225	0.6786
ENSG00000062370	ZNF112	zinc finger protein 112 [Source:HGNC Symbol;Acc:HGNC:12892]	protein_coding	-0.1985	0.9331	-0.1748	0.9995	-0.1529	0.9141
ENSG00000062485	CS	citrate synthase [Source:HGNC Symbol;Acc:HGNC:2422]	protein_coding	-0.07261	0.9606	-0.05503	0.9995	-0.1025	0.8895
ENSG00000062524	LTK	leukocyte receptor tyrosine kinase [Source:HGNC Symbol;Acc:HGNC:6721]	protein_coding	0.2462	0.9199	0.2585	0.9995	0.4579	0.7226
ENSG00000062598	ELMO2	engulfment and cell motility 2 [Source:HGNC Symbol;Acc:HGNC:17233]	protein_coding	0.3127	0.6376	0.3295	0.9753	0.2965	0.6681
ENSG00000062650	WAPL	WAPL cohesin release factor [Source:HGNC Symbol;Acc:HGNC:23293]	protein_coding	0.0113	0.9934	0.03241	0.9995	0.02268	0.9768
ENSG00000062716	VMP1	vacuole membrane protein 1 [Source:HGNC Symbol;Acc:HGNC:29559]	protein_coding	0.08839	0.9331	0.1091	0.9995	0.127	0.8335
ENSG00000062725	APPBP2	amyloid beta precursor protein binding protein 2 [Source:HGNC Symbol;Acc:HGNC:622]	protein_coding	-0.07573	0.9606	-0.05523	0.9995	-0.04736	0.9546
ENSG00000062822	POLD1	DNA polymerase delta 1, catalytic subunit [Source:HGNC Symbol;Acc:HGNC:9175]	protein_coding	0.2685	0.8648	0.2829	0.9995	0.3908	0.6858
ENSG00000063046	EIF4B	eukaryotic translation initiation factor 4B [Source:HGNC Symbol;Acc:HGNC:3285]	protein_coding	-0.5212	0.4054	-0.5007	0.8328	-0.4208	0.6136
ENSG00000063127	SLC6A16	solute carrier family 6 member 16 [Source:HGNC Symbol;Acc:HGNC:13622]	protein_coding	-0.1213	0.9583	-0.1009	0.9995	-0.05136	0.967
ENSG00000063169	BICRA	BRD4 interacting chromatin remodeling complex associated protein [Source:HGNC Symbol;Acc:HGNC:4332]	protein_coding	0.3553	0.6053	0.3696	0.9753	0.4116	0.5641
ENSG00000063176	SPHK2	sphingosine kinase 2 [Source:HGNC Symbol;Acc:HGNC:18859]	protein_coding	0.1444	0.905	0.1592	0.9995	0.1913	0.7809
ENSG00000063177	RPL18	ribosomal protein L18 [Source:HGNC Symbol;Acc:HGNC:10310]	protein_coding	-0.1615	0.8874	-0.1426	0.9995	0.0643	0.9277
ENSG00000063180	CA11	carbonic anhydrase 11 [Source:HGNC Symbol;Acc:HGNC:1370]	protein_coding	-0.07865	0.977	-0.06459	0.9995	-0.0853	0.9545
ENSG00000063241	ISOC2	isochorismatase domain containing 2 [Source:HGNC Symbol;Acc:HGNC:26278]	protein_coding	-0.07098	0.9606	-0.05484	0.9995	-0.03817	0.9643
ENSG00000063244	U2AF2	U2 small nuclear RNA auxiliary factor 2 [Source:HGNC Symbol;Acc:HGNC:23156]	protein_coding	0.2714	0.7446	0.287	0.9995	0.2531	0.7262
ENSG00000063245	EPN1	epsin 1 [Source:HGNC Symbol;Acc:HGNC:21604]	protein_coding	0.2065	0.8966	0.2231	0.9995	0.199	0.8335
ENSG00000063322	MED29	mediator complex subunit 29 [Source:HGNC Symbol;Acc:HGNC:23074]	protein_coding	0.01274	0.9904	0.02737	0.9995	0.02148	0.9728
ENSG00000063587	ZNF275	zinc finger protein 275 [Source:HGNC Symbol;Acc:HGNC:13069]	protein_coding	-0.3284	0.8117	-0.3097	0.9995	-0.2612	0.7838
ENSG00000063601	MTMR1	myotubularin related protein 1 [Source:HGNC Symbol;Acc:HGNC:7449]	protein_coding	-0.1415	0.8874	-0.1226	0.9995	-0.111	0.8412
ENSG00000063660	GPC1	glypican 1 [Source:HGNC Symbol;Acc:HGNC:4449]	protein_coding	-0.2354	0.9174	-0.2192	0.9995	-0.09004	0.9504
ENSG00000063761	ADCK1	aarF domain containing kinase 1 [Source:HGNC Symbol;Acc:HGNC:19038]	protein_coding	-0.4552	0.6897	-0.4418	0.9995	-0.3357	0.745
ENSG00000063854	HAGH	hydroxyacylglutathione hydrolase [Source:HGNC Symbol;Acc:HGNC:4805]	protein_coding	0.1085	0.9211	0.1269	0.9995	0.1307	0.841
ENSG00000063978	RNF4	ring finger protein 4 [Source:HGNC Symbol;Acc:HGNC:10067]	protein_coding	0.1411	0.8854	0.1573	0.9995	0.1211	0.8283
ENSG00000064012	CASP8	caspase 8 [Source:HGNC Symbol;Acc:HGNC:1509]	protein_coding	-0.2965	0.7521	-0.2754	0.9995	-0.275	0.7043
ENSG00000064042	LIMCH1	LIM and calponin homology domains 1 [Source:HGNC Symbol;Acc:HGNC:29191]	protein_coding	-0.7116	0.4151	-0.6916	0.6506	-0.764	0.5641
ENSG00000064102	INTS13	integrator complex subunit 13 [Source:HGNC Symbol;Acc:HGNC:20174]	protein_coding	-0.002656	0.9992	0.01883	0.9995	-0.008846	0.9932
ENSG00000064115	TM7SF3	transmembrane 7 superfamily member 3 [Source:HGNC Symbol;Acc:HGNC:23049]	protein_coding	-0.2143	0.8538	-0.1944	0.9995	-0.1873	0.8059
ENSG00000064195	DLX3	distal-less homeobox 3 [Source:HGNC Symbol;Acc:HGNC:2916]	protein_coding	-0.7201	0.6634	-0.7004	0.9255	-0.5386	0.7748
ENSG00000064201	TSPAN32	tetraspanin 32 [Source:HGNC Symbol;Acc:HGNC:13410]	protein_coding	0.01054	0.9985	0.02489	0.9995	0.03415	0.9876
ENSG00000064205	CCN5	cellular communication network factor 5 [Source:HGNC Symbol;Acc:HGNC:12770]	protein_coding	-2.732	0.1552	-2.716	0.03929	-2.971	0.5209
ENSG00000064218	DMRT3	doublesex and mab-3 related transcription factor 3 [Source:HGNC Symbol;Acc:HGNC:13909]	protein_coding	0.8422	0.8168	0.8441	0.9995	0.8	0.7748
ENSG00000064225	ST3GAL6	ST3 beta-galactoside alpha-2,3-sialyltransferase 6 [Source:HGNC Symbol;Acc:HGNC:18080]	protein_coding	-0.2484	0.9158	-0.2261	0.9995	-0.2912	0.841
ENSG00000064270	ATP2C2	ATPase secretory pathway Ca2+ transporting 2 [Source:HGNC Symbol;Acc:HGNC:29103]	protein_coding	-0.317	0.8899	-0.2947	0.9995	-0.406	0.794
ENSG00000064300	NGFR	nerve growth factor receptor [Source:HGNC Symbol;Acc:HGNC:7809]	protein_coding	-0.605	0.8532	-0.58	0.9995	-0.01299	0.9954
ENSG00000064309	CDON	cell adhesion associated, oncogene regulated [Source:HGNC Symbol;Acc:HGNC:17104]	protein_coding	-0.8746	0.6468	-0.8519	0.8724	-0.6993	0.717
ENSG00000064313	TAF2	TATA-box binding protein associated factor 2 [Source:HGNC Symbol;Acc:HGNC:11536]	protein_coding	-0.1802	0.88	-0.1584	0.9995	-0.1648	0.8008
ENSG00000064393	HIPK2	homeodomain interacting protein kinase 2 [Source:HGNC Symbol;Acc:HGNC:14402]	protein_coding	0.09087	0.9612	0.1096	0.9995	0.08056	0.9414
ENSG00000064419	TNPO3	transportin 3 [Source:HGNC Symbol;Acc:HGNC:17103]	protein_coding	0.115	0.8994	0.1329	0.9995	0.1225	0.8283
ENSG00000064490	RFXANK	regulatory factor X associated ankyrin containing protein [Source:HGNC Symbol;Acc:HGNC:9987]	protein_coding	0.3055	0.8041	0.3208	0.9995	0.3435	0.6947
ENSG00000064545	TMEM161A	transmembrane protein 161A [Source:HGNC Symbol;Acc:HGNC:26020]	protein_coding	0.01467	0.9949	0.03008	0.9995	0.0841	0.9372
ENSG00000064547	LPAR2	lysophosphatidic acid receptor 2 [Source:HGNC Symbol;Acc:HGNC:3168]	protein_coding	0.2247	0.8874	0.2418	0.9995	0.206	0.832
ENSG00000064601	CTSA	cathepsin A [Source:HGNC Symbol;Acc:HGNC:9251]	protein_coding	-0.007632	0.9973	0.008332	0.9996	-0.05489	0.9581
ENSG00000064607	SUGP2	SURP and G-patch domain containing 2 [Source:HGNC Symbol;Acc:HGNC:18641]	protein_coding	0.2222	0.3577	0.2436	0.9995	0.227	0.6182
ENSG00000064651	SLC12A2	solute carrier family 12 member 2 [Source:HGNC Symbol;Acc:HGNC:10911]	protein_coding	-0.3753	0.7467	-0.357	0.9995	-0.2243	0.826
ENSG00000064652	SNX24	sorting nexin 24 [Source:HGNC Symbol;Acc:HGNC:21533]	protein_coding	-0.1735	0.8705	-0.1592	0.9995	-0.1088	0.8626
ENSG00000064655	EYA2	EYA transcriptional coactivator and phosphatase 2 [Source:HGNC Symbol;Acc:HGNC:3520]	protein_coding	-0.8197	0.6468	-0.7976	0.9324	-0.6029	0.7201
ENSG00000064666	CNN2	calponin 2 [Source:HGNC Symbol;Acc:HGNC:2156]	protein_coding	0.1881	0.9089	0.2032	0.9995	0.1861	0.8549
ENSG00000064687	ABCA7	ATP binding cassette subfamily A member 7 [Source:HGNC Symbol;Acc:HGNC:37]	protein_coding	-0.00719	0.9982	0.008127	0.9996	0.01589	0.9905
ENSG00000064692	SNCAIP	synuclein alpha interacting protein [Source:HGNC Symbol;Acc:HGNC:11139]	protein_coding	-0.4378	0.8874	-0.4171	0.9995	-0.09432	0.957
ENSG00000064703	DDX20	DEAD-box helicase 20 [Source:HGNC Symbol;Acc:HGNC:2743]	protein_coding	-0.02032	0.989	0.0064	0.9996	-0.03699	0.9583
ENSG00000064726	BTBD1	BTB domain containing 1 [Source:HGNC Symbol;Acc:HGNC:1120]	protein_coding	-0.08767	0.9537	-0.06589	0.9995	-0.07179	0.9321
ENSG00000064763	FAR2	fatty acyl-CoA reductase 2 [Source:HGNC Symbol;Acc:HGNC:25531]	protein_coding	-0.4543	0.8653	-0.4308	0.9995	-0.2079	0.8953
ENSG00000064787	BCAS1	breast carcinoma amplified sequence 1 [Source:HGNC Symbol;Acc:HGNC:974]	protein_coding	0.007464	0.9992	0.02795	0.9996	0.06552	0.9743
ENSG00000064886	CHI3L2	chitinase 3 like 2 [Source:HGNC Symbol;Acc:HGNC:1933]	protein_coding	-0.2543	0.9199	-0.2357	0.9995	-0.1038	0.9553
ENSG00000064932	SBNO2	strawberry notch homolog 2 [Source:HGNC Symbol;Acc:HGNC:29158]	protein_coding	0.3819	0.7435	0.3994	0.9995	0.3614	0.703
ENSG00000064933	PMS1	PMS1 homolog 1, mismatch repair system component [Source:HGNC Symbol;Acc:HGNC:9121]	protein_coding	-0.246	0.8744	-0.2238	0.9995	-0.2895	0.7411
ENSG00000064961	HMG20B	high mobility group 20B [Source:HGNC Symbol;Acc:HGNC:5002]	protein_coding	0.1862	0.8619	0.2019	0.9995	0.2166	0.7467
ENSG00000064989	CALCRL	calcitonin receptor like receptor [Source:HGNC Symbol;Acc:HGNC:16709]	protein_coding	-0.006259	0.9992	0.01638	0.9996	0.1122	0.9383
ENSG00000064995	TAF11	TATA-box binding protein associated factor 11 [Source:HGNC Symbol;Acc:HGNC:11544]	protein_coding	0.00476	0.9985	0.02263	0.9995	0.04819	0.957
ENSG00000064999	ANKS1A	ankyrin repeat and sterile alpha motif domain containing 1A [Source:HGNC Symbol;Acc:HGNC:20961]	protein_coding	-0.1528	0.9023	-0.1374	0.9995	-0.1016	0.8913
ENSG00000065000	AP3D1	adaptor related protein complex 3 subunit delta 1 [Source:HGNC Symbol;Acc:HGNC:568]	protein_coding	0.1786	0.8874	0.1947	0.9995	0.1505	0.8452
ENSG00000065029	ZNF76	zinc finger protein 76 [Source:HGNC Symbol;Acc:HGNC:13149]	protein_coding	-0.009341	0.9946	0.01221	0.9996	-0.001086	0.9988
ENSG00000065054	SLC9A3R2	SLC9A3 regulator 2 [Source:HGNC Symbol;Acc:HGNC:11076]	protein_coding	-0.09856	0.9638	-0.08113	0.9995	0.04498	0.9758
ENSG00000065057	NTHL1	nth like DNA glycosylase 1 [Source:HGNC Symbol;Acc:HGNC:8028]	protein_coding	0.4411	0.4849	0.4591	0.9255	0.483	0.5413
ENSG00000065060	UHRF1BP1	UHRF1 binding protein 1 [Source:HGNC Symbol;Acc:HGNC:21216]	protein_coding	0.1645	0.8142	0.1847	0.9995	0.1799	0.7218
ENSG00000065135	GNAI3	G protein subunit alpha i3 [Source:HGNC Symbol;Acc:HGNC:4387]	protein_coding	-0.03461	0.9843	-0.01268	0.9996	-0.009946	0.9932
ENSG00000065150	IPO5	importin 5 [Source:HGNC Symbol;Acc:HGNC:6402]	protein_coding	-0.1123	0.9132	-0.09104	0.9995	-0.1001	0.8782
ENSG00000065154	OAT	ornithine aminotransferase [Source:HGNC Symbol;Acc:HGNC:8091]	protein_coding	-0.4994	0.5377	-0.4802	0.7526	-0.481	0.6182
ENSG00000065183	WDR3	WD repeat domain 3 [Source:HGNC Symbol;Acc:HGNC:12755]	protein_coding	-0.2513	0.8458	-0.2309	0.9995	-0.2598	0.7487
ENSG00000065243	PKN2	protein kinase N2 [Source:HGNC Symbol;Acc:HGNC:9406]	protein_coding	-0.2991	0.8038	-0.2775	0.9995	-0.2551	0.7463
ENSG00000065268	WDR18	WD repeat domain 18 [Source:HGNC Symbol;Acc:HGNC:17956]	protein_coding	0.1747	0.9143	0.1902	0.9995	0.2225	0.8111
ENSG00000065308	TRAM2	translocation associated membrane protein 2 [Source:HGNC Symbol;Acc:HGNC:16855]	protein_coding	-0.3637	0.9023	-0.3416	0.9995	-0.3926	0.8354
ENSG00000065320	NTN1	netrin 1 [Source:HGNC Symbol;Acc:HGNC:8029]	protein_coding	0.2926	0.9173	0.3078	0.9995	0.4682	0.7748
ENSG00000065328	MCM10	minichromosome maintenance 10 replication initiation factor [Source:HGNC Symbol;Acc:HGNC:18043]	protein_coding	0.445	0.675	0.4613	0.9753	0.4738	0.6302
ENSG00000065357	DGKA	diacylglycerol kinase alpha [Source:HGNC Symbol;Acc:HGNC:2849]	protein_coding	0.02644	0.9852	0.04379	0.9995	0.0292	0.9751
ENSG00000065361	ERBB3	erb-b2 receptor tyrosine kinase 3 [Source:HGNC Symbol;Acc:HGNC:3431]	protein_coding	-0.05249	0.9811	-0.03585	0.9995	0.02747	0.983
ENSG00000065413	ANKRD44	ankyrin repeat domain 44 [Source:HGNC Symbol;Acc:HGNC:25259]	protein_coding	-0.1383	0.8957	-0.1153	0.9995	-0.1219	0.841
ENSG00000065427	KARS1	lysyl-tRNA synthetase 1 [Source:HGNC Symbol;Acc:HGNC:6215]	protein_coding	0.1192	0.9023	0.1396	0.9995	0.1796	0.7538
ENSG00000065457	ADAT1	adenosine deaminase tRNA specific 1 [Source:HGNC Symbol;Acc:HGNC:228]	protein_coding	-0.03781	0.9738	-0.0139	0.9995	-0.04609	0.9392
ENSG00000065485	PDIA5	protein disulfide isomerase family A member 5 [Source:HGNC Symbol;Acc:HGNC:24811]	protein_coding	-0.2045	0.9181	-0.1859	0.9995	-0.07514	0.9548
ENSG00000065491	TBC1D22B	TBC1 domain family member 22B [Source:HGNC Symbol;Acc:HGNC:21602]	protein_coding	0.3065	0.6897	0.3219	0.9995	0.3555	0.6031
ENSG00000065518	NDUFB4	NADH:ubiquinone oxidoreductase subunit B4 [Source:HGNC Symbol;Acc:HGNC:7699]	protein_coding	-0.01955	0.9904	0.001268	0.9996	0.009881	0.9932
ENSG00000065526	SPEN	spen family transcriptional repressor [Source:HGNC Symbol;Acc:HGNC:17575]	protein_coding	0.1382	0.9132	0.1553	0.9995	0.1271	0.8662
ENSG00000065534	MYLK	myosin light chain kinase [Source:HGNC Symbol;Acc:HGNC:7590]	protein_coding	-0.4374	0.722	-0.4201	0.9995	-0.4716	0.6786
ENSG00000065548	ZC3H15	zinc finger CCCH-type containing 15 [Source:HGNC Symbol;Acc:HGNC:29528]	protein_coding	-0.1034	0.949	-0.08213	0.9995	-0.06641	0.946
ENSG00000065559	MAP2K4	mitogen-activated protein kinase kinase 4 [Source:HGNC Symbol;Acc:HGNC:6844]	protein_coding	-0.2487	0.7886	-0.2262	0.9995	-0.2359	0.7251
ENSG00000065600	PACC1	proton activated chloride channel 1 [Source:HGNC Symbol;Acc:HGNC:25593]	protein_coding	0.1326	0.9133	0.1452	0.9995	0.185	0.7869
ENSG00000065613	SLK	STE20 like kinase [Source:HGNC Symbol;Acc:HGNC:11088]	protein_coding	-0.2257	0.8429	-0.2051	0.9995	-0.2257	0.7429
ENSG00000065615	CYB5R4	cytochrome b5 reductase 4 [Source:HGNC Symbol;Acc:HGNC:20147]	protein_coding	-0.02582	0.991	-0.001202	0.9996	0.03177	0.9805
ENSG00000065618	COL17A1	collagen type XVII alpha 1 chain [Source:HGNC Symbol;Acc:HGNC:2194]	protein_coding	0.5077	0.8644	0.5193	0.9995	0.4093	0.841
ENSG00000065621	GSTO2	glutathione S-transferase omega 2 [Source:HGNC Symbol;Acc:HGNC:23064]	protein_coding	-0.1116	0.9553	-0.09648	0.9995	0.04443	0.9758
ENSG00000065665	SEC61A2	SEC61 translocon alpha 2 subunit [Source:HGNC Symbol;Acc:HGNC:17702]	protein_coding	0.2664	0.8296	0.287	0.9995	0.2904	0.717
ENSG00000065675	PRKCQ	protein kinase C theta [Source:HGNC Symbol;Acc:HGNC:9410]	protein_coding	0.1594	0.8958	0.1818	0.9995	0.1645	0.8215
ENSG00000065717	TLE2	TLE family member 2, transcriptional corepressor [Source:HGNC Symbol;Acc:HGNC:11838]	protein_coding	-0.2745	0.8945	-0.2612	0.9995	-0.07903	0.9558
ENSG00000065802	ASB1	ankyrin repeat and SOCS box containing 1 [Source:HGNC Symbol;Acc:HGNC:16011]	protein_coding	0.0964	0.9466	0.1143	0.9995	0.135	0.8652
ENSG00000065809	FAM107B	family with sequence similarity 107 member B [Source:HGNC Symbol;Acc:HGNC:23726]	protein_coding	0.1125	0.934	0.1354	0.9995	0.1489	0.8339
ENSG00000065833	ME1	malic enzyme 1 [Source:HGNC Symbol;Acc:HGNC:6983]	protein_coding	-0.9133	0.2706	-0.8906	0.2802	-0.9629	0.5384
ENSG00000065882	TBC1D1	TBC1 domain family member 1 [Source:HGNC Symbol;Acc:HGNC:11578]	protein_coding	0.1601	0.8815	0.1766	0.9995	0.1297	0.8272
ENSG00000065883	CDK13	cyclin dependent kinase 13 [Source:HGNC Symbol;Acc:HGNC:1733]	protein_coding	-0.0838	0.9279	-0.06255	0.9995	-0.06768	0.9095
ENSG00000065911	MTHFD2	methylenetetrahydrofolate dehydrogenase (NADP+ dependent) 2, methenyltetrahydrofolate cyclohydrolase [Source:HGNC Symbol;Acc:HGNC:7434]	protein_coding	0.4256	0.5732	0.4448	0.7526	0.4863	0.5641
ENSG00000065923	SLC9A7	solute carrier family 9 member A7 [Source:HGNC Symbol;Acc:HGNC:17123]	protein_coding	-0.1337	0.9289	-0.1143	0.9995	-0.07226	0.9392
ENSG00000065970	FOXJ2	forkhead box J2 [Source:HGNC Symbol;Acc:HGNC:24818]	protein_coding	-0.0811	0.9427	-0.07028	0.9995	-0.02806	0.9693
ENSG00000065978	YBX1	Y-box binding protein 1 [Source:HGNC Symbol;Acc:HGNC:8014]	protein_coding	-0.1775	0.8561	-0.1578	0.9995	-0.07605	0.9097
ENSG00000065989	PDE4A	phosphodiesterase 4A [Source:HGNC Symbol;Acc:HGNC:8780]	protein_coding	0.2935	0.8261	0.3083	0.9995	0.3659	0.6889
ENSG00000066027	PPP2R5A	protein phosphatase 2 regulatory subunit B'alpha [Source:HGNC Symbol;Acc:HGNC:9309]	protein_coding	-0.1414	0.8994	-0.1188	0.9995	-0.1268	0.8478
ENSG00000066044	ELAVL1	ELAV like RNA binding protein 1 [Source:HGNC Symbol;Acc:HGNC:3312]	protein_coding	0.2576	0.7485	0.2735	0.9995	0.2648	0.6972
ENSG00000066056	TIE1	tyrosine kinase with immunoglobulin like and EGF like domains 1 [Source:HGNC Symbol;Acc:HGNC:11809]	protein_coding	0.1278	0.9609	0.1471	0.9995	0.2681	0.8393
ENSG00000066084	DIP2B	disco interacting protein 2 homolog B [Source:HGNC Symbol;Acc:HGNC:29284]	protein_coding	-0.2573	0.7446	-0.2375	0.9995	-0.2385	0.7127
ENSG00000066117	SMARCD1	SWI/SNF related, matrix associated, actin dependent regulator of chromatin, subfamily d, member 1 [Source:HGNC Symbol;Acc:HGNC:11106]	protein_coding	0.1988	0.8874	0.2146	0.9995	0.2137	0.7899
ENSG00000066136	NFYC	nuclear transcription factor Y subunit gamma [Source:HGNC Symbol;Acc:HGNC:7806]	protein_coding	0.2188	0.7118	0.2346	0.9995	0.2265	0.6851
ENSG00000066230	SLC9A3	solute carrier family 9 member A3 [Source:HGNC Symbol;Acc:HGNC:11073]	protein_coding	-0.6253	0.3632	-0.6061	0.6116	-0.7041	0.5217
ENSG00000066248	NGEF	neuronal guanine nucleotide exchange factor [Source:HGNC Symbol;Acc:HGNC:7807]	protein_coding	-1.501	0.4454	-1.476	0.6528	-1.873	0.5281
ENSG00000066279	ASPM	abnormal spindle microtubule assembly [Source:HGNC Symbol;Acc:HGNC:19048]	protein_coding	0.468	0.8012	0.4913	0.9753	0.5034	0.6972
ENSG00000066294	CD84	CD84 molecule [Source:HGNC Symbol;Acc:HGNC:1704]	protein_coding	-0.1922	0.8936	-0.1723	0.9995	-0.1493	0.8669
ENSG00000066322	ELOVL1	ELOVL fatty acid elongase 1 [Source:HGNC Symbol;Acc:HGNC:14418]	protein_coding	-0.0138	0.9908	0.003497	0.9996	-0.01024	0.9905
ENSG00000066336	SPI1	Spi-1 proto-oncogene [Source:HGNC Symbol;Acc:HGNC:11241]	protein_coding	0.3321	0.8874	0.3486	0.9995	0.3214	0.8341
ENSG00000066379	ZNRD1	zinc ribbon domain containing 1 [Source:HGNC Symbol;Acc:HGNC:13182]	protein_coding	0.03927	0.9805	0.05993	0.9995	0.04514	0.9606
ENSG00000066405	CLDN18	claudin 18 [Source:HGNC Symbol;Acc:HGNC:2039]	protein_coding	0.311	0.9143	0.3251	0.9995	0.3548	0.8219
ENSG00000066422	ZBTB11	zinc finger and BTB domain containing 11 [Source:HGNC Symbol;Acc:HGNC:16740]	protein_coding	-0.1288	0.923	-0.1069	0.9995	-0.1294	0.8642
ENSG00000066427	ATXN3	ataxin 3 [Source:HGNC Symbol;Acc:HGNC:7106]	protein_coding	-0.1283	0.9181	-0.1076	0.9995	-0.09627	0.8998
ENSG00000066455	GOLGA5	golgin A5 [Source:HGNC Symbol;Acc:HGNC:4428]	protein_coding	-0.2576	0.8084	-0.2364	0.9995	-0.2494	0.7393
ENSG00000066468	FGFR2	fibroblast growth factor receptor 2 [Source:HGNC Symbol;Acc:HGNC:3689]	protein_coding	-0.4617	0.6273	-0.4386	0.9642	-0.502	0.6236
ENSG00000066557	LRRC40	leucine rich repeat containing 40 [Source:HGNC Symbol;Acc:HGNC:26004]	protein_coding	-0.1867	0.9217	-0.1626	0.9995	-0.2547	0.8272
ENSG00000066583	ISOC1	isochorismatase domain containing 1 [Source:HGNC Symbol;Acc:HGNC:24254]	protein_coding	-0.1275	0.9352	-0.1066	0.9995	-0.06772	0.9392
ENSG00000066629	EML1	EMAP like 1 [Source:HGNC Symbol;Acc:HGNC:3330]	protein_coding	-0.6678	0.3139	-0.6515	0.554	-0.5585	0.5641
ENSG00000066651	TRMT11	tRNA methyltransferase 11 homolog [Source:HGNC Symbol;Acc:HGNC:21080]	protein_coding	-0.09212	0.9462	-0.06936	0.9995	-0.04311	0.9574
ENSG00000066697	MSANTD3	Myb/SANT DNA binding domain containing 3 [Source:HGNC Symbol;Acc:HGNC:23370]	protein_coding	0.06013	0.9819	0.07472	0.9995	0.2439	0.8585
ENSG00000066735	KIF26A	kinesin family member 26A [Source:HGNC Symbol;Acc:HGNC:20226]	protein_coding	-0.44	0.8641	-0.4244	0.9995	-0.0396	0.9834
ENSG00000066739	ATG2B	autophagy related 2B [Source:HGNC Symbol;Acc:HGNC:20187]	protein_coding	-0.2733	0.7476	-0.2524	0.9995	-0.2558	0.703
ENSG00000066777	ARFGEF1	ADP ribosylation factor guanine nucleotide exchange factor 1 [Source:HGNC Symbol;Acc:HGNC:15772]	protein_coding	-0.139	0.8874	-0.1203	0.9995	-0.1286	0.8272
ENSG00000066827	ZFAT	zinc finger and AT-hook domain containing [Source:HGNC Symbol;Acc:HGNC:19899]	protein_coding	0.03591	0.9872	0.05265	0.9995	0.1358	0.8837
ENSG00000066855	MTFR1	mitochondrial fission regulator 1 [Source:HGNC Symbol;Acc:HGNC:29510]	protein_coding	-0.1722	0.9199	-0.1482	0.9995	-0.2846	0.7788
ENSG00000066926	FECH	ferrochelatase [Source:HGNC Symbol;Acc:HGNC:3647]	protein_coding	-0.1457	0.8642	-0.1301	0.9995	-0.1139	0.8325
ENSG00000066933	MYO9A	myosin IXA [Source:HGNC Symbol;Acc:HGNC:7608]	protein_coding	-0.2502	0.675	-0.2307	0.9995	-0.2377	0.6827
ENSG00000067048	DDX3Y	DEAD-box helicase 3 Y-linked [Source:HGNC Symbol;Acc:HGNC:2699]	protein_coding	-0.1988	0.9882	-0.1647	0.9995	1.157	0.9105
ENSG00000067057	PFKP	phosphofructokinase, platelet [Source:HGNC Symbol;Acc:HGNC:8878]	protein_coding	0.2147	0.9118	0.2345	0.9995	0.1958	0.8551
ENSG00000067064	IDI1	isopentenyl-diphosphate delta isomerase 1 [Source:HGNC Symbol;Acc:HGNC:5387]	protein_coding	-0.2206	0.903	-0.1993	0.9995	-0.1534	0.8947
ENSG00000067066	SP100	SP100 nuclear antigen [Source:HGNC Symbol;Acc:HGNC:11206]	protein_coding	0.1948	0.8025	0.2149	0.9995	0.1938	0.7035
ENSG00000067082	KLF6	Kruppel like factor 6 [Source:HGNC Symbol;Acc:HGNC:2235]	protein_coding	0.07189	0.9724	0.09196	0.9995	0.05399	0.964
ENSG00000067113	PLPP1	phospholipid phosphatase 1 [Source:HGNC Symbol;Acc:HGNC:9228]	protein_coding	-0.4883	0.7515	-0.4702	0.9995	-0.3686	0.7468
ENSG00000067141	NEO1	neogenin 1 [Source:HGNC Symbol;Acc:HGNC:7754]	protein_coding	-0.3313	0.889	-0.3125	0.9995	-0.1167	0.9392
ENSG00000067167	TRAM1	translocation associated membrane protein 1 [Source:HGNC Symbol;Acc:HGNC:20568]	protein_coding	-0.3201	0.8648	-0.2958	0.9995	-0.2243	0.8481
ENSG00000067177	PHKA1	phosphorylase kinase regulatory subunit alpha 1 [Source:HGNC Symbol;Acc:HGNC:8925]	protein_coding	-0.004118	0.9992	0.0141	0.9996	0.1414	0.9146
ENSG00000067182	TNFRSF1A	TNF receptor superfamily member 1A [Source:HGNC Symbol;Acc:HGNC:11916]	protein_coding	0.069	0.9697	0.08382	0.9995	0.02976	0.979
ENSG00000067191	CACNB1	calcium voltage-gated channel auxiliary subunit beta 1 [Source:HGNC Symbol;Acc:HGNC:1401]	protein_coding	0.1755	0.9081	0.1932	0.9995	0.2244	0.7979
ENSG00000067208	EVI5	ecotropic viral integration site 5 [Source:HGNC Symbol;Acc:HGNC:3501]	protein_coding	-0.3289	0.6601	-0.3149	0.9995	-0.2654	0.6997
ENSG00000067221	STOML1	stomatin like 1 [Source:HGNC Symbol;Acc:HGNC:14560]	protein_coding	0.1491	0.9289	0.1668	0.9995	0.1333	0.8953
ENSG00000067225	PKM	pyruvate kinase M1/2 [Source:HGNC Symbol;Acc:HGNC:9021]	protein_coding	0.4567	0.7665	0.4727	0.9995	0.5187	0.7195
ENSG00000067248	DHX29	DExH-box helicase 29 [Source:HGNC Symbol;Acc:HGNC:15815]	protein_coding	-0.2667	0.8151	-0.2449	0.9995	-0.2663	0.7278
ENSG00000067334	DNTTIP2	deoxynucleotidyltransferase terminal interacting protein 2 [Source:HGNC Symbol;Acc:HGNC:24013]	protein_coding	-0.1121	0.9537	-0.09015	0.9995	-0.06244	0.9581
ENSG00000067365	METTL22	methyltransferase like 22 [Source:HGNC Symbol;Acc:HGNC:28368]	protein_coding	0.1041	0.9217	0.1189	0.9995	0.1409	0.8272
ENSG00000067369	TP53BP1	tumor protein p53 binding protein 1 [Source:HGNC Symbol;Acc:HGNC:11999]	protein_coding	0.1055	0.9566	0.1218	0.9995	0.1935	0.836
ENSG00000067445	TRO	trophinin [Source:HGNC Symbol;Acc:HGNC:12326]	protein_coding	-0.4792	0.7887	-0.462	0.9995	-0.3808	0.7522
ENSG00000067533	RRP15	ribosomal RNA processing 15 homolog [Source:HGNC Symbol;Acc:HGNC:24255]	protein_coding	-0.2066	0.8874	-0.1816	0.9995	-0.2586	0.7411
ENSG00000067560	RHOA	ras homolog family member A [Source:HGNC Symbol;Acc:HGNC:667]	protein_coding	0.08517	0.8994	0.1032	0.9995	0.1249	0.826
ENSG00000067596		DEAH-box helicase 8 [Source:NCBI gene;Acc:1659]	protein_coding	0.1521	0.8874	0.1678	0.9995	0.1454	0.8249
ENSG00000067606	PRKCZ	protein kinase C zeta [Source:HGNC Symbol;Acc:HGNC:9412]	protein_coding	0.0851	0.97	0.09856	0.9995	0.1986	0.8437
ENSG00000067646	ZFY	zinc finger protein Y-linked [Source:HGNC Symbol;Acc:HGNC:12870]	protein_coding	-0.08159	0.9949	-0.04603	0.9996	1.192	0.8837
ENSG00000067704	IARS2	isoleucyl-tRNA synthetase 2, mitochondrial [Source:HGNC Symbol;Acc:HGNC:29685]	protein_coding	-0.1315	0.8909	-0.1123	0.9995	-0.1282	0.8301
ENSG00000067798	NAV3	neuron navigator 3 [Source:HGNC Symbol;Acc:HGNC:15998]	protein_coding	-0.4316	0.8199	-0.4091	0.9995	-0.4232	0.7626
ENSG00000067829	IDH3G	isocitrate dehydrogenase (NAD(+)) 3 non-catalytic subunit gamma [Source:HGNC Symbol;Acc:HGNC:5386]	protein_coding	0.1053	0.9172	0.1217	0.9995	0.1235	0.8392
ENSG00000067836	ROGDI	rogdi atypical leucine zipper [Source:HGNC Symbol;Acc:HGNC:29478]	protein_coding	0.02555	0.9904	0.04219	0.9995	-0.009735	0.9941
ENSG00000067840	PDZD4	PDZ domain containing 4 [Source:HGNC Symbol;Acc:HGNC:21167]	protein_coding	-0.3132	0.8966	-0.2966	0.9995	-0.1081	0.946
ENSG00000067900	ROCK1	Rho associated coiled-coil containing protein kinase 1 [Source:HGNC Symbol;Acc:HGNC:10251]	protein_coding	-0.1453	0.8874	-0.1246	0.9995	-0.1328	0.8292
ENSG00000067955	CBFB	core-binding factor subunit beta [Source:HGNC Symbol;Acc:HGNC:1539]	protein_coding	0.06092	0.9495	0.08501	0.9995	0.06461	0.9073
ENSG00000067992	PDK3	pyruvate dehydrogenase kinase 3 [Source:HGNC Symbol;Acc:HGNC:8811]	protein_coding	-0.1259	0.9331	-0.1043	0.9995	-0.09886	0.9135
ENSG00000068001	HYAL2	hyaluronidase 2 [Source:HGNC Symbol;Acc:HGNC:5321]	protein_coding	0.05114	0.9805	0.06718	0.9995	0.1033	0.9244
ENSG00000068024	HDAC4	histone deacetylase 4 [Source:HGNC Symbol;Acc:HGNC:14063]	protein_coding	0.07999	0.9598	0.09787	0.9995	0.1211	0.8705
ENSG00000068028	RASSF1	Ras association domain family member 1 [Source:HGNC Symbol;Acc:HGNC:9882]	protein_coding	0.02607	0.9838	0.04615	0.9995	0.05515	0.9378
ENSG00000068078	FGFR3	fibroblast growth factor receptor 3 [Source:HGNC Symbol;Acc:HGNC:3690]	protein_coding	0.08277	0.98	0.09638	0.9995	-0.03923	0.9831
ENSG00000068079	IFI35	interferon induced protein 35 [Source:HGNC Symbol;Acc:HGNC:5399]	protein_coding	0.4194	0.7467	0.4368	0.9792	0.4556	0.6858
ENSG00000068097	HEATR6	HEAT repeat containing 6 [Source:HGNC Symbol;Acc:HGNC:24076]	protein_coding	0.1432	0.9199	0.1595	0.9995	0.2189	0.78
ENSG00000068120	COASY	Coenzyme A synthase [Source:HGNC Symbol;Acc:HGNC:29932]	protein_coding	0.1928	0.8329	0.2107	0.9995	0.2133	0.7411
ENSG00000068137	PLEKHH3	pleckstrin homology, MyTH4 and FERM domain containing H3 [Source:HGNC Symbol;Acc:HGNC:26105]	protein_coding	0.01002	0.9953	0.02259	0.9995	0.1015	0.8989
ENSG00000068305	MEF2A	myocyte enhancer factor 2A [Source:HGNC Symbol;Acc:HGNC:6993]	protein_coding	-0.2066	0.8497	-0.1863	0.9995	-0.1909	0.7748
ENSG00000068308	OTUD5	OTU deubiquitinase 5 [Source:HGNC Symbol;Acc:HGNC:25402]	protein_coding	0.1342	0.8874	0.1504	0.9995	0.1361	0.8262
ENSG00000068323	TFE3	transcription factor binding to IGHM enhancer 3 [Source:HGNC Symbol;Acc:HGNC:11752]	protein_coding	0.3769	0.6888	0.3925	0.9661	0.3861	0.6786
ENSG00000068354	TBC1D25	TBC1 domain family member 25 [Source:HGNC Symbol;Acc:HGNC:8092]	protein_coding	0.1128	0.9183	0.1255	0.9995	0.1711	0.7899
ENSG00000068366	ACSL4	acyl-CoA synthetase long chain family member 4 [Source:HGNC Symbol;Acc:HGNC:3571]	protein_coding	0.1244	0.918	0.1455	0.9995	0.1492	0.8301
ENSG00000068383	INPP5A	inositol polyphosphate-5-phosphatase A [Source:HGNC Symbol;Acc:HGNC:6076]	protein_coding	-0.05016	0.9765	-0.03874	0.9995	0.02368	0.979
ENSG00000068394	GPKOW	G-patch domain and KOW motifs [Source:HGNC Symbol;Acc:HGNC:30677]	protein_coding	0.2366	0.7501	0.2561	0.9995	0.2353	0.703
ENSG00000068400	GRIPAP1	GRIP1 associated protein 1 [Source:HGNC Symbol;Acc:HGNC:18706]	protein_coding	0.2455	0.7566	0.262	0.9995	0.2524	0.6997
ENSG00000068438	FTSJ1	FtsJ RNA 2'-O-methyltransferase 1 [Source:HGNC Symbol;Acc:HGNC:13254]	protein_coding	0.1573	0.8715	0.1744	0.9995	0.1735	0.76
ENSG00000068489	PRR11	proline rich 11 [Source:HGNC Symbol;Acc:HGNC:25619]	protein_coding	-0.05836	0.9853	-0.03647	0.9995	0.1559	0.9276
ENSG00000068615	REEP1	receptor accessory protein 1 [Source:HGNC Symbol;Acc:HGNC:25786]	protein_coding	-0.5723	0.8874	-0.5478	0.9995	-0.592	0.7778
ENSG00000068650	ATP11A	ATPase phospholipid transporting 11A [Source:HGNC Symbol;Acc:HGNC:13552]	protein_coding	0.132	0.9208	0.1492	0.9995	0.1717	0.8237
ENSG00000068654	POLR1A	RNA polymerase I subunit A [Source:HGNC Symbol;Acc:HGNC:17264]	protein_coding	0.2243	0.8532	0.2408	0.9995	0.2632	0.7234
ENSG00000068697	LAPTM4A	lysosomal protein transmembrane 4 alpha [Source:HGNC Symbol;Acc:HGNC:6924]	protein_coding	-0.2524	0.7952	-0.232	0.9995	-0.2263	0.7411
ENSG00000068724	TTC7A	tetratricopeptide repeat domain 7A [Source:HGNC Symbol;Acc:HGNC:19750]	protein_coding	0.06554	0.9661	0.07977	0.9995	0.1487	0.841
ENSG00000068745	IP6K2	inositol hexakisphosphate kinase 2 [Source:HGNC Symbol;Acc:HGNC:17313]	protein_coding	0.003067	0.9987	0.02288	0.9995	0.02085	0.975
ENSG00000068781	STON1-GTF2A1L	STON1-GTF2A1L readthrough [Source:HGNC Symbol;Acc:HGNC:30651]	protein_coding	-0.3889	0.9244	-0.3664	0.9995	0.03894	0.9904
ENSG00000068784	SRBD1	S1 RNA binding domain 1 [Source:HGNC Symbol;Acc:HGNC:25521]	protein_coding	0.03324	0.9853	0.05665	0.9995	0.01368	0.9896
ENSG00000068796	KIF2A	kinesin family member 2A [Source:HGNC Symbol;Acc:HGNC:6318]	protein_coding	0.1443	0.9517	0.151	0.9995	0.1955	0.8705
ENSG00000068831	RASGRP2	RAS guanyl releasing protein 2 [Source:HGNC Symbol;Acc:HGNC:9879]	protein_coding	-0.08474	0.97	-0.06928	0.9995	-0.07159	0.9581
ENSG00000068878	PSME4	proteasome activator subunit 4 [Source:HGNC Symbol;Acc:HGNC:20635]	protein_coding	-0.1094	0.9244	-0.0884	0.9995	-0.1028	0.8782
ENSG00000068903	SIRT2	sirtuin 2 [Source:HGNC Symbol;Acc:HGNC:10886]	protein_coding	0.2414	0.7952	0.2586	0.9995	0.2696	0.7061
ENSG00000068971	PPP2R5B	protein phosphatase 2 regulatory subunit B'beta [Source:HGNC Symbol;Acc:HGNC:9310]	protein_coding	0.3333	0.7118	0.3474	0.9995	0.4018	0.5973
ENSG00000068976	PYGM	glycogen phosphorylase, muscle associated [Source:HGNC Symbol;Acc:HGNC:9726]	protein_coding	-0.4002	0.8874	-0.3911	0.9995	-0.1841	0.9082
ENSG00000069011	PITX1	paired like homeodomain 1 [Source:HGNC Symbol;Acc:HGNC:9004]	protein_coding	0.2381	0.9331	0.2532	0.9995	0.5857	0.7931
ENSG00000069020	MAST4	microtubule associated serine/threonine kinase family member 4 [Source:HGNC Symbol;Acc:HGNC:19037]	protein_coding	0.0009177	0.9992	0.01743	0.9995	-0.002783	0.9976
ENSG00000069122	ADGRF5	adhesion G protein-coupled receptor F5 [Source:HGNC Symbol;Acc:HGNC:19030]	protein_coding	-0.002992	0.9992	0.01899	0.9996	-0.002998	0.998
ENSG00000069188	SDK2	sidekick cell adhesion molecule 2 [Source:HGNC Symbol;Acc:HGNC:19308]	protein_coding	-0.1184	0.9765	-0.1038	0.9995	0.03775	0.9887
ENSG00000069248	NUP133	nucleoporin 133 [Source:HGNC Symbol;Acc:HGNC:18016]	protein_coding	-4.486e-05	0.9999	0.02166	0.9995	0.01685	0.9807
ENSG00000069275	NUCKS1	nuclear casein kinase and cyclin dependent kinase substrate 1 [Source:HGNC Symbol;Acc:HGNC:29923]	protein_coding	-0.07065	0.9385	-0.05036	0.9995	-0.05455	0.9342
ENSG00000069329	VPS35	VPS35 retromer complex component [Source:HGNC Symbol;Acc:HGNC:13487]	protein_coding	-0.0759	0.9606	-0.05535	0.9995	-0.03312	0.9734
ENSG00000069345	DNAJA2	DnaJ heat shock protein family (Hsp40) member A2 [Source:HGNC Symbol;Acc:HGNC:14884]	protein_coding	-0.006674	0.9962	0.01507	0.9995	0.01483	0.9834
ENSG00000069399	BCL3	BCL3 transcription coactivator [Source:HGNC Symbol;Acc:HGNC:998]	protein_coding	0.5937	0.5128	0.611	0.6607	0.5973	0.5755
ENSG00000069424	KCNAB2	potassium voltage-gated channel subfamily A regulatory beta subunit 2 [Source:HGNC Symbol;Acc:HGNC:6229]	protein_coding	0.3966	0.6888	0.4146	0.9451	0.4027	0.6786
ENSG00000069431	ABCC9	ATP binding cassette subfamily C member 9 [Source:HGNC Symbol;Acc:HGNC:60]	protein_coding	-0.7606	0.4849	-0.7407	0.6607	-0.6115	0.6501
ENSG00000069482	GAL	galanin and GMAP prepropeptide [Source:HGNC Symbol;Acc:HGNC:4114]	protein_coding	-1.96	0.7649	-1.891	0.9753	-0.9566	0.8087
ENSG00000069493	CLEC2D	C-type lectin domain family 2 member D [Source:HGNC Symbol;Acc:HGNC:14351]	protein_coding	0.001299	0.9992	0.0238	0.9995	0.04522	0.9691
ENSG00000069509	FUNDC1	FUN14 domain containing 1 [Source:HGNC Symbol;Acc:HGNC:28746]	protein_coding	-0.1674	0.9173	-0.1453	0.9995	-0.1873	0.8397
ENSG00000069535	MAOB	monoamine oxidase B [Source:HGNC Symbol;Acc:HGNC:6834]	protein_coding	-0.1343	0.9606	-0.1124	0.9995	-0.09785	0.9529
ENSG00000069667	RORA	RAR related orphan receptor A [Source:HGNC Symbol;Acc:HGNC:10258]	protein_coding	-0.7717	0.3503	-0.7471	0.3897	-0.7249	0.5641
ENSG00000069702	TGFBR3	transforming growth factor beta receptor 3 [Source:HGNC Symbol;Acc:HGNC:11774]	protein_coding	-0.767	0.6289	-0.7451	0.8147	-0.6154	0.6972
ENSG00000069812	HES2	hes family bHLH transcription factor 2 [Source:HGNC Symbol;Acc:HGNC:16005]	protein_coding	0.1759	0.9217	0.1895	0.9995	0.3021	0.7788
ENSG00000069849	ATP1B3	ATPase Na+/K+ transporting subunit beta 3 [Source:HGNC Symbol;Acc:HGNC:806]	protein_coding	-0.1578	0.8725	-0.1371	0.9995	-0.1425	0.826
ENSG00000069869	NEDD4	NEDD4 E3 ubiquitin protein ligase [Source:HGNC Symbol;Acc:HGNC:7727]	protein_coding	0.05329	0.9787	0.07051	0.9995	0.0273	0.9791
ENSG00000069943	PIGB	phosphatidylinositol glycan anchor biosynthesis class B [Source:HGNC Symbol;Acc:HGNC:8959]	protein_coding	-0.2921	0.8329	-0.2665	0.9995	-0.2342	0.794
ENSG00000069956	MAPK6	mitogen-activated protein kinase 6 [Source:HGNC Symbol;Acc:HGNC:6879]	protein_coding	-0.1751	0.924	-0.1524	0.9995	-0.1532	0.8858
ENSG00000069966	GNB5	G protein subunit beta 5 [Source:HGNC Symbol;Acc:HGNC:4401]	protein_coding	-0.04522	0.9747	-0.02728	0.9995	-0.04207	0.9564
ENSG00000069974	RAB27A	RAB27A, member RAS oncogene family [Source:HGNC Symbol;Acc:HGNC:9766]	protein_coding	0.1483	0.9208	0.1698	0.9995	0.1789	0.8339
ENSG00000069998	HDHD5	haloacid dehalogenase like hydrolase domain containing 5 [Source:HGNC Symbol;Acc:HGNC:1843]	protein_coding	0.1689	0.905	0.1871	0.9995	0.2117	0.7964
ENSG00000070010	UFD1	ubiquitin recognition factor in ER associated degradation 1 [Source:HGNC Symbol;Acc:HGNC:12520]	protein_coding	0.1098	0.9023	0.1303	0.9995	0.1116	0.8403
ENSG00000070019	GUCY2C	guanylate cyclase 2C [Source:HGNC Symbol;Acc:HGNC:4688]	protein_coding	-0.2577	0.9105	-0.2334	0.9995	-0.1452	0.9244
ENSG00000070047	PHRF1	PHD and ring finger domains 1 [Source:HGNC Symbol;Acc:HGNC:24351]	protein_coding	0.1865	0.8874	0.2025	0.9995	0.1936	0.7887
ENSG00000070061	ELP1	elongator complex protein 1 [Source:HGNC Symbol;Acc:HGNC:5959]	protein_coding	-0.002859	0.9992	0.01913	0.9995	-0.00913	0.9918
ENSG00000070081	NUCB2	nucleobindin 2 [Source:HGNC Symbol;Acc:HGNC:8044]	protein_coding	-0.3436	0.8812	-0.3225	0.9995	-0.2335	0.8757
ENSG00000070087	PFN2	profilin 2 [Source:HGNC Symbol;Acc:HGNC:8882]	protein_coding	0.03134	0.9873	0.04793	0.9995	0.02948	0.9791
ENSG00000070159	PTPN3	protein tyrosine phosphatase non-receptor type 3 [Source:HGNC Symbol;Acc:HGNC:9655]	protein_coding	0.03365	0.9843	0.05308	0.9995	0.08043	0.936
ENSG00000070182	SPTB	spectrin beta, erythrocytic [Source:HGNC Symbol;Acc:HGNC:11274]	protein_coding	0.6192	0.8151	0.6199	0.9995	0.8711	0.6154
ENSG00000070190	DAPP1	dual adaptor of phosphotyrosine and 3-phosphoinositides 1 [Source:HGNC Symbol;Acc:HGNC:16500]	protein_coding	-0.1006	0.9457	-0.07991	0.9995	-0.05302	0.9529
ENSG00000070193	FGF10	fibroblast growth factor 10 [Source:HGNC Symbol;Acc:HGNC:3666]	protein_coding	-1.727	0.659	-1.675	0.7797	-1.801	0.5641
ENSG00000070214	SLC44A1	solute carrier family 44 member 1 [Source:HGNC Symbol;Acc:HGNC:18798]	protein_coding	-0.3743	0.7063	-0.3534	0.9949	-0.35	0.6997
ENSG00000070269	TMEM260	transmembrane protein 260 [Source:HGNC Symbol;Acc:HGNC:20185]	protein_coding	-0.1686	0.8666	-0.1477	0.9995	-0.1528	0.8059
ENSG00000070366	SMG6	SMG6 nonsense mediated mRNA decay factor [Source:HGNC Symbol;Acc:HGNC:17809]	protein_coding	-0.1113	0.9495	-0.09455	0.9995	-0.0009316	0.9993
ENSG00000070367	EXOC5	exocyst complex component 5 [Source:HGNC Symbol;Acc:HGNC:10696]	protein_coding	-0.09953	0.9426	-0.07684	0.9995	-0.09858	0.8989
ENSG00000070371	CLTCL1	clathrin heavy chain like 1 [Source:HGNC Symbol;Acc:HGNC:2093]	protein_coding	0.04279	0.9869	0.05135	0.9995	0.1833	0.8726
ENSG00000070388	FGF22	fibroblast growth factor 22 [Source:HGNC Symbol;Acc:HGNC:3679]	protein_coding	-0.4668	0.9181	-0.4607	0.9995	-0.9543	0.7748
ENSG00000070404	FSTL3	follistatin like 3 [Source:HGNC Symbol;Acc:HGNC:3973]	protein_coding	0.704	0.7655	0.7151	0.9995	0.7877	0.6997
ENSG00000070413	DGCR2	DiGeorge syndrome critical region gene 2 [Source:HGNC Symbol;Acc:HGNC:2845]	protein_coding	-0.04229	0.9775	-0.02694	0.9995	-0.03043	0.9736
ENSG00000070423	RNF126	ring finger protein 126 [Source:HGNC Symbol;Acc:HGNC:21151]	protein_coding	0.1603	0.8874	0.1768	0.9995	0.1557	0.8215
ENSG00000070444	MNT	MAX network transcriptional repressor [Source:HGNC Symbol;Acc:HGNC:7188]	protein_coding	-0.01188	0.9947	0.003143	0.9996	0.07105	0.9329
ENSG00000070476	ZXDC	ZXD family zinc finger C [Source:HGNC Symbol;Acc:HGNC:28160]	protein_coding	0.05426	0.9569	0.07371	0.9995	0.07989	0.8825
ENSG00000070495	JMJD6	jumonji domain containing 6, arginine demethylase and lysine hydroxylase [Source:HGNC Symbol;Acc:HGNC:19355]	protein_coding	0.4141	0.6289	0.4319	0.8679	0.4761	0.5641
ENSG00000070501	POLB	DNA polymerase beta [Source:HGNC Symbol;Acc:HGNC:9174]	protein_coding	-0.1456	0.9331	-0.1256	0.9995	-0.1889	0.8433
ENSG00000070526	ST6GALNAC1	ST6 N-acetylgalactosaminide alpha-2,6-sialyltransferase 1 [Source:HGNC Symbol;Acc:HGNC:23614]	protein_coding	-0.498	0.8909	-0.4764	0.9995	-0.4476	0.8677
ENSG00000070540	WIPI1	WD repeat domain, phosphoinositide interacting 1 [Source:HGNC Symbol;Acc:HGNC:25471]	protein_coding	-0.1588	0.8874	-0.1407	0.9995	-0.1454	0.8305
ENSG00000070610	GBA2	glucosylceramidase beta 2 [Source:HGNC Symbol;Acc:HGNC:18986]	protein_coding	0.1234	0.8939	0.1405	0.9995	0.1438	0.8111
ENSG00000070614	NDST1	N-deacetylase and N-sulfotransferase 1 [Source:HGNC Symbol;Acc:HGNC:7680]	protein_coding	0.008837	0.9968	0.02486	0.9995	-0.05253	0.9631
ENSG00000070669	ASNS	asparagine synthetase (glutamine-hydrolyzing) [Source:HGNC Symbol;Acc:HGNC:753]	protein_coding	0.377	0.8114	0.3944	0.9995	0.3505	0.7487
ENSG00000070718	AP3M2	adaptor related protein complex 3 subunit mu 2 [Source:HGNC Symbol;Acc:HGNC:570]	protein_coding	0.02598	0.9833	0.04486	0.9995	0.03935	0.9548
ENSG00000070729	CNGB1	cyclic nucleotide gated channel subunit beta 1 [Source:HGNC Symbol;Acc:HGNC:2151]	protein_coding	0.1064	0.9787	0.1261	0.9995	0.4898	0.8482
ENSG00000070731	ST6GALNAC2	ST6 N-acetylgalactosaminide alpha-2,6-sialyltransferase 2 [Source:HGNC Symbol;Acc:HGNC:10867]	protein_coding	0.6028	0.6579	0.615	0.9213	0.7983	0.5736
ENSG00000070756	PABPC1	poly(A) binding protein cytoplasmic 1 [Source:HGNC Symbol;Acc:HGNC:8554]	protein_coding	-0.2561	0.5575	-0.2385	0.9995	-0.1936	0.7788
ENSG00000070761	CFAP20	cilia and flagella associated protein 20 [Source:HGNC Symbol;Acc:HGNC:29523]	protein_coding	0.1148	0.9083	0.1374	0.9995	0.124	0.8339
ENSG00000070770	CSNK2A2	casein kinase 2 alpha 2 [Source:HGNC Symbol;Acc:HGNC:2459]	protein_coding	-0.1718	0.8639	-0.1514	0.9995	-0.1485	0.82
ENSG00000070778	PTPN21	protein tyrosine phosphatase non-receptor type 21 [Source:HGNC Symbol;Acc:HGNC:9651]	protein_coding	-0.1239	0.9612	-0.1147	0.9995	0.182	0.8955
ENSG00000070785	EIF2B3	eukaryotic translation initiation factor 2B subunit gamma [Source:HGNC Symbol;Acc:HGNC:3259]	protein_coding	-0.08383	0.9612	-0.0627	0.9995	-0.09766	0.9135
ENSG00000070814	TCOF1	treacle ribosome biogenesis factor 1 [Source:HGNC Symbol;Acc:HGNC:11654]	protein_coding	0.201	0.8936	0.2175	0.9995	0.2183	0.7964
ENSG00000070831	CDC42	cell division cycle 42 [Source:HGNC Symbol;Acc:HGNC:1736]	protein_coding	-0.1472	0.8965	-0.125	0.9995	-0.04988	0.946
ENSG00000070882	OSBPL3	oxysterol binding protein like 3 [Source:HGNC Symbol;Acc:HGNC:16370]	protein_coding	-0.171	0.9036	-0.1504	0.9995	-0.1422	0.8589
ENSG00000070915	SLC12A3	solute carrier family 12 member 3 [Source:HGNC Symbol;Acc:HGNC:10912]	protein_coding	0.253	0.931	0.2715	0.9995	0.5052	0.7489
ENSG00000070950	RAD18	RAD18 E3 ubiquitin protein ligase [Source:HGNC Symbol;Acc:HGNC:18278]	protein_coding	-0.1035	0.9312	-0.08362	0.9995	-0.09429	0.8875
ENSG00000070961	ATP2B1	ATPase plasma membrane Ca2+ transporting 1 [Source:HGNC Symbol;Acc:HGNC:814]	protein_coding	-0.1765	0.9089	-0.1571	0.9995	-0.1574	0.8619
ENSG00000071051	NCK2	NCK adaptor protein 2 [Source:HGNC Symbol;Acc:HGNC:7665]	protein_coding	-0.01397	0.9929	0.002148	0.9996	-0.0006433	0.9993
ENSG00000071054	MAP4K4	mitogen-activated protein kinase kinase kinase kinase 4 [Source:HGNC Symbol;Acc:HGNC:6866]	protein_coding	-0.05156	0.977	-0.03446	0.9995	-0.14	0.8661
ENSG00000071073	MGAT4A	alpha-1,3-mannosyl-glycoprotein 4-beta-N-acetylglucosaminyltransferase A [Source:HGNC Symbol;Acc:HGNC:7047]	protein_coding	-0.2757	0.8619	-0.2525	0.9995	-0.2673	0.7778
ENSG00000071082	RPL31	ribosomal protein L31 [Source:HGNC Symbol;Acc:HGNC:10334]	protein_coding	-0.3752	0.8151	-0.3533	0.9995	-0.1046	0.9201
ENSG00000071127	WDR1	WD repeat domain 1 [Source:HGNC Symbol;Acc:HGNC:12754]	protein_coding	0.2363	0.8312	0.2533	0.9995	0.2263	0.7802
ENSG00000071189	SNX13	sorting nexin 13 [Source:HGNC Symbol;Acc:HGNC:21335]	protein_coding	-0.2903	0.8497	-0.267	0.9995	-0.2507	0.7845
ENSG00000071205	ARHGAP10	Rho GTPase activating protein 10 [Source:HGNC Symbol;Acc:HGNC:26099]	protein_coding	-0.1297	0.9381	-0.1161	0.9995	0.02833	0.9792
ENSG00000071242	RPS6KA2	ribosomal protein S6 kinase A2 [Source:HGNC Symbol;Acc:HGNC:10431]	protein_coding	0.07896	0.9612	0.09547	0.9995	0.1113	0.8956
ENSG00000071243	ING3	inhibitor of growth family member 3 [Source:HGNC Symbol;Acc:HGNC:14587]	protein_coding	-0.3204	0.7992	-0.2977	0.9995	-0.2845	0.7411
ENSG00000071246	VASH1	vasohibin 1 [Source:HGNC Symbol;Acc:HGNC:19964]	protein_coding	0.2681	0.896	0.2862	0.9995	0.2445	0.841
ENSG00000071282	LMCD1	LIM and cysteine rich domains 1 [Source:HGNC Symbol;Acc:HGNC:6633]	protein_coding	-1.17	0.2993	-1.149	0.4367	-0.9098	0.6182
ENSG00000071462	BUD23	BUD23 rRNA methyltransferase and ribosome maturation factor [Source:HGNC Symbol;Acc:HGNC:16405]	protein_coding	0.1178	0.8966	0.1352	0.9995	0.1185	0.8339
ENSG00000071537	SEL1L	SEL1L adaptor subunit of ERAD E3 ubiquitin ligase [Source:HGNC Symbol;Acc:HGNC:10717]	protein_coding	-0.4261	0.8532	-0.4067	0.9995	-0.2714	0.8771
ENSG00000071539	TRIP13	thyroid hormone receptor interactor 13 [Source:HGNC Symbol;Acc:HGNC:12307]	protein_coding	0.512	0.7294	0.527	0.9642	0.4177	0.7218
ENSG00000071553	ATP6AP1	ATPase H+ transporting accessory protein 1 [Source:HGNC Symbol;Acc:HGNC:868]	protein_coding	0.1199	0.9393	0.1372	0.9995	0.05585	0.9574
ENSG00000071564	TCF3	transcription factor 3 [Source:HGNC Symbol;Acc:HGNC:11633]	protein_coding	0.2014	0.8874	0.2179	0.9995	0.1935	0.8249
ENSG00000071575	TRIB2	tribbles pseudokinase 2 [Source:HGNC Symbol;Acc:HGNC:30809]	protein_coding	-0.1076	0.9446	-0.08955	0.9995	-0.08886	0.9158
ENSG00000071626	DAZAP1	DAZ associated protein 1 [Source:HGNC Symbol;Acc:HGNC:2683]	protein_coding	0.2599	0.6273	0.2763	0.9995	0.2284	0.6786
ENSG00000071655	MBD3	methyl-CpG binding domain protein 3 [Source:HGNC Symbol;Acc:HGNC:6918]	protein_coding	0.3004	0.8012	0.3158	0.9995	0.3385	0.703
ENSG00000071794	HLTF	helicase like transcription factor [Source:HGNC Symbol;Acc:HGNC:11099]	protein_coding	-0.09031	0.9606	-0.07017	0.9995	-0.06901	0.9393
ENSG00000071859	FAM50A	family with sequence similarity 50 member A [Source:HGNC Symbol;Acc:HGNC:18786]	protein_coding	0.3652	0.6289	0.3818	0.9213	0.3902	0.604
ENSG00000071889	FAM3A	family with sequence similarity 3 member A [Source:HGNC Symbol;Acc:HGNC:13749]	protein_coding	0.04657	0.977	0.06301	0.9995	0.07084	0.9329
ENSG00000071894	CPSF1	cleavage and polyadenylation specific factor 1 [Source:HGNC Symbol;Acc:HGNC:2324]	protein_coding	0.2431	0.8497	0.2618	0.9995	0.2431	0.7648
ENSG00000071967	CYBRD1	cytochrome b reductase 1 [Source:HGNC Symbol;Acc:HGNC:20797]	protein_coding	-0.8052	0.4682	-0.7842	0.596	-0.6856	0.6783
ENSG00000071991	CDH19	cadherin 19 [Source:HGNC Symbol;Acc:HGNC:1758]	protein_coding	0.7758	0.8142	0.7904	0.9995	1.15	0.5641
ENSG00000071994	PDCD2	programmed cell death 2 [Source:HGNC Symbol;Acc:HGNC:8762]	protein_coding	-0.09783	0.9217	-0.07306	0.9995	-0.09182	0.8783
ENSG00000072041	SLC6A15	solute carrier family 6 member 15 [Source:HGNC Symbol;Acc:HGNC:13621]	protein_coding	-0.1068	0.9843	-0.07928	0.9995	0.1468	0.967
ENSG00000072042	RDH11	retinol dehydrogenase 11 [Source:HGNC Symbol;Acc:HGNC:17964]	protein_coding	-0.136	0.9202	-0.1136	0.9995	-0.1246	0.8731
ENSG00000072062	PRKACA	protein kinase cAMP-activated catalytic subunit alpha [Source:HGNC Symbol;Acc:HGNC:9380]	protein_coding	0.1208	0.9378	0.1367	0.9995	0.1435	0.8708
ENSG00000072071	ADGRL1	adhesion G protein-coupled receptor L1 [Source:HGNC Symbol;Acc:HGNC:20973]	protein_coding	0.2046	0.8948	0.2215	0.9995	0.2449	0.7746
ENSG00000072110	ACTN1	actinin alpha 1 [Source:HGNC Symbol;Acc:HGNC:163]	protein_coding	0.2309	0.924	0.2463	0.9995	0.1493	0.9313
ENSG00000072121	ZFYVE26	zinc finger FYVE-type containing 26 [Source:HGNC Symbol;Acc:HGNC:20761]	protein_coding	0.219	0.8089	0.236	0.9995	0.2239	0.7218
ENSG00000072134	EPN2	epsin 2 [Source:HGNC Symbol;Acc:HGNC:18639]	protein_coding	-0.1187	0.9466	-0.1056	0.9995	0.08004	0.9397
ENSG00000072135	PTPN18	protein tyrosine phosphatase non-receptor type 18 [Source:HGNC Symbol;Acc:HGNC:9649]	protein_coding	0.1353	0.924	0.1515	0.9995	0.1453	0.8694
ENSG00000072163	LIMS2	LIM zinc finger domain containing 2 [Source:HGNC Symbol;Acc:HGNC:16084]	protein_coding	-0.3522	0.8648	-0.3343	0.9995	-0.2897	0.8283
ENSG00000072195	SPEG	striated muscle enriched protein kinase [Source:HGNC Symbol;Acc:HGNC:16901]	protein_coding	0.218	0.944	0.2298	0.9995	0.5542	0.7393
ENSG00000072210	ALDH3A2	aldehyde dehydrogenase 3 family member A2 [Source:HGNC Symbol;Acc:HGNC:403]	protein_coding	-0.3442	0.8449	-0.3222	0.9995	-0.2612	0.8237
ENSG00000072274	TFRC	transferrin receptor [Source:HGNC Symbol;Acc:HGNC:11763]	protein_coding	-0.02197	0.9904	-0.0007378	0.9996	0.0555	0.9462
ENSG00000072310	SREBF1	sterol regulatory element binding transcription factor 1 [Source:HGNC Symbol;Acc:HGNC:11289]	protein_coding	-0.1011	0.9281	-0.08518	0.9995	-0.089	0.9023
ENSG00000072364	AFF4	AF4/FMR2 family member 4 [Source:HGNC Symbol;Acc:HGNC:17869]	protein_coding	-0.05361	0.9738	-0.03347	0.9995	-0.04226	0.9583
ENSG00000072401	UBE2D1	ubiquitin conjugating enzyme E2 D1 [Source:HGNC Symbol;Acc:HGNC:12474]	protein_coding	0.1294	0.9175	0.1444	0.9995	0.1654	0.8181
ENSG00000072415	MPP5	membrane palmitoylated protein 5 [Source:HGNC Symbol;Acc:HGNC:18669]	protein_coding	-0.1274	0.9612	-0.1094	0.9995	-0.1843	0.9135
ENSG00000072422	RHOBTB1	Rho related BTB domain containing 1 [Source:HGNC Symbol;Acc:HGNC:18738]	protein_coding	-0.4874	0.6273	-0.482	0.9661	-0.3184	0.7262
ENSG00000072501	SMC1A	structural maintenance of chromosomes 1A [Source:HGNC Symbol;Acc:HGNC:11111]	protein_coding	-0.001745	0.9992	0.01489	0.9996	-0.001141	0.9992
ENSG00000072506	HSD17B10	hydroxysteroid 17-beta dehydrogenase 10 [Source:HGNC Symbol;Acc:HGNC:4800]	protein_coding	0.06918	0.9606	0.08767	0.9995	0.09293	0.905
ENSG00000072518	MARK2	microtubule affinity regulating kinase 2 [Source:HGNC Symbol;Acc:HGNC:3332]	protein_coding	0.3169	0.6896	0.3326	0.9907	0.3472	0.6423
ENSG00000072571	HMMR	hyaluronan mediated motility receptor [Source:HGNC Symbol;Acc:HGNC:5012]	protein_coding	0.3849	0.8681	0.406	0.9995	0.4303	0.7746
ENSG00000072609	CHFR	checkpoint with forkhead and ring finger domains [Source:HGNC Symbol;Acc:HGNC:20455]	protein_coding	0.12	0.8894	0.1388	0.9995	0.1327	0.8067
ENSG00000072682	P4HA2	prolyl 4-hydroxylase subunit alpha 2 [Source:HGNC Symbol;Acc:HGNC:8547]	protein_coding	-0.004553	0.9992	0.01142	0.9996	0.02253	0.9842
ENSG00000072694	FCGR2B	Fc fragment of IgG receptor IIb [Source:HGNC Symbol;Acc:HGNC:3618]	protein_coding	-0.4255	0.8046	-0.4096	0.9995	-0.2594	0.8392
ENSG00000072736	NFATC3	nuclear factor of activated T cells 3 [Source:HGNC Symbol;Acc:HGNC:7777]	protein_coding	-0.05177	0.9591	-0.03114	0.9995	-0.05449	0.9276
ENSG00000072756	TRNT1	tRNA nucleotidyl transferase 1 [Source:HGNC Symbol;Acc:HGNC:17341]	protein_coding	-0.0676	0.967	-0.03122	0.9995	-0.1159	0.8837
ENSG00000072778	ACADVL	acyl-CoA dehydrogenase very long chain [Source:HGNC Symbol;Acc:HGNC:92]	protein_coding	0.2183	0.7485	0.236	0.9995	0.2172	0.7355
ENSG00000072786	STK10	serine/threonine kinase 10 [Source:HGNC Symbol;Acc:HGNC:11388]	protein_coding	0.1017	0.9367	0.1195	0.9995	0.0926	0.9103
ENSG00000072803	FBXW11	F-box and WD repeat domain containing 11 [Source:HGNC Symbol;Acc:HGNC:13607]	protein_coding	-0.1348	0.8151	-0.1095	0.9995	-0.112	0.8059
ENSG00000072818	ACAP1	ArfGAP with coiled-coil, ankyrin repeat and PH domains 1 [Source:HGNC Symbol;Acc:HGNC:16467]	protein_coding	0.236	0.8874	0.2533	0.9995	0.2977	0.7772
ENSG00000072832	CRMP1	collapsin response mediator protein 1 [Source:HGNC Symbol;Acc:HGNC:2365]	protein_coding	-0.06409	0.9787	-0.04893	0.9995	0.1304	0.9105
ENSG00000072840	EVC	EvC ciliary complex subunit 1 [Source:HGNC Symbol;Acc:HGNC:3497]	protein_coding	0.1513	0.9624	0.1621	0.9995	0.53	0.7764
ENSG00000072849	DERL2	derlin 2 [Source:HGNC Symbol;Acc:HGNC:17943]	protein_coding	0.122	0.9385	0.143	0.9995	0.1322	0.8837
ENSG00000072858	SIDT1	SID1 transmembrane family member 1 [Source:HGNC Symbol;Acc:HGNC:25967]	protein_coding	-0.01496	0.9927	0.009165	0.9996	-0.01315	0.989
ENSG00000072864	NDE1	nudE neurodevelopment protein 1 [Source:HGNC Symbol;Acc:HGNC:17619]	protein_coding	0.2895	0.6311	0.3002	0.9995	0.3322	0.5651
ENSG00000072952	MRVI1	murine retrovirus integration site 1 homolog [Source:HGNC Symbol;Acc:HGNC:7237]	protein_coding	-0.7623	0.6975	-0.742	0.987	-0.603	0.7394
ENSG00000072954	TMEM38A	transmembrane protein 38A [Source:HGNC Symbol;Acc:HGNC:28462]	protein_coding	-0.1843	0.9466	-0.1661	0.9995	-0.1091	0.9393
ENSG00000072958	AP1M1	adaptor related protein complex 1 subunit mu 1 [Source:HGNC Symbol;Acc:HGNC:13667]	protein_coding	0.1973	0.8874	0.2125	0.9995	0.2267	0.7772
ENSG00000073008	PVR	PVR cell adhesion molecule [Source:HGNC Symbol;Acc:HGNC:9705]	protein_coding	0.4139	0.8035	0.4296	0.9995	0.5881	0.6783
ENSG00000073050	XRCC1	X-ray repair cross complementing 1 [Source:HGNC Symbol;Acc:HGNC:12828]	protein_coding	0.2701	0.7485	0.2865	0.9995	0.3129	0.6786
ENSG00000073060	SCARB1	scavenger receptor class B member 1 [Source:HGNC Symbol;Acc:HGNC:1664]	protein_coding	-0.28	0.854	-0.2634	0.9995	-0.2234	0.8241
ENSG00000073111	MCM2	minichromosome maintenance complex component 2 [Source:HGNC Symbol;Acc:HGNC:6944]	protein_coding	0.2166	0.8874	0.2346	0.9995	0.2484	0.78
ENSG00000073150	PANX2	pannexin 2 [Source:HGNC Symbol;Acc:HGNC:8600]	protein_coding	0.8466	0.675	0.8508	0.9753	1.011	0.5641
ENSG00000073169	SELENOO	selenoprotein O [Source:HGNC Symbol;Acc:HGNC:30395]	protein_coding	0.04884	0.9741	0.06663	0.9995	0.07889	0.9213
ENSG00000073282	TP63	tumor protein p63 [Source:HGNC Symbol;Acc:HGNC:15979]	protein_coding	0.04808	0.9831	0.06435	0.9995	0.01053	0.9938
ENSG00000073331	ALPK1	alpha kinase 1 [Source:HGNC Symbol;Acc:HGNC:20917]	protein_coding	-0.0859	0.9385	-0.06718	0.9995	-0.09495	0.8793
ENSG00000073350	LLGL2	LLGL scribble cell polarity complex component 2 [Source:HGNC Symbol;Acc:HGNC:6629]	protein_coding	-0.00505	0.9985	0.01235	0.9996	0.0208	0.9804
ENSG00000073417	PDE8A	phosphodiesterase 8A [Source:HGNC Symbol;Acc:HGNC:8793]	protein_coding	-0.3273	0.6465	-0.312	0.9995	-0.2729	0.703
ENSG00000073464	CLCN4	chloride voltage-gated channel 4 [Source:HGNC Symbol;Acc:HGNC:2022]	protein_coding	-0.4915	0.7937	-0.4746	0.9995	-0.3643	0.794
ENSG00000073536	NLE1	notchless homolog 1 [Source:HGNC Symbol;Acc:HGNC:19889]	protein_coding	0.1898	0.8899	0.2167	0.9995	0.1785	0.8272
ENSG00000073584	SMARCE1	SWI/SNF related, matrix associated, actin dependent regulator of chromatin, subfamily e, member 1 [Source:HGNC Symbol;Acc:HGNC:11109]	protein_coding	-0.2667	0.9338	-0.2476	0.9995	-0.3982	0.8339
ENSG00000073605	GSDMB	gasdermin B [Source:HGNC Symbol;Acc:HGNC:23690]	protein_coding	0.6125	0.4474	0.6305	0.4651	0.6149	0.5641
ENSG00000073614	KDM5A	lysine demethylase 5A [Source:HGNC Symbol;Acc:HGNC:9886]	protein_coding	-0.01341	0.9904	0.005253	0.9996	-0.01894	0.9768
ENSG00000073711	PPP2R3A	protein phosphatase 2 regulatory subunit B''alpha [Source:HGNC Symbol;Acc:HGNC:9307]	protein_coding	-0.2195	0.8499	-0.2007	0.9995	-0.1937	0.7931
ENSG00000073712	FERMT2	fermitin family member 2 [Source:HGNC Symbol;Acc:HGNC:15767]	protein_coding	-0.2496	0.8918	-0.2298	0.9995	-0.1167	0.9135
ENSG00000073737	DHRS9	dehydrogenase/reductase 9 [Source:HGNC Symbol;Acc:HGNC:16888]	protein_coding	-0.3105	0.889	-0.2911	0.9995	-0.2692	0.8399
ENSG00000073756	PTGS2	prostaglandin-endoperoxide synthase 2 [Source:HGNC Symbol;Acc:HGNC:9605]	protein_coding	1.417	0.6376	1.436	0.4243	1.61	0.5922
ENSG00000073792	IGF2BP2	insulin like growth factor 2 mRNA binding protein 2 [Source:HGNC Symbol;Acc:HGNC:28867]	protein_coding	0.2147	0.8994	0.2288	0.9995	0.3024	0.7626
ENSG00000073803	MAP3K13	mitogen-activated protein kinase kinase kinase 13 [Source:HGNC Symbol;Acc:HGNC:6852]	protein_coding	-0.1256	0.9313	-0.1044	0.9995	-0.1185	0.8898
ENSG00000073849	ST6GAL1	ST6 beta-galactoside alpha-2,6-sialyltransferase 1 [Source:HGNC Symbol;Acc:HGNC:10860]	protein_coding	-0.4472	0.8561	-0.4306	0.9995	-0.2745	0.8819
ENSG00000073861	TBX21	T-box transcription factor 21 [Source:HGNC Symbol;Acc:HGNC:11599]	protein_coding	1.011	0.01406	1.032	0.009631	1.068	0.3238
ENSG00000073910	FRY	FRY microtubule binding protein [Source:HGNC Symbol;Acc:HGNC:20367]	protein_coding	-0.6598	0.5794	-0.6384	0.7939	-0.645	0.6397
ENSG00000073921	PICALM	phosphatidylinositol binding clathrin assembly protein [Source:HGNC Symbol;Acc:HGNC:15514]	protein_coding	0.04681	0.97	0.06675	0.9995	0.03706	0.9558
ENSG00000073969	NSF	N-ethylmaleimide sensitive factor, vesicle fusing ATPase [Source:HGNC Symbol;Acc:HGNC:8016]	protein_coding	-0.2178	0.7358	-0.1944	0.9995	-0.2026	0.721
ENSG00000074047	GLI2	GLI family zinc finger 2 [Source:HGNC Symbol;Acc:HGNC:4318]	protein_coding	-0.1652	0.9606	-0.1467	0.9995	0.1756	0.93
ENSG00000074054	CLASP1	cytoplasmic linker associated protein 1 [Source:HGNC Symbol;Acc:HGNC:17088]	protein_coding	-0.02001	0.9874	-0.004598	0.9996	-0.0107	0.9892
ENSG00000074071	MRPS34	mitochondrial ribosomal protein S34 [Source:HGNC Symbol;Acc:HGNC:16618]	protein_coding	0.1977	0.8642	0.2146	0.9995	0.2398	0.7423
ENSG00000074181	NOTCH3	notch receptor 3 [Source:HGNC Symbol;Acc:HGNC:7883]	protein_coding	-0.3707	0.8874	-0.3534	0.9995	-0.4136	0.7999
ENSG00000074201	CLNS1A	chloride nucleotide-sensitive channel 1A [Source:HGNC Symbol;Acc:HGNC:2080]	protein_coding	-0.06154	0.9613	-0.04014	0.9995	-0.02644	0.9768
ENSG00000074211	PPP2R2C	protein phosphatase 2 regulatory subunit Bgamma [Source:HGNC Symbol;Acc:HGNC:9306]	protein_coding	0.1799	0.9765	0.1941	0.9995	0.3275	0.8711
ENSG00000074219	TEAD2	TEA domain transcription factor 2 [Source:HGNC Symbol;Acc:HGNC:11715]	protein_coding	-0.01129	0.9978	0.004085	0.9996	0.306	0.8272
ENSG00000074266	EED	embryonic ectoderm development [Source:HGNC Symbol;Acc:HGNC:3188]	protein_coding	0.07715	0.9606	0.1007	0.9995	0.07477	0.9288
ENSG00000074276	CDHR2	cadherin related family member 2 [Source:HGNC Symbol;Acc:HGNC:18231]	protein_coding	-0.01709	0.9962	0.01006	0.9996	-0.1134	0.9504
ENSG00000074319	TSG101	tumor susceptibility 101 [Source:HGNC Symbol;Acc:HGNC:15971]	protein_coding	0.02204	0.9852	0.04339	0.9995	0.03369	0.9574
ENSG00000074356	NCBP3	nuclear cap binding subunit 3 [Source:HGNC Symbol;Acc:HGNC:24612]	protein_coding	0.1698	0.7408	0.1908	0.9995	0.177	0.7089
ENSG00000074370	ATP2A3	ATPase sarcoplasmic/endoplasmic reticulum Ca2+ transporting 3 [Source:HGNC Symbol;Acc:HGNC:813]	protein_coding	0.116	0.9231	0.1334	0.9995	0.1525	0.8561
ENSG00000074410	CA12	carbonic anhydrase 12 [Source:HGNC Symbol;Acc:HGNC:1371]	protein_coding	-0.001228	0.9992	0.01442	0.9996	-0.06657	0.9572
ENSG00000074416	MGLL	monoglyceride lipase [Source:HGNC Symbol;Acc:HGNC:17038]	protein_coding	0.1491	0.9072	0.1663	0.9995	0.1115	0.8837
ENSG00000074527	NTN4	netrin 4 [Source:HGNC Symbol;Acc:HGNC:13658]	protein_coding	-0.4236	0.8296	-0.4055	0.9995	-0.1647	0.9115
ENSG00000074582	BCS1L	BCS1 homolog, ubiquinol-cytochrome c reductase complex chaperone [Source:HGNC Symbol;Acc:HGNC:1020]	protein_coding	-0.05068	0.97	-0.03158	0.9995	-0.04528	0.9548
ENSG00000074590	NUAK1	NUAK family kinase 1 [Source:HGNC Symbol;Acc:HGNC:14311]	protein_coding	-0.6379	0.6074	-0.6176	0.8545	-0.3884	0.7785
ENSG00000074603	DPP8	dipeptidyl peptidase 8 [Source:HGNC Symbol;Acc:HGNC:16490]	protein_coding	-0.07128	0.9537	-0.04982	0.9995	-0.05032	0.9392
ENSG00000074621	SLC24A1	solute carrier family 24 member 1 [Source:HGNC Symbol;Acc:HGNC:10975]	protein_coding	-0.2899	0.6946	-0.2712	0.9995	-0.2467	0.7125
ENSG00000074657	ZNF532	zinc finger protein 532 [Source:HGNC Symbol;Acc:HGNC:30940]	protein_coding	-0.2658	0.8577	-0.2488	0.9995	-0.3284	0.717
ENSG00000074660	SCARF1	scavenger receptor class F member 1 [Source:HGNC Symbol;Acc:HGNC:16820]	protein_coding	0.1982	0.9217	0.2166	0.9995	0.2869	0.8144
ENSG00000074695	LMAN1	lectin, mannose binding 1 [Source:HGNC Symbol;Acc:HGNC:6631]	protein_coding	-0.1509	0.9466	-0.13	0.9995	-0.07504	0.9614
ENSG00000074696	HACD3	3-hydroxyacyl-CoA dehydratase 3 [Source:HGNC Symbol;Acc:HGNC:24175]	protein_coding	-0.0499	0.9761	-0.02985	0.9995	-0.03352	0.9721
ENSG00000074755	ZZEF1	zinc finger ZZ-type and EF-hand domain containing 1 [Source:HGNC Symbol;Acc:HGNC:29027]	protein_coding	-0.01864	0.9902	-0.001649	0.9996	-0.03624	0.9606
ENSG00000074800	ENO1	enolase 1 [Source:HGNC Symbol;Acc:HGNC:3350]	protein_coding	0.3582	0.7294	0.3759	0.9995	0.4569	0.6786
ENSG00000074842	MYDGF	myeloid derived growth factor [Source:HGNC Symbol;Acc:HGNC:16948]	protein_coding	0.2276	0.8329	0.2444	0.9995	0.2153	0.7582
ENSG00000074855	ANO8	anoctamin 8 [Source:HGNC Symbol;Acc:HGNC:29329]	protein_coding	0.03189	0.9883	0.04907	0.9995	0.0526	0.9606
ENSG00000074935	TUBE1	tubulin epsilon 1 [Source:HGNC Symbol;Acc:HGNC:20775]	protein_coding	-0.2715	0.825	-0.2457	0.9995	-0.2749	0.717
ENSG00000074964	ARHGEF10L	Rho guanine nucleotide exchange factor 10 like [Source:HGNC Symbol;Acc:HGNC:25540]	protein_coding	0.08758	0.9612	0.1041	0.9995	0.1111	0.9135
ENSG00000074966	TXK	TXK tyrosine kinase [Source:HGNC Symbol;Acc:HGNC:12434]	protein_coding	0.5192	0.5398	0.5372	0.7839	0.5776	0.5641
ENSG00000075073	TACR2	tachykinin receptor 2 [Source:HGNC Symbol;Acc:HGNC:11527]	protein_coding	1.017	0.4994	1.023	0.7425	0.964	0.6191
ENSG00000075131	TIPIN	TIMELESS interacting protein [Source:HGNC Symbol;Acc:HGNC:30750]	protein_coding	-0.1381	0.9466	-0.1218	0.9995	-0.04122	0.9768
ENSG00000075142	SRI	sorcin [Source:HGNC Symbol;Acc:HGNC:11292]	protein_coding	0.09212	0.9461	0.1141	0.9995	0.1119	0.8737
ENSG00000075151	EIF4G3	eukaryotic translation initiation factor 4 gamma 3 [Source:HGNC Symbol;Acc:HGNC:3298]	protein_coding	-0.1964	0.8499	-0.179	0.9995	-0.1899	0.7746
ENSG00000075188	NUP37	nucleoporin 37 [Source:HGNC Symbol;Acc:HGNC:29929]	protein_coding	0.04804	0.9805	0.06888	0.9995	0.06789	0.9482
ENSG00000075213	SEMA3A	semaphorin 3A [Source:HGNC Symbol;Acc:HGNC:10723]	protein_coding	0.1281	0.9612	0.1411	0.9995	0.1197	0.946
ENSG00000075218	GTSE1	G2 and S-phase expressed 1 [Source:HGNC Symbol;Acc:HGNC:13698]	protein_coding	0.6578	0.4151	0.6732	0.6208	0.7751	0.5217
ENSG00000075223	SEMA3C	semaphorin 3C [Source:HGNC Symbol;Acc:HGNC:10725]	protein_coding	-0.1385	0.9495	-0.1195	0.9995	-0.2247	0.8412
ENSG00000075234	TTC38	tetratricopeptide repeat domain 38 [Source:HGNC Symbol;Acc:HGNC:26082]	protein_coding	0.1593	0.897	0.1771	0.9995	0.1488	0.8372
ENSG00000075239	ACAT1	acetyl-CoA acetyltransferase 1 [Source:HGNC Symbol;Acc:HGNC:93]	protein_coding	-0.2959	0.8644	-0.2727	0.9995	-0.2484	0.8275
ENSG00000075240	GRAMD4	GRAM domain containing 4 [Source:HGNC Symbol;Acc:HGNC:29113]	protein_coding	0.253	0.8114	0.269	0.9995	0.2709	0.6997
ENSG00000075275	CELSR1	cadherin EGF LAG seven-pass G-type receptor 1 [Source:HGNC Symbol;Acc:HGNC:1850]	protein_coding	0.1694	0.923	0.1863	0.9995	0.1988	0.8325
ENSG00000075290	WNT8B	Wnt family member 8B [Source:HGNC Symbol;Acc:HGNC:12789]	protein_coding	-0.3971	0.9261	-0.3666	0.9995	-0.04665	0.989
ENSG00000075292	ZNF638	zinc finger protein 638 [Source:HGNC Symbol;Acc:HGNC:17894]	protein_coding	-0.006127	0.9972	0.01592	0.9995	0.02109	0.9792
ENSG00000075303	SLC25A40	solute carrier family 25 member 40 [Source:HGNC Symbol;Acc:HGNC:29680]	protein_coding	-0.147	0.9246	-0.1258	0.9995	-0.09252	0.9277
ENSG00000075336	TIMM21	translocase of inner mitochondrial membrane 21 [Source:HGNC Symbol;Acc:HGNC:25010]	protein_coding	-0.02815	0.9865	-0.006013	0.9996	-0.03185	0.9721
ENSG00000075340	ADD2	adducin 2 [Source:HGNC Symbol;Acc:HGNC:244]	protein_coding	-0.1795	0.9524	-0.1618	0.9995	-0.03819	0.9814
ENSG00000075391	RASAL2	RAS protein activator like 2 [Source:HGNC Symbol;Acc:HGNC:9874]	protein_coding	0.1872	0.9702	0.2165	0.9995	-0.08242	0.9764
ENSG00000075399	VPS9D1	VPS9 domain containing 1 [Source:HGNC Symbol;Acc:HGNC:13526]	protein_coding	0.4358	0.7485	0.4533	0.9642	0.5229	0.6783
ENSG00000075413	MARK3	microtubule affinity regulating kinase 3 [Source:HGNC Symbol;Acc:HGNC:6897]	protein_coding	0.1091	0.8965	0.1276	0.9995	0.09245	0.8549
ENSG00000075415	SLC25A3	solute carrier family 25 member 3 [Source:HGNC Symbol;Acc:HGNC:10989]	protein_coding	-0.003134	0.9985	0.01477	0.9996	0.0196	0.979
ENSG00000075420	FNDC3B	fibronectin type III domain containing 3B [Source:HGNC Symbol;Acc:HGNC:24670]	protein_coding	-0.1918	0.9173	-0.1716	0.9995	-0.1674	0.875
ENSG00000075426	FOSL2	FOS like 2, AP-1 transcription factor subunit [Source:HGNC Symbol;Acc:HGNC:3798]	protein_coding	-0.002507	0.9992	0.0156	0.9996	-0.05491	0.9761
ENSG00000075539	FRYL	FRY like transcription coactivator [Source:HGNC Symbol;Acc:HGNC:29127]	protein_coding	-0.009332	0.9912	0.01137	0.9996	0.001149	0.998
ENSG00000075568	TMEM131	transmembrane protein 131 [Source:HGNC Symbol;Acc:HGNC:30366]	protein_coding	-0.03945	0.9795	-0.02281	0.9995	-0.03858	0.9632
ENSG00000075618	FSCN1	fascin actin-bundling protein 1 [Source:HGNC Symbol;Acc:HGNC:11148]	protein_coding	0.4446	0.8412	0.4583	0.9995	0.4107	0.7931
ENSG00000075624	ACTB	actin beta [Source:HGNC Symbol;Acc:HGNC:132]	protein_coding	0.1612	0.9072	0.1789	0.9995	0.2283	0.806
ENSG00000075643	MOCOS	molybdenum cofactor sulfurase [Source:HGNC Symbol;Acc:HGNC:18234]	protein_coding	-0.4496	0.7937	-0.4344	0.9995	-0.2044	0.8694
ENSG00000075651	PLD1	phospholipase D1 [Source:HGNC Symbol;Acc:HGNC:9067]	protein_coding	-0.3608	0.6861	-0.3409	0.9995	-0.3498	0.6786
ENSG00000075673	ATP12A	ATPase H+/K+ transporting non-gastric alpha2 subunit [Source:HGNC Symbol;Acc:HGNC:13816]	protein_coding	-0.5487	0.9338	-0.5163	0.9995	-0.241	0.9606
ENSG00000075702	WDR62	WD repeat domain 62 [Source:HGNC Symbol;Acc:HGNC:24502]	protein_coding	0.5443	0.4535	0.561	0.7839	0.6606	0.5384
ENSG00000075711	DLG1	discs large MAGUK scaffold protein 1 [Source:HGNC Symbol;Acc:HGNC:2900]	protein_coding	-0.2051	0.8329	-0.1845	0.9995	-0.1995	0.7564
ENSG00000075785	RAB7A	RAB7A, member RAS oncogene family [Source:HGNC Symbol;Acc:HGNC:9788]	protein_coding	0.1339	0.8499	0.1509	0.9995	0.1442	0.7902
ENSG00000075826	SEC31B	SEC31 homolog B, COPII coat complex component [Source:HGNC Symbol;Acc:HGNC:23197]	protein_coding	0.1051	0.9612	0.1267	0.9995	0.009298	0.9944
ENSG00000075856	SART3	spliceosome associated factor 3, U4/U6 recycling protein [Source:HGNC Symbol;Acc:HGNC:16860]	protein_coding	0.182	0.8874	0.1975	0.9995	0.2517	0.7278
ENSG00000075884	ARHGAP15	Rho GTPase activating protein 15 [Source:HGNC Symbol;Acc:HGNC:21030]	protein_coding	-0.243	0.8874	-0.2195	0.9995	-0.2423	0.8241
ENSG00000075914	EXOSC7	exosome component 7 [Source:HGNC Symbol;Acc:HGNC:28112]	protein_coding	0.01137	0.9948	0.02981	0.9995	0.03698	0.967
ENSG00000075945	KIFAP3	kinesin associated protein 3 [Source:HGNC Symbol;Acc:HGNC:17060]	protein_coding	-0.07411	0.9591	-0.05223	0.9995	-0.04405	0.9548
ENSG00000075975	MKRN2	makorin ring finger protein 2 [Source:HGNC Symbol;Acc:HGNC:7113]	protein_coding	-0.0474	0.9581	-0.03453	0.9995	-0.03215	0.9519
ENSG00000076003	MCM6	minichromosome maintenance complex component 6 [Source:HGNC Symbol;Acc:HGNC:6949]	protein_coding	0.07692	0.9528	0.09758	0.9995	0.08881	0.904
ENSG00000076043	REXO2	RNA exonuclease 2 [Source:HGNC Symbol;Acc:HGNC:17851]	protein_coding	-0.2278	0.822	-0.2065	0.9995	-0.2182	0.7445
ENSG00000076067	RBMS2	RNA binding motif single stranded interacting protein 2 [Source:HGNC Symbol;Acc:HGNC:9909]	protein_coding	-0.03259	0.9872	-0.01487	0.9996	-0.002458	0.9979
ENSG00000076108	BAZ2A	bromodomain adjacent to zinc finger domain 2A [Source:HGNC Symbol;Acc:HGNC:962]	protein_coding	0.0454	0.9738	0.06254	0.9995	-0.01029	0.9905
ENSG00000076201	PTPN23	protein tyrosine phosphatase non-receptor type 23 [Source:HGNC Symbol;Acc:HGNC:14406]	protein_coding	0.2401	0.8074	0.2563	0.9995	0.2511	0.712
ENSG00000076242	MLH1	mutL homolog 1 [Source:HGNC Symbol;Acc:HGNC:7127]	protein_coding	-0.09347	0.9378	-0.07205	0.9995	-0.08267	0.9109
ENSG00000076248	UNG	uracil DNA glycosylase [Source:HGNC Symbol;Acc:HGNC:12572]	protein_coding	-0.05329	0.9613	-0.03963	0.9995	-0.006422	0.9935
ENSG00000076258	FMO4	flavin containing dimethylaniline monoxygenase 4 [Source:HGNC Symbol;Acc:HGNC:3772]	protein_coding	-0.129	0.9378	-0.1025	0.9995	-0.1606	0.8635
ENSG00000076321	KLHL20	kelch like family member 20 [Source:HGNC Symbol;Acc:HGNC:25056]	protein_coding	0.02221	0.9883	0.04411	0.9995	0.04383	0.9529
ENSG00000076351	SLC46A1	solute carrier family 46 member 1 [Source:HGNC Symbol;Acc:HGNC:30521]	protein_coding	-0.4253	0.8966	-0.4061	0.9995	-0.6295	0.7643
ENSG00000076356	PLXNA2	plexin A2 [Source:HGNC Symbol;Acc:HGNC:9100]	protein_coding	-0.05517	0.9797	-0.03757	0.9995	0.1071	0.9268
ENSG00000076513	ANKRD13A	ankyrin repeat domain 13A [Source:HGNC Symbol;Acc:HGNC:21268]	protein_coding	-0.2805	0.8012	-0.2618	0.9995	-0.2493	0.7445
ENSG00000076554	TPD52	tumor protein D52 [Source:HGNC Symbol;Acc:HGNC:12005]	protein_coding	-0.2834	0.9244	-0.2566	0.9995	-0.3789	0.8412
ENSG00000076555	ACACB	acetyl-CoA carboxylase beta [Source:HGNC Symbol;Acc:HGNC:85]	protein_coding	-0.2924	0.8144	-0.2763	0.9995	-0.2162	0.7899
ENSG00000076604	TRAF4	TNF receptor associated factor 4 [Source:HGNC Symbol;Acc:HGNC:12034]	protein_coding	0.2552	0.8619	0.2718	0.9995	0.3102	0.7411
ENSG00000076641	PAG1	phosphoprotein membrane anchor with glycosphingolipid microdomains 1 [Source:HGNC Symbol;Acc:HGNC:30043]	protein_coding	-0.1114	0.9322	-0.0883	0.9995	-0.09873	0.8875
ENSG00000076650	GPATCH1	G-patch domain containing 1 [Source:HGNC Symbol;Acc:HGNC:24658]	protein_coding	-0.06413	0.9663	-0.04599	0.9995	-0.007298	0.9938
ENSG00000076662	ICAM3	intercellular adhesion molecule 3 [Source:HGNC Symbol;Acc:HGNC:5346]	protein_coding	-0.006798	0.9962	0.01378	0.9995	0.01863	0.9804
ENSG00000076685	NT5C2	5'-nucleotidase, cytosolic II [Source:HGNC Symbol;Acc:HGNC:8022]	protein_coding	-0.01779	0.9904	0.0008269	0.9996	0.02298	0.9776
ENSG00000076706	MCAM	melanoma cell adhesion molecule [Source:HGNC Symbol;Acc:HGNC:6934]	protein_coding	0.1142	0.9755	0.1334	0.9995	0.3888	0.8272
ENSG00000076716	GPC4	glypican 4 [Source:HGNC Symbol;Acc:HGNC:4452]	protein_coding	0.02036	0.9951	0.03196	0.9995	0.317	0.8339
ENSG00000076770	MBNL3	muscleblind like splicing regulator 3 [Source:HGNC Symbol;Acc:HGNC:20564]	protein_coding	-0.4388	0.6025	-0.4142	0.9233	-0.4899	0.5641
ENSG00000076826	CAMSAP3	calmodulin regulated spectrin associated protein family member 3 [Source:HGNC Symbol;Acc:HGNC:29307]	protein_coding	-0.1698	0.9338	-0.1533	0.9995	-0.05491	0.969
ENSG00000076864	RAP1GAP	RAP1 GTPase activating protein [Source:HGNC Symbol;Acc:HGNC:9858]	protein_coding	0.3289	0.8994	0.3484	0.9995	0.3225	0.8428
ENSG00000076924	XAB2	XPA binding protein 2 [Source:HGNC Symbol;Acc:HGNC:14089]	protein_coding	0.1254	0.9154	0.1406	0.9995	0.1591	0.8237
ENSG00000076928	ARHGEF1	Rho guanine nucleotide exchange factor 1 [Source:HGNC Symbol;Acc:HGNC:681]	protein_coding	0.2051	0.8874	0.2223	0.9995	0.2666	0.78
ENSG00000076944	STXBP2	syntaxin binding protein 2 [Source:HGNC Symbol;Acc:HGNC:11445]	protein_coding	0.4357	0.6588	0.4528	0.8979	0.4653	0.6284
ENSG00000076984	MAP2K7	mitogen-activated protein kinase kinase 7 [Source:HGNC Symbol;Acc:HGNC:6847]	protein_coding	0.275	0.6946	0.2899	0.9995	0.2959	0.6559
ENSG00000077044	DGKD	diacylglycerol kinase delta [Source:HGNC Symbol;Acc:HGNC:2851]	protein_coding	-0.1237	0.8994	-0.1041	0.9995	-0.1092	0.8499
ENSG00000077092	RARB	retinoic acid receptor beta [Source:HGNC Symbol;Acc:HGNC:9865]	protein_coding	0.1303	0.9661	0.1525	0.9995	0.2776	0.8727
ENSG00000077097	TOP2B	DNA topoisomerase II beta [Source:HGNC Symbol;Acc:HGNC:11990]	protein_coding	-0.1431	0.8936	-0.1216	0.9995	-0.1235	0.8478
ENSG00000077147	TM9SF3	transmembrane 9 superfamily member 3 [Source:HGNC Symbol;Acc:HGNC:21529]	protein_coding	-0.2229	0.8759	-0.2007	0.9995	-0.1985	0.8154
ENSG00000077150	NFKB2	nuclear factor kappa B subunit 2 [Source:HGNC Symbol;Acc:HGNC:7795]	protein_coding	0.3212	0.8522	0.338	0.9995	0.3208	0.7748
ENSG00000077152	UBE2T	ubiquitin conjugating enzyme E2 T [Source:HGNC Symbol;Acc:HGNC:25009]	protein_coding	0.2993	0.883	0.3195	0.9995	0.2709	0.8176
ENSG00000077157	PPP1R12B	protein phosphatase 1 regulatory subunit 12B [Source:HGNC Symbol;Acc:HGNC:7619]	protein_coding	-0.6076	0.3495	-0.5878	0.4886	-0.6836	0.5217
ENSG00000077232	DNAJC10	DnaJ heat shock protein family (Hsp40) member C10 [Source:HGNC Symbol;Acc:HGNC:24637]	protein_coding	-0.2238	0.8633	-0.2021	0.9995	-0.1873	0.8247
ENSG00000077235	GTF3C1	general transcription factor IIIC subunit 1 [Source:HGNC Symbol;Acc:HGNC:4664]	protein_coding	0.1171	0.9331	0.1335	0.9995	0.133	0.865
ENSG00000077238	IL4R	interleukin 4 receptor [Source:HGNC Symbol;Acc:HGNC:6015]	protein_coding	0.2473	0.8854	0.2641	0.9995	0.2577	0.7936
ENSG00000077254	USP33	ubiquitin specific peptidase 33 [Source:HGNC Symbol;Acc:HGNC:20059]	protein_coding	-0.1258	0.923	-0.1037	0.9995	-0.1009	0.8953
ENSG00000077264	PAK3	p21 (RAC1) activated kinase 3 [Source:HGNC Symbol;Acc:HGNC:8592]	protein_coding	0.2228	0.8966	0.245	0.9995	0.2875	0.7751
ENSG00000077274	CAPN6	calpain 6 [Source:HGNC Symbol;Acc:HGNC:1483]	protein_coding	-0.4817	0.8994	-0.4562	0.9995	-0.5103	0.7936
ENSG00000077312	SNRPA	small nuclear ribonucleoprotein polypeptide A [Source:HGNC Symbol;Acc:HGNC:11151]	protein_coding	0.2131	0.88	0.2297	0.9995	0.2504	0.751
ENSG00000077327	SPAG6	sperm associated antigen 6 [Source:HGNC Symbol;Acc:HGNC:11215]	protein_coding	-0.142	0.9231	-0.1259	0.9995	-0.05866	0.9546
ENSG00000077380	DYNC1I2	dynein cytoplasmic 1 intermediate chain 2 [Source:HGNC Symbol;Acc:HGNC:2964]	protein_coding	-0.1943	0.8639	-0.1729	0.9995	-0.1967	0.7834
ENSG00000077420	APBB1IP	amyloid beta precursor protein binding family B member 1 interacting protein [Source:HGNC Symbol;Acc:HGNC:17379]	protein_coding	0.1252	0.9269	0.1447	0.9995	0.1325	0.8662
ENSG00000077454	LRCH4	leucine rich repeats and calponin homology domain containing 4 [Source:HGNC Symbol;Acc:HGNC:6691]	protein_coding	0.2023	0.8965	0.2179	0.9995	0.2584	0.7899
ENSG00000077458	FAM76B	family with sequence similarity 76 member B [Source:HGNC Symbol;Acc:HGNC:28492]	protein_coding	-0.1572	0.9154	-0.1376	0.9995	-0.1124	0.8983
ENSG00000077463	SIRT6	sirtuin 6 [Source:HGNC Symbol;Acc:HGNC:14934]	protein_coding	0.3481	0.6975	0.3631	0.9949	0.4061	0.6128
ENSG00000077498	TYR	tyrosinase [Source:HGNC Symbol;Acc:HGNC:12442]	protein_coding	0.357	0.9466	0.3734	0.9995	-0.6859	0.8684
ENSG00000077514	POLD3	DNA polymerase delta 3, accessory subunit [Source:HGNC Symbol;Acc:HGNC:20932]	protein_coding	0.03912	0.9775	0.05415	0.9995	0.08645	0.8983
ENSG00000077549	CAPZB	capping actin protein of muscle Z-line subunit beta [Source:HGNC Symbol;Acc:HGNC:1491]	protein_coding	0.1657	0.846	0.182	0.9995	0.1563	0.8156
ENSG00000077585	GPR137B	G protein-coupled receptor 137B [Source:HGNC Symbol;Acc:HGNC:11862]	protein_coding	0.1694	0.8644	0.1881	0.9995	0.1831	0.7562
ENSG00000077616	NAALAD2	N-acetylated alpha-linked acidic dipeptidase 2 [Source:HGNC Symbol;Acc:HGNC:14526]	protein_coding	-0.606	0.7655	-0.5818	0.9995	-0.5249	0.703
ENSG00000077684	JADE1	jade family PHD finger 1 [Source:HGNC Symbol;Acc:HGNC:30027]	protein_coding	-0.1325	0.9173	-0.1215	0.9995	-0.04956	0.9482
ENSG00000077713	SLC25A43	solute carrier family 25 member 43 [Source:HGNC Symbol;Acc:HGNC:30557]	protein_coding	-0.1763	0.8281	-0.171	0.9995	-0.1304	0.826
ENSG00000077721	UBE2A	ubiquitin conjugating enzyme E2 A [Source:HGNC Symbol;Acc:HGNC:12472]	protein_coding	0.1384	0.8233	0.156	0.9995	0.1454	0.7496
ENSG00000077782	FGFR1	fibroblast growth factor receptor 1 [Source:HGNC Symbol;Acc:HGNC:3688]	protein_coding	-0.3948	0.8114	-0.3776	0.9995	-0.2922	0.814
ENSG00000077942	FBLN1	fibulin 1 [Source:HGNC Symbol;Acc:HGNC:3600]	protein_coding	-0.9366	0.3495	-0.9181	0.4614	-0.901	0.5651
ENSG00000077943	ITGA8	integrin subunit alpha 8 [Source:HGNC Symbol;Acc:HGNC:6144]	protein_coding	-1.334	0.1685	-1.314	0.1376	-1.299	0.5413
ENSG00000077984	CST7	cystatin F [Source:HGNC Symbol;Acc:HGNC:2479]	protein_coding	0.5784	0.4245	0.5977	0.4882	0.5779	0.5641
ENSG00000078018	MAP2	microtubule associated protein 2 [Source:HGNC Symbol;Acc:HGNC:6839]	protein_coding	-0.1833	0.9352	-0.1637	0.9995	-0.2494	0.8726
ENSG00000078043	PIAS2	protein inhibitor of activated STAT 2 [Source:HGNC Symbol;Acc:HGNC:17311]	protein_coding	-0.1226	0.9349	-0.09914	0.9995	-0.1264	0.88
ENSG00000078053	AMPH	amphiphysin [Source:HGNC Symbol;Acc:HGNC:471]	protein_coding	0.5353	0.8458	0.5554	0.9995	0.5283	0.7423
ENSG00000078061	ARAF	A-Raf proto-oncogene, serine/threonine kinase [Source:HGNC Symbol;Acc:HGNC:646]	protein_coding	0.1093	0.9107	0.1264	0.9995	0.1148	0.841
ENSG00000078070	MCCC1	methylcrotonoyl-CoA carboxylase 1 [Source:HGNC Symbol;Acc:HGNC:6936]	protein_coding	-0.2983	0.7566	-0.2763	0.9995	-0.3087	0.6972
ENSG00000078081	LAMP3	lysosomal associated membrane protein 3 [Source:HGNC Symbol;Acc:HGNC:14582]	protein_coding	0.3255	0.8538	0.3446	0.9995	0.3454	0.7604
ENSG00000078098	FAP	fibroblast activation protein alpha [Source:HGNC Symbol;Acc:HGNC:3590]	protein_coding	-0.1903	0.8598	-0.172	0.9995	-0.17	0.8148
ENSG00000078114	NEBL	nebulette [Source:HGNC Symbol;Acc:HGNC:16932]	protein_coding	-0.3153	0.8321	-0.2931	0.9995	-0.404	0.7168
ENSG00000078124	ACER3	alkaline ceramidase 3 [Source:HGNC Symbol;Acc:HGNC:16066]	protein_coding	-0.05635	0.97	-0.03586	0.9995	-0.01268	0.9895
ENSG00000078140	UBE2K	ubiquitin conjugating enzyme E2 K [Source:HGNC Symbol;Acc:HGNC:4914]	protein_coding	0.006141	0.9968	0.02751	0.9995	0.02226	0.977
ENSG00000078142	PIK3C3	phosphatidylinositol 3-kinase catalytic subunit type 3 [Source:HGNC Symbol;Acc:HGNC:8974]	protein_coding	-0.225	0.8874	-0.2024	0.9995	-0.2052	0.8272
ENSG00000078177	N4BP2	NEDD4 binding protein 2 [Source:HGNC Symbol;Acc:HGNC:29851]	protein_coding	-0.2958	0.7358	-0.275	0.9995	-0.2518	0.7157
ENSG00000078246	TULP3	TUB like protein 3 [Source:HGNC Symbol;Acc:HGNC:12425]	protein_coding	-0.04046	0.9821	-0.02839	0.9995	0.1003	0.9103
ENSG00000078269	SYNJ2	synaptojanin 2 [Source:HGNC Symbol;Acc:HGNC:11504]	protein_coding	0.1144	0.9524	0.132	0.9995	0.1972	0.8482
ENSG00000078295	ADCY2	adenylate cyclase 2 [Source:HGNC Symbol;Acc:HGNC:233]	protein_coding	-0.1205	0.9843	-0.09881	0.9995	0.1466	0.969
ENSG00000078304	PPP2R5C	protein phosphatase 2 regulatory subunit B'gamma [Source:HGNC Symbol;Acc:HGNC:9311]	protein_coding	-0.1614	0.8874	-0.1394	0.9995	-0.1025	0.88
ENSG00000078328	RBFOX1	RNA binding fox-1 homolog 1 [Source:HGNC Symbol;Acc:HGNC:18222]	protein_coding	0.3976	0.901	0.415	0.9995	0.5516	0.7838
ENSG00000078369	GNB1	G protein subunit beta 1 [Source:HGNC Symbol;Acc:HGNC:4396]	protein_coding	0.2061	0.7999	0.2231	0.9995	0.185	0.7746
ENSG00000078399	HOXA9	homeobox A9 [Source:HGNC Symbol;Acc:HGNC:5109]	protein_coding	-0.1537	0.9755	-0.1388	0.9995	-0.1986	0.9446
ENSG00000078401	EDN1	endothelin 1 [Source:HGNC Symbol;Acc:HGNC:3176]	protein_coding	0.4119	0.8711	0.4327	0.9995	0.4609	0.8007
ENSG00000078403	MLLT10	MLLT10 histone lysine methyltransferase DOT1L cofactor [Source:HGNC Symbol;Acc:HGNC:16063]	protein_coding	0.03912	0.9781	0.05906	0.9995	0.05486	0.938
ENSG00000078487	ZCWPW1	zinc finger CW-type and PWWP domain containing 1 [Source:HGNC Symbol;Acc:HGNC:23486]	protein_coding	-0.1704	0.9081	-0.1497	0.9995	-0.1318	0.8671
ENSG00000078549	ADCYAP1R1	ADCYAP receptor type I [Source:HGNC Symbol;Acc:HGNC:242]	protein_coding	-0.03586	0.9949	-0.008089	0.9996	0.43	0.8799
ENSG00000078589	P2RY10	P2Y receptor family member 10 [Source:HGNC Symbol;Acc:HGNC:19906]	protein_coding	-0.102	0.9605	-0.08012	0.9995	-0.1588	0.8728
ENSG00000078596	ITM2A	integral membrane protein 2A [Source:HGNC Symbol;Acc:HGNC:6173]	protein_coding	-0.3018	0.8874	-0.2772	0.9995	-0.2692	0.8387
ENSG00000078618	NRDC	nardilysin convertase [Source:HGNC Symbol;Acc:HGNC:7995]	protein_coding	-0.07988	0.9606	-0.0593	0.9995	-0.05817	0.9504
ENSG00000078668	VDAC3	voltage dependent anion channel 3 [Source:HGNC Symbol;Acc:HGNC:12674]	protein_coding	-0.04285	0.9797	-0.02131	0.9995	0.01127	0.9919
ENSG00000078674	PCM1	pericentriolar material 1 [Source:HGNC Symbol;Acc:HGNC:8727]	protein_coding	-0.06989	0.9497	-0.04745	0.9995	-0.06641	0.9135
ENSG00000078687	TNRC6C	trinucleotide repeat containing adaptor 6C [Source:HGNC Symbol;Acc:HGNC:29318]	protein_coding	-0.09815	0.9378	-0.07753	0.9995	-0.08107	0.9135
ENSG00000078699	CBFA2T2	CBFA2/RUNX1 partner transcriptional co-repressor 2 [Source:HGNC Symbol;Acc:HGNC:1536]	protein_coding	-0.1177	0.9181	-0.1012	0.9995	-0.08605	0.9053
ENSG00000078725	BRINP1	BMP/retinoic acid inducible neural specific 1 [Source:HGNC Symbol;Acc:HGNC:2687]	protein_coding	0.2285	0.9685	0.2481	0.9995	-0.03074	0.9944
ENSG00000078747	ITCH	itchy E3 ubiquitin protein ligase [Source:HGNC Symbol;Acc:HGNC:13890]	protein_coding	-0.158	0.8965	-0.1368	0.9995	-0.1391	0.841
ENSG00000078795	PKD2L2	polycystin 2 like 2, transient receptor potential cation channel [Source:HGNC Symbol;Acc:HGNC:9012]	protein_coding	-0.4272	0.9023	-0.3996	0.9995	-0.2874	0.8898
ENSG00000078808	SDF4	stromal cell derived factor 4 [Source:HGNC Symbol;Acc:HGNC:24188]	protein_coding	0.2282	0.8744	0.244	0.9995	0.1637	0.8482
ENSG00000078814	MYH7B	myosin heavy chain 7B [Source:HGNC Symbol;Acc:HGNC:15906]	protein_coding	0.07235	0.9828	0.08734	0.9995	0.1991	0.8862
ENSG00000078900	TP73	tumor protein p73 [Source:HGNC Symbol;Acc:HGNC:12003]	protein_coding	0.171	0.939	0.1863	0.9995	0.3576	0.7843
ENSG00000078902	TOLLIP	toll interacting protein [Source:HGNC Symbol;Acc:HGNC:16476]	protein_coding	0.1766	0.8296	0.1905	0.9995	0.1814	0.7487
ENSG00000078967	UBE2D4	ubiquitin conjugating enzyme E2 D4 (putative) [Source:HGNC Symbol;Acc:HGNC:21647]	protein_coding	-0.2203	0.8458	-0.203	0.9995	-0.1851	0.7995
ENSG00000079102	RUNX1T1	RUNX1 partner transcriptional co-repressor 1 [Source:HGNC Symbol;Acc:HGNC:1535]	protein_coding	-0.4233	0.8803	-0.4026	0.9995	0.1232	0.9493
ENSG00000079134	THOC1	THO complex 1 [Source:HGNC Symbol;Acc:HGNC:19070]	protein_coding	-0.1209	0.9132	-0.09604	0.9995	-0.1282	0.838
ENSG00000079150	FKBP7	FKBP prolyl isomerase 7 [Source:HGNC Symbol;Acc:HGNC:3723]	protein_coding	-0.5334	0.6862	-0.515	0.9772	-0.4677	0.703
ENSG00000079156	OSBPL6	oxysterol binding protein like 6 [Source:HGNC Symbol;Acc:HGNC:16388]	protein_coding	-0.09135	0.9537	-0.0752	0.9995	-0.03146	0.9758
ENSG00000079215	SLC1A3	solute carrier family 1 member 3 [Source:HGNC Symbol;Acc:HGNC:10941]	protein_coding	-0.2929	0.8619	-0.2714	0.9995	-0.2714	0.7899
ENSG00000079246	XRCC5	X-ray repair cross complementing 5 [Source:HGNC Symbol;Acc:HGNC:12833]	protein_coding	-0.1031	0.9349	-0.08155	0.9995	-0.008712	0.9932
ENSG00000079263	SP140	SP140 nuclear body protein [Source:HGNC Symbol;Acc:HGNC:17133]	protein_coding	0.3375	0.6923	0.3582	0.9389	0.3276	0.6786
ENSG00000079277	MKNK1	MAPK interacting serine/threonine kinase 1 [Source:HGNC Symbol;Acc:HGNC:7110]	protein_coding	0.01673	0.9904	0.03458	0.9995	0.01981	0.979
ENSG00000079308	TNS1	tensin 1 [Source:HGNC Symbol;Acc:HGNC:11973]	protein_coding	-0.03827	0.9872	-0.02033	0.9996	-0.1501	0.8969
ENSG00000079313	REXO1	RNA exonuclease 1 homolog [Source:HGNC Symbol;Acc:HGNC:24616]	protein_coding	0.222	0.8759	0.2386	0.9995	0.2663	0.7411
ENSG00000079332	SAR1A	secretion associated Ras related GTPase 1A [Source:HGNC Symbol;Acc:HGNC:10534]	protein_coding	-0.03607	0.9797	-0.01426	0.9995	-0.006903	0.9936
ENSG00000079335	CDC14A	cell division cycle 14A [Source:HGNC Symbol;Acc:HGNC:1718]	protein_coding	-0.2908	0.8759	-0.2753	0.9995	-0.1617	0.8788
ENSG00000079337	RAPGEF3	Rap guanine nucleotide exchange factor 3 [Source:HGNC Symbol;Acc:HGNC:16629]	protein_coding	-0.2967	0.8151	-0.2819	0.9995	-0.1726	0.841
ENSG00000079385	CEACAM1	CEA cell adhesion molecule 1 [Source:HGNC Symbol;Acc:HGNC:1814]	protein_coding	0.2043	0.9528	0.2244	0.9995	0.7228	0.7699
ENSG00000079387	SENP1	SUMO specific peptidase 1 [Source:HGNC Symbol;Acc:HGNC:17927]	protein_coding	0.1009	0.9315	0.1222	0.9995	0.1218	0.8457
ENSG00000079432	CIC	capicua transcriptional repressor [Source:HGNC Symbol;Acc:HGNC:14214]	protein_coding	0.2323	0.8642	0.2483	0.9995	0.2323	0.7837
ENSG00000079435	LIPE	lipase E, hormone sensitive type [Source:HGNC Symbol;Acc:HGNC:6621]	protein_coding	-0.2155	0.8909	-0.1936	0.9995	-0.2069	0.8376
ENSG00000079459	FDFT1	farnesyl-diphosphate farnesyltransferase 1 [Source:HGNC Symbol;Acc:HGNC:3629]	protein_coding	-0.1979	0.8874	-0.1785	0.9995	-0.1478	0.861
ENSG00000079462	PAFAH1B3	platelet activating factor acetylhydrolase 1b catalytic subunit 3 [Source:HGNC Symbol;Acc:HGNC:8576]	protein_coding	0.1294	0.929	0.1499	0.9995	0.1636	0.8425
ENSG00000079482	OPHN1	oligophrenin 1 [Source:HGNC Symbol;Acc:HGNC:8148]	protein_coding	0.007801	0.9985	0.02603	0.9995	-0.01768	0.9916
ENSG00000079616	KIF22	kinesin family member 22 [Source:HGNC Symbol;Acc:HGNC:6391]	protein_coding	0.2461	0.6637	0.2647	0.9995	0.267	0.6766
ENSG00000079691	CARMIL1	capping protein regulator and myosin 1 linker 1 [Source:HGNC Symbol;Acc:HGNC:21581]	protein_coding	-0.08796	0.9628	-0.06708	0.9995	0.02878	0.9801
ENSG00000079739	PGM1	phosphoglucomutase 1 [Source:HGNC Symbol;Acc:HGNC:8905]	protein_coding	0.1784	0.9062	0.1959	0.9995	0.284	0.7411
ENSG00000079785	DDX1	DEAD-box helicase 1 [Source:HGNC Symbol;Acc:HGNC:2734]	protein_coding	-0.1273	0.9331	-0.1055	0.9995	-0.09457	0.9211
ENSG00000079805	DNM2	dynamin 2 [Source:HGNC Symbol;Acc:HGNC:2974]	protein_coding	0.2542	0.7655	0.2713	0.9995	0.2378	0.7373
ENSG00000079819	EPB41L2	erythrocyte membrane protein band 4.1 like 2 [Source:HGNC Symbol;Acc:HGNC:3379]	protein_coding	-0.4445	0.5693	-0.4261	0.9137	-0.4311	0.6104
ENSG00000079931	MOXD1	monooxygenase DBH like 1 [Source:HGNC Symbol;Acc:HGNC:21063]	protein_coding	-0.5031	0.06399	-0.476	0.4962	-0.5024	0.3708
ENSG00000079950	STX7	syntaxin 7 [Source:HGNC Symbol;Acc:HGNC:11442]	protein_coding	-0.06626	0.9585	-0.04585	0.9995	-0.04118	0.9548
ENSG00000079974	RABL2B	RAB, member of RAS oncogene family like 2B [Source:HGNC Symbol;Acc:HGNC:9800]	protein_coding	0.216	0.8679	0.2265	0.9995	0.3088	0.7032
ENSG00000079999	KEAP1	kelch like ECH associated protein 1 [Source:HGNC Symbol;Acc:HGNC:23177]	protein_coding	0.2278	0.7866	0.2433	0.9995	0.2415	0.7043
ENSG00000080031	PTPRH	protein tyrosine phosphatase receptor type H [Source:HGNC Symbol;Acc:HGNC:9672]	protein_coding	0.7778	0.8458	0.7865	0.9995	1.008	0.745
ENSG00000080166	DCT	dopachrome tautomerase [Source:HGNC Symbol;Acc:HGNC:2709]	protein_coding	0.4535	0.9606	0.4718	0.9995	-0.6964	0.8875
ENSG00000080189	SLC35C2	solute carrier family 35 member C2 [Source:HGNC Symbol;Acc:HGNC:17117]	protein_coding	0.02308	0.9843	0.03941	0.9995	0.03819	0.9548
ENSG00000080200	CRYBG3	crystallin beta-gamma domain containing 3 [Source:HGNC Symbol;Acc:HGNC:34427]	protein_coding	-0.4032	0.6487	-0.3839	0.9728	-0.367	0.6786
ENSG00000080298	RFX3	regulatory factor X3 [Source:HGNC Symbol;Acc:HGNC:9984]	protein_coding	0.2067	0.8532	0.2268	0.9995	0.2464	0.717
ENSG00000080345	RIF1	replication timing regulatory factor 1 [Source:HGNC Symbol;Acc:HGNC:23207]	protein_coding	-0.08228	0.9591	-0.05966	0.9995	-0.07532	0.9277
ENSG00000080371	RAB21	RAB21, member RAS oncogene family [Source:HGNC Symbol;Acc:HGNC:18263]	protein_coding	-0.02368	0.9852	-0.00699	0.9996	0.009898	0.9901
ENSG00000080503	SMARCA2	SWI/SNF related, matrix associated, actin dependent regulator of chromatin, subfamily a, member 2 [Source:HGNC Symbol;Acc:HGNC:11098]	protein_coding	-0.2653	0.7611	-0.2456	0.9995	-0.2781	0.703
ENSG00000080546	SESN1	sestrin 1 [Source:HGNC Symbol;Acc:HGNC:21595]	protein_coding	-0.2096	0.8874	-0.1901	0.9995	-0.1458	0.8603
ENSG00000080561	MID2	midline 2 [Source:HGNC Symbol;Acc:HGNC:7096]	protein_coding	-0.5198	0.434	-0.5055	0.9233	-0.4256	0.6592
ENSG00000080573	COL5A3	collagen type V alpha 3 chain [Source:HGNC Symbol;Acc:HGNC:14864]	protein_coding	0.05809	0.9869	0.07518	0.9995	0.02969	0.9881
ENSG00000080603	SRCAP	Snf2 related CREBBP activator protein [Source:HGNC Symbol;Acc:HGNC:16974]	protein_coding	0.1513	0.939	0.1502	0.9995	0.3255	0.7746
ENSG00000080608	PUM3	pumilio RNA binding family member 3 [Source:HGNC Symbol;Acc:HGNC:29676]	protein_coding	-0.09883	0.939	-0.07778	0.9995	-0.06567	0.9377
ENSG00000080618	CPB2	carboxypeptidase B2 [Source:HGNC Symbol;Acc:HGNC:2300]	protein_coding	0.1943	0.9765	0.1938	0.9995	0.1371	0.9693
ENSG00000080802	CNOT4	CCR4-NOT transcription complex subunit 4 [Source:HGNC Symbol;Acc:HGNC:7880]	protein_coding	-0.005398	0.9972	0.01652	0.9995	0.01172	0.9881
ENSG00000080815	PSEN1	presenilin 1 [Source:HGNC Symbol;Acc:HGNC:9508]	protein_coding	0.05136	0.9612	0.07229	0.9995	0.05441	0.928
ENSG00000080819	CPOX	coproporphyrinogen oxidase [Source:HGNC Symbol;Acc:HGNC:2321]	protein_coding	0.2102	0.8874	0.2265	0.9995	0.2358	0.7965
ENSG00000080822	CLDND1	claudin domain containing 1 [Source:HGNC Symbol;Acc:HGNC:1322]	protein_coding	-0.1206	0.9154	-0.09884	0.9995	-0.09489	0.8878
ENSG00000080823	MOK	MOK protein kinase [Source:HGNC Symbol;Acc:HGNC:9833]	protein_coding	0.2874	0.8994	0.3001	0.9995	0.5585	0.6971
ENSG00000080824	HSP90AA1	heat shock protein 90 alpha family class A member 1 [Source:HGNC Symbol;Acc:HGNC:5253]	protein_coding	-0.1946	0.9426	-0.1725	0.9995	0.09312	0.9616
ENSG00000080839	RBL1	RB transcriptional corepressor like 1 [Source:HGNC Symbol;Acc:HGNC:9893]	protein_coding	0.02754	0.9838	0.06002	0.9995	0.02841	0.9709
ENSG00000080845	DLGAP4	DLG associated protein 4 [Source:HGNC Symbol;Acc:HGNC:24476]	protein_coding	0.2232	0.8819	0.2392	0.9995	0.2397	0.7802
ENSG00000080854	IGSF9B	immunoglobulin superfamily member 9B [Source:HGNC Symbol;Acc:HGNC:32326]	protein_coding	0.1543	0.9606	0.1773	0.9995	-0.0215	0.9924
ENSG00000080986	NDC80	NDC80 kinetochore complex component [Source:HGNC Symbol;Acc:HGNC:16909]	protein_coding	0.1995	0.9217	0.2222	0.9995	0.2456	0.8339
ENSG00000081014	AP4E1	adaptor related protein complex 4 subunit epsilon 1 [Source:HGNC Symbol;Acc:HGNC:573]	protein_coding	0.06704	0.9606	0.08737	0.9995	0.09598	0.8842
ENSG00000081019	RSBN1	round spermatid basic protein 1 [Source:HGNC Symbol;Acc:HGNC:25642]	protein_coding	-0.007824	0.9962	0.01858	0.9995	-0.01735	0.9831
ENSG00000081026	MAGI3	membrane associated guanylate kinase, WW and PDZ domain containing 3 [Source:HGNC Symbol;Acc:HGNC:29647]	protein_coding	-0.2769	0.8532	-0.2598	0.9995	-0.1375	0.8736
ENSG00000081041	CXCL2	C-X-C motif chemokine ligand 2 [Source:HGNC Symbol;Acc:HGNC:4603]	protein_coding	0.5943	0.8966	0.6162	0.9995	0.821	0.717
ENSG00000081052	COL4A4	collagen type IV alpha 4 chain [Source:HGNC Symbol;Acc:HGNC:2206]	protein_coding	-1.073	0.3495	-1.054	0.3629	-1.208	0.5217
ENSG00000081059	TCF7	transcription factor 7 [Source:HGNC Symbol;Acc:HGNC:11639]	protein_coding	-0.1889	0.9315	-0.1732	0.9995	-0.2129	0.8749
ENSG00000081087	OSTM1	osteoclastogenesis associated transmembrane protein 1 [Source:HGNC Symbol;Acc:HGNC:21652]	protein_coding	0.02403	0.9894	0.04571	0.9995	0.01714	0.9842
ENSG00000081154	PCNP	PEST proteolytic signal containing nuclear protein [Source:HGNC Symbol;Acc:HGNC:30023]	protein_coding	-0.0651	0.9661	-0.04352	0.9995	-0.02846	0.9768
ENSG00000081177	EXD2	exonuclease 3'-5' domain containing 2 [Source:HGNC Symbol;Acc:HGNC:20217]	protein_coding	-0.2481	0.8012	-0.2343	0.9995	-0.1702	0.7988
ENSG00000081181	ARG2	arginase 2 [Source:HGNC Symbol;Acc:HGNC:664]	protein_coding	-0.1723	0.9392	-0.1498	0.9995	-0.08299	0.9604
ENSG00000081189	MEF2C	myocyte enhancer factor 2C [Source:HGNC Symbol;Acc:HGNC:6996]	protein_coding	-0.4265	0.7063	-0.4051	0.9753	-0.3844	0.703
ENSG00000081237	PTPRC	protein tyrosine phosphatase receptor type C [Source:HGNC Symbol;Acc:HGNC:9666]	protein_coding	-0.09002	0.9537	-0.06844	0.9995	0.07205	0.9352
ENSG00000081277	PKP1	plakophilin 1 [Source:HGNC Symbol;Acc:HGNC:9023]	protein_coding	0.03056	0.9904	0.0483	0.9995	0.03832	0.9814
ENSG00000081320	STK17B	serine/threonine kinase 17b [Source:HGNC Symbol;Acc:HGNC:11396]	protein_coding	-0.06706	0.9671	-0.04499	0.9995	-0.04154	0.9644
ENSG00000081377	CDC14B	cell division cycle 14B [Source:HGNC Symbol;Acc:HGNC:1719]	protein_coding	-0.6776	0.4054	-0.6586	0.6593	-0.5005	0.6322
ENSG00000081386	ZNF510	zinc finger protein 510 [Source:HGNC Symbol;Acc:HGNC:29161]	protein_coding	-0.2228	0.8329	-0.1928	0.9995	-0.2415	0.7202
ENSG00000081665	ZNF506	zinc finger protein 506 [Source:HGNC Symbol;Acc:HGNC:23780]	protein_coding	-0.3397	0.7018	-0.3137	0.9995	-0.4201	0.5755
ENSG00000081721	DUSP12	dual specificity phosphatase 12 [Source:HGNC Symbol;Acc:HGNC:3067]	protein_coding	-0.1778	0.8512	-0.1533	0.9995	-0.155	0.7899
ENSG00000081760	AACS	acetoacetyl-CoA synthetase [Source:HGNC Symbol;Acc:HGNC:21298]	protein_coding	-0.1618	0.9349	-0.1427	0.9995	-0.06252	0.9603
ENSG00000081791	DELE1	DAP3 binding cell death enhancer 1 [Source:HGNC Symbol;Acc:HGNC:28969]	protein_coding	-0.08462	0.9132	-0.06588	0.9995	-0.07304	0.8837
ENSG00000081803	CADPS2	calcium dependent secretion activator 2 [Source:HGNC Symbol;Acc:HGNC:16018]	protein_coding	-0.6503	0.5917	-0.6299	0.7939	-0.5507	0.6783
ENSG00000081870	HSPB11	heat shock protein family B (small) member 11 [Source:HGNC Symbol;Acc:HGNC:25019]	protein_coding	0.1046	0.9537	0.1262	0.9995	0.09402	0.9235
ENSG00000081913	PHLPP1	PH domain and leucine rich repeat protein phosphatase 1 [Source:HGNC Symbol;Acc:HGNC:20610]	protein_coding	-0.1215	0.9338	-0.1083	0.9995	-0.01601	0.9876
ENSG00000081923	ATP8B1	ATPase phospholipid transporting 8B1 [Source:HGNC Symbol;Acc:HGNC:3706]	protein_coding	-0.369	0.675	-0.3485	0.9995	-0.3791	0.6681
ENSG00000081985	IL12RB2	interleukin 12 receptor subunit beta 2 [Source:HGNC Symbol;Acc:HGNC:5972]	protein_coding	0.3517	0.7525	0.3737	0.9866	0.3487	0.6879
ENSG00000082014	SMARCD3	SWI/SNF related, matrix associated, actin dependent regulator of chromatin, subfamily d, member 3 [Source:HGNC Symbol;Acc:HGNC:11108]	protein_coding	-0.02602	0.9905	-0.007478	0.9996	-0.07675	0.9529
ENSG00000082068	WDR70	WD repeat domain 70 [Source:HGNC Symbol;Acc:HGNC:25495]	protein_coding	-0.1976	0.7836	-0.1737	0.9995	-0.1853	0.7311
ENSG00000082074	FYB1	FYN binding protein 1 [Source:HGNC Symbol;Acc:HGNC:4036]	protein_coding	-0.2069	0.8619	-0.1853	0.9995	-0.2099	0.76
ENSG00000082146	STRADB	STE20 related adaptor beta [Source:HGNC Symbol;Acc:HGNC:13205]	protein_coding	-0.2901	0.8151	-0.2464	0.9995	-0.3691	0.6786
ENSG00000082153	BZW1	basic leucine zipper and W2 domains 1 [Source:HGNC Symbol;Acc:HGNC:18380]	protein_coding	-0.1478	0.9244	-0.1251	0.9995	-0.08191	0.936
ENSG00000082175	PGR	progesterone receptor [Source:HGNC Symbol;Acc:HGNC:8910]	protein_coding	-0.2146	0.9606	-0.1869	0.9995	-0.06532	0.979
ENSG00000082212	ME2	malic enzyme 2 [Source:HGNC Symbol;Acc:HGNC:6984]	protein_coding	0.1457	0.8874	0.168	0.9995	0.1525	0.7953
ENSG00000082213	C5orf22	chromosome 5 open reading frame 22 [Source:HGNC Symbol;Acc:HGNC:25639]	protein_coding	0.01926	0.9893	0.03973	0.9995	0.04989	0.9393
ENSG00000082258	CCNT2	cyclin T2 [Source:HGNC Symbol;Acc:HGNC:1600]	protein_coding	-0.2391	0.7485	-0.2164	0.9995	-0.2306	0.6993
ENSG00000082269	FAM135A	family with sequence similarity 135 member A [Source:HGNC Symbol;Acc:HGNC:21084]	protein_coding	-0.2003	0.9019	-0.1775	0.9995	-0.24	0.8059
ENSG00000082293	COL19A1	collagen type XIX alpha 1 chain [Source:HGNC Symbol;Acc:HGNC:2196]	protein_coding	-0.3498	0.9315	-0.3262	0.9995	-0.4235	0.841
ENSG00000082397	EPB41L3	erythrocyte membrane protein band 4.1 like 3 [Source:HGNC Symbol;Acc:HGNC:3380]	protein_coding	0.1525	0.8965	0.1699	0.9995	0.1507	0.8272
ENSG00000082438	COBLL1	cordon-bleu WH2 repeat protein like 1 [Source:HGNC Symbol;Acc:HGNC:23571]	protein_coding	-0.7519	0.5058	-0.7301	0.6564	-0.697	0.5995
ENSG00000082458	DLG3	discs large MAGUK scaffold protein 3 [Source:HGNC Symbol;Acc:HGNC:2902]	protein_coding	-0.04973	0.9762	-0.02985	0.9995	-0.03903	0.9649
ENSG00000082482	KCNK2	potassium two pore domain channel subfamily K member 2 [Source:HGNC Symbol;Acc:HGNC:6277]	protein_coding	-1.028	0.7859	-1.009	0.9934	-1.187	0.6786
ENSG00000082497	SERTAD4	SERTA domain containing 4 [Source:HGNC Symbol;Acc:HGNC:25236]	protein_coding	-0.8957	0.4253	-0.8728	0.6607	-0.9953	0.5223
ENSG00000082512	TRAF5	TNF receptor associated factor 5 [Source:HGNC Symbol;Acc:HGNC:12035]	protein_coding	0.1317	0.8966	0.1542	0.9995	0.1383	0.822
ENSG00000082515	MRPL22	mitochondrial ribosomal protein L22 [Source:HGNC Symbol;Acc:HGNC:14480]	protein_coding	-0.004121	0.9992	0.01723	0.9995	0.005707	0.9946
ENSG00000082516	GEMIN5	gem nuclear organelle associated protein 5 [Source:HGNC Symbol;Acc:HGNC:20043]	protein_coding	-0.01426	0.9929	0.003644	0.9996	0.01642	0.9831
ENSG00000082641	NFE2L1	nuclear factor, erythroid 2 like 1 [Source:HGNC Symbol;Acc:HGNC:7781]	protein_coding	0.1103	0.9461	0.1261	0.9995	0.03056	0.977
ENSG00000082684	SEMA5B	semaphorin 5B [Source:HGNC Symbol;Acc:HGNC:10737]	protein_coding	-1.446	0.4095	-1.418	0.5858	-1.2	0.6287
ENSG00000082701	GSK3B	glycogen synthase kinase 3 beta [Source:HGNC Symbol;Acc:HGNC:4617]	protein_coding	0.0201	0.9872	0.03721	0.9995	0.01882	0.977
ENSG00000082781	ITGB5	integrin subunit beta 5 [Source:HGNC Symbol;Acc:HGNC:6160]	protein_coding	-0.9272	0.03564	-0.9115	0.08079	-0.8857	0.4935
ENSG00000082805	ERC1	ELKS/RAB6-interacting/CAST family member 1 [Source:HGNC Symbol;Acc:HGNC:17072]	protein_coding	-0.1657	0.9172	-0.1492	0.9995	-0.1399	0.8766
ENSG00000082898	XPO1	exportin 1 [Source:HGNC Symbol;Acc:HGNC:12825]	protein_coding	-0.004646	0.9982	0.01694	0.9995	0.004463	0.9948
ENSG00000083067	TRPM3	transient receptor potential cation channel subfamily M member 3 [Source:HGNC Symbol;Acc:HGNC:17992]	protein_coding	-0.2402	0.9466	-0.221	0.9995	-0.1191	0.9474
ENSG00000083093	PALB2	partner and localizer of BRCA2 [Source:HGNC Symbol;Acc:HGNC:26144]	protein_coding	-0.04127	0.9765	-0.0208	0.9995	-0.02635	0.9737
ENSG00000083097	DOP1A	DOP1 leucine zipper like protein A [Source:HGNC Symbol;Acc:HGNC:21194]	protein_coding	-0.3821	0.7569	-0.3584	0.9995	-0.3448	0.7108
ENSG00000083099	LYRM2	LYR motif containing 2 [Source:HGNC Symbol;Acc:HGNC:25229]	protein_coding	-0.133	0.9341	-0.1109	0.9995	-0.1417	0.8732
ENSG00000083123	BCKDHB	branched chain keto acid dehydrogenase E1 subunit beta [Source:HGNC Symbol;Acc:HGNC:987]	protein_coding	-0.6117	0.6289	-0.5909	0.9255	-0.4461	0.7046
ENSG00000083168	KAT6A	lysine acetyltransferase 6A [Source:HGNC Symbol;Acc:HGNC:13013]	protein_coding	-0.05135	0.9657	-0.03384	0.9995	-0.05319	0.9392
ENSG00000083223	TUT7	terminal uridylyl transferase 7 [Source:HGNC Symbol;Acc:HGNC:25817]	protein_coding	-0.1239	0.9214	-0.102	0.9995	-0.0996	0.9003
ENSG00000083290	ULK2	unc-51 like autophagy activating kinase 2 [Source:HGNC Symbol;Acc:HGNC:13480]	protein_coding	-0.3173	0.6455	-0.3079	0.9995	-0.2243	0.7314
ENSG00000083307	GRHL2	grainyhead like transcription factor 2 [Source:HGNC Symbol;Acc:HGNC:2799]	protein_coding	-0.2345	0.8899	-0.2137	0.9995	-0.2438	0.8272
ENSG00000083312	TNPO1	transportin 1 [Source:HGNC Symbol;Acc:HGNC:6401]	protein_coding	-0.08092	0.9612	-0.05908	0.9995	-0.05106	0.9581
ENSG00000083444	PLOD1	procollagen-lysine,2-oxoglutarate 5-dioxygenase 1 [Source:HGNC Symbol;Acc:HGNC:9081]	protein_coding	0.1442	0.9349	0.1603	0.9995	0.1061	0.9272
ENSG00000083457	ITGAE	integrin subunit alpha E [Source:HGNC Symbol;Acc:HGNC:6147]	protein_coding	0.2519	0.8948	0.2704	0.9995	0.23	0.8376
ENSG00000083520	DIS3	DIS3 homolog, exosome endoribonuclease and 3'-5' exoribonuclease [Source:HGNC Symbol;Acc:HGNC:20604]	protein_coding	-0.2742	0.8355	-0.252	0.9995	-0.2577	0.7562
ENSG00000083535	PIBF1	progesterone immunomodulatory binding factor 1 [Source:HGNC Symbol;Acc:HGNC:23352]	protein_coding	-0.3534	0.8133	-0.3297	0.9995	-0.3104	0.751
ENSG00000083544	TDRD3	tudor domain containing 3 [Source:HGNC Symbol;Acc:HGNC:20612]	protein_coding	-0.3881	0.7416	-0.3639	0.9995	-0.384	0.6857
ENSG00000083635	NUFIP1	nuclear FMR1 interacting protein 1 [Source:HGNC Symbol;Acc:HGNC:8057]	protein_coding	0.01444	0.9947	0.05827	0.9995	-0.02479	0.9807
ENSG00000083642	PDS5B	PDS5 cohesin associated factor B [Source:HGNC Symbol;Acc:HGNC:20418]	protein_coding	-0.05103	0.9693	-0.02916	0.9995	-0.03512	0.9604
ENSG00000083720	OXCT1	3-oxoacid CoA-transferase 1 [Source:HGNC Symbol;Acc:HGNC:8527]	protein_coding	-0.2093	0.8874	-0.1871	0.9995	-0.1888	0.8247
ENSG00000083750	RRAGB	Ras related GTP binding B [Source:HGNC Symbol;Acc:HGNC:19901]	protein_coding	-0.3076	0.7358	-0.2818	0.9995	-0.2966	0.6972
ENSG00000083799	CYLD	CYLD lysine 63 deubiquitinase [Source:HGNC Symbol;Acc:HGNC:2584]	protein_coding	0.02791	0.9805	0.05007	0.9995	0.05619	0.9223
ENSG00000083807	SLC27A5	solute carrier family 27 member 5 [Source:HGNC Symbol;Acc:HGNC:10999]	protein_coding	0.09521	0.967	0.1256	0.9995	0.026	0.9854
ENSG00000083812	ZNF324	zinc finger protein 324 [Source:HGNC Symbol;Acc:HGNC:14096]	protein_coding	0.1769	0.8965	0.1915	0.9995	0.2375	0.7748
ENSG00000083817	ZNF416	zinc finger protein 416 [Source:HGNC Symbol;Acc:HGNC:20645]	protein_coding	-0.1964	0.8636	-0.1834	0.9995	-0.1551	0.8272
ENSG00000083828	ZNF586	zinc finger protein 586 [Source:HGNC Symbol;Acc:HGNC:25949]	protein_coding	-0.1375	0.9214	-0.1126	0.9995	-0.1988	0.7964
ENSG00000083838	ZNF446	zinc finger protein 446 [Source:HGNC Symbol;Acc:HGNC:21036]	protein_coding	0.4368	0.7531	0.4446	0.9995	0.5122	0.6783
ENSG00000083844	ZNF264	zinc finger protein 264 [Source:HGNC Symbol;Acc:HGNC:13057]	protein_coding	-0.09793	0.9083	-0.07957	0.9995	-0.07755	0.88
ENSG00000083845	RPS5	ribosomal protein S5 [Source:HGNC Symbol;Acc:HGNC:10426]	protein_coding	-0.2943	0.8499	-0.2748	0.9995	-0.0441	0.964
ENSG00000083857	FAT1	FAT atypical cadherin 1 [Source:HGNC Symbol;Acc:HGNC:3595]	protein_coding	-0.1861	0.9508	-0.1705	0.9995	-0.1684	0.9305
ENSG00000083896	YTHDC1	YTH domain containing 1 [Source:HGNC Symbol;Acc:HGNC:30626]	protein_coding	-0.05445	0.9638	-0.03463	0.9995	-0.04454	0.9519
ENSG00000083937	CHMP2B	charged multivesicular body protein 2B [Source:HGNC Symbol;Acc:HGNC:24537]	protein_coding	0.01216	0.9953	0.03453	0.9995	0.06296	0.9504
ENSG00000084070	SMAP2	small ArfGAP2 [Source:HGNC Symbol;Acc:HGNC:25082]	protein_coding	-0.04902	0.9764	-0.02995	0.9995	-0.07663	0.9211
ENSG00000084072	PPIE	peptidylprolyl isomerase E [Source:HGNC Symbol;Acc:HGNC:9258]	protein_coding	-0.0947	0.939	-0.07269	0.9995	-0.08386	0.9103
ENSG00000084073	ZMPSTE24	zinc metallopeptidase STE24 [Source:HGNC Symbol;Acc:HGNC:12877]	protein_coding	-0.1027	0.9344	-0.08071	0.9995	-0.09704	0.8875
ENSG00000084090	STARD7	StAR related lipid transfer domain containing 7 [Source:HGNC Symbol;Acc:HGNC:18063]	protein_coding	-0.08246	0.9297	-0.06345	0.9995	-0.09445	0.87
ENSG00000084092	NOA1	nitric oxide associated 1 [Source:HGNC Symbol;Acc:HGNC:28473]	protein_coding	-0.2481	0.8035	-0.2307	0.9995	-0.2023	0.7733
ENSG00000084093	REST	RE1 silencing transcription factor [Source:HGNC Symbol;Acc:HGNC:9966]	protein_coding	0.01687	0.9904	0.03815	0.9995	0.03946	0.9548
ENSG00000084110	HAL	histidine ammonia-lyase [Source:HGNC Symbol;Acc:HGNC:4806]	protein_coding	-0.2864	0.9524	-0.2645	0.9995	-0.5995	0.8181
ENSG00000084112	SSH1	slingshot protein phosphatase 1 [Source:HGNC Symbol;Acc:HGNC:30579]	protein_coding	0.2514	0.8538	0.2683	0.9995	0.2539	0.7643
ENSG00000084207	GSTP1	glutathione S-transferase pi 1 [Source:HGNC Symbol;Acc:HGNC:4638]	protein_coding	0.08322	0.9612	0.09807	0.9995	0.184	0.8528
ENSG00000084234	APLP2	amyloid beta precursor like protein 2 [Source:HGNC Symbol;Acc:HGNC:598]	protein_coding	0.0653	0.97	0.08147	0.9995	-0.002854	0.9977
ENSG00000084444	FAM234B	family with sequence similarity 234 member B [Source:HGNC Symbol;Acc:HGNC:29288]	protein_coding	0.1773	0.9322	0.1974	0.9995	0.2074	0.8452
ENSG00000084463	WBP11	WW domain binding protein 11 [Source:HGNC Symbol;Acc:HGNC:16461]	protein_coding	-0.002675	0.9992	0.01391	0.9996	0.01844	0.9804
ENSG00000084623	EIF3I	eukaryotic translation initiation factor 3 subunit I [Source:HGNC Symbol;Acc:HGNC:3272]	protein_coding	-0.009262	0.9929	0.01086	0.9996	0.01891	0.9776
ENSG00000084636	COL16A1	collagen type XVI alpha 1 chain [Source:HGNC Symbol;Acc:HGNC:2193]	protein_coding	-0.235	0.9021	-0.2199	0.9995	-0.3125	0.7936
ENSG00000084652	TXLNA	taxilin alpha [Source:HGNC Symbol;Acc:HGNC:30685]	protein_coding	0.2286	0.6477	0.2447	0.9995	0.2081	0.7154
ENSG00000084676	NCOA1	nuclear receptor coactivator 1 [Source:HGNC Symbol;Acc:HGNC:7668]	protein_coding	-0.04397	0.977	-0.02547	0.9995	-0.02789	0.9752
ENSG00000084693	AGBL5	ATP/GTP binding protein like 5 [Source:HGNC Symbol;Acc:HGNC:26147]	protein_coding	-0.1257	0.9036	-0.1029	0.9995	-0.1156	0.8489
ENSG00000084710	EFR3B	EFR3 homolog B [Source:HGNC Symbol;Acc:HGNC:29155]	protein_coding	-0.008849	0.9985	0.01205	0.9996	0.06055	0.9709
ENSG00000084731	KIF3C	kinesin family member 3C [Source:HGNC Symbol;Acc:HGNC:6321]	protein_coding	0.2458	0.905	0.2579	0.9995	0.4077	0.7251
ENSG00000084733	RAB10	RAB10, member RAS oncogene family [Source:HGNC Symbol;Acc:HGNC:9759]	protein_coding	0.005802	0.9978	0.02643	0.9995	0.04572	0.9546
ENSG00000084754	HADHA	hydroxyacyl-CoA dehydrogenase trifunctional multienzyme complex subunit alpha [Source:HGNC Symbol;Acc:HGNC:4801]	protein_coding	-0.006321	0.9947	0.01332	0.9996	0.03868	0.9462
ENSG00000084764	MAPRE3	microtubule associated protein RP/EB family member 3 [Source:HGNC Symbol;Acc:HGNC:6892]	protein_coding	-0.1016	0.9438	-0.09228	0.9995	-0.006845	0.9941
ENSG00000084774	CAD	carbamoyl-phosphate synthetase 2, aspartate transcarbamylase, and dihydroorotase [Source:HGNC Symbol;Acc:HGNC:1424]	protein_coding	0.04201	0.9811	0.05697	0.9995	0.09864	0.9135
ENSG00000085063	CD59	CD59 molecule (CD59 blood group) [Source:HGNC Symbol;Acc:HGNC:1689]	protein_coding	-0.235	0.9524	-0.2234	0.9995	-0.5928	0.8303
ENSG00000085117	CD82	CD82 molecule [Source:HGNC Symbol;Acc:HGNC:6210]	protein_coding	0.1481	0.9461	0.1651	0.9995	0.1594	0.9053
ENSG00000085185	BCORL1	BCL6 corepressor like 1 [Source:HGNC Symbol;Acc:HGNC:25657]	protein_coding	0.275	0.8815	0.2857	0.9995	0.4364	0.6786
ENSG00000085224	ATRX	ATRX chromatin remodeler [Source:HGNC Symbol;Acc:HGNC:886]	protein_coding	-0.3072	0.8128	-0.2861	0.9995	-0.2886	0.7445
ENSG00000085231	AK6	adenylate kinase 6 [Source:HGNC Symbol;Acc:HGNC:49151]	protein_coding	0.1318	0.9509	0.1548	0.9995	0.1611	0.8844
ENSG00000085265	FCN1	ficolin 1 [Source:HGNC Symbol;Acc:HGNC:3623]	protein_coding	0.3666	0.8159	0.3883	0.9995	0.3339	0.7648
ENSG00000085274	MYNN	myoneurin [Source:HGNC Symbol;Acc:HGNC:14955]	protein_coding	-0.11	0.9605	-0.08828	0.9995	-0.1678	0.8723
ENSG00000085276	MECOM	MDS1 and EVI1 complex locus [Source:HGNC Symbol;Acc:HGNC:3498]	protein_coding	-0.3279	0.6465	-0.3057	0.9995	-0.3186	0.6681
ENSG00000085365	SCAMP1	secretory carrier membrane protein 1 [Source:HGNC Symbol;Acc:HGNC:10563]	protein_coding	-0.2734	0.8041	-0.2517	0.9995	-0.2248	0.7648
ENSG00000085377	PREP	prolyl endopeptidase [Source:HGNC Symbol;Acc:HGNC:9358]	protein_coding	0.05346	0.9553	0.0691	0.9995	0.06379	0.901
ENSG00000085382	HACE1	HECT domain and ankyrin repeat containing E3 ubiquitin protein ligase 1 [Source:HGNC Symbol;Acc:HGNC:21033]	protein_coding	-0.07433	0.9606	-0.05518	0.9995	-0.01394	0.9881
ENSG00000085415	SEH1L	SEH1 like nucleoporin [Source:HGNC Symbol;Acc:HGNC:30379]	protein_coding	-0.1023	0.9322	-0.07843	0.9995	-0.09842	0.8836
ENSG00000085433	WDR47	WD repeat domain 47 [Source:HGNC Symbol;Acc:HGNC:29141]	protein_coding	-0.3624	0.7886	-0.3444	0.9995	-0.4482	0.6786
ENSG00000085465	OVGP1	oviductal glycoprotein 1 [Source:HGNC Symbol;Acc:HGNC:8524]	protein_coding	0.02074	0.9929	0.03709	0.9995	0.1083	0.9135
ENSG00000085491	SLC25A24	solute carrier family 25 member 24 [Source:HGNC Symbol;Acc:HGNC:20662]	protein_coding	0.004139	0.9992	0.02516	0.9995	0.001125	0.9992
ENSG00000085511	MAP3K4	mitogen-activated protein kinase kinase kinase 4 [Source:HGNC Symbol;Acc:HGNC:6856]	protein_coding	-0.04344	0.9612	-0.02968	0.9995	-0.03108	0.957
ENSG00000085514	PILRA	paired immunoglobin like type 2 receptor alpha [Source:HGNC Symbol;Acc:HGNC:20396]	protein_coding	0.2413	0.9096	0.2582	0.9995	0.2848	0.8325
ENSG00000085552	IGSF9	immunoglobulin superfamily member 9 [Source:HGNC Symbol;Acc:HGNC:18132]	protein_coding	0.1441	0.9559	0.1613	0.9995	0.1349	0.9223
ENSG00000085563	ABCB1	ATP binding cassette subfamily B member 1 [Source:HGNC Symbol;Acc:HGNC:40]	protein_coding	0.193	0.8965	0.2186	0.9995	0.1077	0.9053
ENSG00000085644	ZNF213	zinc finger protein 213 [Source:HGNC Symbol;Acc:HGNC:13005]	protein_coding	-0.08532	0.9612	-0.06942	0.9995	-0.0002679	0.9994
ENSG00000085662	AKR1B1	aldo-keto reductase family 1 member B [Source:HGNC Symbol;Acc:HGNC:381]	protein_coding	-0.028	0.9838	-0.009806	0.9996	-0.003855	0.9954
ENSG00000085719	CPNE3	copine 3 [Source:HGNC Symbol;Acc:HGNC:2316]	protein_coding	-0.2481	0.8872	-0.2286	0.9995	-0.2416	0.7964
ENSG00000085733	CTTN	cortactin [Source:HGNC Symbol;Acc:HGNC:3338]	protein_coding	0.03047	0.9893	0.04541	0.9995	-0.03297	0.9791
ENSG00000085741	WNT11	Wnt family member 11 [Source:HGNC Symbol;Acc:HGNC:12776]	protein_coding	0.2299	0.9524	0.2523	0.9995	0.7228	0.7262
ENSG00000085760	MTIF2	mitochondrial translational initiation factor 2 [Source:HGNC Symbol;Acc:HGNC:7441]	protein_coding	-0.06719	0.963	-0.0458	0.9995	-0.0595	0.9434
ENSG00000085788	DDHD2	DDHD domain containing 2 [Source:HGNC Symbol;Acc:HGNC:29106]	protein_coding	-0.009465	0.9949	0.01122	0.9996	0.003744	0.9952
ENSG00000085831	TTC39A	tetratricopeptide repeat domain 39A [Source:HGNC Symbol;Acc:HGNC:18657]	protein_coding	0.2318	0.8874	0.2519	0.9995	0.2307	0.8325
ENSG00000085832	EPS15	epidermal growth factor receptor pathway substrate 15 [Source:HGNC Symbol;Acc:HGNC:3419]	protein_coding	-0.1186	0.9199	-0.09628	0.9995	-0.09595	0.8929
ENSG00000085840	ORC1	origin recognition complex subunit 1 [Source:HGNC Symbol;Acc:HGNC:8487]	protein_coding	0.2072	0.9089	0.2209	0.9995	0.3835	0.7218
ENSG00000085871	MGST2	microsomal glutathione S-transferase 2 [Source:HGNC Symbol;Acc:HGNC:7063]	protein_coding	-0.121	0.9297	-0.101	0.9995	-0.1186	0.8757
ENSG00000085978	ATG16L1	autophagy related 16 like 1 [Source:HGNC Symbol;Acc:HGNC:21498]	protein_coding	0.01239	0.9905	0.03791	0.9995	0.0267	0.9673
ENSG00000085982	USP40	ubiquitin specific peptidase 40 [Source:HGNC Symbol;Acc:HGNC:20069]	protein_coding	-0.07083	0.9412	-0.05595	0.9995	-0.05275	0.9339
ENSG00000085998	POMGNT1	protein O-linked mannose N-acetylglucosaminyltransferase 1 (beta 1,2-) [Source:HGNC Symbol;Acc:HGNC:19139]	protein_coding	0.08577	0.9517	0.1023	0.9995	0.08421	0.9153
ENSG00000085999	RAD54L	RAD54 like [Source:HGNC Symbol;Acc:HGNC:9826]	protein_coding	0.5559	0.8025	0.5764	0.9995	0.5699	0.6997
ENSG00000086015	MAST2	microtubule associated serine/threonine kinase 2 [Source:HGNC Symbol;Acc:HGNC:19035]	protein_coding	-0.07121	0.9726	-0.05542	0.9995	0.01825	0.9891
ENSG00000086061	DNAJA1	DnaJ heat shock protein family (Hsp40) member A1 [Source:HGNC Symbol;Acc:HGNC:5229]	protein_coding	0.2706	0.8818	0.2908	0.9995	0.3617	0.7411
ENSG00000086062	B4GALT1	beta-1,4-galactosyltransferase 1 [Source:HGNC Symbol;Acc:HGNC:924]	protein_coding	0.2388	0.8678	0.2555	0.9995	0.2273	0.7899
ENSG00000086065	CHMP5	charged multivesicular body protein 5 [Source:HGNC Symbol;Acc:HGNC:26942]	protein_coding	0.06327	0.9747	0.08469	0.9995	0.121	0.9015
ENSG00000086102	NFX1	nuclear transcription factor, X-box binding 1 [Source:HGNC Symbol;Acc:HGNC:7803]	protein_coding	-0.1963	0.8497	-0.1767	0.9995	-0.1842	0.78
ENSG00000086200	IPO11	importin 11 [Source:HGNC Symbol;Acc:HGNC:20628]	protein_coding	-0.1496	0.9204	-0.1251	0.9995	-0.2512	0.7576
ENSG00000086205	FOLH1	folate hydrolase 1 [Source:HGNC Symbol;Acc:HGNC:3788]	protein_coding	-0.3791	0.9208	-0.3604	0.9995	-0.6121	0.793
ENSG00000086232	EIF2AK1	eukaryotic translation initiation factor 2 alpha kinase 1 [Source:HGNC Symbol;Acc:HGNC:24921]	protein_coding	-0.006325	0.9965	0.01097	0.9996	-0.02552	0.9768
ENSG00000086289	EPDR1	ependymin related 1 [Source:HGNC Symbol;Acc:HGNC:17572]	protein_coding	0.6928	0.8838	0.7196	0.9995	1.365	0.6307
ENSG00000086300	SNX10	sorting nexin 10 [Source:HGNC Symbol;Acc:HGNC:14974]	protein_coding	-0.0937	0.9787	-0.06644	0.9995	0.07166	0.9766
ENSG00000086475	SEPHS1	selenophosphate synthetase 1 [Source:HGNC Symbol;Acc:HGNC:19685]	protein_coding	0.2119	0.8874	0.231	0.9995	0.1558	0.8478
ENSG00000086504	MRPL28	mitochondrial ribosomal protein L28 [Source:HGNC Symbol;Acc:HGNC:14484]	protein_coding	0.4947	0.4151	0.5107	0.6273	0.5165	0.5413
ENSG00000086544	ITPKC	inositol-trisphosphate 3-kinase C [Source:HGNC Symbol;Acc:HGNC:14897]	protein_coding	0.03117	0.9904	0.04905	0.9995	0.1008	0.9371
ENSG00000086548	CEACAM6	CEA cell adhesion molecule 6 [Source:HGNC Symbol;Acc:HGNC:1818]	protein_coding	-0.08718	0.9837	-0.0641	0.9995	0.4843	0.8562
ENSG00000086570	FAT2	FAT atypical cadherin 2 [Source:HGNC Symbol;Acc:HGNC:3596]	protein_coding	0.02218	0.9929	0.0393	0.9995	0.002631	0.998
ENSG00000086589	RBM22	RNA binding motif protein 22 [Source:HGNC Symbol;Acc:HGNC:25503]	protein_coding	0.1245	0.8261	0.1369	0.9995	0.1304	0.7718
ENSG00000086598	TMED2	transmembrane p24 trafficking protein 2 [Source:HGNC Symbol;Acc:HGNC:16996]	protein_coding	-0.1187	0.9246	-0.09824	0.9995	-0.07635	0.9305
ENSG00000086619	ERO1B	endoplasmic reticulum oxidoreductase 1 beta [Source:HGNC Symbol;Acc:HGNC:14355]	protein_coding	-0.1243	0.9606	-0.1037	0.9995	-0.01879	0.9904
ENSG00000086666	ZFAND6	zinc finger AN1-type containing 6 [Source:HGNC Symbol;Acc:HGNC:30164]	protein_coding	-0.2486	0.8639	-0.2264	0.9995	-0.2086	0.814
ENSG00000086696	HSD17B2	hydroxysteroid 17-beta dehydrogenase 2 [Source:HGNC Symbol;Acc:HGNC:5211]	protein_coding	-0.5853	0.8874	-0.5603	0.9995	-0.1748	0.9423
ENSG00000086712	TXLNG	taxilin gamma [Source:HGNC Symbol;Acc:HGNC:18578]	protein_coding	0.06085	0.9812	0.07972	0.9995	0.03864	0.9791
ENSG00000086730	LAT2	linker for activation of T cells family member 2 [Source:HGNC Symbol;Acc:HGNC:12749]	protein_coding	0.3028	0.7572	0.3204	0.9995	0.3466	0.6786
ENSG00000086758	HUWE1	HECT, UBA and WWE domain containing E3 ubiquitin protein ligase 1 [Source:HGNC Symbol;Acc:HGNC:30892]	protein_coding	0.09941	0.9453	0.117	0.9995	0.06752	0.9397
ENSG00000086827	ZW10	zw10 kinetochore protein [Source:HGNC Symbol;Acc:HGNC:13194]	protein_coding	-0.1185	0.9385	-0.0967	0.9995	-0.1468	0.8619
ENSG00000086848	ALG9	ALG9 alpha-1,2-mannosyltransferase [Source:HGNC Symbol;Acc:HGNC:15672]	protein_coding	-0.1495	0.9331	-0.1304	0.9995	0.01301	0.9924
ENSG00000086967	MYBPC2	myosin binding protein C, fast type [Source:HGNC Symbol;Acc:HGNC:7550]	protein_coding	1.197	0.6376	1.181	0.9213	1.064	0.6786
ENSG00000086991	NOX4	NADPH oxidase 4 [Source:HGNC Symbol;Acc:HGNC:7891]	protein_coding	-0.3184	0.9089	-0.2916	0.9995	0.3625	0.841
ENSG00000087008	ACOX3	acyl-CoA oxidase 3, pristanoyl [Source:HGNC Symbol;Acc:HGNC:121]	protein_coding	0.1604	0.8831	0.1733	0.9995	0.1991	0.745
ENSG00000087053	MTMR2	myotubularin related protein 2 [Source:HGNC Symbol;Acc:HGNC:7450]	protein_coding	-0.05582	0.9612	-0.03567	0.9995	-0.04453	0.9422
ENSG00000087074	PPP1R15A	protein phosphatase 1 regulatory subunit 15A [Source:HGNC Symbol;Acc:HGNC:14375]	protein_coding	0.4349	0.8874	0.4541	0.9995	0.537	0.7739
ENSG00000087076	HSD17B14	hydroxysteroid 17-beta dehydrogenase 14 [Source:HGNC Symbol;Acc:HGNC:23238]	protein_coding	0.2821	0.88	0.3018	0.9995	0.2667	0.8154
ENSG00000087077	TRIP6	thyroid hormone receptor interactor 6 [Source:HGNC Symbol;Acc:HGNC:12311]	protein_coding	-0.07219	0.9583	-0.05746	0.9995	-0.06653	0.9306
ENSG00000087085	ACHE	acetylcholinesterase (Cartwright blood group) [Source:HGNC Symbol;Acc:HGNC:108]	protein_coding	0.5762	0.8285	0.597	0.9995	0.6603	0.7411
ENSG00000087086	FTL	ferritin light chain [Source:HGNC Symbol;Acc:HGNC:3999]	protein_coding	0.08895	0.9661	0.1075	0.9995	0.2775	0.8101
ENSG00000087087	SRRT	serrate, RNA effector molecule [Source:HGNC Symbol;Acc:HGNC:24101]	protein_coding	0.1411	0.8892	0.1581	0.9995	0.1219	0.8443
ENSG00000087088	BAX	BCL2 associated X, apoptosis regulator [Source:HGNC Symbol;Acc:HGNC:959]	protein_coding	0.3985	0.6975	0.4151	0.942	0.4429	0.6783
ENSG00000087095	NLK	nemo like kinase [Source:HGNC Symbol;Acc:HGNC:29858]	protein_coding	-0.005244	0.9982	0.009964	0.9996	0.05584	0.9392
ENSG00000087116	ADAMTS2	ADAM metallopeptidase with thrombospondin type 1 motif 2 [Source:HGNC Symbol;Acc:HGNC:218]	protein_coding	-0.1932	0.9331	-0.1772	0.9995	-0.3013	0.838
ENSG00000087128	TMPRSS11E	transmembrane serine protease 11E [Source:HGNC Symbol;Acc:HGNC:24465]	protein_coding	0.3941	0.9352	0.4228	0.9995	1.008	0.7411
ENSG00000087152	ATXN7L3	ataxin 7 like 3 [Source:HGNC Symbol;Acc:HGNC:25416]	protein_coding	0.3232	0.6341	0.3396	0.9753	0.3179	0.6681
ENSG00000087157	PGS1	phosphatidylglycerophosphate synthase 1 [Source:HGNC Symbol;Acc:HGNC:30029]	protein_coding	0.2235	0.8834	0.2402	0.9995	0.2857	0.7443
ENSG00000087191	PSMC5	proteasome 26S subunit, ATPase 5 [Source:HGNC Symbol;Acc:HGNC:9552]	protein_coding	0.1821	0.8129	0.2015	0.9995	0.1874	0.7445
ENSG00000087206	UIMC1	ubiquitin interaction motif containing 1 [Source:HGNC Symbol;Acc:HGNC:30298]	protein_coding	0.1	0.9173	0.1215	0.9995	0.1166	0.8378
ENSG00000087237	CETP	cholesteryl ester transfer protein [Source:HGNC Symbol;Acc:HGNC:1869]	protein_coding	0.1752	0.9266	0.1955	0.9995	0.1964	0.8549
ENSG00000087245	MMP2	matrix metallopeptidase 2 [Source:HGNC Symbol;Acc:HGNC:7166]	protein_coding	-0.2223	0.9289	-0.2089	0.9995	-0.08918	0.966
ENSG00000087253	LPCAT2	lysophosphatidylcholine acyltransferase 2 [Source:HGNC Symbol;Acc:HGNC:26032]	protein_coding	-0.2562	0.8361	-0.2355	0.9995	-0.2086	0.7899
ENSG00000087258	GNAO1	G protein subunit alpha o1 [Source:HGNC Symbol;Acc:HGNC:4389]	protein_coding	-0.103	0.977	-0.08192	0.9995	0.06016	0.979
ENSG00000087263	OGFOD1	2-oxoglutarate and iron dependent oxygenase domain containing 1 [Source:HGNC Symbol;Acc:HGNC:25585]	protein_coding	-0.2188	0.916	-0.2034	0.9995	-0.04397	0.9764
ENSG00000087266	SH3BP2	SH3 domain binding protein 2 [Source:HGNC Symbol;Acc:HGNC:10825]	protein_coding	0.2721	0.8372	0.2894	0.9995	0.3044	0.7405
ENSG00000087269	NOP14	NOP14 nucleolar protein [Source:HGNC Symbol;Acc:HGNC:16821]	protein_coding	0.08315	0.9466	0.09967	0.9995	0.1097	0.8726
ENSG00000087274	ADD1	adducin 1 [Source:HGNC Symbol;Acc:HGNC:243]	protein_coding	0.1013	0.9464	0.1177	0.9995	0.04293	0.9656
ENSG00000087299	L2HGDH	L-2-hydroxyglutarate dehydrogenase [Source:HGNC Symbol;Acc:HGNC:20499]	protein_coding	-0.151	0.9181	-0.1177	0.9995	-0.106	0.9094
ENSG00000087301	TXNDC16	thioredoxin domain containing 16 [Source:HGNC Symbol;Acc:HGNC:19965]	protein_coding	-0.2302	0.9331	-0.2086	0.9995	-0.1677	0.9095
ENSG00000087302	RTRAF	RNA transcription, translation and transport factor [Source:HGNC Symbol;Acc:HGNC:23169]	protein_coding	-0.02438	0.9897	-0.002626	0.9996	0.02316	0.9815
ENSG00000087303	NID2	nidogen 2 [Source:HGNC Symbol;Acc:HGNC:13389]	protein_coding	-0.3617	0.9023	-0.3398	0.9995	-0.0378	0.988
ENSG00000087338	GMCL1	germ cell-less 1, spermatogenesis associated [Source:HGNC Symbol;Acc:HGNC:23843]	protein_coding	-0.08981	0.9378	-0.06771	0.9995	-0.07324	0.9179
ENSG00000087365	SF3B2	splicing factor 3b subunit 2 [Source:HGNC Symbol;Acc:HGNC:10769]	protein_coding	0.1915	0.8503	0.2083	0.9995	0.1665	0.8181
ENSG00000087448	KLHL42	kelch like family member 42 [Source:HGNC Symbol;Acc:HGNC:29252]	protein_coding	-0.2524	0.6376	-0.2247	0.9995	-0.2506	0.6735
ENSG00000087460	GNAS	GNAS complex locus [Source:HGNC Symbol;Acc:HGNC:4392]	protein_coding	-0.01924	0.9827	-0.001858	0.9996	0.0515	0.9392
ENSG00000087470	DNM1L	dynamin 1 like [Source:HGNC Symbol;Acc:HGNC:2973]	protein_coding	0.1311	0.9211	0.1506	0.9995	0.1664	0.8272
ENSG00000087494	PTHLH	parathyroid hormone like hormone [Source:HGNC Symbol;Acc:HGNC:9607]	protein_coding	0.6041	0.9095	0.6128	0.9995	0.6544	0.8437
ENSG00000087502	ERGIC2	ERGIC and golgi 2 [Source:HGNC Symbol;Acc:HGNC:30208]	protein_coding	-0.2165	0.9181	-0.1964	0.9995	-0.2201	0.8653
ENSG00000087510	TFAP2C	transcription factor AP-2 gamma [Source:HGNC Symbol;Acc:HGNC:11744]	protein_coding	-0.4566	0.5526	-0.4428	0.9233	-0.3717	0.6786
ENSG00000087586	AURKA	aurora kinase A [Source:HGNC Symbol;Acc:HGNC:11393]	protein_coding	0.4948	0.5574	0.5138	0.7095	0.493	0.5795
ENSG00000087589	CASS4	Cas scaffold protein family member 4 [Source:HGNC Symbol;Acc:HGNC:15878]	protein_coding	-0.3654	0.8532	-0.3479	0.9995	-0.3771	0.7648
ENSG00000087842	PIR	pirin [Source:HGNC Symbol;Acc:HGNC:30048]	protein_coding	-0.5196	0.6465	-0.4971	0.9798	-0.3782	0.7405
ENSG00000087884	AAMDC	adipogenesis associated Mth938 domain containing [Source:HGNC Symbol;Acc:HGNC:30205]	protein_coding	-0.1288	0.9246	-0.1078	0.9995	-0.08496	0.9201
ENSG00000087903	RFX2	regulatory factor X2 [Source:HGNC Symbol;Acc:HGNC:9983]	protein_coding	0.07951	0.9755	0.09609	0.9995	0.2833	0.7937
ENSG00000087995	METTL2A	methyltransferase like 2A [Source:HGNC Symbol;Acc:HGNC:25755]	protein_coding	-0.02542	0.9893	0.004476	0.9996	-0.09752	0.9103
ENSG00000088002	SULT2B1	sulfotransferase family 2B member 1 [Source:HGNC Symbol;Acc:HGNC:11459]	protein_coding	0.0318	0.988	0.05192	0.9995	0.01528	0.9904
ENSG00000088035	ALG6	ALG6 alpha-1,3-glucosyltransferase [Source:HGNC Symbol;Acc:HGNC:23157]	protein_coding	0.0247	0.9904	0.05088	0.9995	-0.01309	0.9919
ENSG00000088038	CNOT3	CCR4-NOT transcription complex subunit 3 [Source:HGNC Symbol;Acc:HGNC:7879]	protein_coding	0.1628	0.8965	0.1774	0.9995	0.2081	0.7746
ENSG00000088179	PTPN4	protein tyrosine phosphatase non-receptor type 4 [Source:HGNC Symbol;Acc:HGNC:9656]	protein_coding	-0.2778	0.8041	-0.2546	0.9995	-0.3063	0.6997
ENSG00000088205	DDX18	DEAD-box helicase 18 [Source:HGNC Symbol;Acc:HGNC:2741]	protein_coding	-0.1291	0.9217	-0.1067	0.9995	-0.09821	0.903
ENSG00000088247	KHSRP	KH-type splicing regulatory protein [Source:HGNC Symbol;Acc:HGNC:6316]	protein_coding	0.1982	0.8965	0.2142	0.9995	0.1893	0.8378
ENSG00000088256	GNA11	G protein subunit alpha 11 [Source:HGNC Symbol;Acc:HGNC:4379]	protein_coding	0.1537	0.9338	0.169	0.9995	0.203	0.8392
ENSG00000088280	ASAP3	ArfGAP with SH3 domain, ankyrin repeat and PH domain 3 [Source:HGNC Symbol;Acc:HGNC:14987]	protein_coding	-0.4595	0.6289	-0.4422	0.9322	-0.393	0.6879
ENSG00000088298	EDEM2	ER degradation enhancing alpha-mannosidase like protein 2 [Source:HGNC Symbol;Acc:HGNC:15877]	protein_coding	0.285	0.4795	0.3024	0.9728	0.2911	0.5839
ENSG00000088305	DNMT3B	DNA methyltransferase 3 beta [Source:HGNC Symbol;Acc:HGNC:2979]	protein_coding	-0.4261	0.7611	-0.4162	0.9995	-0.2582	0.8292
ENSG00000088320	REM1	RRAD and GEM like GTPase 1 [Source:HGNC Symbol;Acc:HGNC:15922]	protein_coding	-0.05336	0.989	-0.03655	0.9995	-0.04789	0.9804
ENSG00000088325	TPX2	TPX2 microtubule nucleation factor [Source:HGNC Symbol;Acc:HGNC:1249]	protein_coding	0.5362	0.3139	0.5534	0.4656	0.5702	0.5217
ENSG00000088356	PDRG1	p53 and DNA damage regulated 1 [Source:HGNC Symbol;Acc:HGNC:16119]	protein_coding	0.1609	0.8838	0.1812	0.9995	0.1788	0.7748
ENSG00000088367	EPB41L1	erythrocyte membrane protein band 4.1 like 1 [Source:HGNC Symbol;Acc:HGNC:3378]	protein_coding	-0.6643	0.5191	-0.6467	0.8157	-0.5348	0.6786
ENSG00000088386	SLC15A1	solute carrier family 15 member 1 [Source:HGNC Symbol;Acc:HGNC:10920]	protein_coding	-0.2032	0.9591	-0.1856	0.9995	-0.1958	0.9249
ENSG00000088387	DOCK9	dedicator of cytokinesis 9 [Source:HGNC Symbol;Acc:HGNC:14132]	protein_coding	-0.3222	0.761	-0.3041	0.9995	-0.307	0.7226
ENSG00000088448	ANKRD10	ankyrin repeat domain 10 [Source:HGNC Symbol;Acc:HGNC:20265]	protein_coding	0.004375	0.9962	0.02764	0.9995	0.01645	0.979
ENSG00000088451	TGDS	TDP-glucose 4,6-dehydratase [Source:HGNC Symbol;Acc:HGNC:20324]	protein_coding	-0.2253	0.8874	-0.2009	0.9995	-0.3049	0.745
ENSG00000088538	DOCK3	dedicator of cytokinesis 3 [Source:HGNC Symbol;Acc:HGNC:2989]	protein_coding	-0.3976	0.8994	-0.3762	0.9995	-0.5768	0.7748
ENSG00000088543	C3orf18	chromosome 3 open reading frame 18 [Source:HGNC Symbol;Acc:HGNC:24837]	protein_coding	-0.2172	0.9107	-0.1988	0.9995	-0.1984	0.8586
ENSG00000088682	COQ9	coenzyme Q9 [Source:HGNC Symbol;Acc:HGNC:25302]	protein_coding	-0.01398	0.9916	0.005421	0.9996	0.008112	0.9932
ENSG00000088726	TMEM40	transmembrane protein 40 [Source:HGNC Symbol;Acc:HGNC:25620]	protein_coding	0.2298	0.939	0.2493	0.9995	0.262	0.8837
ENSG00000088727	KIF9	kinesin family member 9 [Source:HGNC Symbol;Acc:HGNC:16666]	protein_coding	-0.2011	0.8874	-0.1774	0.9995	-0.1144	0.8875
ENSG00000088756	ARHGAP28	Rho GTPase activating protein 28 [Source:HGNC Symbol;Acc:HGNC:25509]	protein_coding	-0.7463	0.5755	-0.7267	0.8417	-0.5201	0.703
ENSG00000088808	PPP1R13B	protein phosphatase 1 regulatory subunit 13B [Source:HGNC Symbol;Acc:HGNC:14950]	protein_coding	-0.1786	0.8957	-0.1621	0.9995	-0.09836	0.9053
ENSG00000088812	ATRN	attractin [Source:HGNC Symbol;Acc:HGNC:885]	protein_coding	-0.1988	0.8598	-0.1826	0.9995	-0.1891	0.7906
ENSG00000088826	SMOX	spermine oxidase [Source:HGNC Symbol;Acc:HGNC:15862]	protein_coding	-0.01872	0.9946	-0.004922	0.9996	0.03452	0.979
ENSG00000088827	SIGLEC1	sialic acid binding Ig like lectin 1 [Source:HGNC Symbol;Acc:HGNC:11127]	protein_coding	0.01671	0.9962	0.03913	0.9995	-0.1109	0.9505
ENSG00000088833	NSFL1C	NSFL1 cofactor [Source:HGNC Symbol;Acc:HGNC:15912]	protein_coding	0.1261	0.9023	0.1415	0.9995	0.1119	0.8632
ENSG00000088836	SLC4A11	solute carrier family 4 member 11 [Source:HGNC Symbol;Acc:HGNC:16438]	protein_coding	-0.09747	0.9728	-0.08502	0.9995	0.09354	0.946
ENSG00000088854	C20orf194	chromosome 20 open reading frame 194 [Source:HGNC Symbol;Acc:HGNC:17721]	protein_coding	-0.0616	0.9606	-0.04936	0.9995	-0.01852	0.9792
ENSG00000088881	EBF4	EBF family member 4 [Source:HGNC Symbol;Acc:HGNC:29278]	protein_coding	0.5235	0.8012	0.5418	0.9995	0.6212	0.6972
ENSG00000088882	CPXM1	carboxypeptidase X, M14 family member 1 [Source:HGNC Symbol;Acc:HGNC:15771]	protein_coding	-0.3048	0.8874	-0.2901	0.9995	-0.211	0.8833
ENSG00000088888	MAVS	mitochondrial antiviral signaling protein [Source:HGNC Symbol;Acc:HGNC:29233]	protein_coding	0.01044	0.9929	0.02612	0.9995	-0.002209	0.9976
ENSG00000088899	LZTS3	leucine zipper tumor suppressor family member 3 [Source:HGNC Symbol;Acc:HGNC:30139]	protein_coding	0.8135	0.6897	0.8264	0.9798	0.9824	0.6046
ENSG00000088930	XRN2	5'-3' exoribonuclease 2 [Source:HGNC Symbol;Acc:HGNC:12836]	protein_coding	0.01107	0.9905	0.02971	0.9995	-0.006411	0.9932
ENSG00000088970	KIZ	kizuna centrosomal protein [Source:HGNC Symbol;Acc:HGNC:15865]	protein_coding	-0.3216	0.8362	-0.3015	0.9995	-0.3913	0.6997
ENSG00000088986	DYNLL1	dynein light chain LC8-type 1 [Source:HGNC Symbol;Acc:HGNC:15476]	protein_coding	-0.05848	0.9738	-0.03963	0.9995	0.09697	0.9135
ENSG00000088992	TESC	tescalcin [Source:HGNC Symbol;Acc:HGNC:26065]	protein_coding	0.5051	0.3537	0.5285	0.6593	0.5105	0.5413
ENSG00000089006	SNX5	sorting nexin 5 [Source:HGNC Symbol;Acc:HGNC:14969]	protein_coding	-0.129	0.9221	-0.1068	0.9995	-0.1002	0.9053
ENSG00000089009	RPL6	ribosomal protein L6 [Source:HGNC Symbol;Acc:HGNC:10362]	protein_coding	-0.4447	0.675	-0.4236	0.9995	-0.1877	0.8311
ENSG00000089012	SIRPG	signal regulatory protein gamma [Source:HGNC Symbol;Acc:HGNC:15757]	protein_coding	0.3057	0.8815	0.3227	0.9995	0.3679	0.7462
ENSG00000089022	MAPKAPK5	MAPK activated protein kinase 5 [Source:HGNC Symbol;Acc:HGNC:6889]	protein_coding	-0.07783	0.9331	-0.05597	0.9995	-0.04833	0.9363
ENSG00000089041	P2RX7	purinergic receptor P2X 7 [Source:HGNC Symbol;Acc:HGNC:8537]	protein_coding	0.1219	0.9524	0.1449	0.9995	0.125	0.9115
ENSG00000089048	ESF1	ESF1 nucleolar pre-rRNA processing protein homolog [Source:HGNC Symbol;Acc:HGNC:15898]	protein_coding	-0.1156	0.944	-0.09267	0.9995	-0.1524	0.8538
ENSG00000089050	RBBP9	RB binding protein 9, serine hydrolase [Source:HGNC Symbol;Acc:HGNC:9892]	protein_coding	-0.2158	0.8458	-0.1939	0.9995	-0.1961	0.779
ENSG00000089053	ANAPC5	anaphase promoting complex subunit 5 [Source:HGNC Symbol;Acc:HGNC:15713]	protein_coding	-0.06029	0.9508	-0.0382	0.9995	-0.02425	0.9748
ENSG00000089057	SLC23A2	solute carrier family 23 member 2 [Source:HGNC Symbol;Acc:HGNC:10973]	protein_coding	-0.08728	0.9537	-0.06977	0.9995	-0.06414	0.9392
ENSG00000089060	SLC8B1	solute carrier family 8 member B1 [Source:HGNC Symbol;Acc:HGNC:26175]	protein_coding	0.06497	0.9721	0.08147	0.9995	0.1064	0.9109
ENSG00000089063	TMEM230	transmembrane protein 230 [Source:HGNC Symbol;Acc:HGNC:15876]	protein_coding	-0.2428	0.7225	-0.2221	0.9995	-0.2458	0.6786
ENSG00000089091	DZANK1	double zinc ribbon and ankyrin repeat domains 1 [Source:HGNC Symbol;Acc:HGNC:15858]	protein_coding	0.2641	0.9051	0.2688	0.9995	0.522	0.6786
ENSG00000089094	KDM2B	lysine demethylase 2B [Source:HGNC Symbol;Acc:HGNC:13610]	protein_coding	0.105	0.93	0.1207	0.9995	0.1386	0.84
ENSG00000089101	CFAP61	cilia and flagella associated protein 61 [Source:HGNC Symbol;Acc:HGNC:15872]	protein_coding	-0.2199	0.9759	-0.1928	0.9995	-0.5709	0.841
ENSG00000089123	TASP1	taspase 1 [Source:HGNC Symbol;Acc:HGNC:15859]	protein_coding	-0.3031	0.7485	-0.2875	0.9995	-0.2243	0.7584
ENSG00000089127	OAS1	2'-5'-oligoadenylate synthetase 1 [Source:HGNC Symbol;Acc:HGNC:8086]	protein_coding	0.5787	0.05835	0.5971	0.3179	0.5318	0.3676
ENSG00000089154	GCN1	GCN1 activator of EIF2AK4 [Source:HGNC Symbol;Acc:HGNC:4199]	protein_coding	0.02098	0.9874	0.03875	0.9995	-0.004169	0.9952
ENSG00000089157	RPLP0	ribosomal protein lateral stalk subunit P0 [Source:HGNC Symbol;Acc:HGNC:10371]	protein_coding	-0.4964	0.4454	-0.4762	0.9753	-0.2186	0.7698
ENSG00000089159	PXN	paxillin [Source:HGNC Symbol;Acc:HGNC:9718]	protein_coding	0.4263	0.6074	0.442	0.9117	0.4129	0.6326
ENSG00000089163	SIRT4	sirtuin 4 [Source:HGNC Symbol;Acc:HGNC:14932]	protein_coding	-0.4616	0.8874	-0.4411	0.9995	-0.3957	0.814
ENSG00000089177	KIF16B	kinesin family member 16B [Source:HGNC Symbol;Acc:HGNC:15869]	protein_coding	-0.04615	0.9739	-0.035	0.9995	0.03331	0.9668
ENSG00000089195	TRMT6	tRNA methyltransferase 6 [Source:HGNC Symbol;Acc:HGNC:20900]	protein_coding	-0.1292	0.916	-0.1054	0.9995	-0.1298	0.841
ENSG00000089220	PEBP1	phosphatidylethanolamine binding protein 1 [Source:HGNC Symbol;Acc:HGNC:8630]	protein_coding	-0.2205	0.6601	-0.2014	0.9995	-0.2129	0.7032
ENSG00000089225	TBX5	T-box transcription factor 5 [Source:HGNC Symbol;Acc:HGNC:11604]	protein_coding	-1.539	0.266	-1.505	0.4392	-1.416	0.5641
ENSG00000089234	BRAP	BRCA1 associated protein [Source:HGNC Symbol;Acc:HGNC:1099]	protein_coding	-0.05367	0.9532	-0.03451	0.9995	-0.03643	0.9482
ENSG00000089248	ERP29	endoplasmic reticulum protein 29 [Source:HGNC Symbol;Acc:HGNC:13799]	protein_coding	0.009677	0.9929	0.02786	0.9995	0.03023	0.9656
ENSG00000089250	NOS1	nitric oxide synthase 1 [Source:HGNC Symbol;Acc:HGNC:7872]	protein_coding	0.424	0.8874	0.4378	0.9995	0.6788	0.7278
ENSG00000089280	FUS	FUS RNA binding protein [Source:HGNC Symbol;Acc:HGNC:4010]	protein_coding	0.04847	0.9629	0.06545	0.9995	0.03946	0.957
ENSG00000089289	IGBP1	immunoglobulin binding protein 1 [Source:HGNC Symbol;Acc:HGNC:5461]	protein_coding	-0.1272	0.9152	-0.1057	0.9995	-0.09144	0.9079
ENSG00000089327	FXYD5	FXYD domain containing ion transport regulator 5 [Source:HGNC Symbol;Acc:HGNC:4029]	protein_coding	0.3227	0.8159	0.3392	0.9995	0.3068	0.7559
ENSG00000089335	ZNF302	zinc finger protein 302 [Source:HGNC Symbol;Acc:HGNC:13848]	protein_coding	-0.5159	0.4396	-0.4929	0.7223	-0.5322	0.5522
ENSG00000089351	GRAMD1A	GRAM domain containing 1A [Source:HGNC Symbol;Acc:HGNC:29305]	protein_coding	0.1842	0.9264	0.2023	0.9995	0.2175	0.8509
ENSG00000089472	HEPH	hephaestin [Source:HGNC Symbol;Acc:HGNC:4866]	protein_coding	-0.4773	0.7572	-0.4578	0.9995	-0.3735	0.7626
ENSG00000089486	CDIP1	cell death inducing p53 target 1 [Source:HGNC Symbol;Acc:HGNC:13234]	protein_coding	0.05328	0.9787	0.06946	0.9995	0.1012	0.9137
ENSG00000089597	GANAB	glucosidase II alpha subunit [Source:HGNC Symbol;Acc:HGNC:4138]	protein_coding	0.06673	0.9585	0.08331	0.9995	0.07237	0.9288
ENSG00000089639	GMIP	GEM interacting protein [Source:HGNC Symbol;Acc:HGNC:24852]	protein_coding	0.3149	0.7782	0.3311	0.9995	0.3555	0.6915
ENSG00000089682	RBM41	RNA binding motif protein 41 [Source:HGNC Symbol;Acc:HGNC:25617]	protein_coding	-0.1012	0.9537	-0.07933	0.9995	-0.08641	0.9313
ENSG00000089685	BIRC5	baculoviral IAP repeat containing 5 [Source:HGNC Symbol;Acc:HGNC:593]	protein_coding	0.4874	0.7335	0.5057	0.9364	0.5629	0.6681
ENSG00000089692	LAG3	lymphocyte activating 3 [Source:HGNC Symbol;Acc:HGNC:6476]	protein_coding	1.453	0.1465	1.47	0.09941	1.521	0.5247
ENSG00000089693	MLF2	myeloid leukemia factor 2 [Source:HGNC Symbol;Acc:HGNC:7126]	protein_coding	0.1837	0.8644	0.1989	0.9995	0.1486	0.8325
ENSG00000089723	OTUB2	OTU deubiquitinase, ubiquitin aldehyde binding 2 [Source:HGNC Symbol;Acc:HGNC:20351]	protein_coding	0.03442	0.9904	0.05363	0.9995	-0.01308	0.9938
ENSG00000089737	DDX24	DEAD-box helicase 24 [Source:HGNC Symbol;Acc:HGNC:13266]	protein_coding	0.02391	0.9872	0.0418	0.9995	0.007345	0.9938
ENSG00000089775	ZBTB25	zinc finger and BTB domain containing 25 [Source:HGNC Symbol;Acc:HGNC:13112]	protein_coding	-0.3159	0.7127	-0.2886	0.9995	-0.3076	0.6827
ENSG00000089818	NECAP1	NECAP endocytosis associated 1 [Source:HGNC Symbol;Acc:HGNC:24539]	protein_coding	-0.08274	0.9537	-0.06123	0.9995	-0.06867	0.9305
ENSG00000089820	ARHGAP4	Rho GTPase activating protein 4 [Source:HGNC Symbol;Acc:HGNC:674]	protein_coding	0.0264	0.9904	0.04325	0.9995	0.0719	0.9517
ENSG00000089847	ANKRD24	ankyrin repeat domain 24 [Source:HGNC Symbol;Acc:HGNC:29424]	protein_coding	-0.101	0.9831	-0.0781	0.9995	-0.09249	0.9768
ENSG00000089876	DHX32	DEAH-box helicase 32 (putative) [Source:HGNC Symbol;Acc:HGNC:16717]	protein_coding	-0.128	0.9331	-0.1049	0.9995	-0.1325	0.88
ENSG00000089902	RCOR1	REST corepressor 1 [Source:HGNC Symbol;Acc:HGNC:17441]	protein_coding	0.1087	0.9338	0.1253	0.9995	0.1555	0.8272
ENSG00000089916	GPATCH2L	G-patch domain containing 2 like [Source:HGNC Symbol;Acc:HGNC:20210]	protein_coding	-0.02405	0.9814	0.00068	0.9996	-0.009886	0.9887
ENSG00000090006	LTBP4	latent transforming growth factor beta binding protein 4 [Source:HGNC Symbol;Acc:HGNC:6717]	protein_coding	-0.0523	0.9776	-0.03651	0.9995	-0.02317	0.9816
ENSG00000090013	BLVRB	biliverdin reductase B [Source:HGNC Symbol;Acc:HGNC:1063]	protein_coding	-0.08478	0.9524	-0.0668	0.9995	-0.06099	0.9392
ENSG00000090020	SLC9A1	solute carrier family 9 member A1 [Source:HGNC Symbol;Acc:HGNC:11071]	protein_coding	0.2361	0.9023	0.2526	0.9995	0.3116	0.7748
ENSG00000090054	SPTLC1	serine palmitoyltransferase long chain base subunit 1 [Source:HGNC Symbol;Acc:HGNC:11277]	protein_coding	-0.0466	0.9762	-0.02543	0.9995	-0.03598	0.964
ENSG00000090060	PAPOLA	poly(A) polymerase alpha [Source:HGNC Symbol;Acc:HGNC:14981]	protein_coding	-0.1392	0.9144	-0.117	0.9995	-0.09462	0.9095
ENSG00000090061	CCNK	cyclin K [Source:HGNC Symbol;Acc:HGNC:1596]	protein_coding	0.1467	0.9466	0.1613	0.9995	0.4513	0.7154
ENSG00000090097	PCBP4	poly(rC) binding protein 4 [Source:HGNC Symbol;Acc:HGNC:8652]	protein_coding	0.07081	0.962	0.0879	0.9995	0.08935	0.9144
ENSG00000090104	RGS1	regulator of G protein signaling 1 [Source:HGNC Symbol;Acc:HGNC:9991]	protein_coding	-0.5202	0.918	-0.4973	0.9995	0.00896	0.9976
ENSG00000090238	YPEL3	yippee like 3 [Source:HGNC Symbol;Acc:HGNC:18327]	protein_coding	-0.1428	0.9071	-0.125	0.9995	-0.1395	0.8441
ENSG00000090263	MRPS33	mitochondrial ribosomal protein S33 [Source:HGNC Symbol;Acc:HGNC:16634]	protein_coding	-0.1463	0.9385	-0.1252	0.9995	-0.1418	0.9053
ENSG00000090266	NDUFB2	NADH:ubiquinone oxidoreductase subunit B2 [Source:HGNC Symbol;Acc:HGNC:7697]	protein_coding	-0.05197	0.9805	-0.03251	0.9995	0.0245	0.9834
ENSG00000090273	NUDC	nuclear distribution C, dynein complex regulator [Source:HGNC Symbol;Acc:HGNC:8045]	protein_coding	0.1302	0.8994	0.1459	0.9995	0.127	0.843
ENSG00000090316	MAEA	macrophage erythroblast attacher [Source:HGNC Symbol;Acc:HGNC:13731]	protein_coding	0.09449	0.934	0.1107	0.9995	0.09611	0.881
ENSG00000090339	ICAM1	intercellular adhesion molecule 1 [Source:HGNC Symbol;Acc:HGNC:5344]	protein_coding	0.441	0.8165	0.4612	0.9995	0.4512	0.7411
ENSG00000090372	STRN4	striatin 4 [Source:HGNC Symbol;Acc:HGNC:15721]	protein_coding	0.2435	0.8678	0.2597	0.9995	0.2456	0.7764
ENSG00000090376	IRAK3	interleukin 1 receptor associated kinase 3 [Source:HGNC Symbol;Acc:HGNC:17020]	protein_coding	-0.1191	0.9461	-0.09666	0.9995	-0.04904	0.9645
ENSG00000090382	LYZ	lysozyme [Source:HGNC Symbol;Acc:HGNC:6740]	protein_coding	-0.6372	0.7838	-0.6182	0.9995	-0.6793	0.7202
ENSG00000090432	MUL1	mitochondrial E3 ubiquitin protein ligase 1 [Source:HGNC Symbol;Acc:HGNC:25762]	protein_coding	0.1501	0.9036	0.1647	0.9995	0.1944	0.7802
ENSG00000090447	TFAP4	transcription factor AP-4 [Source:HGNC Symbol;Acc:HGNC:11745]	protein_coding	0.02205	0.991	0.03263	0.9995	0.1485	0.8773
ENSG00000090470	PDCD7	programmed cell death 7 [Source:HGNC Symbol;Acc:HGNC:8767]	protein_coding	0.1416	0.8874	0.1653	0.9995	0.1407	0.8111
ENSG00000090487	SPG21	SPG21 abhydrolase domain containing, maspardin [Source:HGNC Symbol;Acc:HGNC:20373]	protein_coding	-0.07897	0.9442	-0.0584	0.9995	-0.07508	0.9097
ENSG00000090512	FETUB	fetuin B [Source:HGNC Symbol;Acc:HGNC:3658]	protein_coding	-2.479	0.4124	-2.292	0.488	-1.998	0.5472
ENSG00000090520	DNAJB11	DnaJ heat shock protein family (Hsp40) member B11 [Source:HGNC Symbol;Acc:HGNC:14889]	protein_coding	0.1825	0.9181	0.2003	0.9995	0.1928	0.8458
ENSG00000090530	P3H2	prolyl 3-hydroxylase 2 [Source:HGNC Symbol;Acc:HGNC:19317]	protein_coding	0.03578	0.9908	0.05197	0.9995	0.3415	0.8272
ENSG00000090539	CHRD	chordin [Source:HGNC Symbol;Acc:HGNC:1949]	protein_coding	0.08293	0.9744	0.09907	0.9995	0.2277	0.8482
ENSG00000090565	RAB11FIP3	RAB11 family interacting protein 3 [Source:HGNC Symbol;Acc:HGNC:17224]	protein_coding	0.08899	0.9378	0.1062	0.9995	0.1143	0.8551
ENSG00000090581	GNPTG	N-acetylglucosamine-1-phosphate transferase subunit gamma [Source:HGNC Symbol;Acc:HGNC:23026]	protein_coding	-0.1495	0.8874	-0.1335	0.9995	-0.1339	0.8392
ENSG00000090612	ZNF268	zinc finger protein 268 [Source:HGNC Symbol;Acc:HGNC:13061]	protein_coding	-0.2216	0.8899	-0.1982	0.9995	-0.2028	0.8325
ENSG00000090615	GOLGA3	golgin A3 [Source:HGNC Symbol;Acc:HGNC:4426]	protein_coding	0.00966	0.9952	0.02651	0.9995	0.01157	0.9917
ENSG00000090621	PABPC4	poly(A) binding protein cytoplasmic 4 [Source:HGNC Symbol;Acc:HGNC:8557]	protein_coding	-0.1912	0.87	-0.1743	0.9995	-0.1946	0.7965
ENSG00000090659	CD209	CD209 molecule [Source:HGNC Symbol;Acc:HGNC:1641]	protein_coding	-0.8586	0.6362	-0.8404	0.7763	-1.196	0.5641
ENSG00000090661	CERS4	ceramide synthase 4 [Source:HGNC Symbol;Acc:HGNC:23747]	protein_coding	-0.1123	0.9237	-0.09135	0.9995	-0.1171	0.8663
ENSG00000090674	MCOLN1	mucolipin 1 [Source:HGNC Symbol;Acc:HGNC:13356]	protein_coding	0.2479	0.8128	0.2644	0.9995	0.2815	0.703
ENSG00000090686	USP48	ubiquitin specific peptidase 48 [Source:HGNC Symbol;Acc:HGNC:18533]	protein_coding	-0.1714	0.9023	-0.1498	0.9995	-0.1565	0.8482
ENSG00000090776	EFNB1	ephrin B1 [Source:HGNC Symbol;Acc:HGNC:3226]	protein_coding	0.1781	0.9314	0.1937	0.9995	0.177	0.877
ENSG00000090857	PDPR	pyruvate dehydrogenase phosphatase regulatory subunit [Source:HGNC Symbol;Acc:HGNC:30264]	protein_coding	-0.09468	0.9612	-0.07631	0.9995	-0.0995	0.9325
ENSG00000090861	AARS1	alanyl-tRNA synthetase 1 [Source:HGNC Symbol;Acc:HGNC:20]	protein_coding	0.1212	0.9461	0.1377	0.9995	0.1284	0.9103
ENSG00000090863	GLG1	golgi glycoprotein 1 [Source:HGNC Symbol;Acc:HGNC:4316]	protein_coding	-0.04364	0.9795	-0.02671	0.9995	-0.08321	0.9309
ENSG00000090889	KIF4A	kinesin family member 4A [Source:HGNC Symbol;Acc:HGNC:13339]	protein_coding	0.5077	0.546	0.5251	0.7797	0.6364	0.5247
ENSG00000090905	TNRC6A	trinucleotide repeat containing adaptor 6A [Source:HGNC Symbol;Acc:HGNC:11969]	protein_coding	-0.1536	0.8451	-0.1391	0.9995	-0.1519	0.7648
ENSG00000090924	PLEKHG2	pleckstrin homology and RhoGEF domain containing G2 [Source:HGNC Symbol;Acc:HGNC:29515]	protein_coding	0.5486	0.5912	0.5657	0.7526	0.5793	0.5755
ENSG00000090971	NAT14	N-acetyltransferase 14 (putative) [Source:HGNC Symbol;Acc:HGNC:28918]	protein_coding	0.1345	0.9462	0.1483	0.9995	0.2745	0.7964
ENSG00000090975	PITPNM2	phosphatidylinositol transfer protein membrane associated 2 [Source:HGNC Symbol;Acc:HGNC:21044]	protein_coding	0.2608	0.8759	0.2761	0.9995	0.3455	0.7228
ENSG00000090989	EXOC1	exocyst complex component 1 [Source:HGNC Symbol;Acc:HGNC:30380]	protein_coding	-0.2537	0.8151	-0.2316	0.9995	-0.2334	0.7423
ENSG00000091039	OSBPL8	oxysterol binding protein like 8 [Source:HGNC Symbol;Acc:HGNC:16396]	protein_coding	-0.2273	0.8488	-0.2058	0.9995	-0.2202	0.7648
ENSG00000091073	DTX2	deltex E3 ubiquitin ligase 2 [Source:HGNC Symbol;Acc:HGNC:15973]	protein_coding	0.1087	0.9606	0.1243	0.9995	0.1877	0.8569
ENSG00000091106	NLRC4	NLR family CARD domain containing 4 [Source:HGNC Symbol;Acc:HGNC:16412]	protein_coding	0.1566	0.9246	0.1768	0.9995	0.1995	0.8372
ENSG00000091127	PUS7	pseudouridine synthase 7 [Source:HGNC Symbol;Acc:HGNC:26033]	protein_coding	-0.3844	0.6465	-0.3702	0.9995	-0.2884	0.7035
ENSG00000091128	LAMB4	laminin subunit beta 4 [Source:HGNC Symbol;Acc:HGNC:6491]	protein_coding	-0.3013	0.9612	-0.287	0.9995	-0.3445	0.9383
ENSG00000091129	NRCAM	neuronal cell adhesion molecule [Source:HGNC Symbol;Acc:HGNC:7994]	protein_coding	0.2292	0.9132	0.2462	0.9995	0.4394	0.7201
ENSG00000091136	LAMB1	laminin subunit beta 1 [Source:HGNC Symbol;Acc:HGNC:6486]	protein_coding	0.05533	0.9853	0.07268	0.9995	-0.07318	0.967
ENSG00000091137	SLC26A4	solute carrier family 26 member 4 [Source:HGNC Symbol;Acc:HGNC:8818]	protein_coding	-0.1638	0.9792	-0.1388	0.9995	0.8737	0.8013
ENSG00000091140	DLD	dihydrolipoamide dehydrogenase [Source:HGNC Symbol;Acc:HGNC:2898]	protein_coding	-0.2056	0.8874	-0.1825	0.9995	-0.176	0.841
ENSG00000091157	WDR7	WD repeat domain 7 [Source:HGNC Symbol;Acc:HGNC:13490]	protein_coding	-0.2438	0.7977	-0.2238	0.9995	-0.2115	0.7438
ENSG00000091164	TXNL1	thioredoxin like 1 [Source:HGNC Symbol;Acc:HGNC:12436]	protein_coding	0.007332	0.9962	0.02852	0.9995	0.02963	0.9692
ENSG00000091181	IL5RA	interleukin 5 receptor subunit alpha [Source:HGNC Symbol;Acc:HGNC:6017]	protein_coding	-1.386	0.289	-1.367	0.3393	-1.425	0.5384
ENSG00000091262	ABCC6	ATP binding cassette subfamily C member 6 [Source:HGNC Symbol;Acc:HGNC:57]	protein_coding	0.001399	0.9992	0.02079	0.9996	0.1708	0.9366
ENSG00000091317	CMTM6	CKLF like MARVEL transmembrane domain containing 6 [Source:HGNC Symbol;Acc:HGNC:19177]	protein_coding	-0.09633	0.9528	-0.07432	0.9995	-0.07713	0.9352
ENSG00000091409	ITGA6	integrin subunit alpha 6 [Source:HGNC Symbol;Acc:HGNC:6142]	protein_coding	0.02217	0.9949	0.03751	0.9995	-0.156	0.9288
ENSG00000091428	RAPGEF4	Rap guanine nucleotide exchange factor 4 [Source:HGNC Symbol;Acc:HGNC:16626]	protein_coding	-0.3592	0.5398	-0.3437	0.9995	-0.3007	0.6681
ENSG00000091436	MAP3K20	mitogen-activated protein kinase kinase kinase 20 [Source:HGNC Symbol;Acc:HGNC:17797]	protein_coding	-0.112	0.9331	-0.09415	0.9995	-0.1216	0.8589
ENSG00000091483	FH	fumarate hydratase [Source:HGNC Symbol;Acc:HGNC:3700]	protein_coding	-0.1865	0.8818	-0.1666	0.9995	-0.1615	0.8345
ENSG00000091490	SEL1L3	SEL1L family member 3 [Source:HGNC Symbol;Acc:HGNC:29108]	protein_coding	-0.2255	0.9217	-0.2067	0.9995	-0.1104	0.9519
ENSG00000091513	TF	transferrin [Source:HGNC Symbol;Acc:HGNC:11740]	protein_coding	-0.2828	0.9517	-0.263	0.9995	-0.2337	0.9157
ENSG00000091527	CDV3	CDV3 homolog [Source:HGNC Symbol;Acc:HGNC:26928]	protein_coding	0.02563	0.9811	0.04615	0.9995	0.05687	0.9309
ENSG00000091542	ALKBH5	alkB homolog 5, RNA demethylase [Source:HGNC Symbol;Acc:HGNC:25996]	protein_coding	0.2577	0.7188	0.2728	0.9995	0.2574	0.6997
ENSG00000091592	NLRP1	NLR family pyrin domain containing 1 [Source:HGNC Symbol;Acc:HGNC:14374]	protein_coding	-0.1512	0.8665	-0.1336	0.9995	-0.1447	0.8111
ENSG00000091622	PITPNM3	PITPNM family member 3 [Source:HGNC Symbol;Acc:HGNC:21043]	protein_coding	0.2277	0.9089	0.242	0.9995	0.4145	0.7588
ENSG00000091640	SPAG7	sperm associated antigen 7 [Source:HGNC Symbol;Acc:HGNC:11216]	protein_coding	0.01311	0.9929	0.03027	0.9995	0.03432	0.969
ENSG00000091651	ORC6	origin recognition complex subunit 6 [Source:HGNC Symbol;Acc:HGNC:17151]	protein_coding	0.1804	0.9289	0.1928	0.9995	0.238	0.8455
ENSG00000091656	ZFHX4	zinc finger homeobox 4 [Source:HGNC Symbol;Acc:HGNC:30939]	protein_coding	-0.8295	0.718	-0.808	0.9907	-0.9564	0.6786
ENSG00000091732	ZC3HC1	zinc finger C3HC-type containing 1 [Source:HGNC Symbol;Acc:HGNC:29913]	protein_coding	0.2016	0.7639	0.2118	0.9995	0.2395	0.6786
ENSG00000091831	ESR1	estrogen receptor 1 [Source:HGNC Symbol;Acc:HGNC:3467]	protein_coding	-0.1389	0.9524	-0.1184	0.9995	-0.02214	0.988
ENSG00000091844	RGS17	regulator of G protein signaling 17 [Source:HGNC Symbol;Acc:HGNC:14088]	protein_coding	-0.05868	0.9894	-0.03757	0.9995	-0.2829	0.9097
ENSG00000091947	TMEM101	transmembrane protein 101 [Source:HGNC Symbol;Acc:HGNC:28653]	protein_coding	-0.01519	0.9917	0.004026	0.9996	0.01048	0.9919
ENSG00000091972	CD200	CD200 molecule [Source:HGNC Symbol;Acc:HGNC:7203]	protein_coding	0.1132	0.9661	0.1337	0.9995	0.2611	0.841
ENSG00000091986	CCDC80	coiled-coil domain containing 80 [Source:HGNC Symbol;Acc:HGNC:30649]	protein_coding	-1.664	0.06616	-1.645	0.08958	-1.476	0.5349
ENSG00000092009	CMA1	chymase 1 [Source:HGNC Symbol;Acc:HGNC:2097]	protein_coding	-0.6126	0.8532	-0.59	0.9995	-0.603	0.779
ENSG00000092010	PSME1	proteasome activator subunit 1 [Source:HGNC Symbol;Acc:HGNC:9568]	protein_coding	0.2997	0.4562	0.3191	0.9995	0.3306	0.5641
ENSG00000092051	JPH4	junctophilin 4 [Source:HGNC Symbol;Acc:HGNC:20156]	protein_coding	-0.006119	0.9992	0.007505	0.9996	-0.2126	0.9201
ENSG00000092068	SLC7A8	solute carrier family 7 member 8 [Source:HGNC Symbol;Acc:HGNC:11066]	protein_coding	-0.407	0.8012	-0.393	0.9995	-0.2992	0.8007
ENSG00000092094	OSGEP	O-sialoglycoprotein endopeptidase [Source:HGNC Symbol;Acc:HGNC:18028]	protein_coding	-0.03495	0.9795	-0.0133	0.9995	-0.01248	0.9881
ENSG00000092096	SLC22A17	solute carrier family 22 member 17 [Source:HGNC Symbol;Acc:HGNC:23095]	protein_coding	-0.308	0.88	-0.2812	0.9995	-0.2591	0.8086
ENSG00000092108	SCFD1	sec1 family domain containing 1 [Source:HGNC Symbol;Acc:HGNC:20726]	protein_coding	-0.2437	0.8874	-0.2217	0.9995	-0.2073	0.841
ENSG00000092140	G2E3	G2/M-phase specific E3 ubiquitin protein ligase [Source:HGNC Symbol;Acc:HGNC:20338]	protein_coding	0.006552	0.9985	0.02929	0.9995	-0.03908	0.9768
ENSG00000092148	HECTD1	HECT domain E3 ubiquitin protein ligase 1 [Source:HGNC Symbol;Acc:HGNC:20157]	protein_coding	-0.3709	0.6273	-0.3533	0.9753	-0.3262	0.6786
ENSG00000092199	HNRNPC	heterogeneous nuclear ribonucleoprotein C [Source:HGNC Symbol;Acc:HGNC:5035]	protein_coding	-0.05119	0.9708	-0.03038	0.9995	0.05246	0.9414
ENSG00000092200	RPGRIP1	RPGR interacting protein 1 [Source:HGNC Symbol;Acc:HGNC:13436]	protein_coding	-0.6905	0.7082	-0.6682	0.9907	-0.719	0.6783
ENSG00000092201	SUPT16H	SPT16 homolog, facilitates chromatin remodeling subunit [Source:HGNC Symbol;Acc:HGNC:11465]	protein_coding	0.09113	0.9158	0.1108	0.9995	0.09767	0.8619
ENSG00000092203	TOX4	TOX high mobility group box family member 4 [Source:HGNC Symbol;Acc:HGNC:20161]	protein_coding	0.07584	0.9091	0.09631	0.9995	0.08764	0.8551
ENSG00000092208	GEMIN2	gem nuclear organelle associated protein 2 [Source:HGNC Symbol;Acc:HGNC:10884]	protein_coding	0.03091	0.9901	0.05324	0.9995	-0.01542	0.9919
ENSG00000092295	TGM1	transglutaminase 1 [Source:HGNC Symbol;Acc:HGNC:11777]	protein_coding	0.1562	0.93	0.175	0.9995	0.119	0.91
ENSG00000092330	TINF2	TERF1 interacting nuclear factor 2 [Source:HGNC Symbol;Acc:HGNC:11824]	protein_coding	0.09014	0.9023	0.1079	0.9995	0.08316	0.8619
ENSG00000092345	DAZL	deleted in azoospermia like [Source:HGNC Symbol;Acc:HGNC:2685]	protein_coding	-0.642	0.8994	-0.6193	0.9995	-1.333	0.6786
ENSG00000092377	TBL1Y	transducin beta like 1 Y-linked [Source:HGNC Symbol;Acc:HGNC:18502]	protein_coding	-1.611	0.6897	-1.551	0.9695	-1.152	0.7582
ENSG00000092421	SEMA6A	semaphorin 6A [Source:HGNC Symbol;Acc:HGNC:10738]	protein_coding	0.02194	0.9929	0.04484	0.9995	0.1327	0.9103
ENSG00000092439	TRPM7	transient receptor potential cation channel subfamily M member 7 [Source:HGNC Symbol;Acc:HGNC:17994]	protein_coding	-0.1619	0.9081	-0.1392	0.9995	-0.1542	0.8415
ENSG00000092445	TYRO3	TYRO3 protein tyrosine kinase [Source:HGNC Symbol;Acc:HGNC:12446]	protein_coding	-0.4273	0.8012	-0.408	0.9995	-0.4203	0.7411
ENSG00000092470	WDR76	WD repeat domain 76 [Source:HGNC Symbol;Acc:HGNC:25773]	protein_coding	0.2451	0.7358	0.2613	0.9995	0.2847	0.6592
ENSG00000092607	TBX15	T-box transcription factor 15 [Source:HGNC Symbol;Acc:HGNC:11594]	protein_coding	-0.3122	0.8499	-0.2967	0.9995	-0.1419	0.8806
ENSG00000092621	PHGDH	phosphoglycerate dehydrogenase [Source:HGNC Symbol;Acc:HGNC:8923]	protein_coding	-0.1345	0.9612	-0.1169	0.9995	-0.01524	0.9938
ENSG00000092758	COL9A3	collagen type IX alpha 3 chain [Source:HGNC Symbol;Acc:HGNC:2219]	protein_coding	-0.05215	0.9896	-0.03042	0.9996	0.01387	0.9946
ENSG00000092820	EZR	ezrin [Source:HGNC Symbol;Acc:HGNC:12691]	protein_coding	0.128	0.9089	0.1461	0.9995	0.1397	0.8457
ENSG00000092841	MYL6	myosin light chain 6 [Source:HGNC Symbol;Acc:HGNC:7587]	protein_coding	0.1744	0.9199	0.1937	0.9995	0.3952	0.6827
ENSG00000092847	AGO1	argonaute RISC component 1 [Source:HGNC Symbol;Acc:HGNC:3262]	protein_coding	0.02915	0.9805	0.04451	0.9995	0.04853	0.9393
ENSG00000092853	CLSPN	claspin [Source:HGNC Symbol;Acc:HGNC:19715]	protein_coding	0.5897	0.4095	0.6053	0.644	0.6821	0.5217
ENSG00000092871	RFFL	ring finger and FYVE like domain containing E3 ubiquitin protein ligase [Source:HGNC Symbol;Acc:HGNC:24821]	protein_coding	-0.009028	0.9955	0.01043	0.9996	0.0115	0.9904
ENSG00000092929	UNC13D	unc-13 homolog D [Source:HGNC Symbol;Acc:HGNC:23147]	protein_coding	0.2379	0.8598	0.2551	0.9995	0.2946	0.7311
ENSG00000092931	MFSD11	major facilitator superfamily domain containing 11 [Source:HGNC Symbol;Acc:HGNC:25458]	protein_coding	-0.1811	0.8965	-0.1589	0.9995	-0.1272	0.8727
ENSG00000092964	DPYSL2	dihydropyrimidinase like 2 [Source:HGNC Symbol;Acc:HGNC:3014]	protein_coding	-0.07529	0.9612	-0.05582	0.9995	-0.09091	0.913
ENSG00000092969	TGFB2	transforming growth factor beta 2 [Source:HGNC Symbol;Acc:HGNC:11768]	protein_coding	-0.3663	0.9023	-0.3475	0.9995	-0.06572	0.979
ENSG00000092978	GPATCH2	G-patch domain containing 2 [Source:HGNC Symbol;Acc:HGNC:25499]	protein_coding	-0.07975	0.9466	-0.05497	0.9995	-0.07502	0.9103
ENSG00000093000	NUP50	nucleoporin 50 [Source:HGNC Symbol;Acc:HGNC:8065]	protein_coding	-0.04984	0.9612	-0.02896	0.9995	-0.04783	0.9363
ENSG00000093009	CDC45	cell division cycle 45 [Source:HGNC Symbol;Acc:HGNC:1739]	protein_coding	0.4959	0.4151	0.5085	0.7797	0.5848	0.5217
ENSG00000093010	COMT	catechol-O-methyltransferase [Source:HGNC Symbol;Acc:HGNC:2228]	protein_coding	0.1629	0.8948	0.1793	0.9995	0.1618	0.8272
ENSG00000093072	ADA2	adenosine deaminase 2 [Source:HGNC Symbol;Acc:HGNC:1839]	protein_coding	-0.3778	0.8025	-0.3593	0.9995	-0.355	0.7626
ENSG00000093134	VNN3	vanin 3 [Source:HGNC Symbol;Acc:HGNC:16431]	protein_coding	-0.3937	0.9187	-0.3729	0.9995	-0.1315	0.9656
ENSG00000093144	ECHDC1	ethylmalonyl-CoA decarboxylase 1 [Source:HGNC Symbol;Acc:HGNC:21489]	protein_coding	-0.2258	0.8874	-0.204	0.9995	-0.1921	0.8392
ENSG00000093167	LRRFIP2	LRR binding FLII interacting protein 2 [Source:HGNC Symbol;Acc:HGNC:6703]	protein_coding	0.05638	0.939	0.06915	0.9995	0.04416	0.936
ENSG00000093183	SEC22C	SEC22 homolog C, vesicle trafficking protein [Source:HGNC Symbol;Acc:HGNC:16828]	protein_coding	0.1044	0.8874	0.1219	0.9995	0.1226	0.7933
ENSG00000093217	XYLB	xylulokinase [Source:HGNC Symbol;Acc:HGNC:12839]	protein_coding	-0.6396	0.7335	-0.6186	0.9995	-0.5045	0.7262
ENSG00000094631	HDAC6	histone deacetylase 6 [Source:HGNC Symbol;Acc:HGNC:14064]	protein_coding	0.1008	0.9217	0.1165	0.9995	0.1186	0.8478
ENSG00000094755	GABRP	gamma-aminobutyric acid type A receptor pi subunit [Source:HGNC Symbol;Acc:HGNC:4089]	protein_coding	0.5376	0.7467	0.5549	0.9903	0.8233	0.5505
ENSG00000094796	KRT31	keratin 31 [Source:HGNC Symbol;Acc:HGNC:6448]	protein_coding	-1.772	0.6455	-1.717	0.9661	-0.4809	0.9237
ENSG00000094804	CDC6	cell division cycle 6 [Source:HGNC Symbol;Acc:HGNC:1744]	protein_coding	0.4885	0.6897	0.5059	0.9137	0.4935	0.6786
ENSG00000094841	UPRT	uracil phosphoribosyltransferase homolog [Source:HGNC Symbol;Acc:HGNC:28334]	protein_coding	0.04894	0.9732	0.06753	0.9995	0.05809	0.9371
ENSG00000094880	CDC23	cell division cycle 23 [Source:HGNC Symbol;Acc:HGNC:1724]	protein_coding	-0.1689	0.8041	-0.1475	0.9995	-0.153	0.7552
ENSG00000094914	AAAS	aladin WD repeat nucleoporin [Source:HGNC Symbol;Acc:HGNC:13666]	protein_coding	0.2209	0.8089	0.2374	0.9995	0.2497	0.7035
ENSG00000094916	CBX5	chromobox 5 [Source:HGNC Symbol;Acc:HGNC:1555]	protein_coding	0.04333	0.967	0.06041	0.9995	0.03937	0.9519
ENSG00000094963	FMO2	flavin containing dimethylaniline monoxygenase 2 [Source:HGNC Symbol;Acc:HGNC:3770]	protein_coding	-1.351	0.6784	-1.315	0.9255	-1.311	0.7394
ENSG00000094975	SUCO	SUN domain containing ossification factor [Source:HGNC Symbol;Acc:HGNC:1240]	protein_coding	-0.2659	0.8634	-0.2442	0.9995	-0.2424	0.7899
ENSG00000095002	MSH2	mutS homolog 2 [Source:HGNC Symbol;Acc:HGNC:7325]	protein_coding	-0.06236	0.97	-0.03842	0.9995	-0.09836	0.9059
ENSG00000095015	MAP3K1	mitogen-activated protein kinase kinase kinase 1 [Source:HGNC Symbol;Acc:HGNC:6848]	protein_coding	-0.285	0.6784	-0.2625	0.9995	-0.2749	0.6786
ENSG00000095066	HOOK2	hook microtubule tethering protein 2 [Source:HGNC Symbol;Acc:HGNC:19885]	protein_coding	0.01057	0.9929	0.02805	0.9995	0.04402	0.946
ENSG00000095139	ARCN1	archain 1 [Source:HGNC Symbol;Acc:HGNC:649]	protein_coding	0.0939	0.9346	0.1121	0.9995	0.08268	0.9135
ENSG00000095203	EPB41L4B	erythrocyte membrane protein band 4.1 like 4B [Source:HGNC Symbol;Acc:HGNC:19818]	protein_coding	-0.2489	0.8708	-0.2248	0.9995	-0.1928	0.8346
ENSG00000095209	TMEM38B	transmembrane protein 38B [Source:HGNC Symbol;Acc:HGNC:25535]	protein_coding	-0.0614	0.9805	-0.03874	0.9995	-0.07152	0.9581
ENSG00000095261	PSMD5	proteasome 26S subunit, non-ATPase 5 [Source:HGNC Symbol;Acc:HGNC:9563]	protein_coding	0.001653	0.9992	0.02331	0.9995	0.007344	0.9935
ENSG00000095303	PTGS1	prostaglandin-endoperoxide synthase 1 [Source:HGNC Symbol;Acc:HGNC:9604]	protein_coding	-0.4732	0.6465	-0.4558	0.9344	-0.4646	0.6786
ENSG00000095319	NUP188	nucleoporin 188 [Source:HGNC Symbol;Acc:HGNC:17859]	protein_coding	0.09307	0.9608	0.1104	0.9995	0.1247	0.8989
ENSG00000095321	CRAT	carnitine O-acetyltransferase [Source:HGNC Symbol;Acc:HGNC:2342]	protein_coding	-0.1707	0.9591	-0.1531	0.9995	0.06241	0.9742
ENSG00000095370	SH2D3C	SH2 domain containing 3C [Source:HGNC Symbol;Acc:HGNC:16884]	protein_coding	0.2687	0.8412	0.2854	0.9995	0.3122	0.7226
ENSG00000095380	NANS	N-acetylneuraminate synthase [Source:HGNC Symbol;Acc:HGNC:19237]	protein_coding	0.111	0.9385	0.1311	0.9995	0.139	0.8603
ENSG00000095383	TBC1D2	TBC1 domain family member 2 [Source:HGNC Symbol;Acc:HGNC:18026]	protein_coding	0.4522	0.6897	0.4691	0.9255	0.4988	0.6274
ENSG00000095397	WHRN	whirlin [Source:HGNC Symbol;Acc:HGNC:16361]	protein_coding	0.9094	0.07785	0.9242	0.1296	0.9727	0.3511
ENSG00000095464	PDE6C	phosphodiesterase 6C [Source:HGNC Symbol;Acc:HGNC:8787]	protein_coding	0.3523	0.8854	0.3631	0.9995	0.4497	0.745
ENSG00000095485	CWF19L1	CWF19 like cell cycle control factor 1 [Source:HGNC Symbol;Acc:HGNC:25613]	protein_coding	-0.1186	0.9341	-0.09803	0.9995	-0.146	0.8551
ENSG00000095564	BTAF1	B-TFIID TATA-box binding protein associated factor 1 [Source:HGNC Symbol;Acc:HGNC:17307]	protein_coding	-0.232	0.8532	-0.2104	0.9995	-0.2178	0.7835
ENSG00000095574	IKZF5	IKAROS family zinc finger 5 [Source:HGNC Symbol;Acc:HGNC:14283]	protein_coding	-0.3469	0.889	-0.3282	0.9995	-0.1578	0.9135
ENSG00000095585	BLNK	B cell linker [Source:HGNC Symbol;Acc:HGNC:14211]	protein_coding	-0.05355	0.9805	-0.03406	0.9995	0.04429	0.9693
ENSG00000095587	TLL2	tolloid like 2 [Source:HGNC Symbol;Acc:HGNC:11844]	protein_coding	-0.2278	0.9628	-0.2106	0.9995	-0.2739	0.9422
ENSG00000095637	SORBS1	sorbin and SH3 domain containing 1 [Source:HGNC Symbol;Acc:HGNC:14565]	protein_coding	-0.2707	0.9246	-0.2468	0.9995	0.07353	0.9758
ENSG00000095739	BAMBI	BMP and activin membrane bound inhibitor [Source:HGNC Symbol;Acc:HGNC:30251]	protein_coding	-1.104	0.6242	-1.079	0.8766	-0.7958	0.7567
ENSG00000095752	IL11	interleukin 11 [Source:HGNC Symbol;Acc:HGNC:5966]	protein_coding	2.112	0.3644	2.118	0.3179	1.744	0.6786
ENSG00000095787	WAC	WW domain containing adaptor with coiled-coil [Source:HGNC Symbol;Acc:HGNC:17327]	protein_coding	-0.09814	0.9289	-0.07694	0.9995	-0.09098	0.8875
ENSG00000095794	CREM	cAMP responsive element modulator [Source:HGNC Symbol;Acc:HGNC:2352]	protein_coding	0.2151	0.9349	0.2357	0.9995	0.294	0.841
ENSG00000095951	HIVEP1	HIVEP zinc finger 1 [Source:HGNC Symbol;Acc:HGNC:4920]	protein_coding	0.1637	0.8994	0.1811	0.9995	0.1677	0.8272
ENSG00000095970	TREM2	triggering receptor expressed on myeloid cells 2 [Source:HGNC Symbol;Acc:HGNC:17761]	protein_coding	-0.1829	0.9591	-0.1644	0.9995	-0.1031	0.9633
ENSG00000096060	FKBP5	FKBP prolyl isomerase 5 [Source:HGNC Symbol;Acc:HGNC:3721]	protein_coding	-0.09643	0.9661	-0.07336	0.9995	-0.06248	0.9644
ENSG00000096063	SRPK1	SRSF protein kinase 1 [Source:HGNC Symbol;Acc:HGNC:11305]	protein_coding	-0.152	0.9217	-0.1305	0.9995	-0.1793	0.841
ENSG00000096070	BRPF3	bromodomain and PHD finger containing 3 [Source:HGNC Symbol;Acc:HGNC:14256]	protein_coding	0.05074	0.9795	0.06713	0.9995	0.1383	0.8712
ENSG00000096080	MRPS18A	mitochondrial ribosomal protein S18A [Source:HGNC Symbol;Acc:HGNC:14515]	protein_coding	-0.1039	0.9378	-0.08965	0.9995	-0.05319	0.9515
ENSG00000096092	TMEM14A	transmembrane protein 14A [Source:HGNC Symbol;Acc:HGNC:21076]	protein_coding	-0.2948	0.8259	-0.2681	0.9995	-0.3602	0.6933
ENSG00000096093	EFHC1	EF-hand domain containing 1 [Source:HGNC Symbol;Acc:HGNC:16406]	protein_coding	-0.6081	0.3019	-0.5816	0.5968	-0.6354	0.5217
ENSG00000096384	HSP90AB1	heat shock protein 90 alpha family class B member 1 [Source:HGNC Symbol;Acc:HGNC:5258]	protein_coding	0.09714	0.9672	0.1156	0.9995	0.1136	0.9392
ENSG00000096401	CDC5L	cell division cycle 5 like [Source:HGNC Symbol;Acc:HGNC:1743]	protein_coding	0.01984	0.9904	0.04043	0.9995	0.03463	0.967
ENSG00000096433	ITPR3	inositol 1,4,5-trisphosphate receptor type 3 [Source:HGNC Symbol;Acc:HGNC:6182]	protein_coding	0.07187	0.9726	0.0885	0.9995	0.04147	0.9737
ENSG00000096654	ZNF184	zinc finger protein 184 [Source:HGNC Symbol;Acc:HGNC:12975]	protein_coding	-0.0609	0.9797	-0.04049	0.9995	-0.1065	0.9342
ENSG00000096696	DSP	desmoplakin [Source:HGNC Symbol;Acc:HGNC:3052]	protein_coding	-0.01114	0.9977	0.007098	0.9996	0.06769	0.9734
ENSG00000096717	SIRT1	sirtuin 1 [Source:HGNC Symbol;Acc:HGNC:14929]	protein_coding	-0.321	0.8025	-0.3004	0.9995	-0.2777	0.7411
ENSG00000096746	HNRNPH3	heterogeneous nuclear ribonucleoprotein H3 [Source:HGNC Symbol;Acc:HGNC:5043]	protein_coding	0.07508	0.9495	0.09631	0.9995	0.1016	0.875
ENSG00000096872	IFT74	intraflagellar transport 74 [Source:HGNC Symbol;Acc:HGNC:21424]	protein_coding	-0.1612	0.9385	-0.1379	0.9995	-0.1506	0.9011
ENSG00000096968	JAK2	Janus kinase 2 [Source:HGNC Symbol;Acc:HGNC:6192]	protein_coding	0.1303	0.9338	0.153	0.9995	0.1672	0.841
ENSG00000096996	IL12RB1	interleukin 12 receptor subunit beta 1 [Source:HGNC Symbol;Acc:HGNC:5971]	protein_coding	0.219	0.8761	0.2369	0.9995	0.2646	0.7567
ENSG00000097007	ABL1	ABL proto-oncogene 1, non-receptor tyrosine kinase [Source:HGNC Symbol;Acc:HGNC:76]	protein_coding	0.06837	0.9765	0.0841	0.9995	0.05757	0.964
ENSG00000097021	ACOT7	acyl-CoA thioesterase 7 [Source:HGNC Symbol;Acc:HGNC:24157]	protein_coding	0.2345	0.8803	0.2506	0.9995	0.2661	0.747
ENSG00000097033	SH3GLB1	SH3 domain containing GRB2 like, endophilin B1 [Source:HGNC Symbol;Acc:HGNC:10833]	protein_coding	-0.1434	0.8939	-0.1216	0.9995	-0.1386	0.8283
ENSG00000097046	CDC7	cell division cycle 7 [Source:HGNC Symbol;Acc:HGNC:1745]	protein_coding	0.1453	0.9184	0.1686	0.9995	0.1622	0.8392
ENSG00000099139	PCSK5	proprotein convertase subtilisin/kexin type 5 [Source:HGNC Symbol;Acc:HGNC:8747]	protein_coding	-1.084	0.183	-1.061	0.2648	-0.8242	0.5641
ENSG00000099194	SCD	stearoyl-CoA desaturase [Source:HGNC Symbol;Acc:HGNC:10571]	protein_coding	-0.547	0.4054	-0.5297	0.6607	-0.5358	0.5641
ENSG00000099203	TMED1	transmembrane p24 trafficking protein 1 [Source:HGNC Symbol;Acc:HGNC:17291]	protein_coding	0.3383	0.729	0.3619	0.9995	0.3532	0.6786
ENSG00000099204	ABLIM1	actin binding LIM protein 1 [Source:HGNC Symbol;Acc:HGNC:78]	protein_coding	-0.4594	0.6074	-0.4391	0.9255	-0.4007	0.6786
ENSG00000099219	ERMP1	endoplasmic reticulum metallopeptidase 1 [Source:HGNC Symbol;Acc:HGNC:23703]	protein_coding	0.2689	0.7521	0.2925	0.9995	0.2547	0.703
ENSG00000099246	RAB18	RAB18, member RAS oncogene family [Source:HGNC Symbol;Acc:HGNC:14244]	protein_coding	-0.09093	0.9606	-0.06912	0.9995	-0.07382	0.938
ENSG00000099250	NRP1	neuropilin 1 [Source:HGNC Symbol;Acc:HGNC:8004]	protein_coding	-0.1809	0.8994	-0.163	0.9995	-0.2318	0.7805
ENSG00000099256	PRTFDC1	phosphoribosyl transferase domain containing 1 [Source:HGNC Symbol;Acc:HGNC:23333]	protein_coding	-0.1712	0.9405	-0.1559	0.9995	-0.1222	0.9354
ENSG00000099260	PALMD	palmdelphin [Source:HGNC Symbol;Acc:HGNC:15846]	protein_coding	-0.355	0.8831	-0.3346	0.9995	-0.2172	0.8837
ENSG00000099282	TSPAN15	tetraspanin 15 [Source:HGNC Symbol;Acc:HGNC:23298]	protein_coding	0.1914	0.9466	0.2086	0.9995	0.2944	0.8551
ENSG00000099284	MACROH2A2	macroH2A.2 histone [Source:HGNC Symbol;Acc:HGNC:14453]	protein_coding	0.02484	0.9903	0.03149	0.9995	0.1509	0.852
ENSG00000099290	WASHC2A	WASH complex subunit 2A [Source:HGNC Symbol;Acc:HGNC:23416]	protein_coding	-0.1831	0.905	-0.1628	0.9995	-0.2549	0.7841
ENSG00000099308	MAST3	microtubule associated serine/threonine kinase 3 [Source:HGNC Symbol;Acc:HGNC:19036]	protein_coding	0.2278	0.8612	0.2459	0.9995	0.2552	0.7429
ENSG00000099326	MZF1	myeloid zinc finger 1 [Source:HGNC Symbol;Acc:HGNC:13108]	protein_coding	0.07447	0.9481	0.09723	0.9995	0.07321	0.9121
ENSG00000099330	OCEL1	occludin/ELL domain containing 1 [Source:HGNC Symbol;Acc:HGNC:26221]	protein_coding	0.05786	0.9755	0.06843	0.9995	0.1418	0.8705
ENSG00000099331	MYO9B	myosin IXB [Source:HGNC Symbol;Acc:HGNC:7609]	protein_coding	0.2793	0.7791	0.2956	0.9995	0.2822	0.7262
ENSG00000099337	KCNK6	potassium two pore domain channel subfamily K member 6 [Source:HGNC Symbol;Acc:HGNC:6281]	protein_coding	0.0681	0.9549	0.08494	0.9995	0.05634	0.9372
ENSG00000099338	CATSPERG	cation channel sperm associated auxiliary subunit gamma [Source:HGNC Symbol;Acc:HGNC:25243]	protein_coding	-0.2581	0.9385	-0.2326	0.9995	-0.2705	0.9005
ENSG00000099341	PSMD8	proteasome 26S subunit, non-ATPase 8 [Source:HGNC Symbol;Acc:HGNC:9566]	protein_coding	0.128	0.8965	0.1464	0.9995	0.1886	0.7648
ENSG00000099364	FBXL19	F-box and leucine rich repeat protein 19 [Source:HGNC Symbol;Acc:HGNC:25300]	protein_coding	0.4541	0.6601	0.4688	0.9263	0.554	0.5582
ENSG00000099365	STX1B	syntaxin 1B [Source:HGNC Symbol;Acc:HGNC:18539]	protein_coding	0.278	0.9107	0.2913	0.9995	0.4169	0.7837
ENSG00000099377	HSD3B7	hydroxy-delta-5-steroid dehydrogenase, 3 beta- and steroid delta-isomerase 7 [Source:HGNC Symbol;Acc:HGNC:18324]	protein_coding	0.5647	0.5693	0.5794	0.7526	0.6073	0.5651
ENSG00000099381	SETD1A	SET domain containing 1A, histone lysine methyltransferase [Source:HGNC Symbol;Acc:HGNC:29010]	protein_coding	0.2364	0.8532	0.2516	0.9995	0.2927	0.703
ENSG00000099385	BCL7C	BAF chromatin remodeling complex subunit BCL7C [Source:HGNC Symbol;Acc:HGNC:1006]	protein_coding	0.04815	0.977	0.0661	0.9995	0.05999	0.9482
ENSG00000099622	CIRBP	cold inducible RNA binding protein [Source:HGNC Symbol;Acc:HGNC:1982]	protein_coding	-0.0765	0.9212	-0.059	0.9995	-0.079	0.8947
ENSG00000099624	ATP5F1D	ATP synthase F1 subunit delta [Source:HGNC Symbol;Acc:HGNC:837]	protein_coding	0.1948	0.8966	0.2103	0.9995	0.2081	0.8272
ENSG00000099625	CBARP	CACN subunit beta associated regulatory protein [Source:HGNC Symbol;Acc:HGNC:28617]	protein_coding	-0.263	0.9385	-0.2465	0.9995	-0.001475	0.9993
ENSG00000099715	PCDH11Y	protocadherin 11 Y-linked [Source:HGNC Symbol;Acc:HGNC:15813]	protein_coding	0.4913	0.7174	0.5043	0.9995	0.6247	0.5687
ENSG00000099725	PRKY	protein kinase Y-linked (pseudogene) [Source:HGNC Symbol;Acc:HGNC:9444]	protein_coding	-0.1882	0.9843	-0.1585	0.9995	0.6747	0.9383
ENSG00000099783	HNRNPM	heterogeneous nuclear ribonucleoprotein M [Source:HGNC Symbol;Acc:HGNC:5046]	protein_coding	0.2018	0.8412	0.2184	0.9995	0.1528	0.8272
ENSG00000099785	MARCHF2	membrane associated ring-CH-type finger 2 [Source:HGNC Symbol;Acc:HGNC:28038]	protein_coding	-0.02148	0.9904	-0.003917	0.9996	0.008032	0.9938
ENSG00000099795	NDUFB7	NADH:ubiquinone oxidoreductase subunit B7 [Source:HGNC Symbol;Acc:HGNC:7702]	protein_coding	0.03263	0.9855	0.05	0.9995	0.0901	0.9244
ENSG00000099797	TECR	trans-2,3-enoyl-CoA reductase [Source:HGNC Symbol;Acc:HGNC:4551]	protein_coding	-0.2569	0.8532	-0.2411	0.9995	-0.2099	0.8148
ENSG00000099800	TIMM13	translocase of inner mitochondrial membrane 13 [Source:HGNC Symbol;Acc:HGNC:11816]	protein_coding	0.2039	0.8725	0.2211	0.9995	0.2445	0.7576
ENSG00000099804	CDC34	cell division cycle 34 [Source:HGNC Symbol;Acc:HGNC:1734]	protein_coding	0.1616	0.8874	0.179	0.9995	0.1969	0.7746
ENSG00000099812	MISP	mitotic spindle positioning [Source:HGNC Symbol;Acc:HGNC:27000]	protein_coding	0.5461	0.9466	0.6262	0.9995	1.695	0.6307
ENSG00000099814	CEP170B	centrosomal protein 170B [Source:HGNC Symbol;Acc:HGNC:20362]	protein_coding	0.1961	0.921	0.2132	0.9995	0.2008	0.8528
ENSG00000099817	POLR2E	RNA polymerase II subunit E [Source:HGNC Symbol;Acc:HGNC:9192]	protein_coding	0.06848	0.963	0.08411	0.9995	0.06353	0.9454
ENSG00000099821	POLRMT	RNA polymerase mitochondrial [Source:HGNC Symbol;Acc:HGNC:9200]	protein_coding	0.01463	0.9946	0.03184	0.9995	0.02151	0.9831
ENSG00000099822	HCN2	hyperpolarization activated cyclic nucleotide gated potassium and sodium channel 2 [Source:HGNC Symbol;Acc:HGNC:4846]	protein_coding	-0.1858	0.9551	-0.1565	0.9995	-0.2397	0.9037
ENSG00000099840	IZUMO4	IZUMO family member 4 [Source:HGNC Symbol;Acc:HGNC:26950]	protein_coding	-0.08321	0.9755	-0.06476	0.9995	0.01128	0.9938
ENSG00000099849	RASSF7	Ras association domain family member 7 [Source:HGNC Symbol;Acc:HGNC:1166]	protein_coding	0.07904	0.97	0.09348	0.9995	0.03045	0.9803
ENSG00000099860	GADD45B	growth arrest and DNA damage inducible beta [Source:HGNC Symbol;Acc:HGNC:4096]	protein_coding	0.3453	0.865	0.3641	0.9995	0.4258	0.7411
ENSG00000099864	PALM	paralemmin [Source:HGNC Symbol;Acc:HGNC:8594]	protein_coding	-0.2579	0.9217	-0.2393	0.9995	0.1276	0.946
ENSG00000099875	MKNK2	MAPK interacting serine/threonine kinase 2 [Source:HGNC Symbol;Acc:HGNC:7111]	protein_coding	0.1307	0.9181	0.1461	0.9995	0.1304	0.8749
ENSG00000099889	ARVCF	ARVCF delta catenin family member [Source:HGNC Symbol;Acc:HGNC:728]	protein_coding	0.01464	0.9949	0.03881	0.9995	0.04333	0.9737
ENSG00000099899	TRMT2A	tRNA methyltransferase 2 homolog A [Source:HGNC Symbol;Acc:HGNC:24974]	protein_coding	0.2511	0.8089	0.269	0.9995	0.2713	0.7201
ENSG00000099901	RANBP1	RAN binding protein 1 [Source:HGNC Symbol;Acc:HGNC:9847]	protein_coding	0.1086	0.9269	0.128	0.9995	0.1199	0.8619
ENSG00000099904	ZDHHC8	zinc finger DHHC-type containing 8 [Source:HGNC Symbol;Acc:HGNC:18474]	protein_coding	0.03785	0.9831	0.05351	0.9995	0.1029	0.9095
ENSG00000099910	KLHL22	kelch like family member 22 [Source:HGNC Symbol;Acc:HGNC:25888]	protein_coding	-0.1503	0.8965	-0.1378	0.9995	-0.08836	0.899
ENSG00000099917	MED15	mediator complex subunit 15 [Source:HGNC Symbol;Acc:HGNC:14248]	protein_coding	0.3438	0.763	0.361	0.9995	0.3478	0.7036
ENSG00000099940	SNAP29	synaptosome associated protein 29 [Source:HGNC Symbol;Acc:HGNC:11133]	protein_coding	0.07642	0.923	0.09752	0.9995	0.09593	0.8443
ENSG00000099942	CRKL	CRK like proto-oncogene, adaptor protein [Source:HGNC Symbol;Acc:HGNC:2363]	protein_coding	0.1256	0.8653	0.1409	0.9995	0.1224	0.8272
ENSG00000099949	LZTR1	leucine zipper like transcription regulator 1 [Source:HGNC Symbol;Acc:HGNC:6742]	protein_coding	0.1903	0.8874	0.207	0.9995	0.2222	0.7748
ENSG00000099953	MMP11	matrix metallopeptidase 11 [Source:HGNC Symbol;Acc:HGNC:7157]	protein_coding	-1.91	0.008715	-1.899	0.007403	-1.956	0.3238
ENSG00000099956	SMARCB1	SWI/SNF related, matrix associated, actin dependent regulator of chromatin, subfamily b, member 1 [Source:HGNC Symbol;Acc:HGNC:11103]	protein_coding	0.13	0.9172	0.1452	0.9995	0.1324	0.8457
ENSG00000099958	DERL3	derlin 3 [Source:HGNC Symbol;Acc:HGNC:14236]	protein_coding	-0.5431	0.88	-0.5271	0.9995	-0.483	0.8528
ENSG00000099968	BCL2L13	BCL2 like 13 [Source:HGNC Symbol;Acc:HGNC:17164]	protein_coding	0.02244	0.9872	0.03714	0.9995	0.01431	0.9837
ENSG00000099985	OSM	oncostatin M [Source:HGNC Symbol;Acc:HGNC:8506]	protein_coding	0.7109	0.8937	0.7269	0.9995	0.8934	0.7855
ENSG00000099991	CABIN1	calcineurin binding protein 1 [Source:HGNC Symbol;Acc:HGNC:24187]	protein_coding	0.1233	0.9162	0.1409	0.9995	0.1104	0.8705
ENSG00000099992	TBC1D10A	TBC1 domain family member 10A [Source:HGNC Symbol;Acc:HGNC:23609]	protein_coding	-0.0955	0.97	-0.08024	0.9995	-0.0661	0.9656
ENSG00000099994	SUSD2	sushi domain containing 2 [Source:HGNC Symbol;Acc:HGNC:30667]	protein_coding	0.3712	0.923	0.3928	0.9995	0.7135	0.7931
ENSG00000099995	SF3A1	splicing factor 3a subunit 1 [Source:HGNC Symbol;Acc:HGNC:10765]	protein_coding	0.03734	0.9787	0.05395	0.9995	0.02587	0.9763
ENSG00000099998	GGT5	gamma-glutamyltransferase 5 [Source:HGNC Symbol;Acc:HGNC:4260]	protein_coding	0.2329	0.9338	0.2497	0.9995	0.1662	0.9325
ENSG00000099999	RNF215	ring finger protein 215 [Source:HGNC Symbol;Acc:HGNC:33434]	protein_coding	-0.06859	0.9661	-0.06323	0.9995	0.02599	0.979
ENSG00000100023	PPIL2	peptidylprolyl isomerase like 2 [Source:HGNC Symbol;Acc:HGNC:9261]	protein_coding	0.03498	0.9789	0.05271	0.9995	0.05129	0.9392
ENSG00000100024	UPB1	beta-ureidopropionase 1 [Source:HGNC Symbol;Acc:HGNC:16297]	protein_coding	-0.3434	0.8874	-0.317	0.9995	-0.345	0.7594
ENSG00000100027	YPEL1	yippee like 1 [Source:HGNC Symbol;Acc:HGNC:12845]	protein_coding	0.05282	0.9811	0.07845	0.9995	0.09032	0.9383
ENSG00000100029	PES1	pescadillo ribosomal biogenesis factor 1 [Source:HGNC Symbol;Acc:HGNC:8848]	protein_coding	0.1716	0.8874	0.1874	0.9995	0.1827	0.8067
ENSG00000100030	MAPK1	mitogen-activated protein kinase 1 [Source:HGNC Symbol;Acc:HGNC:6871]	protein_coding	-0.08874	0.9081	-0.06849	0.9995	-0.08606	0.8551
ENSG00000100034	PPM1F	protein phosphatase, Mg2+/Mn2+ dependent 1F [Source:HGNC Symbol;Acc:HGNC:19388]	protein_coding	0.001683	0.9992	0.01649	0.9995	0.03037	0.9734
ENSG00000100036	SLC35E4	solute carrier family 35 member E4 [Source:HGNC Symbol;Acc:HGNC:17058]	protein_coding	0.02469	0.9917	0.03798	0.9995	0.183	0.8768
ENSG00000100038	TOP3B	DNA topoisomerase III beta [Source:HGNC Symbol;Acc:HGNC:11993]	protein_coding	0.09078	0.9508	0.109	0.9995	0.1129	0.8837
ENSG00000100055	CYTH4	cytohesin 4 [Source:HGNC Symbol;Acc:HGNC:9505]	protein_coding	0.4821	0.2706	0.4997	0.6523	0.5022	0.5384
ENSG00000100056	ESS2	ess-2 splicing factor homolog [Source:HGNC Symbol;Acc:HGNC:16817]	protein_coding	0.2272	0.8597	0.2405	0.9995	0.3055	0.6972
ENSG00000100060	MFNG	MFNG O-fucosylpeptide 3-beta-N-acetylglucosaminyltransferase [Source:HGNC Symbol;Acc:HGNC:7038]	protein_coding	-0.009101	0.9953	0.009779	0.9996	0.006333	0.9944
ENSG00000100065	CARD10	caspase recruitment domain family member 10 [Source:HGNC Symbol;Acc:HGNC:16422]	protein_coding	0.4664	0.8451	0.4795	0.9995	0.6954	0.6586
ENSG00000100068	LRP5L	LDL receptor related protein 5 like [Source:HGNC Symbol;Acc:HGNC:25323]	protein_coding	0.3653	0.8168	0.3827	0.9995	0.1772	0.8813
ENSG00000100075	SLC25A1	solute carrier family 25 member 1 [Source:HGNC Symbol;Acc:HGNC:10979]	protein_coding	0.1484	0.9331	0.1626	0.9995	0.209	0.8325
ENSG00000100077	GRK3	G protein-coupled receptor kinase 3 [Source:HGNC Symbol;Acc:HGNC:290]	protein_coding	0.004271	0.9985	0.02247	0.9995	0.03198	0.9673
ENSG00000100078	PLA2G3	phospholipase A2 group III [Source:HGNC Symbol;Acc:HGNC:17934]	protein_coding	0.1351	0.9612	0.15	0.9995	0.08292	0.9606
ENSG00000100079	LGALS2	galectin 2 [Source:HGNC Symbol;Acc:HGNC:6562]	protein_coding	-0.2406	0.9246	-0.2178	0.9995	-0.2325	0.8989
ENSG00000100083	GGA1	golgi associated, gamma adaptin ear containing, ARF binding protein 1 [Source:HGNC Symbol;Acc:HGNC:17842]	protein_coding	0.1551	0.9187	0.1722	0.9995	0.2053	0.8288
ENSG00000100084	HIRA	histone cell cycle regulator [Source:HGNC Symbol;Acc:HGNC:4916]	protein_coding	0.4025	0.6416	0.4179	0.9728	0.476	0.5687
ENSG00000100092	SH3BP1	SH3 domain binding protein 1 [Source:HGNC Symbol;Acc:HGNC:10824]	protein_coding	0.7909	0.7294	0.8074	0.9642	0.8372	0.692
ENSG00000100097	LGALS1	galectin 1 [Source:HGNC Symbol;Acc:HGNC:6561]	protein_coding	0.2293	0.8882	0.2459	0.9995	0.3918	0.6786
ENSG00000100099	HPS4	HPS4 biogenesis of lysosomal organelles complex 3 subunit 2 [Source:HGNC Symbol;Acc:HGNC:15844]	protein_coding	-0.007496	0.9962	0.009544	0.9996	0.01112	0.9904
ENSG00000100100	PIK3IP1	phosphoinositide-3-kinase interacting protein 1 [Source:HGNC Symbol;Acc:HGNC:24942]	protein_coding	-0.5231	0.09031	-0.5041	0.4762	-0.4995	0.4979
ENSG00000100104	SRRD	SRR1 domain containing [Source:HGNC Symbol;Acc:HGNC:33910]	protein_coding	-0.3196	0.7836	-0.2929	0.9995	-0.3	0.7145
ENSG00000100105	PATZ1	POZ/BTB and AT hook containing zinc finger 1 [Source:HGNC Symbol;Acc:HGNC:13071]	protein_coding	0.08124	0.9464	0.1015	0.9995	0.09971	0.88
ENSG00000100106	TRIOBP	TRIO and F-actin binding protein [Source:HGNC Symbol;Acc:HGNC:17009]	protein_coding	0.3	0.775	0.3171	0.9995	0.3007	0.6997
ENSG00000100109	TFIP11	tuftelin interacting protein 11 [Source:HGNC Symbol;Acc:HGNC:17165]	protein_coding	0.05914	0.9735	0.07463	0.9995	0.1352	0.8694
ENSG00000100116	GCAT	glycine C-acetyltransferase [Source:HGNC Symbol;Acc:HGNC:4188]	protein_coding	-0.6599	0.6743	-0.6468	0.9779	-0.3752	0.7788
ENSG00000100122	CRYBB1	crystallin beta B1 [Source:HGNC Symbol;Acc:HGNC:2397]	protein_coding	-0.3137	0.9217	-0.3008	0.9995	-0.04584	0.9834
ENSG00000100124	ANKRD54	ankyrin repeat domain 54 [Source:HGNC Symbol;Acc:HGNC:25185]	protein_coding	-0.01358	0.9929	0.008961	0.9996	-0.02722	0.975
ENSG00000100129	EIF3L	eukaryotic translation initiation factor 3 subunit L [Source:HGNC Symbol;Acc:HGNC:18138]	protein_coding	-0.3661	0.6105	-0.3454	0.9995	-0.2438	0.7393
ENSG00000100138	SNU13	small nuclear ribonucleoprotein 13 [Source:HGNC Symbol;Acc:HGNC:7819]	protein_coding	0.02227	0.9872	0.04367	0.9995	0.0516	0.9405
ENSG00000100139	MICALL1	MICAL like 1 [Source:HGNC Symbol;Acc:HGNC:29804]	protein_coding	0.153	0.9315	0.169	0.9995	0.1584	0.8626
ENSG00000100142	POLR2F	RNA polymerase II subunit F [Source:HGNC Symbol;Acc:HGNC:9193]	protein_coding	0.04369	0.9787	0.06331	0.9995	0.05763	0.9414
ENSG00000100147	CCDC134	coiled-coil domain containing 134 [Source:HGNC Symbol;Acc:HGNC:26185]	protein_coding	0.1197	0.9598	0.1312	0.9995	0.2457	0.8247
ENSG00000100151	PICK1	protein interacting with PRKCA 1 [Source:HGNC Symbol;Acc:HGNC:9394]	protein_coding	-0.06138	0.9612	-0.04503	0.9995	-0.02719	0.974
ENSG00000100154	TTC28	tetratricopeptide repeat domain 28 [Source:HGNC Symbol;Acc:HGNC:29179]	protein_coding	-0.216	0.8653	-0.1985	0.9995	-0.1431	0.8447
ENSG00000100162	CENPM	centromere protein M [Source:HGNC Symbol;Acc:HGNC:18352]	protein_coding	0.4791	0.6449	0.5026	0.9255	0.4237	0.6858
ENSG00000100167	SEPTIN3	septin 3 [Source:HGNC Symbol;Acc:HGNC:10750]	protein_coding	-0.03999	0.991	-0.02218	0.9996	0.06534	0.9758
ENSG00000100170	SLC5A1	solute carrier family 5 member 1 [Source:HGNC Symbol;Acc:HGNC:11036]	protein_coding	-0.4263	0.889	-0.3987	0.9995	-0.8095	0.6786
ENSG00000100196	KDELR3	KDEL endoplasmic reticulum protein retention receptor 3 [Source:HGNC Symbol;Acc:HGNC:6306]	protein_coding	-0.6598	0.5125	-0.6434	0.6645	-0.6617	0.6031
ENSG00000100197	CYP2D6	cytochrome P450 family 2 subfamily D member 6 [Source:HGNC Symbol;Acc:HGNC:2625]	protein_coding	0.3698	0.8965	0.4086	0.9995	0.1311	0.9381
ENSG00000100201	DDX17	DEAD-box helicase 17 [Source:HGNC Symbol;Acc:HGNC:2740]	protein_coding	-0.1151	0.9065	-0.09487	0.9995	-0.02678	0.9761
ENSG00000100206	DMC1	DNA meiotic recombinase 1 [Source:HGNC Symbol;Acc:HGNC:2927]	protein_coding	0.07724	0.9805	0.1033	0.9995	0.04778	0.979
ENSG00000100207	TCF20	transcription factor 20 [Source:HGNC Symbol;Acc:HGNC:11631]	protein_coding	0.008199	0.9953	0.02455	0.9995	0.002814	0.9971
ENSG00000100209	HSCB	HscB mitochondrial iron-sulfur cluster cochaperone [Source:HGNC Symbol;Acc:HGNC:28913]	protein_coding	0.1378	0.9181	0.1632	0.9995	0.1249	0.8636
ENSG00000100211	CBY1	chibby family member 1, beta catenin antagonist [Source:HGNC Symbol;Acc:HGNC:1307]	protein_coding	-0.1918	0.8499	-0.1681	0.9995	-0.1968	0.7562
ENSG00000100216	TOMM22	translocase of outer mitochondrial membrane 22 [Source:HGNC Symbol;Acc:HGNC:18002]	protein_coding	-0.07655	0.9466	-0.05619	0.9995	-0.05173	0.9426
ENSG00000100219	XBP1	X-box binding protein 1 [Source:HGNC Symbol;Acc:HGNC:12801]	protein_coding	-0.4856	0.8744	-0.4677	0.9995	-0.09097	0.9764
ENSG00000100220	RTCB	RNA 2',3'-cyclic phosphate and 5'-OH ligase [Source:HGNC Symbol;Acc:HGNC:26935]	protein_coding	-0.01394	0.9908	0.00644	0.9996	-0.01495	0.9834
ENSG00000100221	JOSD1	Josephin domain containing 1 [Source:HGNC Symbol;Acc:HGNC:28953]	protein_coding	0.1835	0.8565	0.1996	0.9995	0.1709	0.7899
ENSG00000100225	FBXO7	F-box protein 7 [Source:HGNC Symbol;Acc:HGNC:13586]	protein_coding	0.1948	0.7424	0.2122	0.9995	0.1654	0.7317
ENSG00000100226	GTPBP1	GTP binding protein 1 [Source:HGNC Symbol;Acc:HGNC:4669]	protein_coding	0.2214	0.8538	0.2386	0.9995	0.2004	0.7899
ENSG00000100227	POLDIP3	DNA polymerase delta interacting protein 3 [Source:HGNC Symbol;Acc:HGNC:23782]	protein_coding	0.2426	0.7127	0.2588	0.9995	0.2344	0.7088
ENSG00000100228	RAB36	RAB36, member RAS oncogene family [Source:HGNC Symbol;Acc:HGNC:9775]	protein_coding	-0.2195	0.9378	-0.2048	0.9995	-0.03075	0.989
ENSG00000100239	PPP6R2	protein phosphatase 6 regulatory subunit 2 [Source:HGNC Symbol;Acc:HGNC:19253]	protein_coding	0.08616	0.95	0.103	0.9995	0.1096	0.8837
ENSG00000100241	SBF1	SET binding factor 1 [Source:HGNC Symbol;Acc:HGNC:10542]	protein_coding	0.2978	0.7723	0.3141	0.9995	0.2963	0.7234
ENSG00000100242	SUN2	Sad1 and UNC84 domain containing 2 [Source:HGNC Symbol;Acc:HGNC:14210]	protein_coding	0.1256	0.9217	0.1417	0.9995	0.1143	0.8837
ENSG00000100243	CYB5R3	cytochrome b5 reductase 3 [Source:HGNC Symbol;Acc:HGNC:2873]	protein_coding	0.09816	0.9624	0.1144	0.9995	-0.007476	0.9952
ENSG00000100258	LMF2	lipase maturation factor 2 [Source:HGNC Symbol;Acc:HGNC:25096]	protein_coding	0.2852	0.8012	0.3007	0.9995	0.2825	0.738
ENSG00000100263	RHBDD3	rhomboid domain containing 3 [Source:HGNC Symbol;Acc:HGNC:1308]	protein_coding	0.281	0.7424	0.2993	0.9995	0.3087	0.6786
ENSG00000100266	PACSIN2	protein kinase C and casein kinase substrate in neurons 2 [Source:HGNC Symbol;Acc:HGNC:8571]	protein_coding	0.1256	0.924	0.1422	0.9995	0.1162	0.8813
ENSG00000100271	TTLL1	tubulin tyrosine ligase like 1 [Source:HGNC Symbol;Acc:HGNC:1312]	protein_coding	-0.153	0.9217	-0.1462	0.9995	-0.01892	0.9858
ENSG00000100276	RASL10A	RAS like family 10 member A [Source:HGNC Symbol;Acc:HGNC:16954]	protein_coding	0.192	0.9661	0.2123	0.9995	0.2517	0.8969
ENSG00000100280	AP1B1	adaptor related protein complex 1 subunit beta 1 [Source:HGNC Symbol;Acc:HGNC:554]	protein_coding	0.1035	0.9365	0.1197	0.9995	0.08133	0.9232
ENSG00000100281	HMGXB4	HMG-box containing 4 [Source:HGNC Symbol;Acc:HGNC:5003]	protein_coding	-0.03177	0.9795	-0.02289	0.9995	0.01701	0.9803
ENSG00000100284	TOM1	target of myb1 membrane trafficking protein [Source:HGNC Symbol;Acc:HGNC:11982]	protein_coding	0.1329	0.9341	0.149	0.9995	0.1689	0.8457
ENSG00000100285	NEFH	neurofilament heavy [Source:HGNC Symbol;Acc:HGNC:7737]	protein_coding	-0.03383	0.9932	-0.01675	0.9996	0.2354	0.9135
ENSG00000100288	CHKB	choline kinase beta [Source:HGNC Symbol;Acc:HGNC:1938]	protein_coding	-0.00817	0.9985	0.02058	0.9996	0.004085	0.9976
ENSG00000100290	BIK	BCL2 interacting killer [Source:HGNC Symbol;Acc:HGNC:1051]	protein_coding	0.2321	0.9289	0.2467	0.9995	0.4796	0.7575
ENSG00000100292	HMOX1	heme oxygenase 1 [Source:HGNC Symbol;Acc:HGNC:5013]	protein_coding	0.1314	0.9387	0.1483	0.9995	0.08488	0.9405
ENSG00000100294	MCAT	malonyl-CoA-acyl carrier protein transacylase [Source:HGNC Symbol;Acc:HGNC:29622]	protein_coding	0.05033	0.9764	0.06604	0.9995	0.1202	0.8694
ENSG00000100296	THOC5	THO complex 5 [Source:HGNC Symbol;Acc:HGNC:19074]	protein_coding	-0.01184	0.9909	-0.0002985	0.9996	0.01392	0.9826
ENSG00000100297	MCM5	minichromosome maintenance complex component 5 [Source:HGNC Symbol;Acc:HGNC:6948]	protein_coding	0.2438	0.8497	0.2599	0.9995	0.2599	0.7423
ENSG00000100298	APOBEC3H	apolipoprotein B mRNA editing enzyme catalytic subunit 3H [Source:HGNC Symbol;Acc:HGNC:24100]	protein_coding	0.5946	0.6074	0.6079	0.9233	0.8063	0.5349
ENSG00000100299	ARSA	arylsulfatase A [Source:HGNC Symbol;Acc:HGNC:713]	protein_coding	6.979e-05	0.9999	0.01474	0.9996	0.02942	0.979
ENSG00000100300	TSPO	translocator protein [Source:HGNC Symbol;Acc:HGNC:1158]	protein_coding	0.0407	0.9831	0.0566	0.9995	0.09541	0.9329
ENSG00000100302	RASD2	RASD family member 2 [Source:HGNC Symbol;Acc:HGNC:18229]	protein_coding	-0.9453	0.7631	-0.9222	0.9995	-0.6055	0.8272
ENSG00000100304	TTLL12	tubulin tyrosine ligase like 12 [Source:HGNC Symbol;Acc:HGNC:28974]	protein_coding	-0.03029	0.9872	-0.01454	0.9996	0.01704	0.9876
ENSG00000100307	CBX7	chromobox 7 [Source:HGNC Symbol;Acc:HGNC:1557]	protein_coding	-0.303	0.8199	-0.2852	0.9995	-0.2902	0.7552
ENSG00000100311	PDGFB	platelet derived growth factor subunit B [Source:HGNC Symbol;Acc:HGNC:8800]	protein_coding	-0.1312	0.9492	-0.1148	0.9995	-0.01476	0.9923
ENSG00000100316	RPL3	ribosomal protein L3 [Source:HGNC Symbol;Acc:HGNC:10332]	protein_coding	-0.3908	0.3816	-0.3717	0.9995	-0.1605	0.8114
ENSG00000100319	ZMAT5	zinc finger matrin-type 5 [Source:HGNC Symbol;Acc:HGNC:28046]	protein_coding	-0.1113	0.9461	-0.08608	0.9995	-0.1763	0.841
ENSG00000100320	RBFOX2	RNA binding fox-1 homolog 2 [Source:HGNC Symbol;Acc:HGNC:9906]	protein_coding	-0.2054	0.8532	-0.1889	0.9995	-0.2361	0.7218
ENSG00000100321	SYNGR1	synaptogyrin 1 [Source:HGNC Symbol;Acc:HGNC:11498]	protein_coding	-0.6045	0.6376	-0.5859	0.9263	-0.5742	0.6786
ENSG00000100324	TAB1	TGF-beta activated kinase 1 (MAP3K7) binding protein 1 [Source:HGNC Symbol;Acc:HGNC:18157]	protein_coding	0.02358	0.9883	0.04012	0.9995	0.05615	0.9434
ENSG00000100325	ASCC2	activating signal cointegrator 1 complex subunit 2 [Source:HGNC Symbol;Acc:HGNC:24103]	protein_coding	0.0546	0.9661	0.07102	0.9995	0.06052	0.9363
ENSG00000100330	MTMR3	myotubularin related protein 3 [Source:HGNC Symbol;Acc:HGNC:7451]	protein_coding	0.05925	0.9466	0.07356	0.9995	0.05476	0.9161
ENSG00000100335	MIEF1	mitochondrial elongation factor 1 [Source:HGNC Symbol;Acc:HGNC:25979]	protein_coding	0.01017	0.9917	0.02381	0.9995	0.01211	0.9831
ENSG00000100336	APOL4	apolipoprotein L4 [Source:HGNC Symbol;Acc:HGNC:14867]	protein_coding	-0.3378	0.8874	-0.3149	0.9995	-0.3959	0.7715
ENSG00000100342	APOL1	apolipoprotein L1 [Source:HGNC Symbol;Acc:HGNC:618]	protein_coding	0.2612	0.8951	0.2798	0.9995	0.2437	0.841
ENSG00000100344	PNPLA3	patatin like phospholipase domain containing 3 [Source:HGNC Symbol;Acc:HGNC:18590]	protein_coding	-0.5305	0.8742	-0.5074	0.9995	-0.5227	0.7788
ENSG00000100345	MYH9	myosin heavy chain 9 [Source:HGNC Symbol;Acc:HGNC:7579]	protein_coding	0.1007	0.9643	0.1166	0.9995	0.1132	0.9397
ENSG00000100346	CACNA1I	calcium voltage-gated channel subunit alpha1 I [Source:HGNC Symbol;Acc:HGNC:1396]	protein_coding	-0.2354	0.9606	-0.2161	0.9995	-0.4495	0.8463
ENSG00000100347	SAMM50	SAMM50 sorting and assembly machinery component [Source:HGNC Symbol;Acc:HGNC:24276]	protein_coding	-0.09717	0.9143	-0.08054	0.9995	-0.09322	0.8661
ENSG00000100348	TXN2	thioredoxin 2 [Source:HGNC Symbol;Acc:HGNC:17772]	protein_coding	0.01641	0.9896	0.03442	0.9995	0.0404	0.9546
ENSG00000100350	FOXRED2	FAD dependent oxidoreductase domain containing 2 [Source:HGNC Symbol;Acc:HGNC:26264]	protein_coding	-0.2443	0.8461	-0.2246	0.9995	-0.1864	0.8138
ENSG00000100351	GRAP2	GRB2 related adaptor protein 2 [Source:HGNC Symbol;Acc:HGNC:4563]	protein_coding	0.03049	0.9896	0.0499	0.9995	0.007301	0.995
ENSG00000100353	EIF3D	eukaryotic translation initiation factor 3 subunit D [Source:HGNC Symbol;Acc:HGNC:3278]	protein_coding	-0.02863	0.9686	-0.009708	0.9996	0.007042	0.9919
ENSG00000100354	TNRC6B	trinucleotide repeat containing adaptor 6B [Source:HGNC Symbol;Acc:HGNC:29190]	protein_coding	-0.2284	0.7531	-0.2103	0.9995	-0.2136	0.7195
ENSG00000100359	SGSM3	small G protein signaling modulator 3 [Source:HGNC Symbol;Acc:HGNC:25228]	protein_coding	0.7383	0.763	0.7466	0.9995	0.7466	0.6933
ENSG00000100360	IFT27	intraflagellar transport 27 [Source:HGNC Symbol;Acc:HGNC:18626]	protein_coding	0.1107	0.9297	0.1335	0.9995	0.08377	0.91
ENSG00000100364	KIAA0930	KIAA0930 [Source:HGNC Symbol;Acc:HGNC:1314]	protein_coding	-0.06837	0.9606	-0.05322	0.9995	-0.07991	0.9274
ENSG00000100365	NCF4	neutrophil cytosolic factor 4 [Source:HGNC Symbol;Acc:HGNC:7662]	protein_coding	0.08551	0.9349	0.1027	0.9995	0.09405	0.879
ENSG00000100368	CSF2RB	colony stimulating factor 2 receptor beta common subunit [Source:HGNC Symbol;Acc:HGNC:2436]	protein_coding	0.3825	0.8261	0.4025	0.9995	0.379	0.751
ENSG00000100372	SLC25A17	solute carrier family 25 member 17 [Source:HGNC Symbol;Acc:HGNC:10987]	protein_coding	0.03311	0.9827	0.05577	0.9995	0.02197	0.979
ENSG00000100373	UPK3A	uroplakin 3A [Source:HGNC Symbol;Acc:HGNC:12580]	protein_coding	-0.3331	0.944	-0.3188	0.9995	0.08402	0.979
ENSG00000100376	FAM118A	family with sequence similarity 118 member A [Source:HGNC Symbol;Acc:HGNC:1313]	protein_coding	0.08668	0.9345	0.09981	0.9995	0.1238	0.8392
ENSG00000100379	KCTD17	potassium channel tetramerization domain containing 17 [Source:HGNC Symbol;Acc:HGNC:25705]	protein_coding	0.3529	0.7424	0.3696	0.9995	0.4018	0.6714
ENSG00000100380	ST13	ST13 Hsp70 interacting protein [Source:HGNC Symbol;Acc:HGNC:11343]	protein_coding	-0.2841	0.6468	-0.2626	0.9995	-0.2914	0.6778
ENSG00000100385	IL2RB	interleukin 2 receptor subunit beta [Source:HGNC Symbol;Acc:HGNC:6009]	protein_coding	0.8569	0.183	0.8736	0.2209	0.894	0.5217
ENSG00000100387	RBX1	ring-box 1 [Source:HGNC Symbol;Acc:HGNC:9928]	protein_coding	0.08613	0.9606	0.1073	0.9995	0.1363	0.8761
ENSG00000100393	EP300	E1A binding protein p300 [Source:HGNC Symbol;Acc:HGNC:3373]	protein_coding	0.06189	0.9612	0.07882	0.9995	0.05419	0.9437
ENSG00000100395	L3MBTL2	L3MBTL histone methyl-lysine binding protein 2 [Source:HGNC Symbol;Acc:HGNC:18594]	protein_coding	0.203	0.8594	0.2192	0.9995	0.2376	0.7345
ENSG00000100401	RANGAP1	Ran GTPase activating protein 1 [Source:HGNC Symbol;Acc:HGNC:9854]	protein_coding	0.3118	0.7467	0.3279	0.9995	0.279	0.7226
ENSG00000100403	ZC3H7B	zinc finger CCCH-type containing 7B [Source:HGNC Symbol;Acc:HGNC:30869]	protein_coding	0.1166	0.938	0.1328	0.9995	0.09981	0.9135
ENSG00000100410	PHF5A	PHD finger protein 5A [Source:HGNC Symbol;Acc:HGNC:18000]	protein_coding	0.02952	0.988	0.04893	0.9995	0.03404	0.9764
ENSG00000100412	ACO2	aconitase 2 [Source:HGNC Symbol;Acc:HGNC:118]	protein_coding	-0.007338	0.9962	0.008822	0.9996	0.01153	0.9904
ENSG00000100413	POLR3H	RNA polymerase III subunit H [Source:HGNC Symbol;Acc:HGNC:30349]	protein_coding	-0.0997	0.9438	-0.0864	0.9995	-0.01881	0.983
ENSG00000100416	TRMU	tRNA 5-methylaminomethyl-2-thiouridylate methyltransferase [Source:HGNC Symbol;Acc:HGNC:25481]	protein_coding	0.06697	0.9612	0.08604	0.9995	0.0946	0.9053
ENSG00000100417	PMM1	phosphomannomutase 1 [Source:HGNC Symbol;Acc:HGNC:9114]	protein_coding	-0.001995	0.9992	0.0262	0.9995	-0.008684	0.9924
ENSG00000100418	DESI1	desumoylating isopeptidase 1 [Source:HGNC Symbol;Acc:HGNC:24577]	protein_coding	0.2261	0.6273	0.2423	0.9995	0.2416	0.6631
ENSG00000100422	CERK	ceramide kinase [Source:HGNC Symbol;Acc:HGNC:19256]	protein_coding	-0.03171	0.9765	-0.01314	0.9995	-0.03476	0.9548
ENSG00000100425	BRD1	bromodomain containing 1 [Source:HGNC Symbol;Acc:HGNC:1102]	protein_coding	-0.08474	0.9466	-0.06758	0.9995	-0.05596	0.9393
ENSG00000100426	ZBED4	zinc finger BED-type containing 4 [Source:HGNC Symbol;Acc:HGNC:20721]	protein_coding	-0.04019	0.9734	-0.02829	0.9995	-0.003088	0.9962
ENSG00000100427	MLC1	modulator of VRAC current 1 [Source:HGNC Symbol;Acc:HGNC:17082]	protein_coding	1.672	0.1218	1.677	0.1376	1.961	0.3708
ENSG00000100429	HDAC10	histone deacetylase 10 [Source:HGNC Symbol;Acc:HGNC:18128]	protein_coding	0.7779	0.7358	0.7885	0.9871	0.8298	0.6786
ENSG00000100433	KCNK10	potassium two pore domain channel subfamily K member 10 [Source:HGNC Symbol;Acc:HGNC:6273]	protein_coding	-0.536	0.8874	-0.5164	0.9995	-0.6359	0.7748
ENSG00000100439	ABHD4	abhydrolase domain containing 4 [Source:HGNC Symbol;Acc:HGNC:20154]	protein_coding	-0.02583	0.9904	-0.01046	0.9996	0.03604	0.9768
ENSG00000100441	KHNYN	KH and NYN domain containing [Source:HGNC Symbol;Acc:HGNC:20166]	protein_coding	0.007114	0.9962	0.02449	0.9995	0.006868	0.9932
ENSG00000100442	FKBP3	FKBP prolyl isomerase 3 [Source:HGNC Symbol;Acc:HGNC:3719]	protein_coding	-0.09881	0.9598	-0.078	0.9995	-0.1013	0.9201
ENSG00000100445	SDR39U1	short chain dehydrogenase/reductase family 39U member 1 [Source:HGNC Symbol;Acc:HGNC:20275]	protein_coding	-0.05221	0.9796	-0.01729	0.9996	-0.06097	0.9571
ENSG00000100448	CTSG	cathepsin G [Source:HGNC Symbol;Acc:HGNC:2532]	protein_coding	-0.8483	0.4312	-0.8306	0.5806	-0.9347	0.5422
ENSG00000100450	GZMH	granzyme H [Source:HGNC Symbol;Acc:HGNC:4710]	protein_coding	0.8678	0.6273	0.8945	0.627	1.01	0.6397
ENSG00000100453	GZMB	granzyme B [Source:HGNC Symbol;Acc:HGNC:4709]	protein_coding	1.785	0.005148	1.808	0.001265	1.988	0.3238
ENSG00000100461	RBM23	RNA binding motif protein 23 [Source:HGNC Symbol;Acc:HGNC:20155]	protein_coding	0.1168	0.8742	0.1297	0.9995	0.09476	0.8412
ENSG00000100462	PRMT5	protein arginine methyltransferase 5 [Source:HGNC Symbol;Acc:HGNC:10894]	protein_coding	0.1104	0.9217	0.1269	0.9995	0.1151	0.8638
ENSG00000100473	COCH	cochlin [Source:HGNC Symbol;Acc:HGNC:2180]	protein_coding	-0.7004	0.7572	-0.6794	0.9995	-0.6162	0.7125
ENSG00000100478	AP4S1	adaptor related protein complex 4 subunit sigma 1 [Source:HGNC Symbol;Acc:HGNC:575]	protein_coding	-0.2669	0.8874	-0.244	0.9995	-0.2951	0.8059
ENSG00000100479	POLE2	DNA polymerase epsilon 2, accessory subunit [Source:HGNC Symbol;Acc:HGNC:9178]	protein_coding	0.3076	0.8412	0.3323	0.9995	0.3088	0.745
ENSG00000100483	VCPKMT	valosin containing protein lysine methyltransferase [Source:HGNC Symbol;Acc:HGNC:20352]	protein_coding	-0.1847	0.9144	-0.1587	0.9995	-0.1096	0.9135
ENSG00000100485	SOS2	SOS Ras/Rho guanine nucleotide exchange factor 2 [Source:HGNC Symbol;Acc:HGNC:11188]	protein_coding	-0.01986	0.9893	-0.0005876	0.9996	0.008189	0.9924
ENSG00000100490	CDKL1	cyclin dependent kinase like 1 [Source:HGNC Symbol;Acc:HGNC:1781]	protein_coding	-0.09292	0.9628	-0.06094	0.9995	-0.01574	0.9905
ENSG00000100503	NIN	ninein [Source:HGNC Symbol;Acc:HGNC:14906]	protein_coding	-0.1512	0.8532	-0.1288	0.9995	-0.1426	0.7971
ENSG00000100504	PYGL	glycogen phosphorylase L [Source:HGNC Symbol;Acc:HGNC:9725]	protein_coding	0.09113	0.9466	0.1078	0.9995	0.04775	0.9519
ENSG00000100505	TRIM9	tripartite motif containing 9 [Source:HGNC Symbol;Acc:HGNC:16288]	protein_coding	0.2694	0.9462	0.29	0.9995	0.6614	0.703
ENSG00000100519	PSMC6	proteasome 26S subunit, ATPase 6 [Source:HGNC Symbol;Acc:HGNC:9553]	protein_coding	0.01055	0.9962	0.03243	0.9995	0.05392	0.9581
ENSG00000100522	GNPNAT1	glucosamine-phosphate N-acetyltransferase 1 [Source:HGNC Symbol;Acc:HGNC:19980]	protein_coding	-0.1372	0.924	-0.1166	0.9995	-0.1392	0.87
ENSG00000100523	DDHD1	DDHD domain containing 1 [Source:HGNC Symbol;Acc:HGNC:19714]	protein_coding	-0.1425	0.9091	-0.1201	0.9995	-0.1658	0.8194
ENSG00000100526	CDKN3	cyclin dependent kinase inhibitor 3 [Source:HGNC Symbol;Acc:HGNC:1791]	protein_coding	0.185	0.9359	0.2053	0.9995	0.1136	0.9397
ENSG00000100528	CNIH1	cornichon family AMPA receptor auxiliary protein 1 [Source:HGNC Symbol;Acc:HGNC:19431]	protein_coding	-0.2066	0.8965	-0.1853	0.9995	-0.1663	0.8625
ENSG00000100532	CGRRF1	cell growth regulator with ring finger domain 1 [Source:HGNC Symbol;Acc:HGNC:15528]	protein_coding	-0.02482	0.991	-0.001247	0.9996	-0.1096	0.9276
ENSG00000100554	ATP6V1D	ATPase H+ transporting V1 subunit D [Source:HGNC Symbol;Acc:HGNC:13527]	protein_coding	0.04987	0.9824	0.06958	0.9995	0.1135	0.9292
ENSG00000100558	PLEK2	pleckstrin 2 [Source:HGNC Symbol;Acc:HGNC:19238]	protein_coding	0.5341	0.8499	0.5434	0.9995	0.3736	0.8481
ENSG00000100564	PIGH	phosphatidylinositol glycan anchor biosynthesis class H [Source:HGNC Symbol;Acc:HGNC:8964]	protein_coding	-0.07399	0.9606	-0.0436	0.9995	-0.106	0.8825
ENSG00000100568	VTI1B	vesicle transport through interaction with t-SNAREs 1B [Source:HGNC Symbol;Acc:HGNC:17793]	protein_coding	0.003929	0.9985	0.0282	0.9995	0.008209	0.9924
ENSG00000100575	TIMM9	translocase of inner mitochondrial membrane 9 [Source:HGNC Symbol;Acc:HGNC:11819]	protein_coding	-0.04994	0.9805	-0.02779	0.9995	-0.002735	0.9977
ENSG00000100577	GSTZ1	glutathione S-transferase zeta 1 [Source:HGNC Symbol;Acc:HGNC:4643]	protein_coding	-0.1845	0.8606	-0.1646	0.9995	-0.1489	0.8272
ENSG00000100578	KIAA0586	KIAA0586 [Source:HGNC Symbol;Acc:HGNC:19960]	protein_coding	0.009707	0.9951	0.02971	0.9995	0.04687	0.9504
ENSG00000100580	TMED8	transmembrane p24 trafficking protein family member 8 [Source:HGNC Symbol;Acc:HGNC:18633]	protein_coding	0.07297	0.9495	0.0903	0.9995	0.1195	0.841
ENSG00000100591	AHSA1	activator of HSP90 ATPase activity 1 [Source:HGNC Symbol;Acc:HGNC:1189]	protein_coding	0.2259	0.7279	0.2447	0.9995	0.2386	0.703
ENSG00000100592	DAAM1	dishevelled associated activator of morphogenesis 1 [Source:HGNC Symbol;Acc:HGNC:18142]	protein_coding	-0.2194	0.8818	-0.1984	0.9995	-0.1934	0.826
ENSG00000100596	SPTLC2	serine palmitoyltransferase long chain base subunit 2 [Source:HGNC Symbol;Acc:HGNC:11278]	protein_coding	0.03039	0.9805	0.05166	0.9995	0.03523	0.957
ENSG00000100599		Ras and Rab interactor 3 [Source:NCBI gene;Acc:79890]	protein_coding	0.3645	0.8012	0.3812	0.9995	0.4141	0.6933
ENSG00000100600	LGMN	legumain [Source:HGNC Symbol;Acc:HGNC:9472]	protein_coding	0.2751	0.8838	0.2924	0.9995	0.2997	0.8078
ENSG00000100601	ALKBH1	alkB homolog 1, histone H2A dioxygenase [Source:HGNC Symbol;Acc:HGNC:17911]	protein_coding	0.1068	0.9256	0.1125	0.9995	0.1895	0.7788
ENSG00000100605	ITPK1	inositol-tetrakisphosphate 1-kinase [Source:HGNC Symbol;Acc:HGNC:6177]	protein_coding	0.2234	0.8845	0.2402	0.9995	0.2474	0.7764
ENSG00000100614	PPM1A	protein phosphatase, Mg2+/Mn2+ dependent 1A [Source:HGNC Symbol;Acc:HGNC:9275]	protein_coding	-0.1353	0.918	-0.1142	0.9995	-0.1091	0.8808
ENSG00000100625	SIX4	SIX homeobox 4 [Source:HGNC Symbol;Acc:HGNC:10890]	protein_coding	0.4578	0.889	0.4732	0.9995	0.3379	0.8397
ENSG00000100626	GALNT16	polypeptide N-acetylgalactosaminyltransferase 16 [Source:HGNC Symbol;Acc:HGNC:23233]	protein_coding	-1.342	0.6074	-1.322	0.7656	-0.9139	0.7558
ENSG00000100628	ASB2	ankyrin repeat and SOCS box containing 2 [Source:HGNC Symbol;Acc:HGNC:16012]	protein_coding	0.3887	0.8114	0.407	0.9995	0.5683	0.6714
ENSG00000100629	CEP128	centrosomal protein 128 [Source:HGNC Symbol;Acc:HGNC:20359]	protein_coding	-0.03025	0.9946	-0.01038	0.9996	0.04535	0.9837
ENSG00000100632	ERH	ERH mRNA splicing and mitosis factor [Source:HGNC Symbol;Acc:HGNC:3447]	protein_coding	0.1027	0.9466	0.1236	0.9995	0.1389	0.8671
ENSG00000100644	HIF1A	hypoxia inducible factor 1 subunit alpha [Source:HGNC Symbol;Acc:HGNC:4910]	protein_coding	-0.06248	0.9787	-0.04232	0.9995	-0.0546	0.9617
ENSG00000100647	SUSD6	sushi domain containing 6 [Source:HGNC Symbol;Acc:HGNC:19956]	protein_coding	0.1416	0.9181	0.1598	0.9995	0.08856	0.9135
ENSG00000100650	SRSF5	serine and arginine rich splicing factor 5 [Source:HGNC Symbol;Acc:HGNC:10787]	protein_coding	-0.1901	0.8151	-0.1695	0.9995	-0.1159	0.8452
ENSG00000100664	EIF5	eukaryotic translation initiation factor 5 [Source:HGNC Symbol;Acc:HGNC:3299]	protein_coding	-0.2018	0.8874	-0.1798	0.9995	-0.1502	0.8539
ENSG00000100697	DICER1	dicer 1, ribonuclease III [Source:HGNC Symbol;Acc:HGNC:17098]	protein_coding	-0.07883	0.9343	-0.05759	0.9995	-0.06915	0.8983
ENSG00000100711	ZFYVE21	zinc finger FYVE-type containing 21 [Source:HGNC Symbol;Acc:HGNC:20760]	protein_coding	-0.00625	0.9968	0.011	0.9996	0.02565	0.9758
ENSG00000100714	MTHFD1	methylenetetrahydrofolate dehydrogenase, cyclohydrolase and formyltetrahydrofolate synthetase 1 [Source:HGNC Symbol;Acc:HGNC:7432]	protein_coding	0.111	0.9378	0.1291	0.9995	0.1318	0.8661
ENSG00000100721	TCL1A	T cell leukemia/lymphoma 1A [Source:HGNC Symbol;Acc:HGNC:11648]	protein_coding	0.5462	0.8538	0.5604	0.9995	0.574	0.7746
ENSG00000100722	ZC3H14	zinc finger CCCH-type containing 14 [Source:HGNC Symbol;Acc:HGNC:20509]	protein_coding	-0.1152	0.923	-0.09446	0.9995	-0.1044	0.8842
ENSG00000100726	TELO2	telomere maintenance 2 [Source:HGNC Symbol;Acc:HGNC:29099]	protein_coding	0.1297	0.924	0.1473	0.9995	0.1626	0.841
[truncated: 11,508 more rows]

## Sheet: Biopsies GO
Table S4b. Gene ontology analyses of DE genes in biopsies from TF vs. Cured patients.
#category	term ID	term description	observed gene count	background gene count	strength	false discovery rate	matching proteins in your network (IDs)	matching proteins in your network (labels)
GO Process	GO:0006968	Cellular defense response	4	54	1.71	0.0107	9606.ENSP00000263863,9606.ENSP00000291890,9606.ENSP00000339634,9606.ENSP00000398568	GNLY,NCR1,KIR2DL4,PRF1
GO Process	GO:0072676	Lymphocyte migration	4	74	1.58	0.0163	9606.ENSP00000177694,9606.ENSP00000378118,9606.ENSP00000477908,9606.ENSP00000482259	TBX21,CCL8,CCL3,CCL4
InterPro	IPR000827	CC chemokine, conserved site	3	21	2	0.0351	9606.ENSP00000378118,9606.ENSP00000477908,9606.ENSP00000482259	CCL8,CCL3,CCL4
InterPro	IPR039809	Chemokine beta/gamma/delta	3	26	1.91	0.0351	9606.ENSP00000378118,9606.ENSP00000477908,9606.ENSP00000482259	CCL8,CCL3,CCL4
KEGG	hsa05332	Graft-versus-host disease	3	36	1.77	0.0039	9606.ENSP00000216341,9606.ENSP00000398568,9606.ENSP00000438038	GZMB,PRF1,KLRC1
KEGG	hsa04650	Natural killer cell mediated cytotoxicity	5	121	1.46	0.0003	9606.ENSP00000216341,9606.ENSP00000291890,9606.ENSP00000356906,9606.ENSP00000398568,9606.ENSP00000438038	GZMB,NCR1,SH2D1B,PRF1,KLRC1
KEGG	hsa04061	Viral protein interaction with cytokine and cytokine receptor	3	96	1.34	0.0419	9606.ENSP00000378118,9606.ENSP00000477908,9606.ENSP00000482259	CCL8,CCL3,CCL4
SMART	SM00199	Intercrine alpha family (small cytokine C-X-C) (chemokine CXC).	3	32	1.82	0.012	9606.ENSP00000378118,9606.ENSP00000477908,9606.ENSP00000482259	CCL8,CCL3,CCL4
STRING clusters	CL:19230	Granzyme-mediated apoptotic signaling pathway, and granulysin-like	3	6	2.54	0.00025	9606.ENSP00000216341,9606.ENSP00000263863,9606.ENSP00000398568	GZMB,GNLY,PRF1
STRING clusters	CL:18280	CCR1 chemokine receptor binding, and chemokine (C-C motif) ligand 5 binding	2	6	2.37	0.0498	9606.ENSP00000477908,9606.ENSP00000482259	CCL3,CCL4
STRING clusters	CL:19203	Mixed, incl. granzyme-mediated apoptotic signaling pathway, and regulation of cd8-positive, alpha-beta t cell differentiation	4	20	2.15	5.26e-05	9606.ENSP00000177694,9606.ENSP00000216341,9606.ENSP00000263863,9606.ENSP00000398568	TBX21,GZMB,GNLY,PRF1
STRING clusters	CL:19088	Mixed, incl. immunoregulatory interactions between a lymphoid and a non-lymphoid cell, and natural killer cell mediated immunity	6	79	1.72	8.83e-06	9606.ENSP00000177694,9606.ENSP00000216341,9606.ENSP00000263863,9606.ENSP00000356906,9606.ENSP00000398568,9606.ENSP00000438038	TBX21,GZMB,GNLY,SH2D1B,PRF1,KLRC1
TISSUES	BTO:0000289	Cytotoxic t-lymphocyte	2	15	1.97	0.0419	9606.ENSP00000259989,9606.ENSP00000398568	FGFBP2,PRF1
TISSUES	BTO:0000914	Natural killer cell	5	50	1.84	2.58e-05	9606.ENSP00000216341,9606.ENSP00000263863,9606.ENSP00000398568,9606.ENSP00000477908,9606.ENSP00000482259	GZMB,GNLY,PRF1,CCL3,CCL4
TISSUES	BTO:0000782	T-lymphocyte	5	255	1.14	0.0096	9606.ENSP00000177694,9606.ENSP00000259989,9606.ENSP00000398568,9606.ENSP00000477908,9606.ENSP00000482259	TBX21,FGFBP2,PRF1,CCL3,CCL4
UniProt Keywords	KW-0204	Cytolysis	2	14	2	0.0316	9606.ENSP00000216341,9606.ENSP00000398568	GZMB,PRF1
UniProt Keywords	KW-0340	Growth factor binding	2	20	1.84	0.0432	9606.ENSP00000233809,9606.ENSP00000259989	IGFBP2,FGFBP2
UniProt Keywords	KW-0145	Chemotaxis	3	95	1.34	0.0409	9606.ENSP00000378118,9606.ENSP00000477908,9606.ENSP00000482259	CCL8,CCL3,CCL4
UniProt Keywords	KW-0395	Inflammatory response	4	162	1.24	0.0196	9606.ENSP00000366682,9606.ENSP00000378118,9606.ENSP00000477908,9606.ENSP00000482259	IRG1,CCL8,CCL3,CCL4
WikiPathways	WP5092	Interactions of natural killer cells in pancreatic cancer	5	27	2.11	5.43e-07	9606.ENSP00000216341,9606.ENSP00000291890,9606.ENSP00000398568,9606.ENSP00000477908,9606.ENSP00000482259	GZMB,NCR1,PRF1,CCL3,CCL4
WikiPathways	WP4329	miRNAs involvement in the immune response in sepsis	3	37	1.75	0.0084	9606.ENSP00000216341,9606.ENSP00000477908,9606.ENSP00000482259	GZMB,CCL3,CCL4
TISSUES	BTO:0000775	Lymphocyte	7	648	0.88	0.0096	9606.ENSP00000177694,9606.ENSP00000216341,9606.ENSP00000259989,9606.ENSP00000263863,9606.ENSP00000398568,9606.ENSP00000477908,9606.ENSP00000482259	TBX21,GZMB,FGFBP2,GNLY,PRF1,CCL3,CCL4
TISSUES	BTO:0000751	Leukocyte	8	849	0.82	0.0088	9606.ENSP00000177694,9606.ENSP00000216341,9606.ENSP00000259989,9606.ENSP00000263863,9606.ENSP00000356906,9606.ENSP00000398568,9606.ENSP00000477908,9606.ENSP00000482259	TBX21,GZMB,FGFBP2,GNLY,SH2D1B,PRF1,CCL3,CCL4
GO Process	GO:0006952	Defense response	11	1296	0.77	0.0107	9606.ENSP00000216341,9606.ENSP00000263863,9606.ENSP00000278888,9606.ENSP00000291890,9606.ENSP00000339634,9606.ENSP00000356906,9606.ENSP00000366682,9606.ENSP00000378118,9606.ENSP00000398568,9606.ENSP00000477908,9606.ENSP00000482259	GZMB,GNLY,MS4A2,NCR1,KIR2DL4,SH2D1B,IRG1,CCL8,PRF1,CCL3,CCL4
GO Process	GO:0002682	Regulation of immune system process	11	1514	0.71	0.0163	9606.ENSP00000177694,9606.ENSP00000233809,9606.ENSP00000278888,9606.ENSP00000291890,9606.ENSP00000339634,9606.ENSP00000356906,9606.ENSP00000366682,9606.ENSP00000378118,9606.ENSP00000438038,9606.ENSP00000477908,9606.ENSP00000482259	TBX21,IGFBP2,MS4A2,NCR1,KIR2DL4,SH2D1B,IRG1,CCL8,KLRC1,CCL3,CCL4
TISSUES	BTO:0000753	Lymphoid tissue	10	1496	0.67	0.0096	9606.ENSP00000177694,9606.ENSP00000216341,9606.ENSP00000259989,9606.ENSP00000263863,9606.ENSP00000291890,9606.ENSP00000339634,9606.ENSP00000356906,9606.ENSP00000398568,9606.ENSP00000477908,9606.ENSP00000482259	TBX21,GZMB,FGFBP2,GNLY,NCR1,KIR2DL4,SH2D1B,PRF1,CCL3,CCL4
TISSUES	BTO:0000089	Blood	10	1675	0.62	0.0115	9606.ENSP00000177694,9606.ENSP00000216341,9606.ENSP00000259989,9606.ENSP00000263863,9606.ENSP00000291890,9606.ENSP00000356906,9606.ENSP00000398568,9606.ENSP00000438038,9606.ENSP00000477908,9606.ENSP00000482259	TBX21,GZMB,FGFBP2,GNLY,NCR1,SH2D1B,PRF1,KLRC1,CCL3,CCL4
UniProt Keywords	KW-0964	Secreted	10	1818	0.58	0.0224	9606.ENSP00000215743,9606.ENSP00000233809,9606.ENSP00000259989,9606.ENSP00000263863,9606.ENSP00000369071,9606.ENSP00000378118,9606.ENSP00000378957,9606.ENSP00000398568,9606.ENSP00000477908,9606.ENSP00000482259	MMP11,IGFBP2,FGFBP2,GNLY,POSTN,CCL8,MFAP4,PRF1,CCL3,CCL4
UniProt Keywords	KW-1015	Disulfide bond	17	3304	0.56	0.00016	9606.ENSP00000215743,9606.ENSP00000216341,9606.ENSP00000233809,9606.ENSP00000259056,9606.ENSP00000259989,9606.ENSP00000263863,9606.ENSP00000278888,9606.ENSP00000291890,9606.ENSP00000296046,9606.ENSP00000322460,9606.ENSP00000339634,9606.ENSP00000369071,9606.ENSP00000378118,9606.ENSP00000398568,9606.ENSP00000438038,9606.ENSP00000477908,9606.ENSP00000482259	MMP11,GZMB,IGFBP2,GALNT5,FGFBP2,GNLY,MS4A2,NCR1,CPA3,SCN4B,KIR2DL4,POSTN,CCL8,PRF1,KLRC1,CCL3,CCL4
UniProt Keywords	KW-0732	Signal	15	3233	0.51	0.0027	9606.ENSP00000215743,9606.ENSP00000216341,9606.ENSP00000233809,9606.ENSP00000259989,9606.ENSP00000263863,9606.ENSP00000291890,9606.ENSP00000296046,9606.ENSP00000322460,9606.ENSP00000339634,9606.ENSP00000369071,9606.ENSP00000378118,9606.ENSP00000378957,9606.ENSP00000398568,9606.ENSP00000477908,9606.ENSP00000482259	MMP11,GZMB,IGFBP2,FGFBP2,GNLY,NCR1,CPA3,SCN4B,KIR2DL4,POSTN,CCL8,MFAP4,PRF1,CCL3,CCL4
