# Supplementary material for: Innate biosignature of treatment failure in human cutaneous leishmaniasis
Source: Research Square preprint supplement (doi:10.21203/rs.3.rs-4271873/v1), 2024-05-02
Supplement: Supplementary file 8 [file bae816a930bf5a429d2682c1.xlsx]

## Sheet: Sheet1
Table S3. SVA analysis F-statistics
Both Clinics
SVA Loadings (F-statistic) for all samples
SV	Cell Type	Visit Number	Clinic	Donor
SV1	4.829	0.0006	0.0026	0.0703
SV2	14.464	0.0065	0	0.0442
SV3	0.193	0.002	0.2624	0.8186
SV4	0.0307	0.0197	0.4445	0.7556
SV5	0.003	0.0126	0.0705	0.5762
SVA Loadings (F-statistic) for Monocytes
SV	Visit Number	Clinic	Donor
SV1	0.004	0.1504	1.135
SV2	0.004	1.0583	1.2869
SV3	0.0054	0.0788	0.5436
SV4	0.0079	0.0006	2.7607
SVA Loadings (F-statistic) for Neutrophils
SV	Visit Number	Clinic	Donor
SV1	0.0319	0.0003	0.7005
SV2	0.0016	2.069	1.1963
SV3	0.9609	0.0083	0.4054
SV4	0.1932	0.0036	1.5591
SV5	0.009	0.0125	1.8071
SV6	0.0123	0.0086	0.871
SV7	0.0223	0.0211	1.0786
SVA Loadings (F-statistic) for Eosinophils
SV	Visit Number	Clinic	Donor
SV1	0.0146	0.3914	4.697
SV2	0.0055	0.0137	1.741
SV3	0.0514	0.0154	4.266
SV4	0.0201	0.4397	2.483
SV5	0.0008	0.0626	5.409
Tumaco Clinic Only
SVA Loadings (F-statistic) for Tumaco Samples
SV	Cell Type	Visit Number	Donor
SV1	3.0844	0.0049	0.1106
SV2	14.1218	0.0063	0.0901
SV3	0.4025	0.0046	0.5204
SV4	0.0006	0.0014	1.8831
SVA Loadings (F-statistic) for Tumaco Monocytes
SV	Visit Number	Donor
SV1	0.0054	1.006
SV2	0.0116	1.331
SV3	0.0134	4.791
SVA Loadings (F-statistic) for Tumaco Neutrophils
SV	Visit Number	Donor
SV1	0.0413	0.7055
SV2	0.0781	2.2791
SV3	0.086	1.3692
SV4	0.2334	3.3782
SV5	0.2988	1.0768
SVA Loadings (F-statistic) for Tumaco Eosinophils
SV	Visit Number	Donor
SV1	0.0142	4.983
SV2	0.0019	55.023
SV3	0.0338	35.037
