# Supplementary material for: Innate biosignature of treatment failure in human cutaneous leishmaniasis
Source: Research Square preprint supplement (doi:10.21203/rs.3.rs-4271873/v1), 2024-05-02
Supplement: Supplementary file 9 [file c128c51f001b76fa7119d480.xlsx]

## Sheet: Monocytes
Table S5a: Differential gene expression of monocytes from cure vs TF patients. Contrast numerator: TF. Contrast denominator: Cure.
ensemblgeneid	hgncsymbol	description	deseq_logfc	deseq_adjp	edger_logfc	edger_adjp	limma_logfc	limma_adjp
ENSG00000212993	POU5F1B	POU class 5 homeobox 1B [Source:HGNC Symbol;Acc:HGNC:9223]	5.448	1.952e-06	5.459	6.153e-05	2.548	0.1677
ENSG00000089012	SIRPG	signal regulatory protein gamma [Source:HGNC Symbol;Acc:HGNC:15757]	4.574	7.258e-06	4.568	2.486e-05	0.6939	0.6989
ENSG00000074803	SLC12A1	solute carrier family 12 member 1 [Source:HGNC Symbol;Acc:HGNC:10910]	4.141	0.001008	4.137	0.004297	0.8952	0.5065
ENSG00000165949	IFI27	interferon alpha inducible protein 27 [Source:HGNC Symbol;Acc:HGNC:5397]	3.352	0.0006823	3.367	0.0008803	0.7334	0.6961
ENSG00000165164	CFAP47	cilia and flagella associated protein 47 [Source:HGNC Symbol;Acc:HGNC:26708]	3.275	0.0003682	3.219	0.0006533	1.131	0.3551
ENSG00000204352	C9orf129	chromosome 9 open reading frame 129 [Source:HGNC Symbol;Acc:HGNC:31116]	2.955	0.02998	2.819	0.179	1.177	0.3656
ENSG00000102854	MSLN	mesothelin [Source:HGNC Symbol;Acc:HGNC:7371]	2.852	0.003408	2.806	0.01354	1.162	0.4065
ENSG00000196611	MMP1	matrix metallopeptidase 1 [Source:HGNC Symbol;Acc:HGNC:7155]	2.814	0.02662	2.756	0.0636	0.6551	0.619
ENSG00000135116	HRK	harakiri, BCL2 interacting protein [Source:HGNC Symbol;Acc:HGNC:5185]	2.807	3.715e-05	2.784	8.417e-05	2.335	0.008471
ENSG00000198829	SUCNR1	succinate receptor 1 [Source:HGNC Symbol;Acc:HGNC:4542]	2.678	0.001188	2.637	0.003234	1.225	0.1892
ENSG00000168542	COL3A1	collagen type III alpha 1 chain [Source:HGNC Symbol;Acc:HGNC:2201]	2.603	0.01794	2.583	0.04732	2.08	0.1463
ENSG00000185304	RGPD2	RANBP2 like and GRIP domain containing 2 [Source:HGNC Symbol;Acc:HGNC:32415]	2.402	0.003408	2.396	0.03231	2.29	0.1093
ENSG00000170153	RNF150	ring finger protein 150 [Source:HGNC Symbol;Acc:HGNC:23138]	2.294	0.003266	2.278	0.01336	1.075	0.1985
ENSG00000108700	CCL8	C-C motif chemokine ligand 8 [Source:HGNC Symbol;Acc:HGNC:10635]	2.277	0.02355	2.303	0.02668	1.1	0.3662
ENSG00000205420	KRT6A	keratin 6A [Source:HGNC Symbol;Acc:HGNC:6443]	2.235	0.09641	2.109	0.2355	1.886	0.1158
ENSG00000110195	FOLR1	folate receptor alpha [Source:HGNC Symbol;Acc:HGNC:3791]	2.165	0.02272	2.168	0.02746	0.9067	0.3018
ENSG00000164692	COL1A2	collagen type I alpha 2 chain [Source:HGNC Symbol;Acc:HGNC:2198]	2.163	0.073	1.968	0.2618	1.69	0.1795
ENSG00000115155	OTOF	otoferlin [Source:HGNC Symbol;Acc:HGNC:8515]	1.941	0.03407	1.943	0.02508	0.02604	0.9882
ENSG00000149256	TENM4	teneurin transmembrane protein 4 [Source:HGNC Symbol;Acc:HGNC:29945]	1.878	0.003191	1.876	0.005993	0.7921	0.401
ENSG00000243566	UPK3B	uroplakin 3B [Source:HGNC Symbol;Acc:HGNC:21444]	1.681	0.002483	1.675	0.004221	0.9505	0.246
ENSG00000186847	KRT14	keratin 14 [Source:HGNC Symbol;Acc:HGNC:6416]	1.655	0.1774	1.573	0.335	1.496	0.2475
ENSG00000129422	MTUS1	microtubule associated scaffold protein 1 [Source:HGNC Symbol;Acc:HGNC:29789]	1.59	0.0238	1.565	0.03561	0.3865	0.6285
ENSG00000131203	IDO1	indoleamine 2,3-dioxygenase 1 [Source:HGNC Symbol;Acc:HGNC:6059]	1.552	0.004861	1.544	0.005746	0.9589	0.2555
ENSG00000237541	HLA-DQA2	major histocompatibility complex, class II, DQ alpha 2 [Source:HGNC Symbol;Acc:HGNC:4943]	1.544	0.07741	1.542	0.07169	3.069	0.02016
ENSG00000071539	TRIP13	thyroid hormone receptor interactor 13 [Source:HGNC Symbol;Acc:HGNC:12307]	1.537	0.02064	1.521	0.03038	0.04895	0.9546
ENSG00000186654	PRR5	proline rich 5 [Source:HGNC Symbol;Acc:HGNC:31682]	1.465	0.01498	1.456	0.02397	1.815	0.02618
ENSG00000188672	RHCE	Rh blood group CcEe antigens [Source:HGNC Symbol;Acc:HGNC:10008]	1.463	0.002605	1.459	0.003024	0.6996	0.2954
ENSG00000277632	CCL3	C-C motif chemokine ligand 3 [Source:HGNC Symbol;Acc:HGNC:10627]	1.409	0.002398	1.414	0.001157	1.08	0.08704
ENSG00000147138	GPR174	G protein-coupled receptor 174 [Source:HGNC Symbol;Acc:HGNC:30245]	1.408	0.0002332	1.401	0.0003233	1.009	0.07853
ENSG00000153157	SYCP2L	synaptonemal complex protein 2 like [Source:HGNC Symbol;Acc:HGNC:21537]	1.353	0.1477	1.334	0.1692	1.037	0.3901
ENSG00000136244	IL6	interleukin 6 [Source:HGNC Symbol;Acc:HGNC:6018]	1.338	0.007516	1.34	0.008899	0.7994	0.2662
ENSG00000183690	EFHC2	EF-hand domain containing 2 [Source:HGNC Symbol;Acc:HGNC:26233]	1.318	0.01141	1.317	0.02513	1.256	0.04841
ENSG00000248405	PRR5-ARHGAP8	PRR5-ARHGAP8 readthrough [Source:HGNC Symbol;Acc:HGNC:34512]	1.306	0.005795	1.304	0.007479	1.678	0.01618
ENSG00000162065	TBC1D24	TBC1 domain family member 24 [Source:HGNC Symbol;Acc:HGNC:29203]	1.304	0.004335	1.307	0.007058	0.7542	0.229
ENSG00000184979	USP18	ubiquitin specific peptidase 18 [Source:HGNC Symbol;Acc:HGNC:12616]	1.29	0.03152	1.287	0.0271	0.482	0.6122
ENSG00000108821	COL1A1	collagen type I alpha 1 chain [Source:HGNC Symbol;Acc:HGNC:2197]	1.281	0.2236	1.075	0.424	1.733	0.1292
ENSG00000129990	SYT5	synaptotagmin 5 [Source:HGNC Symbol;Acc:HGNC:11513]	1.274	0.3448	1.223	0.4275	1.134	0.3273
ENSG00000168280	KIF5C	kinesin family member 5C [Source:HGNC Symbol;Acc:HGNC:6325]	1.267	0.009989	1.271	0.02078	0.7801	0.1523
ENSG00000263715	LINC02210-CRHR1	LINC02210-CRHR1 readthrough [Source:HGNC Symbol;Acc:HGNC:51483]	1.244	0.0006823	1.244	0.0009661	0.7811	0.09629
ENSG00000203907	OOEP	oocyte expressed protein [Source:HGNC Symbol;Acc:HGNC:21382]	1.237	0.002605	1.23	0.001177	0.6726	0.08891
ENSG00000177294	FBXO39	F-box protein 39 [Source:HGNC Symbol;Acc:HGNC:28565]	1.221	0.04172	1.222	0.05499	0.8192	0.3695
ENSG00000178538	CA8	carbonic anhydrase 8 [Source:HGNC Symbol;Acc:HGNC:1382]	1.217	0.07426	1.205	0.1256	0.7019	0.413
ENSG00000137959	IFI44L	interferon induced protein 44 like [Source:HGNC Symbol;Acc:HGNC:17817]	1.195	0.02248	1.197	0.01649	0.798	0.2078
ENSG00000204257	HLA-DMA	major histocompatibility complex, class II, DM alpha [Source:HGNC Symbol;Acc:HGNC:4934]	1.194	0.005627	1.195	0.01306	0.785	0.1292
ENSG00000166920	C15orf48	chromosome 15 open reading frame 48 [Source:HGNC Symbol;Acc:HGNC:29898]	1.174	0.01665	1.184	0.009661	0.8708	0.1694
ENSG00000173801	JUP	junction plakoglobin [Source:HGNC Symbol;Acc:HGNC:6207]	1.173	0.008004	1.178	0.007396	0.7444	0.1819
ENSG00000088827	SIGLEC1	sialic acid binding Ig like lectin 1 [Source:HGNC Symbol;Acc:HGNC:11127]	1.172	0.04679	1.171	0.03881	0.4896	0.5158
ENSG00000167768	KRT1	keratin 1 [Source:HGNC Symbol;Acc:HGNC:6412]	1.166	0.519	1.137	0.586	1.674	0.2591
ENSG00000232629	HLA-DQB2	major histocompatibility complex, class II, DQ beta 2 [Source:HGNC Symbol;Acc:HGNC:4945]	1.163	0.03098	1.165	0.0202	1.819	0.01064
ENSG00000120217	CD274	CD274 molecule [Source:HGNC Symbol;Acc:HGNC:17635]	1.162	0.04343	1.166	0.03532	1.22	0.1491
ENSG00000183117	CSMD1	CUB and Sushi multiple domains 1 [Source:HGNC Symbol;Acc:HGNC:14026]	1.146	0.04431	1.141	0.0543	0.6668	0.4375
ENSG00000134321	RSAD2	radical S-adenosyl methionine domain containing 2 [Source:HGNC Symbol;Acc:HGNC:30908]	1.124	0.01743	1.124	0.01491	0.6974	0.2451
ENSG00000253368	TRNP1	TMF1 regulated nuclear protein 1 [Source:HGNC Symbol;Acc:HGNC:34348]	1.121	0.004857	1.124	0.006844	0.471	0.4485
ENSG00000163666	HESX1	HESX homeobox 1 [Source:HGNC Symbol;Acc:HGNC:4877]	1.107	0.01693	1.111	0.02317	0.6419	0.3314
ENSG00000116141	MARK1	microtubule affinity regulating kinase 1 [Source:HGNC Symbol;Acc:HGNC:6896]	1.105	0.3371	1.007	0.5546	0.06072	0.952
ENSG00000154330	PGM5	phosphoglucomutase 5 [Source:HGNC Symbol;Acc:HGNC:8908]	1.1	0.002537	1.103	0.003061	0.9421	0.08687
ENSG00000104290	FZD3	frizzled class receptor 3 [Source:HGNC Symbol;Acc:HGNC:4041]	1.094	0.01074	1.099	0.01614	0.9098	0.1158
ENSG00000231767		novel protein similar to ribosomal protein S27a RPS27A	1.091	0.087	1.084	0.1085	0.6008	0.486
ENSG00000186081	KRT5	keratin 5 [Source:HGNC Symbol;Acc:HGNC:6442]	1.089	0.346	0.9138	0.5416	0.6396	0.6201
ENSG00000106772	PRUNE2	prune homolog 2 with BCH domain [Source:HGNC Symbol;Acc:HGNC:25209]	1.086	0.006193	1.085	0.01032	0.847	0.1244
ENSG00000113494	PRLR	prolactin receptor [Source:HGNC Symbol;Acc:HGNC:9446]	1.081	1.952e-06	1.086	5.845e-06	1.048	0.00328
ENSG00000160201	U2AF1	U2 small nuclear RNA auxiliary factor 1 [Source:HGNC Symbol;Acc:HGNC:12453]	1.071	0.1276	1.073	0.0998	2.878	0.005962
ENSG00000121335	PRB2	proline rich protein BstNI subfamily 2 [Source:HGNC Symbol;Acc:HGNC:9338]	1.066	0.0228	1.067	0.03369	0.9801	0.113
ENSG00000152766	ANKRD22	ankyrin repeat domain 22 [Source:HGNC Symbol;Acc:HGNC:28321]	1.063	0.0857	1.059	0.06961	0.6549	0.4221
ENSG00000026751	SLAMF7	SLAM family member 7 [Source:HGNC Symbol;Acc:HGNC:21394]	1.059	0.01866	1.056	0.0135	0.8176	0.1133
ENSG00000157856	DRC1	dynein regulatory complex subunit 1 [Source:HGNC Symbol;Acc:HGNC:24245]	1.053	0.2224	1.052	0.2691	0.4873	0.643
ENSG00000269028	MTRNR2L12	MT-RNR2 like 12 [Source:HGNC Symbol;Acc:HGNC:37169]	1.05	0.3455	1.05	0.5014	1.139	0.3925
ENSG00000214872	SMTNL1	smoothelin like 1 [Source:HGNC Symbol;Acc:HGNC:32394]	1.048	0.004067	1.051	0.004816	0.9018	0.0868
ENSG00000275302	CCL4	C-C motif chemokine ligand 4 [Source:HGNC Symbol;Acc:HGNC:10630]	1.047	0.1797	1.059	0.1583	0.8655	0.4049
ENSG00000183801	OLFML1	olfactomedin like 1 [Source:HGNC Symbol;Acc:HGNC:24473]	1.041	0.01644	1.04	0.02095	1.204	0.06844
ENSG00000047634	SCML1	Scm polycomb group protein like 1 [Source:HGNC Symbol;Acc:HGNC:10580]	1.04	3.715e-05	1.044	2.528e-05	0.9066	0.005867
ENSG00000125538	IL1B	interleukin 1 beta [Source:HGNC Symbol;Acc:HGNC:5992]	1.033	0.03522	1.042	0.02317	0.5397	0.3636
ENSG00000100288	CHKB	choline kinase beta [Source:HGNC Symbol;Acc:HGNC:1938]	1.019	5.5e-05	1.02	0.0003023	0.9074	0.01064
ENSG00000121653	MAPK8IP1	mitogen-activated protein kinase 8 interacting protein 1 [Source:HGNC Symbol;Acc:HGNC:6882]	1.014	0.0004158	1.018	0.0006307	0.9759	0.01076
ENSG00000111247	RAD51AP1	RAD51 associated protein 1 [Source:HGNC Symbol;Acc:HGNC:16956]	1.008	0.01458	1.007	0.02497	0.8476	0.1365
ENSG00000174989	FBXW8	F-box and WD repeat domain containing 8 [Source:HGNC Symbol;Acc:HGNC:13597]	1.005	1.952e-06	1.008	3.759e-06	0.8816	0.004511
ENSG00000078900	TP73	tumor protein p73 [Source:HGNC Symbol;Acc:HGNC:12003]	1.005	0.1271	1.007	0.1687	0.2005	0.8476
ENSG00000165338	HECTD2	HECT domain E3 ubiquitin protein ligase 2 [Source:HGNC Symbol;Acc:HGNC:26736]	1.001	0.007741	1.001	0.01551	0.8729	0.06614
ENSG00000152672	CLEC4F	C-type lectin domain family 4 member F [Source:HGNC Symbol;Acc:HGNC:25357]	0.998	0.1579	0.9906	0.1278	1.096	0.298
ENSG00000123689	G0S2	G0/G1 switch 2 [Source:HGNC Symbol;Acc:HGNC:30229]	0.9926	0.07457	0.9946	0.058	0.5968	0.408
ENSG00000156113	KCNMA1	potassium calcium-activated channel subfamily M alpha 1 [Source:HGNC Symbol;Acc:HGNC:6284]	0.9841	0.1373	0.9825	0.1458	1.107	0.217
ENSG00000138821	SLC39A8	solute carrier family 39 member 8 [Source:HGNC Symbol;Acc:HGNC:20862]	0.9822	0.01846	0.9815	0.01485	0.5967	0.2399
ENSG00000149554	CHEK1	checkpoint kinase 1 [Source:HGNC Symbol;Acc:HGNC:1925]	0.9815	0.0009808	0.9827	0.00272	0.7351	0.02684
ENSG00000166257	SCN3B	sodium voltage-gated channel beta subunit 3 [Source:HGNC Symbol;Acc:HGNC:20665]	0.9743	0.01897	0.9755	0.02513	0.8198	0.1932
ENSG00000146453	PNLDC1	PARN like, ribonuclease domain containing 1 [Source:HGNC Symbol;Acc:HGNC:21185]	0.9647	0.313	0.9786	0.2987	1.241	0.2397
ENSG00000280670	CCDC163	coiled-coil domain containing 163 [Source:HGNC Symbol;Acc:HGNC:27003]	0.9619	0.0673	0.9657	0.08826	1.119	0.1454
ENSG00000187608	ISG15	ISG15 ubiquitin like modifier [Source:HGNC Symbol;Acc:HGNC:4053]	0.955	0.04732	0.9543	0.04121	0.5905	0.3016
ENSG00000138646	HERC5	HECT and RLD domain containing E3 ubiquitin protein ligase 5 [Source:HGNC Symbol;Acc:HGNC:24368]	0.946	0.01881	0.9457	0.01474	0.7449	0.1396
ENSG00000170439	METTL7B	methyltransferase like 7B [Source:HGNC Symbol;Acc:HGNC:28276]	0.9403	0.2629	0.9358	0.3302	0.2271	0.8511
ENSG00000124882	EREG	epiregulin [Source:HGNC Symbol;Acc:HGNC:3443]	0.9319	0.1304	0.9379	0.1031	0.4482	0.6084
ENSG00000140287	HDC	histidine decarboxylase [Source:HGNC Symbol;Acc:HGNC:4855]	0.9291	0.2533	0.935	0.2837	-0.1231	0.9151
ENSG00000236444	UBE2L5	ubiquitin conjugating enzyme E2 L5 [Source:HGNC Symbol;Acc:HGNC:13477]	0.9241	0.09677	0.91	0.1172	0.3499	0.6329
ENSG00000169432	SCN9A	sodium voltage-gated channel alpha subunit 9 [Source:HGNC Symbol;Acc:HGNC:10597]	0.9186	0.05995	0.9165	0.08011	1.195	0.09225
ENSG00000104267	CA2	carbonic anhydrase 2 [Source:HGNC Symbol;Acc:HGNC:1373]	0.914	0.005672	0.9114	0.007279	0.8837	0.04056
ENSG00000070731	ST6GALNAC2	ST6 N-acetylgalactosaminide alpha-2,6-sialyltransferase 2 [Source:HGNC Symbol;Acc:HGNC:10867]	0.9102	0.02031	0.9086	0.02317	0.802	0.1759
ENSG00000170448	NFXL1	nuclear transcription factor, X-box binding like 1 [Source:HGNC Symbol;Acc:HGNC:18726]	0.91	0.0003791	0.9103	0.000528	0.7184	0.03475
ENSG00000075073	TACR2	tachykinin receptor 2 [Source:HGNC Symbol;Acc:HGNC:11527]	0.906	0.000608	0.9074	0.0009661	0.7326	0.03892
ENSG00000105499	PLA2G4C	phospholipase A2 group IVC [Source:HGNC Symbol;Acc:HGNC:9037]	0.9058	0.08327	0.9054	0.06477	0.5891	0.4447
ENSG00000164236	ANKRD33B	ankyrin repeat domain 33B [Source:HGNC Symbol;Acc:HGNC:35240]	0.9018	0.04493	0.9122	0.05216	0.8146	0.1283
ENSG00000151320	AKAP6	A-kinase anchoring protein 6 [Source:HGNC Symbol;Acc:HGNC:376]	0.8979	0.2551	0.8624	0.4655	0.2066	0.8361
ENSG00000102738	MRPS31	mitochondrial ribosomal protein S31 [Source:HGNC Symbol;Acc:HGNC:16632]	0.8948	0.1193	0.8855	0.1352	0.4787	0.5429
ENSG00000197121	PGAP1	post-GPI attachment to proteins inositol deacylase 1 [Source:HGNC Symbol;Acc:HGNC:25712]	0.8858	0.01408	0.8848	0.01626	0.8975	0.05665
ENSG00000126262	FFAR2	free fatty acid receptor 2 [Source:HGNC Symbol;Acc:HGNC:4501]	0.8836	0.05997	0.8827	0.04991	0.5313	0.3549
ENSG00000157680	DGKI	diacylglycerol kinase iota [Source:HGNC Symbol;Acc:HGNC:2855]	0.8803	0.01298	0.8727	0.01342	0.4089	0.3391
ENSG00000198795	ZNF521	zinc finger protein 521 [Source:HGNC Symbol;Acc:HGNC:24605]	0.8739	0.1778	0.8638	0.2363	-0.008845	0.9944
ENSG00000111696	NT5DC3	5'-nucleotidase domain containing 3 [Source:HGNC Symbol;Acc:HGNC:30826]	0.871	0.02936	0.8768	0.0379	0.971	0.07796
ENSG00000108691	CCL2	C-C motif chemokine ligand 2 [Source:HGNC Symbol;Acc:HGNC:10618]	0.8696	0.2243	0.8716	0.202	0.01972	0.9877
ENSG00000188282	RUFY4	RUN and FYVE domain containing 4 [Source:HGNC Symbol;Acc:HGNC:24804]	0.8633	0.0399	0.8644	0.03147	0.7237	0.1396
ENSG00000108950	FAM20A	FAM20A golgi associated secretory pathway pseudokinase [Source:HGNC Symbol;Acc:HGNC:23015]	0.8615	0.2409	0.8592	0.2121	0.5704	0.5815
ENSG00000120210	INSL6	insulin like 6 [Source:HGNC Symbol;Acc:HGNC:6089]	0.8592	0.003174	0.8618	0.00317	0.7704	0.04
ENSG00000115457	IGFBP2	insulin like growth factor binding protein 2 [Source:HGNC Symbol;Acc:HGNC:5471]	0.8539	0.5087	0.9626	0.4532	0.392	0.7902
ENSG00000169991	IFFO2	intermediate filament family orphan 2 [Source:HGNC Symbol;Acc:HGNC:27006]	0.8528	0.02361	0.8618	0.01756	0.6665	0.1214
ENSG00000164920	OSR2	odd-skipped related transciption factor 2 [Source:HGNC Symbol;Acc:HGNC:15830]	0.8506	0.03133	0.8531	0.04009	0.8989	0.07048
ENSG00000163421	PROK2	prokineticin 2 [Source:HGNC Symbol;Acc:HGNC:18455]	0.8484	0.05644	0.8471	0.04171	0.8779	0.09449
ENSG00000035720	STAP1	signal transducing adaptor family member 1 [Source:HGNC Symbol;Acc:HGNC:24133]	0.8477	0.06393	0.8485	0.08679	0.8378	0.1464
ENSG00000112096	SOD2	superoxide dismutase 2 [Source:HGNC Symbol;Acc:HGNC:11180]	0.846	0.007717	0.8462	0.01077	0.8686	0.03168
ENSG00000143476	DTL	denticleless E3 ubiquitin protein ligase homolog [Source:HGNC Symbol;Acc:HGNC:30288]	0.845	0.08936	0.8418	0.1062	0.494	0.4388
ENSG00000053328	METTL24	methyltransferase like 24 [Source:HGNC Symbol;Acc:HGNC:21566]	0.8415	0.0255	0.8428	0.04103	0.9579	0.03668
ENSG00000277443	MARCKS	myristoylated alanine rich protein kinase C substrate [Source:HGNC Symbol;Acc:HGNC:6759]	0.8392	0.00232	0.8425	0.002728	0.7691	0.02056
ENSG00000121858	TNFSF10	TNF superfamily member 10 [Source:HGNC Symbol;Acc:HGNC:11925]	0.8369	0.02843	0.8357	0.02033	0.7289	0.09902
ENSG00000206560	ANKRD28	ankyrin repeat domain 28 [Source:HGNC Symbol;Acc:HGNC:29024]	0.8329	0.06048	0.8348	0.04909	0.7228	0.165
ENSG00000266302		novel transcript	0.8281	0.5312	0.8358	0.521	2.499	0.2621
ENSG00000196705	ZNF431	zinc finger protein 431 [Source:HGNC Symbol;Acc:HGNC:20809]	0.8218	0.005651	0.8261	0.007479	0.5161	0.1456
ENSG00000123838	C4BPA	complement component 4 binding protein alpha [Source:HGNC Symbol;Acc:HGNC:1325]	0.8185	0.3961	0.7986	0.4226	0.8518	0.361
ENSG00000174871	CNIH2	cornichon family AMPA receptor auxiliary protein 2 [Source:HGNC Symbol;Acc:HGNC:28744]	0.8153	0.008791	0.8221	0.009372	0.724	0.05572
ENSG00000122728	TAF1L	TATA-box binding protein associated factor 1 like [Source:HGNC Symbol;Acc:HGNC:18056]	0.8108	0.4466	0.7629	0.542	-0.05277	0.9579
ENSG00000173193	PARP14	poly(ADP-ribose) polymerase family member 14 [Source:HGNC Symbol;Acc:HGNC:29232]	0.8069	0.0024	0.8089	0.002602	0.8656	0.009897
ENSG00000132530	XAF1	XIAP associated factor 1 [Source:HGNC Symbol;Acc:HGNC:30932]	0.8065	0.02951	0.8114	0.02033	0.5055	0.222
ENSG00000203814	H2BC18	H2B clustered histone 18 [Source:HGNC Symbol;Acc:HGNC:24700]	0.8051	0.1293	0.8011	0.1371	0.9342	0.198
ENSG00000154447	SH3RF1	SH3 domain containing ring finger 1 [Source:HGNC Symbol;Acc:HGNC:17650]	0.8001	0.0003173	0.802	0.0004349	0.7926	0.007773
ENSG00000100985	MMP9	matrix metallopeptidase 9 [Source:HGNC Symbol;Acc:HGNC:7176]	0.7987	0.1062	0.7931	0.1172	0.2026	0.7673
ENSG00000257341		novel protein	0.7974	0.141	0.8077	0.1542	0.9402	0.1419
ENSG00000100024	UPB1	beta-ureidopropionase 1 [Source:HGNC Symbol;Acc:HGNC:16297]	0.7939	0.07139	0.8009	0.09223	0.8791	0.08462
ENSG00000185829	ARL17A	ADP ribosylation factor like GTPase 17A [Source:HGNC Symbol;Acc:HGNC:24096]	0.7938	0.04272	0.7958	0.04822	0.4926	0.3405
ENSG00000137965	IFI44	interferon induced protein 44 [Source:HGNC Symbol;Acc:HGNC:16938]	0.7931	0.06565	0.7939	0.04822	0.6295	0.1908
ENSG00000276070	CCL4L2	C-C motif chemokine ligand 4 like 2 [Source:HGNC Symbol;Acc:HGNC:24066]	0.793	0.2384	0.8101	0.2233	0.11	0.9084
ENSG00000183876	ARSI	arylsulfatase family member I [Source:HGNC Symbol;Acc:HGNC:32521]	0.7928	0.4024	0.7872	0.3751	0.8493	0.4194
ENSG00000144115	THNSL2	threonine synthase like 2 [Source:HGNC Symbol;Acc:HGNC:25602]	0.7921	0.5497	0.7745	0.5112	0.7414	0.7024
ENSG00000196912	ANKRD36B	ankyrin repeat domain 36B [Source:HGNC Symbol;Acc:HGNC:29333]	0.7888	0.001433	0.7895	0.00223	0.6228	0.05189
ENSG00000137628	DDX60	DExD/H-box helicase 60 [Source:HGNC Symbol;Acc:HGNC:25942]	0.7828	0.004335	0.7827	0.004987	0.542	0.1198
ENSG00000060656	PTPRU	protein tyrosine phosphatase receptor type U [Source:HGNC Symbol;Acc:HGNC:9683]	0.7787	0.09141	0.7764	0.09883	0.7947	0.1903
ENSG00000143153	ATP1B1	ATPase Na+/K+ transporting subunit beta 1 [Source:HGNC Symbol;Acc:HGNC:804]	0.7753	0.01257	0.7771	0.0134	0.8741	0.05309
ENSG00000184371	CSF1	colony stimulating factor 1 [Source:HGNC Symbol;Acc:HGNC:2432]	0.7728	0.1106	0.7801	0.09582	0.9091	0.1352
ENSG00000118513	MYB	MYB proto-oncogene, transcription factor [Source:HGNC Symbol;Acc:HGNC:7545]	0.7691	0.00748	0.7699	0.01336	0.7473	0.06376
ENSG00000197147	LRRC8B	leucine rich repeat containing 8 VRAC subunit B [Source:HGNC Symbol;Acc:HGNC:30692]	0.7691	0.02771	0.773	0.01872	0.5401	0.1757
ENSG00000173262	SLC2A14	solute carrier family 2 member 14 [Source:HGNC Symbol;Acc:HGNC:18301]	0.7688	0.4137	0.7681	0.4354	-0.4194	0.7648
ENSG00000170298	LGALS9B	galectin 9B [Source:HGNC Symbol;Acc:HGNC:24842]	0.7677	0.4152	0.7462	0.6083	0.5573	0.6247
ENSG00000170802	FOXN2	forkhead box N2 [Source:HGNC Symbol;Acc:HGNC:5281]	0.7651	0.00023	0.7678	0.0003023	0.7049	0.00501
ENSG00000139174	PRICKLE1	prickle planar cell polarity protein 1 [Source:HGNC Symbol;Acc:HGNC:17019]	0.7602	0.06488	0.7609	0.09244	0.9786	0.07809
ENSG00000260851		novel protein	0.756	0.01393	0.7596	0.0163	0.6252	0.1252
ENSG00000156675	RAB11FIP1	RAB11 family interacting protein 1 [Source:HGNC Symbol;Acc:HGNC:30265]	0.7548	0.0005107	0.7601	0.0006316	0.7235	0.01076
ENSG00000114204	SERPINI2	serpin family I member 2 [Source:HGNC Symbol;Acc:HGNC:8945]	0.7487	0.01571	0.7529	0.02095	0.6516	0.09744
ENSG00000164199	ADGRV1	adhesion G protein-coupled receptor V1 [Source:HGNC Symbol;Acc:HGNC:17416]	0.7482	0.008067	0.7472	0.0205	0.76	0.04684
ENSG00000156206	CFAP161	cilia and flagella associated protein 161 [Source:HGNC Symbol;Acc:HGNC:26782]	0.7472	0.04798	0.7477	0.06273	0.6777	0.1059
ENSG00000068796	KIF2A	kinesin family member 2A [Source:HGNC Symbol;Acc:HGNC:6318]	0.7439	0.0002221	0.7492	0.0004682	0.6184	0.01595
ENSG00000163710	PCOLCE2	procollagen C-endopeptidase enhancer 2 [Source:HGNC Symbol;Acc:HGNC:8739]	0.7436	0.21	0.7412	0.2982	0.7118	0.3584
ENSG00000154265	ABCA5	ATP binding cassette subfamily A member 5 [Source:HGNC Symbol;Acc:HGNC:35]	0.7347	0.03322	0.7357	0.03335	0.5748	0.1804
ENSG00000250312	ZNF718	zinc finger protein 718 [Source:HGNC Symbol;Acc:HGNC:26889]	0.7344	0.03074	0.737	0.0354	0.7929	0.08672
ENSG00000177453	NIM1K	NIM1 serine/threonine protein kinase [Source:HGNC Symbol;Acc:HGNC:28646]	0.7336	0.02781	0.7355	0.04506	0.8315	0.02756
ENSG00000105609	LILRB5	leukocyte immunoglobulin like receptor B5 [Source:HGNC Symbol;Acc:HGNC:6609]	0.7289	0.1386	0.7219	0.1563	0.08582	0.9151
ENSG00000162433	AK4	adenylate kinase 4 [Source:HGNC Symbol;Acc:HGNC:363]	0.7281	0.04166	0.7251	0.04733	0.6433	0.1619
ENSG00000170412	GPRC5C	G protein-coupled receptor class C group 5 member C [Source:HGNC Symbol;Acc:HGNC:13309]	0.7272	0.08879	0.7281	0.106	0.4887	0.4074
ENSG00000121989	ACVR2A	activin A receptor type 2A [Source:HGNC Symbol;Acc:HGNC:173]	0.7251	0.002785	0.731	0.00278	0.6081	0.03758
ENSG00000126709	IFI6	interferon alpha inducible protein 6 [Source:HGNC Symbol;Acc:HGNC:4054]	0.7235	0.1336	0.7222	0.1031	0.3713	0.5092
ENSG00000135541	AHI1	Abelson helper integration site 1 [Source:HGNC Symbol;Acc:HGNC:21575]	0.7226	0.004256	0.7248	0.005755	0.6725	0.02894
ENSG00000154479	CCDC173	coiled-coil domain containing 173 [Source:HGNC Symbol;Acc:HGNC:25064]	0.7214	0.119	0.7235	0.1274	0.6886	0.2539
ENSG00000154274	C4orf19	chromosome 4 open reading frame 19 [Source:HGNC Symbol;Acc:HGNC:25618]	0.7201	0.0142	0.7255	0.01949	0.7586	0.04189
ENSG00000145708	CRHBP	corticotropin releasing hormone binding protein [Source:HGNC Symbol;Acc:HGNC:2356]	0.7198	0.02181	0.7259	0.02869	0.5235	0.2067
ENSG00000176092	CRYBG2	crystallin beta-gamma domain containing 2 [Source:HGNC Symbol;Acc:HGNC:17295]	0.7198	0.2517	0.7176	0.3055	0.3573	0.7591
ENSG00000038210	PI4K2B	phosphatidylinositol 4-kinase type 2 beta [Source:HGNC Symbol;Acc:HGNC:18215]	0.7193	1.502e-09	0.7215	1.693e-07	0.7124	5.494e-05
ENSG00000165259	HDX	highly divergent homeobox [Source:HGNC Symbol;Acc:HGNC:26411]	0.7168	0.08736	0.7189	0.1019	1.317	0.04543
ENSG00000165646	SLC18A2	solute carrier family 18 member A2 [Source:HGNC Symbol;Acc:HGNC:10935]	0.7162	0.0004532	0.7179	0.0007834	0.57	0.04725
ENSG00000170837	GPR27	G protein-coupled receptor 27 [Source:HGNC Symbol;Acc:HGNC:4482]	0.7149	0.01143	0.7118	0.01383	0.6549	0.08079
ENSG00000153982	GDPD1	glycerophosphodiester phosphodiesterase domain containing 1 [Source:HGNC Symbol;Acc:HGNC:20883]	0.7141	0.03994	0.7098	0.06571	0.873	0.0932
ENSG00000182782	HCAR2	hydroxycarboxylic acid receptor 2 [Source:HGNC Symbol;Acc:HGNC:24827]	0.7132	0.05438	0.7131	0.06273	0.4966	0.3384
ENSG00000197646	PDCD1LG2	programmed cell death 1 ligand 2 [Source:HGNC Symbol;Acc:HGNC:18731]	0.7128	0.1373	0.71	0.1577	0.4733	0.4085
ENSG00000023445	BIRC3	baculoviral IAP repeat containing 3 [Source:HGNC Symbol;Acc:HGNC:591]	0.7126	0.0006057	0.7149	0.0007286	0.6458	0.01436
ENSG00000163145	C1QTNF7	C1q and TNF related 7 [Source:HGNC Symbol;Acc:HGNC:14342]	0.7125	0.0706	0.713	0.08617	1.052	0.03115
ENSG00000133317	LGALS12	galectin 12 [Source:HGNC Symbol;Acc:HGNC:15788]	0.7095	0.123	0.7135	0.1466	0.8504	0.1287
ENSG00000036565	SLC18A1	solute carrier family 18 member A1 [Source:HGNC Symbol;Acc:HGNC:10934]	0.7077	0.0457	0.7026	0.07719	0.6908	0.1317
ENSG00000177409	SAMD9L	sterile alpha motif domain containing 9 like [Source:HGNC Symbol;Acc:HGNC:1349]	0.7072	0.01288	0.7067	0.01488	0.4955	0.1521
ENSG00000196268	ZNF493	zinc finger protein 493 [Source:HGNC Symbol;Acc:HGNC:23708]	0.7069	0.07416	0.7123	0.08915	0.6022	0.259
ENSG00000156738	MS4A1	membrane spanning 4-domains A1 [Source:HGNC Symbol;Acc:HGNC:7315]	0.7066	0.05122	0.7096	0.05275	0.536	0.3139
ENSG00000204632	HLA-G	major histocompatibility complex, class I, G [Source:HGNC Symbol;Acc:HGNC:4964]	0.706	0.191	0.702	0.1776	0.3184	0.653
ENSG00000164509	IL31RA	interleukin 31 receptor A [Source:HGNC Symbol;Acc:HGNC:18969]	0.705	0.05407	0.7088	0.04368	0.5415	0.2068
ENSG00000167210	LOXHD1	lipoxygenase homology domains 1 [Source:HGNC Symbol;Acc:HGNC:26521]	0.7048	0.01002	0.7054	0.01626	0.6422	0.06665
ENSG00000143344	RGL1	ral guanine nucleotide dissociation stimulator like 1 [Source:HGNC Symbol;Acc:HGNC:30281]	0.7039	0.1019	0.7079	0.09037	0.6194	0.2012
ENSG00000171714	ANO5	anoctamin 5 [Source:HGNC Symbol;Acc:HGNC:27337]	0.7031	0.08136	0.7035	0.08762	0.6012	0.3376
ENSG00000142494	SLC47A1	solute carrier family 47 member 1 [Source:HGNC Symbol;Acc:HGNC:25588]	0.7027	0.2908	0.7136	0.2887	0.4871	0.6931
ENSG00000174776	WDR49	WD repeat domain 49 [Source:HGNC Symbol;Acc:HGNC:26587]	0.7024	0.01818	0.7087	0.02668	0.6064	0.0932
ENSG00000131016	AKAP12	A-kinase anchoring protein 12 [Source:HGNC Symbol;Acc:HGNC:370]	0.7019	0.2837	0.7	0.3692	0.1243	0.8711
ENSG00000165682	CLEC1B	C-type lectin domain family 1 member B [Source:HGNC Symbol;Acc:HGNC:24356]	0.6998	0.001657	0.7042	0.002176	0.6356	0.01579
ENSG00000152952	PLOD2	procollagen-lysine,2-oxoglutarate 5-dioxygenase 2 [Source:HGNC Symbol;Acc:HGNC:9082]	0.6984	0.5112	0.6481	0.6018	0.4656	0.6048
ENSG00000172456	FGGY	FGGY carbohydrate kinase domain containing [Source:HGNC Symbol;Acc:HGNC:25610]	0.6958	0.003261	0.6969	0.0048	0.6212	0.05582
ENSG00000029153	ARNTL2	aryl hydrocarbon receptor nuclear translocator like 2 [Source:HGNC Symbol;Acc:HGNC:18984]	0.694	0.002566	0.6954	0.003656	0.8025	0.01362
ENSG00000283321		novel protein	0.6932	0.02665	0.6966	0.04081	0.6608	0.09646
ENSG00000149131	SERPING1	serpin family G member 1 [Source:HGNC Symbol;Acc:HGNC:1228]	0.693	0.2177	0.6897	0.1909	0.211	0.7772
ENSG00000276644	DACH1	dachshund family transcription factor 1 [Source:HGNC Symbol;Acc:HGNC:2663]	0.6928	0.006588	0.6928	0.01446	0.7129	0.02231
ENSG00000152207	CYSLTR2	cysteinyl leukotriene receptor 2 [Source:HGNC Symbol;Acc:HGNC:18274]	0.6893	0.01098	0.693	0.01478	0.8174	0.01076
ENSG00000186645	SPDYE17	speedy/RINGO cell cycle regulator family member E17 [Source:HGNC Symbol;Acc:HGNC:51513]	0.689	0.007096	0.6902	0.00793	0.6076	0.04056
ENSG00000177807	KCNJ10	potassium inwardly rectifying channel subfamily J member 10 [Source:HGNC Symbol;Acc:HGNC:6256]	0.6883	0.2251	0.6808	0.2722	0.3436	0.7152
ENSG00000170214	ADRA1B	adrenoceptor alpha 1B [Source:HGNC Symbol;Acc:HGNC:278]	0.6871	0.4234	0.6732	0.6285	0.07927	0.9461
ENSG00000204172	AGAP9	ArfGAP with GTPase domain, ankyrin repeat and PH domain 9 [Source:HGNC Symbol;Acc:HGNC:23463]	0.6856	0.0403	0.6883	0.03964	0.5061	0.2192
ENSG00000102096	PIM2	Pim-2 proto-oncogene, serine/threonine kinase [Source:HGNC Symbol;Acc:HGNC:8987]	0.6846	0.001463	0.6873	0.001674	0.5676	0.03148
ENSG00000254521	SIGLEC12	sialic acid binding Ig like lectin 12 (gene/pseudogene) [Source:HGNC Symbol;Acc:HGNC:15482]	0.6843	0.3133	0.6861	0.3343	1.37	0.1382
ENSG00000112149	CD83	CD83 molecule [Source:HGNC Symbol;Acc:HGNC:1703]	0.684	0.07741	0.6899	0.05428	0.7154	0.09863
ENSG00000163659	TIPARP	TCDD inducible poly(ADP-ribose) polymerase [Source:HGNC Symbol;Acc:HGNC:23696]	0.681	0.00474	0.6826	0.005486	0.6257	0.03853
ENSG00000122035	RASL11A	RAS like family 11 member A [Source:HGNC Symbol;Acc:HGNC:23802]	0.6803	0.03749	0.679	0.04861	0.6217	0.12
ENSG00000133106	EPSTI1	epithelial stromal interaction 1 [Source:HGNC Symbol;Acc:HGNC:16465]	0.6786	0.05862	0.6796	0.04822	0.5677	0.1669
ENSG00000165917	RAPSN	receptor associated protein of the synapse [Source:HGNC Symbol;Acc:HGNC:9863]	0.675	0.008071	0.6779	0.01383	0.654	0.05209
ENSG00000163697	APBB2	amyloid beta precursor protein binding family B member 2 [Source:HGNC Symbol;Acc:HGNC:582]	0.6724	0.1523	0.6667	0.1683	0.9266	0.09923
ENSG00000197782	ZNF780A	zinc finger protein 780A [Source:HGNC Symbol;Acc:HGNC:27603]	0.6712	0.01062	0.6758	0.01526	0.5165	0.1134
ENSG00000020577	SAMD4A	sterile alpha motif domain containing 4A [Source:HGNC Symbol;Acc:HGNC:23023]	0.6712	0.03786	0.6764	0.04152	0.6716	0.1049
ENSG00000166439	RNF169	ring finger protein 169 [Source:HGNC Symbol;Acc:HGNC:26961]	0.6705	0.0002221	0.6751	0.0006031	0.5717	0.01064
ENSG00000137198	GMPR	guanosine monophosphate reductase [Source:HGNC Symbol;Acc:HGNC:4376]	0.6696	0.1474	0.6745	0.1327	0.3932	0.5311
ENSG00000154640	BTG3	BTG anti-proliferation factor 3 [Source:HGNC Symbol;Acc:HGNC:1132]	0.6675	0.02545	0.6746	0.02826	0.6108	0.08083
ENSG00000144802	NFKBIZ	NFKB inhibitor zeta [Source:HGNC Symbol;Acc:HGNC:29805]	0.6653	0.0003682	0.6667	0.0004933	0.6892	0.004346
ENSG00000088280	ASAP3	ArfGAP with SH3 domain, ankyrin repeat and PH domain 3 [Source:HGNC Symbol;Acc:HGNC:14987]	0.6649	0.1137	0.664	0.1364	0.6358	0.2474
ENSG00000059915	PSD	pleckstrin and Sec7 domain containing [Source:HGNC Symbol;Acc:HGNC:9507]	0.6642	0.09959	0.6666	0.1255	0.7524	0.1158
ENSG00000141664	ZCCHC2	zinc finger CCHC-type containing 2 [Source:HGNC Symbol;Acc:HGNC:22916]	0.6633	0.002147	0.6643	0.002193	0.5712	0.03115
ENSG00000171241	SHCBP1	SHC binding and spindle associated 1 [Source:HGNC Symbol;Acc:HGNC:29547]	0.6631	0.001191	0.669	0.003024	0.5695	0.02483
ENSG00000132622	HSPA12B	heat shock protein family A (Hsp70) member 12B [Source:HGNC Symbol;Acc:HGNC:16193]	0.6619	0.1363	0.6622	0.1629	0.5163	0.416
ENSG00000133739	LRRCC1	leucine rich repeat and coiled-coil centrosomal protein 1 [Source:HGNC Symbol;Acc:HGNC:29373]	0.66	0.005287	0.6615	0.01077	0.6724	0.03364
ENSG00000156194	PPEF2	protein phosphatase with EF-hand domain 2 [Source:HGNC Symbol;Acc:HGNC:9244]	0.6584	0.1393	0.6576	0.1557	0.6626	0.197
ENSG00000255398	HCAR3	hydroxycarboxylic acid receptor 3 [Source:HGNC Symbol;Acc:HGNC:16824]	0.657	0.1352	0.6592	0.1339	0.4676	0.3763
ENSG00000198870	STKLD1	serine/threonine kinase like domain containing 1 [Source:HGNC Symbol;Acc:HGNC:28669]	0.6569	0.01025	0.658	0.01828	0.6883	0.0315
ENSG00000175356	SCUBE2	signal peptide, CUB domain and EGF like domain containing 2 [Source:HGNC Symbol;Acc:HGNC:30425]	0.6545	0.06252	0.6521	0.09894	0.6662	0.1285
ENSG00000151692	RNF144A	ring finger protein 144A [Source:HGNC Symbol;Acc:HGNC:20457]	0.6539	0.01453	0.6532	0.01872	0.5462	0.1087
ENSG00000215912	TTC34	tetratricopeptide repeat domain 34 [Source:HGNC Symbol;Acc:HGNC:34297]	0.6533	0.02538	0.6572	0.03881	0.7432	0.04189
ENSG00000143452	HORMAD1	HORMA domain containing 1 [Source:HGNC Symbol;Acc:HGNC:25245]	0.6522	0.005287	0.6533	0.007684	0.7171	0.0145
ENSG00000197748	CFAP43	cilia and flagella associated protein 43 [Source:HGNC Symbol;Acc:HGNC:26684]	0.6515	0.008835	0.6568	0.02217	0.5587	0.06245
ENSG00000206557	TRIM71	tripartite motif containing 71 [Source:HGNC Symbol;Acc:HGNC:32669]	0.6512	0.1363	0.6458	0.1747	0.7996	0.1339
ENSG00000145287	PLAC8	placenta associated 8 [Source:HGNC Symbol;Acc:HGNC:19254]	0.6496	0.0533	0.6496	0.03488	0.6835	0.05309
ENSG00000071794	HLTF	helicase like transcription factor [Source:HGNC Symbol;Acc:HGNC:11099]	0.6483	0.006446	0.6467	0.01745	0.6872	0.01913
ENSG00000154928	EPHB1	EPH receptor B1 [Source:HGNC Symbol;Acc:HGNC:3392]	0.6483	0.02697	0.6472	0.04141	0.5206	0.144
ENSG00000077616	NAALAD2	N-acetylated alpha-linked acidic dipeptidase 2 [Source:HGNC Symbol;Acc:HGNC:14526]	0.6479	0.05181	0.6479	0.06506	0.602	0.116
ENSG00000205464	ATP6AP1L	ATPase H+ transporting accessory protein 1 like [Source:HGNC Symbol;Acc:HGNC:28091]	0.6471	0.05966	0.6491	0.06662	0.5001	0.2572
ENSG00000164123	C4orf45	chromosome 4 open reading frame 45 [Source:HGNC Symbol;Acc:HGNC:26342]	0.6438	0.4229	0.6369	0.513	0.1951	0.8739
ENSG00000268870		novel zinc finger protein	0.6435	0.2115	0.6444	0.2274	-0.003058	0.9978
ENSG00000115267	IFIH1	interferon induced with helicase C domain 1 [Source:HGNC Symbol;Acc:HGNC:18873]	0.6432	0.002034	0.6445	0.002228	0.5834	0.02466
ENSG00000133216	EPHB2	EPH receptor B2 [Source:HGNC Symbol;Acc:HGNC:3393]	0.6403	0.08887	0.6436	0.08942	0.7703	0.1006
ENSG00000284194	SCO2	SCO cytochrome c oxidase assembly protein 2 [Source:HGNC Symbol;Acc:HGNC:10604]	0.6389	0.03305	0.6404	0.03511	0.4997	0.1641
ENSG00000156042	CFAP70	cilia and flagella associated protein 70 [Source:HGNC Symbol;Acc:HGNC:30726]	0.638	0.03147	0.64	0.04265	0.7162	0.07052
ENSG00000134326	CMPK2	cytidine/uridine monophosphate kinase 2 [Source:HGNC Symbol;Acc:HGNC:27015]	0.6369	0.1343	0.6365	0.117	0.4964	0.327
ENSG00000146215	CRIP3	cysteine rich protein 3 [Source:HGNC Symbol;Acc:HGNC:17751]	0.6349	0.1196	0.6378	0.1312	0.6048	0.2401
ENSG00000157551	KCNJ15	potassium inwardly rectifying channel subfamily J member 15 [Source:HGNC Symbol;Acc:HGNC:6261]	0.6348	0.09205	0.6281	0.09922	0.3228	0.5228
ENSG00000125618	PAX8	paired box 8 [Source:HGNC Symbol;Acc:HGNC:8622]	0.6346	0.1091	0.6355	0.1125	0.9752	0.05635
ENSG00000168389	MFSD2A	major facilitator superfamily domain containing 2A [Source:HGNC Symbol;Acc:HGNC:25897]	0.6326	0.03056	0.6374	0.03231	0.5897	0.08527
ENSG00000107789	MINPP1	multiple inositol-polyphosphate phosphatase 1 [Source:HGNC Symbol;Acc:HGNC:7102]	0.6314	0.1052	0.635	0.1106	0.5831	0.2045
ENSG00000178573	MAF	MAF bZIP transcription factor [Source:HGNC Symbol;Acc:HGNC:6776]	0.6312	0.01657	0.632	0.02817	0.7668	0.01879
ENSG00000117228	GBP1	guanylate binding protein 1 [Source:HGNC Symbol;Acc:HGNC:4182]	0.6293	0.1911	0.6319	0.1599	0.5688	0.2762
ENSG00000156265	MAP3K7CL	MAP3K7 C-terminal like [Source:HGNC Symbol;Acc:HGNC:16457]	0.6286	0.05731	0.6289	0.0752	0.4593	0.2968
ENSG00000111912	NCOA7	nuclear receptor coactivator 7 [Source:HGNC Symbol;Acc:HGNC:21081]	0.627	0.00226	0.6272	0.002554	0.5261	0.03321
ENSG00000221955	SLC12A8	solute carrier family 12 member 8 [Source:HGNC Symbol;Acc:HGNC:15595]	0.6258	0.09857	0.6259	0.1306	0.5005	0.3152
ENSG00000123610	TNFAIP6	TNF alpha induced protein 6 [Source:HGNC Symbol;Acc:HGNC:11898]	0.6251	0.1624	0.6244	0.2211	0.7345	0.2178
ENSG00000107201	DDX58	DExD/H-box helicase 58 [Source:HGNC Symbol;Acc:HGNC:19102]	0.6179	0.007507	0.6189	0.008247	0.5119	0.05969
ENSG00000164116	GUCY1A1	guanylate cyclase 1 soluble subunit alpha 1 [Source:HGNC Symbol;Acc:HGNC:4685]	0.6176	0.2143	0.6148	0.224	0.6096	0.33
ENSG00000175893	ZDHHC21	zinc finger DHHC-type containing 21 [Source:HGNC Symbol;Acc:HGNC:20750]	0.6169	0.004059	0.6181	0.005599	0.4863	0.0691
ENSG00000119714	GPR68	G protein-coupled receptor 68 [Source:HGNC Symbol;Acc:HGNC:4519]	0.6161	0.1118	0.6172	0.1347	0.4433	0.2858
ENSG00000142875	PRKACB	protein kinase cAMP-activated catalytic subunit beta [Source:HGNC Symbol;Acc:HGNC:9381]	0.6148	0.002286	0.6189	0.003656	0.5897	0.01916
ENSG00000170873	MTSS1	MTSS I-BAR domain containing 1 [Source:HGNC Symbol;Acc:HGNC:20443]	0.6143	0.06435	0.6241	0.05185	0.5153	0.1409
ENSG00000197992	CLEC9A	C-type lectin domain containing 9A [Source:HGNC Symbol;Acc:HGNC:26705]	0.6141	0.08442	0.6069	0.1341	0.7235	0.0932
ENSG00000120696	KBTBD7	kelch repeat and BTB domain containing 7 [Source:HGNC Symbol;Acc:HGNC:25266]	0.6136	0.01415	0.6146	0.02284	0.6868	0.03087
ENSG00000154451	GBP5	guanylate binding protein 5 [Source:HGNC Symbol;Acc:HGNC:19895]	0.6136	0.2388	0.6133	0.2057	0.619	0.2636
ENSG00000153898	MCOLN2	mucolipin 2 [Source:HGNC Symbol;Acc:HGNC:13357]	0.6127	0.1415	0.6208	0.1414	0.4083	0.4536
ENSG00000091136	LAMB1	laminin subunit beta 1 [Source:HGNC Symbol;Acc:HGNC:6486]	0.6118	0.01785	0.6111	0.02624	0.5687	0.07145
ENSG00000127314	RAP1B	RAP1B, member of RAS oncogene family [Source:HGNC Symbol;Acc:HGNC:9857]	0.6111	0.01472	0.6164	0.01563	0.5125	0.08266
ENSG00000206190	ATP10A	ATPase phospholipid transporting 10A (putative) [Source:HGNC Symbol;Acc:HGNC:13542]	0.6105	0.02155	0.6126	0.02352	0.4615	0.1647
ENSG00000228716	DHFR	dihydrofolate reductase [Source:HGNC Symbol;Acc:HGNC:2861]	0.6101	0.3743	0.6083	0.3744	-0.02418	0.9771
ENSG00000122432	SPATA1	spermatogenesis associated 1 [Source:HGNC Symbol;Acc:HGNC:14682]	0.6094	0.009794	0.613	0.0134	0.5114	0.0897
ENSG00000137812	KNL1	kinetochore scaffold 1 [Source:HGNC Symbol;Acc:HGNC:24054]	0.609	0.0107	0.6187	0.02552	0.4757	0.1011
ENSG00000171408	PDE7B	phosphodiesterase 7B [Source:HGNC Symbol;Acc:HGNC:8792]	0.6087	0.01989	0.6112	0.03173	0.5557	0.08687
ENSG00000146350	TBC1D32	TBC1 domain family member 32 [Source:HGNC Symbol;Acc:HGNC:21485]	0.6077	0.0111	0.6081	0.02253	0.5549	0.08166
ENSG00000169429	CXCL8	C-X-C motif chemokine ligand 8 [Source:HGNC Symbol;Acc:HGNC:6025]	0.6073	0.2685	0.606	0.2364	0.6008	0.3257
ENSG00000285708		novel protein	0.6034	0.0002221	0.6038	0.0007286	0.6248	0.006611
ENSG00000204991	SPIRE2	spire type actin nucleation factor 2 [Source:HGNC Symbol;Acc:HGNC:30623]	0.6034	0.1399	0.607	0.1748	0.4871	0.3917
ENSG00000071242	RPS6KA2	ribosomal protein S6 kinase A2 [Source:HGNC Symbol;Acc:HGNC:10431]	0.6026	0.004215	0.606	0.006398	0.6129	0.02414
ENSG00000100592	DAAM1	dishevelled associated activator of morphogenesis 1 [Source:HGNC Symbol;Acc:HGNC:18142]	0.6023	0.03419	0.6052	0.04862	0.729	0.02557
ENSG00000233087	RAB6D	RAB6D, member RAS oncogene family [Source:HGNC Symbol;Acc:HGNC:30272]	0.5999	0.2444	0.5927	0.3255	0.2658	0.6964
ENSG00000120675	DNAJC15	DnaJ heat shock protein family (Hsp40) member C15 [Source:HGNC Symbol;Acc:HGNC:20325]	0.5993	0.0006167	0.6008	0.0009661	0.6076	0.006828
ENSG00000145348	TBCK	TBC1 domain containing kinase [Source:HGNC Symbol;Acc:HGNC:28261]	0.5992	0.001433	0.6012	0.002121	0.5044	0.01801
ENSG00000149021	SCGB1A1	secretoglobin family 1A member 1 [Source:HGNC Symbol;Acc:HGNC:12523]	0.599	0.3415	0.6062	0.3373	0.3205	0.7209
ENSG00000148200	NR6A1	nuclear receptor subfamily 6 group A member 1 [Source:HGNC Symbol;Acc:HGNC:7985]	0.5982	0.01186	0.6016	0.01491	0.4842	0.08715
ENSG00000272602	ZNF595	zinc finger protein 595 [Source:HGNC Symbol;Acc:HGNC:27196]	0.598	0.1742	0.6014	0.1941	0.4219	0.4533
ENSG00000163171	CDC42EP3	CDC42 effector protein 3 [Source:HGNC Symbol;Acc:HGNC:16943]	0.5973	0.02066	0.5964	0.02746	0.7242	0.01688
ENSG00000123213	NLN	neurolysin [Source:HGNC Symbol;Acc:HGNC:16058]	0.5969	0.0001581	0.597	0.0003233	0.5841	0.005194
ENSG00000095585	BLNK	B cell linker [Source:HGNC Symbol;Acc:HGNC:14211]	0.5966	0.08943	0.5975	0.1031	0.6311	0.1774
ENSG00000117013	KCNQ4	potassium voltage-gated channel subfamily Q member 4 [Source:HGNC Symbol;Acc:HGNC:6298]	0.5956	0.0428	0.6017	0.05808	0.3838	0.2994
ENSG00000103528	SYT17	synaptotagmin 17 [Source:HGNC Symbol;Acc:HGNC:24119]	0.5946	0.2023	0.5993	0.212	0.09909	0.8874
ENSG00000158234	FAIM	Fas apoptotic inhibitory molecule [Source:HGNC Symbol;Acc:HGNC:18703]	0.5939	0.008067	0.5971	0.0134	0.4374	0.1044
ENSG00000129473	BCL2L2	BCL2 like 2 [Source:HGNC Symbol;Acc:HGNC:995]	0.5919	0.03144	0.5939	0.0506	0.5014	0.14
ENSG00000196369	SRGAP2B	SLIT-ROBO Rho GTPase activating protein 2B [Source:HGNC Symbol;Acc:HGNC:35237]	0.5916	0.0008138	0.5929	0.002115	0.6868	0.004511
ENSG00000118242	MREG	melanoregulin [Source:HGNC Symbol;Acc:HGNC:25478]	0.5915	0.07207	0.5947	0.08952	0.414	0.2954
ENSG00000131773	KHDRBS3	KH RNA binding domain containing, signal transduction associated 3 [Source:HGNC Symbol;Acc:HGNC:18117]	0.5905	0.2825	0.5851	0.3581	0.4696	0.4383
ENSG00000106462	EZH2	enhancer of zeste 2 polycomb repressive complex 2 subunit [Source:HGNC Symbol;Acc:HGNC:3527]	0.5893	0.01415	0.5955	0.0165	0.4472	0.08266
ENSG00000138642	HERC6	HECT and RLD domain containing E3 ubiquitin protein ligase family member 6 [Source:HGNC Symbol;Acc:HGNC:26072]	0.587	0.02725	0.5883	0.03125	0.4281	0.198
ENSG00000196850	PPTC7	PTC7 protein phosphatase homolog [Source:HGNC Symbol;Acc:HGNC:30695]	0.586	0.001399	0.5902	0.001854	0.5339	0.01397
ENSG00000137414	FAM8A1	family with sequence similarity 8 member A1 [Source:HGNC Symbol;Acc:HGNC:16372]	0.5847	7.258e-06	0.5858	2.486e-05	0.5407	0.002457
ENSG00000116711	PLA2G4A	phospholipase A2 group IVA [Source:HGNC Symbol;Acc:HGNC:9035]	0.5824	0.0003197	0.5842	0.0007286	0.5309	0.009422
ENSG00000250349		novel proline rich Gla (G-carboxyglutamic acid) 1 (PRRG1) and tetraspanin 7 (TSPAN7) protein	0.5824	0.002859	0.584	0.003518	0.6337	0.008872
ENSG00000138755	CXCL9	C-X-C motif chemokine ligand 9 [Source:HGNC Symbol;Acc:HGNC:7098]	0.5824	0.1189	0.5815	0.1225	0.3176	0.5397
ENSG00000117525	F3	coagulation factor III, tissue factor [Source:HGNC Symbol;Acc:HGNC:3541]	0.5816	0.3198	0.5881	0.3299	0.6248	0.4069
ENSG00000152582	SPEF2	sperm flagellar 2 [Source:HGNC Symbol;Acc:HGNC:26293]	0.5805	0.04253	0.5831	0.05584	0.4192	0.2506
ENSG00000111331	OAS3	2'-5'-oligoadenylate synthetase 3 [Source:HGNC Symbol;Acc:HGNC:8088]	0.5805	0.151	0.5791	0.1146	0.3576	0.4124
ENSG00000256660	CLEC12B	C-type lectin domain family 12 member B [Source:HGNC Symbol;Acc:HGNC:31966]	0.5799	0.001597	0.583	0.002176	0.4667	0.03887
ENSG00000151725	CENPU	centromere protein U [Source:HGNC Symbol;Acc:HGNC:21348]	0.5799	0.04068	0.5807	0.06617	0.568	0.1059
ENSG00000187556	NANOS3	nanos C2HC-type zinc finger 3 [Source:HGNC Symbol;Acc:HGNC:22048]	0.579	0.2161	0.5814	0.2474	0.6289	0.2074
ENSG00000170482	SLC23A1	solute carrier family 23 member 1 [Source:HGNC Symbol;Acc:HGNC:10974]	0.5784	0.003237	0.5873	0.01157	0.5137	0.04841
ENSG00000188157	AGRN	agrin [Source:HGNC Symbol;Acc:HGNC:329]	0.5776	0.1645	0.5793	0.1519	0.3072	0.5735
ENSG00000175445	LPL	lipoprotein lipase [Source:HGNC Symbol;Acc:HGNC:6677]	0.5769	0.2825	0.5736	0.3078	0.5183	0.5186
ENSG00000166016	ABTB2	ankyrin repeat and BTB domain containing 2 [Source:HGNC Symbol;Acc:HGNC:23842]	0.5767	0.08686	0.5773	0.09883	0.4685	0.3062
ENSG00000157601	MX1	MX dynamin like GTPase 1 [Source:HGNC Symbol;Acc:HGNC:7532]	0.5763	0.1759	0.5759	0.1457	0.4077	0.3839
ENSG00000104450	SPAG1	sperm associated antigen 1 [Source:HGNC Symbol;Acc:HGNC:11212]	0.5755	0.03938	0.5794	0.04367	0.5783	0.07112
ENSG00000100068	LRP5L	LDL receptor related protein 5 like [Source:HGNC Symbol;Acc:HGNC:25323]	0.5734	0.003773	0.5758	0.004756	0.559	0.01896
ENSG00000184307	ZDHHC23	zinc finger DHHC-type containing 23 [Source:HGNC Symbol;Acc:HGNC:28654]	0.5719	0.01924	0.5749	0.03699	0.5755	0.04969
ENSG00000189195	BTBD8	BTB domain containing 8 [Source:HGNC Symbol;Acc:HGNC:21019]	0.5715	0.04128	0.5718	0.06201	0.4362	0.1912
ENSG00000114346	ECT2	epithelial cell transforming 2 [Source:HGNC Symbol;Acc:HGNC:3155]	0.5712	0.003699	0.573	0.009084	0.5012	0.03758
ENSG00000112773	TENT5A	terminal nucleotidyltransferase 5A [Source:HGNC Symbol;Acc:HGNC:18345]	0.5695	0.001365	0.571	0.00192	0.5916	0.006611
ENSG00000059378	PARP12	poly(ADP-ribose) polymerase family member 12 [Source:HGNC Symbol;Acc:HGNC:21919]	0.568	0.005627	0.5707	0.006398	0.5478	0.02013
ENSG00000111886	GABRR2	gamma-aminobutyric acid type A receptor rho2 subunit [Source:HGNC Symbol;Acc:HGNC:4091]	0.5655	0.03345	0.5666	0.03851	0.6882	0.03017
ENSG00000095397	WHRN	whirlin [Source:HGNC Symbol;Acc:HGNC:16361]	0.565	0.3278	0.5712	0.2947	0.57	0.4168
ENSG00000165046	LETM2	leucine zipper and EF-hand containing transmembrane protein 2 [Source:HGNC Symbol;Acc:HGNC:14648]	0.5642	0.0241	0.567	0.04243	0.4774	0.08992
ENSG00000171502	COL24A1	collagen type XXIV alpha 1 chain [Source:HGNC Symbol;Acc:HGNC:20821]	0.5635	0.1402	0.5653	0.1712	0.6412	0.1875
ENSG00000175087	PDIK1L	PDLIM1 interacting kinase 1 like [Source:HGNC Symbol;Acc:HGNC:18981]	0.5628	0.0167	0.5638	0.02293	0.5529	0.0869
ENSG00000146281	PM20D2	peptidase M20 domain containing 2 [Source:HGNC Symbol;Acc:HGNC:21408]	0.5613	0.000368	0.5609	0.00257	0.5228	0.00988
ENSG00000111860	CEP85L	centrosomal protein 85 like [Source:HGNC Symbol;Acc:HGNC:21638]	0.5607	0.01002	0.5631	0.01405	0.5367	0.03329
ENSG00000106034	CPED1	cadherin like and PC-esterase domain containing 1 [Source:HGNC Symbol;Acc:HGNC:26159]	0.5603	0.01129	0.5608	0.01567	0.5532	0.04923
ENSG00000151789	ZNF385D	zinc finger protein 385D [Source:HGNC Symbol;Acc:HGNC:26191]	0.5598	0.2884	0.5639	0.3078	0.5014	0.436
ENSG00000055332	EIF2AK2	eukaryotic translation initiation factor 2 alpha kinase 2 [Source:HGNC Symbol;Acc:HGNC:9437]	0.5587	0.03872	0.5601	0.04237	0.4701	0.1302
ENSG00000170500	LONRF2	LON peptidase N-terminal domain and ring finger 2 [Source:HGNC Symbol;Acc:HGNC:24788]	0.5578	0.6742	0.5032	0.788	0.2746	0.8239
ENSG00000162627	SNX7	sorting nexin 7 [Source:HGNC Symbol;Acc:HGNC:14971]	0.5564	0.5938	0.5617	0.5741	1.383	0.259
ENSG00000115956	PLEK	pleckstrin [Source:HGNC Symbol;Acc:HGNC:9070]	0.556	0.00226	0.5567	0.003024	0.6252	0.004511
ENSG00000147996	CBWD5	COBW domain containing 5 [Source:HGNC Symbol;Acc:HGNC:24584]	0.5557	0.08535	0.558	0.08437	0.333	0.3419
ENSG00000039600	SOX30	SRY-box transcription factor 30 [Source:HGNC Symbol;Acc:HGNC:30635]	0.5556	0.1052	0.5561	0.1332	0.5968	0.185
ENSG00000115392	FANCL	FA complementation group L [Source:HGNC Symbol;Acc:HGNC:20748]	0.5545	0.0113	0.5555	0.01342	0.4514	0.07803
ENSG00000111335	OAS2	2'-5'-oligoadenylate synthetase 2 [Source:HGNC Symbol;Acc:HGNC:8087]	0.5545	0.1533	0.5545	0.1197	0.2984	0.4939
ENSG00000197860	SGTB	small glutamine rich tetratricopeptide repeat containing beta [Source:HGNC Symbol;Acc:HGNC:23567]	0.5543	8.733e-06	0.5542	8.75e-05	0.5171	0.002457
ENSG00000105371	ICAM4	intercellular adhesion molecule 4 (Landsteiner-Wiener blood group) [Source:HGNC Symbol;Acc:HGNC:5347]	0.5537	0.1773	0.5552	0.235	0.8494	0.04499
ENSG00000151466	SCLT1	sodium channel and clathrin linker 1 [Source:HGNC Symbol;Acc:HGNC:26406]	0.5535	0.0007975	0.5565	0.001044	0.5382	0.004759
ENSG00000163568	AIM2	absent in melanoma 2 [Source:HGNC Symbol;Acc:HGNC:357]	0.5528	0.1803	0.5517	0.1909	0.7734	0.1852
ENSG00000186188	FFAR4	free fatty acid receptor 4 [Source:HGNC Symbol;Acc:HGNC:19061]	0.5526	0.09015	0.5531	0.123	0.4117	0.2435
ENSG00000145365	TIFA	TRAF interacting protein with forkhead associated domain [Source:HGNC Symbol;Acc:HGNC:19075]	0.552	0.1248	0.5545	0.141	0.6454	0.1465
ENSG00000255073	ZFP91-CNTF	ZFP91-CNTF readthrough (NMD candidate) [Source:HGNC Symbol;Acc:HGNC:33441]	0.5459	0.01644	0.548	0.03511	0.5904	0.04196
ENSG00000239920		novel transcript	0.5449	0.0216	0.5471	0.04499	0.4916	0.1399
ENSG00000153707	PTPRD	protein tyrosine phosphatase receptor type D [Source:HGNC Symbol;Acc:HGNC:9668]	0.5449	0.3144	0.5387	0.3768	0.3296	0.5925
ENSG00000184292	TACSTD2	tumor associated calcium signal transducer 2 [Source:HGNC Symbol;Acc:HGNC:11530]	0.5448	0.7532	0.5287	0.7362	0.1338	0.9483
ENSG00000074276	CDHR2	cadherin related family member 2 [Source:HGNC Symbol;Acc:HGNC:18231]	0.5445	0.0816	0.5461	0.1187	0.548	0.1093
ENSG00000096968	JAK2	Janus kinase 2 [Source:HGNC Symbol;Acc:HGNC:6192]	0.544	0.00474	0.5461	0.005486	0.5777	0.01064
ENSG00000178297	TMPRSS9	transmembrane serine protease 9 [Source:HGNC Symbol;Acc:HGNC:30079]	0.5435	0.0565	0.5481	0.07636	0.4734	0.1653
ENSG00000221963	APOL6	apolipoprotein L6 [Source:HGNC Symbol;Acc:HGNC:14870]	0.5432	0.05261	0.5459	0.05523	0.6048	0.06072
ENSG00000242950	ERVW-1	endogenous retrovirus group W member 1, envelope [Source:HGNC Symbol;Acc:HGNC:13525]	0.5431	0.03522	0.5462	0.0703	0.5086	0.1238
ENSG00000109805	NCAPG	non-SMC condensin I complex subunit G [Source:HGNC Symbol;Acc:HGNC:24304]	0.5424	0.002138	0.5416	0.009932	0.5214	0.02876
ENSG00000076716	GPC4	glypican 4 [Source:HGNC Symbol;Acc:HGNC:4452]	0.5413	0.1684	0.5479	0.18	0.4071	0.4447
ENSG00000167281	RBFOX3	RNA binding fox-1 homolog 3 [Source:HGNC Symbol;Acc:HGNC:27097]	0.5413	0.07936	0.5452	0.09894	0.4605	0.2898
ENSG00000132570	PCBD2	pterin-4 alpha-carbinolamine dehydratase 2 [Source:HGNC Symbol;Acc:HGNC:24474]	0.5396	0.2478	0.5388	0.31	0.3747	0.4384
ENSG00000165995	CACNB2	calcium voltage-gated channel auxiliary subunit beta 2 [Source:HGNC Symbol;Acc:HGNC:1402]	0.5389	0.001681	0.5385	0.006392	0.5659	0.009369
ENSG00000140876	NUDT7	nudix hydrolase 7 [Source:HGNC Symbol;Acc:HGNC:8054]	0.5384	0.2827	0.5401	0.2984	1.596	0.01296
ENSG00000108774	RAB5C	RAB5C, member RAS oncogene family [Source:HGNC Symbol;Acc:HGNC:9785]	0.5373	0.2403	0.5139	0.2484	-0.04428	0.9461
ENSG00000055130	CUL1	cullin 1 [Source:HGNC Symbol;Acc:HGNC:2551]	0.5366	0.02066	0.5388	0.02095	0.5356	0.043
ENSG00000139618	BRCA2	BRCA2 DNA repair associated [Source:HGNC Symbol;Acc:HGNC:1101]	0.5359	0.04122	0.5373	0.05324	0.51	0.1428
ENSG00000146263	MMS22L	MMS22 like, DNA repair protein [Source:HGNC Symbol;Acc:HGNC:21475]	0.5356	0.001511	0.5402	0.003417	0.4172	0.04331
ENSG00000126003	PLAGL2	PLAG1 like zinc finger 2 [Source:HGNC Symbol;Acc:HGNC:9047]	0.5355	0.0001581	0.5377	0.0002754	0.5722	0.002457
ENSG00000155158	TTC39B	tetratricopeptide repeat domain 39B [Source:HGNC Symbol;Acc:HGNC:23704]	0.5335	0.0003909	0.5353	0.001843	0.5284	0.006611
ENSG00000163596	ICA1L	islet cell autoantigen 1 like [Source:HGNC Symbol;Acc:HGNC:14442]	0.5332	0.04158	0.5379	0.04599	0.4461	0.1418
ENSG00000160323	ADAMTS13	ADAM metallopeptidase with thrombospondin type 1 motif 13 [Source:HGNC Symbol;Acc:HGNC:1366]	0.5324	0.03585	0.5296	0.06331	0.5935	0.05361
ENSG00000166432	ZMAT1	zinc finger matrin-type 1 [Source:HGNC Symbol;Acc:HGNC:29377]	0.5323	0.006446	0.5353	0.008651	0.429	0.05613
ENSG00000138376	BARD1	BRCA1 associated RING domain 1 [Source:HGNC Symbol;Acc:HGNC:952]	0.532	0.01643	0.5343	0.02033	0.3414	0.1707
ENSG00000107443	CCNJ	cyclin J [Source:HGNC Symbol;Acc:HGNC:23434]	0.5318	0.001956	0.5327	0.002437	0.469	0.01323
ENSG00000137807	KIF23	kinesin family member 23 [Source:HGNC Symbol;Acc:HGNC:6392]	0.5309	0.2513	0.5265	0.2823	0.3701	0.573
ENSG00000007968	E2F2	E2F transcription factor 2 [Source:HGNC Symbol;Acc:HGNC:3114]	0.5302	0.09132	0.5281	0.1135	0.6207	0.1106
ENSG00000165555	NOXRED1	NADP dependent oxidoreductase domain containing 1 [Source:HGNC Symbol;Acc:HGNC:20487]	0.53	0.03112	0.5345	0.04875	0.4755	0.102
ENSG00000183569	SERHL2	serine hydrolase like 2 [Source:HGNC Symbol;Acc:HGNC:29446]	0.5295	0.03098	0.5325	0.03751	0.3774	0.197
ENSG00000122643	NT5C3A	5'-nucleotidase, cytosolic IIIA [Source:HGNC Symbol;Acc:HGNC:17820]	0.5291	0.001008	0.53	0.002194	0.52	0.01076
ENSG00000100784	RPS6KA5	ribosomal protein S6 kinase A5 [Source:HGNC Symbol;Acc:HGNC:10434]	0.5279	0.002605	0.5325	0.004606	0.4903	0.01683
ENSG00000260097	SPDYE6	speedy/RINGO cell cycle regulator family member E6 [Source:HGNC Symbol;Acc:HGNC:35465]	0.5279	0.04732	0.5305	0.05514	0.4655	0.2177
ENSG00000160856	FCRL3	Fc receptor like 3 [Source:HGNC Symbol;Acc:HGNC:18506]	0.5278	0.2697	0.5196	0.2719	-0.06456	0.942
ENSG00000137265	IRF4	interferon regulatory factor 4 [Source:HGNC Symbol;Acc:HGNC:6119]	0.5276	0.03135	0.5328	0.03511	0.425	0.1499
ENSG00000171189	GRIK1	glutamate ionotropic receptor kainate type subunit 1 [Source:HGNC Symbol;Acc:HGNC:4579]	0.5274	0.0007457	0.5285	0.002541	0.5344	0.00988
ENSG00000120645	IQSEC3	IQ motif and Sec7 domain ArfGEF 3 [Source:HGNC Symbol;Acc:HGNC:29193]	0.5267	0.3961	0.527	0.4133	-0.4347	0.6961
ENSG00000249240		novel protein	0.526	0.1048	0.5328	0.109	0.4982	0.2181
ENSG00000132704	FCRL2	Fc receptor like 2 [Source:HGNC Symbol;Acc:HGNC:14875]	0.5259	0.2771	0.5264	0.2864	0.4327	0.5609
ENSG00000164136	IL15	interleukin 15 [Source:HGNC Symbol;Acc:HGNC:5977]	0.5258	0.03045	0.5287	0.03019	0.5221	0.05218
ENSG00000163281	GNPDA2	glucosamine-6-phosphate deaminase 2 [Source:HGNC Symbol;Acc:HGNC:21526]	0.5252	0.001125	0.5252	0.003656	0.5414	0.01112
ENSG00000138346	DNA2	DNA replication helicase/nuclease 2 [Source:HGNC Symbol;Acc:HGNC:2939]	0.5242	0.02155	0.5269	0.04269	0.4992	0.08106
ENSG00000165125	TRPV6	transient receptor potential cation channel subfamily V member 6 [Source:HGNC Symbol;Acc:HGNC:14006]	0.5239	0.2129	0.5295	0.2327	0.2738	0.6763
ENSG00000249884	RNF103-CHMP3	RNF103-CHMP3 readthrough [Source:HGNC Symbol;Acc:HGNC:38847]	0.5233	0.02055	0.5331	0.04559	0.3781	0.09054
ENSG00000176945	MUC20	mucin 20, cell surface associated [Source:HGNC Symbol;Acc:HGNC:23282]	0.523	0.2265	0.5214	0.2279	0.08283	0.9018
ENSG00000101596	SMCHD1	structural maintenance of chromosomes flexible hinge domain containing 1 [Source:HGNC Symbol;Acc:HGNC:29090]	0.5229	0.0007813	0.5236	0.001157	0.572	0.004346
ENSG00000106080	FKBP14	FKBP prolyl isomerase 14 [Source:HGNC Symbol;Acc:HGNC:18625]	0.5214	0.000368	0.5229	0.002193	0.482	0.00988
ENSG00000250264		novel protein, TAP2-HLA-DOB readthrough	0.5209	0.1071	0.5232	0.1211	0.6962	0.07711
ENSG00000142856	ITGB3BP	integrin subunit beta 3 binding protein [Source:HGNC Symbol;Acc:HGNC:6157]	0.5206	0.01974	0.5214	0.0257	0.4256	0.1246
ENSG00000165997	ARL5B	ADP ribosylation factor like GTPase 5B [Source:HGNC Symbol;Acc:HGNC:23052]	0.5203	0.02564	0.5232	0.02879	0.4496	0.09787
ENSG00000149948	HMGA2	high mobility group AT-hook 2 [Source:HGNC Symbol;Acc:HGNC:5009]	0.5196	0.03423	0.5154	0.07693	0.5428	0.09427
ENSG00000250305	TRMT9B	tRNA methyltransferase 9B (putative) [Source:HGNC Symbol;Acc:HGNC:26725]	0.5194	0.3011	0.5214	0.3726	0.4223	0.5269
ENSG00000150347	ARID5B	AT-rich interaction domain 5B [Source:HGNC Symbol;Acc:HGNC:17362]	0.5189	0.1064	0.5146	0.1185	0.4062	0.3156
ENSG00000198919	DZIP3	DAZ interacting zinc finger protein 3 [Source:HGNC Symbol;Acc:HGNC:30938]	0.5187	0.008117	0.5209	0.01626	0.4649	0.05172
ENSG00000154359	LONRF1	LON peptidase N-terminal domain and ring finger 1 [Source:HGNC Symbol;Acc:HGNC:26302]	0.5183	0.1434	0.5222	0.1167	0.5062	0.1841
ENSG00000138182	KIF20B	kinesin family member 20B [Source:HGNC Symbol;Acc:HGNC:7212]	0.5181	0.004262	0.5215	0.01077	0.468	0.03321
ENSG00000155816	FMN2	formin 2 [Source:HGNC Symbol;Acc:HGNC:14074]	0.5178	0.6023	0.4925	0.7086	-0.06208	0.9542
ENSG00000188779	SKOR1	SKI family transcriptional corepressor 1 [Source:HGNC Symbol;Acc:HGNC:21326]	0.5174	0.02782	0.5184	0.04822	0.5235	0.06867
ENSG00000197329	PELI1	pellino E3 ubiquitin protein ligase 1 [Source:HGNC Symbol;Acc:HGNC:8827]	0.5164	0.02496	0.5196	0.02639	0.5277	0.05209
ENSG00000248643	RBM14-RBM4	RBM14-RBM4 readthrough [Source:HGNC Symbol;Acc:HGNC:38840]	0.5157	0.1131	0.5188	0.1197	0.2372	0.5713
ENSG00000093167	LRRFIP2	LRR binding FLII interacting protein 2 [Source:HGNC Symbol;Acc:HGNC:6703]	0.5147	0.001774	0.5172	0.002554	0.4956	0.01076
ENSG00000244486	SCARF2	scavenger receptor class F member 2 [Source:HGNC Symbol;Acc:HGNC:19869]	0.5138	0.01248	0.5171	0.02513	0.4735	0.06303
ENSG00000111554	MDM1	Mdm1 nuclear protein [Source:HGNC Symbol;Acc:HGNC:29917]	0.5115	0.03618	0.516	0.04351	0.4978	0.08266
ENSG00000177483	RBM44	RNA binding motif protein 44 [Source:HGNC Symbol;Acc:HGNC:24756]	0.511	0.04792	0.5132	0.05185	0.3818	0.2388
ENSG00000080200	CRYBG3	crystallin beta-gamma domain containing 3 [Source:HGNC Symbol;Acc:HGNC:34427]	0.5098	0.006446	0.513	0.007871	0.4954	0.01872
ENSG00000214279	SCART1	scavenger receptor family member expressed on T cells 1 [Source:HGNC Symbol;Acc:HGNC:32411]	0.5092	0.1246	0.5105	0.1569	0.5337	0.1476
ENSG00000228696	ARL17B	ADP ribosylation factor like GTPase 17B [Source:HGNC Symbol;Acc:HGNC:32387]	0.5087	0.2396	0.5063	0.2361	0.1035	0.8729
ENSG00000196436	NPIPB15	nuclear pore complex interacting protein family member B15 [Source:HGNC Symbol;Acc:HGNC:34409]	0.5084	0.1726	0.5126	0.1671	0.5395	0.2728
ENSG00000143178	TBX19	T-box transcription factor 19 [Source:HGNC Symbol;Acc:HGNC:11596]	0.5083	0.0001965	0.5149	0.0008376	0.4159	0.01202
ENSG00000213949	ITGA1	integrin subunit alpha 1 [Source:HGNC Symbol;Acc:HGNC:6134]	0.5082	0.1826	0.5045	0.2042	0.3671	0.4716
ENSG00000196684	HSH2D	hematopoietic SH2 domain containing [Source:HGNC Symbol;Acc:HGNC:24920]	0.5075	0.02762	0.5087	0.03075	0.4832	0.06484
ENSG00000143156	NME7	NME/NM23 family member 7 [Source:HGNC Symbol;Acc:HGNC:20461]	0.5072	0.0107	0.5111	0.01905	0.4811	0.04761
ENSG00000006634	DBF4	DBF4 zinc finger [Source:HGNC Symbol;Acc:HGNC:17364]	0.5062	0.02725	0.5091	0.03335	0.4938	0.06009
ENSG00000114554	PLXNA1	plexin A1 [Source:HGNC Symbol;Acc:HGNC:9099]	0.5046	0.275	0.5046	0.2544	0.00594	0.9932
ENSG00000097046	CDC7	cell division cycle 7 [Source:HGNC Symbol;Acc:HGNC:1745]	0.5039	0.001555	0.5045	0.008869	0.4691	0.01251
ENSG00000011105	TSPAN9	tetraspanin 9 [Source:HGNC Symbol;Acc:HGNC:21640]	0.5032	0.3542	0.5002	0.3217	-0.00343	0.9952
ENSG00000138134	STAMBPL1	STAM binding protein like 1 [Source:HGNC Symbol;Acc:HGNC:24105]	0.5017	0.1169	0.5029	0.1166	0.3218	0.3959
ENSG00000122417	ODF2L	outer dense fiber of sperm tails 2 like [Source:HGNC Symbol;Acc:HGNC:29225]	0.5015	0.01531	0.5054	0.01902	0.3207	0.1754
ENSG00000123739	PLA2G12A	phospholipase A2 group XIIA [Source:HGNC Symbol;Acc:HGNC:18554]	0.5015	0.0289	0.5022	0.05711	0.5496	0.04745
ENSG00000115419	GLS	glutaminase [Source:HGNC Symbol;Acc:HGNC:4331]	0.5009	0.06051	0.5049	0.0636	0.4602	0.1118
ENSG00000132613	MTSS2	MTSS I-BAR domain containing 2 [Source:HGNC Symbol;Acc:HGNC:25094]	0.5008	0.03944	0.5039	0.05167	0.4987	0.08142
ENSG00000029363	BCLAF1	BCL2 associated transcription factor 1 [Source:HGNC Symbol;Acc:HGNC:16863]	0.5007	0.009138	0.5029	0.01079	0.5148	0.023
ENSG00000142089	IFITM3	interferon induced transmembrane protein 3 [Source:HGNC Symbol;Acc:HGNC:5414]	0.5	0.3707	0.4976	0.2672	0.1523	0.7996
ENSG00000110436	SLC1A2	solute carrier family 1 member 2 [Source:HGNC Symbol;Acc:HGNC:10940]	0.4995	0.1387	0.5019	0.166	0.4505	0.2192
ENSG00000172594	SMPDL3A	sphingomyelin phosphodiesterase acid like 3A [Source:HGNC Symbol;Acc:HGNC:17389]	0.4991	0.02143	0.4994	0.02532	0.5122	0.05635
ENSG00000148154	UGCG	UDP-glucose ceramide glucosyltransferase [Source:HGNC Symbol;Acc:HGNC:12524]	0.499	0.005672	0.5007	0.01189	0.5274	0.01522
ENSG00000196839	ADA	adenosine deaminase [Source:HGNC Symbol;Acc:HGNC:186]	0.4979	0.09995	0.5049	0.09788	0.3693	0.3177
ENSG00000148737	TCF7L2	transcription factor 7 like 2 [Source:HGNC Symbol;Acc:HGNC:11641]	0.4973	0.0241	0.5006	0.02397	0.5744	0.02231
ENSG00000137760	ALKBH8	alkB homolog 8, tRNA methyltransferase [Source:HGNC Symbol;Acc:HGNC:25189]	0.4972	0.002236	0.5007	0.004431	0.4408	0.02203
ENSG00000095015	MAP3K1	mitogen-activated protein kinase kinase kinase 1 [Source:HGNC Symbol;Acc:HGNC:6848]	0.4971	5.889e-05	0.4977	0.0002393	0.5602	0.002156
ENSG00000162747	FCGR3B	Fc fragment of IgG receptor IIIb [Source:HGNC Symbol;Acc:HGNC:3620]	0.4968	0.2087	0.4953	0.2176	0.2743	0.623
ENSG00000165185	KIAA1958	KIAA1958 [Source:HGNC Symbol;Acc:HGNC:23427]	0.4966	0.01356	0.4975	0.01814	0.4343	0.076
ENSG00000118298	CA14	carbonic anhydrase 14 [Source:HGNC Symbol;Acc:HGNC:1372]	0.4963	0.01586	0.4981	0.02832	0.5044	0.05361
ENSG00000158987	RAPGEF6	Rap guanine nucleotide exchange factor 6 [Source:HGNC Symbol;Acc:HGNC:20655]	0.4956	0.01844	0.4969	0.03247	0.4556	0.08532
ENSG00000155545	MIER3	MIER family member 3 [Source:HGNC Symbol;Acc:HGNC:26678]	0.4947	0.002692	0.4976	0.006679	0.4637	0.0216
ENSG00000176809	LRRC37A3	leucine rich repeat containing 37 member A3 [Source:HGNC Symbol;Acc:HGNC:32427]	0.4947	0.05834	0.4992	0.07466	0.4361	0.1839
ENSG00000158457	TSPAN33	tetraspanin 33 [Source:HGNC Symbol;Acc:HGNC:28743]	0.4946	0.0845	0.4984	0.09894	0.606	0.08254
ENSG00000081041	CXCL2	C-X-C motif chemokine ligand 2 [Source:HGNC Symbol;Acc:HGNC:4603]	0.4937	0.3257	0.4962	0.3288	0.087	0.9085
ENSG00000121671	CRY2	cryptochrome circadian regulator 2 [Source:HGNC Symbol;Acc:HGNC:2385]	0.49	0.04952	0.4956	0.05078	0.469	0.09459
ENSG00000034533	ASTE1	asteroid homolog 1 [Source:HGNC Symbol;Acc:HGNC:25021]	0.4894	0.006193	0.4905	0.01405	0.5113	0.02756
ENSG00000175048	ZDHHC14	zinc finger DHHC-type containing 14 [Source:HGNC Symbol;Acc:HGNC:20341]	0.4892	0.0377	0.4931	0.05503	0.6138	0.03709
ENSG00000112299	VNN1	vanin 1 [Source:HGNC Symbol;Acc:HGNC:12705]	0.4887	0.1072	0.4859	0.1185	0.5251	0.1127
ENSG00000095574	IKZF5	IKAROS family zinc finger 5 [Source:HGNC Symbol;Acc:HGNC:14283]	0.4884	0.01218	0.491	0.01552	0.4059	0.05613
ENSG00000131013	PPIL4	peptidylprolyl isomerase like 4 [Source:HGNC Symbol;Acc:HGNC:15702]	0.4883	0.01665	0.492	0.01822	0.3687	0.09888
ENSG00000161040	FBXL13	F-box and leucine rich repeat protein 13 [Source:HGNC Symbol;Acc:HGNC:21658]	0.4882	0.06476	0.4912	0.08533	0.3947	0.2348
ENSG00000150048	CLEC1A	C-type lectin domain family 1 member A [Source:HGNC Symbol;Acc:HGNC:24355]	0.4879	0.00318	0.4897	0.008899	0.4448	0.03758
ENSG00000249141		novel protein	0.4879	0.01218	0.4923	0.01905	0.3328	0.1592
ENSG00000054392	HHAT	hedgehog acyltransferase [Source:HGNC Symbol;Acc:HGNC:18270]	0.4875	0.001392	0.4921	0.004099	0.4657	0.01108
ENSG00000160588	MPZL3	myelin protein zero like 3 [Source:HGNC Symbol;Acc:HGNC:27279]	0.4875	0.004955	0.4864	0.009543	0.4902	0.02466
ENSG00000152760	TCTEX1D1	Tctex1 domain containing 1 [Source:HGNC Symbol;Acc:HGNC:26882]	0.4874	0.4466	0.4844	0.4875	0.6192	0.3723
ENSG00000141096	DPEP3	dipeptidase 3 [Source:HGNC Symbol;Acc:HGNC:23029]	0.4855	0.1396	0.4888	0.1629	0.6001	0.1292
ENSG00000101412	E2F1	E2F transcription factor 1 [Source:HGNC Symbol;Acc:HGNC:3113]	0.4854	0.1336	0.4824	0.1819	0.5415	0.1485
ENSG00000108679	LGALS3BP	galectin 3 binding protein [Source:HGNC Symbol;Acc:HGNC:6564]	0.4853	0.3177	0.4839	0.2887	0.2343	0.6969
ENSG00000015153	YAF2	YY1 associated factor 2 [Source:HGNC Symbol;Acc:HGNC:17363]	0.4845	0.01644	0.4888	0.01879	0.3882	0.08462
ENSG00000118965	WDR35	WD repeat domain 35 [Source:HGNC Symbol;Acc:HGNC:29250]	0.4838	0.03021	0.4876	0.04811	0.3824	0.1642
ENSG00000167220	HDHD2	haloacid dehalogenase like hydrolase domain containing 2 [Source:HGNC Symbol;Acc:HGNC:25364]	0.4838	0.1276	0.4827	0.1626	0.455	0.2433
ENSG00000172322	CLEC12A	C-type lectin domain family 12 member A [Source:HGNC Symbol;Acc:HGNC:31713]	0.4837	0.02072	0.4833	0.02209	0.4995	0.04876
ENSG00000105655	ISYNA1	inositol-3-phosphate synthase 1 [Source:HGNC Symbol;Acc:HGNC:29821]	0.4827	0.1096	0.49	0.1089	0.3699	0.2932
ENSG00000091986	CCDC80	coiled-coil domain containing 80 [Source:HGNC Symbol;Acc:HGNC:30649]	0.482	0.115	0.4821	0.1336	0.3387	0.4026
ENSG00000162614	NEXN	nexilin F-actin binding protein [Source:HGNC Symbol;Acc:HGNC:29557]	0.482	0.1569	0.4818	0.1684	0.3207	0.4939
ENSG00000065243	PKN2	protein kinase N2 [Source:HGNC Symbol;Acc:HGNC:9406]	0.4817	0.005627	0.4841	0.007259	0.4738	0.01775
ENSG00000105048	TNNT1	troponin T1, slow skeletal type [Source:HGNC Symbol;Acc:HGNC:11948]	0.4809	0.21	0.4768	0.1811	0.2922	0.5346
ENSG00000276085	CCL3L1	C-C motif chemokine ligand 3 like 3 [Source:HGNC Symbol;Acc:HGNC:30554]	0.4797	0.4456	0.4898	0.4132	0.2978	0.7262
ENSG00000174123	TLR10	toll like receptor 10 [Source:HGNC Symbol;Acc:HGNC:15634]	0.4792	0.06191	0.4818	0.1019	0.4894	0.1677
ENSG00000117281	CD160	CD160 molecule [Source:HGNC Symbol;Acc:HGNC:17013]	0.4776	0.03629	0.4819	0.06148	0.4189	0.1164
ENSG00000100628	ASB2	ankyrin repeat and SOCS box containing 2 [Source:HGNC Symbol;Acc:HGNC:16012]	0.4774	0.1419	0.4781	0.1423	0.6486	0.09863
ENSG00000198924	DCLRE1A	DNA cross-link repair 1A [Source:HGNC Symbol;Acc:HGNC:17660]	0.4773	0.1426	0.4748	0.198	0.6121	0.09638
ENSG00000078487	ZCWPW1	zinc finger CW-type and PWWP domain containing 1 [Source:HGNC Symbol;Acc:HGNC:23486]	0.4771	0.009138	0.4802	0.009932	0.398	0.05125
ENSG00000163644	PPM1K	protein phosphatase, Mg2+/Mn2+ dependent 1K [Source:HGNC Symbol;Acc:HGNC:25415]	0.4767	0.02024	0.4789	0.02713	0.4313	0.07583
ENSG00000111880	RNGTT	RNA guanylyltransferase and 5'-phosphatase [Source:HGNC Symbol;Acc:HGNC:10073]	0.4764	0.03759	0.4795	0.04509	0.4168	0.1098
ENSG00000196628	TCF4	transcription factor 4 [Source:HGNC Symbol;Acc:HGNC:11634]	0.4758	0.004364	0.478	0.007479	0.4337	0.03131
ENSG00000163535	SGO2	shugoshin 2 [Source:HGNC Symbol;Acc:HGNC:30812]	0.4756	0.07062	0.485	0.1137	0.3263	0.3309
ENSG00000009413	REV3L	REV3 like, DNA directed polymerase zeta catalytic subunit [Source:HGNC Symbol;Acc:HGNC:9968]	0.4752	0.02846	0.479	0.03511	0.3914	0.1146
ENSG00000143858	SYT2	synaptotagmin 2 [Source:HGNC Symbol;Acc:HGNC:11510]	0.4746	0.1304	0.4752	0.1557	0.3658	0.2888
ENSG00000075945	KIFAP3	kinesin associated protein 3 [Source:HGNC Symbol;Acc:HGNC:17060]	0.4743	0.01472	0.4773	0.02274	0.4372	0.05572
ENSG00000104921	FCER2	Fc fragment of IgE receptor II [Source:HGNC Symbol;Acc:HGNC:3612]	0.4741	0.2963	0.4855	0.2775	0.4423	0.3839
ENSG00000168283	BMI1	BMI1 proto-oncogene, polycomb ring finger [Source:HGNC Symbol;Acc:HGNC:1066]	0.474	0.03273	0.4752	0.04571	0.4105	0.1256
ENSG00000169621	APLF	aprataxin and PNKP like factor [Source:HGNC Symbol;Acc:HGNC:28724]	0.4738	0.01974	0.4764	0.03541	0.4621	0.03758
ENSG00000286239		novel protein, WDFY1-AP1S3 readthrough	0.4737	0.05023	0.4747	0.05766	0.3331	0.2232
ENSG00000132541	RIDA	reactive intermediate imine deaminase A homolog [Source:HGNC Symbol;Acc:HGNC:16897]	0.4733	0.06597	0.4728	0.09785	0.3831	0.259
ENSG00000131730	CKMT2	creatine kinase, mitochondrial 2 [Source:HGNC Symbol;Acc:HGNC:1996]	0.4725	0.2409	0.4652	0.2413	0.1551	0.765
ENSG00000106524	ANKMY2	ankyrin repeat and MYND domain containing 2 [Source:HGNC Symbol;Acc:HGNC:25370]	0.4721	0.0006057	0.4731	0.003024	0.4478	0.01243
ENSG00000144445	KANSL1L	KAT8 regulatory NSL complex subunit 1 like [Source:HGNC Symbol;Acc:HGNC:26310]	0.472	0.0005641	0.4744	0.002144	0.4353	0.01064
ENSG00000072401	UBE2D1	ubiquitin conjugating enzyme E2 D1 [Source:HGNC Symbol;Acc:HGNC:12474]	0.4715	0.02405	0.4733	0.02727	0.4458	0.04009
ENSG00000118961	LDAH	lipid droplet associated hydrolase [Source:HGNC Symbol;Acc:HGNC:26145]	0.4704	0.002362	0.4745	0.007396	0.4077	0.04
ENSG00000163608	NEPRO	nucleolus and neural progenitor protein [Source:HGNC Symbol;Acc:HGNC:24496]	0.4702	0.003787	0.475	0.008323	0.3784	0.05051
ENSG00000127337	YEATS4	YEATS domain containing 4 [Source:HGNC Symbol;Acc:HGNC:24859]	0.4697	0.05908	0.4736	0.06904	0.4078	0.2011
ENSG00000145736	GTF2H2	general transcription factor IIH subunit 2 [Source:HGNC Symbol;Acc:HGNC:4656]	0.4696	0.1387	0.4724	0.1605	0.3506	0.4095
ENSG00000269179		novel protein	0.4692	0.5462	0.4721	0.5095	1.286	0.1701
ENSG00000183486	MX2	MX dynamin like GTPase 2 [Source:HGNC Symbol;Acc:HGNC:7533]	0.4689	0.158	0.4696	0.1267	0.3149	0.3583
ENSG00000078053	AMPH	amphiphysin [Source:HGNC Symbol;Acc:HGNC:471]	0.468	0.4653	0.472	0.5178	-0.6215	0.3605
ENSG00000138050	THUMPD2	THUMP domain containing 2 [Source:HGNC Symbol;Acc:HGNC:14890]	0.4675	0.03273	0.4712	0.03592	0.4076	0.09275
ENSG00000105708	ZNF14	zinc finger protein 14 [Source:HGNC Symbol;Acc:HGNC:12924]	0.467	0.2184	0.4737	0.2196	0.4117	0.349
ENSG00000179044	EXOC3L1	exocyst complex component 3 like 1 [Source:HGNC Symbol;Acc:HGNC:27540]	0.4669	0.2764	0.4688	0.2912	0.3587	0.5244
ENSG00000187860	CCDC157	coiled-coil domain containing 157 [Source:HGNC Symbol;Acc:HGNC:33854]	0.4667	0.02651	0.4716	0.04048	0.3595	0.1309
ENSG00000143786	CNIH3	cornichon family AMPA receptor auxiliary protein 3 [Source:HGNC Symbol;Acc:HGNC:26802]	0.4662	0.04055	0.4623	0.09101	0.4907	0.07004
ENSG00000171448	ZBTB26	zinc finger and BTB domain containing 26 [Source:HGNC Symbol;Acc:HGNC:23383]	0.4641	0.03247	0.4658	0.04265	0.4717	0.07521
ENSG00000151005	TKTL2	transketolase like 2 [Source:HGNC Symbol;Acc:HGNC:25313]	0.4641	0.06572	0.4673	0.09394	0.3911	0.1913
ENSG00000179988	PSTK	phosphoseryl-tRNA kinase [Source:HGNC Symbol;Acc:HGNC:28578]	0.4638	0.01269	0.4672	0.02407	0.3873	0.07521
ENSG00000135114	OASL	2'-5'-oligoadenylate synthetase like [Source:HGNC Symbol;Acc:HGNC:8090]	0.4632	0.2823	0.463	0.2544	0.1773	0.7495
ENSG00000166750	SLFN5	schlafen family member 5 [Source:HGNC Symbol;Acc:HGNC:28286]	0.4621	0.272	0.4697	0.2371	0.355	0.4469
ENSG00000129951	PLPPR3	phospholipid phosphatase related 3 [Source:HGNC Symbol;Acc:HGNC:23497]	0.4616	0.2225	0.4682	0.2445	0.344	0.478
ENSG00000163406	SLC15A2	solute carrier family 15 member 2 [Source:HGNC Symbol;Acc:HGNC:10921]	0.4614	0.006252	0.463	0.01236	0.475	0.01327
ENSG00000087903	RFX2	regulatory factor X2 [Source:HGNC Symbol;Acc:HGNC:9983]	0.4613	0.07615	0.4666	0.08002	0.3743	0.2285
ENSG00000177606	JUN	Jun proto-oncogene, AP-1 transcription factor subunit [Source:HGNC Symbol;Acc:HGNC:6204]	0.4613	0.3704	0.4592	0.3652	0.5005	0.3516
ENSG00000184445	KNTC1	kinetochore associated 1 [Source:HGNC Symbol;Acc:HGNC:17255]	0.4608	0.009611	0.4647	0.01632	0.3962	0.05339
ENSG00000164118	CEP44	centrosomal protein 44 [Source:HGNC Symbol;Acc:HGNC:29356]	0.4604	0.001367	0.4633	0.004917	0.412	0.01595
ENSG00000187118	CMC1	C-X9-C motif containing 1 [Source:HGNC Symbol;Acc:HGNC:28783]	0.46	0.008631	0.4635	0.01437	0.3593	0.08381
ENSG00000152784	PRDM8	PR/SET domain 8 [Source:HGNC Symbol;Acc:HGNC:13993]	0.46	0.2513	0.4667	0.2719	0.3318	0.5065
ENSG00000277957	SENP3-EIF4A1	SENP3-EIF4A1 readthrough (NMD candidate) [Source:HGNC Symbol;Acc:HGNC:49182]	0.46	0.1291	0.4664	0.1593	0.4053	0.298
ENSG00000145246	ATP10D	ATPase phospholipid transporting 10D (putative) [Source:HGNC Symbol;Acc:HGNC:13549]	0.4595	0.0001548	0.4604	0.0003877	0.4108	0.006611
ENSG00000182287	AP1S2	adaptor related protein complex 1 subunit sigma 2 [Source:HGNC Symbol;Acc:HGNC:560]	0.4591	0.007096	0.4595	0.008873	0.4266	0.03531
ENSG00000104375	STK3	serine/threonine kinase 3 [Source:HGNC Symbol;Acc:HGNC:11406]	0.4587	0.002458	0.4608	0.00457	0.3928	0.02632
ENSG00000048342	CC2D2A	coiled-coil and C2 domain containing 2A [Source:HGNC Symbol;Acc:HGNC:29253]	0.458	0.07174	0.4584	0.08542	0.5153	0.08266
ENSG00000091651	ORC6	origin recognition complex subunit 6 [Source:HGNC Symbol;Acc:HGNC:17151]	0.4577	0.08781	0.4581	0.1412	0.4494	0.1918
ENSG00000133302	SLF1	SMC5-SMC6 complex localization factor 1 [Source:HGNC Symbol;Acc:HGNC:25408]	0.4577	0.002859	0.4607	0.007378	0.4206	0.02106
ENSG00000107890	ANKRD26	ankyrin repeat domain 26 [Source:HGNC Symbol;Acc:HGNC:29186]	0.4576	0.0002332	0.459	0.002888	0.4124	0.009032
ENSG00000181847	TIGIT	T cell immunoreceptor with Ig and ITIM domains [Source:HGNC Symbol;Acc:HGNC:26838]	0.4574	0.3705	0.4554	0.3898	0.1798	0.7766
ENSG00000042317		spermatogenesis associated 7 [Source:NCBI gene;Acc:55812]	0.4572	0.05929	0.4593	0.08594	0.4477	0.1335
ENSG00000093134	VNN3	vanin 3 [Source:HGNC Symbol;Acc:HGNC:16431]	0.4562	0.1617	0.4516	0.1729	0.2003	0.6625
ENSG00000185565	LSAMP	limbic system associated membrane protein [Source:HGNC Symbol;Acc:HGNC:6705]	0.4557	0.4548	0.459	0.5829	0.2974	0.6895
ENSG00000180113	TDRD6	tudor domain containing 6 [Source:HGNC Symbol;Acc:HGNC:21339]	0.4555	0.2698	0.4566	0.2782	0.833	0.1292
ENSG00000101773	RBBP8	RB binding protein 8, endonuclease [Source:HGNC Symbol;Acc:HGNC:9891]	0.4551	0.003912	0.4553	0.006716	0.387	0.04331
ENSG00000145241	CENPC	centromere protein C [Source:HGNC Symbol;Acc:HGNC:1854]	0.4548	0.06107	0.4582	0.0636	0.4157	0.1121
ENSG00000185507	IRF7	interferon regulatory factor 7 [Source:HGNC Symbol;Acc:HGNC:6122]	0.4548	0.2205	0.4529	0.2004	0.2191	0.6065
ENSG00000099725	PRKY	protein kinase Y-linked (pseudogene) [Source:HGNC Symbol;Acc:HGNC:9444]	0.4536	0.5175	0.4585	0.4927	0.7295	0.5391
ENSG00000170385	SLC30A1	solute carrier family 30 member 1 [Source:HGNC Symbol;Acc:HGNC:11012]	0.4536	0.006126	0.4523	0.008658	0.4475	0.02358
ENSG00000174010	KLHL15	kelch like family member 15 [Source:HGNC Symbol;Acc:HGNC:29347]	0.4534	0.01588	0.455	0.02317	0.5061	0.02619
ENSG00000174842	GLMN	glomulin, FKBP associated protein [Source:HGNC Symbol;Acc:HGNC:14373]	0.4534	0.04045	0.4558	0.0481	0.3131	0.1957
ENSG00000179331	RAB39A	RAB39A, member RAS oncogene family [Source:HGNC Symbol;Acc:HGNC:16521]	0.4529	0.02968	0.455	0.03788	0.4101	0.1056
ENSG00000213064	SFT2D2	SFT2 domain containing 2 [Source:HGNC Symbol;Acc:HGNC:25140]	0.452	0.005672	0.4541	0.007871	0.4882	0.01064
ENSG00000132801	ZSWIM3	zinc finger SWIM-type containing 3 [Source:HGNC Symbol;Acc:HGNC:16157]	0.4515	0.07032	0.4504	0.124	0.4746	0.1166
ENSG00000177182	CLVS1	clavesin 1 [Source:HGNC Symbol;Acc:HGNC:23139]	0.4515	0.1599	0.4448	0.1682	0.06929	0.8494
ENSG00000067048	DDX3Y	DEAD-box helicase 3 Y-linked [Source:HGNC Symbol;Acc:HGNC:2699]	0.451	0.6744	0.4551	0.6464	1.556	0.4485
ENSG00000138166	DUSP5	dual specificity phosphatase 5 [Source:HGNC Symbol;Acc:HGNC:3071]	0.451	0.1471	0.4529	0.1595	0.4802	0.2023
ENSG00000185261	KIAA0825	KIAA0825 [Source:HGNC Symbol;Acc:HGNC:28532]	0.4507	0.02655	0.4509	0.04875	0.4397	0.06438
ENSG00000116544	DLGAP3	DLG associated protein 3 [Source:HGNC Symbol;Acc:HGNC:30368]	0.4496	0.304	0.4489	0.3189	0.1656	0.7831
ENSG00000080298	RFX3	regulatory factor X3 [Source:HGNC Symbol;Acc:HGNC:9984]	0.4493	0.01576	0.4525	0.02047	0.3574	0.0868
ENSG00000143919	CAMKMT	calmodulin-lysine N-methyltransferase [Source:HGNC Symbol;Acc:HGNC:26276]	0.4488	0.01992	0.4505	0.02832	0.4047	0.05726
ENSG00000185305	ARL15	ADP ribosylation factor like GTPase 15 [Source:HGNC Symbol;Acc:HGNC:25945]	0.4486	0.006529	0.451	0.01255	0.4195	0.03126
ENSG00000100211	CBY1	chibby family member 1, beta catenin antagonist [Source:HGNC Symbol;Acc:HGNC:1307]	0.4482	0.09185	0.4529	0.1199	0.3729	0.2779
ENSG00000156869	FRRS1	ferric chelate reductase 1 [Source:HGNC Symbol;Acc:HGNC:27622]	0.4479	0.03826	0.4485	0.05078	0.4325	0.09448
ENSG00000070961	ATP2B1	ATPase plasma membrane Ca2+ transporting 1 [Source:HGNC Symbol;Acc:HGNC:814]	0.4475	0.2406	0.4527	0.1964	0.5955	0.1352
ENSG00000049768	FOXP3	forkhead box P3 [Source:HGNC Symbol;Acc:HGNC:6106]	0.447	0.1232	0.4505	0.156	0.5377	0.07015
ENSG00000139133	ALG10	ALG10 alpha-1,2-glucosyltransferase [Source:HGNC Symbol;Acc:HGNC:23162]	0.447	0.01894	0.4536	0.04711	0.3834	0.1362
ENSG00000166546	BEAN1	brain expressed associated with NEDD4 1 [Source:HGNC Symbol;Acc:HGNC:24160]	0.4465	0.1322	0.4507	0.1416	0.4718	0.155
ENSG00000115525	ST3GAL5	ST3 beta-galactoside alpha-2,3-sialyltransferase 5 [Source:HGNC Symbol;Acc:HGNC:10872]	0.4463	0.02055	0.4465	0.0205	0.4186	0.05889
ENSG00000241106	HLA-DOB	major histocompatibility complex, class II, DO beta [Source:HGNC Symbol;Acc:HGNC:4937]	0.4457	0.2143	0.4455	0.2188	0.5545	0.1757
ENSG00000249437	NAIP	NLR family apoptosis inhibitory protein [Source:HGNC Symbol;Acc:HGNC:7634]	0.4454	0.02707	0.4469	0.03247	0.4069	0.09576
ENSG00000036054	TBC1D23	TBC1 domain family member 23 [Source:HGNC Symbol;Acc:HGNC:25622]	0.4446	0.09103	0.4482	0.0938	0.4042	0.1499
ENSG00000152061	RABGAP1L	RAB GTPase activating protein 1 like [Source:HGNC Symbol;Acc:HGNC:24663]	0.4446	4.067e-05	0.4471	0.0002393	0.4171	0.00328
ENSG00000184343	SRPK3	SRSF protein kinase 3 [Source:HGNC Symbol;Acc:HGNC:11402]	0.4443	0.04055	0.4345	0.1054	0.5097	0.05513
ENSG00000178177	LCORL	ligand dependent nuclear receptor corepressor like [Source:HGNC Symbol;Acc:HGNC:30776]	0.4436	0.002605	0.4463	0.005127	0.3914	0.02363
ENSG00000172167	MTBP	MDM2 binding protein [Source:HGNC Symbol;Acc:HGNC:7417]	0.4436	0.01989	0.4449	0.02829	0.4426	0.03482
ENSG00000127081	ZNF484	zinc finger protein 484 [Source:HGNC Symbol;Acc:HGNC:23385]	0.4435	0.03903	0.4479	0.05148	0.4282	0.0808
ENSG00000079335	CDC14A	cell division cycle 14A [Source:HGNC Symbol;Acc:HGNC:1718]	0.4434	0.009794	0.4458	0.0135	0.3804	0.04725
ENSG00000131876	SNRPA1	small nuclear ribonucleoprotein polypeptide A' [Source:HGNC Symbol;Acc:HGNC:11152]	0.4432	0.02993	0.4466	0.03	0.3784	0.08145
ENSG00000196116	TDRD7	tudor domain containing 7 [Source:HGNC Symbol;Acc:HGNC:30831]	0.4427	0.002286	0.4433	0.003606	0.3842	0.02916
ENSG00000117834	SLC5A9	solute carrier family 5 member 9 [Source:HGNC Symbol;Acc:HGNC:22146]	0.4424	0.183	0.446	0.1973	0.5603	0.1246
ENSG00000139187	KLRG1	killer cell lectin like receptor G1 [Source:HGNC Symbol;Acc:HGNC:6380]	0.4421	0.3703	0.4484	0.3607	0.3214	0.6555
ENSG00000105889	STEAP1B	STEAP family member 1B [Source:HGNC Symbol;Acc:HGNC:41907]	0.4419	0.1348	0.4385	0.1539	0.272	0.4452
ENSG00000129538	RNASE1	ribonuclease A family member 1, pancreatic [Source:HGNC Symbol;Acc:HGNC:10044]	0.4419	0.4891	0.4389	0.5218	-0.1105	0.91
ENSG00000093000	NUP50	nucleoporin 50 [Source:HGNC Symbol;Acc:HGNC:8065]	0.4417	0.02019	0.4425	0.02149	0.4076	0.07803
ENSG00000119927	GPAM	glycerol-3-phosphate acyltransferase, mitochondrial [Source:HGNC Symbol;Acc:HGNC:24865]	0.4408	0.03434	0.4442	0.05694	0.3706	0.1246
ENSG00000149311	ATM	ATM serine/threonine kinase [Source:HGNC Symbol;Acc:HGNC:795]	0.4405	0.0236	0.4425	0.02639	0.364	0.08381
ENSG00000170509	HSD17B13	hydroxysteroid 17-beta dehydrogenase 13 [Source:HGNC Symbol;Acc:HGNC:18685]	0.4405	0.1051	0.442	0.1296	0.3709	0.2934
ENSG00000138035	PNPT1	polyribonucleotide nucleotidyltransferase 1 [Source:HGNC Symbol;Acc:HGNC:23166]	0.4402	0.08628	0.4407	0.08935	0.346	0.2151
ENSG00000197013	ZNF429	zinc finger protein 429 [Source:HGNC Symbol;Acc:HGNC:20817]	0.4402	0.2734	0.4405	0.2777	0.502	0.4015
ENSG00000244405	ETV5	ETS variant transcription factor 5 [Source:HGNC Symbol;Acc:HGNC:3494]	0.4402	0.2733	0.4489	0.2637	0.153	0.7785
ENSG00000089127	OAS1	2'-5'-oligoadenylate synthetase 1 [Source:HGNC Symbol;Acc:HGNC:8086]	0.44	0.2256	0.439	0.198	0.2043	0.6367
ENSG00000139324	TMTC3	transmembrane O-mannosyltransferase targeting cadherins 3 [Source:HGNC Symbol;Acc:HGNC:26899]	0.4398	0.02181	0.4445	0.03637	0.3389	0.1108
ENSG00000205236		novel protein, UPK3BL-RASA4 readthrough	0.4396	0.09132	0.4434	0.09728	0.2838	0.4151
ENSG00000183161	FANCF	FA complementation group F [Source:HGNC Symbol;Acc:HGNC:3587]	0.4395	0.07329	0.4387	0.1053	0.5505	0.09678
ENSG00000101695	RNF125	ring finger protein 125 [Source:HGNC Symbol;Acc:HGNC:21150]	0.4388	0.04952	0.4414	0.06124	0.4963	0.05461
ENSG00000089177	KIF16B	kinesin family member 16B [Source:HGNC Symbol;Acc:HGNC:15869]	0.438	0.02667	0.4408	0.03631	0.3862	0.1117
ENSG00000213066	FGFR1OP	FGFR1 oncogene partner [Source:HGNC Symbol;Acc:HGNC:17012]	0.4374	0.06798	0.4422	0.07417	0.2817	0.3437
ENSG00000131979	GCH1	GTP cyclohydrolase 1 [Source:HGNC Symbol;Acc:HGNC:4193]	0.4364	0.03259	0.4393	0.0331	0.4182	0.0563
ENSG00000267645		novel protein, POLR2J2-UPK3BL readthrough	0.4352	0.2074	0.4391	0.2179	0.2868	0.6073
ENSG00000171365	CLCN5	chloride voltage-gated channel 5 [Source:HGNC Symbol;Acc:HGNC:2023]	0.4344	0.001433	0.4364	0.002591	0.4032	0.008471
ENSG00000198707	CEP290	centrosomal protein 290 [Source:HGNC Symbol;Acc:HGNC:29021]	0.4344	0.03033	0.4373	0.04177	0.4771	0.03321
ENSG00000173933	RBM4	RNA binding motif protein 4 [Source:HGNC Symbol;Acc:HGNC:9901]	0.4343	0.08536	0.4394	0.09326	0.2831	0.3367
ENSG00000137831	UACA	uveal autoantigen with coiled-coil domains and ankyrin repeats [Source:HGNC Symbol;Acc:HGNC:15947]	0.434	0.2125	0.4376	0.2159	0.3161	0.4546
ENSG00000026950	BTN3A1	butyrophilin subfamily 3 member A1 [Source:HGNC Symbol;Acc:HGNC:1138]	0.4339	0.03112	0.4376	0.03136	0.3775	0.09744
ENSG00000177485	ZBTB33	zinc finger and BTB domain containing 33 [Source:HGNC Symbol;Acc:HGNC:16682]	0.4337	0.002065	0.4358	0.004048	0.4105	0.01064
ENSG00000241058	NSUN6	NOP2/Sun RNA methyltransferase 6 [Source:HGNC Symbol;Acc:HGNC:23529]	0.4336	0.002147	0.435	0.007684	0.4396	0.01076
ENSG00000167676	PLIN4	perilipin 4 [Source:HGNC Symbol;Acc:HGNC:29393]	0.4334	0.1358	0.4385	0.1525	0.3194	0.3808
ENSG00000106070	GRB10	growth factor receptor bound protein 10 [Source:HGNC Symbol;Acc:HGNC:4564]	0.4333	0.03992	0.4363	0.04475	0.2973	0.1897
ENSG00000139668	WDFY2	WD repeat and FYVE domain containing 2 [Source:HGNC Symbol;Acc:HGNC:20482]	0.4332	0.001267	0.4356	0.002437	0.4473	0.009297
ENSG00000188152	NUTM2G	NUT family member 2G [Source:HGNC Symbol;Acc:HGNC:23449]	0.4332	0.05233	0.4364	0.06618	0.4632	0.06665
ENSG00000012171	SEMA3B	semaphorin 3B [Source:HGNC Symbol;Acc:HGNC:10724]	0.433	0.267	0.439	0.2864	0.5142	0.3013
ENSG00000114127	XRN1	5'-3' exoribonuclease 1 [Source:HGNC Symbol;Acc:HGNC:30654]	0.4329	0.0112	0.4343	0.0137	0.3843	0.03853
ENSG00000168806	LCMT2	leucine carboxyl methyltransferase 2 [Source:HGNC Symbol;Acc:HGNC:17558]	0.4327	0.1336	0.4327	0.1786	0.3666	0.3239
ENSG00000198382	UVRAG	UV radiation resistance associated [Source:HGNC Symbol;Acc:HGNC:12640]	0.432	0.001463	0.435	0.002554	0.447	0.004759
ENSG00000144668	ITGA9	integrin subunit alpha 9 [Source:HGNC Symbol;Acc:HGNC:6145]	0.4319	0.201	0.4331	0.2141	0.2525	0.5816
ENSG00000168939	SPRY3	sprouty RTK signaling antagonist 3 [Source:HGNC Symbol;Acc:HGNC:11271]	0.4316	0.008727	0.4346	0.0202	0.3857	0.05613
ENSG00000197601	FAR1	fatty acyl-CoA reductase 1 [Source:HGNC Symbol;Acc:HGNC:26222]	0.4313	0.02762	0.4334	0.03125	0.4654	0.03929
ENSG00000163629	PTPN13	protein tyrosine phosphatase non-receptor type 13 [Source:HGNC Symbol;Acc:HGNC:9646]	0.4309	0.2206	0.4317	0.2489	0.4906	0.2646
ENSG00000130589	HELZ2	helicase with zinc finger 2 [Source:HGNC Symbol;Acc:HGNC:30021]	0.4308	0.2202	0.4305	0.1732	0.2838	0.4337
ENSG00000115339	GALNT3	polypeptide N-acetylgalactosaminyltransferase 3 [Source:HGNC Symbol;Acc:HGNC:4125]	0.43	0.01096	0.4328	0.01831	0.4143	0.04675
ENSG00000166321	NUDT13	nudix hydrolase 13 [Source:HGNC Symbol;Acc:HGNC:18827]	0.4299	0.01095	0.4318	0.02418	0.4321	0.03393
ENSG00000139117	CPNE8	copine 8 [Source:HGNC Symbol;Acc:HGNC:23498]	0.4299	0.0295	0.4329	0.03335	0.4183	0.0461
ENSG00000248672	LY75-CD302	LY75-CD302 readthrough [Source:HGNC Symbol;Acc:HGNC:38828]	0.4294	0.1966	0.4314	0.2531	0.3432	0.3375
ENSG00000105856	HBP1	HMG-box transcription factor 1 [Source:HGNC Symbol;Acc:HGNC:23200]	0.4289	0.03629	0.4322	0.03937	0.4024	0.07197
ENSG00000080546	SESN1	sestrin 1 [Source:HGNC Symbol;Acc:HGNC:21595]	0.4286	0.01172	0.4305	0.01879	0.3602	0.04108
ENSG00000162664	ZNF326	zinc finger protein 326 [Source:HGNC Symbol;Acc:HGNC:14104]	0.4286	0.02066	0.4322	0.02344	0.3466	0.08532
ENSG00000205268	PDE7A	phosphodiesterase 7A [Source:HGNC Symbol;Acc:HGNC:8791]	0.4285	0.03658	0.4313	0.0493	0.3844	0.1214
ENSG00000122420	PTGFR	prostaglandin F receptor [Source:HGNC Symbol;Acc:HGNC:9600]	0.4284	0.6139	0.4149	0.6415	-0.3921	0.6811
ENSG00000042062	RIPOR3	RIPOR family member 3 [Source:HGNC Symbol;Acc:HGNC:16168]	0.4283	0.1237	0.4299	0.1423	0.4688	0.1635
ENSG00000181826	RELL1	RELT like 1 [Source:HGNC Symbol;Acc:HGNC:27379]	0.4281	0.03841	0.4327	0.04265	0.3236	0.1611
ENSG00000214026	MRPL23	mitochondrial ribosomal protein L23 [Source:HGNC Symbol;Acc:HGNC:10322]	0.4269	0.2122	0.4279	0.2131	0.3137	0.4543
ENSG00000100523	DDHD1	DDHD domain containing 1 [Source:HGNC Symbol;Acc:HGNC:19714]	0.4267	0.02573	0.4302	0.02668	0.3564	0.07857
ENSG00000187726	DNAJB13	DnaJ heat shock protein family (Hsp40) member B13 [Source:HGNC Symbol;Acc:HGNC:30718]	0.4266	0.09945	0.4304	0.09894	0.4426	0.1499
ENSG00000163660	CCNL1	cyclin L1 [Source:HGNC Symbol;Acc:HGNC:20569]	0.4261	0.006635	0.4277	0.008716	0.5651	0.004511
ENSG00000135976	ANKRD36	ankyrin repeat domain 36 [Source:HGNC Symbol;Acc:HGNC:24079]	0.4259	0.1232	0.4293	0.1311	0.3297	0.3071
ENSG00000128482	RNF112	ring finger protein 112 [Source:HGNC Symbol;Acc:HGNC:12968]	0.4255	0.08421	0.4343	0.1266	0.362	0.2244
ENSG00000170011	MYRIP	myosin VIIA and Rab interacting protein [Source:HGNC Symbol;Acc:HGNC:19156]	0.4254	0.1546	0.4258	0.1872	0.4101	0.2203
ENSG00000104218	CSPP1	centrosome and spindle pole associated protein 1 [Source:HGNC Symbol;Acc:HGNC:26193]	0.4248	0.003408	0.4277	0.009971	0.4072	0.01618
ENSG00000285238		novel transcript	0.4245	0.1759	0.4296	0.1927	0.3689	0.2672
ENSG00000124256	ZBP1	Z-DNA binding protein 1 [Source:HGNC Symbol;Acc:HGNC:16176]	0.4241	0.1589	0.4253	0.1701	0.3692	0.3198
ENSG00000104093	DMXL2	Dmx like 2 [Source:HGNC Symbol;Acc:HGNC:2938]	0.4232	0.007717	0.4252	0.01095	0.541	0.01076
ENSG00000169398	PTK2	protein tyrosine kinase 2 [Source:HGNC Symbol;Acc:HGNC:9611]	0.4232	0.06676	0.4264	0.0783	0.4903	0.08462
ENSG00000186806	VSIG10L	V-set and immunoglobulin domain containing 10 like [Source:HGNC Symbol;Acc:HGNC:27111]	0.4231	0.05881	0.4229	0.092	0.3992	0.1217
ENSG00000206418	RAB12	RAB12, member RAS oncogene family [Source:HGNC Symbol;Acc:HGNC:31332]	0.423	0.0233	0.4252	0.0257	0.4108	0.04675
ENSG00000166477	LEO1	LEO1 homolog, Paf1/RNA polymerase II complex component [Source:HGNC Symbol;Acc:HGNC:30401]	0.4227	0.007997	0.4154	0.03881	0.4089	0.03758
ENSG00000142528	ZNF473	zinc finger protein 473 [Source:HGNC Symbol;Acc:HGNC:23239]	0.4225	0.04315	0.4248	0.05463	0.3054	0.208
ENSG00000125355	TMEM255A	transmembrane protein 255A [Source:HGNC Symbol;Acc:HGNC:26086]	0.422	0.02426	0.4247	0.03818	0.4174	0.05303
ENSG00000151726	ACSL1	acyl-CoA synthetase long chain family member 1 [Source:HGNC Symbol;Acc:HGNC:3569]	0.422	0.123	0.4224	0.1286	0.4781	0.1118
ENSG00000184517	ZFP1	ZFP1 zinc finger protein [Source:HGNC Symbol;Acc:HGNC:23328]	0.4216	0.03764	0.4217	0.05523	0.4092	0.09054
ENSG00000203666	EFCAB2	EF-hand calcium binding domain 2 [Source:HGNC Symbol;Acc:HGNC:28166]	0.4213	0.006194	0.4237	0.01336	0.4019	0.03758
ENSG00000181381	DDX60L	DExD/H-box 60 like [Source:HGNC Symbol;Acc:HGNC:26429]	0.421	0.089	0.422	0.09894	0.3923	0.1464
ENSG00000196141	SPATS2L	spermatogenesis associated serine rich 2 like [Source:HGNC Symbol;Acc:HGNC:24574]	0.421	0.2103	0.4214	0.2234	0.1412	0.7776
ENSG00000138190	EXOC6	exocyst complex component 6 [Source:HGNC Symbol;Acc:HGNC:23196]	0.4202	0.01319	0.4219	0.0202	0.4012	0.03758
ENSG00000248385	TARM1	T cell-interacting, activating receptor on myeloid cells 1 [Source:HGNC Symbol;Acc:HGNC:37250]	0.4198	0.6663	0.4274	0.69	0.6375	0.6048
ENSG00000143367	TUFT1	tuftelin 1 [Source:HGNC Symbol;Acc:HGNC:12422]	0.4197	0.06713	0.4217	0.1015	0.3454	0.2094
ENSG00000122674	CCZ1	CCZ1 homolog, vacuolar protein trafficking and biogenesis associated [Source:HGNC Symbol;Acc:HGNC:21691]	0.4194	0.04272	0.4227	0.05109	0.3355	0.1476
ENSG00000182580	EPHB3	EPH receptor B3 [Source:HGNC Symbol;Acc:HGNC:3394]	0.4194	0.4479	0.4247	0.4794	0.2229	0.7412
ENSG00000145780	FEM1C	fem-1 homolog C [Source:HGNC Symbol;Acc:HGNC:16933]	0.4183	0.03593	0.4207	0.03937	0.4012	0.06512
ENSG00000155542	SETD9	SET domain containing 9 [Source:HGNC Symbol;Acc:HGNC:28508]	0.4183	0.07777	0.4191	0.09342	0.4118	0.1523
ENSG00000104320	NBN	nibrin [Source:HGNC Symbol;Acc:HGNC:7652]	0.4181	0.005603	0.4214	0.008229	0.3962	0.01896
ENSG00000214029	ZNF891	zinc finger protein 891 [Source:HGNC Symbol;Acc:HGNC:38709]	0.4178	0.09196	0.4127	0.1552	0.4363	0.1245
ENSG00000168811	IL12A	interleukin 12A [Source:HGNC Symbol;Acc:HGNC:5969]	0.4172	0.04249	0.4226	0.05743	0.3686	0.1311
ENSG00000135521	LTV1	LTV1 ribosome biogenesis factor [Source:HGNC Symbol;Acc:HGNC:21173]	0.417	0.00825	0.4207	0.01638	0.3487	0.05309
ENSG00000151553	FAM160B1	family with sequence similarity 160 member B1 [Source:HGNC Symbol;Acc:HGNC:29320]	0.417	0.01304	0.4188	0.018	0.4066	0.03148
ENSG00000162267	ITIH3	inter-alpha-trypsin inhibitor heavy chain 3 [Source:HGNC Symbol;Acc:HGNC:6168]	0.417	0.1336	0.4203	0.1574	0.262	0.4995
ENSG00000132323	ILKAP	ILK associated serine/threonine phosphatase [Source:HGNC Symbol;Acc:HGNC:15566]	0.4157	0.03869	0.4199	0.04121	0.3404	0.1122
ENSG00000164134	NAA15	N(alpha)-acetyltransferase 15, NatA auxiliary subunit [Source:HGNC Symbol;Acc:HGNC:30782]	0.4157	0.0496	0.4184	0.05616	0.3539	0.1295
ENSG00000179240	GVQW3	GVQW motif containing 3 [Source:HGNC Symbol;Acc:HGNC:51239]	0.4157	0.2302	0.4102	0.2936	0.4597	0.2476
ENSG00000188312	CENPP	centromere protein P [Source:HGNC Symbol;Acc:HGNC:32933]	0.4157	0.05995	0.4216	0.08854	0.387	0.116
ENSG00000108590	MED31	mediator complex subunit 31 [Source:HGNC Symbol;Acc:HGNC:24260]	0.4156	0.02661	0.4194	0.03726	0.3804	0.08029
ENSG00000002549	LAP3	leucine aminopeptidase 3 [Source:HGNC Symbol;Acc:HGNC:18449]	0.4153	0.2108	0.4156	0.1671	0.4682	0.155
ENSG00000147257	GPC3	glypican 3 [Source:HGNC Symbol;Acc:HGNC:4451]	0.4153	0.1287	0.4145	0.1565	0.507	0.1402
ENSG00000077514	POLD3	DNA polymerase delta 3, accessory subunit [Source:HGNC Symbol;Acc:HGNC:20932]	0.4146	0.002765	0.4176	0.005746	0.3288	0.03758
ENSG00000133103	COG6	component of oligomeric golgi complex 6 [Source:HGNC Symbol;Acc:HGNC:18621]	0.4137	0.002765	0.4177	0.008955	0.3522	0.03892
ENSG00000069702	TGFBR3	transforming growth factor beta receptor 3 [Source:HGNC Symbol;Acc:HGNC:11774]	0.4129	0.3759	0.4106	0.3889	-0.02154	0.9745
ENSG00000164074	ABHD18	abhydrolase domain containing 18 [Source:HGNC Symbol;Acc:HGNC:26111]	0.4129	0.01783	0.4152	0.02407	0.2921	0.1462
ENSG00000164327	RICTOR	RPTOR independent companion of MTOR complex 2 [Source:HGNC Symbol;Acc:HGNC:28611]	0.4127	0.008867	0.4141	0.01168	0.3865	0.02358
ENSG00000067082	KLF6	Kruppel like factor 6 [Source:HGNC Symbol;Acc:HGNC:2235]	0.4122	0.01155	0.4128	0.01405	0.5534	0.004346
ENSG00000197020	ZNF100	zinc finger protein 100 [Source:HGNC Symbol;Acc:HGNC:12880]	0.412	0.02965	0.4141	0.04015	0.3488	0.1345
ENSG00000114354	TFG	trafficking from ER to golgi regulator [Source:HGNC Symbol;Acc:HGNC:11758]	0.4115	0.003961	0.4138	0.005746	0.3517	0.02025
ENSG00000112249	ASCC3	activating signal cointegrator 1 complex subunit 3 [Source:HGNC Symbol;Acc:HGNC:18697]	0.4113	0.00255	0.4133	0.004099	0.3775	0.01231
ENSG00000135605	TEC	tec protein tyrosine kinase [Source:HGNC Symbol;Acc:HGNC:11719]	0.4112	0.001774	0.4118	0.006524	0.4071	0.01174
ENSG00000186088	GSAP	gamma-secretase activating protein [Source:HGNC Symbol;Acc:HGNC:28042]	0.4112	0.002725	0.4134	0.00439	0.3686	0.01251
ENSG00000144426	NBEAL1	neurobeachin like 1 [Source:HGNC Symbol;Acc:HGNC:20681]	0.4111	0.07412	0.4085	0.07254	0.1641	0.4149
ENSG00000162972	MAIP1	matrix AAA peptidase interacting protein 1 [Source:HGNC Symbol;Acc:HGNC:26198]	0.4108	0.009138	0.4133	0.01597	0.3718	0.04208
ENSG00000184903	IMMP2L	inner mitochondrial membrane peptidase subunit 2 [Source:HGNC Symbol;Acc:HGNC:14598]	0.4101	0.0295	0.4129	0.04166	0.3563	0.09604
ENSG00000254469		Putative short transient receptor potential channel 2-like protein [Source:UniProtKB/Swiss-Prot;Acc:Q6ZNB5]	0.41	0.02933	0.4154	0.0506	0.3195	0.16
ENSG00000136231	IGF2BP3	insulin like growth factor 2 mRNA binding protein 3 [Source:HGNC Symbol;Acc:HGNC:28868]	0.41	0.2143	0.4091	0.2498	0.4765	0.2262
ENSG00000123836	PFKFB2	6-phosphofructo-2-kinase/fructose-2,6-biphosphatase 2 [Source:HGNC Symbol;Acc:HGNC:8873]	0.4099	0.02771	0.4123	0.03258	0.3097	0.1352
ENSG00000174485	DENND4A	DENN domain containing 4A [Source:HGNC Symbol;Acc:HGNC:24321]	0.4094	0.08314	0.4142	0.08857	0.3869	0.1266
ENSG00000165115	KIF27	kinesin family member 27 [Source:HGNC Symbol;Acc:HGNC:18632]	0.4093	0.009675	0.4118	0.0202	0.3694	0.05662
ENSG00000128284	APOL3	apolipoprotein L3 [Source:HGNC Symbol;Acc:HGNC:14868]	0.4092	0.05119	0.4124	0.05308	0.3637	0.1133
ENSG00000213928	IRF9	interferon regulatory factor 9 [Source:HGNC Symbol;Acc:HGNC:6131]	0.409	0.166	0.4136	0.1867	0.2512	0.4946
ENSG00000145526	CDH18	cadherin 18 [Source:HGNC Symbol;Acc:HGNC:1757]	0.4087	0.5658	0.4007	0.6387	0.4042	0.6069
ENSG00000163029	SMC6	structural maintenance of chromosomes 6 [Source:HGNC Symbol;Acc:HGNC:20466]	0.4086	0.0002376	0.4117	0.002176	0.3789	0.006611
ENSG00000123607	TTC21B	tetratricopeptide repeat domain 21B [Source:HGNC Symbol;Acc:HGNC:25660]	0.4083	0.004198	0.4111	0.00793	0.3268	0.04984
ENSG00000114446	IFT57	intraflagellar transport 57 [Source:HGNC Symbol;Acc:HGNC:17367]	0.4078	0.02418	0.4096	0.03227	0.3633	0.09493
ENSG00000088035	ALG6	ALG6 alpha-1,3-glucosyltransferase [Source:HGNC Symbol;Acc:HGNC:23157]	0.4076	0.02918	0.4098	0.0401	0.321	0.1218
ENSG00000102445	RUBCNL	rubicon like autophagy enhancer [Source:HGNC Symbol;Acc:HGNC:20420]	0.4075	0.07936	0.4095	0.0906	0.5367	0.06578
ENSG00000179833	SERTAD2	SERTA domain containing 2 [Source:HGNC Symbol;Acc:HGNC:30784]	0.407	0.02551	0.4097	0.03231	0.4192	0.04591
ENSG00000196873	CBWD3	COBW domain containing 3 [Source:HGNC Symbol;Acc:HGNC:18519]	0.4069	0.0922	0.4103	0.1015	0.2681	0.3384
ENSG00000138750	NUP54	nucleoporin 54 [Source:HGNC Symbol;Acc:HGNC:17359]	0.4067	0.0142	0.4097	0.01969	0.3669	0.0453
ENSG00000141449	GREB1L	GREB1 like retinoic acid receptor coactivator [Source:HGNC Symbol;Acc:HGNC:31042]	0.4066	0.1579	0.4143	0.1988	0.2387	0.5466
ENSG00000155966	AFF2	AF4/FMR2 family member 2 [Source:HGNC Symbol;Acc:HGNC:3776]	0.4066	0.1466	0.4071	0.1706	0.264	0.4515
ENSG00000162851	TFB2M	transcription factor B2, mitochondrial [Source:HGNC Symbol;Acc:HGNC:18559]	0.4053	0.01185	0.4076	0.02209	0.4073	0.02999
ENSG00000169519	METTL15	methyltransferase like 15 [Source:HGNC Symbol;Acc:HGNC:26606]	0.4053	0.04137	0.4084	0.05523	0.3349	0.1383
ENSG00000109184	DCUN1D4	defective in cullin neddylation 1 domain containing 4 [Source:HGNC Symbol;Acc:HGNC:28998]	0.4051	0.01794	0.4072	0.02832	0.3682	0.0572
ENSG00000164463	CREBRF	CREB3 regulatory factor [Source:HGNC Symbol;Acc:HGNC:24050]	0.4043	0.01074	0.4048	0.01491	0.3844	0.04189
ENSG00000172757	CFL1	cofilin 1 [Source:HGNC Symbol;Acc:HGNC:1874]	0.4043	0.1444	0.4133	0.1768	0.2469	0.4978
ENSG00000254995	STX16-NPEPL1	STX16-NPEPL1 readthrough (NMD candidate) [Source:HGNC Symbol;Acc:HGNC:41993]	0.4039	0.0531	0.4069	0.0629	0.3398	0.1499
ENSG00000135655	USP15	ubiquitin specific peptidase 15 [Source:HGNC Symbol;Acc:HGNC:12613]	0.4031	0.01649	0.4046	0.02173	0.4746	0.02391
ENSG00000185621	LMLN	leishmanolysin like peptidase [Source:HGNC Symbol;Acc:HGNC:15991]	0.4023	0.07596	0.405	0.0998	0.3147	0.2435
ENSG00000174442	ZWILCH	zwilch kinetochore protein [Source:HGNC Symbol;Acc:HGNC:25468]	0.4022	0.03826	0.4115	0.08179	0.3718	0.122
ENSG00000151914	DST	dystonin [Source:HGNC Symbol;Acc:HGNC:1090]	0.4022	0.1213	0.4091	0.124	0.2455	0.418
ENSG00000196470	SIAH1	siah E3 ubiquitin protein ligase 1 [Source:HGNC Symbol;Acc:HGNC:10857]	0.4021	0.1362	0.4069	0.1387	0.3124	0.2886
ENSG00000198838	RYR3	ryanodine receptor 3 [Source:HGNC Symbol;Acc:HGNC:10485]	0.4021	0.06448	0.4054	0.08045	0.3697	0.1371
ENSG00000151353	TMEM18	transmembrane protein 18 [Source:HGNC Symbol;Acc:HGNC:25257]	0.402	0.0351	0.4058	0.04042	0.3431	0.1134
ENSG00000128833	MYO5C	myosin VC [Source:HGNC Symbol;Acc:HGNC:7604]	0.4017	0.1712	0.4011	0.2327	0.3953	0.2432
ENSG00000072415	MPP5	membrane palmitoylated protein 5 [Source:HGNC Symbol;Acc:HGNC:18669]	0.4014	0.04369	0.4053	0.05897	0.2591	0.2657
ENSG00000106392	C1GALT1	core 1 synthase, glycoprotein-N-acetylgalactosamine 3-beta-galactosyltransferase 1 [Source:HGNC Symbol;Acc:HGNC:24337]	0.4012	0.001986	0.4022	0.004997	0.3843	0.01251
ENSG00000124383	MPHOSPH10	M-phase phosphoprotein 10 [Source:HGNC Symbol;Acc:HGNC:7213]	0.4011	0.002483	0.4024	0.007447	0.3841	0.01251
ENSG00000205189	ZBTB10	zinc finger and BTB domain containing 10 [Source:HGNC Symbol;Acc:HGNC:30953]	0.4004	0.01713	0.4021	0.02746	0.3895	0.0578
ENSG00000172731	LRRC20	leucine rich repeat containing 20 [Source:HGNC Symbol;Acc:HGNC:23421]	0.4003	0.304	0.4029	0.3345	0.5171	0.2963
ENSG00000167034	NKX3-1	NK3 homeobox 1 [Source:HGNC Symbol;Acc:HGNC:7838]	0.3987	0.5264	0.4027	0.5319	-0.1218	0.8928
ENSG00000160932	LY6E	lymphocyte antigen 6 family member E [Source:HGNC Symbol;Acc:HGNC:6727]	0.3981	0.4146	0.3974	0.3429	0.2192	0.6617
ENSG00000166323	C11orf65	chromosome 11 open reading frame 65 [Source:HGNC Symbol;Acc:HGNC:28519]	0.3978	0.119	0.4008	0.1607	0.3739	0.1976
ENSG00000156026	MCU	mitochondrial calcium uniporter [Source:HGNC Symbol;Acc:HGNC:23526]	0.3977	0.000368	0.3997	0.002437	0.3565	0.00988
ENSG00000234545	FAM133B	family with sequence similarity 133 member B [Source:HGNC Symbol;Acc:HGNC:28629]	0.3969	0.05407	0.3997	0.06085	0.2895	0.1793
ENSG00000116032	GRIN3B	glutamate ionotropic receptor NMDA type subunit 3B [Source:HGNC Symbol;Acc:HGNC:16768]	0.3967	0.1579	0.3967	0.2045	0.2629	0.4719
ENSG00000087301	TXNDC16	thioredoxin domain containing 16 [Source:HGNC Symbol;Acc:HGNC:19965]	0.3964	0.0237	0.3988	0.03326	0.3587	0.06009
ENSG00000189068	VSTM1	V-set and transmembrane domain containing 1 [Source:HGNC Symbol;Acc:HGNC:29455]	0.3964	0.3153	0.3971	0.3296	0.3764	0.4383
ENSG00000166575	TMEM135	transmembrane protein 135 [Source:HGNC Symbol;Acc:HGNC:26167]	0.3959	0.02551	0.398	0.03888	0.4125	0.05113
ENSG00000180263	FGD6	FYVE, RhoGEF and PH domain containing 6 [Source:HGNC Symbol;Acc:HGNC:21740]	0.3956	0.005627	0.3968	0.008284	0.4099	0.01064
ENSG00000138764	CCNG2	cyclin G2 [Source:HGNC Symbol;Acc:HGNC:1593]	0.3946	0.09171	0.3945	0.1064	0.4249	0.1283
ENSG00000197442	MAP3K5	mitogen-activated protein kinase kinase kinase 5 [Source:HGNC Symbol;Acc:HGNC:6857]	0.3943	0.001558	0.3969	0.003606	0.4062	0.006628
ENSG00000205413	SAMD9	sterile alpha motif domain containing 9 [Source:HGNC Symbol;Acc:HGNC:1348]	0.3943	0.1237	0.3958	0.1342	0.2594	0.4135
ENSG00000283782		novel protein	0.3941	0.2334	0.3986	0.1677	0.5205	0.09548
ENSG00000198315	ZKSCAN8	zinc finger with KRAB and SCAN domains 8 [Source:HGNC Symbol;Acc:HGNC:12983]	0.3938	0.04397	0.3969	0.05096	0.3133	0.1487
ENSG00000101347	SAMHD1	SAM and HD domain containing deoxynucleoside triphosphate triphosphohydrolase 1 [Source:HGNC Symbol;Acc:HGNC:15925]	0.3936	0.0007336	0.3957	0.002541	0.4422	0.003774
ENSG00000143457	GOLPH3L	golgi phosphoprotein 3 like [Source:HGNC Symbol;Acc:HGNC:24882]	0.3936	0.06182	0.3954	0.07984	0.4727	0.05725
ENSG00000177842	ZNF620	zinc finger protein 620 [Source:HGNC Symbol;Acc:HGNC:28742]	0.3935	0.02707	0.3982	0.03956	0.3272	0.102
ENSG00000168679	SLC16A4	solute carrier family 16 member 4 [Source:HGNC Symbol;Acc:HGNC:10925]	0.393	0.0855	0.3941	0.106	0.3913	0.1819
ENSG00000127993	RBM48	RNA binding motif protein 48 [Source:HGNC Symbol;Acc:HGNC:21785]	0.3929	0.006193	0.396	0.01586	0.3701	0.03115
ENSG00000255833	TIFAB	TIFA inhibitor [Source:HGNC Symbol;Acc:HGNC:34024]	0.3929	0.3638	0.3952	0.3842	0.4375	0.4703
ENSG00000026103	FAS	Fas cell surface death receptor [Source:HGNC Symbol;Acc:HGNC:11920]	0.3926	0.06798	0.3926	0.08339	0.4012	0.1097
ENSG00000083520	DIS3	DIS3 homolog, exosome endoribonuclease and 3'-5' exoribonuclease [Source:HGNC Symbol;Acc:HGNC:20604]	0.3924	0.03801	0.3943	0.04581	0.3621	0.07792
ENSG00000105649	RAB3A	RAB3A, member RAS oncogene family [Source:HGNC Symbol;Acc:HGNC:9777]	0.3921	0.1944	0.3882	0.248	0.4977	0.2359
ENSG00000174837	ADGRE1	adhesion G protein-coupled receptor E1 [Source:HGNC Symbol;Acc:HGNC:3336]	0.3919	0.09987	0.3935	0.1247	0.4781	0.07015
ENSG00000114374	USP9Y	ubiquitin specific peptidase 9 Y-linked [Source:HGNC Symbol;Acc:HGNC:12633]	0.3918	0.6634	0.3959	0.6415	0.9725	0.559
ENSG00000137393	RNF144B	ring finger protein 144B [Source:HGNC Symbol;Acc:HGNC:21578]	0.3918	0.2675	0.3918	0.2567	0.3478	0.3655
ENSG00000134531	EMP1	epithelial membrane protein 1 [Source:HGNC Symbol;Acc:HGNC:3333]	0.3914	0.587	0.4046	0.5349	0.1122	0.9082
ENSG00000096654	ZNF184	zinc finger protein 184 [Source:HGNC Symbol;Acc:HGNC:12975]	0.3913	0.1523	0.3991	0.187	0.2427	0.416
ENSG00000135362	PRR5L	proline rich 5 like [Source:HGNC Symbol;Acc:HGNC:25878]	0.3911	0.1995	0.3903	0.198	0.1198	0.768
ENSG00000198039	ZNF273	zinc finger protein 273 [Source:HGNC Symbol;Acc:HGNC:13067]	0.3911	0.1387	0.3928	0.1894	0.4299	0.1667
ENSG00000163874	ZC3H12A	zinc finger CCCH-type containing 12A [Source:HGNC Symbol;Acc:HGNC:26259]	0.3909	0.1349	0.3959	0.1416	0.4259	0.1223
ENSG00000234511	C5orf58	chromosome 5 open reading frame 58 [Source:HGNC Symbol;Acc:HGNC:37272]	0.3905	0.09777	0.394	0.1143	0.4469	0.1372
ENSG00000148835	TAF5	TATA-box binding protein associated factor 5 [Source:HGNC Symbol;Acc:HGNC:11539]	0.3897	0.01842	0.3915	0.0338	0.3473	0.08111
ENSG00000140280	LYSMD2	LysM domain containing 2 [Source:HGNC Symbol;Acc:HGNC:28571]	0.3896	0.07652	0.3953	0.07792	0.3653	0.1133
ENSG00000005175	RPAP3	RNA polymerase II associated protein 3 [Source:HGNC Symbol;Acc:HGNC:26151]	0.3889	0.00118	0.393	0.00503	0.336	0.02303
ENSG00000171940	ZNF217	zinc finger protein 217 [Source:HGNC Symbol;Acc:HGNC:13009]	0.3887	0.1047	0.3904	0.1089	0.3188	0.2571
ENSG00000111711	GOLT1B	golgi transport 1B [Source:HGNC Symbol;Acc:HGNC:20175]	0.3883	0.05505	0.3911	0.05967	0.3484	0.1064
ENSG00000135540	NHSL1	NHS like 1 [Source:HGNC Symbol;Acc:HGNC:21021]	0.3881	0.09002	0.3899	0.1015	0.2946	0.3081
ENSG00000221914	PPP2R2A	protein phosphatase 2 regulatory subunit Balpha [Source:HGNC Symbol;Acc:HGNC:9304]	0.3879	0.08781	0.3908	0.09155	0.377	0.1158
ENSG00000086666	ZFAND6	zinc finger AN1-type containing 6 [Source:HGNC Symbol;Acc:HGNC:30164]	0.3878	0.09241	0.3912	0.09383	0.3611	0.1551
ENSG00000196418	ZNF124	zinc finger protein 124 [Source:HGNC Symbol;Acc:HGNC:12907]	0.3878	0.1183	0.392	0.1254	0.3413	0.2591
ENSG00000134758	RNF138	ring finger protein 138 [Source:HGNC Symbol;Acc:HGNC:17765]	0.3869	0.003912	0.3888	0.008055	0.3724	0.02358
ENSG00000134245	WNT2B	Wnt family member 2B [Source:HGNC Symbol;Acc:HGNC:12781]	0.3866	0.271	0.3898	0.2931	0.3034	0.5484
ENSG00000112893	MAN2A1	mannosidase alpha class 2A member 1 [Source:HGNC Symbol;Acc:HGNC:6824]	0.3862	0.008835	0.3871	0.01256	0.3738	0.01896
ENSG00000111962	UST	uronyl 2-sulfotransferase [Source:HGNC Symbol;Acc:HGNC:17223]	0.3862	0.1569	0.3911	0.1845	0.3632	0.2405
ENSG00000137714	FDX1	ferredoxin 1 [Source:HGNC Symbol;Acc:HGNC:3638]	0.386	0.03273	0.3894	0.03881	0.3771	0.06257
ENSG00000105866	SP4	Sp4 transcription factor [Source:HGNC Symbol;Acc:HGNC:11209]	0.3856	0.09539	0.3888	0.109	0.3205	0.2331
ENSG00000167378	IRGQ	immunity related GTPase Q [Source:HGNC Symbol;Acc:HGNC:24868]	0.3855	0.1167	0.3899	0.1341	0.3812	0.1747
ENSG00000141682	PMAIP1	phorbol-12-myristate-13-acetate-induced protein 1 [Source:HGNC Symbol;Acc:HGNC:9108]	0.385	0.0918	0.3849	0.09894	0.3174	0.2248
ENSG00000163069	SGCB	sarcoglycan beta [Source:HGNC Symbol;Acc:HGNC:10806]	0.3849	0.3161	0.3802	0.3822	0.3964	0.3623
ENSG00000286185		novel protein, identical to neuroblastoma breakpoint family, member 19 NBPF19	0.3843	0.2075	0.3855	0.2134	0.4101	0.2367
ENSG00000102755	FLT1	fms related tyrosine kinase 1 [Source:HGNC Symbol;Acc:HGNC:3763]	0.3842	0.4878	0.382	0.5117	0.1532	0.8448
ENSG00000162946	DISC1	DISC1 scaffold protein [Source:HGNC Symbol;Acc:HGNC:2888]	0.3842	0.03302	0.3878	0.03818	0.3789	0.05073
ENSG00000152229	PSTPIP2	proline-serine-threonine phosphatase interacting protein 2 [Source:HGNC Symbol;Acc:HGNC:9581]	0.3838	0.1047	0.386	0.1036	0.3678	0.1402
ENSG00000114423	CBLB	Cbl proto-oncogene B [Source:HGNC Symbol;Acc:HGNC:1542]	0.3834	0.0107	0.3866	0.01905	0.3304	0.04984
ENSG00000182601	HS3ST4	heparan sulfate-glucosamine 3-sulfotransferase 4 [Source:HGNC Symbol;Acc:HGNC:5200]	0.3832	0.2737	0.3794	0.2765	-0.04781	0.8997
ENSG00000205307	SAP25	Sin3A associated protein 25 [Source:HGNC Symbol;Acc:HGNC:41908]	0.383	0.02667	0.3862	0.03363	0.3579	0.09109
ENSG00000050438	SLC4A8	solute carrier family 4 member 8 [Source:HGNC Symbol;Acc:HGNC:11034]	0.3829	0.006019	0.3866	0.01411	0.3108	0.05388
ENSG00000198673	TAFA2	TAFA chemokine like family member 2 [Source:HGNC Symbol;Acc:HGNC:21589]	0.3828	0.1669	0.3844	0.2172	0.455	0.08436
ENSG00000133703	KRAS	KRAS proto-oncogene, GTPase [Source:HGNC Symbol;Acc:HGNC:6407]	0.3825	0.04272	0.3851	0.04755	0.2913	0.1674
ENSG00000117528	ABCD3	ATP binding cassette subfamily D member 3 [Source:HGNC Symbol;Acc:HGNC:67]	0.3822	0.01633	0.3852	0.02352	0.279	0.1127
ENSG00000100916	BRMS1L	BRMS1 like transcriptional repressor [Source:HGNC Symbol;Acc:HGNC:20512]	0.382	0.01179	0.3824	0.03258	0.35	0.05209
ENSG00000159459	UBR1	ubiquitin protein ligase E3 component n-recognin 1 [Source:HGNC Symbol;Acc:HGNC:16808]	0.3815	0.03419	0.3839	0.04041	0.3112	0.1133
ENSG00000134198	TSPAN2	tetraspanin 2 [Source:HGNC Symbol;Acc:HGNC:20659]	0.3812	0.05881	0.3806	0.09186	0.4057	0.09441
ENSG00000168016	TRANK1	tetratricopeptide repeat and ankyrin repeat containing 1 [Source:HGNC Symbol;Acc:HGNC:29011]	0.3809	0.05185	0.3825	0.06005	0.3289	0.1402
ENSG00000142621	FHAD1	forkhead associated phosphopeptide binding domain 1 [Source:HGNC Symbol;Acc:HGNC:29408]	0.3807	0.3915	0.3894	0.3924	0.002246	0.9978
ENSG00000154856	APCDD1	APC down-regulated 1 [Source:HGNC Symbol;Acc:HGNC:15718]	0.3804	0.1871	0.3812	0.2014	0.3574	0.3519
ENSG00000125846	ZNF133	zinc finger protein 133 [Source:HGNC Symbol;Acc:HGNC:12917]	0.3798	0.02551	0.3849	0.0383	0.277	0.1401
ENSG00000003987	MTMR7	myotubularin related protein 7 [Source:HGNC Symbol;Acc:HGNC:7454]	0.3798	0.04732	0.3845	0.06561	0.3114	0.1598
ENSG00000156735	BAG4	BCL2 associated athanogene 4 [Source:HGNC Symbol;Acc:HGNC:940]	0.3794	0.01808	0.3814	0.03066	0.3926	0.03415
ENSG00000188610	FAM72B	family with sequence similarity 72 member B [Source:HGNC Symbol;Acc:HGNC:24805]	0.3794	0.1774	0.3861	0.2007	0.2621	0.4684
ENSG00000062598	ELMO2	engulfment and cell motility 2 [Source:HGNC Symbol;Acc:HGNC:17233]	0.3793	0.004527	0.3798	0.006983	0.3679	0.0145
ENSG00000175471	MCTP1	multiple C2 and transmembrane domain containing 1 [Source:HGNC Symbol;Acc:HGNC:26183]	0.3792	0.01449	0.3822	0.01944	0.3617	0.03435
ENSG00000125834	STK35	serine/threonine kinase 35 [Source:HGNC Symbol;Acc:HGNC:16254]	0.3787	0.03273	0.3831	0.03964	0.3489	0.0681
ENSG00000132669	RIN2	Ras and Rab interactor 2 [Source:HGNC Symbol;Acc:HGNC:18750]	0.3785	0.001975	0.3806	0.004606	0.3891	0.007788
ENSG00000277726		novel protein	0.3779	0.2268	0.38	0.2415	0.3084	0.4714
ENSG00000118564	FBXL5	F-box and leucine rich repeat protein 5 [Source:HGNC Symbol;Acc:HGNC:13602]	0.3776	0.01259	0.3772	0.0187	0.4229	0.02138
ENSG00000004766	VPS50	VPS50 subunit of EARP/GARPII complex [Source:HGNC Symbol;Acc:HGNC:25956]	0.3775	0.004364	0.3804	0.01189	0.3158	0.02978
ENSG00000164823	OSGIN2	oxidative stress induced growth inhibitor family member 2 [Source:HGNC Symbol;Acc:HGNC:1355]	0.3775	0.05634	0.3786	0.0703	0.4109	0.08083
ENSG00000105204	DYRK1B	dual specificity tyrosine phosphorylation regulated kinase 1B [Source:HGNC Symbol;Acc:HGNC:3092]	0.3774	0.08	0.3803	0.09517	0.3756	0.1429
ENSG00000092978	GPATCH2	G-patch domain containing 2 [Source:HGNC Symbol;Acc:HGNC:25499]	0.3774	0.03	0.3808	0.04059	0.2753	0.1635
ENSG00000188001	TPRG1	tumor protein p63 regulated 1 [Source:HGNC Symbol;Acc:HGNC:24759]	0.3769	0.08108	0.3803	0.09769	0.2086	0.3821
ENSG00000047346	FAM214A	family with sequence similarity 214 member A [Source:HGNC Symbol;Acc:HGNC:25609]	0.3767	0.02308	0.3788	0.03107	0.267	0.1635
ENSG00000188529	SRSF10	serine and arginine rich splicing factor 10 [Source:HGNC Symbol;Acc:HGNC:16713]	0.3765	0.007969	0.3788	0.01256	0.3945	0.01325
ENSG00000187210	GCNT1	glucosaminyl (N-acetyl) transferase 1 [Source:HGNC Symbol;Acc:HGNC:4203]	0.3765	0.03139	0.3761	0.04755	0.3403	0.1031
ENSG00000185238	PRMT3	protein arginine methyltransferase 3 [Source:HGNC Symbol;Acc:HGNC:30163]	0.3765	0.03455	0.3802	0.04506	0.3029	0.1138
ENSG00000116473	RAP1A	RAP1A, member of RAS oncogene family [Source:HGNC Symbol;Acc:HGNC:9855]	0.3758	0.05407	0.3798	0.0703	0.3308	0.1347
ENSG00000285082		novel protein	0.3748	0.2614	0.3778	0.2867	0.4921	0.1903
ENSG00000052126	PLEKHA5	pleckstrin homology domain containing A5 [Source:HGNC Symbol;Acc:HGNC:30036]	0.3747	0.2735	0.375	0.32	0.4862	0.2109
ENSG00000154642	C21orf91	chromosome 21 open reading frame 91 [Source:HGNC Symbol;Acc:HGNC:16459]	0.3745	0.01327	0.3745	0.03209	0.3681	0.03944
ENSG00000179348	GATA2	GATA binding protein 2 [Source:HGNC Symbol;Acc:HGNC:4171]	0.3743	0.6348	0.3768	0.6783	-0.02929	0.9768
ENSG00000168917	SLC35G2	solute carrier family 35 member G2 [Source:HGNC Symbol;Acc:HGNC:28480]	0.3741	0.07777	0.3775	0.09576	0.3845	0.102
ENSG00000188981	MSANTD1	Myb/SANT DNA binding domain containing 1 [Source:HGNC Symbol;Acc:HGNC:33741]	0.3741	0.2557	0.3752	0.3141	0.3879	0.2977
ENSG00000166167	BTRC	beta-transducin repeat containing E3 ubiquitin protein ligase [Source:HGNC Symbol;Acc:HGNC:1144]	0.3737	0.003123	0.3771	0.0118	0.3259	0.03758
ENSG00000109618	SEPSECS	Sep (O-phosphoserine) tRNA:Sec (selenocysteine) tRNA synthase [Source:HGNC Symbol;Acc:HGNC:30605]	0.3733	0.06185	0.3759	0.07331	0.2846	0.2021
ENSG00000182405	PGBD4	piggyBac transposable element derived 4 [Source:HGNC Symbol;Acc:HGNC:19401]	0.3731	0.03935	0.372	0.1062	0.3466	0.1419
ENSG00000134864	GGACT	gamma-glutamylamine cyclotransferase [Source:HGNC Symbol;Acc:HGNC:25100]	0.3731	0.1372	0.3734	0.1646	0.427	0.09251
ENSG00000172197	MBOAT1	membrane bound O-acyltransferase domain containing 1 [Source:HGNC Symbol;Acc:HGNC:21579]	0.373	0.002483	0.3761	0.004756	0.3568	0.01174
ENSG00000179454	KLHL28	kelch like family member 28 [Source:HGNC Symbol;Acc:HGNC:19741]	0.373	0.007387	0.3751	0.01913	0.378	0.01896
ENSG00000152348	ATG10	autophagy related 10 [Source:HGNC Symbol;Acc:HGNC:20315]	0.373	0.01633	0.374	0.03272	0.3393	0.06082
ENSG00000173821	RNF213	ring finger protein 213 [Source:HGNC Symbol;Acc:HGNC:14539]	0.373	0.05407	0.3744	0.05593	0.4603	0.03275
ENSG00000105849	TWISTNB	TWIST neighbor [Source:HGNC Symbol;Acc:HGNC:18027]	0.3715	0.06202	0.3743	0.07981	0.4304	0.06317
ENSG00000156500	FAM122C	family with sequence similarity 122C [Source:HGNC Symbol;Acc:HGNC:25202]	0.3712	0.006446	0.3745	0.01858	0.2829	0.09446
ENSG00000102081	FMR1	FMRP translational regulator 1 [Source:HGNC Symbol;Acc:HGNC:3775]	0.3712	0.02737	0.3744	0.03171	0.3129	0.07354
ENSG00000129493	HEATR5A	HEAT repeat containing 5A [Source:HGNC Symbol;Acc:HGNC:20276]	0.3709	0.03274	0.3735	0.04733	0.3631	0.0516
ENSG00000101247	NDUFAF5	NADH:ubiquinone oxidoreductase complex assembly factor 5 [Source:HGNC Symbol;Acc:HGNC:15899]	0.3706	0.006635	0.3732	0.01555	0.3559	0.02231
ENSG00000023171	GRAMD1B	GRAM domain containing 1B [Source:HGNC Symbol;Acc:HGNC:29214]	0.3705	0.03585	0.3735	0.04243	0.3318	0.08735
ENSG00000153064	BANK1	B cell scaffold protein with ankyrin repeats 1 [Source:HGNC Symbol;Acc:HGNC:18233]	0.3705	0.0835	0.372	0.09894	0.2645	0.297
ENSG00000107611	CUBN	cubilin [Source:HGNC Symbol;Acc:HGNC:2548]	0.3704	0.1303	0.3721	0.1647	0.3677	0.1743
ENSG00000074266	EED	embryonic ectoderm development [Source:HGNC Symbol;Acc:HGNC:3188]	0.3703	0.004527	0.3726	0.0167	0.3442	0.0178
ENSG00000144785		novel protein	0.37	0.1448	0.3709	0.209	0.3364	0.2787
ENSG00000075651	PLD1	phospholipase D1 [Source:HGNC Symbol;Acc:HGNC:9067]	0.3699	0.03629	0.3713	0.0532	0.4097	0.04543
ENSG00000203747	FCGR3A	Fc fragment of IgG receptor IIIa [Source:HGNC Symbol;Acc:HGNC:3619]	0.3695	0.2996	0.3689	0.2631	0.1113	0.7987
ENSG00000122008	POLK	DNA polymerase kappa [Source:HGNC Symbol;Acc:HGNC:9183]	0.3693	0.0009269	0.3715	0.003202	0.3111	0.01315
ENSG00000112312	GMNN	geminin DNA replication inhibitor [Source:HGNC Symbol;Acc:HGNC:17493]	0.369	0.04123	0.3682	0.08533	0.4163	0.08023
ENSG00000112685	EXOC2	exocyst complex component 2 [Source:HGNC Symbol;Acc:HGNC:24968]	0.3689	2.022e-05	0.3729	0.000528	0.3367	0.002457
ENSG00000134265	NAPG	NSF attachment protein gamma [Source:HGNC Symbol;Acc:HGNC:7642]	0.3687	0.07777	0.3721	0.08136	0.3587	0.09797
ENSG00000116497	S100PBP	S100P binding protein [Source:HGNC Symbol;Acc:HGNC:25768]	0.3684	0.005627	0.371	0.01382	0.321	0.03868
ENSG00000100519	PSMC6	proteasome 26S subunit, ATPase 6 [Source:HGNC Symbol;Acc:HGNC:9553]	0.3682	0.007525	0.3704	0.01176	0.323	0.02422
ENSG00000002016	RAD52	RAD52 homolog, DNA repair protein [Source:HGNC Symbol;Acc:HGNC:9824]	0.3677	0.02781	0.3678	0.05185	0.38	0.04143
ENSG00000162994	CLHC1	clathrin heavy chain linker domain containing 1 [Source:HGNC Symbol;Acc:HGNC:26453]	0.3674	0.3744	0.3732	0.4041	0.4947	0.2669
ENSG00000064763	FAR2	fatty acyl-CoA reductase 2 [Source:HGNC Symbol;Acc:HGNC:25531]	0.3672	0.04863	0.3718	0.05808	0.3362	0.09638
ENSG00000157181	ODR4	odr-4 GPCR localization factor homolog [Source:HGNC Symbol;Acc:HGNC:24299]	0.3672	0.1109	0.371	0.1131	0.2749	0.2777
ENSG00000170854	RIOX2	ribosomal oxygenase 2 [Source:HGNC Symbol;Acc:HGNC:19441]	0.3671	0.03033	0.3677	0.04875	0.3444	0.09915
ENSG00000183137	CEP57L1	centrosomal protein 57 like 1 [Source:HGNC Symbol;Acc:HGNC:21561]	0.367	0.04489	0.3675	0.0838	0.3392	0.113
ENSG00000197566	ZNF624	zinc finger protein 624 [Source:HGNC Symbol;Acc:HGNC:29254]	0.3669	0.1403	0.3692	0.1787	0.3955	0.1895
ENSG00000188092	GPR89B	G protein-coupled receptor 89B [Source:HGNC Symbol;Acc:HGNC:13840]	0.3667	0.02852	0.3747	0.04874	0.2739	0.1572
ENSG00000162645	GBP2	guanylate binding protein 2 [Source:HGNC Symbol;Acc:HGNC:4183]	0.3667	0.2712	0.369	0.1969	0.4838	0.1096
ENSG00000197620	CXorf40A	chromosome X open reading frame 40A [Source:HGNC Symbol;Acc:HGNC:28089]	0.3665	0.04565	0.3701	0.05694	0.31	0.1429
ENSG00000121486	TRMT1L	tRNA methyltransferase 1 like [Source:HGNC Symbol;Acc:HGNC:16782]	0.3664	0.03741	0.369	0.05923	0.351	0.0875
ENSG00000178342	KCNG2	potassium voltage-gated channel modifier subfamily G member 2 [Source:HGNC Symbol;Acc:HGNC:6249]	0.3664	0.2343	0.3701	0.2524	0.07403	0.878
ENSG00000105793	GTPBP10	GTP binding protein 10 [Source:HGNC Symbol;Acc:HGNC:25106]	0.3661	0.05376	0.3678	0.07615	0.3168	0.1359
ENSG00000143353	LYPLAL1	lysophospholipase like 1 [Source:HGNC Symbol;Acc:HGNC:20440]	0.3661	0.04431	0.3685	0.0544	0.2698	0.1932
ENSG00000178199	ZC3H12D	zinc finger CCCH-type containing 12D [Source:HGNC Symbol;Acc:HGNC:21175]	0.3661	0.07839	0.3682	0.08724	0.3301	0.1871
ENSG00000177853	ZNF518A	zinc finger protein 518A [Source:HGNC Symbol;Acc:HGNC:29009]	0.366	0.04302	0.3681	0.05167	0.3189	0.0932
ENSG00000154309	DISP1	dispatched RND transporter family member 1 [Source:HGNC Symbol;Acc:HGNC:19711]	0.3654	0.2569	0.3664	0.2919	0.541	0.1612
ENSG00000204815	TTC25	tetratricopeptide repeat domain 25 [Source:HGNC Symbol;Acc:HGNC:25280]	0.3654	0.1244	0.3693	0.1495	0.2915	0.2817
ENSG00000187187	ZNF546	zinc finger protein 546 [Source:HGNC Symbol;Acc:HGNC:28671]	0.3652	0.1336	0.3656	0.1704	0.3938	0.1439
ENSG00000183773	AIFM3	apoptosis inducing factor mitochondria associated 3 [Source:HGNC Symbol;Acc:HGNC:26398]	0.365	0.02252	0.3656	0.02826	0.2652	0.1428
ENSG00000135913	USP37	ubiquitin specific peptidase 37 [Source:HGNC Symbol;Acc:HGNC:20063]	0.364	0.007129	0.3688	0.01916	0.2991	0.05563
ENSG00000065413	ANKRD44	ankyrin repeat domain 44 [Source:HGNC Symbol;Acc:HGNC:25259]	0.364	0.01045	0.3667	0.01649	0.4003	0.01791
ENSG00000126821	SGPP1	sphingosine-1-phosphate phosphatase 1 [Source:HGNC Symbol;Acc:HGNC:17720]	0.3639	0.05083	0.3654	0.0685	0.3168	0.1521
ENSG00000140511	HAPLN3	hyaluronan and proteoglycan link protein 3 [Source:HGNC Symbol;Acc:HGNC:21446]	0.3638	0.4838	0.3667	0.4493	0.2612	0.6937
ENSG00000145779	TNFAIP8	TNF alpha induced protein 8 [Source:HGNC Symbol;Acc:HGNC:17260]	0.3636	0.01345	0.3657	0.02432	0.3379	0.03758
ENSG00000177054	ZDHHC13	zinc finger DHHC-type containing 13 [Source:HGNC Symbol;Acc:HGNC:18413]	0.3633	0.001534	0.3714	0.007684	0.2744	0.03702
ENSG00000159593	NAE1	NEDD8 activating enzyme E1 subunit 1 [Source:HGNC Symbol;Acc:HGNC:621]	0.3633	0.1015	0.3663	0.1134	0.2771	0.2676
ENSG00000113924	HGD	homogentisate 1,2-dioxygenase [Source:HGNC Symbol;Acc:HGNC:4892]	0.3631	0.2355	0.3599	0.3176	0.1666	0.6825
ENSG00000114120	SLC25A36	solute carrier family 25 member 36 [Source:HGNC Symbol;Acc:HGNC:25554]	0.3628	0.03155	0.3653	0.0379	0.3334	0.06759
ENSG00000112419	PHACTR2	phosphatase and actin regulator 2 [Source:HGNC Symbol;Acc:HGNC:20956]	0.3626	0.01308	0.3633	0.02531	0.3149	0.07015
ENSG00000102554	KLF5	Kruppel like factor 5 [Source:HGNC Symbol;Acc:HGNC:6349]	0.3623	0.5969	0.3624	0.575	0.1587	0.8746
ENSG00000138496	PARP9	poly(ADP-ribose) polymerase family member 9 [Source:HGNC Symbol;Acc:HGNC:24118]	0.3622	0.1251	0.3637	0.1303	0.3489	0.1859
ENSG00000147894	C9orf72	C9orf72-SMCR8 complex subunit [Source:HGNC Symbol;Acc:HGNC:28337]	0.3621	0.02288	0.3608	0.02832	0.3918	0.03423
ENSG00000028116	VRK2	VRK serine/threonine kinase 2 [Source:HGNC Symbol;Acc:HGNC:12719]	0.362	0.0311	0.3634	0.03751	0.3561	0.05225
ENSG00000109381	ELF2	E74 like ETS transcription factor 2 [Source:HGNC Symbol;Acc:HGNC:3317]	0.3619	0.04234	0.3646	0.04826	0.3727	0.05635
ENSG00000198003	CCDC151	coiled-coil domain containing 151 [Source:HGNC Symbol;Acc:HGNC:28303]	0.3617	0.4301	0.365	0.4611	-0.1013	0.8621
ENSG00000108771	DHX58	DExH-box helicase 58 [Source:HGNC Symbol;Acc:HGNC:29517]	0.3615	0.1891	0.3606	0.1976	0.1897	0.5839
ENSG00000138411	HECW2	HECT, C2 and WW domain containing E3 ubiquitin protein ligase 2 [Source:HGNC Symbol;Acc:HGNC:29853]	0.3615	0.2101	0.3605	0.2627	0.1765	0.6198
ENSG00000108387	SEPTIN4	septin 4 [Source:HGNC Symbol;Acc:HGNC:9165]	0.3614	0.4535	0.3602	0.4737	0.163	0.8103
ENSG00000120519	SLC10A7	solute carrier family 10 member 7 [Source:HGNC Symbol;Acc:HGNC:23088]	0.3613	0.002295	0.3639	0.01238	0.3398	0.02205
ENSG00000028839	TBPL1	TATA-box binding protein like 1 [Source:HGNC Symbol;Acc:HGNC:11589]	0.3612	0.0297	0.3638	0.04822	0.3162	0.1065
ENSG00000066557	LRRC40	leucine rich repeat containing 40 [Source:HGNC Symbol;Acc:HGNC:26004]	0.3611	0.05407	0.363	0.0699	0.2865	0.1567
ENSG00000120539	MASTL	microtubule associated serine/threonine kinase like [Source:HGNC Symbol;Acc:HGNC:19042]	0.3608	0.02283	0.3625	0.03419	0.3322	0.07521
ENSG00000122482	ZNF644	zinc finger protein 644 [Source:HGNC Symbol;Acc:HGNC:29222]	0.3604	0.1005	0.3641	0.1085	0.2959	0.2215
ENSG00000166788	SAAL1	serum amyloid A like 1 [Source:HGNC Symbol;Acc:HGNC:25158]	0.3603	0.0276	0.3628	0.04289	0.318	0.08548
ENSG00000136842	TMOD1	tropomodulin 1 [Source:HGNC Symbol;Acc:HGNC:11871]	0.3603	0.2886	0.3579	0.3649	0.2945	0.4745
ENSG00000184221	OLIG1	oligodendrocyte transcription factor 1 [Source:HGNC Symbol;Acc:HGNC:16983]	0.3603	0.2962	0.3612	0.3413	0.4258	0.2771
ENSG00000111785	RIC8B	RIC8 guanine nucleotide exchange factor B [Source:HGNC Symbol;Acc:HGNC:25555]	0.3602	0.01218	0.3637	0.02746	0.3161	0.04984
ENSG00000179104	TMTC2	transmembrane O-mannosyltransferase targeting cadherins 2 [Source:HGNC Symbol;Acc:HGNC:25440]	0.3601	0.02095	0.3619	0.02889	0.3458	0.04745
ENSG00000095209	TMEM38B	transmembrane protein 38B [Source:HGNC Symbol;Acc:HGNC:25535]	0.3601	0.02684	0.363	0.04139	0.2747	0.1308
ENSG00000115841	RMDN2	regulator of microtubule dynamics 2 [Source:HGNC Symbol;Acc:HGNC:26567]	0.36	0.01327	0.3601	0.02826	0.3476	0.04009
ENSG00000138439	FAM117B	family with sequence similarity 117 member B [Source:HGNC Symbol;Acc:HGNC:14440]	0.36	0.02066	0.3628	0.03054	0.3367	0.05903
ENSG00000079263	SP140	SP140 nuclear body protein [Source:HGNC Symbol;Acc:HGNC:17133]	0.36	0.04571	0.3621	0.06237	0.3091	0.1701
ENSG00000151135	TMEM263	transmembrane protein 263 [Source:HGNC Symbol;Acc:HGNC:28281]	0.36	0.1642	0.3587	0.222	0.2481	0.4169
ENSG00000069943	PIGB	phosphatidylinositol glycan anchor biosynthesis class B [Source:HGNC Symbol;Acc:HGNC:8959]	0.3599	0.02397	0.3619	0.04031	0.3327	0.07584
ENSG00000183878	UTY	ubiquitously transcribed tetratricopeptide repeat containing, Y-linked [Source:HGNC Symbol;Acc:HGNC:12638]	0.3598	0.4988	0.364	0.4737	0.4461	0.5648
ENSG00000106546	AHR	aryl hydrocarbon receptor [Source:HGNC Symbol;Acc:HGNC:348]	0.3596	0.1546	0.3643	0.1644	0.2876	0.364
ENSG00000115415	STAT1	signal transducer and activator of transcription 1 [Source:HGNC Symbol;Acc:HGNC:11362]	0.3596	0.1667	0.3612	0.1695	0.4485	0.113
ENSG00000092295	TGM1	transglutaminase 1 [Source:HGNC Symbol;Acc:HGNC:11777]	0.3593	0.09528	0.36	0.1285	0.382	0.1175
ENSG00000125630	POLR1B	RNA polymerase I subunit B [Source:HGNC Symbol;Acc:HGNC:20454]	0.3593	0.02541	0.3589	0.03988	0.3146	0.1065
ENSG00000146232	NFKBIE	NFKB inhibitor epsilon [Source:HGNC Symbol;Acc:HGNC:7799]	0.3593	0.03759	0.3631	0.04581	0.3948	0.05294
ENSG00000069493	CLEC2D	C-type lectin domain family 2 member D [Source:HGNC Symbol;Acc:HGNC:14351]	0.3589	0.09627	0.3596	0.09582	0.2188	0.3583
ENSG00000140391	TSPAN3	tetraspanin 3 [Source:HGNC Symbol;Acc:HGNC:17752]	0.3587	0.0496	0.3629	0.05589	0.3134	0.1298
ENSG00000113763	UNC5A	unc-5 netrin receptor A [Source:HGNC Symbol;Acc:HGNC:12567]	0.3585	0.2614	0.3635	0.2836	0.4561	0.2012
ENSG00000189007	ADAT2	adenosine deaminase tRNA specific 2 [Source:HGNC Symbol;Acc:HGNC:21172]	0.3585	0.1157	0.3618	0.1262	0.2204	0.4207
ENSG00000152944	MED21	mediator complex subunit 21 [Source:HGNC Symbol;Acc:HGNC:11473]	0.3582	0.03293	0.361	0.04081	0.3216	0.06717
ENSG00000164626	KCNK5	potassium two pore domain channel subfamily K member 5 [Source:HGNC Symbol;Acc:HGNC:6280]	0.3582	0.6509	0.3725	0.6417	0.2676	0.7648
ENSG00000073331	ALPK1	alpha kinase 1 [Source:HGNC Symbol;Acc:HGNC:20917]	0.3578	0.0721	0.3604	0.07435	0.3329	0.09964
ENSG00000163349	HIPK1	homeodomain interacting protein kinase 1 [Source:HGNC Symbol;Acc:HGNC:19006]	0.3578	0.01985	0.3615	0.02674	0.3459	0.04873
ENSG00000184898	RBM43	RNA binding motif protein 43 [Source:HGNC Symbol;Acc:HGNC:24790]	0.3578	0.09959	0.3588	0.1282	0.4561	0.08187
ENSG00000133794	ARNTL	aryl hydrocarbon receptor nuclear translocator like [Source:HGNC Symbol;Acc:HGNC:701]	0.3576	0.01453	0.3594	0.01865	0.3494	0.02894
ENSG00000073737	DHRS9	dehydrogenase/reductase 9 [Source:HGNC Symbol;Acc:HGNC:16888]	0.3575	0.2642	0.3571	0.2674	0.3486	0.372
ENSG00000023909	GCLM	glutamate-cysteine ligase modifier subunit [Source:HGNC Symbol;Acc:HGNC:4312]	0.3572	0.2268	0.3572	0.2426	0.2989	0.3521
ENSG00000100664	EIF5	eukaryotic translation initiation factor 5 [Source:HGNC Symbol;Acc:HGNC:3299]	0.3572	0.002347	0.359	0.006398	0.4223	0.004759
ENSG00000156502	SUPV3L1	Suv3 like RNA helicase [Source:HGNC Symbol;Acc:HGNC:11471]	0.3571	0.07182	0.3598	0.08164	0.3327	0.1142
ENSG00000123240	OPTN	optineurin [Source:HGNC Symbol;Acc:HGNC:17142]	0.357	0.3468	0.3569	0.355	-0.01941	0.973
ENSG00000013503	POLR3B	RNA polymerase III subunit B [Source:HGNC Symbol;Acc:HGNC:30348]	0.3568	0.02625	0.3587	0.0498	0.3664	0.04708
ENSG00000147601	TERF1	telomeric repeat binding factor 1 [Source:HGNC Symbol;Acc:HGNC:11728]	0.3567	0.00664	0.3612	0.01879	0.2867	0.05113
ENSG00000110042	DTX4	deltex E3 ubiquitin ligase 4 [Source:HGNC Symbol;Acc:HGNC:29151]	0.3564	0.0761	0.3591	0.08533	0.3685	0.0872
ENSG00000120798	NR2C1	nuclear receptor subfamily 2 group C member 1 [Source:HGNC Symbol;Acc:HGNC:7971]	0.3562	0.03074	0.358	0.03881	0.265	0.1453
ENSG00000034677	RNF19A	ring finger protein 19A, RBR E3 ubiquitin protein ligase [Source:HGNC Symbol;Acc:HGNC:13432]	0.356	0.1079	0.3589	0.1098	0.3485	0.1409
ENSG00000105327	BBC3	BCL2 binding component 3 [Source:HGNC Symbol;Acc:HGNC:17868]	0.3559	0.1552	0.3568	0.1703	0.3787	0.1932
ENSG00000172183	ISG20	interferon stimulated exonuclease gene 20 [Source:HGNC Symbol;Acc:HGNC:6130]	0.3558	0.4281	0.3551	0.4028	0.02031	0.9727
ENSG00000151704	KCNJ1	potassium inwardly rectifying channel subfamily J member 1 [Source:HGNC Symbol;Acc:HGNC:6255]	0.3557	0.1642	0.3599	0.1812	0.3242	0.2844
ENSG00000151687	ANKAR	ankyrin and armadillo repeat containing [Source:HGNC Symbol;Acc:HGNC:26350]	0.3555	0.0407	0.3646	0.07719	0.2767	0.1653
ENSG00000070718	AP3M2	adaptor related protein complex 3 subunit mu 2 [Source:HGNC Symbol;Acc:HGNC:570]	0.3551	0.08327	0.3586	0.1019	0.3334	0.1603
ENSG00000127720	METTL25	methyltransferase like 25 [Source:HGNC Symbol;Acc:HGNC:26228]	0.3551	0.01683	0.3574	0.03108	0.3216	0.0453
ENSG00000242689	CNTF	ciliary neurotrophic factor [Source:HGNC Symbol;Acc:HGNC:2169]	0.355	0.0374	0.3582	0.07014	0.348	0.09744
ENSG00000129317	PUS7L	pseudouridine synthase 7 like [Source:HGNC Symbol;Acc:HGNC:25276]	0.3549	0.03407	0.3575	0.05432	0.2954	0.1004
ENSG00000082258	CCNT2	cyclin T2 [Source:HGNC Symbol;Acc:HGNC:1600]	0.3548	0.01657	0.357	0.021	0.2931	0.0587
ENSG00000111615	KRR1	KRR1 small subunit processome component homolog [Source:HGNC Symbol;Acc:HGNC:5176]	0.3547	0.02771	0.3577	0.04103	0.2959	0.102
ENSG00000171681	ATF7IP	activating transcription factor 7 interacting protein [Source:HGNC Symbol;Acc:HGNC:20092]	0.3547	0.04055	0.3545	0.04704	0.3082	0.1162
ENSG00000146278	PNRC1	proline rich nuclear receptor coactivator 1 [Source:HGNC Symbol;Acc:HGNC:17278]	0.3547	0.07125	0.3548	0.07792	0.3424	0.1187
ENSG00000168301	KCTD6	potassium channel tetramerization domain containing 6 [Source:HGNC Symbol;Acc:HGNC:22235]	0.3546	0.008274	0.3578	0.02217	0.3028	0.06543
ENSG00000149571	KIRREL3	kirre like nephrin family adhesion molecule 3 [Source:HGNC Symbol;Acc:HGNC:23204]	0.3546	0.3178	0.3562	0.3404	0.3607	0.3985
ENSG00000164031	DNAJB14	DnaJ heat shock protein family (Hsp40) member B14 [Source:HGNC Symbol;Acc:HGNC:25881]	0.3543	0.0268	0.3553	0.0326	0.2902	0.0917
ENSG00000253710	ALG11	ALG11 alpha-1,2-mannosyltransferase [Source:HGNC Symbol;Acc:HGNC:32456]	0.3543	0.03593	0.357	0.05185	0.3165	0.0815
ENSG00000070761	CFAP20	cilia and flagella associated protein 20 [Source:HGNC Symbol;Acc:HGNC:29523]	0.3542	0.0855	0.3543	0.09619	0.266	0.2735
ENSG00000138670	RASGEF1B	RasGEF domain family member 1B [Source:HGNC Symbol;Acc:HGNC:24881]	0.354	0.3875	0.3618	0.349	0.35	0.4699
ENSG00000146592	CREB5	cAMP responsive element binding protein 5 [Source:HGNC Symbol;Acc:HGNC:16844]	0.3538	0.07819	0.3553	0.09173	0.3572	0.09678
ENSG00000096063	SRPK1	SRSF protein kinase 1 [Source:HGNC Symbol;Acc:HGNC:11305]	0.3535	0.004527	0.3555	0.01996	0.3372	0.02897
ENSG00000279765		novel protein	0.3535	0.02017	0.3551	0.02609	0.3633	0.04009
ENSG00000134028	ADAMDEC1	ADAM like decysin 1 [Source:HGNC Symbol;Acc:HGNC:16299]	0.3532	0.3786	0.3508	0.4001	0.6572	0.1883
ENSG00000197937	ZNF347	zinc finger protein 347 [Source:HGNC Symbol;Acc:HGNC:16447]	0.3532	0.3109	0.3541	0.3403	0.2863	0.5065
ENSG00000048052	HDAC9	histone deacetylase 9 [Source:HGNC Symbol;Acc:HGNC:14065]	0.3528	0.09589	0.3541	0.1013	0.3042	0.2405
ENSG00000165409	TSHR	thyroid stimulating hormone receptor [Source:HGNC Symbol;Acc:HGNC:12373]	0.3525	0.3105	0.3546	0.3463	0.3251	0.4526
ENSG00000173588	CEP83	centrosomal protein 83 [Source:HGNC Symbol;Acc:HGNC:17966]	0.3523	0.04315	0.3553	0.05755	0.2793	0.1716
ENSG00000118520	ARG1	arginase 1 [Source:HGNC Symbol;Acc:HGNC:663]	0.3523	0.123	0.3554	0.1535	0.2453	0.3663
ENSG00000102078	SLC25A14	solute carrier family 25 member 14 [Source:HGNC Symbol;Acc:HGNC:10984]	0.3519	0.004106	0.3582	0.01638	0.2884	0.04543
ENSG00000166233	ARIH1	ariadne RBR E3 ubiquitin protein ligase 1 [Source:HGNC Symbol;Acc:HGNC:689]	0.3518	0.09147	0.3546	0.09563	0.3279	0.1292
ENSG00000152601	MBNL1	muscleblind like splicing regulator 1 [Source:HGNC Symbol;Acc:HGNC:6923]	0.3516	0.003266	0.3539	0.007833	0.4306	0.007773
ENSG00000166762	CATSPER2	cation channel sperm associated 2 [Source:HGNC Symbol;Acc:HGNC:18810]	0.3516	0.3988	0.3542	0.3934	0.5297	0.3613
ENSG00000172244	C5orf34	chromosome 5 open reading frame 34 [Source:HGNC Symbol;Acc:HGNC:24738]	0.3515	0.34	0.3516	0.3926	0.5654	0.1493
ENSG00000165487	MICU2	mitochondrial calcium uptake 2 [Source:HGNC Symbol;Acc:HGNC:31830]	0.3513	0.05547	0.354	0.06191	0.2864	0.1344
ENSG00000271949		novel transcript, LRRC8C-LRRC8D readthrough	0.3513	0.2548	0.3564	0.2672	0.1643	0.6967
ENSG00000104883	PEX11G	peroxisomal biogenesis factor 11 gamma [Source:HGNC Symbol;Acc:HGNC:20208]	0.3511	0.2251	0.3522	0.2476	0.4018	0.2369
ENSG00000128923	MINDY2	MINDY lysine 48 deubiquitinase 2 [Source:HGNC Symbol;Acc:HGNC:26954]	0.3511	0.006814	0.3532	0.02183	0.3386	0.02483
ENSG00000118276	B4GALT6	beta-1,4-galactosyltransferase 6 [Source:HGNC Symbol;Acc:HGNC:929]	0.3511	0.1379	0.3499	0.1891	0.3725	0.1757
ENSG00000151665	PIGF	phosphatidylinositol glycan anchor biosynthesis class F [Source:HGNC Symbol;Acc:HGNC:8962]	0.351	0.01199	0.353	0.02531	0.3189	0.04984
ENSG00000170581	STAT2	signal transducer and activator of transcription 2 [Source:HGNC Symbol;Acc:HGNC:11363]	0.3507	0.08736	0.3513	0.09342	0.3728	0.08548
ENSG00000058729	RIOK2	RIO kinase 2 [Source:HGNC Symbol;Acc:HGNC:18999]	0.3506	0.0407	0.3512	0.06273	0.348	0.09678
ENSG00000165195	PIGA	phosphatidylinositol glycan anchor biosynthesis class A [Source:HGNC Symbol;Acc:HGNC:8957]	0.3503	0.07289	0.3525	0.08154	0.2551	0.2301
ENSG00000175354	PTPN2	protein tyrosine phosphatase non-receptor type 2 [Source:HGNC Symbol;Acc:HGNC:9650]	0.35	0.03022	0.352	0.03702	0.3254	0.05209
ENSG00000159267	HLCS	holocarboxylase synthetase [Source:HGNC Symbol;Acc:HGNC:4976]	0.35	0.1609	0.3539	0.1838	0.42	0.1281
ENSG00000106701	FSD1L	fibronectin type III and SPRY domain containing 1 like [Source:HGNC Symbol;Acc:HGNC:13753]	0.3496	0.0123	0.353	0.02798	0.2829	0.08279
ENSG00000163214	DHX57	DExH-box helicase 57 [Source:HGNC Symbol;Acc:HGNC:20086]	0.3496	0.02178	0.3528	0.02823	0.2996	0.07169
ENSG00000047648	ARHGAP6	Rho GTPase activating protein 6 [Source:HGNC Symbol;Acc:HGNC:676]	0.3494	0.4886	0.3521	0.509	-0.2124	0.7768
ENSG00000164649	CDCA7L	cell division cycle associated 7 like [Source:HGNC Symbol;Acc:HGNC:30777]	0.3491	0.196	0.3469	0.2345	0.4249	0.1677
ENSG00000144218	AFF3	AF4/FMR2 family member 3 [Source:HGNC Symbol;Acc:HGNC:6473]	0.3488	0.2928	0.3527	0.2947	0.1656	0.7259
ENSG00000107362	ABHD17B	abhydrolase domain containing 17B [Source:HGNC Symbol;Acc:HGNC:24278]	0.3483	0.05169	0.3504	0.06951	0.2841	0.1662
ENSG00000013441	CLK1	CDC like kinase 1 [Source:HGNC Symbol;Acc:HGNC:2068]	0.3482	0.009881	0.3489	0.0163	0.3848	0.01251
ENSG00000256206		novel protein	0.3479	0.1921	0.3524	0.202	0.3701	0.2296
ENSG00000100290	BIK	BCL2 interacting killer [Source:HGNC Symbol;Acc:HGNC:1051]	0.3477	0.3087	0.3505	0.3543	0.18	0.6045
ENSG00000168329	CX3CR1	C-X3-C motif chemokine receptor 1 [Source:HGNC Symbol;Acc:HGNC:2558]	0.3477	0.4673	0.3469	0.4512	0.1557	0.7886
ENSG00000176853	FAM91A1	family with sequence similarity 91 member A1 [Source:HGNC Symbol;Acc:HGNC:26306]	0.3477	0.05779	0.3497	0.06404	0.3495	0.07355
ENSG00000163960	UBXN7	UBX domain protein 7 [Source:HGNC Symbol;Acc:HGNC:29119]	0.3475	0.02296	0.3512	0.02878	0.3063	0.06144
ENSG00000185947	ZNF267	zinc finger protein 267 [Source:HGNC Symbol;Acc:HGNC:13060]	0.3475	0.08462	0.3496	0.08942	0.3003	0.172
ENSG00000089091	DZANK1	double zinc ribbon and ankyrin repeat domains 1 [Source:HGNC Symbol;Acc:HGNC:15858]	0.347	0.05373	0.339	0.1225	0.3451	0.1116
ENSG00000135205	CCDC146	coiled-coil domain containing 146 [Source:HGNC Symbol;Acc:HGNC:29296]	0.3467	0.04193	0.3502	0.06085	0.3284	0.09744
ENSG00000145349	CAMK2D	calcium/calmodulin dependent protein kinase II delta [Source:HGNC Symbol;Acc:HGNC:1462]	0.3466	0.1354	0.3487	0.132	0.2709	0.2783
ENSG00000166881	NEMP1	nuclear envelope integral membrane protein 1 [Source:HGNC Symbol;Acc:HGNC:29001]	0.3465	0.04045	0.3512	0.05455	0.2214	0.2916
ENSG00000240857	RDH14	retinol dehydrogenase 14 [Source:HGNC Symbol;Acc:HGNC:19979]	0.3457	0.1643	0.3447	0.2033	0.3638	0.2404
ENSG00000075340	ADD2	adducin 2 [Source:HGNC Symbol;Acc:HGNC:244]	0.3455	0.5196	0.3557	0.5042	0.5995	0.4203
ENSG00000278311	GGNBP2	gametogenetin binding protein 2 [Source:HGNC Symbol;Acc:HGNC:19357]	0.3455	0.003912	0.3483	0.008766	0.3442	0.01251
ENSG00000162551	ALPL	alkaline phosphatase, biomineralization associated [Source:HGNC Symbol;Acc:HGNC:438]	0.3452	0.6774	0.3381	0.6922	0.2405	0.8297
ENSG00000213639	PPP1CB	protein phosphatase 1 catalytic subunit beta [Source:HGNC Symbol;Acc:HGNC:9282]	0.3452	0.08374	0.3482	0.09326	0.2618	0.2415
ENSG00000054523	KIF1B	kinesin family member 1B [Source:HGNC Symbol;Acc:HGNC:16636]	0.3451	0.01644	0.3469	0.02218	0.3397	0.03477
ENSG00000146021	KLHL3	kelch like family member 3 [Source:HGNC Symbol;Acc:HGNC:6354]	0.3451	0.2392	0.352	0.2763	0.1112	0.7525
ENSG00000164082	GRM2	glutamate metabotropic receptor 2 [Source:HGNC Symbol;Acc:HGNC:4594]	0.3447	0.3698	0.3422	0.4226	0.3239	0.4674
ENSG00000139946	PELI2	pellino E3 ubiquitin protein ligase family member 2 [Source:HGNC Symbol;Acc:HGNC:8828]	0.3446	0.02055	0.3469	0.02685	0.3471	0.0323
ENSG00000118507	AKAP7	A-kinase anchoring protein 7 [Source:HGNC Symbol;Acc:HGNC:377]	0.3445	0.0928	0.3444	0.1052	0.2819	0.2119
ENSG00000145088	EAF2	ELL associated factor 2 [Source:HGNC Symbol;Acc:HGNC:23115]	0.3445	0.05376	0.3441	0.07664	0.2763	0.2002
ENSG00000101745	ANKRD12	ankyrin repeat domain 12 [Source:HGNC Symbol;Acc:HGNC:29135]	0.3442	0.02048	0.3463	0.02639	0.3227	0.04543
ENSG00000147251	DOCK11	dedicator of cytokinesis 11 [Source:HGNC Symbol;Acc:HGNC:23483]	0.3441	0.007921	0.3457	0.01491	0.367	0.01064
ENSG00000168826	ZBTB49	zinc finger and BTB domain containing 49 [Source:HGNC Symbol;Acc:HGNC:19883]	0.3441	0.01818	0.3474	0.03766	0.3027	0.08709
ENSG00000216937	CCDC7	coiled-coil domain containing 7 [Source:HGNC Symbol;Acc:HGNC:26533]	0.3438	0.1278	0.346	0.1478	0.3546	0.173
ENSG00000077458	FAM76B	family with sequence similarity 76 member B [Source:HGNC Symbol;Acc:HGNC:28492]	0.3436	0.002464	0.3459	0.007871	0.292	0.02965
ENSG00000130518	IQCN	IQ motif containing N [Source:HGNC Symbol;Acc:HGNC:29350]	0.3431	0.1273	0.3459	0.1486	0.3581	0.1871
ENSG00000219481	NBPF1	NBPF member 1 [Source:HGNC Symbol;Acc:HGNC:26088]	0.3431	0.1771	0.3449	0.1859	0.3042	0.2618
ENSG00000185480	PARPBP	PARP1 binding protein [Source:HGNC Symbol;Acc:HGNC:26074]	0.343	0.1909	0.3424	0.2666	0.2612	0.4124
ENSG00000168556	ING2	inhibitor of growth family member 2 [Source:HGNC Symbol;Acc:HGNC:6063]	0.3428	0.1002	0.3432	0.1251	0.3754	0.08716
ENSG00000198429	ZNF69	zinc finger protein 69 [Source:HGNC Symbol;Acc:HGNC:13138]	0.3428	0.2113	0.3486	0.2152	0.2119	0.5215
ENSG00000138660	AP1AR	adaptor related protein complex 1 associated regulatory protein [Source:HGNC Symbol;Acc:HGNC:28808]	0.3427	0.006967	0.3446	0.01879	0.3068	0.0404
ENSG00000198087	CD2AP	CD2 associated protein [Source:HGNC Symbol;Acc:HGNC:14258]	0.3426	0.05336	0.3449	0.06567	0.3177	0.1283
ENSG00000183023	SLC8A1	solute carrier family 8 member A1 [Source:HGNC Symbol;Acc:HGNC:11068]	0.3424	0.003715	0.3442	0.008658	0.3569	0.007913
ENSG00000146143	PRIM2	DNA primase subunit 2 [Source:HGNC Symbol;Acc:HGNC:9370]	0.3424	0.04761	0.3467	0.07488	0.316	0.1033
ENSG00000122484	RPAP2	RNA polymerase II associated protein 2 [Source:HGNC Symbol;Acc:HGNC:25791]	0.3423	0.01727	0.3461	0.0331	0.2708	0.1051
ENSG00000109670	FBXW7	F-box and WD repeat domain containing 7 [Source:HGNC Symbol;Acc:HGNC:16712]	0.3423	0.02066	0.3443	0.02784	0.3566	0.02231
ENSG00000164597	COG5	component of oligomeric golgi complex 5 [Source:HGNC Symbol;Acc:HGNC:14857]	0.3423	0.02651	0.3449	0.03511	0.2817	0.08106
ENSG00000188906	LRRK2	leucine rich repeat kinase 2 [Source:HGNC Symbol;Acc:HGNC:18618]	0.3421	0.05573	0.3425	0.06512	0.4576	0.02823
ENSG00000066422	ZBTB11	zinc finger and BTB domain containing 11 [Source:HGNC Symbol;Acc:HGNC:16740]	0.3418	0.01036	0.3449	0.01649	0.3098	0.0374
ENSG00000103642	LACTB	lactamase beta [Source:HGNC Symbol;Acc:HGNC:16468]	0.3418	0.01417	0.3452	0.02912	0.3466	0.03482
ENSG00000188026	RILPL1	Rab interacting lysosomal protein like 1 [Source:HGNC Symbol;Acc:HGNC:26814]	0.3417	0.1792	0.3442	0.2215	0.3354	0.2405
ENSG00000112232	KHDRBS2	KH RNA binding domain containing, signal transduction associated 2 [Source:HGNC Symbol;Acc:HGNC:18114]	0.3412	0.1425	0.3424	0.1746	0.3049	0.2779
ENSG00000205208	C4orf46	chromosome 4 open reading frame 46 [Source:HGNC Symbol;Acc:HGNC:27320]	0.3412	0.01047	0.3425	0.03335	0.341	0.03531
ENSG00000169246	NPIPB3	nuclear pore complex interacting protein family member B3 [Source:HGNC Symbol;Acc:HGNC:28989]	0.3411	0.2638	0.3441	0.2593	0.07417	0.8475
ENSG00000170142	UBE2E1	ubiquitin conjugating enzyme E2 E1 [Source:HGNC Symbol;Acc:HGNC:12477]	0.3409	0.02143	0.3448	0.0277	0.3058	0.05361
ENSG00000149346	SLX4IP	SLX4 interacting protein [Source:HGNC Symbol;Acc:HGNC:16225]	0.3407	0.09584	0.3431	0.1146	0.3364	0.1294
ENSG00000176083	ZNF683	zinc finger protein 683 [Source:HGNC Symbol;Acc:HGNC:28495]	0.3407	0.7091	0.3336	0.7718	-0.5768	0.5871
ENSG00000183741	CBX6	chromobox 6 [Source:HGNC Symbol;Acc:HGNC:1556]	0.3406	0.03131	0.3427	0.03881	0.4088	0.01618
ENSG00000164548	TRA2A	transformer 2 alpha homolog [Source:HGNC Symbol;Acc:HGNC:16645]	0.3406	0.03801	0.3439	0.04497	0.2899	0.08978
ENSG00000086061	DNAJA1	DnaJ heat shock protein family (Hsp40) member A1 [Source:HGNC Symbol;Acc:HGNC:5229]	0.3404	0.02279	0.3411	0.0275	0.3131	0.05309
ENSG00000121210	TMEM131L	transmembrane 131 like [Source:HGNC Symbol;Acc:HGNC:29146]	0.34	0.004014	0.3418	0.007553	0.3227	0.01332
ENSG00000011566	MAP4K3	mitogen-activated protein kinase kinase kinase kinase 3 [Source:HGNC Symbol;Acc:HGNC:6865]	0.3392	0.07062	0.3423	0.08154	0.3347	0.092
ENSG00000118246	FASTKD2	FAST kinase domains 2 [Source:HGNC Symbol;Acc:HGNC:29160]	0.3392	0.0699	0.3422	0.08269	0.295	0.155
ENSG00000000419	DPM1	dolichyl-phosphate mannosyltransferase subunit 1, catalytic [Source:HGNC Symbol;Acc:HGNC:3005]	0.3387	0.004262	0.3415	0.01157	0.3049	0.02391
ENSG00000117475	BLZF1	basic leucine zipper nuclear factor 1 [Source:HGNC Symbol;Acc:HGNC:1065]	0.3386	0.04082	0.3416	0.06066	0.2569	0.1772
ENSG00000120334	CENPL	centromere protein L [Source:HGNC Symbol;Acc:HGNC:17879]	0.3384	0.1439	0.3316	0.2284	0.3316	0.2888
ENSG00000086619	ERO1B	endoplasmic reticulum oxidoreductase 1 beta [Source:HGNC Symbol;Acc:HGNC:14355]	0.3382	0.02506	0.3424	0.04103	0.2469	0.1552
ENSG00000152219	ARL14EP	ADP ribosylation factor like GTPase 14 effector protein [Source:HGNC Symbol;Acc:HGNC:26798]	0.3381	0.1523	0.3415	0.1687	0.264	0.3749
ENSG00000081923	ATP8B1	ATPase phospholipid transporting 8B1 [Source:HGNC Symbol;Acc:HGNC:3706]	0.338	0.01512	0.341	0.02878	0.2633	0.1106
ENSG00000024048	UBR2	ubiquitin protein ligase E3 component n-recognin 2 [Source:HGNC Symbol;Acc:HGNC:21289]	0.3371	0.000716	0.3391	0.003421	0.3432	0.004759
ENSG00000198160	MIER1	MIER1 transcriptional regulator [Source:HGNC Symbol;Acc:HGNC:29657]	0.3371	0.02361	0.339	0.02959	0.3074	0.05189
ENSG00000134987	WDR36	WD repeat domain 36 [Source:HGNC Symbol;Acc:HGNC:30696]	0.337	0.02057	0.3384	0.03511	0.312	0.0487
ENSG00000165322	ARHGAP12	Rho GTPase activating protein 12 [Source:HGNC Symbol;Acc:HGNC:16348]	0.3361	0.04732	0.3369	0.06518	0.3283	0.08704
ENSG00000090339	ICAM1	intercellular adhesion molecule 1 [Source:HGNC Symbol;Acc:HGNC:5344]	0.336	0.1053	0.3394	0.1132	0.3582	0.1044
ENSG00000241962		novel protein, C2orf15-MRPL30-novel lincRNA readthrough	0.3359	0.02286	0.3326	0.05997	0.3281	0.05006
ENSG00000162654	GBP4	guanylate binding protein 4 [Source:HGNC Symbol;Acc:HGNC:20480]	0.3359	0.4171	0.3382	0.3437	0.2618	0.5305
ENSG00000197381	ADARB1	adenosine deaminase RNA specific B1 [Source:HGNC Symbol;Acc:HGNC:226]	0.3359	0.2115	0.3378	0.2274	0.2533	0.4547
ENSG00000166128	RAB8B	RAB8B, member RAS oncogene family [Source:HGNC Symbol;Acc:HGNC:30273]	0.3353	0.1027	0.3374	0.1062	0.2953	0.1757
ENSG00000129757	CDKN1C	cyclin dependent kinase inhibitor 1C [Source:HGNC Symbol;Acc:HGNC:1786]	0.3352	0.389	0.3335	0.4072	0.0008152	0.9992
ENSG00000148680	HTR7	5-hydroxytryptamine receptor 7 [Source:HGNC Symbol;Acc:HGNC:5302]	0.3352	0.2428	0.3349	0.2527	0.2507	0.4387
ENSG00000006576	PHTF2	putative homeodomain transcription factor 2 [Source:HGNC Symbol;Acc:HGNC:13411]	0.3351	0.01627	0.3377	0.02284	0.2794	0.05209
ENSG00000117016	RIMS3	regulating synaptic membrane exocytosis 3 [Source:HGNC Symbol;Acc:HGNC:21292]	0.335	0.2343	0.335	0.2662	0.3228	0.3404
ENSG00000080345	RIF1	replication timing regulatory factor 1 [Source:HGNC Symbol;Acc:HGNC:23207]	0.335	0.04369	0.3373	0.05185	0.2514	0.1498
ENSG00000114739	ACVR2B	activin A receptor type 2B [Source:HGNC Symbol;Acc:HGNC:174]	0.3347	0.264	0.342	0.2879	0.1662	0.6916
ENSG00000066427	ATXN3	ataxin 3 [Source:HGNC Symbol;Acc:HGNC:7106]	0.3347	0.02107	0.3377	0.02823	0.2738	0.07737
ENSG00000141314	RHBDL3	rhomboid like 3 [Source:HGNC Symbol;Acc:HGNC:16502]	0.3347	0.5861	0.3444	0.5845	0.9984	0.2381
ENSG00000104047	DTWD1	DTW domain containing 1 [Source:HGNC Symbol;Acc:HGNC:30926]	0.3343	0.07869	0.336	0.107	0.3611	0.08582
ENSG00000094975	SUCO	SUN domain containing ossification factor [Source:HGNC Symbol;Acc:HGNC:1240]	0.3343	0.02091	0.3367	0.02832	0.2723	0.07047
ENSG00000064012	CASP8	caspase 8 [Source:HGNC Symbol;Acc:HGNC:1509]	0.3342	0.0634	0.3365	0.07024	0.345	0.09964
ENSG00000197969	VPS13A	vacuolar protein sorting 13 homolog A [Source:HGNC Symbol;Acc:HGNC:1908]	0.3342	0.1116	0.336	0.1216	0.1992	0.4041
ENSG00000189227	C15orf61	chromosome 15 open reading frame 61 [Source:HGNC Symbol;Acc:HGNC:34453]	0.3341	0.05967	0.3349	0.08548	0.2856	0.1569
ENSG00000176018	LYSMD3	LysM domain containing 3 [Source:HGNC Symbol;Acc:HGNC:26969]	0.334	0.03442	0.3366	0.05526	0.2549	0.1598
ENSG00000115271	GCA	grancalcin [Source:HGNC Symbol;Acc:HGNC:15990]	0.3338	0.2077	0.3322	0.2235	0.3665	0.1936
ENSG00000033178	UBA6	ubiquitin like modifier activating enzyme 6 [Source:HGNC Symbol;Acc:HGNC:25581]	0.3337	0.1975	0.3357	0.1978	0.259	0.3415
ENSG00000075884	ARHGAP15	Rho GTPase activating protein 15 [Source:HGNC Symbol;Acc:HGNC:21030]	0.3336	0.01371	0.3348	0.02047	0.3171	0.03482
ENSG00000174564	IL20RB	interleukin 20 receptor subunit beta [Source:HGNC Symbol;Acc:HGNC:6004]	0.3335	0.04129	0.3372	0.07454	0.2969	0.1134
ENSG00000165028	NIPSNAP3B	nipsnap homolog 3B [Source:HGNC Symbol;Acc:HGNC:23641]	0.3335	0.3418	0.335	0.3572	0.05973	0.8928
ENSG00000117009	KMO	kynurenine 3-monooxygenase [Source:HGNC Symbol;Acc:HGNC:6381]	0.3334	0.06562	0.3357	0.09134	0.3553	0.0929
ENSG00000178502	KLHL11	kelch like family member 11 [Source:HGNC Symbol;Acc:HGNC:19008]	0.3331	0.005627	0.3349	0.01652	0.2899	0.03353
ENSG00000086200	IPO11	importin 11 [Source:HGNC Symbol;Acc:HGNC:20628]	0.3329	0.1064	0.3376	0.1303	0.2899	0.1971
ENSG00000166483	WEE1	WEE1 G2 checkpoint kinase [Source:HGNC Symbol;Acc:HGNC:12761]	0.3327	0.5402	0.3366	0.5564	0.1513	0.8113
ENSG00000111181	SLC6A12	solute carrier family 6 member 12 [Source:HGNC Symbol;Acc:HGNC:11045]	0.3326	0.1974	0.3321	0.2152	0.3395	0.2475
ENSG00000185347	TEDC1	tubulin epsilon and delta complex 1 [Source:HGNC Symbol;Acc:HGNC:20127]	0.3326	0.3909	0.3435	0.3904	0.4068	0.3638
ENSG00000159147	DONSON	downstream neighbor of SON [Source:HGNC Symbol;Acc:HGNC:2993]	0.3323	0.06515	0.3388	0.09582	0.2797	0.1428
ENSG00000115159	GPD2	glycerol-3-phosphate dehydrogenase 2 [Source:HGNC Symbol;Acc:HGNC:4456]	0.3321	0.03798	0.3332	0.04861	0.2917	0.1081
ENSG00000107593	PKD2L1	polycystin 2 like 1, transient receptor potential cation channel [Source:HGNC Symbol;Acc:HGNC:9011]	0.3319	0.6368	0.3257	0.6695	-0.4234	0.6471
ENSG00000182986	ZNF320	zinc finger protein 320 [Source:HGNC Symbol;Acc:HGNC:13842]	0.3314	0.07774	0.334	0.09788	0.2395	0.2455
ENSG00000271425	NBPF10	NBPF member 10 [Source:HGNC Symbol;Acc:HGNC:31992]	0.3312	0.1196	0.3341	0.1187	0.2274	0.2891
ENSG00000090061	CCNK	cyclin K [Source:HGNC Symbol;Acc:HGNC:1596]	0.3311	0.09687	0.3343	0.106	0.305	0.1608
ENSG00000170632	ARMC10	armadillo repeat containing 10 [Source:HGNC Symbol;Acc:HGNC:21706]	0.331	0.02423	0.3319	0.0354	0.2053	0.1608
ENSG00000172159	FRMD3	FERM domain containing 3 [Source:HGNC Symbol;Acc:HGNC:24125]	0.3309	0.1569	0.3305	0.1727	0.2073	0.4881
ENSG00000156273	BACH1	BTB domain and CNC homolog 1 [Source:HGNC Symbol;Acc:HGNC:935]	0.3308	0.06803	0.331	0.08068	0.4042	0.04006
ENSG00000021762	OSBPL5	oxysterol binding protein like 5 [Source:HGNC Symbol;Acc:HGNC:16392]	0.3299	0.03522	0.3314	0.04141	0.3135	0.07275
ENSG00000145996	CDKAL1	CDK5 regulatory subunit associated protein 1 like 1 [Source:HGNC Symbol;Acc:HGNC:21050]	0.3297	0.03099	0.3336	0.04704	0.267	0.1059
ENSG00000111011	RSRC2	arginine and serine rich coiled-coil 2 [Source:HGNC Symbol;Acc:HGNC:30559]	0.3296	0.01422	0.3324	0.02235	0.3472	0.02358
ENSG00000124496	TRERF1	transcriptional regulating factor 1 [Source:HGNC Symbol;Acc:HGNC:18273]	0.3293	0.01034	0.3301	0.01745	0.357	0.01174
ENSG00000138131	LOXL4	lysyl oxidase like 4 [Source:HGNC Symbol;Acc:HGNC:17171]	0.3291	0.03929	0.3364	0.06527	0.2659	0.155
ENSG00000148120	AOPEP	aminopeptidase O (putative) [Source:HGNC Symbol;Acc:HGNC:1361]	0.3291	0.07815	0.333	0.09894	0.2737	0.1945
ENSG00000048649	RSF1	remodeling and spacing factor 1 [Source:HGNC Symbol;Acc:HGNC:18118]	0.329	0.03741	0.3274	0.04139	0.2148	0.1892
ENSG00000111252	SH2B3	SH2B adaptor protein 3 [Source:HGNC Symbol;Acc:HGNC:29605]	0.3289	0.113	0.3326	0.1136	0.3338	0.1352
ENSG00000185972	CCIN	calicin [Source:HGNC Symbol;Acc:HGNC:1568]	0.3286	0.2781	0.3339	0.2975	0.2426	0.505
ENSG00000111224	PARP11	poly(ADP-ribose) polymerase family member 11 [Source:HGNC Symbol;Acc:HGNC:1186]	0.3283	0.03259	0.3303	0.0493	0.3028	0.08977
ENSG00000188994	ZNF292	zinc finger protein 292 [Source:HGNC Symbol;Acc:HGNC:18410]	0.3283	0.03814	0.3299	0.04475	0.2885	0.09165
ENSG00000163328	GPR155	G protein-coupled receptor 155 [Source:HGNC Symbol;Acc:HGNC:22951]	0.3275	0.02062	0.3289	0.03216	0.2844	0.08023
ENSG00000131791	PRKAB2	protein kinase AMP-activated non-catalytic subunit beta 2 [Source:HGNC Symbol;Acc:HGNC:9379]	0.3275	0.03538	0.3279	0.05034	0.2689	0.1106
ENSG00000141741	MIEN1	migration and invasion enhancer 1 [Source:HGNC Symbol;Acc:HGNC:28230]	0.3274	0.4137	0.3169	0.4214	-0.1683	0.6812
ENSG00000182185	RAD51B	RAD51 paralog B [Source:HGNC Symbol;Acc:HGNC:9822]	0.3273	0.02244	0.3289	0.04586	0.3276	0.04208
ENSG00000170876	TMEM43	transmembrane protein 43 [Source:HGNC Symbol;Acc:HGNC:28472]	0.3273	0.2178	0.3321	0.2206	0.2889	0.315
ENSG00000196911	KPNA5	karyopherin subunit alpha 5 [Source:HGNC Symbol;Acc:HGNC:6398]	0.3273	0.06718	0.3292	0.08538	0.2829	0.1476
ENSG00000197580	BCO2	beta-carotene oxygenase 2 [Source:HGNC Symbol;Acc:HGNC:18503]	0.3269	0.2533	0.3317	0.2746	0.1999	0.5801
ENSG00000117115	PADI2	peptidyl arginine deiminase 2 [Source:HGNC Symbol;Acc:HGNC:18341]	0.3268	0.2256	0.3279	0.2294	0.5027	0.1218
ENSG00000107771	CCSER2	coiled-coil serine rich protein 2 [Source:HGNC Symbol;Acc:HGNC:29197]	0.3268	0.003699	0.3287	0.01436	0.3071	0.02013
ENSG00000152558	TMEM123	transmembrane protein 123 [Source:HGNC Symbol;Acc:HGNC:30138]	0.3259	0.04871	0.3262	0.05994	0.3215	0.07914
ENSG00000081386	ZNF510	zinc finger protein 510 [Source:HGNC Symbol;Acc:HGNC:29161]	0.3258	0.04516	0.3297	0.07981	0.3126	0.07796
ENSG00000163714	U2SURP	U2 snRNP associated SURP domain containing [Source:HGNC Symbol;Acc:HGNC:30855]	0.3254	0.0375	0.3283	0.04509	0.2843	0.08582
ENSG00000133641	C12orf29	chromosome 12 open reading frame 29 [Source:HGNC Symbol;Acc:HGNC:25322]	0.3254	0.06314	0.3266	0.1301	0.3164	0.1097
ENSG00000125384	PTGER2	prostaglandin E receptor 2 [Source:HGNC Symbol;Acc:HGNC:9594]	0.3252	0.1514	0.3261	0.1645	0.3627	0.1497
ENSG00000163376	KBTBD8	kelch repeat and BTB domain containing 8 [Source:HGNC Symbol;Acc:HGNC:30691]	0.3252	0.2377	0.3296	0.2622	0.3316	0.3333
ENSG00000007944	MYLIP	myosin regulatory light chain interacting protein [Source:HGNC Symbol;Acc:HGNC:21155]	0.3251	0.09103	0.3249	0.09694	0.3006	0.1979
ENSG00000134352	IL6ST	interleukin 6 signal transducer [Source:HGNC Symbol;Acc:HGNC:6021]	0.3249	0.04605	0.3261	0.05566	0.3084	0.07275
ENSG00000172954	LCLAT1	lysocardiolipin acyltransferase 1 [Source:HGNC Symbol;Acc:HGNC:26756]	0.3248	0.09236	0.3238	0.1413	0.3387	0.1041
ENSG00000099284	MACROH2A2	macroH2A.2 histone [Source:HGNC Symbol;Acc:HGNC:14453]	0.3246	0.2988	0.3313	0.3519	0.1768	0.6514
ENSG00000132549	VPS13B	vacuolar protein sorting 13 homolog B [Source:HGNC Symbol;Acc:HGNC:2183]	0.3246	0.01242	0.3268	0.02035	0.3205	0.02108
ENSG00000133731	IMPA1	inositol monophosphatase 1 [Source:HGNC Symbol;Acc:HGNC:6050]	0.3242	0.1071	0.3273	0.1364	0.3469	0.116
ENSG00000198860	TSEN15	tRNA splicing endonuclease subunit 15 [Source:HGNC Symbol;Acc:HGNC:16791]	0.324	0.0473	0.3259	0.07269	0.3042	0.0992
ENSG00000108256	NUFIP2	nuclear FMR1 interacting protein 2 [Source:HGNC Symbol;Acc:HGNC:17634]	0.3239	0.02667	0.3264	0.03702	0.3542	0.03808
ENSG00000197429	IPP	intracisternal A particle-promoted polypeptide [Source:HGNC Symbol;Acc:HGNC:6108]	0.3239	0.1231	0.3358	0.1927	0.2538	0.3125
ENSG00000213799	ZNF845	zinc finger protein 845 [Source:HGNC Symbol;Acc:HGNC:25112]	0.3239	0.2051	0.3276	0.2339	0.3793	0.2385
ENSG00000125850	OVOL2	ovo like zinc finger 2 [Source:HGNC Symbol;Acc:HGNC:15804]	0.3238	0.5511	0.321	0.6272	0.355	0.527
ENSG00000136051	WASHC4	WASH complex subunit 4 [Source:HGNC Symbol;Acc:HGNC:29174]	0.3234	0.03759	0.3247	0.04695	0.3113	0.06665
ENSG00000155313	USP25	ubiquitin specific peptidase 25 [Source:HGNC Symbol;Acc:HGNC:12624]	0.3232	0.009138	0.3245	0.01555	0.3076	0.01945
ENSG00000143158	MPC2	mitochondrial pyruvate carrier 2 [Source:HGNC Symbol;Acc:HGNC:24515]	0.3227	0.007096	0.3225	0.02663	0.3209	0.02688
ENSG00000284393		novel protein	0.3226	0.2355	0.323	0.2891	0.352	0.3052
ENSG00000092140	G2E3	G2/M-phase specific E3 ubiquitin protein ligase [Source:HGNC Symbol;Acc:HGNC:20338]	0.3225	0.09348	0.325	0.1064	0.2523	0.2215
ENSG00000181544	FANCB	FA complementation group B [Source:HGNC Symbol;Acc:HGNC:3583]	0.3224	0.2977	0.3223	0.3322	0.4166	0.2365
ENSG00000122376	SHLD2	shieldin complex subunit 2 [Source:HGNC Symbol;Acc:HGNC:28773]	0.3223	0.04107	0.3244	0.05047	0.2533	0.1231
ENSG00000243660	ZNF487	zinc finger protein 487 [Source:HGNC Symbol;Acc:HGNC:23488]	0.3222	0.03826	0.323	0.06683	0.3298	0.07145
ENSG00000140030	GPR65	G protein-coupled receptor 65 [Source:HGNC Symbol;Acc:HGNC:4517]	0.3222	0.1393	0.3212	0.161	0.3021	0.2391
ENSG00000150672	DLG2	discs large MAGUK scaffold protein 2 [Source:HGNC Symbol;Acc:HGNC:2901]	0.3221	0.3501	0.3163	0.4603	0.2845	0.3963
ENSG00000174796	THAP6	THAP domain containing 6 [Source:HGNC Symbol;Acc:HGNC:23189]	0.3221	0.05407	0.3254	0.07397	0.2124	0.2682
ENSG00000197599	CCDC154	coiled-coil domain containing 154 [Source:HGNC Symbol;Acc:HGNC:34454]	0.3221	0.1177	0.3221	0.1593	0.3971	0.1064
ENSG00000114857	NKTR	natural killer cell triggering receptor [Source:HGNC Symbol;Acc:HGNC:7833]	0.3219	0.04343	0.3241	0.05298	0.3493	0.07101
ENSG00000198517	MAFK	MAF bZIP transcription factor K [Source:HGNC Symbol;Acc:HGNC:6782]	0.3218	0.1617	0.3269	0.1629	0.3079	0.2324
ENSG00000134571	MYBPC3	myosin binding protein C, cardiac [Source:HGNC Symbol;Acc:HGNC:7551]	0.3216	0.1116	0.3262	0.1245	0.3398	0.1428
ENSG00000172687	ZNF738	zinc finger protein 738 [Source:HGNC Symbol;Acc:HGNC:32469]	0.3215	0.2395	0.3232	0.2531	0.2378	0.5083
ENSG00000205213	LGR4	leucine rich repeat containing G protein-coupled receptor 4 [Source:HGNC Symbol;Acc:HGNC:13299]	0.3215	0.3917	0.3208	0.4164	0.42	0.4172
ENSG00000095261	PSMD5	proteasome 26S subunit, non-ATPase 5 [Source:HGNC Symbol;Acc:HGNC:9563]	0.3212	0.08219	0.3244	0.09447	0.2866	0.1441
ENSG00000151694	ADAM17	ADAM metallopeptidase domain 17 [Source:HGNC Symbol;Acc:HGNC:195]	0.3212	0.1225	0.3249	0.1239	0.2713	0.226
ENSG00000236287	ZBED5	zinc finger BED-type containing 5 [Source:HGNC Symbol;Acc:HGNC:30803]	0.321	0.0425	0.3223	0.05185	0.2076	0.2366
ENSG00000124406	ATP8A1	ATPase phospholipid transporting 8A1 [Source:HGNC Symbol;Acc:HGNC:13531]	0.3209	0.05895	0.3216	0.07351	0.2893	0.1246
ENSG00000168438	CDC40	cell division cycle 40 [Source:HGNC Symbol;Acc:HGNC:17350]	0.3208	0.03183	0.3223	0.04041	0.3168	0.04221
ENSG00000109911	ELP4	elongator acetyltransferase complex subunit 4 [Source:HGNC Symbol;Acc:HGNC:1171]	0.3207	0.03741	0.3229	0.06567	0.2985	0.08106
ENSG00000197045	GMFB	glia maturation factor beta [Source:HGNC Symbol;Acc:HGNC:4373]	0.3207	0.1485	0.3217	0.156	0.2696	0.2477
ENSG00000151332	MBIP	MAP3K12 binding inhibitory protein 1 [Source:HGNC Symbol;Acc:HGNC:20427]	0.3205	0.04679	0.3236	0.06971	0.2759	0.1396
ENSG00000174132	FAM174A	family with sequence similarity 174 member A [Source:HGNC Symbol;Acc:HGNC:24943]	0.3205	0.06835	0.3223	0.09297	0.2205	0.2367
ENSG00000156535	CD109	CD109 molecule [Source:HGNC Symbol;Acc:HGNC:21685]	0.3199	0.5331	0.3178	0.5436	0.4768	0.4372
ENSG00000035115	SH3YL1	SH3 and SYLF domain containing 1 [Source:HGNC Symbol;Acc:HGNC:29546]	0.3197	0.05779	0.322	0.08546	0.2573	0.1592
ENSG00000153291	SLC25A27	solute carrier family 25 member 27 [Source:HGNC Symbol;Acc:HGNC:21065]	0.3196	0.5085	0.3235	0.5221	0.4202	0.4529
ENSG00000109189	USP46	ubiquitin specific peptidase 46 [Source:HGNC Symbol;Acc:HGNC:20075]	0.3193	0.03741	0.3214	0.06156	0.3086	0.07255
ENSG00000120820	GLT8D2	glycosyltransferase 8 domain containing 2 [Source:HGNC Symbol;Acc:HGNC:24890]	0.3192	0.2991	0.3102	0.3079	0.006018	0.9887
ENSG00000139793	MBNL2	muscleblind like splicing regulator 2 [Source:HGNC Symbol;Acc:HGNC:16746]	0.3192	0.1585	0.3227	0.1641	0.3171	0.1907
ENSG00000151640	DPYSL4	dihydropyrimidinase like 4 [Source:HGNC Symbol;Acc:HGNC:3016]	0.3191	0.4888	0.3272	0.5034	0.4897	0.2968
ENSG00000121101	TEX14	testis expressed 14, intercellular bridge forming factor [Source:HGNC Symbol;Acc:HGNC:11737]	0.319	0.3875	0.3194	0.4325	0.2952	0.4553
ENSG00000138768	USO1	USO1 vesicle transport factor [Source:HGNC Symbol;Acc:HGNC:30904]	0.3183	0.01458	0.3203	0.02436	0.2581	0.05868
ENSG00000087077	TRIP6	thyroid hormone receptor interactor 6 [Source:HGNC Symbol;Acc:HGNC:12311]	0.318	0.06986	0.3192	0.09533	0.2003	0.3641
ENSG00000155744	FAM126B	family with sequence similarity 126 member B [Source:HGNC Symbol;Acc:HGNC:28593]	0.318	0.02241	0.3192	0.03326	0.2915	0.04288
ENSG00000119703	ZC2HC1C	zinc finger C2HC-type containing 1C [Source:HGNC Symbol;Acc:HGNC:20354]	0.3178	0.2443	0.3288	0.2683	0.155	0.636
ENSG00000165181	SHOC1	shortage in chiasmata 1 [Source:HGNC Symbol;Acc:HGNC:26535]	0.3176	0.2918	0.3129	0.3827	0.3282	0.3217
ENSG00000145743	FBXL17	F-box and leucine rich repeat protein 17 [Source:HGNC Symbol;Acc:HGNC:13615]	0.3175	0.005473	0.3197	0.01583	0.2723	0.03892
ENSG00000139826	ABHD13	abhydrolase domain containing 13 [Source:HGNC Symbol;Acc:HGNC:20293]	0.3173	0.03833	0.3182	0.04886	0.3012	0.05619
ENSG00000162599	NFIA	nuclear factor I A [Source:HGNC Symbol;Acc:HGNC:7784]	0.3171	0.1073	0.3189	0.1301	0.3229	0.1635
ENSG00000166669	ATF7IP2	activating transcription factor 7 interacting protein 2 [Source:HGNC Symbol;Acc:HGNC:20397]	0.317	0.08686	0.3193	0.111	0.3014	0.1491
ENSG00000085276	MECOM	MDS1 and EVI1 complex locus [Source:HGNC Symbol;Acc:HGNC:3498]	0.3169	0.1966	0.3138	0.2091	0.137	0.622
ENSG00000134627	PIWIL4	piwi like RNA-mediated gene silencing 4 [Source:HGNC Symbol;Acc:HGNC:18444]	0.3169	0.0167	0.3178	0.03227	0.3091	0.04331
ENSG00000105829	BET1	Bet1 golgi vesicular membrane trafficking protein [Source:HGNC Symbol;Acc:HGNC:14562]	0.3168	0.04348	0.3179	0.07981	0.2886	0.1246
ENSG00000169282	KCNAB1	potassium voltage-gated channel subfamily A member regulatory beta subunit 1 [Source:HGNC Symbol;Acc:HGNC:6228]	0.3163	0.1807	0.3176	0.1937	0.2354	0.4326
ENSG00000196092	PAX5	paired box 5 [Source:HGNC Symbol;Acc:HGNC:8619]	0.3163	0.4985	0.3173	0.4933	0.178	0.7875
ENSG00000136108	CKAP2	cytoskeleton associated protein 2 [Source:HGNC Symbol;Acc:HGNC:1990]	0.3162	0.07236	0.3171	0.08779	0.3174	0.1187
ENSG00000166592	RRAD	RRAD, Ras related glycolysis inhibitor and calcium channel regulator [Source:HGNC Symbol;Acc:HGNC:10446]	0.3162	0.6685	0.3218	0.6403	0.9119	0.2176
ENSG00000163818	LZTFL1	leucine zipper transcription factor like 1 [Source:HGNC Symbol;Acc:HGNC:6741]	0.3161	0.01748	0.3191	0.04464	0.2804	0.06868
ENSG00000142102	PGGHG	protein-glucosylgalactosylhydroxylysine glucosidase [Source:HGNC Symbol;Acc:HGNC:26210]	0.316	0.04581	0.3174	0.05222	0.3199	0.07275
ENSG00000198455	ZXDB	zinc finger X-linked duplicated B [Source:HGNC Symbol;Acc:HGNC:13199]	0.3159	0.04779	0.3193	0.07417	0.2876	0.1115
ENSG00000285458		novel protein	0.3159	0.1046	0.314	0.1671	0.384	0.08279
ENSG00000110079	MS4A4A	membrane spanning 4-domains A4A [Source:HGNC Symbol;Acc:HGNC:13371]	0.3157	0.3852	0.3186	0.4212	0.3928	0.3367
ENSG00000278053	DDX52	DExD-box helicase 52 [Source:HGNC Symbol;Acc:HGNC:20038]	0.3156	0.08701	0.3189	0.09805	0.2476	0.2151
ENSG00000131379	C3orf20	chromosome 3 open reading frame 20 [Source:HGNC Symbol;Acc:HGNC:25320]	0.3153	0.2048	0.3178	0.2246	0.4196	0.1276
ENSG00000148481	MINDY3	MINDY lysine 48 deubiquitinase 3 [Source:HGNC Symbol;Acc:HGNC:23578]	0.315	0.03218	0.3169	0.04681	0.2713	0.07275
ENSG00000156384	SFR1	SWI5 dependent homologous recombination repair protein 1 [Source:HGNC Symbol;Acc:HGNC:29574]	0.3148	0.02127	0.3123	0.0636	0.2867	0.08704
ENSG00000165392	WRN	WRN RecQ like helicase [Source:HGNC Symbol;Acc:HGNC:12791]	0.3148	0.08707	0.3179	0.101	0.1991	0.334
ENSG00000105426	PTPRS	protein tyrosine phosphatase receptor type S [Source:HGNC Symbol;Acc:HGNC:9681]	0.3138	0.4296	0.3201	0.4512	0.1436	0.7764
ENSG00000168062	BATF2	basic leucine zipper ATF-like transcription factor 2 [Source:HGNC Symbol;Acc:HGNC:25163]	0.3137	0.5007	0.3124	0.5102	0.2511	0.6933
ENSG00000112029	FBXO5	F-box protein 5 [Source:HGNC Symbol;Acc:HGNC:13584]	0.3136	0.1404	0.3142	0.1792	0.2386	0.3544
ENSG00000115368	WDR75	WD repeat domain 75 [Source:HGNC Symbol;Acc:HGNC:25725]	0.3136	0.1049	0.3163	0.1115	0.2499	0.2248
ENSG00000215252	GOLGA8B	golgin A8 family member B [Source:HGNC Symbol;Acc:HGNC:31973]	0.3135	0.4591	0.3179	0.4493	0.1074	0.8558
ENSG00000152217	SETBP1	SET binding protein 1 [Source:HGNC Symbol;Acc:HGNC:15573]	0.3134	0.2085	0.3172	0.2126	0.241	0.3891
ENSG00000109458	GAB1	GRB2 associated binding protein 1 [Source:HGNC Symbol;Acc:HGNC:4066]	0.3133	0.0293	0.3161	0.04858	0.2847	0.08106
ENSG00000213085	CFAP45	cilia and flagella associated protein 45 [Source:HGNC Symbol;Acc:HGNC:17229]	0.3133	0.2533	0.3179	0.2631	0.3069	0.365
ENSG00000189362	NEMP2	nuclear envelope integral membrane protein 2 [Source:HGNC Symbol;Acc:HGNC:33700]	0.3132	0.0226	0.3166	0.05537	0.256	0.09847
ENSG00000152767	FARP1	FERM, ARH/RhoGEF and pleckstrin domain protein 1 [Source:HGNC Symbol;Acc:HGNC:3591]	0.3132	0.2847	0.3168	0.2944	0.1914	0.6297
ENSG00000182247	UBE2E2	ubiquitin conjugating enzyme E2 E2 [Source:HGNC Symbol;Acc:HGNC:12478]	0.3131	0.000989	0.3165	0.005067	0.2788	0.0115
ENSG00000011260	UTP18	UTP18 small subunit processome component [Source:HGNC Symbol;Acc:HGNC:24274]	0.3131	0.001155	0.317	0.006555	0.2708	0.01123
ENSG00000008086	CDKL5	cyclin dependent kinase like 5 [Source:HGNC Symbol;Acc:HGNC:11411]	0.3129	0.03678	0.315	0.06561	0.2975	0.08417
ENSG00000198408	OGA	O-GlcNAcase [Source:HGNC Symbol;Acc:HGNC:7056]	0.3128	0.04055	0.3152	0.05094	0.3361	0.05553
ENSG00000131188	PRR7	proline rich 7, synaptic [Source:HGNC Symbol;Acc:HGNC:28130]	0.3125	0.1778	0.3163	0.1901	0.3806	0.161
ENSG00000140945	CDH13	cadherin 13 [Source:HGNC Symbol;Acc:HGNC:1753]	0.3125	0.4088	0.3106	0.4607	0.1621	0.7274
ENSG00000171453	POLR1C	RNA polymerase I and III subunit C [Source:HGNC Symbol;Acc:HGNC:20194]	0.3124	0.0538	0.3156	0.06595	0.2592	0.1275
ENSG00000088305	DNMT3B	DNA methyltransferase 3 beta [Source:HGNC Symbol;Acc:HGNC:2979]	0.3122	0.3492	0.3175	0.3897	0.3182	0.3961
ENSG00000164741	DLC1	DLC1 Rho GTPase activating protein [Source:HGNC Symbol;Acc:HGNC:2897]	0.3122	0.5029	0.3119	0.5319	-0.1133	0.8575
ENSG00000162642	C1orf52	chromosome 1 open reading frame 52 [Source:HGNC Symbol;Acc:HGNC:24871]	0.3121	0.04125	0.315	0.0506	0.2468	0.1118
ENSG00000270099		novel transcript	0.3121	0.1372	0.3147	0.151	0.1857	0.4626
ENSG00000008311	AASS	aminoadipate-semialdehyde synthase [Source:HGNC Symbol;Acc:HGNC:17366]	0.312	0.4281	0.3135	0.4536	0.1197	0.7867
ENSG00000127980	PEX1	peroxisomal biogenesis factor 1 [Source:HGNC Symbol;Acc:HGNC:8850]	0.312	0.006399	0.3175	0.0202	0.2369	0.07153
ENSG00000189164	ZNF527	zinc finger protein 527 [Source:HGNC Symbol;Acc:HGNC:29385]	0.3115	0.2827	0.3203	0.3338	0.2238	0.4408
ENSG00000185499	MUC1	mucin 1, cell surface associated [Source:HGNC Symbol;Acc:HGNC:7508]	0.3114	0.4923	0.3165	0.5058	0.2882	0.6122
ENSG00000169193	CCDC126	coiled-coil domain containing 126 [Source:HGNC Symbol;Acc:HGNC:22398]	0.3113	0.03705	0.3125	0.07254	0.3044	0.08462
ENSG00000178966	RMI1	RecQ mediated genome instability 1 [Source:HGNC Symbol;Acc:HGNC:25764]	0.3111	0.0442	0.3182	0.09349	0.266	0.1455
ENSG00000175054	ATR	ATR serine/threonine kinase [Source:HGNC Symbol;Acc:HGNC:882]	0.311	0.03809	0.3143	0.0463	0.2549	0.1007
ENSG00000114439	BBX	BBX high mobility group box domain containing [Source:HGNC Symbol;Acc:HGNC:14422]	0.3107	0.01396	0.3126	0.02513	0.3284	0.01251
ENSG00000146757	ZNF92	zinc finger protein 92 [Source:HGNC Symbol;Acc:HGNC:13168]	0.3104	0.09825	0.3123	0.1216	0.2397	0.2646
ENSG00000177989	ODF3B	outer dense fiber of sperm tails 3B [Source:HGNC Symbol;Acc:HGNC:34388]	0.31	0.2233	0.3115	0.2261	0.3375	0.1925
ENSG00000164506	STXBP5	syntaxin binding protein 5 [Source:HGNC Symbol;Acc:HGNC:19665]	0.3097	0.02024	0.3105	0.0304	0.2982	0.05382
ENSG00000197217	ENTPD4	ectonucleoside triphosphate diphosphohydrolase 4 [Source:HGNC Symbol;Acc:HGNC:14573]	0.3096	0.01863	0.3121	0.02784	0.306	0.02823
ENSG00000110429	FBXO3	F-box protein 3 [Source:HGNC Symbol;Acc:HGNC:13582]	0.3095	0.03969	0.3124	0.05414	0.2522	0.1056
ENSG00000123552	USP45	ubiquitin specific peptidase 45 [Source:HGNC Symbol;Acc:HGNC:20080]	0.3094	0.06542	0.3141	0.107	0.2424	0.2176
ENSG00000075539	FRYL	FRY like transcription coactivator [Source:HGNC Symbol;Acc:HGNC:29127]	0.3094	0.01721	0.3114	0.02628	0.309	0.02629
ENSG00000119778	ATAD2B	ATPase family AAA domain containing 2B [Source:HGNC Symbol;Acc:HGNC:29230]	0.3094	0.03273	0.3117	0.04401	0.2483	0.108
ENSG00000132823	OSER1	oxidative stress responsive serine rich 1 [Source:HGNC Symbol;Acc:HGNC:16105]	0.3094	0.05354	0.3113	0.06337	0.3003	0.1164
ENSG00000169087	HSPBAP1	HSPB1 associated protein 1 [Source:HGNC Symbol;Acc:HGNC:16389]	0.3094	0.1068	0.3117	0.1105	0.2531	0.1926
ENSG00000156232	WHAMM	WASP homolog associated with actin, golgi membranes and microtubules [Source:HGNC Symbol;Acc:HGNC:30493]	0.3091	0.001859	0.3118	0.007477	0.2855	0.01406
ENSG00000182504	CEP97	centrosomal protein 97 [Source:HGNC Symbol;Acc:HGNC:26244]	0.309	0.06633	0.3165	0.1061	0.2478	0.1765
ENSG00000173598	NUDT4	nudix hydrolase 4 [Source:HGNC Symbol;Acc:HGNC:8051]	0.3089	0.0226	0.3116	0.04139	0.2773	0.06395
ENSG00000105851	PIK3CG	phosphatidylinositol-4,5-bisphosphate 3-kinase catalytic subunit gamma [Source:HGNC Symbol;Acc:HGNC:8978]	0.3089	0.04566	0.3116	0.05523	0.3688	0.03126
ENSG00000185420	SMYD3	SET and MYND domain containing 3 [Source:HGNC Symbol;Acc:HGNC:15513]	0.3087	0.0284	0.3103	0.06131	0.3044	0.05904
ENSG00000125945	ZNF436	zinc finger protein 436 [Source:HGNC Symbol;Acc:HGNC:20814]	0.3085	0.1712	0.3096	0.1996	0.3554	0.1996
ENSG00000155906	RMND1	required for meiotic nuclear division 1 homolog [Source:HGNC Symbol;Acc:HGNC:21176]	0.3084	0.02882	0.3134	0.05332	0.2556	0.09765
ENSG00000114742	WDR48	WD repeat domain 48 [Source:HGNC Symbol;Acc:HGNC:30914]	0.3083	0.0374	0.3125	0.0483	0.2787	0.06484
ENSG00000137055	PLAA	phospholipase A2 activating protein [Source:HGNC Symbol;Acc:HGNC:9043]	0.308	0.02179	0.3099	0.03384	0.2791	0.05343
ENSG00000156304	SCAF4	SR-related CTD associated factor 4 [Source:HGNC Symbol;Acc:HGNC:19304]	0.3079	0.04429	0.311	0.05366	0.2728	0.08402
ENSG00000152422	XRCC4	X-ray repair cross complementing 4 [Source:HGNC Symbol;Acc:HGNC:12831]	0.3079	0.09857	0.3097	0.1283	0.3191	0.1269
ENSG00000041515	MYO16	myosin XVI [Source:HGNC Symbol;Acc:HGNC:29822]	0.3078	0.6118	0.3042	0.6467	-0.03075	0.9655
ENSG00000120280	CXorf21	chromosome X open reading frame 21 [Source:HGNC Symbol;Acc:HGNC:25667]	0.3078	0.007516	0.3096	0.02609	0.2721	0.0572
ENSG00000135315	CEP162	centrosomal protein 162 [Source:HGNC Symbol;Acc:HGNC:21107]	0.3078	0.03903	0.3112	0.06802	0.2334	0.1816
ENSG00000136319	TTC5	tetratricopeptide repeat domain 5 [Source:HGNC Symbol;Acc:HGNC:19274]	0.3078	0.04959	0.3082	0.08027	0.2999	0.09462
ENSG00000103044	HAS3	hyaluronan synthase 3 [Source:HGNC Symbol;Acc:HGNC:4820]	0.3075	0.1893	0.3082	0.2407	0.323	0.2173
ENSG00000100490	CDKL1	cyclin dependent kinase like 1 [Source:HGNC Symbol;Acc:HGNC:1781]	0.3072	0.1656	0.3133	0.2183	0.2319	0.3731
ENSG00000110172	CHORDC1	cysteine and histidine rich domain containing 1 [Source:HGNC Symbol;Acc:HGNC:14525]	0.3069	0.1027	0.3096	0.119	0.2734	0.1608
ENSG00000111144	LTA4H	leukotriene A4 hydrolase [Source:HGNC Symbol;Acc:HGNC:6710]	0.3068	0.1439	0.3041	0.161	0.3937	0.07914
ENSG00000137601	NEK1	NIMA related kinase 1 [Source:HGNC Symbol;Acc:HGNC:7744]	0.3068	0.05763	0.3094	0.0913	0.2982	0.09225
ENSG00000113360	DROSHA	drosha ribonuclease III [Source:HGNC Symbol;Acc:HGNC:17904]	0.3066	0.0001434	0.3096	0.004171	0.2709	0.008087
ENSG00000006459	KDM7A	lysine demethylase 7A [Source:HGNC Symbol;Acc:HGNC:22224]	0.3066	0.003408	0.3081	0.0111	0.344	0.01064
ENSG00000254206	NPIPB11	nuclear pore complex interacting protein family member B11 [Source:HGNC Symbol;Acc:HGNC:37453]	0.3066	0.2544	0.3122	0.2655	0.1967	0.581
ENSG00000070501	POLB	DNA polymerase beta [Source:HGNC Symbol;Acc:HGNC:9174]	0.3065	0.005627	0.3089	0.01995	0.2715	0.03758
ENSG00000273136	NBPF26	NBPF member 26 [Source:HGNC Symbol;Acc:HGNC:49571]	0.3064	0.5694	0.3069	0.5382	0.00699	0.9917
ENSG00000158373	H2BC5	H2B clustered histone 5 [Source:HGNC Symbol;Acc:HGNC:4747]	0.3063	0.3433	0.3088	0.4028	0.2524	0.4755
ENSG00000137449	CPEB2	cytoplasmic polyadenylation element binding protein 2 [Source:HGNC Symbol;Acc:HGNC:21745]	0.3061	0.08281	0.3077	0.09307	0.2924	0.1097
ENSG00000047188	YTHDC2	YTH domain containing 2 [Source:HGNC Symbol;Acc:HGNC:24721]	0.306	0.07894	0.3081	0.08538	0.2494	0.1503
ENSG00000177058	SLC38A9	solute carrier family 38 member 9 [Source:HGNC Symbol;Acc:HGNC:26907]	0.3059	0.06713	0.3098	0.09435	0.2575	0.1499
ENSG00000189190	ZNF600	zinc finger protein 600 [Source:HGNC Symbol;Acc:HGNC:30951]	0.3052	0.2194	0.3099	0.2385	0.1962	0.4937
ENSG00000149187	CELF1	CUGBP Elav-like family member 1 [Source:HGNC Symbol;Acc:HGNC:2549]	0.305	0.05407	0.3088	0.06633	0.3221	0.07822
ENSG00000182326	C1S	complement C1s [Source:HGNC Symbol;Acc:HGNC:1247]	0.3048	0.2699	0.3074	0.3127	0.2079	0.5498
ENSG00000153914	SREK1	splicing regulatory glutamic acid and lysine rich protein 1 [Source:HGNC Symbol;Acc:HGNC:17882]	0.3047	0.07882	0.3077	0.08779	0.3016	0.1055
ENSG00000178105	DDX10	DEAD-box helicase 10 [Source:HGNC Symbol;Acc:HGNC:2735]	0.3045	0.1448	0.3073	0.1644	0.2801	0.2007
ENSG00000197568	HHLA3	HERV-H LTR-associating 3 [Source:HGNC Symbol;Acc:HGNC:4906]	0.3044	0.462	0.3044	0.5117	0.286	0.5961
ENSG00000138433	CIR1	corepressor interacting with RBPJ, 1 [Source:HGNC Symbol;Acc:HGNC:24217]	0.3043	0.02088	0.3067	0.02958	0.3004	0.04745
ENSG00000196151	WDSUB1	WD repeat, sterile alpha motif and U-box domain containing 1 [Source:HGNC Symbol;Acc:HGNC:26697]	0.3043	0.0848	0.3075	0.1016	0.2328	0.2494
ENSG00000186814	ZSCAN30	zinc finger and SCAN domain containing 30 [Source:HGNC Symbol;Acc:HGNC:33517]	0.3041	0.3704	0.2977	0.4444	0.3447	0.3641
ENSG00000117010	ZNF684	zinc finger protein 684 [Source:HGNC Symbol;Acc:HGNC:28418]	0.304	0.1885	0.3044	0.2163	0.3597	0.1742
ENSG00000137500	CCDC90B	coiled-coil domain containing 90B [Source:HGNC Symbol;Acc:HGNC:28108]	0.304	0.002728	0.3033	0.02193	0.2876	0.02025
ENSG00000198019	FCGR1B	Fc fragment of IgG receptor Ib [Source:HGNC Symbol;Acc:HGNC:3614]	0.304	0.4985	0.3015	0.4719	0.03371	0.9531
ENSG00000095564	BTAF1	B-TFIID TATA-box binding protein associated factor 1 [Source:HGNC Symbol;Acc:HGNC:17307]	0.3036	0.07481	0.306	0.08538	0.3072	0.1065
ENSG00000105559	PLEKHA4	pleckstrin homology domain containing A4 [Source:HGNC Symbol;Acc:HGNC:14339]	0.3033	0.4795	0.3024	0.5349	0.4887	0.2646
ENSG00000152926	ZNF117	zinc finger protein 117 [Source:HGNC Symbol;Acc:HGNC:12897]	0.3033	0.1696	0.3069	0.1851	0.2256	0.3543
ENSG00000168566	SNRNP48	small nuclear ribonucleoprotein U11/U12 subunit 48 [Source:HGNC Symbol;Acc:HGNC:21368]	0.3032	0.03066	0.3047	0.05883	0.285	0.06783
ENSG00000144645	OSBPL10	oxysterol binding protein like 10 [Source:HGNC Symbol;Acc:HGNC:16395]	0.3031	0.334	0.3061	0.3649	0.2152	0.5871
ENSG00000010072	SPRTN	SprT-like N-terminal domain [Source:HGNC Symbol;Acc:HGNC:25356]	0.303	0.0337	0.3051	0.06273	0.3122	0.05613
ENSG00000070190	DAPP1	dual adaptor of phosphotyrosine and 3-phosphoinositides 1 [Source:HGNC Symbol;Acc:HGNC:16500]	0.3027	0.008823	0.3045	0.0179	0.2872	0.03006
ENSG00000032219	ARID4A	AT-rich interaction domain 4A [Source:HGNC Symbol;Acc:HGNC:9885]	0.3026	0.03938	0.3047	0.0506	0.2737	0.1021
ENSG00000082515	MRPL22	mitochondrial ribosomal protein L22 [Source:HGNC Symbol;Acc:HGNC:14480]	0.3025	0.03786	0.3055	0.05804	0.2862	0.07943
ENSG00000171094	ALK	ALK receptor tyrosine kinase [Source:HGNC Symbol;Acc:HGNC:427]	0.3024	0.5482	0.3071	0.5649	0.03585	0.9596
ENSG00000149231	CCDC82	coiled-coil domain containing 82 [Source:HGNC Symbol;Acc:HGNC:26282]	0.3021	0.151	0.3051	0.1669	0.2726	0.2296
ENSG00000160352	ZNF714	zinc finger protein 714 [Source:HGNC Symbol;Acc:HGNC:27124]	0.302	0.1354	0.3048	0.1628	0.2361	0.327
ENSG00000122958	VPS26A	VPS26, retromer complex component A [Source:HGNC Symbol;Acc:HGNC:12711]	0.3019	0.05077	0.3039	0.06166	0.2489	0.1292
ENSG00000152818	UTRN	utrophin [Source:HGNC Symbol;Acc:HGNC:12635]	0.3018	0.02572	0.3039	0.03511	0.368	0.02246
ENSG00000196597	ZNF782	zinc finger protein 782 [Source:HGNC Symbol;Acc:HGNC:33110]	0.3013	0.05708	0.3046	0.1	0.2654	0.1246
ENSG00000113163	CERT1	ceramide transporter 1 [Source:HGNC Symbol;Acc:HGNC:2205]	0.3012	0.002692	0.3025	0.008899	0.2998	0.006828
ENSG00000143669	LYST	lysosomal trafficking regulator [Source:HGNC Symbol;Acc:HGNC:1968]	0.3012	0.003266	0.3021	0.01076	0.3837	0.006828
ENSG00000155530	LRGUK	leucine rich repeats and guanylate kinase domain containing [Source:HGNC Symbol;Acc:HGNC:21964]	0.3012	0.5673	0.3074	0.5728	-0.4045	0.6417
ENSG00000111961	SASH1	SAM and SH3 domain containing 1 [Source:HGNC Symbol;Acc:HGNC:19182]	0.301	0.3538	0.3073	0.3524	0.1144	0.8048
ENSG00000169570	DTWD2	DTW domain containing 2 [Source:HGNC Symbol;Acc:HGNC:19334]	0.3009	0.2979	0.2974	0.3047	-0.0592	0.8361
ENSG00000258643	BCL2L2-PABPN1	BCL2L2-PABPN1 readthrough [Source:HGNC Symbol;Acc:HGNC:42959]	0.3009	0.1699	0.305	0.1874	0.2008	0.4409
ENSG00000076604	TRAF4	TNF receptor associated factor 4 [Source:HGNC Symbol;Acc:HGNC:12034]	0.3003	0.2475	0.303	0.2624	0.3961	0.1787
ENSG00000148429	USP6NL	USP6 N-terminal like [Source:HGNC Symbol;Acc:HGNC:16858]	0.3003	0.03147	0.3036	0.04559	0.261	0.09328
ENSG00000157107	FCHO2	FCH and mu domain containing endocytic adaptor 2 [Source:HGNC Symbol;Acc:HGNC:25180]	0.3003	0.1231	0.3018	0.1337	0.2452	0.2492
ENSG00000188234	AGAP4	ArfGAP with GTPase domain, ankyrin repeat and PH domain 4 [Source:HGNC Symbol;Acc:HGNC:23459]	0.3003	0.1773	0.305	0.1874	0.1386	0.6062
ENSG00000023287	RB1CC1	RB1 inducible coiled-coil 1 [Source:HGNC Symbol;Acc:HGNC:15574]	0.3001	0.02745	0.3021	0.03751	0.2927	0.0453
ENSG00000162924	REL	REL proto-oncogene, NF-kB subunit [Source:HGNC Symbol;Acc:HGNC:9954]	0.3	0.171	0.3038	0.1752	0.318	0.1804
ENSG00000114209	PDCD10	programmed cell death 10 [Source:HGNC Symbol;Acc:HGNC:8761]	0.2999	0.0152	0.3021	0.03247	0.2643	0.04745
ENSG00000163251	FZD5	frizzled class receptor 5 [Source:HGNC Symbol;Acc:HGNC:4043]	0.2998	0.2796	0.302	0.3036	0.3354	0.3223
ENSG00000213918	DNASE1	deoxyribonuclease 1 [Source:HGNC Symbol;Acc:HGNC:2956]	0.2997	0.2913	0.2997	0.34	0.4189	0.1855
ENSG00000126804	ZBTB1	zinc finger and BTB domain containing 1 [Source:HGNC Symbol;Acc:HGNC:20259]	0.2992	0.1162	0.3012	0.127	0.3296	0.1087
ENSG00000120458	MSANTD2	Myb/SANT DNA binding domain containing 2 [Source:HGNC Symbol;Acc:HGNC:26266]	0.2988	0.1192	0.3024	0.139	0.2607	0.2129
ENSG00000117500	TMED5	transmembrane p24 trafficking protein 5 [Source:HGNC Symbol;Acc:HGNC:24251]	0.2986	0.1287	0.3	0.1357	0.2671	0.1919
ENSG00000156787	TBC1D31	TBC1 domain family member 31 [Source:HGNC Symbol;Acc:HGNC:30888]	0.2986	0.08781	0.3039	0.1245	0.2344	0.2137
ENSG00000040341	STAU2	staufen double-stranded RNA binding protein 2 [Source:HGNC Symbol;Acc:HGNC:11371]	0.2985	0.01634	0.2992	0.04265	0.2953	0.03087
ENSG00000111846	GCNT2	glucosaminyl (N-acetyl) transferase 2 (I blood group) [Source:HGNC Symbol;Acc:HGNC:4204]	0.2984	0.1474	0.2997	0.1764	0.3487	0.1293
ENSG00000197272	IL27	interleukin 27 [Source:HGNC Symbol;Acc:HGNC:19157]	0.2984	0.3462	0.2996	0.3569	0.3407	0.3767
ENSG00000076513	ANKRD13A	ankyrin repeat domain 13A [Source:HGNC Symbol;Acc:HGNC:21268]	0.2983	0.004401	0.3005	0.01189	0.2894	0.01243
ENSG00000256087	ZNF432	zinc finger protein 432 [Source:HGNC Symbol;Acc:HGNC:20810]	0.2983	0.1126	0.3031	0.1357	0.2124	0.2991
ENSG00000175104	TRAF6	TNF receptor associated factor 6 [Source:HGNC Symbol;Acc:HGNC:12036]	0.2982	0.03741	0.3005	0.0502	0.2971	0.0563
ENSG00000136682	CBWD2	COBW domain containing 2 [Source:HGNC Symbol;Acc:HGNC:17907]	0.2982	0.06582	0.3002	0.07691	0.1838	0.303
ENSG00000143257	NR1I3	nuclear receptor subfamily 1 group I member 3 [Source:HGNC Symbol;Acc:HGNC:7969]	0.2982	0.2718	0.3045	0.299	0.1556	0.6164
ENSG00000088448	ANKRD10	ankyrin repeat domain 10 [Source:HGNC Symbol;Acc:HGNC:20265]	0.2979	0.07794	0.3	0.09169	0.3326	0.07042
ENSG00000145494	NDUFS6	NADH:ubiquinone oxidoreductase subunit S6 [Source:HGNC Symbol;Acc:HGNC:7713]	0.2979	0.04452	0.3009	0.05483	0.2914	0.06509
ENSG00000163219	ARHGAP25	Rho GTPase activating protein 25 [Source:HGNC Symbol;Acc:HGNC:28951]	0.2978	0.007112	0.2999	0.01758	0.312	0.01397
ENSG00000118418	HMGN3	high mobility group nucleosomal binding domain 3 [Source:HGNC Symbol;Acc:HGNC:12312]	0.2978	0.02082	0.3009	0.03243	0.286	0.05309
ENSG00000064933	PMS1	PMS1 homolog 1, mismatch repair system component [Source:HGNC Symbol;Acc:HGNC:9121]	0.2977	0.04311	0.2984	0.08149	0.2938	0.08165
ENSG00000132664	POLR3F	RNA polymerase III subunit F [Source:HGNC Symbol;Acc:HGNC:15763]	0.2977	0.1281	0.3	0.1488	0.3128	0.1686
ENSG00000189127	ANKRD34B	ankyrin repeat domain 34B [Source:HGNC Symbol;Acc:HGNC:33736]	0.2977	0.5656	0.295	0.5802	0.7956	0.1789
ENSG00000198157	HMGN5	high mobility group nucleosome binding domain 5 [Source:HGNC Symbol;Acc:HGNC:8013]	0.2977	0.1959	0.2974	0.271	0.3561	0.1774
ENSG00000138459	SLC35A5	solute carrier family 35 member A5 [Source:HGNC Symbol;Acc:HGNC:20792]	0.2976	0.05708	0.2975	0.08962	0.2904	0.1048
ENSG00000075391	RASAL2	RAS protein activator like 2 [Source:HGNC Symbol;Acc:HGNC:9874]	0.2975	0.5411	0.2912	0.5296	0.04652	0.952
ENSG00000107614	TRDMT1	tRNA aspartic acid methyltransferase 1 [Source:HGNC Symbol;Acc:HGNC:2977]	0.2973	0.1337	0.3007	0.1583	0.1976	0.4236
ENSG00000162438	CTRC	chymotrypsin C [Source:HGNC Symbol;Acc:HGNC:2523]	0.2973	0.2407	0.2998	0.2864	0.3319	0.2335
ENSG00000144036	EXOC6B	exocyst complex component 6B [Source:HGNC Symbol;Acc:HGNC:17085]	0.2972	0.0337	0.3014	0.05938	0.2375	0.1281
ENSG00000121741	ZMYM2	zinc finger MYM-type containing 2 [Source:HGNC Symbol;Acc:HGNC:12989]	0.2966	0.03056	0.2978	0.03964	0.2851	0.05881
ENSG00000169239	CA5B	carbonic anhydrase 5B [Source:HGNC Symbol;Acc:HGNC:1378]	0.2966	0.09403	0.2994	0.1014	0.2889	0.1134
ENSG00000120278	PLEKHG1	pleckstrin homology and RhoGEF domain containing G1 [Source:HGNC Symbol;Acc:HGNC:20884]	0.2965	0.4821	0.2977	0.5163	0.2919	0.5554
ENSG00000198964	SGMS1	sphingomyelin synthase 1 [Source:HGNC Symbol;Acc:HGNC:29799]	0.2964	0.08626	0.2978	0.09894	0.3147	0.08992
ENSG00000083635	NUFIP1	nuclear FMR1 interacting protein 1 [Source:HGNC Symbol;Acc:HGNC:8057]	0.296	0.08887	0.2992	0.1279	0.3185	0.1029
ENSG00000110492	MDK	midkine [Source:HGNC Symbol;Acc:HGNC:6972]	0.296	0.3717	0.2947	0.4157	0.2587	0.5113
ENSG00000148426	PROSER2	proline and serine rich 2 [Source:HGNC Symbol;Acc:HGNC:23728]	0.2958	0.2727	0.2975	0.2964	0.3887	0.2094
ENSG00000125703	ATG4C	autophagy related 4C cysteine peptidase [Source:HGNC Symbol;Acc:HGNC:16040]	0.2957	0.1187	0.2976	0.1457	0.2563	0.2128
ENSG00000128918	ALDH1A2	aldehyde dehydrogenase 1 family member A2 [Source:HGNC Symbol;Acc:HGNC:15472]	0.2957	0.2075	0.295	0.2375	0.2158	0.4591
ENSG00000171612	SLC25A33	solute carrier family 25 member 33 [Source:HGNC Symbol;Acc:HGNC:29681]	0.2957	0.3074	0.2995	0.3084	0.3366	0.2897
ENSG00000132485	ZRANB2	zinc finger RANBP2-type containing 2 [Source:HGNC Symbol;Acc:HGNC:13058]	0.2955	0.01962	0.298	0.02932	0.2556	0.05572
ENSG00000167216	KATNAL2	katanin catalytic subunit A1 like 2 [Source:HGNC Symbol;Acc:HGNC:25387]	0.2955	0.2038	0.2997	0.2316	0.2801	0.2435
ENSG00000171055	FEZ2	fasciculation and elongation protein zeta 2 [Source:HGNC Symbol;Acc:HGNC:3660]	0.2954	0.008472	0.2969	0.02513	0.2858	0.02608
ENSG00000148634	HERC4	HECT and RLD domain containing E3 ubiquitin protein ligase 4 [Source:HGNC Symbol;Acc:HGNC:24521]	0.2952	0.01045	0.2976	0.02279	0.2341	0.06924
ENSG00000113108	APBB3	amyloid beta precursor protein binding family B member 3 [Source:HGNC Symbol;Acc:HGNC:20708]	0.2951	0.09234	0.2976	0.1014	0.3137	0.0917
ENSG00000164305	CASP3	caspase 3 [Source:HGNC Symbol;Acc:HGNC:1504]	0.295	0.02354	0.2963	0.04861	0.2718	0.07583
ENSG00000135049	AGTPBP1	ATP/GTP binding protein 1 [Source:HGNC Symbol;Acc:HGNC:17258]	0.295	0.03273	0.2966	0.04673	0.3231	0.05043
ENSG00000267699		novel protein	0.295	0.177	0.3088	0.2328	0.1829	0.508
ENSG00000155008	APOOL	apolipoprotein O like [Source:HGNC Symbol;Acc:HGNC:24009]	0.2948	0.1004	0.2983	0.1301	0.2531	0.2049
ENSG00000082068	WDR70	WD repeat domain 70 [Source:HGNC Symbol;Acc:HGNC:25495]	0.2947	0.02082	0.2979	0.03186	0.254	0.0526
ENSG00000196466	ZNF799	zinc finger protein 799 [Source:HGNC Symbol;Acc:HGNC:28071]	0.2944	0.1972	0.2965	0.2481	0.2608	0.3432
ENSG00000115232	ITGA4	integrin subunit alpha 4 [Source:HGNC Symbol;Acc:HGNC:6140]	0.2943	0.05925	0.2962	0.0748	0.342	0.06048
ENSG00000111666	CHPT1	choline phosphotransferase 1 [Source:HGNC Symbol;Acc:HGNC:17852]	0.2942	0.03585	0.2943	0.04822	0.2776	0.09446
ENSG00000101935	AMMECR1	AMMECR nuclear protein 1 [Source:HGNC Symbol;Acc:HGNC:467]	0.2941	0.009517	0.2981	0.03531	0.2479	0.05572
ENSG00000196776	CD47	CD47 molecule [Source:HGNC Symbol;Acc:HGNC:1682]	0.2941	0.01636	0.2954	0.02756	0.2841	0.03237
ENSG00000095951	HIVEP1	HIVEP zinc finger 1 [Source:HGNC Symbol;Acc:HGNC:4920]	0.2941	0.03537	0.2969	0.04499	0.2654	0.07446
ENSG00000198898	CAPZA2	capping actin protein of muscle Z-line subunit alpha 2 [Source:HGNC Symbol;Acc:HGNC:1490]	0.2941	0.07777	0.296	0.09139	0.2722	0.1275
ENSG00000156172	C8orf37	chromosome 8 open reading frame 37 [Source:HGNC Symbol;Acc:HGNC:27232]	0.2938	0.3781	0.2983	0.424	0.1612	0.6961
ENSG00000048405	ZNF800	zinc finger protein 800 [Source:HGNC Symbol;Acc:HGNC:27267]	0.2933	0.05376	0.2961	0.06523	0.2816	0.08106
ENSG00000112200	ZNF451	zinc finger protein 451 [Source:HGNC Symbol;Acc:HGNC:21091]	0.2933	0.04369	0.2954	0.05526	0.2746	0.0697
ENSG00000151576	QTRT2	queuine tRNA-ribosyltransferase accessory subunit 2 [Source:HGNC Symbol;Acc:HGNC:25771]	0.2925	0.03183	0.2956	0.04497	0.2749	0.05248
ENSG00000187583	PLEKHN1	pleckstrin homology domain containing N1 [Source:HGNC Symbol;Acc:HGNC:25284]	0.2925	0.3853	0.294	0.4223	0.5741	0.1292
ENSG00000116754	SRSF11	serine and arginine rich splicing factor 11 [Source:HGNC Symbol;Acc:HGNC:10782]	0.2924	0.07333	0.2946	0.08515	0.3082	0.0976
ENSG00000164187	LMBRD2	LMBR1 domain containing 2 [Source:HGNC Symbol;Acc:HGNC:25287]	0.2924	0.03522	0.2948	0.06523	0.2182	0.1553
ENSG00000186648	CARMIL3	capping protein regulator and myosin 1 linker 3 [Source:HGNC Symbol;Acc:HGNC:20272]	0.2924	0.3889	0.2925	0.4337	0.3219	0.4014
ENSG00000121879	PIK3CA	phosphatidylinositol-4,5-bisphosphate 3-kinase catalytic subunit alpha [Source:HGNC Symbol;Acc:HGNC:8975]	0.2921	0.08477	0.2946	0.09897	0.22	0.2322
ENSG00000115414	FN1	fibronectin 1 [Source:HGNC Symbol;Acc:HGNC:3778]	0.292	0.6992	0.2934	0.6877	-0.2155	0.8448
ENSG00000054267	ARID4B	AT-rich interaction domain 4B [Source:HGNC Symbol;Acc:HGNC:15550]	0.2916	0.01045	0.2939	0.02026	0.2692	0.02823
ENSG00000184545	DUSP8	dual specificity phosphatase 8 [Source:HGNC Symbol;Acc:HGNC:3074]	0.2916	0.6433	0.3007	0.6377	0.004246	0.9963
ENSG00000197959	DNM3	dynamin 3 [Source:HGNC Symbol;Acc:HGNC:29125]	0.2915	0.2115	0.2963	0.2914	0.1665	0.5609
ENSG00000111364	DDX55	DEAD-box helicase 55 [Source:HGNC Symbol;Acc:HGNC:20085]	0.2911	0.08327	0.2944	0.1047	0.2656	0.1569
ENSG00000185049	NELFA	negative elongation factor complex member A [Source:HGNC Symbol;Acc:HGNC:12768]	0.2911	0.01542	0.2935	0.03231	0.2523	0.08142
ENSG00000100883	SRP54	signal recognition particle 54 [Source:HGNC Symbol;Acc:HGNC:11301]	0.291	0.05392	0.2928	0.06523	0.1919	0.2147
ENSG00000006652	IFRD1	interferon related developmental regulator 1 [Source:HGNC Symbol;Acc:HGNC:5456]	0.2907	0.1475	0.2913	0.1551	0.2491	0.2335
ENSG00000147050	KDM6A	lysine demethylase 6A [Source:HGNC Symbol;Acc:HGNC:12637]	0.2904	0.09172	0.2912	0.09922	0.3078	0.07803
ENSG00000204099	NEU4	neuraminidase 4 [Source:HGNC Symbol;Acc:HGNC:21328]	0.2903	0.7199	0.2899	0.7408	-0.05689	0.9578
ENSG00000092421	SEMA6A	semaphorin 6A [Source:HGNC Symbol;Acc:HGNC:10738]	0.2901	0.1077	0.2931	0.1351	0.2634	0.1927
ENSG00000164338	UTP15	UTP15 small subunit processome component [Source:HGNC Symbol;Acc:HGNC:25758]	0.29	0.1265	0.293	0.1486	0.2262	0.2919
ENSG00000175198	PCCA	propionyl-CoA carboxylase subunit alpha [Source:HGNC Symbol;Acc:HGNC:8653]	0.2899	0.04441	0.2923	0.06859	0.2854	0.07121
ENSG00000110944	IL23A	interleukin 23 subunit alpha [Source:HGNC Symbol;Acc:HGNC:15488]	0.2898	0.204	0.2935	0.2181	0.2178	0.435
ENSG00000122477	LRRC39	leucine rich repeat containing 39 [Source:HGNC Symbol;Acc:HGNC:28228]	0.2897	0.09418	0.295	0.1458	0.2143	0.2953
ENSG00000051180	RAD51	RAD51 recombinase [Source:HGNC Symbol;Acc:HGNC:9817]	0.2894	0.2533	0.293	0.3321	0.1944	0.5065
ENSG00000181722	ZBTB20	zinc finger and BTB domain containing 20 [Source:HGNC Symbol;Acc:HGNC:13503]	0.2892	0.08408	0.2921	0.09834	0.215	0.2171
ENSG00000159082	SYNJ1	synaptojanin 1 [Source:HGNC Symbol;Acc:HGNC:11503]	0.2891	0.1049	0.291	0.1136	0.2566	0.1569
ENSG00000044459	CNTLN	centlein [Source:HGNC Symbol;Acc:HGNC:23432]	0.289	0.034	0.2915	0.05636	0.2433	0.1049
ENSG00000168036	CTNNB1	catenin beta 1 [Source:HGNC Symbol;Acc:HGNC:2514]	0.2889	0.321	0.2937	0.3226	0.3408	0.3157
ENSG00000113318	MSH3	mutS homolog 3 [Source:HGNC Symbol;Acc:HGNC:7326]	0.2887	0.07062	0.2909	0.1026	0.2826	0.1115
ENSG00000010818	HIVEP2	HIVEP zinc finger 2 [Source:HGNC Symbol;Acc:HGNC:4921]	0.2883	0.1167	0.2872	0.1299	0.1802	0.3911
ENSG00000116731	PRDM2	PR/SET domain 2 [Source:HGNC Symbol;Acc:HGNC:9347]	0.2882	0.07857	0.2913	0.09291	0.2989	0.09141
ENSG00000053900	ANAPC4	anaphase promoting complex subunit 4 [Source:HGNC Symbol;Acc:HGNC:19990]	0.2881	0.03267	0.2894	0.04549	0.2118	0.1142
ENSG00000152133	GPATCH11	G-patch domain containing 11 [Source:HGNC Symbol;Acc:HGNC:26768]	0.2879	0.08282	0.2907	0.1097	0.2691	0.1464
ENSG00000065911	MTHFD2	methylenetetrahydrofolate dehydrogenase (NADP+ dependent) 2, methenyltetrahydrofolate cyclohydrolase [Source:HGNC Symbol;Acc:HGNC:7434]	0.2878	0.0966	0.2893	0.1167	0.2894	0.1428
ENSG00000080823	MOK	MOK protein kinase [Source:HGNC Symbol;Acc:HGNC:9833]	0.2878	0.3234	0.2884	0.3968	0.4365	0.102
ENSG00000196778	OR52K1	olfactory receptor family 52 subfamily K member 1 [Source:HGNC Symbol;Acc:HGNC:15222]	0.2878	0.4466	0.2888	0.4642	0.3933	0.365
ENSG00000203797	DDO	D-aspartate oxidase [Source:HGNC Symbol;Acc:HGNC:2727]	0.2878	0.3345	0.2889	0.3521	0.2914	0.4321
ENSG00000272896		novel protein	0.2878	0.1762	0.2807	0.2727	0.2788	0.3302
ENSG00000196605	ZNF846	zinc finger protein 846 [Source:HGNC Symbol;Acc:HGNC:27260]	0.2876	0.03033	0.2911	0.06567	0.2661	0.0697
ENSG00000130935	NOL11	nucleolar protein 11 [Source:HGNC Symbol;Acc:HGNC:24557]	0.2875	0.06172	0.2898	0.08829	0.2568	0.1309
ENSG00000106477	CEP41	centrosomal protein 41 [Source:HGNC Symbol;Acc:HGNC:12370]	0.2874	0.1322	0.2702	0.2712	0.3014	0.1612
ENSG00000119787	ATL2	atlastin GTPase 2 [Source:HGNC Symbol;Acc:HGNC:24047]	0.2874	0.1857	0.2904	0.1883	0.2376	0.306
ENSG00000088970	KIZ	kizuna centrosomal protein [Source:HGNC Symbol;Acc:HGNC:15865]	0.2874	0.004113	0.2906	0.01767	0.2471	0.03619
ENSG00000107745	MICU1	mitochondrial calcium uptake 1 [Source:HGNC Symbol;Acc:HGNC:1530]	0.2874	0.03183	0.2872	0.04319	0.2776	0.04984
ENSG00000182621	PLCB1	phospholipase C beta 1 [Source:HGNC Symbol;Acc:HGNC:15917]	0.2874	0.2536	0.2897	0.2561	0.2586	0.3859
ENSG00000115145	STAM2	signal transducing adaptor molecule 2 [Source:HGNC Symbol;Acc:HGNC:11358]	0.2873	0.04272	0.2902	0.06099	0.1959	0.2102
ENSG00000134574	DDB2	damage specific DNA binding protein 2 [Source:HGNC Symbol;Acc:HGNC:2718]	0.2873	0.09241	0.2866	0.1071	0.2732	0.1677
ENSG00000088179	PTPN4	protein tyrosine phosphatase non-receptor type 4 [Source:HGNC Symbol;Acc:HGNC:9656]	0.2872	0.1286	0.2891	0.1521	0.2008	0.3583
ENSG00000101557	USP14	ubiquitin specific peptidase 14 [Source:HGNC Symbol;Acc:HGNC:12612]	0.2872	0.1995	0.2897	0.207	0.2143	0.372
ENSG00000151893	CACUL1	CDK2 associated cullin domain 1 [Source:HGNC Symbol;Acc:HGNC:23727]	0.2872	0.008636	0.2886	0.01891	0.2934	0.01896
ENSG00000136560	TANK	TRAF family member associated NFKB activator [Source:HGNC Symbol;Acc:HGNC:11562]	0.2872	0.04903	0.2894	0.06287	0.3066	0.05342
ENSG00000180233	ZNRF2	zinc and ring finger 2 [Source:HGNC Symbol;Acc:HGNC:22316]	0.2872	0.09082	0.2897	0.1097	0.2799	0.1424
ENSG00000163428	LRRC58	leucine rich repeat containing 58 [Source:HGNC Symbol;Acc:HGNC:26968]	0.287	0.01519	0.2896	0.03483	0.2298	0.07275
ENSG00000064989	CALCRL	calcitonin receptor like receptor [Source:HGNC Symbol;Acc:HGNC:16709]	0.2864	0.3744	0.289	0.3812	0.2162	0.5799
ENSG00000100281	HMGXB4	HMG-box containing 4 [Source:HGNC Symbol;Acc:HGNC:5003]	0.2864	0.06202	0.2892	0.07389	0.2738	0.08746
ENSG00000004809	SLC22A16	solute carrier family 22 member 16 [Source:HGNC Symbol;Acc:HGNC:20302]	0.2863	0.3797	0.2883	0.3984	0.1794	0.6625
ENSG00000030066	NUP160	nucleoporin 160 [Source:HGNC Symbol;Acc:HGNC:18017]	0.2863	0.05294	0.2894	0.07556	0.2383	0.1249
ENSG00000109756	RAPGEF2	Rap guanine nucleotide exchange factor 2 [Source:HGNC Symbol;Acc:HGNC:16854]	0.286	0.03881	0.2883	0.05332	0.3144	0.03321
ENSG00000122970	IFT81	intraflagellar transport 81 [Source:HGNC Symbol;Acc:HGNC:14313]	0.2859	0.1919	0.2799	0.3101	0.2685	0.2777
ENSG00000145476	CYP4V2	cytochrome P450 family 4 subfamily V member 2 [Source:HGNC Symbol;Acc:HGNC:23198]	0.2859	0.2265	0.2884	0.2462	0.227	0.4265
ENSG00000173542	MOB1B	MOB kinase activator 1B [Source:HGNC Symbol;Acc:HGNC:29801]	0.2859	0.06725	0.2879	0.08294	0.2423	0.1371
ENSG00000114796	KLHL24	kelch like family member 24 [Source:HGNC Symbol;Acc:HGNC:25947]	0.2858	0.07418	0.2874	0.08341	0.2478	0.1928
ENSG00000060749	QSER1	glutamine and serine rich 1 [Source:HGNC Symbol;Acc:HGNC:26154]	0.2858	0.02597	0.289	0.04103	0.1904	0.1551
ENSG00000183844	FAM3B	family with sequence similarity 3 member B [Source:HGNC Symbol;Acc:HGNC:1253]	0.2858	0.8267	0.2752	0.8558	0.1731	0.8971
ENSG00000113593	PPWD1	peptidylprolyl isomerase domain and WD repeat containing 1 [Source:HGNC Symbol;Acc:HGNC:28954]	0.2857	0.1132	0.2879	0.1199	0.2299	0.2129
ENSG00000134824	FADS2	fatty acid desaturase 2 [Source:HGNC Symbol;Acc:HGNC:3575]	0.2857	0.3917	0.2863	0.4233	0.1958	0.6521
ENSG00000183527	PSMG1	proteasome assembly chaperone 1 [Source:HGNC Symbol;Acc:HGNC:3043]	0.2853	0.1216	0.2886	0.1482	0.2627	0.1774
ENSG00000104043	ATP8B4	ATPase phospholipid transporting 8B4 (putative) [Source:HGNC Symbol;Acc:HGNC:13536]	0.285	0.06667	0.2866	0.08356	0.2215	0.2002
ENSG00000273294	C1QTNF3-AMACR	C1QTNF3-AMACR readthrough (NMD candidate) [Source:HGNC Symbol;Acc:HGNC:49198]	0.2849	0.1977	0.2879	0.234	0.1743	0.5157
ENSG00000115750	TAF1B	TATA-box binding protein associated factor, RNA polymerase I subunit B [Source:HGNC Symbol;Acc:HGNC:11533]	0.2848	0.07468	0.2869	0.09894	0.3167	0.06876
ENSG00000116984	MTR	5-methyltetrahydrofolate-homocysteine methyltransferase [Source:HGNC Symbol;Acc:HGNC:7468]	0.2846	0.008166	0.2878	0.02291	0.2432	0.04108
ENSG00000138814	PPP3CA	protein phosphatase 3 catalytic subunit alpha [Source:HGNC Symbol;Acc:HGNC:9314]	0.2846	0.02171	0.2869	0.0342	0.266	0.04192
ENSG00000134444	RELCH	RAB11 binding and LisH domain, coiled-coil and HEAT repeat containing [Source:HGNC Symbol;Acc:HGNC:29289]	0.2846	0.04129	0.2865	0.05404	0.2617	0.07042
ENSG00000156299	TIAM1	TIAM Rac1 associated GEF 1 [Source:HGNC Symbol;Acc:HGNC:11805]	0.2846	0.2331	0.2875	0.2398	0.2437	0.3584
ENSG00000196247	ZNF107	zinc finger protein 107 [Source:HGNC Symbol;Acc:HGNC:12887]	0.2846	0.1069	0.2876	0.1367	0.2733	0.1567
ENSG00000157827	FMNL2	formin like 2 [Source:HGNC Symbol;Acc:HGNC:18267]	0.2843	0.2297	0.287	0.2394	0.2445	0.3876
ENSG00000011405	PIK3C2A	phosphatidylinositol-4-phosphate 3-kinase catalytic subunit type 2 alpha [Source:HGNC Symbol;Acc:HGNC:8971]	0.2838	0.05538	0.2867	0.06961	0.2476	0.1048
ENSG00000188649	CC2D2B	coiled-coil and C2 domain containing 2B [Source:HGNC Symbol;Acc:HGNC:31666]	0.2838	0.1966	0.2885	0.2175	0.2052	0.416
ENSG00000105464	GRIN2D	glutamate ionotropic receptor NMDA type subunit 2D [Source:HGNC Symbol;Acc:HGNC:4588]	0.2837	0.1716	0.2872	0.1978	0.2441	0.314
ENSG00000058272	PPP1R12A	protein phosphatase 1 regulatory subunit 12A [Source:HGNC Symbol;Acc:HGNC:7618]	0.2837	0.01752	0.2855	0.0294	0.2635	0.0323
ENSG00000101132	PFDN4	prefoldin subunit 4 [Source:HGNC Symbol;Acc:HGNC:8868]	0.2832	0.06491	0.2869	0.09559	0.2036	0.2301
ENSG00000151743	AMN1	antagonist of mitotic exit network 1 homolog [Source:HGNC Symbol;Acc:HGNC:27281]	0.2831	0.1168	0.2862	0.1669	0.2411	0.2345
ENSG00000254692		novel protein	0.2828	0.05046	0.2874	0.0801	0.2184	0.1691
ENSG00000172426	RSPH9	radial spoke head component 9 [Source:HGNC Symbol;Acc:HGNC:21057]	0.2825	0.1118	0.2895	0.1619	0.2549	0.2226
ENSG00000197885	NKIRAS1	NFKB inhibitor interacting Ras like 1 [Source:HGNC Symbol;Acc:HGNC:17899]	0.2825	0.07678	0.2851	0.1056	0.2357	0.1913
ENSG00000008869	HEATR5B	HEAT repeat containing 5B [Source:HGNC Symbol;Acc:HGNC:29273]	0.2824	0.05438	0.2854	0.07116	0.3	0.05294
ENSG00000143493	INTS7	integrator complex subunit 7 [Source:HGNC Symbol;Acc:HGNC:24484]	0.2824	0.02781	0.2847	0.06166	0.2518	0.08977
ENSG00000075223	SEMA3C	semaphorin 3C [Source:HGNC Symbol;Acc:HGNC:10725]	0.2823	0.145	0.2807	0.1723	0.2525	0.2623
ENSG00000155100	OTUD6B	OTU deubiquitinase 6B [Source:HGNC Symbol;Acc:HGNC:24281]	0.2823	0.00871	0.2844	0.04139	0.2498	0.05248
ENSG00000170382	LRRN2	leucine rich repeat neuronal 2 [Source:HGNC Symbol;Acc:HGNC:16914]	0.2822	0.183	0.2856	0.1952	0.2126	0.3889
ENSG00000129472	RAB2B	RAB2B, member RAS oncogene family [Source:HGNC Symbol;Acc:HGNC:20246]	0.282	0.1454	0.2859	0.1638	0.2386	0.2515
ENSG00000165359	INTS6L	integrator complex subunit 6 like [Source:HGNC Symbol;Acc:HGNC:27334]	0.282	0.03632	0.2848	0.04674	0.2252	0.1021
ENSG00000198498	TMA16	translation machinery associated 16 homolog [Source:HGNC Symbol;Acc:HGNC:25638]	0.2817	0.0706	0.283	0.1041	0.2574	0.1428
ENSG00000043514	TRIT1	tRNA isopentenyltransferase 1 [Source:HGNC Symbol;Acc:HGNC:20286]	0.2816	0.1282	0.2825	0.1387	0.2283	0.2994
ENSG00000139842	CUL4A	cullin 4A [Source:HGNC Symbol;Acc:HGNC:2554]	0.2816	0.03872	0.2843	0.05307	0.2997	0.04063
ENSG00000118496	FBXO30	F-box protein 30 [Source:HGNC Symbol;Acc:HGNC:15600]	0.2814	0.1395	0.2828	0.1663	0.2689	0.1937
ENSG00000120370	GORAB	golgin, RAB6 interacting [Source:HGNC Symbol;Acc:HGNC:25676]	0.2813	0.06286	0.2843	0.09281	0.228	0.1569
ENSG00000039319	ZFYVE16	zinc finger FYVE-type containing 16 [Source:HGNC Symbol;Acc:HGNC:20756]	0.2813	0.0434	0.2821	0.05694	0.2513	0.08532
ENSG00000165312	OTUD1	OTU deubiquitinase 1 [Source:HGNC Symbol;Acc:HGNC:27346]	0.2812	0.1833	0.2799	0.1898	0.1938	0.4162
ENSG00000169762	TAPT1	transmembrane anterior posterior transformation 1 [Source:HGNC Symbol;Acc:HGNC:26887]	0.2812	0.06638	0.2841	0.08326	0.2307	0.1608
ENSG00000111300	NAA25	N(alpha)-acetyltransferase 25, NatB auxiliary subunit [Source:HGNC Symbol;Acc:HGNC:25783]	0.281	0.1308	0.2837	0.1367	0.2039	0.301
ENSG00000138385	SSB	small RNA binding exonuclease protection factor La [Source:HGNC Symbol;Acc:HGNC:11316]	0.2809	0.0414	0.2833	0.06562	0.2121	0.1668
ENSG00000128590	DNAJB9	DnaJ heat shock protein family (Hsp40) member B9 [Source:HGNC Symbol;Acc:HGNC:6968]	0.2806	0.194	0.2805	0.2135	0.1745	0.5249
ENSG00000146247	PHIP	pleckstrin homology domain interacting protein [Source:HGNC Symbol;Acc:HGNC:15673]	0.2806	0.02049	0.2827	0.03377	0.2767	0.02905
ENSG00000123609	NMI	N-myc and STAT interactor [Source:HGNC Symbol;Acc:HGNC:7854]	0.2804	0.124	0.2818	0.1395	0.2399	0.255
ENSG00000174738	NR1D2	nuclear receptor subfamily 1 group D member 2 [Source:HGNC Symbol;Acc:HGNC:7963]	0.2803	0.1448	0.2833	0.1553	0.2755	0.1809
ENSG00000169758	TMEM266	transmembrane protein 266 [Source:HGNC Symbol;Acc:HGNC:26763]	0.2801	0.308	0.282	0.3449	0.307	0.308
ENSG00000141452	RMC1	regulator of MON1-CCZ1 [Source:HGNC Symbol;Acc:HGNC:24326]	0.28	0.09103	0.2923	0.1456	0.2278	0.254
ENSG00000171943	SRGAP2C	SLIT-ROBO Rho GTPase activating protein 2C [Source:HGNC Symbol;Acc:HGNC:30584]	0.28	0.2625	0.2827	0.2638	0.2571	0.3122
ENSG00000101574	METTL4	methyltransferase like 4 [Source:HGNC Symbol;Acc:HGNC:24726]	0.2797	0.1947	0.2782	0.2261	0.181	0.4676
ENSG00000119673	ACOT2	acyl-CoA thioesterase 2 [Source:HGNC Symbol;Acc:HGNC:18431]	0.2797	0.3083	0.2845	0.3165	0.1382	0.668
ENSG00000168092	PAFAH1B2	platelet activating factor acetylhydrolase 1b catalytic subunit 2 [Source:HGNC Symbol;Acc:HGNC:8575]	0.2797	0.08145	0.2817	0.09582	0.2674	0.1127
ENSG00000103599	IQCH	IQ motif containing H [Source:HGNC Symbol;Acc:HGNC:25721]	0.2795	0.1489	0.2805	0.1892	0.2695	0.234
ENSG00000137364	TPMT	thiopurine S-methyltransferase [Source:HGNC Symbol;Acc:HGNC:12014]	0.2789	0.07393	0.2808	0.09246	0.2665	0.1283
ENSG00000106692	FKTN	fukutin [Source:HGNC Symbol;Acc:HGNC:3622]	0.2788	0.1319	0.2818	0.1593	0.1804	0.3967
ENSG00000156876	SASS6	SAS-6 centriolar assembly protein [Source:HGNC Symbol;Acc:HGNC:25403]	0.2788	0.1654	0.277	0.2415	0.3468	0.1347
ENSG00000198431	TXNRD1	thioredoxin reductase 1 [Source:HGNC Symbol;Acc:HGNC:12437]	0.2787	0.1909	0.2756	0.1971	0.1467	0.5578
ENSG00000127311	HELB	DNA helicase B [Source:HGNC Symbol;Acc:HGNC:17196]	0.2786	0.3649	0.2763	0.3761	0.1949	0.6112
ENSG00000184178	SCFD2	sec1 family domain containing 2 [Source:HGNC Symbol;Acc:HGNC:30676]	0.2784	0.06161	0.282	0.08684	0.2256	0.1567
ENSG00000083535	PIBF1	progesterone immunomodulatory binding factor 1 [Source:HGNC Symbol;Acc:HGNC:23352]	0.2782	0.04293	0.2788	0.08564	0.2938	0.05248
ENSG00000054967	RELT	RELT TNF receptor [Source:HGNC Symbol;Acc:HGNC:13764]	0.2778	0.1771	0.2817	0.1795	0.395	0.1109
ENSG00000143633	C1orf131	chromosome 1 open reading frame 131 [Source:HGNC Symbol;Acc:HGNC:25332]	0.2778	0.1943	0.2788	0.2241	0.3414	0.2101
ENSG00000112290	WASF1	WASP family member 1 [Source:HGNC Symbol;Acc:HGNC:12732]	0.2776	0.4051	0.2784	0.4465	0.3492	0.3686
ENSG00000151806	GUF1	GUF1 homolog, GTPase [Source:HGNC Symbol;Acc:HGNC:25799]	0.2775	0.08781	0.2636	0.2156	0.2711	0.1711
ENSG00000163565	IFI16	interferon gamma inducible protein 16 [Source:HGNC Symbol;Acc:HGNC:5395]	0.2775	0.2089	0.2783	0.2196	0.2279	0.3399
ENSG00000105967	TFEC	transcription factor EC [Source:HGNC Symbol;Acc:HGNC:11754]	0.2774	0.0295	0.2779	0.04367	0.278	0.04459
ENSG00000116560	SFPQ	splicing factor proline and glutamine rich [Source:HGNC Symbol;Acc:HGNC:10774]	0.2772	0.08687	0.2797	0.09883	0.4018	0.04708
ENSG00000091536	MYO15A	myosin XVA [Source:HGNC Symbol;Acc:HGNC:7594]	0.277	0.1425	0.2666	0.2616	0.3001	0.155
ENSG00000196792	STRN3	striatin 3 [Source:HGNC Symbol;Acc:HGNC:15720]	0.277	0.03757	0.2815	0.0636	0.1957	0.1903
ENSG00000155363	MOV10	Mov10 RISC complex RNA helicase [Source:HGNC Symbol;Acc:HGNC:7200]	0.277	0.1486	0.2786	0.1559	0.2127	0.3297
ENSG00000054282	SDCCAG8	serologically defined colon cancer antigen 8 [Source:HGNC Symbol;Acc:HGNC:10671]	0.2767	0.04689	0.2785	0.06512	0.233	0.1279
ENSG00000140563	MCTP2	multiple C2 and transmembrane domain containing 2 [Source:HGNC Symbol;Acc:HGNC:25636]	0.2766	0.4037	0.2752	0.4327	0.3697	0.3325
ENSG00000255663		novel transcript, RBM7-REXO2 readthrough	0.2766	0.3873	0.2815	0.3992	0.4122	0.2858
ENSG00000119729	RHOQ	ras homolog family member Q [Source:HGNC Symbol;Acc:HGNC:17736]	0.2764	0.06997	0.2791	0.08149	0.2519	0.09923
ENSG00000186281	GPAT2	glycerol-3-phosphate acyltransferase 2, mitochondrial [Source:HGNC Symbol;Acc:HGNC:27168]	0.2764	0.4217	0.2781	0.4465	0.1579	0.728
ENSG00000150756	ATPSCKMT	ATP synthase c subunit lysine N-methyltransferase [Source:HGNC Symbol;Acc:HGNC:27029]	0.2763	0.06713	0.2766	0.1206	0.2704	0.1283
ENSG00000151693	ASAP2	ArfGAP with SH3 domain, ankyrin repeat and PH domain 2 [Source:HGNC Symbol;Acc:HGNC:2721]	0.2762	0.3356	0.2786	0.3468	0.2762	0.4464
ENSG00000163002	NUP35	nucleoporin 35 [Source:HGNC Symbol;Acc:HGNC:29797]	0.2761	0.1255	0.2771	0.1957	0.2578	0.2087
ENSG00000198355	PIM3	Pim-3 proto-oncogene, serine/threonine kinase [Source:HGNC Symbol;Acc:HGNC:19310]	0.276	0.2469	0.2786	0.2554	0.4084	0.1025
ENSG00000074935	TUBE1	tubulin epsilon 1 [Source:HGNC Symbol;Acc:HGNC:20775]	0.2757	0.11	0.2788	0.1849	0.2618	0.1764
ENSG00000109436	TBC1D9	TBC1 domain family member 9 [Source:HGNC Symbol;Acc:HGNC:21710]	0.2754	0.0602	0.2777	0.07503	0.2907	0.0822
ENSG00000170035	UBE2E3	ubiquitin conjugating enzyme E2 E3 [Source:HGNC Symbol;Acc:HGNC:12479]	0.2754	0.02148	0.2772	0.03435	0.2425	0.05889
ENSG00000145439	CBR4	carbonyl reductase 4 [Source:HGNC Symbol;Acc:HGNC:25891]	0.2754	0.1703	0.2774	0.1894	0.2054	0.3859
ENSG00000145012	LPP	LIM domain containing preferred translocation partner in lipoma [Source:HGNC Symbol;Acc:HGNC:6679]	0.2753	0.1244	0.2777	0.1355	0.2807	0.1158
ENSG00000150477	KIAA1328	KIAA1328 [Source:HGNC Symbol;Acc:HGNC:29248]	0.2748	0.05233	0.2787	0.09484	0.2259	0.1598
ENSG00000140367	UBE2Q2	ubiquitin conjugating enzyme E2 Q2 [Source:HGNC Symbol;Acc:HGNC:19248]	0.2747	0.2875	0.2799	0.2867	0.225	0.4203
ENSG00000115138	POMC	proopiomelanocortin [Source:HGNC Symbol;Acc:HGNC:9201]	0.2746	0.4551	0.2766	0.4757	0.1269	0.7941
ENSG00000141384	TAF4B	TATA-box binding protein associated factor 4b [Source:HGNC Symbol;Acc:HGNC:11538]	0.2745	0.2402	0.2768	0.2558	0.2418	0.3645
ENSG00000115540	MOB4	MOB family member 4, phocein [Source:HGNC Symbol;Acc:HGNC:17261]	0.2744	0.1533	0.2755	0.1861	0.2481	0.2696
ENSG00000197603	CPLANE1	ciliogenesis and planar polarity effector 1 [Source:HGNC Symbol;Acc:HGNC:25801]	0.2743	0.03903	0.2741	0.09772	0.2818	0.07048
ENSG00000177889	UBE2N	ubiquitin conjugating enzyme E2 N [Source:HGNC Symbol;Acc:HGNC:12492]	0.2743	0.1095	0.2767	0.119	0.2441	0.1711
ENSG00000033867	SLC4A7	solute carrier family 4 member 7 [Source:HGNC Symbol;Acc:HGNC:11033]	0.2741	0.2176	0.2767	0.2242	0.1489	0.5794
ENSG00000164306	PRIMPOL	primase and DNA directed polymerase [Source:HGNC Symbol;Acc:HGNC:26575]	0.2741	0.2617	0.2763	0.2877	0.2642	0.3621
ENSG00000168026	TTC21A	tetratricopeptide repeat domain 21A [Source:HGNC Symbol;Acc:HGNC:30761]	0.2741	0.1031	0.2766	0.134	0.2697	0.1322
ENSG00000170807	LMOD2	leiomodin 2 [Source:HGNC Symbol;Acc:HGNC:6648]	0.2741	0.3418	0.277	0.3871	0.2222	0.509
ENSG00000144724	PTPRG	protein tyrosine phosphatase receptor type G [Source:HGNC Symbol;Acc:HGNC:9671]	0.274	0.5739	0.2702	0.5965	0.1715	0.7647
ENSG00000065060	UHRF1BP1	UHRF1 binding protein 1 [Source:HGNC Symbol;Acc:HGNC:21216]	0.2739	0.07868	0.2749	0.08958	0.287	0.0992
ENSG00000049249	TNFRSF9	TNF receptor superfamily member 9 [Source:HGNC Symbol;Acc:HGNC:11924]	0.2738	0.4693	0.2736	0.5179	0.5472	0.1755
ENSG00000189269	DRICH1	aspartate rich 1 [Source:HGNC Symbol;Acc:HGNC:28031]	0.2738	0.453	0.2747	0.4953	0.4012	0.2977
ENSG00000151151	IPMK	inositol polyphosphate multikinase [Source:HGNC Symbol;Acc:HGNC:20739]	0.2736	0.1012	0.2751	0.1091	0.1799	0.3024
ENSG00000067066	SP100	SP100 nuclear antigen [Source:HGNC Symbol;Acc:HGNC:11206]	0.2733	0.03273	0.2751	0.04975	0.3116	0.02823
ENSG00000169249	ZRSR2	zinc finger CCCH-type, RNA binding motif and serine/arginine rich 2 [Source:HGNC Symbol;Acc:HGNC:23019]	0.2732	0.004113	0.2752	0.01577	0.2601	0.01819
ENSG00000173698	ADGRG2	adhesion G protein-coupled receptor G2 [Source:HGNC Symbol;Acc:HGNC:4516]	0.2732	0.1304	0.2703	0.2253	0.23	0.2646
ENSG00000138640	FAM13A	family with sequence similarity 13 member A [Source:HGNC Symbol;Acc:HGNC:19367]	0.2731	0.0328	0.2749	0.0463	0.2276	0.1301
ENSG00000152332	UHMK1	U2AF homology motif kinase 1 [Source:HGNC Symbol;Acc:HGNC:19683]	0.273	0.03705	0.2739	0.05037	0.2544	0.0572
ENSG00000011523	CEP68	centrosomal protein 68 [Source:HGNC Symbol;Acc:HGNC:29076]	0.2729	0.1244	0.2816	0.1695	0.2585	0.2212
ENSG00000103199	ZNF500	zinc finger protein 500 [Source:HGNC Symbol;Acc:HGNC:23716]	0.2727	0.2719	0.2719	0.2984	0.2563	0.3693
ENSG00000134255	CEPT1	choline/ethanolamine phosphotransferase 1 [Source:HGNC Symbol;Acc:HGNC:24289]	0.2727	0.09132	0.2739	0.1019	0.2305	0.1453
ENSG00000105939	ZC3HAV1	zinc finger CCCH-type containing, antiviral 1 [Source:HGNC Symbol;Acc:HGNC:23721]	0.2726	0.1141	0.274	0.1244	0.2592	0.1556
ENSG00000107949	BCCIP	BRCA2 and CDKN1A interacting protein [Source:HGNC Symbol;Acc:HGNC:978]	0.2726	0.01456	0.2753	0.03409	0.2569	0.0374
ENSG00000198677	TTC37	tetratricopeptide repeat domain 37 [Source:HGNC Symbol;Acc:HGNC:23639]	0.2724	0.04055	0.2753	0.05678	0.1954	0.1495
ENSG00000172878	METAP1D	methionyl aminopeptidase type 1D, mitochondrial [Source:HGNC Symbol;Acc:HGNC:32583]	0.2723	0.3723	0.2778	0.3911	0.07019	0.87
ENSG00000107643	MAPK8	mitogen-activated protein kinase 8 [Source:HGNC Symbol;Acc:HGNC:6881]	0.2722	0.07651	0.2742	0.09134	0.2275	0.1635
ENSG00000133997	MED6	mediator complex subunit 6 [Source:HGNC Symbol;Acc:HGNC:19970]	0.2722	0.1064	0.2766	0.1257	0.2666	0.1281
ENSG00000104765	BNIP3L	BCL2 interacting protein 3 like [Source:HGNC Symbol;Acc:HGNC:1085]	0.2719	0.01396	0.2735	0.02823	0.2993	0.02976
ENSG00000087884	AAMDC	adipogenesis associated Mth938 domain containing [Source:HGNC Symbol;Acc:HGNC:30205]	0.2718	0.1118	0.2745	0.148	0.1858	0.3579
ENSG00000188177	ZC3H6	zinc finger CCCH-type containing 6 [Source:HGNC Symbol;Acc:HGNC:24762]	0.2718	0.1273	0.2746	0.1596	0.1971	0.3591
ENSG00000115295	CLIP4	CAP-Gly domain containing linker protein family member 4 [Source:HGNC Symbol;Acc:HGNC:26108]	0.2717	0.2396	0.2749	0.2359	0.1346	0.6333
ENSG00000170092	SPDYE5	speedy/RINGO cell cycle regulator family member E5 [Source:HGNC Symbol;Acc:HGNC:35464]	0.2717	0.4201	0.2768	0.4354	0.262	0.5293
ENSG00000121060	TRIM25	tripartite motif containing 25 [Source:HGNC Symbol;Acc:HGNC:12932]	0.2715	0.1686	0.2719	0.1885	0.2948	0.1365
ENSG00000156931	VPS8	VPS8 subunit of CORVET complex [Source:HGNC Symbol;Acc:HGNC:29122]	0.2714	0.007096	0.2732	0.02035	0.245	0.02483
ENSG00000171988	JMJD1C	jumonji domain containing 1C [Source:HGNC Symbol;Acc:HGNC:12313]	0.2714	0.1866	0.2739	0.1947	0.3199	0.14
ENSG00000018189	RUFY3	RUN and FYVE domain containing 3 [Source:HGNC Symbol;Acc:HGNC:30285]	0.2713	0.02181	0.2741	0.03483	0.2364	0.0572
ENSG00000198883	PNMA5	PNMA family member 5 [Source:HGNC Symbol;Acc:HGNC:18743]	0.2713	0.4459	0.2721	0.4814	0.3038	0.5072
ENSG00000124209	RAB22A	RAB22A, member RAS oncogene family [Source:HGNC Symbol;Acc:HGNC:9764]	0.271	0.0734	0.2744	0.08533	0.2287	0.1488
ENSG00000151422	FER	FER tyrosine kinase [Source:HGNC Symbol;Acc:HGNC:3655]	0.2709	0.06426	0.2735	0.0998	0.2508	0.1246
ENSG00000101413	RPRD1B	regulation of nuclear pre-mRNA domain containing 1B [Source:HGNC Symbol;Acc:HGNC:16209]	0.2708	0.2676	0.2739	0.264	0.245	0.3353
ENSG00000174953	DHX36	DEAH-box helicase 36 [Source:HGNC Symbol;Acc:HGNC:14410]	0.2706	0.1425	0.2724	0.1498	0.216	0.2525
ENSG00000215375	MYL5	myosin light chain 5 [Source:HGNC Symbol;Acc:HGNC:7586]	0.2705	0.01627	0.2727	0.04157	0.2556	0.05189
ENSG00000159086	PAXBP1	PAX3 and PAX7 binding protein 1 [Source:HGNC Symbol;Acc:HGNC:13579]	0.2703	0.025	0.2721	0.03868	0.2307	0.0697
ENSG00000101972	STAG2	stromal antigen 2 [Source:HGNC Symbol;Acc:HGNC:11355]	0.2702	0.06665	0.2717	0.08098	0.2648	0.09504
ENSG00000198785	GRIN3A	glutamate ionotropic receptor NMDA type subunit 3A [Source:HGNC Symbol;Acc:HGNC:16767]	0.2701	0.2569	0.2722	0.2919	0.2026	0.4938
ENSG00000119866	BCL11A	BAF chromatin remodeling complex subunit BCL11A [Source:HGNC Symbol;Acc:HGNC:13221]	0.27	0.08364	0.2711	0.1155	0.2938	0.09744
ENSG00000171763	SPATA5L1	spermatogenesis associated 5 like 1 [Source:HGNC Symbol;Acc:HGNC:28762]	0.2699	0.2033	0.2726	0.224	0.24	0.3338
ENSG00000115548	KDM3A	lysine demethylase 3A [Source:HGNC Symbol;Acc:HGNC:20815]	0.2698	0.09589	0.273	0.1046	0.2327	0.1757
ENSG00000051341	POLQ	DNA polymerase theta [Source:HGNC Symbol;Acc:HGNC:9186]	0.2697	0.4209	0.2643	0.4249	-0.1146	0.7706
ENSG00000146463	ZMYM4	zinc finger MYM-type containing 4 [Source:HGNC Symbol;Acc:HGNC:13055]	0.2697	0.01121	0.2722	0.025	0.2462	0.02365
ENSG00000189283	FHIT	fragile histidine triad diadenosine triphosphatase [Source:HGNC Symbol;Acc:HGNC:3701]	0.2697	0.1202	0.2728	0.1614	0.2356	0.2208
ENSG00000068784	SRBD1	S1 RNA binding domain 1 [Source:HGNC Symbol;Acc:HGNC:25521]	0.2696	0.04713	0.2721	0.07836	0.2091	0.1726
ENSG00000153207	AHCTF1	AT-hook containing transcription factor 1 [Source:HGNC Symbol;Acc:HGNC:24618]	0.2696	0.2743	0.2713	0.271	0.2286	0.3549
ENSG00000170365	SMAD1	SMAD family member 1 [Source:HGNC Symbol;Acc:HGNC:6767]	0.2695	0.1594	0.2691	0.1969	0.2837	0.1871
ENSG00000119650	IFT43	intraflagellar transport 43 [Source:HGNC Symbol;Acc:HGNC:29669]	0.2694	0.06337	0.2734	0.1025	0.2266	0.1533
ENSG00000197579	TOPORS	TOP1 binding arginine/serine rich protein [Source:HGNC Symbol;Acc:HGNC:21653]	0.2694	0.1429	0.2707	0.1719	0.2545	0.2367
ENSG00000198648	STK39	serine/threonine kinase 39 [Source:HGNC Symbol;Acc:HGNC:17717]	0.2694	0.08198	0.2695	0.1214	0.2823	0.1069
ENSG00000166263	STXBP4	syntaxin binding protein 4 [Source:HGNC Symbol;Acc:HGNC:19694]	0.2691	0.1974	0.2735	0.2662	0.2623	0.2571
ENSG00000102524	TNFSF13B	TNF superfamily member 13b [Source:HGNC Symbol;Acc:HGNC:11929]	0.2689	0.1157	0.2687	0.1303	0.257	0.1562
ENSG00000197046	SIGLEC15	sialic acid binding Ig like lectin 15 [Source:HGNC Symbol;Acc:HGNC:27596]	0.2689	0.2154	0.268	0.2648	0.3098	0.1635
ENSG00000255292		novel transcript	0.2689	0.3291	0.2758	0.3616	0.06734	0.8506
ENSG00000104412	EMC2	ER membrane protein complex subunit 2 [Source:HGNC Symbol;Acc:HGNC:28963]	0.2688	0.05044	0.2724	0.08538	0.1798	0.2266
ENSG00000183735	TBK1	TANK binding kinase 1 [Source:HGNC Symbol;Acc:HGNC:11584]	0.2687	0.1023	0.2725	0.1134	0.2815	0.09492
ENSG00000088451	TGDS	TDP-glucose 4,6-dehydratase [Source:HGNC Symbol;Acc:HGNC:20324]	0.2685	0.2529	0.2689	0.2888	0.2131	0.4689
ENSG00000056558	TRAF1	TNF receptor associated factor 1 [Source:HGNC Symbol;Acc:HGNC:12031]	0.2681	0.1462	0.2711	0.1644	0.2044	0.3239
ENSG00000115504	EHBP1	EH domain binding protein 1 [Source:HGNC Symbol;Acc:HGNC:29144]	0.2681	0.03827	0.2707	0.07915	0.2378	0.1058
ENSG00000100578	KIAA0586	KIAA0586 [Source:HGNC Symbol;Acc:HGNC:19960]	0.268	0.02538	0.2712	0.06555	0.2212	0.09744
ENSG00000177888	ZBTB41	zinc finger and BTB domain containing 41 [Source:HGNC Symbol;Acc:HGNC:24819]	0.268	0.1309	0.2696	0.1673	0.2695	0.1711
ENSG00000179397	CATSPERE	catsper channel auxiliary subunit epsilon [Source:HGNC Symbol;Acc:HGNC:28491]	0.268	0.255	0.2705	0.3044	0.2436	0.4265
ENSG00000135537	AFG1L	AFG1 like ATPase [Source:HGNC Symbol;Acc:HGNC:16411]	0.2679	0.1418	0.2674	0.2014	0.2334	0.2399
ENSG00000184083	FAM120C	family with sequence similarity 120C [Source:HGNC Symbol;Acc:HGNC:16949]	0.2678	0.0261	0.2711	0.06099	0.2289	0.08589
ENSG00000139977	NAA30	N(alpha)-acetyltransferase 30, NatC catalytic subunit [Source:HGNC Symbol;Acc:HGNC:19844]	0.2678	0.1018	0.2694	0.145	0.2954	0.09915
ENSG00000166446	CDYL2	chromodomain Y like 2 [Source:HGNC Symbol;Acc:HGNC:23030]	0.2678	0.1276	0.2675	0.1458	0.2771	0.1635
ENSG00000131089	ARHGEF9	Cdc42 guanine nucleotide exchange factor 9 [Source:HGNC Symbol;Acc:HGNC:14561]	0.2677	0.03866	0.2707	0.07454	0.2133	0.1466
ENSG00000164329	TENT2	terminal nucleotidyltransferase 2 [Source:HGNC Symbol;Acc:HGNC:26776]	0.2676	0.0611	0.2686	0.0748	0.2409	0.09251
ENSG00000164125	GASK1B	golgi associated kinase 1B [Source:HGNC Symbol;Acc:HGNC:25312]	0.2672	0.3133	0.2645	0.335	0.3015	0.3143
ENSG00000187105	HEATR4	HEAT repeat containing 4 [Source:HGNC Symbol;Acc:HGNC:16761]	0.2672	0.2754	0.2771	0.3315	0.1929	0.513
ENSG00000084110	HAL	histidine ammonia-lyase [Source:HGNC Symbol;Acc:HGNC:4806]	0.2669	0.0689	0.2671	0.08538	0.2311	0.1371
ENSG00000147316	MCPH1	microcephalin 1 [Source:HGNC Symbol;Acc:HGNC:6954]	0.2669	0.05846	0.2689	0.09307	0.2854	0.0643
ENSG00000108389	MTMR4	myotubularin related protein 4 [Source:HGNC Symbol;Acc:HGNC:7452]	0.2667	0.05613	0.2681	0.07322	0.2819	0.05308
ENSG00000005379	TSPOAP1	TSPO associated protein 1 [Source:HGNC Symbol;Acc:HGNC:16831]	0.2665	0.5783	0.2719	0.5436	0.5203	0.3098
ENSG00000135424	ITGA7	integrin subunit alpha 7 [Source:HGNC Symbol;Acc:HGNC:6143]	0.2663	0.5147	0.2653	0.528	0.1573	0.7769
ENSG00000101752	MIB1	mindbomb E3 ubiquitin protein ligase 1 [Source:HGNC Symbol;Acc:HGNC:21086]	0.2658	0.02081	0.2686	0.04103	0.1982	0.1146
ENSG00000181904	C5orf24	chromosome 5 open reading frame 24 [Source:HGNC Symbol;Acc:HGNC:26746]	0.2658	0.1308	0.2671	0.1586	0.2243	0.2641
ENSG00000020922	MRE11	MRE11 homolog, double strand break repair nuclease [Source:HGNC Symbol;Acc:HGNC:7230]	0.2657	0.09126	0.2687	0.1064	0.1959	0.2353
ENSG00000071243	ING3	inhibitor of growth family member 3 [Source:HGNC Symbol;Acc:HGNC:14587]	0.2656	0.01371	0.2665	0.03701	0.2504	0.04543
ENSG00000171262	FAM98B	family with sequence similarity 98 member B [Source:HGNC Symbol;Acc:HGNC:26773]	0.2656	0.1397	0.2684	0.1894	0.2343	0.2634
ENSG00000178217	SH2D4B	SH2 domain containing 4B [Source:HGNC Symbol;Acc:HGNC:31440]	0.2655	0.5433	0.2722	0.5602	-0.07694	0.9036
ENSG00000100124	ANKRD54	ankyrin repeat domain 54 [Source:HGNC Symbol;Acc:HGNC:25185]	0.2653	0.09289	0.2687	0.1293	0.1858	0.2877
ENSG00000163864	NMNAT3	nicotinamide nucleotide adenylyltransferase 3 [Source:HGNC Symbol;Acc:HGNC:20989]	0.2653	0.2075	0.2656	0.2437	0.2529	0.2843
ENSG00000172493	AFF1	AF4/FMR2 family member 1 [Source:HGNC Symbol;Acc:HGNC:7135]	0.2652	0.03074	0.2657	0.04499	0.2385	0.05896
ENSG00000181804	SLC9A9	solute carrier family 9 member A9 [Source:HGNC Symbol;Acc:HGNC:20653]	0.2652	0.07457	0.2666	0.09281	0.2475	0.1128
ENSG00000033030	ZCCHC8	zinc finger CCHC-type containing 8 [Source:HGNC Symbol;Acc:HGNC:25265]	0.2651	0.008636	0.2662	0.03176	0.2546	0.02823
ENSG00000112339	HBS1L	HBS1 like translational GTPase [Source:HGNC Symbol;Acc:HGNC:4834]	0.2651	0.0329	0.2669	0.05523	0.2668	0.0362
ENSG00000197323	TRIM33	tripartite motif containing 33 [Source:HGNC Symbol;Acc:HGNC:16290]	0.265	0.02936	0.2665	0.04265	0.2442	0.05248
ENSG00000114933	INO80D	INO80 complex subunit D [Source:HGNC Symbol;Acc:HGNC:25997]	0.2649	0.05989	0.2671	0.07485	0.2271	0.1065
ENSG00000172716	SLFN11	schlafen family member 11 [Source:HGNC Symbol;Acc:HGNC:26633]	0.2649	0.03442	0.2665	0.05041	0.2559	0.06107
ENSG00000165533	TTC8	tetratricopeptide repeat domain 8 [Source:HGNC Symbol;Acc:HGNC:20087]	0.2649	0.2267	0.2657	0.2919	0.2581	0.2668
ENSG00000198862	LTN1	listerin E3 ubiquitin protein ligase 1 [Source:HGNC Symbol;Acc:HGNC:13082]	0.2645	0.05703	0.2659	0.08538	0.2367	0.1216
ENSG00000226321	CROCC2	ciliary rootlet coiled-coil, rootletin family member 2 [Source:HGNC Symbol;Acc:HGNC:51677]	0.2644	0.4115	0.2656	0.418	0.1566	0.7194
ENSG00000181634	TNFSF15	TNF superfamily member 15 [Source:HGNC Symbol;Acc:HGNC:11931]	0.2643	0.5841	0.2686	0.6013	0.1729	0.7909
ENSG00000188786	MTF1	metal regulatory transcription factor 1 [Source:HGNC Symbol;Acc:HGNC:7428]	0.2642	0.0375	0.2657	0.05238	0.2537	0.0678
ENSG00000104549	SQLE	squalene epoxidase [Source:HGNC Symbol;Acc:HGNC:11279]	0.2641	0.3767	0.2681	0.3748	0.08216	0.8351
ENSG00000122257	RBBP6	RB binding protein 6, ubiquitin ligase [Source:HGNC Symbol;Acc:HGNC:9889]	0.2641	0.002361	0.266	0.01189	0.266	0.01064
ENSG00000116212	LRRC42	leucine rich repeat containing 42 [Source:HGNC Symbol;Acc:HGNC:28792]	0.264	0.03827	0.2624	0.08538	0.2644	0.08106
ENSG00000196505	GDAP2	ganglioside induced differentiation associated protein 2 [Source:HGNC Symbol;Acc:HGNC:18010]	0.2639	0.02876	0.2659	0.04581	0.2366	0.05513
ENSG00000196743	GM2A	GM2 ganglioside activator [Source:HGNC Symbol;Acc:HGNC:4367]	0.2638	0.03994	0.2632	0.06069	0.2903	0.03087
ENSG00000079134	THOC1	THO complex 1 [Source:HGNC Symbol;Acc:HGNC:19070]	0.2637	0.238	0.2678	0.2394	0.1963	0.3995
ENSG00000204345	CD300LD	CD300 molecule like family member d [Source:HGNC Symbol;Acc:HGNC:16848]	0.2637	0.4721	0.2721	0.4666	0.1793	0.6816
ENSG00000165355	FBXO33	F-box protein 33 [Source:HGNC Symbol;Acc:HGNC:19833]	0.2636	0.1324	0.2644	0.1495	0.2632	0.1592
ENSG00000115977	AAK1	AP2 associated kinase 1 [Source:HGNC Symbol;Acc:HGNC:19679]	0.2635	0.04964	0.2659	0.06648	0.282	0.04499
ENSG00000169242	EFNA1	ephrin A1 [Source:HGNC Symbol;Acc:HGNC:3221]	0.2634	0.8099	0.2625	0.8114	-0.02904	0.9815
ENSG00000138463	SLC49A4	solute carrier family 49 member 4 [Source:HGNC Symbol;Acc:HGNC:16628]	0.2631	0.1595	0.2636	0.169	0.1872	0.3374
ENSG00000175003	SLC22A1	solute carrier family 22 member 1 [Source:HGNC Symbol;Acc:HGNC:10963]	0.2631	0.5644	0.2635	0.5868	0.2626	0.6829
ENSG00000104432	IL7	interleukin 7 [Source:HGNC Symbol;Acc:HGNC:6023]	0.263	0.2282	0.2639	0.2806	0.3033	0.2151
ENSG00000171827	ZNF570	zinc finger protein 570 [Source:HGNC Symbol;Acc:HGNC:26416]	0.263	0.3033	0.263	0.3855	0.2917	0.3018
ENSG00000116977	LGALS8	galectin 8 [Source:HGNC Symbol;Acc:HGNC:6569]	0.2628	0.03218	0.2635	0.04861	0.2732	0.03764
ENSG00000138069	RAB1A	RAB1A, member RAS oncogene family [Source:HGNC Symbol;Acc:HGNC:9758]	0.2626	0.1654	0.2645	0.1753	0.2773	0.161
ENSG00000156958	GALK2	galactokinase 2 [Source:HGNC Symbol;Acc:HGNC:4119]	0.2626	0.1001	0.2654	0.1348	0.2362	0.1683
ENSG00000198625	MDM4	MDM4 regulator of p53 [Source:HGNC Symbol;Acc:HGNC:6974]	0.2626	0.1545	0.2647	0.1639	0.2547	0.2025
ENSG00000164989	CCDC171	coiled-coil domain containing 171 [Source:HGNC Symbol;Acc:HGNC:29828]	0.2621	0.4789	0.2646	0.5225	0.1259	0.7525
ENSG00000117133	RPF1	ribosome production factor 1 homolog [Source:HGNC Symbol;Acc:HGNC:30350]	0.262	0.05708	0.2642	0.08227	0.2672	0.06901
ENSG00000051825	MPHOSPH9	M-phase phosphoprotein 9 [Source:HGNC Symbol;Acc:HGNC:7215]	0.2619	0.01444	0.2689	0.04198	0.1988	0.09504
ENSG00000136933	RABEPK	Rab9 effector protein with kelch motifs [Source:HGNC Symbol;Acc:HGNC:16896]	0.2618	0.01129	0.2667	0.04243	0.2192	0.0794
ENSG00000102763	VWA8	von Willebrand factor A domain containing 8 [Source:HGNC Symbol;Acc:HGNC:29071]	0.2616	0.01943	0.264	0.05285	0.2333	0.05635
ENSG00000153922	CHD1	chromodomain helicase DNA binding protein 1 [Source:HGNC Symbol;Acc:HGNC:1915]	0.2615	0.2292	0.2635	0.2317	0.2935	0.2008
ENSG00000119771	KLHL29	kelch like family member 29 [Source:HGNC Symbol;Acc:HGNC:29404]	0.2614	0.1704	0.2671	0.208	0.1786	0.4485
ENSG00000134602	STK26	serine/threonine kinase 26 [Source:HGNC Symbol;Acc:HGNC:18174]	0.2614	0.08333	0.2634	0.1034	0.2263	0.1566
ENSG00000096717	SIRT1	sirtuin 1 [Source:HGNC Symbol;Acc:HGNC:14929]	0.2612	0.0759	0.2632	0.1011	0.2778	0.08381
ENSG00000125148	MT2A	metallothionein 2A [Source:HGNC Symbol;Acc:HGNC:7406]	0.2612	0.5336	0.2575	0.5249	-0.03724	0.9469
ENSG00000102908	NFAT5	nuclear factor of activated T cells 5 [Source:HGNC Symbol;Acc:HGNC:7774]	0.2609	0.166	0.2635	0.1725	0.2137	0.27
ENSG00000082269	FAM135A	family with sequence similarity 135 member A [Source:HGNC Symbol;Acc:HGNC:21084]	0.2608	0.1041	0.264	0.1248	0.2025	0.2476
ENSG00000135334	AKIRIN2	akirin 2 [Source:HGNC Symbol;Acc:HGNC:21407]	0.2608	0.168	0.261	0.1812	0.2566	0.1877
ENSG00000178074	C2orf69	chromosome 2 open reading frame 69 [Source:HGNC Symbol;Acc:HGNC:26799]	0.2608	0.05835	0.2642	0.09545	0.1893	0.1978
ENSG00000183044	ABAT	4-aminobutyrate aminotransferase [Source:HGNC Symbol;Acc:HGNC:23]	0.2608	0.1072	0.2616	0.133	0.2267	0.2215
ENSG00000071189	SNX13	sorting nexin 13 [Source:HGNC Symbol;Acc:HGNC:21335]	0.2605	0.07046	0.2626	0.08821	0.2381	0.1062
ENSG00000056277	ZNF280C	zinc finger protein 280C [Source:HGNC Symbol;Acc:HGNC:25955]	0.2603	0.2469	0.2644	0.2712	0.168	0.51
ENSG00000134852	CLOCK	clock circadian regulator [Source:HGNC Symbol;Acc:HGNC:2082]	0.2603	0.06513	0.2652	0.1303	0.2507	0.1134
ENSG00000198130	HIBCH	3-hydroxyisobutyryl-CoA hydrolase [Source:HGNC Symbol;Acc:HGNC:4908]	0.2603	0.1253	0.2632	0.1687	0.2235	0.2509
ENSG00000072364	AFF4	AF4/FMR2 family member 4 [Source:HGNC Symbol;Acc:HGNC:17869]	0.2602	0.1431	0.2629	0.1583	0.2704	0.1371
ENSG00000169554	ZEB2	zinc finger E-box binding homeobox 2 [Source:HGNC Symbol;Acc:HGNC:14881]	0.2601	0.03798	0.2611	0.06069	0.359	0.0178
ENSG00000204178	MACO1	macoilin 1 [Source:HGNC Symbol;Acc:HGNC:25572]	0.2601	0.0922	0.2635	0.1166	0.2461	0.144
ENSG00000214517	PPME1	protein phosphatase methylesterase 1 [Source:HGNC Symbol;Acc:HGNC:30178]	0.26	0.1477	0.2659	0.1876	0.1801	0.3693
ENSG00000124789	NUP153	nucleoporin 153 [Source:HGNC Symbol;Acc:HGNC:8062]	0.2599	0.06125	0.2626	0.07532	0.2351	0.09424
ENSG00000127914	AKAP9	A-kinase anchoring protein 9 [Source:HGNC Symbol;Acc:HGNC:379]	0.2599	0.05834	0.2627	0.0755	0.2419	0.09787
ENSG00000115919	KYNU	kynureninase [Source:HGNC Symbol;Acc:HGNC:6469]	0.2598	0.3131	0.2606	0.3201	0.2327	0.3955
ENSG00000264545		novel transcript	0.2596	0.4547	0.2612	0.5093	0.2432	0.5379
ENSG00000277149	TYW1B	tRNA-yW synthesizing protein 1 homolog B [Source:HGNC Symbol;Acc:HGNC:33908]	0.2595	0.02621	0.2615	0.07849	0.2429	0.0724
ENSG00000083896	YTHDC1	YTH domain containing 1 [Source:HGNC Symbol;Acc:HGNC:30626]	0.2594	0.09194	0.2618	0.1071	0.2722	0.0934
ENSG00000242550	SERPINB10	serpin family B member 10 [Source:HGNC Symbol;Acc:HGNC:8942]	0.2593	0.6485	0.2523	0.6632	-0.06144	0.9385
ENSG00000113460	BRIX1	biogenesis of ribosomes BRX1 [Source:HGNC Symbol;Acc:HGNC:24170]	0.2591	0.06488	0.2607	0.1146	0.2529	0.1112
ENSG00000150995	ITPR1	inositol 1,4,5-trisphosphate receptor type 1 [Source:HGNC Symbol;Acc:HGNC:6180]	0.259	0.02418	0.2602	0.04265	0.2947	0.02358
ENSG00000136122	BORA	BORA aurora kinase A activator [Source:HGNC Symbol;Acc:HGNC:24724]	0.259	0.1623	0.2601	0.1964	0.2535	0.2325
ENSG00000183779	ZNF703	zinc finger protein 703 [Source:HGNC Symbol;Acc:HGNC:25883]	0.259	0.5283	0.2585	0.5067	0.11	0.8341
ENSG00000179021	C3orf38	chromosome 3 open reading frame 38 [Source:HGNC Symbol;Acc:HGNC:28384]	0.2589	0.007096	0.2612	0.02186	0.2286	0.03321
ENSG00000135249	RINT1	RAD50 interactor 1 [Source:HGNC Symbol;Acc:HGNC:21876]	0.2587	0.1773	0.262	0.1927	0.1761	0.3895
ENSG00000113851	CRBN	cereblon [Source:HGNC Symbol;Acc:HGNC:30185]	0.2587	0.04863	0.2602	0.06646	0.2537	0.07803
ENSG00000074621	SLC24A1	solute carrier family 24 member 1 [Source:HGNC Symbol;Acc:HGNC:10975]	0.2586	0.1523	0.2623	0.1789	0.1935	0.3693
ENSG00000172771	EFCAB12	EF-hand calcium binding domain 12 [Source:HGNC Symbol;Acc:HGNC:28061]	0.2585	0.4524	0.2604	0.4964	0.4347	0.198
ENSG00000101977	MCF2	MCF.2 cell line derived transforming sequence [Source:HGNC Symbol;Acc:HGNC:6940]	0.2584	0.4992	0.2599	0.5349	0.3928	0.3577
ENSG00000156804	FBXO32	F-box protein 32 [Source:HGNC Symbol;Acc:HGNC:16731]	0.2584	0.2074	0.2595	0.2398	0.207	0.3938
ENSG00000164117	FBXO8	F-box protein 8 [Source:HGNC Symbol;Acc:HGNC:13587]	0.2584	0.1094	0.2595	0.1593	0.2673	0.15
ENSG00000196376	SLC35F1	solute carrier family 35 member F1 [Source:HGNC Symbol;Acc:HGNC:21483]	0.2584	0.5257	0.254	0.4975	-0.08008	0.8016
ENSG00000100852	ARHGAP5	Rho GTPase activating protein 5 [Source:HGNC Symbol;Acc:HGNC:675]	0.2583	0.0855	0.2628	0.1205	0.2062	0.2322
ENSG00000149089	APIP	APAF1 interacting protein [Source:HGNC Symbol;Acc:HGNC:17581]	0.2583	0.2254	0.2601	0.2398	0.1712	0.4737
ENSG00000165244	ZNF367	zinc finger protein 367 [Source:HGNC Symbol;Acc:HGNC:18320]	0.2583	0.2833	0.2529	0.3854	0.301	0.2234
ENSG00000182831	C16orf72	chromosome 16 open reading frame 72 [Source:HGNC Symbol;Acc:HGNC:30103]	0.2583	0.1694	0.26	0.1836	0.3683	0.07526
ENSG00000083799	CYLD	CYLD lysine 63 deubiquitinase [Source:HGNC Symbol;Acc:HGNC:2584]	0.2582	0.04234	0.261	0.06257	0.2888	0.03758
ENSG00000117616	RSRP1	arginine and serine rich protein 1 [Source:HGNC Symbol;Acc:HGNC:25234]	0.2582	0.04986	0.259	0.06789	0.2735	0.08716
ENSG00000158874	APOA2	apolipoprotein A2 [Source:HGNC Symbol;Acc:HGNC:601]	0.2582	0.354	0.2609	0.3578	0.1463	0.6717
ENSG00000183092	BEGAIN	brain enriched guanylate kinase associated [Source:HGNC Symbol;Acc:HGNC:24163]	0.2579	0.6264	0.2628	0.6217	0.6323	0.3239
ENSG00000117000	RLF	rearranged L-myc fusion [Source:HGNC Symbol;Acc:HGNC:10025]	0.2576	0.1643	0.2606	0.1714	0.2142	0.2777
ENSG00000211452	DIO1	iodothyronine deiodinase 1 [Source:HGNC Symbol;Acc:HGNC:2883]	0.2575	0.2781	0.2692	0.347	0.1986	0.4833
ENSG00000083544	TDRD3	tudor domain containing 3 [Source:HGNC Symbol;Acc:HGNC:20612]	0.2574	0.01185	0.26	0.04669	0.2289	0.04982
ENSG00000121594	CD80	CD80 molecule [Source:HGNC Symbol;Acc:HGNC:1700]	0.2573	0.5747	0.2646	0.5697	0.03446	0.9578
ENSG00000102543	CDADC1	cytidine and dCMP deaminase domain containing 1 [Source:HGNC Symbol;Acc:HGNC:20299]	0.2572	0.08288	0.2611	0.1205	0.2176	0.1781
ENSG00000113532	ST8SIA4	ST8 alpha-N-acetyl-neuraminide alpha-2,8-sialyltransferase 4 [Source:HGNC Symbol;Acc:HGNC:10871]	0.2572	0.2085	0.2587	0.2157	0.2723	0.2035
ENSG00000114331	ACAP2	ArfGAP with coiled-coil, ankyrin repeat and PH domains 2 [Source:HGNC Symbol;Acc:HGNC:16469]	0.2572	0.005677	0.2583	0.02113	0.2762	0.01323
ENSG00000140455	USP3	ubiquitin specific peptidase 3 [Source:HGNC Symbol;Acc:HGNC:12626]	0.2572	0.1372	0.2598	0.1531	0.2903	0.1292
ENSG00000113649	TCERG1	transcription elongation regulator 1 [Source:HGNC Symbol;Acc:HGNC:15630]	0.2571	0.1397	0.26	0.1518	0.2345	0.1943
ENSG00000147174	GCNA	germ cell nuclear acidic peptidase [Source:HGNC Symbol;Acc:HGNC:15805]	0.257	0.248	0.2629	0.3062	0.1999	0.4334
ENSG00000134108	ARL8B	ADP ribosylation factor like GTPase 8B [Source:HGNC Symbol;Acc:HGNC:25564]	0.2569	0.02062	0.2585	0.03675	0.2453	0.03475
ENSG00000152242	C18orf25	chromosome 18 open reading frame 25 [Source:HGNC Symbol;Acc:HGNC:28172]	0.2569	0.06711	0.2595	0.08503	0.2383	0.09124
ENSG00000170113	NIPA1	NIPA magnesium transporter 1 [Source:HGNC Symbol;Acc:HGNC:17043]	0.2566	0.4476	0.2568	0.4694	0.04708	0.9203
ENSG00000123124	WWP1	WW domain containing E3 ubiquitin protein ligase 1 [Source:HGNC Symbol;Acc:HGNC:17004]	0.2564	0.05087	0.2568	0.06561	0.1688	0.226
ENSG00000162775	RBM15	RNA binding motif protein 15 [Source:HGNC Symbol;Acc:HGNC:14959]	0.2564	0.04289	0.2582	0.06273	0.2403	0.08029
ENSG00000266086		novel transcript	0.2564	0.2586	0.2591	0.2637	0.1456	0.6026
ENSG00000137101	CD72	CD72 molecule [Source:HGNC Symbol;Acc:HGNC:1696]	0.2563	0.1174	0.2603	0.1531	0.1717	0.3764
ENSG00000185722	ANKFY1	ankyrin repeat and FYVE domain containing 1 [Source:HGNC Symbol;Acc:HGNC:20763]	0.2561	0.03131	0.2591	0.06315	0.2139	0.1115
ENSG00000213648	SULT1A4	sulfotransferase family 1A member 4 [Source:HGNC Symbol;Acc:HGNC:30004]	0.2559	0.7926	0.249	0.8025	0.2982	0.764
ENSG00000164715	LMTK2	lemur tyrosine kinase 2 [Source:HGNC Symbol;Acc:HGNC:17880]	0.2558	0.1797	0.257	0.1851	0.2617	0.1829
ENSG00000168038	ULK4	unc-51 like kinase 4 [Source:HGNC Symbol;Acc:HGNC:15784]	0.2555	0.2207	0.2598	0.2355	0.2024	0.3846
ENSG00000185838	GNB1L	G protein subunit beta 1 like [Source:HGNC Symbol;Acc:HGNC:4397]	0.2555	0.3108	0.2516	0.3253	0.02424	0.9392
ENSG00000138735	PDE5A	phosphodiesterase 5A [Source:HGNC Symbol;Acc:HGNC:8784]	0.2554	0.04942	0.2595	0.09129	0.1834	0.2386
ENSG00000041982	TNC	tenascin C [Source:HGNC Symbol;Acc:HGNC:5318]	0.2553	0.3641	0.2574	0.4042	0.1715	0.6555
ENSG00000119878	CRIPT	CXXC repeat containing interactor of PDZ3 domain [Source:HGNC Symbol;Acc:HGNC:14312]	0.2553	0.1646	0.2591	0.1985	0.2003	0.3398
ENSG00000147905	ZCCHC7	zinc finger CCHC-type containing 7 [Source:HGNC Symbol;Acc:HGNC:26209]	0.2553	0.03705	0.2609	0.06882	0.1706	0.1968
ENSG00000113734	BNIP1	BCL2 interacting protein 1 [Source:HGNC Symbol;Acc:HGNC:1082]	0.2552	0.1738	0.2581	0.2051	0.2788	0.1897
ENSG00000115520	COQ10B	coenzyme Q10B [Source:HGNC Symbol;Acc:HGNC:25819]	0.2552	0.1281	0.2567	0.1584	0.2835	0.1235
ENSG00000185156	MFSD6L	major facilitator superfamily domain containing 6 like [Source:HGNC Symbol;Acc:HGNC:26656]	0.2552	0.5885	0.2591	0.6097	0.3311	0.5301
ENSG00000118263	KLF7	Kruppel like factor 7 [Source:HGNC Symbol;Acc:HGNC:6350]	0.2551	0.0666	0.257	0.08856	0.2851	0.05613
ENSG00000188037	CLCN1	chloride voltage-gated channel 1 [Source:HGNC Symbol;Acc:HGNC:2019]	0.2551	0.7479	0.2635	0.7414	-0.8086	0.3144
ENSG00000198825	INPP5F	inositol polyphosphate-5-phosphatase F [Source:HGNC Symbol;Acc:HGNC:17054]	0.255	0.03869	0.2595	0.0768	0.2159	0.1235
ENSG00000164944	VIRMA	vir like m6A methyltransferase associated [Source:HGNC Symbol;Acc:HGNC:24500]	0.2549	0.03135	0.2569	0.05414	0.2489	0.05741
ENSG00000078177	N4BP2	NEDD4 binding protein 2 [Source:HGNC Symbol;Acc:HGNC:29851]	0.2547	0.1518	0.2585	0.1749	0.1788	0.372
ENSG00000153561	RMND5A	required for meiotic nuclear division 5 homolog A [Source:HGNC Symbol;Acc:HGNC:25850]	0.2547	0.09103	0.2565	0.1079	0.2432	0.1639
ENSG00000105835	NAMPT	nicotinamide phosphoribosyltransferase [Source:HGNC Symbol;Acc:HGNC:30092]	0.2546	0.6104	0.2548	0.5989	0.3793	0.4623
ENSG00000165434	PGM2L1	phosphoglucomutase 2 like 1 [Source:HGNC Symbol;Acc:HGNC:20898]	0.2546	0.3041	0.2527	0.3802	0.3264	0.2181
ENSG00000152620	NADK2	NAD kinase 2, mitochondrial [Source:HGNC Symbol;Acc:HGNC:26404]	0.2543	0.05878	0.2583	0.1018	0.1892	0.1903
ENSG00000145819	ARHGAP26	Rho GTPase activating protein 26 [Source:HGNC Symbol;Acc:HGNC:17073]	0.254	0.1402	0.2566	0.1577	0.3065	0.1065
ENSG00000163617	CCDC191	coiled-coil domain containing 191 [Source:HGNC Symbol;Acc:HGNC:29272]	0.2539	0.1805	0.2495	0.2702	0.2263	0.3096
ENSG00000119661	DNAL1	dynein axonemal light chain 1 [Source:HGNC Symbol;Acc:HGNC:23247]	0.2537	0.2343	0.249	0.3267	0.2833	0.2148
ENSG00000186908	ZDHHC17	zinc finger DHHC-type containing 17 [Source:HGNC Symbol;Acc:HGNC:18412]	0.2537	0.03538	0.2554	0.05542	0.2329	0.06533
ENSG00000085231	AK6	adenylate kinase 6 [Source:HGNC Symbol;Acc:HGNC:49151]	0.2536	0.2201	0.2524	0.2905	0.2579	0.2724
ENSG00000135317	SNX14	sorting nexin 14 [Source:HGNC Symbol;Acc:HGNC:14977]	0.2535	0.05278	0.2542	0.07372	0.1982	0.1308
ENSG00000185278	ZBTB37	zinc finger and BTB domain containing 37 [Source:HGNC Symbol;Acc:HGNC:28365]	0.2535	0.08288	0.2557	0.1097	0.1864	0.255
ENSG00000083642	PDS5B	PDS5 cohesin associated factor B [Source:HGNC Symbol;Acc:HGNC:20418]	0.2534	0.03546	0.2557	0.05808	0.2386	0.06083
ENSG00000150054	MPP7	membrane palmitoylated protein 7 [Source:HGNC Symbol;Acc:HGNC:26542]	0.2534	0.09539	0.2565	0.1216	0.2695	0.1036
ENSG00000188647	PTAR1	protein prenyltransferase alpha subunit repeat containing 1 [Source:HGNC Symbol;Acc:HGNC:30449]	0.2534	0.05514	0.2554	0.0758	0.243	0.09169
ENSG00000143190	POU2F1	POU class 2 homeobox 1 [Source:HGNC Symbol;Acc:HGNC:9212]	0.2533	0.1438	0.2558	0.1583	0.2368	0.1816
ENSG00000233757		novel C2H2 type zinc finger protein	0.2533	0.3902	0.2467	0.4835	0.4012	0.1967
ENSG00000176890	TYMS	thymidylate synthetase [Source:HGNC Symbol;Acc:HGNC:12441]	0.2531	0.5824	0.2593	0.5864	-0.109	0.849
ENSG00000102780	DGKH	diacylglycerol kinase eta [Source:HGNC Symbol;Acc:HGNC:2854]	0.253	0.1891	0.257	0.2122	0.1441	0.5174
ENSG00000154727	GABPA	GA binding protein transcription factor subunit alpha [Source:HGNC Symbol;Acc:HGNC:4071]	0.253	0.1226	0.2558	0.145	0.2056	0.2405
ENSG00000163507	CIP2A	cell proliferation regulating inhibitor of protein phosphatase 2A [Source:HGNC Symbol;Acc:HGNC:29302]	0.253	0.4125	0.2533	0.4344	0.2629	0.4743
ENSG00000168228	ZCCHC4	zinc finger CCHC-type containing 4 [Source:HGNC Symbol;Acc:HGNC:22917]	0.2529	0.1433	0.2571	0.1701	0.1462	0.4567
ENSG00000174606	ANGEL2	angel homolog 2 [Source:HGNC Symbol;Acc:HGNC:30534]	0.2529	0.07202	0.255	0.08766	0.1788	0.2154
ENSG00000186063	AIDA	axin interactor, dorsalization associated [Source:HGNC Symbol;Acc:HGNC:25761]	0.2529	0.1471	0.2571	0.1746	0.1575	0.4212
ENSG00000005700	IBTK	inhibitor of Bruton tyrosine kinase [Source:HGNC Symbol;Acc:HGNC:17853]	0.2528	0.01774	0.2551	0.04121	0.221	0.04745
ENSG00000244754	N4BP2L2	NEDD4 binding protein 2 like 2 [Source:HGNC Symbol;Acc:HGNC:26916]	0.2528	0.07139	0.2543	0.08952	0.2319	0.1244
ENSG00000115137	DNAJC27	DnaJ heat shock protein family (Hsp40) member C27 [Source:HGNC Symbol;Acc:HGNC:30290]	0.2527	0.1771	0.2553	0.2164	0.2751	0.1919
ENSG00000107560	RAB11FIP2	RAB11 family interacting protein 2 [Source:HGNC Symbol;Acc:HGNC:29152]	0.2527	0.0459	0.2544	0.06961	0.2232	0.0992
ENSG00000113240	CLK4	CDC like kinase 4 [Source:HGNC Symbol;Acc:HGNC:13659]	0.2526	0.1205	0.2549	0.1504	0.2648	0.1302
ENSG00000177034	MTX3	metaxin 3 [Source:HGNC Symbol;Acc:HGNC:24812]	0.2526	0.1778	0.256	0.2085	0.1917	0.3663
ENSG00000115687	PASK	PAS domain containing serine/threonine kinase [Source:HGNC Symbol;Acc:HGNC:17270]	0.2523	0.07936	0.2537	0.1283	0.2442	0.1406
ENSG00000214595	EML6	EMAP like 6 [Source:HGNC Symbol;Acc:HGNC:35412]	0.2523	0.4256	0.2578	0.4541	0.2207	0.5182
ENSG00000171843	MLLT3	MLLT3 super elongation complex subunit [Source:HGNC Symbol;Acc:HGNC:7136]	0.2522	0.3932	0.2546	0.4129	0.3373	0.3344
ENSG00000153234	NR4A2	nuclear receptor subfamily 4 group A member 2 [Source:HGNC Symbol;Acc:HGNC:7981]	0.2521	0.4528	0.2534	0.4609	0.3189	0.4052
ENSG00000258890	CEP95	centrosomal protein 95 [Source:HGNC Symbol;Acc:HGNC:25141]	0.2519	0.1348	0.2555	0.1475	0.1779	0.3454
ENSG00000086289	EPDR1	ependymin related 1 [Source:HGNC Symbol;Acc:HGNC:17572]	0.2517	0.3611	0.2569	0.3802	0.2079	0.4946
ENSG00000139354	GAS2L3	growth arrest specific 2 like 3 [Source:HGNC Symbol;Acc:HGNC:27475]	0.2517	0.4257	0.2553	0.4445	0.3134	0.3961
ENSG00000237651	C2orf74	chromosome 2 open reading frame 74 [Source:HGNC Symbol;Acc:HGNC:34439]	0.2516	0.4578	0.2504	0.4789	0.05951	0.9016
ENSG00000134900	TPP2	tripeptidyl peptidase 2 [Source:HGNC Symbol;Acc:HGNC:12016]	0.2514	0.05933	0.2533	0.07836	0.2439	0.08548
ENSG00000153339	TRAPPC8	trafficking protein particle complex 8 [Source:HGNC Symbol;Acc:HGNC:29169]	0.2514	0.03798	0.2533	0.05851	0.2198	0.09169
ENSG00000134318	ROCK2	Rho associated coiled-coil containing protein kinase 2 [Source:HGNC Symbol;Acc:HGNC:10252]	0.2513	0.0113	0.2539	0.0322	0.2123	0.04984
ENSG00000261884		novel transcript	0.2513	0.2331	0.2552	0.2445	0.2568	0.2777
ENSG00000205302	SNX2	sorting nexin 2 [Source:HGNC Symbol;Acc:HGNC:11173]	0.2512	0.0361	0.2535	0.05616	0.2534	0.05553
ENSG00000129003	VPS13C	vacuolar protein sorting 13 homolog C [Source:HGNC Symbol;Acc:HGNC:23594]	0.2511	0.06086	0.2529	0.08339	0.2718	0.06282
ENSG00000132964	CDK8	cyclin dependent kinase 8 [Source:HGNC Symbol;Acc:HGNC:1779]	0.2511	0.02762	0.2594	0.06052	0.1669	0.1551
ENSG00000135241	PNPLA8	patatin like phospholipase domain containing 8 [Source:HGNC Symbol;Acc:HGNC:28900]	0.251	0.3418	0.253	0.3521	0.2541	0.3457
ENSG00000137713	PPP2R1B	protein phosphatase 2 scaffold subunit Abeta [Source:HGNC Symbol;Acc:HGNC:9303]	0.2509	0.1546	0.2541	0.1819	0.2073	0.2798
ENSG00000205659	LIN52	lin-52 DREAM MuvB core complex component [Source:HGNC Symbol;Acc:HGNC:19856]	0.2509	0.07907	0.2496	0.151	0.2417	0.1259
ENSG00000118482	PHF3	PHD finger protein 3 [Source:HGNC Symbol;Acc:HGNC:8921]	0.2508	0.0233	0.2518	0.04139	0.2529	0.05572
ENSG00000144635	DYNC1LI1	dynein cytoplasmic 1 light intermediate chain 1 [Source:HGNC Symbol;Acc:HGNC:18745]	0.2507	0.007096	0.2521	0.02681	0.2346	0.03006
ENSG00000119397	CNTRL	centriolin [Source:HGNC Symbol;Acc:HGNC:1858]	0.2507	0.01422	0.2525	0.0331	0.2355	0.04026
ENSG00000213047	DENND1B	DENN domain containing 1B [Source:HGNC Symbol;Acc:HGNC:28404]	0.2506	0.1153	0.2528	0.1416	0.1957	0.259
ENSG00000120341	SEC16B	SEC16 homolog B, endoplasmic reticulum export factor [Source:HGNC Symbol;Acc:HGNC:30301]	0.2505	0.07643	0.2475	0.1628	0.2299	0.155
ENSG00000124201	ZNFX1	zinc finger NFX1-type containing 1 [Source:HGNC Symbol;Acc:HGNC:29271]	0.2505	0.1826	0.2544	0.1924	0.2768	0.1608
ENSG00000133424	LARGE1	LARGE xylosyl- and glucuronyltransferase 1 [Source:HGNC Symbol;Acc:HGNC:6511]	0.2505	0.6804	0.2502	0.6906	0.1093	0.8775
ENSG00000286098		zinc finger protein 844 [Source:NCBI gene;Acc:284391]	0.2505	0.3427	0.2541	0.3525	0.2044	0.5144
ENSG00000112062	MAPK14	mitogen-activated protein kinase 14 [Source:HGNC Symbol;Acc:HGNC:6876]	0.2504	0.09255	0.251	0.1125	0.2979	0.06901
ENSG00000145388	METTL14	methyltransferase like 14 [Source:HGNC Symbol;Acc:HGNC:29330]	0.25	0.01288	0.2544	0.05508	0.2195	0.05564
ENSG00000172766	NAA16	N(alpha)-acetyltransferase 16, NatA auxiliary subunit [Source:HGNC Symbol;Acc:HGNC:26164]	0.25	0.1404	0.2537	0.1644	0.2306	0.2002
ENSG00000173559	NABP1	nucleic acid binding protein 1 [Source:HGNC Symbol;Acc:HGNC:26232]	0.2499	0.4359	0.2492	0.4443	0.1306	0.712
ENSG00000105321	CCDC9	coiled-coil domain containing 9 [Source:HGNC Symbol;Acc:HGNC:24560]	0.2498	0.3094	0.2528	0.3055	0.2654	0.3134
ENSG00000106346	USP42	ubiquitin specific peptidase 42 [Source:HGNC Symbol;Acc:HGNC:20068]	0.2497	0.05538	0.2532	0.08528	0.2233	0.1281
ENSG00000091164	TXNL1	thioredoxin like 1 [Source:HGNC Symbol;Acc:HGNC:12436]	0.2496	0.02143	0.2518	0.04345	0.2218	0.05006
ENSG00000162849	KIF26B	kinesin family member 26B [Source:HGNC Symbol;Acc:HGNC:25484]	0.2496	0.5926	0.255	0.6159	0.2345	0.6628
ENSG00000188419	CHM	CHM Rab escort protein [Source:HGNC Symbol;Acc:HGNC:1940]	0.2496	0.1186	0.2523	0.1592	0.2082	0.2259
ENSG00000144559	TAMM41	TAM41 mitochondrial translocator assembly and maintenance homolog [Source:HGNC Symbol;Acc:HGNC:25187]	0.2495	0.07364	0.2557	0.1155	0.1653	0.322
ENSG00000174032	SLC25A30	solute carrier family 25 member 30 [Source:HGNC Symbol;Acc:HGNC:27371]	0.2494	0.0574	0.2496	0.09894	0.2493	0.09109
ENSG00000178104	PDE4DIP	phosphodiesterase 4D interacting protein [Source:HGNC Symbol;Acc:HGNC:15580]	0.2493	0.1865	0.2511	0.2124	0.1731	0.4543
ENSG00000151876	FBXO4	F-box protein 4 [Source:HGNC Symbol;Acc:HGNC:13583]	0.2491	0.1487	0.2485	0.2193	0.2741	0.1677
ENSG00000152749	GPR180	G protein-coupled receptor 180 [Source:HGNC Symbol;Acc:HGNC:28899]	0.2489	0.2674	0.2488	0.3006	0.2314	0.3797
ENSG00000107938	EDRF1	erythroid differentiation regulatory factor 1 [Source:HGNC Symbol;Acc:HGNC:24640]	0.2484	0.02538	0.2505	0.05257	0.2389	0.0453
ENSG00000178127	NDUFV2	NADH:ubiquinone oxidoreductase core subunit V2 [Source:HGNC Symbol;Acc:HGNC:7717]	0.2484	0.178	0.2512	0.1872	0.2271	0.2396
ENSG00000106086	PLEKHA8	pleckstrin homology domain containing A8 [Source:HGNC Symbol;Acc:HGNC:30037]	0.2482	0.04254	0.252	0.0845	0.1882	0.1714
ENSG00000148925	BTBD10	BTB domain containing 10 [Source:HGNC Symbol;Acc:HGNC:21445]	0.2478	0.04357	0.2524	0.08322	0.2032	0.1396
ENSG00000148926	ADM	adrenomedullin [Source:HGNC Symbol;Acc:HGNC:259]	0.2478	0.4349	0.2457	0.4659	0.1849	0.6376
ENSG00000178567	EPM2AIP1	EPM2A interacting protein 1 [Source:HGNC Symbol;Acc:HGNC:19735]	0.2475	0.04156	0.249	0.07597	0.2434	0.06777
ENSG00000140396	NCOA2	nuclear receptor coactivator 2 [Source:HGNC Symbol;Acc:HGNC:7669]	0.2473	0.02404	0.2495	0.04695	0.2793	0.0188
ENSG00000154781	CCDC174	coiled-coil domain containing 174 [Source:HGNC Symbol;Acc:HGNC:28033]	0.2473	0.02497	0.2477	0.06053	0.2601	0.04499
ENSG00000100445	SDR39U1	short chain dehydrogenase/reductase family 39U member 1 [Source:HGNC Symbol;Acc:HGNC:20275]	0.2472	0.1402	0.2511	0.178	0.2092	0.2685
ENSG00000065548	ZC3H15	zinc finger CCCH-type containing 15 [Source:HGNC Symbol;Acc:HGNC:29528]	0.247	0.05304	0.2493	0.07322	0.2347	0.0769
ENSG00000087338	GMCL1	germ cell-less 1, spermatogenesis associated [Source:HGNC Symbol;Acc:HGNC:23843]	0.247	0.05527	0.25	0.09829	0.2034	0.1611
ENSG00000100596	SPTLC2	serine palmitoyltransferase long chain base subunit 2 [Source:HGNC Symbol;Acc:HGNC:11278]	0.2469	0.087	0.2472	0.1074	0.2555	0.09054
ENSG00000196646	ZNF136	zinc finger protein 136 [Source:HGNC Symbol;Acc:HGNC:12920]	0.2468	0.2745	0.2516	0.294	0.2267	0.3764
ENSG00000104133	SPG11	SPG11 vesicle trafficking associated, spatacsin [Source:HGNC Symbol;Acc:HGNC:11226]	0.2466	0.006635	0.2492	0.02432	0.2322	0.01669
ENSG00000104756	KCTD9	potassium channel tetramerization domain containing 9 [Source:HGNC Symbol;Acc:HGNC:22401]	0.2464	0.1752	0.2501	0.2014	0.183	0.3591
ENSG00000118690	ARMC2	armadillo repeat containing 2 [Source:HGNC Symbol;Acc:HGNC:23045]	0.2464	0.06497	0.2466	0.1172	0.2427	0.09744
ENSG00000083937	CHMP2B	charged multivesicular body protein 2B [Source:HGNC Symbol;Acc:HGNC:24537]	0.2463	0.06319	0.2472	0.08762	0.2246	0.1079
ENSG00000242247	ARFGAP3	ADP ribosylation factor GTPase activating protein 3 [Source:HGNC Symbol;Acc:HGNC:661]	0.2463	0.2545	0.2509	0.2527	0.2349	0.297
ENSG00000136048	DRAM1	DNA damage regulated autophagy modulator 1 [Source:HGNC Symbol;Acc:HGNC:25645]	0.2462	0.09015	0.2467	0.1056	0.2163	0.1757
ENSG00000046651	OFD1	OFD1 centriole and centriolar satellite protein [Source:HGNC Symbol;Acc:HGNC:2567]	0.2461	0.07777	0.2511	0.1136	0.1779	0.2267
ENSG00000128881	TTBK2	tau tubulin kinase 2 [Source:HGNC Symbol;Acc:HGNC:19141]	0.2461	0.02155	0.2473	0.04319	0.2622	0.02876
ENSG00000174718	RESF1	retroelement silencing factor 1 [Source:HGNC Symbol;Acc:HGNC:25559]	0.246	0.07631	0.2459	0.09541	0.2526	0.109
ENSG00000102531	FNDC3A	fibronectin type III domain containing 3A [Source:HGNC Symbol;Acc:HGNC:20296]	0.2459	0.05988	0.2467	0.07849	0.2094	0.1048
ENSG00000124523	SIRT5	sirtuin 5 [Source:HGNC Symbol;Acc:HGNC:14933]	0.2458	0.08735	0.2439	0.1524	0.2471	0.1251
ENSG00000147650	LRP12	LDL receptor related protein 12 [Source:HGNC Symbol;Acc:HGNC:31708]	0.2458	0.3978	0.2475	0.4186	0.1717	0.6555
ENSG00000120688	WBP4	WW domain binding protein 4 [Source:HGNC Symbol;Acc:HGNC:12739]	0.2457	0.1366	0.2498	0.1687	0.1944	0.272
ENSG00000135899	SP110	SP110 nuclear body protein [Source:HGNC Symbol;Acc:HGNC:5401]	0.2456	0.1991	0.2463	0.2063	0.1796	0.3871
ENSG00000023516	AKAP11	A-kinase anchoring protein 11 [Source:HGNC Symbol;Acc:HGNC:369]	0.2456	0.02106	0.2488	0.0483	0.1912	0.1118
ENSG00000117569	PTBP2	polypyrimidine tract binding protein 2 [Source:HGNC Symbol;Acc:HGNC:17662]	0.2455	0.2771	0.2465	0.2897	0.1927	0.416
ENSG00000175155	YPEL2	yippee like 2 [Source:HGNC Symbol;Acc:HGNC:18326]	0.2455	0.08005	0.2466	0.09897	0.2424	0.1378
ENSG00000133026	MYH10	myosin heavy chain 10 [Source:HGNC Symbol;Acc:HGNC:7568]	0.2454	0.2167	0.2471	0.2455	0.2298	0.3445
ENSG00000104497	SNX16	sorting nexin 16 [Source:HGNC Symbol;Acc:HGNC:14980]	0.2452	0.08736	0.2445	0.1492	0.2533	0.1266
ENSG00000143458	GABPB2	GA binding protein transcription factor subunit beta 2 [Source:HGNC Symbol;Acc:HGNC:28441]	0.2451	0.08225	0.2485	0.1172	0.2102	0.1463
ENSG00000162650	ATXN7L2	ataxin 7 like 2 [Source:HGNC Symbol;Acc:HGNC:28713]	0.2451	0.1106	0.2466	0.1533	0.2389	0.1892
ENSG00000066651	TRMT11	tRNA methyltransferase 11 homolog [Source:HGNC Symbol;Acc:HGNC:21080]	0.245	0.08887	0.254	0.1375	0.1659	0.3144
ENSG00000127995	CASD1	CAS1 domain containing 1 [Source:HGNC Symbol;Acc:HGNC:16014]	0.245	0.2744	0.2568	0.3189	0.1224	0.6576
ENSG00000164654	MIOS	meiosis regulator for oocyte development [Source:HGNC Symbol;Acc:HGNC:21905]	0.2449	0.1349	0.2462	0.1502	0.1641	0.3352
ENSG00000090989	EXOC1	exocyst complex component 1 [Source:HGNC Symbol;Acc:HGNC:30380]	0.2444	0.06762	0.246	0.0912	0.2005	0.1385
ENSG00000198692	EIF1AY	eukaryotic translation initiation factor 1A Y-linked [Source:HGNC Symbol;Acc:HGNC:3252]	0.2444	0.8158	0.2463	0.8062	1.19	0.4632
ENSG00000232810	TNF	tumor necrosis factor [Source:HGNC Symbol;Acc:HGNC:11892]	0.2444	0.4088	0.2482	0.415	0.2847	0.4016
ENSG00000085224	ATRX	ATRX chromatin remodeler [Source:HGNC Symbol;Acc:HGNC:886]	0.2443	0.05731	0.2467	0.0783	0.241	0.05889
ENSG00000137216	TMEM63B	transmembrane protein 63B [Source:HGNC Symbol;Acc:HGNC:17735]	0.2443	0.1325	0.2484	0.154	0.2189	0.1882
ENSG00000196074	SYCP2	synaptonemal complex protein 2 [Source:HGNC Symbol;Acc:HGNC:11490]	0.2443	0.4456	0.2449	0.4689	0.386	0.2646
ENSG00000173198	CYSLTR1	cysteinyl leukotriene receptor 1 [Source:HGNC Symbol;Acc:HGNC:17451]	0.2442	0.3829	0.2436	0.3992	0.1802	0.6136
ENSG00000077254	USP33	ubiquitin specific peptidase 33 [Source:HGNC Symbol;Acc:HGNC:20059]	0.2441	0.03909	0.2458	0.05766	0.2149	0.09153
ENSG00000150593	PDCD4	programmed cell death 4 [Source:HGNC Symbol;Acc:HGNC:8763]	0.2441	0.09644	0.2457	0.1098	0.2421	0.1108
ENSG00000136541	ERMN	ermin [Source:HGNC Symbol;Acc:HGNC:29208]	0.2439	0.4027	0.2458	0.4028	0.1969	0.5988
ENSG00000139132	FGD4	FYVE, RhoGEF and PH domain containing 4 [Source:HGNC Symbol;Acc:HGNC:19125]	0.2439	0.3371	0.2454	0.3459	0.2798	0.2689
ENSG00000135336	ORC3	origin recognition complex subunit 3 [Source:HGNC Symbol;Acc:HGNC:8489]	0.2438	0.03755	0.2465	0.09819	0.2128	0.09848
ENSG00000151779	NBAS	NBAS subunit of NRZ tethering complex [Source:HGNC Symbol;Acc:HGNC:15625]	0.2437	0.03903	0.2465	0.06722	0.2107	0.08143
ENSG00000270106	TSNAX-DISC1	TSNAX-DISC1 readthrough (NMD candidate) [Source:HGNC Symbol;Acc:HGNC:49177]	0.2437	0.3397	0.2523	0.4028	0.2155	0.4543
ENSG00000072756	TRNT1	tRNA nucleotidyl transferase 1 [Source:HGNC Symbol;Acc:HGNC:17341]	0.2435	0.1197	0.2474	0.1641	0.163	0.3638
ENSG00000221994	ZNF630	zinc finger protein 630 [Source:HGNC Symbol;Acc:HGNC:28855]	0.2433	0.4398	0.2419	0.4958	0.4076	0.2348
ENSG00000102218	RP2	RP2 activator of ARL3 GTPase [Source:HGNC Symbol;Acc:HGNC:10274]	0.2432	0.0706	0.246	0.09297	0.2433	0.08083
ENSG00000138119	MYOF	myoferlin [Source:HGNC Symbol;Acc:HGNC:3656]	0.2432	0.3939	0.2433	0.3977	0.2459	0.4285
ENSG00000092108	SCFD1	sec1 family domain containing 1 [Source:HGNC Symbol;Acc:HGNC:20726]	0.2431	0.2159	0.2457	0.2188	0.1961	0.3266
ENSG00000109689	STIM2	stromal interaction molecule 2 [Source:HGNC Symbol;Acc:HGNC:19205]	0.243	0.09418	0.2446	0.1146	0.2053	0.1716
ENSG00000117479	SLC19A2	solute carrier family 19 member 2 [Source:HGNC Symbol;Acc:HGNC:10938]	0.2428	0.3694	0.2453	0.3761	0.1594	0.5961
ENSG00000139190	VAMP1	vesicle associated membrane protein 1 [Source:HGNC Symbol;Acc:HGNC:12642]	0.2428	0.227	0.2462	0.2522	0.1859	0.3675
ENSG00000122729	ACO1	aconitase 1 [Source:HGNC Symbol;Acc:HGNC:117]	0.2426	0.1455	0.2438	0.1834	0.185	0.3458
ENSG00000178460	MCMDC2	minichromosome maintenance domain containing 2 [Source:HGNC Symbol;Acc:HGNC:26368]	0.2426	0.3633	0.2428	0.3897	0.2282	0.4902
ENSG00000082898	XPO1	exportin 1 [Source:HGNC Symbol;Acc:HGNC:12825]	0.2424	0.07264	0.2444	0.0945	0.2048	0.1824
ENSG00000004468	CD38	CD38 molecule [Source:HGNC Symbol;Acc:HGNC:1667]	0.2423	0.4519	0.2412	0.4585	-0.007056	0.9872
ENSG00000138688	KIAA1109	KIAA1109 [Source:HGNC Symbol;Acc:HGNC:26953]	0.2422	0.02936	0.2437	0.05418	0.2788	0.02484
ENSG00000144744	UBA3	ubiquitin like modifier activating enzyme 3 [Source:HGNC Symbol;Acc:HGNC:12470]	0.2421	0.04369	0.2438	0.0636	0.2294	0.08083
ENSG00000158555	GDPD5	glycerophosphodiester phosphodiesterase domain containing 5 [Source:HGNC Symbol;Acc:HGNC:28804]	0.2421	0.1777	0.2414	0.1835	0.1442	0.4538
ENSG00000085274	MYNN	myoneurin [Source:HGNC Symbol;Acc:HGNC:14955]	0.2418	0.03522	0.2455	0.08115	0.2197	0.0917
ENSG00000081320	STK17B	serine/threonine kinase 17b [Source:HGNC Symbol;Acc:HGNC:11396]	0.2417	0.2033	0.2422	0.2189	0.3117	0.1295
ENSG00000132356	PRKAA1	protein kinase AMP-activated catalytic subunit alpha 1 [Source:HGNC Symbol;Acc:HGNC:9376]	0.2417	0.05438	0.2434	0.07813	0.2295	0.08746
ENSG00000134242	PTPN22	protein tyrosine phosphatase non-receptor type 22 [Source:HGNC Symbol;Acc:HGNC:9652]	0.2417	0.2909	0.2431	0.311	0.239	0.3648
ENSG00000139344	AMDHD1	amidohydrolase domain containing 1 [Source:HGNC Symbol;Acc:HGNC:28577]	0.2415	0.4676	0.2454	0.5058	0.1628	0.6891
ENSG00000174749	FAM241A	family with sequence similarity 241 member A [Source:HGNC Symbol;Acc:HGNC:26813]	0.2415	0.1425	0.2422	0.1707	0.1364	0.4538
ENSG00000189079	ARID2	AT-rich interaction domain 2 [Source:HGNC Symbol;Acc:HGNC:18037]	0.2415	0.1176	0.244	0.1307	0.238	0.1279
ENSG00000117226	GBP3	guanylate binding protein 3 [Source:HGNC Symbol;Acc:HGNC:4184]	0.2414	0.2396	0.2433	0.2627	0.2813	0.2225
ENSG00000151413	NUBPL	nucleotide binding protein like [Source:HGNC Symbol;Acc:HGNC:20278]	0.2413	0.2265	0.2448	0.2672	0.1798	0.4117
ENSG00000179299	NSUN7	NOP2/Sun RNA methyltransferase family member 7 [Source:HGNC Symbol;Acc:HGNC:25857]	0.2411	0.4789	0.2378	0.5095	0.1918	0.6228
ENSG00000128039	SRD5A3	steroid 5 alpha-reductase 3 [Source:HGNC Symbol;Acc:HGNC:25812]	0.2408	0.1998	0.2394	0.2297	0.1313	0.5576
ENSG00000140386	SCAPER	S-phase cyclin A associated protein in the ER [Source:HGNC Symbol;Acc:HGNC:13081]	0.2407	0.08747	0.2435	0.1227	0.2162	0.1557
ENSG00000132294	EFR3A	EFR3 homolog A [Source:HGNC Symbol;Acc:HGNC:28970]	0.2406	0.1347	0.2424	0.1521	0.2267	0.1567
ENSG00000131263	RLIM	ring finger protein, LIM domain interacting [Source:HGNC Symbol;Acc:HGNC:13429]	0.2404	0.2861	0.2436	0.2888	0.2434	0.3007
ENSG00000198121	LPAR1	lysophosphatidic acid receptor 1 [Source:HGNC Symbol;Acc:HGNC:3166]	0.2404	0.2194	0.2393	0.2367	0.1613	0.4875
ENSG00000112941	TENT4A	terminal nucleotidyltransferase 4A [Source:HGNC Symbol;Acc:HGNC:16705]	0.2403	0.2069	0.2444	0.2106	0.2458	0.2045
ENSG00000097033	SH3GLB1	SH3 domain containing GRB2 like, endophilin B1 [Source:HGNC Symbol;Acc:HGNC:10833]	0.2403	0.02463	0.2414	0.04687	0.2396	0.03142
ENSG00000158615	PPP1R15B	protein phosphatase 1 regulatory subunit 15B [Source:HGNC Symbol;Acc:HGNC:14951]	0.2403	0.109	0.2417	0.1327	0.2807	0.08975
ENSG00000163811	WDR43	WD repeat domain 43 [Source:HGNC Symbol;Acc:HGNC:28945]	0.2401	0.23	0.2432	0.2343	0.2329	0.2577
ENSG00000131437	KIF3A	kinesin family member 3A [Source:HGNC Symbol;Acc:HGNC:6319]	0.2399	0.2415	0.2415	0.365	0.2095	0.4043
ENSG00000149636	DSN1	DSN1 component of MIS12 kinetochore complex [Source:HGNC Symbol;Acc:HGNC:16165]	0.2398	0.1173	0.2431	0.1773	0.2074	0.2162
ENSG00000089123	TASP1	taspase 1 [Source:HGNC Symbol;Acc:HGNC:15859]	0.2397	0.0943	0.2455	0.1436	0.1718	0.2777
ENSG00000145391	SETD7	SET domain containing 7, histone lysine methyltransferase [Source:HGNC Symbol;Acc:HGNC:30412]	0.2397	0.02757	0.2423	0.04687	0.2353	0.05294
ENSG00000120662	MTRF1	mitochondrial translation release factor 1 [Source:HGNC Symbol;Acc:HGNC:7469]	0.2397	0.03274	0.2392	0.09708	0.2016	0.1056
ENSG00000198890	PRMT6	protein arginine methyltransferase 6 [Source:HGNC Symbol;Acc:HGNC:18241]	0.2395	0.4604	0.2378	0.4933	0.2626	0.4937
ENSG00000159202	UBE2Z	ubiquitin conjugating enzyme E2 Z [Source:HGNC Symbol;Acc:HGNC:25847]	0.2392	0.1064	0.2424	0.1216	0.2358	0.1292
ENSG00000101040	ZMYND8	zinc finger MYND-type containing 8 [Source:HGNC Symbol;Acc:HGNC:9397]	0.2391	0.1674	0.2415	0.1865	0.2093	0.2353
ENSG00000164611	PTTG1	PTTG1 regulator of sister chromatid separation, securin [Source:HGNC Symbol;Acc:HGNC:9690]	0.2391	0.3721	0.2391	0.4298	0.2907	0.3584
ENSG00000164603	BMT2	base methyltransferase of 25S rRNA 2 homolog [Source:HGNC Symbol;Acc:HGNC:26475]	0.2389	0.1102	0.2395	0.1584	0.2233	0.1635
ENSG00000165813	CCDC186	coiled-coil domain containing 186 [Source:HGNC Symbol;Acc:HGNC:24349]	0.2389	0.25	0.2417	0.265	0.1981	0.3792
ENSG00000171100	MTM1	myotubularin 1 [Source:HGNC Symbol;Acc:HGNC:7448]	0.2388	0.004364	0.2401	0.02829	0.2133	0.03169
ENSG00000186153	WWOX	WW domain containing oxidoreductase [Source:HGNC Symbol;Acc:HGNC:12799]	0.2388	0.03218	0.2468	0.07255	0.1473	0.2096
ENSG00000163635	ATXN7	ataxin 7 [Source:HGNC Symbol;Acc:HGNC:10560]	0.2387	0.0295	0.2404	0.0506	0.2383	0.03066
ENSG00000126775	ATG14	autophagy related 14 [Source:HGNC Symbol;Acc:HGNC:19962]	0.2385	0.09152	0.2415	0.112	0.1921	0.1922
ENSG00000170006	TMEM154	transmembrane protein 154 [Source:HGNC Symbol;Acc:HGNC:26489]	0.2384	0.14	0.2382	0.1583	0.2621	0.168
ENSG00000139597	N4BP2L1	NEDD4 binding protein 2 like 1 [Source:HGNC Symbol;Acc:HGNC:25037]	0.2381	0.06315	0.2397	0.08164	0.1898	0.1765
ENSG00000108306	FBXL20	F-box and leucine rich repeat protein 20 [Source:HGNC Symbol;Acc:HGNC:24679]	0.2379	0.05561	0.2407	0.08008	0.1977	0.1378
ENSG00000139974	SLC38A6	solute carrier family 38 member 6 [Source:HGNC Symbol;Acc:HGNC:19863]	0.2379	0.0931	0.2398	0.1416	0.2061	0.1728
ENSG00000163577	EIF5A2	eukaryotic translation initiation factor 5A2 [Source:HGNC Symbol;Acc:HGNC:3301]	0.2378	0.5044	0.2433	0.5221	0.2727	0.508
ENSG00000197776	KLHDC1	kelch domain containing 1 [Source:HGNC Symbol;Acc:HGNC:19836]	0.2378	0.3092	0.2418	0.3307	0.1305	0.6424
ENSG00000067646	ZFY	zinc finger protein Y-linked [Source:HGNC Symbol;Acc:HGNC:12870]	0.2376	0.8348	0.2419	0.8236	1.138	0.5256
ENSG00000112031	MTRF1L	mitochondrial translational release factor 1 like [Source:HGNC Symbol;Acc:HGNC:21051]	0.2373	0.02667	0.2392	0.0755	0.2265	0.08233
ENSG00000136937	NCBP1	nuclear cap binding protein subunit 1 [Source:HGNC Symbol;Acc:HGNC:7658]	0.2372	0.1528	0.2399	0.1697	0.2043	0.2248
ENSG00000175110	MRPS22	mitochondrial ribosomal protein S22 [Source:HGNC Symbol;Acc:HGNC:14508]	0.2372	0.00855	0.2369	0.04139	0.2403	0.02025
ENSG00000109323	MANBA	mannosidase beta [Source:HGNC Symbol;Acc:HGNC:6831]	0.2371	0.002295	0.2388	0.01927	0.2822	0.007773
ENSG00000173369	C1QB	complement C1q B chain [Source:HGNC Symbol;Acc:HGNC:1242]	0.2371	0.6905	0.242	0.6762	0.3172	0.6406
ENSG00000124942	AHNAK	AHNAK nucleoprotein [Source:HGNC Symbol;Acc:HGNC:347]	0.2369	0.214	0.2423	0.2145	0.3676	0.1246
ENSG00000145734	BDP1	B double prime 1, subunit of RNA polymerase III transcription initiation factor IIIB [Source:HGNC Symbol;Acc:HGNC:13652]	0.2369	0.06271	0.239	0.08538	0.2283	0.07248
ENSG00000197779	ZNF81	zinc finger protein 81 [Source:HGNC Symbol;Acc:HGNC:13156]	0.2367	0.08046	0.2396	0.1205	0.2049	0.1617
ENSG00000138061	CYP1B1	cytochrome P450 family 1 subfamily B member 1 [Source:HGNC Symbol;Acc:HGNC:2597]	0.2366	0.5517	0.2313	0.5311	0.1846	0.6622
ENSG00000178795	GDPD4	glycerophosphodiester phosphodiesterase domain containing 4 [Source:HGNC Symbol;Acc:HGNC:24849]	0.2365	0.593	0.2425	0.6039	0.0742	0.8961
ENSG00000137502	RAB30	RAB30, member RAS oncogene family [Source:HGNC Symbol;Acc:HGNC:9770]	0.2363	0.553	0.243	0.5697	-0.004365	0.9944
ENSG00000203667	COX20	cytochrome c oxidase assembly factor COX20 [Source:HGNC Symbol;Acc:HGNC:26970]	0.2363	0.1684	0.2423	0.199	0.1075	0.5811
ENSG00000151611	MMAA	metabolism of cobalamin associated A [Source:HGNC Symbol;Acc:HGNC:18871]	0.2361	0.1071	0.2376	0.1671	0.2253	0.1932
ENSG00000049883	PTCD2	pentatricopeptide repeat domain 2 [Source:HGNC Symbol;Acc:HGNC:25734]	0.2359	0.2508	0.2368	0.2958	0.2183	0.3538
ENSG00000174514	MFSD4A	major facilitator superfamily domain containing 4A [Source:HGNC Symbol;Acc:HGNC:25433]	0.2359	0.3462	0.2354	0.3977	0.3012	0.2986
ENSG00000104081	BMF	Bcl2 modifying factor [Source:HGNC Symbol;Acc:HGNC:24132]	0.2358	0.3288	0.2388	0.332	0.286	0.29
ENSG00000138468	SENP7	SUMO specific peptidase 7 [Source:HGNC Symbol;Acc:HGNC:30402]	0.2357	0.1319	0.2374	0.1519	0.1856	0.2748
ENSG00000173214	MFSD4B	major facilitator superfamily domain containing 4B [Source:HGNC Symbol;Acc:HGNC:21053]	0.2357	0.1024	0.2364	0.1695	0.2146	0.1797
ENSG00000101751	POLI	DNA polymerase iota [Source:HGNC Symbol;Acc:HGNC:9182]	0.2356	0.1625	0.2379	0.1874	0.1796	0.3264
ENSG00000147526	TACC1	transforming acidic coiled-coil containing protein 1 [Source:HGNC Symbol;Acc:HGNC:11522]	0.2354	0.03519	0.238	0.06355	0.2785	0.03169
ENSG00000145781	COMMD10	COMM domain containing 10 [Source:HGNC Symbol;Acc:HGNC:30201]	0.2353	0.1155	0.2379	0.1412	0.2195	0.1378
ENSG00000187193	MT1X	metallothionein 1X [Source:HGNC Symbol;Acc:HGNC:7405]	0.2353	0.3534	0.2339	0.386	0.2628	0.365
ENSG00000020426	MNAT1	MNAT1 component of CDK activating kinase [Source:HGNC Symbol;Acc:HGNC:7181]	0.2352	0.1481	0.2417	0.21	0.1858	0.325
ENSG00000160325	CACFD1	calcium channel flower domain containing 1 [Source:HGNC Symbol;Acc:HGNC:1365]	0.2352	0.2119	0.2382	0.2394	0.2775	0.1691
ENSG00000197713	RPE	ribulose-5-phosphate-3-epimerase [Source:HGNC Symbol;Acc:HGNC:10293]	0.2352	0.1015	0.2375	0.1554	0.205	0.1842
ENSG00000146707	POMZP3	POM121 and ZP3 fusion [Source:HGNC Symbol;Acc:HGNC:9203]	0.2351	0.1718	0.2375	0.211	0.2067	0.3038
ENSG00000132122	SPATA6	spermatogenesis associated 6 [Source:HGNC Symbol;Acc:HGNC:18309]	0.2349	0.2716	0.2383	0.289	0.2085	0.3787
ENSG00000111727	HCFC2	host cell factor C2 [Source:HGNC Symbol;Acc:HGNC:24972]	0.2346	0.03833	0.2375	0.09281	0.2058	0.1123
ENSG00000142794	NBPF3	NBPF member 3 [Source:HGNC Symbol;Acc:HGNC:25076]	0.2346	0.585	0.2382	0.5865	0.4897	0.4493
ENSG00000196428	TSC22D2	TSC22 domain family member 2 [Source:HGNC Symbol;Acc:HGNC:29095]	0.2346	0.2106	0.2386	0.2219	0.2677	0.1731
ENSG00000134375	TIMM17A	translocase of inner mitochondrial membrane 17A [Source:HGNC Symbol;Acc:HGNC:17315]	0.2345	0.0839	0.2372	0.09959	0.1721	0.2074
ENSG00000144550	CPNE9	copine family member 9 [Source:HGNC Symbol;Acc:HGNC:24336]	0.2344	0.4912	0.2388	0.5221	0.1689	0.6895
ENSG00000197170	PSMD12	proteasome 26S subunit, non-ATPase 12 [Source:HGNC Symbol;Acc:HGNC:9557]	0.2344	0.2588	0.2377	0.2624	0.2159	0.3313
ENSG00000014123	UFL1	UFM1 specific ligase 1 [Source:HGNC Symbol;Acc:HGNC:23039]	0.2342	0.1232	0.2363	0.1498	0.1716	0.2901
ENSG00000047621	C12orf4	chromosome 12 open reading frame 4 [Source:HGNC Symbol;Acc:HGNC:1184]	0.2342	0.1167	0.2356	0.1683	0.2296	0.1496
ENSG00000119446	RBM18	RNA binding motif protein 18 [Source:HGNC Symbol;Acc:HGNC:28413]	0.2342	0.008117	0.2358	0.03752	0.216	0.0404
ENSG00000103522	IL21R	interleukin 21 receptor [Source:HGNC Symbol;Acc:HGNC:6006]	0.2339	0.5291	0.2315	0.5328	0.06031	0.8971
ENSG00000258461		novel transcript	0.2339	0.389	0.2403	0.4199	0.1619	0.6195
ENSG00000174891	RSRC1	arginine and serine rich coiled-coil 1 [Source:HGNC Symbol;Acc:HGNC:24152]	0.2338	0.2221	0.2356	0.2395	0.1152	0.5641
ENSG00000116539	ASH1L	ASH1 like histone lysine methyltransferase [Source:HGNC Symbol;Acc:HGNC:19088]	0.2334	0.06744	0.236	0.09276	0.2344	0.08254
ENSG00000164975	SNAPC3	small nuclear RNA activating complex polypeptide 3 [Source:HGNC Symbol;Acc:HGNC:11136]	0.2334	0.204	0.2338	0.2284	0.1678	0.418
ENSG00000175073	VCPIP1	valosin containing protein interacting protein 1 [Source:HGNC Symbol;Acc:HGNC:30897]	0.2333	0.07536	0.2335	0.09782	0.2383	0.1029
ENSG00000155085	AK9	adenylate kinase 9 [Source:HGNC Symbol;Acc:HGNC:33814]	0.233	0.1031	0.2386	0.1644	0.1651	0.3009
ENSG00000155275	TRMT44	tRNA methyltransferase 44 homolog [Source:HGNC Symbol;Acc:HGNC:26653]	0.233	0.09916	0.2371	0.1348	0.1434	0.3592
ENSG00000155749	FLACC1	flagellum associated containing coiled-coil domains 1 [Source:HGNC Symbol;Acc:HGNC:14439]	0.233	0.3075	0.2364	0.3451	0.2622	0.2807
ENSG00000174720	LARP7	La ribonucleoprotein 7, transcriptional regulator [Source:HGNC Symbol;Acc:HGNC:24912]	0.2329	0.01665	0.2349	0.04367	0.2125	0.04984
ENSG00000128335	APOL2	apolipoprotein L2 [Source:HGNC Symbol;Acc:HGNC:619]	0.2328	0.2411	0.2345	0.2484	0.2732	0.2102
ENSG00000172007	RAB33B	RAB33B, member RAS oncogene family [Source:HGNC Symbol;Acc:HGNC:16075]	0.2327	0.113	0.2314	0.1669	0.2275	0.1784
ENSG00000137871	ZNF280D	zinc finger protein 280D [Source:HGNC Symbol;Acc:HGNC:25953]	0.2326	0.1537	0.2362	0.1927	0.1554	0.4145
ENSG00000170260	ZNF212	zinc finger protein 212 [Source:HGNC Symbol;Acc:HGNC:13004]	0.2326	0.1321	0.2359	0.1583	0.1808	0.2691
ENSG00000112282	MED23	mediator complex subunit 23 [Source:HGNC Symbol;Acc:HGNC:2372]	0.2325	0.1379	0.2349	0.1557	0.213	0.1947
ENSG00000135636	DYSF	dysferlin [Source:HGNC Symbol;Acc:HGNC:3097]	0.2325	0.3348	0.2309	0.3432	0.2698	0.2908
ENSG00000198690	FAN1	FANCD2 and FANCI associated nuclease 1 [Source:HGNC Symbol;Acc:HGNC:29170]	0.2325	0.07358	0.2354	0.09545	0.1843	0.2096
ENSG00000120162	MOB3B	MOB kinase activator 3B [Source:HGNC Symbol;Acc:HGNC:23825]	0.2324	0.09861	0.2333	0.1489	0.2469	0.1232
ENSG00000177646	ACAD9	acyl-CoA dehydrogenase family member 9 [Source:HGNC Symbol;Acc:HGNC:21497]	0.2322	0.1331	0.2324	0.1584	0.05943	0.7183
ENSG00000001084	GCLC	glutamate-cysteine ligase catalytic subunit [Source:HGNC Symbol;Acc:HGNC:4311]	0.232	0.05476	0.2315	0.09281	0.2501	0.07275
ENSG00000196550	FAM72A	family with sequence similarity 72 member A [Source:HGNC Symbol;Acc:HGNC:24044]	0.232	0.5007	0.2379	0.4992	0.28	0.4533
ENSG00000163539	CLASP2	cytoplasmic linker associated protein 2 [Source:HGNC Symbol;Acc:HGNC:17078]	0.2319	0.1712	0.2343	0.1836	0.2021	0.2491
ENSG00000063587	ZNF275	zinc finger protein 275 [Source:HGNC Symbol;Acc:HGNC:13069]	0.2318	0.1106	0.2346	0.1493	0.2189	0.1488
ENSG00000188343	FAM92A	family with sequence similarity 92 member A [Source:HGNC Symbol;Acc:HGNC:30452]	0.2318	0.3781	0.2352	0.4136	0.1693	0.5904
ENSG00000135083	CCNJL	cyclin J like [Source:HGNC Symbol;Acc:HGNC:25876]	0.2316	0.561	0.2342	0.6253	0.1205	0.7742
ENSG00000180425	C11orf71	chromosome 11 open reading frame 71 [Source:HGNC Symbol;Acc:HGNC:25937]	0.2315	0.2674	0.2366	0.3296	0.1519	0.5292
ENSG00000021776	AQR	aquarius intron-binding spliceosomal factor [Source:HGNC Symbol;Acc:HGNC:29513]	0.2314	0.06191	0.2334	0.08684	0.2025	0.1002
ENSG00000103550	KNOP1	lysine rich nucleolar protein 1 [Source:HGNC Symbol;Acc:HGNC:34404]	0.2314	0.3181	0.2377	0.3842	0.1193	0.6691
ENSG00000166266	CUL5	cullin 5 [Source:HGNC Symbol;Acc:HGNC:2556]	0.2313	0.1304	0.2339	0.1486	0.2184	0.1598
ENSG00000116830	TTF2	transcription termination factor 2 [Source:HGNC Symbol;Acc:HGNC:12398]	0.231	0.01894	0.2344	0.06553	0.19	0.09744
ENSG00000179593	ALOX15B	arachidonate 15-lipoxygenase type B [Source:HGNC Symbol;Acc:HGNC:434]	0.2309	0.5895	0.2275	0.6038	0.3381	0.4496
ENSG00000165078	CPA6	carboxypeptidase A6 [Source:HGNC Symbol;Acc:HGNC:17245]	0.2308	0.5738	0.2347	0.5894	0.2943	0.5045
ENSG00000205707	ETFRF1	electron transfer flavoprotein regulatory factor 1 [Source:HGNC Symbol;Acc:HGNC:27052]	0.2307	0.2314	0.2338	0.2642	0.1923	0.3777
ENSG00000180902	D2HGDH	D-2-hydroxyglutarate dehydrogenase [Source:HGNC Symbol;Acc:HGNC:28358]	0.2304	0.1686	0.2338	0.1823	0.211	0.2405
ENSG00000135045	C9orf40	chromosome 9 open reading frame 40 [Source:HGNC Symbol;Acc:HGNC:23433]	0.23	0.3425	0.2393	0.4057	0.1768	0.5069
ENSG00000198265	HELZ	helicase with zinc finger [Source:HGNC Symbol;Acc:HGNC:16878]	0.23	0.002483	0.2317	0.02095	0.2436	0.00988
ENSG00000143507	DUSP10	dual specificity phosphatase 10 [Source:HGNC Symbol;Acc:HGNC:3065]	0.23	0.07836	0.2315	0.09545	0.1899	0.1778
ENSG00000162695	SLC30A7	solute carrier family 30 member 7 [Source:HGNC Symbol;Acc:HGNC:19306]	0.23	0.1671	0.2315	0.1848	0.1344	0.4464
ENSG00000087237	CETP	cholesteryl ester transfer protein [Source:HGNC Symbol;Acc:HGNC:1869]	0.2299	0.3939	0.2329	0.4235	0.242	0.4515
ENSG00000115840	SLC25A12	solute carrier family 25 member 12 [Source:HGNC Symbol;Acc:HGNC:10982]	0.2299	0.01142	0.2288	0.06961	0.1992	0.05303
ENSG00000101104	PABPC1L	poly(A) binding protein cytoplasmic 1 like [Source:HGNC Symbol;Acc:HGNC:15797]	0.2298	0.1353	0.2338	0.1678	0.1524	0.3737
ENSG00000196338	NLGN3	neuroligin 3 [Source:HGNC Symbol;Acc:HGNC:14289]	0.2297	0.1885	0.2361	0.2182	0.1629	0.378
ENSG00000222011	FAM185A	family with sequence similarity 185 member A [Source:HGNC Symbol;Acc:HGNC:22412]	0.2297	0.2506	0.2388	0.3148	0.167	0.4852
ENSG00000111196	MAGOHB	mago homolog B, exon junction complex subunit [Source:HGNC Symbol;Acc:HGNC:25504]	0.2296	0.1625	0.2359	0.2182	0.1398	0.4097
ENSG00000159873	CCDC117	coiled-coil domain containing 117 [Source:HGNC Symbol;Acc:HGNC:26599]	0.2296	0.1443	0.2307	0.187	0.2262	0.1952
ENSG00000101966	XIAP	X-linked inhibitor of apoptosis [Source:HGNC Symbol;Acc:HGNC:592]	0.2294	0.09449	0.2316	0.1251	0.1722	0.2212
ENSG00000122406	RPL5	ribosomal protein L5 [Source:HGNC Symbol;Acc:HGNC:10360]	0.2293	0.2331	0.2302	0.2416	0.06154	0.7732
ENSG00000129646	QRICH2	glutamine rich 2 [Source:HGNC Symbol;Acc:HGNC:25326]	0.2292	0.4271	0.2298	0.467	0.2554	0.4152
ENSG00000109586	GALNT7	polypeptide N-acetylgalactosaminyltransferase 7 [Source:HGNC Symbol;Acc:HGNC:4129]	0.229	0.03944	0.2306	0.0684	0.2013	0.08704
ENSG00000179387	ELMOD2	ELMO domain containing 2 [Source:HGNC Symbol;Acc:HGNC:28111]	0.2289	0.1407	0.2308	0.1855	0.1911	0.2646
ENSG00000215421	ZNF407	zinc finger protein 407 [Source:HGNC Symbol;Acc:HGNC:19904]	0.2289	0.2055	0.2318	0.2229	0.1982	0.3038
ENSG00000135476	ESPL1	extra spindle pole bodies like 1, separase [Source:HGNC Symbol;Acc:HGNC:16856]	0.2287	0.4274	0.2349	0.4516	0.2098	0.5413
ENSG00000167720	SRR	serine racemase [Source:HGNC Symbol;Acc:HGNC:14398]	0.2286	0.1914	0.2333	0.2243	0.1818	0.3333
ENSG00000177427	MIEF2	mitochondrial elongation factor 2 [Source:HGNC Symbol;Acc:HGNC:17920]	0.2284	0.4811	0.2247	0.5319	0.2122	0.5769
ENSG00000138639	ARHGAP24	Rho GTPase activating protein 24 [Source:HGNC Symbol;Acc:HGNC:25361]	0.2283	0.3678	0.232	0.3763	0.07525	0.8264
ENSG00000204390	HSPA1L	heat shock protein family A (Hsp70) member 1 like [Source:HGNC Symbol;Acc:HGNC:5234]	0.2283	0.4524	0.2308	0.4866	0.1243	0.724
ENSG00000139631	CSAD	cysteine sulfinic acid decarboxylase [Source:HGNC Symbol;Acc:HGNC:18966]	0.228	0.1749	0.2305	0.1851	0.1903	0.2672
ENSG00000150787	PTS	6-pyruvoyltetrahydropterin synthase [Source:HGNC Symbol;Acc:HGNC:9689]	0.228	0.2207	0.2303	0.2385	0.1391	0.5144
ENSG00000111885	MAN1A1	mannosidase alpha class 1A member 1 [Source:HGNC Symbol;Acc:HGNC:6821]	0.2279	0.1819	0.2291	0.1999	0.2245	0.1804
ENSG00000067208	EVI5	ecotropic viral integration site 5 [Source:HGNC Symbol;Acc:HGNC:3501]	0.2279	0.04866	0.2306	0.07836	0.1849	0.1097
ENSG00000184619	KRBA2	KRAB-A domain containing 2 [Source:HGNC Symbol;Acc:HGNC:26989]	0.2277	0.308	0.2298	0.339	0.1848	0.4533
ENSG00000119812	FAM98A	family with sequence similarity 98 member A [Source:HGNC Symbol;Acc:HGNC:24520]	0.2276	0.05915	0.2292	0.1265	0.2211	0.1158
ENSG00000161958	FGF11	fibroblast growth factor 11 [Source:HGNC Symbol;Acc:HGNC:3667]	0.2276	0.3371	0.2248	0.4133	0.2581	0.2909
ENSG00000234616	JRK	Jrk helix-turn-helix protein [Source:HGNC Symbol;Acc:HGNC:6199]	0.2276	0.09857	0.2293	0.1509	0.1735	0.2783
ENSG00000165669	FAM204A	family with sequence similarity 204 member A [Source:HGNC Symbol;Acc:HGNC:25794]	0.2275	0.05519	0.2301	0.08533	0.1988	0.1215
ENSG00000103160	HSDL1	hydroxysteroid dehydrogenase like 1 [Source:HGNC Symbol;Acc:HGNC:16475]	0.2274	0.1469	0.2274	0.1945	0.2397	0.1895
ENSG00000052749	RRP12	ribosomal RNA processing 12 homolog [Source:HGNC Symbol;Acc:HGNC:29100]	0.2273	0.4103	0.2324	0.4132	0.3385	0.255
ENSG00000204681	GABBR1	gamma-aminobutyric acid type B receptor subunit 1 [Source:HGNC Symbol;Acc:HGNC:4070]	0.2273	0.3226	0.2332	0.3201	0.2256	0.3871
ENSG00000267179		novel protein	0.227	0.3793	0.2264	0.4541	0.2875	0.3746
ENSG00000128513	POT1	protection of telomeres 1 [Source:HGNC Symbol;Acc:HGNC:17284]	0.2269	0.2061	0.2284	0.252	0.2469	0.1852
ENSG00000139163	ETNK1	ethanolamine kinase 1 [Source:HGNC Symbol;Acc:HGNC:24649]	0.2269	0.1895	0.2271	0.2031	0.1463	0.3962
ENSG00000152778	IFIT5	interferon induced protein with tetratricopeptide repeats 5 [Source:HGNC Symbol;Acc:HGNC:13328]	0.2269	0.3818	0.2277	0.398	0.3057	0.3
ENSG00000204406	MBD5	methyl-CpG binding domain protein 5 [Source:HGNC Symbol;Acc:HGNC:20444]	0.2269	0.0678	0.2302	0.1126	0.1493	0.2741
ENSG00000113643	RARS1	arginyl-tRNA synthetase 1 [Source:HGNC Symbol;Acc:HGNC:9870]	0.2268	0.2134	0.2292	0.222	0.1632	0.4087
ENSG00000180008	SOCS4	suppressor of cytokine signaling 4 [Source:HGNC Symbol;Acc:HGNC:19392]	0.2265	0.2085	0.228	0.2258	0.1365	0.4887
ENSG00000179163	FUCA1	alpha-L-fucosidase 1 [Source:HGNC Symbol;Acc:HGNC:4006]	0.2264	0.1443	0.226	0.1657	0.2197	0.2096
ENSG00000156256	USP16	ubiquitin specific peptidase 16 [Source:HGNC Symbol;Acc:HGNC:12614]	0.2263	0.3055	0.23	0.3085	0.2226	0.3297
ENSG00000176473	WDR25	WD repeat domain 25 [Source:HGNC Symbol;Acc:HGNC:21064]	0.2261	0.1265	0.2267	0.1887	0.2381	0.1635
ENSG00000099338	CATSPERG	cation channel sperm associated auxiliary subunit gamma [Source:HGNC Symbol;Acc:HGNC:25243]	0.2259	0.467	0.2289	0.4925	0.2265	0.5065
ENSG00000145687	SSBP2	single stranded DNA binding protein 2 [Source:HGNC Symbol;Acc:HGNC:15831]	0.2259	0.05167	0.2286	0.09175	0.1892	0.136
ENSG00000169155	ZBTB43	zinc finger and BTB domain containing 43 [Source:HGNC Symbol;Acc:HGNC:17908]	0.2259	0.4848	0.2303	0.4817	0.2527	0.4657
ENSG00000178852	EFCAB13	EF-hand calcium binding domain 13 [Source:HGNC Symbol;Acc:HGNC:26864]	0.2258	0.3174	0.2278	0.3395	0.1219	0.6649
ENSG00000162694	EXTL2	exostosin like glycosyltransferase 2 [Source:HGNC Symbol;Acc:HGNC:3516]	0.2256	0.4283	0.2236	0.4962	0.3222	0.3272
ENSG00000011258	MBTD1	mbt domain containing 1 [Source:HGNC Symbol;Acc:HGNC:19866]	0.2255	0.02103	0.2292	0.05447	0.1648	0.1385
ENSG00000101343	CRNKL1	crooked neck pre-mRNA splicing factor 1 [Source:HGNC Symbol;Acc:HGNC:15762]	0.2254	0.04952	0.2274	0.09099	0.2267	0.06876
ENSG00000117151	CTBS	chitobiase [Source:HGNC Symbol;Acc:HGNC:2496]	0.2253	0.1429	0.2256	0.1885	0.1935	0.2877
ENSG00000023697	DERA	deoxyribose-phosphate aldolase [Source:HGNC Symbol;Acc:HGNC:24269]	0.2252	0.05278	0.2277	0.09141	0.1982	0.09915
ENSG00000101639	CEP192	centrosomal protein 192 [Source:HGNC Symbol;Acc:HGNC:25515]	0.2252	0.1203	0.2269	0.1385	0.188	0.2262
ENSG00000151414	NEK7	NIMA related kinase 7 [Source:HGNC Symbol;Acc:HGNC:13386]	0.2252	0.0924	0.2263	0.1225	0.1747	0.2571
ENSG00000026652	AGPAT4	1-acylglycerol-3-phosphate O-acyltransferase 4 [Source:HGNC Symbol;Acc:HGNC:20885]	0.2251	0.3219	0.2286	0.3389	0.2128	0.3961
ENSG00000121749	TBC1D15	TBC1 domain family member 15 [Source:HGNC Symbol;Acc:HGNC:25694]	0.2251	0.1739	0.227	0.192	0.2021	0.2391
ENSG00000136928	GABBR2	gamma-aminobutyric acid type B receptor subunit 2 [Source:HGNC Symbol;Acc:HGNC:4507]	0.225	0.7348	0.2168	0.7946	0.1714	0.8209
ENSG00000114480	GBE1	1,4-alpha-glucan branching enzyme 1 [Source:HGNC Symbol;Acc:HGNC:4180]	0.2249	0.07457	0.2271	0.1089	0.1762	0.1717
ENSG00000126858	RHOT1	ras homolog family member T1 [Source:HGNC Symbol;Acc:HGNC:21168]	0.2248	0.04406	0.2256	0.0694	0.2073	0.1015
ENSG00000171462	DLK2	delta like non-canonical Notch ligand 2 [Source:HGNC Symbol;Acc:HGNC:21113]	0.2248	0.324	0.2289	0.3689	0.2065	0.4125
ENSG00000174799	CEP135	centrosomal protein 135 [Source:HGNC Symbol;Acc:HGNC:29086]	0.2246	0.04369	0.2265	0.1	0.2074	0.08495
ENSG00000145416	MARCHF1	membrane associated ring-CH-type finger 1 [Source:HGNC Symbol;Acc:HGNC:26077]	0.2245	0.2367	0.2232	0.2618	0.2542	0.2096
ENSG00000099991	CABIN1	calcineurin binding protein 1 [Source:HGNC Symbol;Acc:HGNC:24187]	0.2244	0.1348	0.2276	0.152	0.245	0.1406
ENSG00000114978	MOB1A	MOB kinase activator 1A [Source:HGNC Symbol;Acc:HGNC:16015]	0.2244	0.0533	0.2254	0.08791	0.2531	0.05113
ENSG00000148950	IMMP1L	inner mitochondrial membrane peptidase subunit 1 [Source:HGNC Symbol;Acc:HGNC:26317]	0.2243	0.4291	0.2264	0.4834	0.1453	0.6895
ENSG00000003402	CFLAR	CASP8 and FADD like apoptosis regulator [Source:HGNC Symbol;Acc:HGNC:1876]	0.2242	0.01026	0.2254	0.03929	0.2862	0.008147
ENSG00000108094	CUL2	cullin 2 [Source:HGNC Symbol;Acc:HGNC:2552]	0.2241	0.1322	0.2266	0.1637	0.2247	0.1347
ENSG00000167842	MIS12	MIS12 kinetochore complex component [Source:HGNC Symbol;Acc:HGNC:24967]	0.2241	0.1169	0.2306	0.1626	0.124	0.3917
ENSG00000118308	LRMP	lymphoid restricted membrane protein [Source:HGNC Symbol;Acc:HGNC:6690]	0.2236	0.002295	0.2248	0.01996	0.2297	0.01194
ENSG00000137764	MAP2K5	mitogen-activated protein kinase kinase 5 [Source:HGNC Symbol;Acc:HGNC:6845]	0.2236	0.03522	0.227	0.06762	0.169	0.1133
ENSG00000068079	IFI35	interferon induced protein 35 [Source:HGNC Symbol;Acc:HGNC:5399]	0.2235	0.4431	0.2234	0.4541	0.09517	0.7895
ENSG00000153187	HNRNPU	heterogeneous nuclear ribonucleoprotein U [Source:HGNC Symbol;Acc:HGNC:5048]	0.2233	0.03051	0.2258	0.06064	0.2845	0.02358
ENSG00000113441	LNPEP	leucyl and cystinyl aminopeptidase [Source:HGNC Symbol;Acc:HGNC:6656]	0.2233	0.03801	0.225	0.05998	0.1747	0.1233
ENSG00000005187	ACSM3	acyl-CoA synthetase medium chain family member 3 [Source:HGNC Symbol;Acc:HGNC:10522]	0.2232	0.3095	0.2281	0.335	0.1002	0.7214
ENSG00000139620	KANSL2	KAT8 regulatory NSL complex subunit 2 [Source:HGNC Symbol;Acc:HGNC:26024]	0.2232	0.0312	0.2252	0.05938	0.2284	0.04708
ENSG00000164414	SLC35A1	solute carrier family 35 member A1 [Source:HGNC Symbol;Acc:HGNC:11021]	0.2231	0.2717	0.223	0.3094	0.2276	0.3167
ENSG00000115607	IL18RAP	interleukin 18 receptor accessory protein [Source:HGNC Symbol;Acc:HGNC:5989]	0.223	0.7015	0.2205	0.7112	-0.3307	0.6889
ENSG00000118260	CREB1	cAMP responsive element binding protein 1 [Source:HGNC Symbol;Acc:HGNC:2345]	0.223	0.0139	0.2242	0.04978	0.2006	0.05396
ENSG00000075568	TMEM131	transmembrane protein 131 [Source:HGNC Symbol;Acc:HGNC:30366]	0.223	0.03638	0.2256	0.06455	0.2089	0.04873
ENSG00000178700	DHFR2	dihydrofolate reductase 2 [Source:HGNC Symbol;Acc:HGNC:27309]	0.2229	0.5012	0.2208	0.5556	0.1175	0.7728
ENSG00000077585	GPR137B	G protein-coupled receptor 137B [Source:HGNC Symbol;Acc:HGNC:11862]	0.2227	0.2256	0.2257	0.2398	0.1667	0.4157
[truncated: 8,861 more rows]

## Sheet: Neutrophils
Table S5b: Differential gene expression of neutrophils from cure vs TF patients. Contrast numerator: TF. Contrast denominator: Cure.
ensemblgeneid	hgncsymbol	description	deseq_logfc	deseq_adjp	edger_logfc	edger_adjp	limma_logfc	limma_adjp
ENSG00000000419	DPM1	dolichyl-phosphate mannosyltransferase subunit 1, catalytic [Source:HGNC Symbol;Acc:HGNC:3005]	0.07402	0.6784	0.08159	0.7343	0.08397	0.6304
ENSG00000000457	SCYL3	SCY1 like pseudokinase 3 [Source:HGNC Symbol;Acc:HGNC:19285]	0.0684	0.707	0.07533	0.7757	0.04682	0.8082
ENSG00000000460	C1orf112	chromosome 1 open reading frame 112 [Source:HGNC Symbol;Acc:HGNC:25565]	0.0183	0.9608	0.02514	0.9607	-0.0461	0.87
ENSG00000000938	FGR	FGR proto-oncogene, Src family tyrosine kinase [Source:HGNC Symbol;Acc:HGNC:3697]	-0.2162	0.1447	-0.2091	0.226	-0.1864	0.209
ENSG00000001036	FUCA2	alpha-L-fucosidase 2 [Source:HGNC Symbol;Acc:HGNC:4008]	-0.01306	0.9746	-0.006943	0.991	-0.05758	0.8628
ENSG00000001084	GCLC	glutamate-cysteine ligase catalytic subunit [Source:HGNC Symbol;Acc:HGNC:4311]	0.2298	0.3562	0.2353	0.451	0.2015	0.4287
ENSG00000001167	NFYA	nuclear transcription factor Y subunit alpha [Source:HGNC Symbol;Acc:HGNC:7804]	-0.02724	0.9094	-0.02046	0.9538	-0.01534	0.9469
ENSG00000001461	NIPAL3	NIPA like domain containing 3 [Source:HGNC Symbol;Acc:HGNC:25233]	0.117	0.7445	0.1226	0.7863	0.02589	0.9517
ENSG00000001497	LAS1L	LAS1 like ribosome biogenesis factor [Source:HGNC Symbol;Acc:HGNC:25726]	-0.2145	0.4784	-0.2052	0.5924	-0.3358	0.2684
ENSG00000001629	ANKIB1	ankyrin repeat and IBR domain containing 1 [Source:HGNC Symbol;Acc:HGNC:22215]	0.1498	0.3591	0.16	0.4843	0.08796	0.6281
ENSG00000002016	RAD52	RAD52 homolog, DNA repair protein [Source:HGNC Symbol;Acc:HGNC:9824]	0.4135	0.1265	0.4205	0.1668	0.4175	0.1933
ENSG00000002330	BAD	BCL2 associated agonist of cell death [Source:HGNC Symbol;Acc:HGNC:936]	0.06137	0.8963	0.06751	0.9131	-0.0106	0.9845
ENSG00000002549	LAP3	leucine aminopeptidase 3 [Source:HGNC Symbol;Acc:HGNC:18449]	0.9086	0.1033	0.9127	0.1024	1.002	0.1381
ENSG00000002586	CD99	CD99 molecule (Xg blood group) [Source:HGNC Symbol;Acc:HGNC:7082]	-0.1328	0.7854	-0.1274	0.8453	-0.06786	0.8894
ENSG00000002726	AOC1	amine oxidase copper containing 1 [Source:HGNC Symbol;Acc:HGNC:80]	0.1854	0.9419	0.195	0.9684	-0.4124	0.8628
ENSG00000002834	LASP1	LIM and SH3 protein 1 [Source:HGNC Symbol;Acc:HGNC:6513]	-0.1703	0.2513	-0.163	0.3918	-0.1684	0.2287
ENSG00000002919	SNX11	sorting nexin 11 [Source:HGNC Symbol;Acc:HGNC:14975]	-0.2465	0.06234	-0.2397	0.1533	-0.2401	0.1096
ENSG00000003056	M6PR	mannose-6-phosphate receptor, cation dependent [Source:HGNC Symbol;Acc:HGNC:6752]	-0.1867	0.1495	-0.1794	0.3435	-0.1903	0.2006
ENSG00000003137	CYP26B1	cytochrome P450 family 26 subfamily B member 1 [Source:HGNC Symbol;Acc:HGNC:20581]	8.771	0.0003477	7.764	7.693e-05	3.912	0.04708
ENSG00000165949	IFI27	interferon alpha inducible protein 27 [Source:HGNC Symbol;Acc:HGNC:5397]	4.438	0.0009365	4.371	0.02114	1.486	0.4944
ENSG00000003393	ALS2	alsin Rho guanine nucleotide exchange factor ALS2 [Source:HGNC Symbol;Acc:HGNC:443]	-0.2538	0.3087	-0.2458	0.4121	-0.2495	0.3538
ENSG00000003400	CASP10	caspase 10 [Source:HGNC Symbol;Acc:HGNC:1500]	0.3937	0.1537	0.3991	0.1771	0.362	0.236
ENSG00000003402	CFLAR	CASP8 and FADD like apoptosis regulator [Source:HGNC Symbol;Acc:HGNC:1876]	-0.01368	0.9383	-0.006715	0.982	0.01443	0.9325
ENSG00000003509	NDUFAF7	NADH:ubiquinone oxidoreductase complex assembly factor 7 [Source:HGNC Symbol;Acc:HGNC:28816]	-0.03698	0.8914	-0.02825	0.9463	-0.09001	0.6961
ENSG00000003756	RBM5	RNA binding motif protein 5 [Source:HGNC Symbol;Acc:HGNC:9902]	-0.06493	0.5252	-0.0573	0.778	-0.05232	0.6786
ENSG00000003987	MTMR7	myotubularin related protein 7 [Source:HGNC Symbol;Acc:HGNC:7454]	-0.1058	0.6975	-0.1008	0.7907	-0.07399	0.7896
ENSG00000004142	POLDIP2	DNA polymerase delta interacting protein 2 [Source:HGNC Symbol;Acc:HGNC:23781]	0.02549	0.9094	0.03083	0.9267	0.01887	0.9322
ENSG00000004455	AK2	adenylate kinase 2 [Source:HGNC Symbol;Acc:HGNC:362]	-0.2638	0.2533	-0.2572	0.3434	-0.2767	0.2391
ENSG00000004468	CD38	CD38 molecule [Source:HGNC Symbol;Acc:HGNC:1667]	-0.08353	0.8293	-0.0776	0.8767	-0.07653	0.8466
ENSG00000004478	FKBP4	FKBP prolyl isomerase 4 [Source:HGNC Symbol;Acc:HGNC:3720]	-0.005576	0.9908	-0.002207	0.9981	-0.05612	0.889
ENSG00000004487	KDM1A	lysine demethylase 1A [Source:HGNC Symbol;Acc:HGNC:29079]	0.1857	0.4411	0.1917	0.5444	0.1085	0.6955
ENSG00000248405	PRR5-ARHGAP8	PRR5-ARHGAP8 readthrough [Source:HGNC Symbol;Acc:HGNC:34512]	4.357	2.451e-15	4.322	1.741e-10	4.051	0.003562
ENSG00000004660	CAMKK1	calcium/calmodulin dependent protein kinase kinase 1 [Source:HGNC Symbol;Acc:HGNC:1469]	-0.2715	0.2681	-0.2635	0.3281	-0.2626	0.316
ENSG00000004700	RECQL	RecQ like helicase [Source:HGNC Symbol;Acc:HGNC:9948]	-0.05575	0.7947	-0.05045	0.878	-0.04452	0.8396
ENSG00000004766	VPS50	VPS50 subunit of EARP/GARPII complex [Source:HGNC Symbol;Acc:HGNC:25956]	0.1099	0.8818	0.1159	0.8927	-0.2988	0.7164
ENSG00000004777	ARHGAP33	Rho GTPase activating protein 33 [Source:HGNC Symbol;Acc:HGNC:23085]	-0.09876	0.8163	-0.08977	0.8696	-0.04981	0.9171
ENSG00000004779	NDUFAB1	NADH:ubiquinone oxidoreductase subunit AB1 [Source:HGNC Symbol;Acc:HGNC:7694]	0.1205	0.6337	0.1269	0.7136	0.09556	0.7168
ENSG00000004799	PDK4	pyruvate dehydrogenase kinase 4 [Source:HGNC Symbol;Acc:HGNC:8812]	0.174	0.8915	0.1746	0.9094	-0.07406	0.9697
ENSG00000004838	ZMYND10	zinc finger MYND-type containing 10 [Source:HGNC Symbol;Acc:HGNC:19412]	-0.09983	0.7884	-0.09441	0.8512	-0.08235	0.8293
ENSG00000004864	SLC25A13	solute carrier family 25 member 13 [Source:HGNC Symbol;Acc:HGNC:10983]	-0.1871	0.2985	-0.1789	0.4266	-0.2174	0.2608
ENSG00000004866	ST7	suppression of tumorigenicity 7 [Source:HGNC Symbol;Acc:HGNC:11351]	-0.1394	0.8066	-0.1345	0.8616	-0.2029	0.6972
ENSG00000004897	CDC27	cell division cycle 27 [Source:HGNC Symbol;Acc:HGNC:1728]	0.1872	0.1582	0.1945	0.2907	0.1726	0.2222
ENSG00000004975	DVL2	dishevelled segment polarity protein 2 [Source:HGNC Symbol;Acc:HGNC:3086]	0.1185	0.4965	0.1225	0.6423	0.1195	0.5082
ENSG00000005007	UPF1	UPF1 RNA helicase and ATPase [Source:HGNC Symbol;Acc:HGNC:9962]	-0.04409	0.7767	-0.0372	0.884	-0.03481	0.8298
ENSG00000164741	DLC1	DLC1 Rho GTPase activating protein [Source:HGNC Symbol;Acc:HGNC:2897]	4.103	4.447e-06	4.084	6.794e-05	1.307	0.4783
ENSG00000005022	SLC25A5	solute carrier family 25 member 5 [Source:HGNC Symbol;Acc:HGNC:10991]	-0.1958	0.3193	-0.1891	0.4416	-0.1933	0.362
ENSG00000005075	POLR2J	RNA polymerase II subunit J [Source:HGNC Symbol;Acc:HGNC:9197]	0.1641	0.3183	0.1701	0.4426	0.1683	0.3353
ENSG00000005100	DHX33	DEAH-box helicase 33 [Source:HGNC Symbol;Acc:HGNC:16718]	0.0143	0.9741	0.02339	0.9716	-0.1052	0.7344
ENSG00000005108	THSD7A	thrombospondin type 1 domain containing 7A [Source:HGNC Symbol;Acc:HGNC:22207]	-1.21	0.3169	-1.197	0.3835	-0.3073	0.8585
ENSG00000005156	LIG3	DNA ligase 3 [Source:HGNC Symbol;Acc:HGNC:6600]	-0.07966	0.7727	-0.07151	0.8366	-0.06143	0.8389
ENSG00000005175	RPAP3	RNA polymerase II associated protein 3 [Source:HGNC Symbol;Acc:HGNC:26151]	0.3015	0.1605	0.3072	0.1985	0.2944	0.2244
ENSG00000005194	CIAPIN1	cytokine induced apoptosis inhibitor 1 [Source:HGNC Symbol;Acc:HGNC:28050]	0.1204	0.6305	0.1285	0.689	0.08952	0.7415
ENSG00000005206	SPPL2B	signal peptide peptidase like 2B [Source:HGNC Symbol;Acc:HGNC:30627]	-0.008964	0.9755	-0.002027	0.9963	-0.00342	0.9916
ENSG00000005238	FAM214B	family with sequence similarity 214 member B [Source:HGNC Symbol;Acc:HGNC:25666]	-0.1769	0.3748	-0.1691	0.4852	-0.1264	0.5425
ENSG00000005302	MSL3	MSL complex subunit 3 [Source:HGNC Symbol;Acc:HGNC:7370]	0.07194	0.8318	0.07856	0.8459	0.04117	0.9056
ENSG00000005339	CREBBP	CREB binding protein [Source:HGNC Symbol;Acc:HGNC:2348]	-0.03451	0.8495	-0.02775	0.9242	-0.01165	0.9393
ENSG00000005379	TSPOAP1	TSPO associated protein 1 [Source:HGNC Symbol;Acc:HGNC:16831]	0.3181	0.4658	0.3211	0.5399	0.2471	0.645
ENSG00000005381	MPO	myeloperoxidase [Source:HGNC Symbol;Acc:HGNC:7218]	1.255	0.05446	1.257	0.09388	0.7911	0.3198
ENSG00000005483	KMT2E	lysine methyltransferase 2E [Source:HGNC Symbol;Acc:HGNC:18541]	0.05481	0.7405	0.06172	0.7951	0.06005	0.6582
ENSG00000005486	RHBDD2	rhomboid domain containing 2 [Source:HGNC Symbol;Acc:HGNC:23082]	-0.2074	0.1469	-0.2001	0.2649	-0.175	0.274
ENSG00000005801	ZNF195	zinc finger protein 195 [Source:HGNC Symbol;Acc:HGNC:12986]	-0.2329	0.3682	-0.2326	0.5036	-0.2485	0.2844
ENSG00000005810	MYCBP2	MYC binding protein 2 [Source:HGNC Symbol;Acc:HGNC:23386]	0.2794	0.2321	0.2851	0.2684	0.2692	0.2796
ENSG00000005844	ITGAL	integrin subunit alpha L [Source:HGNC Symbol;Acc:HGNC:6148]	0.01869	0.91	0.02471	0.9276	0.03286	0.8342
ENSG00000005889	ZFX	zinc finger protein X-linked [Source:HGNC Symbol;Acc:HGNC:12869]	-0.1084	0.308	-0.09988	0.5579	-0.1026	0.3189
ENSG00000005893	LAMP2	lysosomal associated membrane protein 2 [Source:HGNC Symbol;Acc:HGNC:6501]	-0.1489	0.43	-0.1424	0.5452	-0.1512	0.4429
ENSG00000005961	ITGA2B	integrin subunit alpha 2b [Source:HGNC Symbol;Acc:HGNC:6138]	0.3662	0.5543	0.372	0.6199	0.09027	0.918
ENSG00000006007	GDE1	glycerophosphodiester phosphodiesterase 1 [Source:HGNC Symbol;Acc:HGNC:29644]	0.06754	0.8419	0.07396	0.8612	0.07071	0.8463
ENSG00000006025	OSBPL7	oxysterol binding protein like 7 [Source:HGNC Symbol;Acc:HGNC:16387]	0.2884	0.4489	0.2905	0.538	0.2043	0.5785
ENSG00000006062	MAP3K14	mitogen-activated protein kinase kinase kinase 14 [Source:HGNC Symbol;Acc:HGNC:6853]	-0.09779	0.7361	-0.09074	0.8011	-0.05867	0.8531
ENSG00000006118	TMEM132A	transmembrane protein 132A [Source:HGNC Symbol;Acc:HGNC:31092]	0.23	0.5138	0.2368	0.6081	0.07641	0.8547
ENSG00000006125	AP2B1	adaptor related protein complex 2 subunit beta 1 [Source:HGNC Symbol;Acc:HGNC:563]	0.008592	0.9771	0.01576	0.973	-0.006648	0.9818
ENSG00000006194	ZNF263	zinc finger protein 263 [Source:HGNC Symbol;Acc:HGNC:13056]	-0.1551	0.3117	-0.148	0.4737	-0.1166	0.5301
ENSG00000006327	TNFRSF12A	TNF receptor superfamily member 12A [Source:HGNC Symbol;Acc:HGNC:18152]	-0.161	0.6719	-0.1544	0.7422	-0.1252	0.7693
ENSG00000006451	RALA	RAS like proto-oncogene A [Source:HGNC Symbol;Acc:HGNC:9839]	0.05477	0.7462	0.06309	0.8194	0.01739	0.9316
ENSG00000006453	BAIAP2L1	BAR/IMD domain containing adaptor protein 2 like 1 [Source:HGNC Symbol;Acc:HGNC:21649]	-0.0856	0.8438	-0.07813	0.8888	-0.212	0.5875
ENSG00000006459	KDM7A	lysine demethylase 7A [Source:HGNC Symbol;Acc:HGNC:22224]	0.009129	0.9727	0.01657	0.9607	0.02161	0.9085
ENSG00000006534	ALDH3B1	aldehyde dehydrogenase 3 family member B1 [Source:HGNC Symbol;Acc:HGNC:410]	-0.005965	0.9874	0.001174	0.9984	-0.01027	0.9788
ENSG00000006555	TTC22	tetratricopeptide repeat domain 22 [Source:HGNC Symbol;Acc:HGNC:26067]	-0.1051	0.7704	-0.1008	0.8358	-0.06917	0.8594
ENSG00000006576	PHTF2	putative homeodomain transcription factor 2 [Source:HGNC Symbol;Acc:HGNC:13411]	0.04265	0.8438	0.05176	0.8692	0.01441	0.9517
ENSG00000006607	FARP2	FERM, ARH/RhoGEF and pleckstrin domain protein 2 [Source:HGNC Symbol;Acc:HGNC:16460]	-0.04002	0.9094	-0.03338	0.9464	-0.03738	0.9103
ENSG00000006634	DBF4	DBF4 zinc finger [Source:HGNC Symbol;Acc:HGNC:17364]	-0.043	0.9552	-0.03597	0.973	0.09805	0.8691
ENSG00000006652	IFRD1	interferon related developmental regulator 1 [Source:HGNC Symbol;Acc:HGNC:5456]	0.1934	0.5192	0.1995	0.5677	0.2161	0.4988
ENSG00000006712	PAF1	PAF1 homolog, Paf1/RNA polymerase II complex component [Source:HGNC Symbol;Acc:HGNC:25459]	-0.1446	0.3177	-0.1375	0.4719	-0.1255	0.4019
ENSG00000006715	VPS41	VPS41 subunit of HOPS complex [Source:HGNC Symbol;Acc:HGNC:12713]	-0.3395	0.127	-0.3314	0.1622	-0.362	0.158
ENSG00000006744	ELAC2	elaC ribonuclease Z 2 [Source:HGNC Symbol;Acc:HGNC:14198]	0.156	0.6631	0.1633	0.7127	0.112	0.7693
ENSG00000186654	PRR5	proline rich 5 [Source:HGNC Symbol;Acc:HGNC:31682]	3.694	4.327e-09	3.64	1.545e-06	3.149	0.005228
ENSG00000173801	JUP	junction plakoglobin [Source:HGNC Symbol;Acc:HGNC:6207]	3.513	9.328e-06	3.496	0.0008397	1.91	0.2695
ENSG00000115919	KYNU	kynureninase [Source:HGNC Symbol;Acc:HGNC:6469]	3.287	4.445e-05	3.294	0.0002795	2.522	0.1193
ENSG00000007080	CCDC124	coiled-coil domain containing 124 [Source:HGNC Symbol;Acc:HGNC:25171]	0.1347	0.7076	0.1431	0.7386	0.09423	0.8116
ENSG00000007129	CEACAM21	CEA cell adhesion molecule 21 [Source:HGNC Symbol;Acc:HGNC:28834]	0.03913	0.9234	0.04597	0.9306	-0.01204	0.9794
ENSG00000007168	PAFAH1B1	platelet activating factor acetylhydrolase 1b regulatory subunit 1 [Source:HGNC Symbol;Acc:HGNC:8574]	-0.0739	0.6172	-0.06666	0.7649	-0.06199	0.6356
ENSG00000007174	DNAH9	dynein axonemal heavy chain 9 [Source:HGNC Symbol;Acc:HGNC:2953]	-0.1713	0.4232	-0.1614	0.5839	-0.2238	0.2978
ENSG00000007202	KIAA0100	KIAA0100 [Source:HGNC Symbol;Acc:HGNC:28960]	0.001315	0.9946	0.008586	0.9796	0.001974	0.9932
ENSG00000007237		growth arrest specific 7 [Source:NCBI gene;Acc:8522]	-0.1834	0.6585	-0.1783	0.7253	-0.1015	0.8466
ENSG00000007341	ST7L	suppression of tumorigenicity 7 like [Source:HGNC Symbol;Acc:HGNC:18441]	0.4313	0.07159	0.4376	0.09949	0.3662	0.2049
ENSG00000007350	TKTL1	transketolase like 1 [Source:HGNC Symbol;Acc:HGNC:11835]	0.6089	0.4173	0.6146	0.4735	0.5519	0.5887
ENSG00000007376	RPUSD1	RNA pseudouridine synthase domain containing 1 [Source:HGNC Symbol;Acc:HGNC:14173]	0.0224	0.9555	0.02924	0.9544	0.01094	0.978
ENSG00000007392	LUC7L	LUC7 like [Source:HGNC Symbol;Acc:HGNC:6723]	-0.2276	0.1463	-0.2196	0.2788	-0.2324	0.2084
ENSG00000007516	BAIAP3	BAI1 associated protein 3 [Source:HGNC Symbol;Acc:HGNC:948]	0.2572	0.5442	0.2656	0.5974	0.3475	0.4151
ENSG00000007520	TSR3	TSR3 ribosome maturation factor [Source:HGNC Symbol;Acc:HGNC:14175]	-0.1775	0.4965	-0.1696	0.6114	-0.1655	0.5483
ENSG00000007541	PIGQ	phosphatidylinositol glycan anchor biosynthesis class Q [Source:HGNC Symbol;Acc:HGNC:14135]	-0.04449	0.9096	-0.03618	0.9464	-0.08727	0.7814
ENSG00000007923	DNAJC11	DnaJ heat shock protein family (Hsp40) member C11 [Source:HGNC Symbol;Acc:HGNC:25570]	-0.1473	0.7352	-0.1438	0.8085	-0.3118	0.3639
ENSG00000007944	MYLIP	myosin regulatory light chain interacting protein [Source:HGNC Symbol;Acc:HGNC:21155]	0.1359	0.6791	0.1427	0.7058	0.09753	0.7851
ENSG00000007968	E2F2	E2F transcription factor 2 [Source:HGNC Symbol;Acc:HGNC:3114]	-0.1419	0.8961	-0.1338	0.9217	-0.2157	0.8547
ENSG00000008018	PSMB1	proteasome 20S subunit beta 1 [Source:HGNC Symbol;Acc:HGNC:9537]	-0.06961	0.6625	-0.06248	0.7863	-0.03796	0.8401
ENSG00000008056	SYN1	synapsin I [Source:HGNC Symbol;Acc:HGNC:11494]	-0.2959	0.671	-0.2874	0.7386	-0.3941	0.6094
ENSG00000008083	JARID2	jumonji and AT-rich interaction domain containing 2 [Source:HGNC Symbol;Acc:HGNC:6196]	0.1349	0.478	0.1402	0.5705	0.1466	0.4318
ENSG00000107789	MINPP1	multiple inositol-polyphosphate phosphatase 1 [Source:HGNC Symbol;Acc:HGNC:7102]	3.278	0.003771	3.428	0.006679	2.053	0.1258
ENSG00000008118	CAMK1G	calcium/calmodulin dependent protein kinase IG [Source:HGNC Symbol;Acc:HGNC:14585]	0.1016	0.9002	0.09189	0.9271	-0.2386	0.6879
ENSG00000008128	CDK11A	cyclin dependent kinase 11A [Source:HGNC Symbol;Acc:HGNC:1730]	-0.04311	0.8852	-0.0364	0.9244	-0.04798	0.8664
ENSG00000008130	NADK	NAD kinase [Source:HGNC Symbol;Acc:HGNC:29831]	0.1161	0.4997	0.1226	0.5797	0.1439	0.2286
ENSG00000008226	DLEC1	DLEC1 cilia and flagella associated protein [Source:HGNC Symbol;Acc:HGNC:2899]	0.2168	0.5103	0.2233	0.5805	0.2303	0.4595
ENSG00000008256	CYTH3	cytohesin 3 [Source:HGNC Symbol;Acc:HGNC:9504]	-0.06316	0.7969	-0.05608	0.8755	-0.09293	0.6941
ENSG00000008282	SYPL1	synaptophysin like 1 [Source:HGNC Symbol;Acc:HGNC:11507]	-0.05948	0.8165	-0.05242	0.888	-0.06712	0.7905
ENSG00000008283	CYB561	cytochrome b561 [Source:HGNC Symbol;Acc:HGNC:2571]	0.7165	0.05416	0.7219	0.06573	0.675	0.1925
ENSG00000008294	SPAG9	sperm associated antigen 9 [Source:HGNC Symbol;Acc:HGNC:14524]	-0.108	0.3794	-0.1006	0.5928	-0.07551	0.6278
ENSG00000008323	PLEKHG6	pleckstrin homology and RhoGEF domain containing G6 [Source:HGNC Symbol;Acc:HGNC:25562]	0.4667	0.06627	0.4717	0.09109	0.4545	0.1423
ENSG00000008382	MPND	MPN domain containing [Source:HGNC Symbol;Acc:HGNC:25934]	0.03851	0.9094	0.04371	0.9242	0.06125	0.829
ENSG00000008405	CRY1	cryptochrome circadian regulator 1 [Source:HGNC Symbol;Acc:HGNC:2384]	-0.3441	0.1279	-0.3367	0.1916	-0.3123	0.2368
ENSG00000008438	PGLYRP1	peptidoglycan recognition protein 1 [Source:HGNC Symbol;Acc:HGNC:8904]	0.35	0.3463	0.358	0.3951	0.3049	0.4844
ENSG00000008513	ST3GAL1	ST3 beta-galactoside alpha-2,3-sialyltransferase 1 [Source:HGNC Symbol;Acc:HGNC:10862]	-0.08475	0.7407	-0.0794	0.8049	-0.07881	0.7312
ENSG00000008516	MMP25	matrix metallopeptidase 25 [Source:HGNC Symbol;Acc:HGNC:14246]	-0.1607	0.2634	-0.1528	0.3766	-0.1017	0.5715
ENSG00000008517	IL32	interleukin 32 [Source:HGNC Symbol;Acc:HGNC:16830]	-0.1486	0.5387	-0.1422	0.6194	-0.1518	0.5425
ENSG00000008710	PKD1	polycystin 1, transient receptor potential channel interacting [Source:HGNC Symbol;Acc:HGNC:9008]	-0.0535	0.9216	-0.05206	0.9464	-0.1624	0.6796
ENSG00000008838	MED24	mediator complex subunit 24 [Source:HGNC Symbol;Acc:HGNC:22963]	0.08092	0.8467	0.0837	0.8818	0.1353	0.682
ENSG00000008853	RHOBTB2	Rho related BTB domain containing 2 [Source:HGNC Symbol;Acc:HGNC:18756]	0.2713	0.3813	0.2753	0.4718	0.2456	0.4847
ENSG00000008869	HEATR5B	HEAT repeat containing 5B [Source:HGNC Symbol;Acc:HGNC:29273]	0.4971	0.1469	0.5029	0.1677	0.3858	0.3297
ENSG00000008952	SEC62	SEC62 homolog, preprotein translocation factor [Source:HGNC Symbol;Acc:HGNC:11846]	-0.1627	0.3672	-0.1556	0.4767	-0.1774	0.3092
ENSG00000008988	RPS20	ribosomal protein S20 [Source:HGNC Symbol;Acc:HGNC:10405]	0.02354	0.9524	0.02967	0.9537	0.05588	0.867
ENSG00000009307	CSDE1	cold shock domain containing E1 [Source:HGNC Symbol;Acc:HGNC:29905]	-0.06901	0.4663	-0.06159	0.7535	-0.04321	0.7357
ENSG00000009335	UBE3C	ubiquitin protein ligase E3C [Source:HGNC Symbol;Acc:HGNC:16803]	-0.1303	0.3117	-0.1237	0.5421	-0.1347	0.3357
ENSG00000009413	REV3L	REV3 like, DNA directed polymerase zeta catalytic subunit [Source:HGNC Symbol;Acc:HGNC:9968]	0.1916	0.4768	0.1995	0.5356	0.1686	0.5805
ENSG00000154529	CNTNAP3B	contactin associated protein like 3B [Source:HGNC Symbol;Acc:HGNC:32035]	3.093	0.0004138	3.086	0.009408	1.324	0.5139
ENSG00000009780	FAM76A	family with sequence similarity 76 member A [Source:HGNC Symbol;Acc:HGNC:28530]	0.001555	0.9946	0.00382	0.9939	-0.03184	0.8869
ENSG00000009790	TRAF3IP3	TRAF3 interacting protein 3 [Source:HGNC Symbol;Acc:HGNC:30766]	-0.2934	0.3537	-0.2857	0.408	-0.2747	0.4177
ENSG00000009830	POMT2	protein O-mannosyltransferase 2 [Source:HGNC Symbol;Acc:HGNC:19743]	0.1063	0.7062	0.1146	0.7519	0.07777	0.7848
ENSG00000009844	VTA1	vesicle trafficking 1 [Source:HGNC Symbol;Acc:HGNC:20954]	0.1073	0.574	0.1145	0.6589	0.09094	0.6583
ENSG00000009954	BAZ1B	bromodomain adjacent to zinc finger domain 1B [Source:HGNC Symbol;Acc:HGNC:961]	-0.06604	0.7622	-0.05994	0.849	-0.08164	0.6886
ENSG00000010017	RANBP9	RAN binding protein 9 [Source:HGNC Symbol;Acc:HGNC:13727]	0.0628	0.7238	0.07159	0.7796	0.03771	0.8439
ENSG00000010030	ETV7	ETS variant transcription factor 7 [Source:HGNC Symbol;Acc:HGNC:18160]	-0.1736	0.8368	-0.1701	0.866	-0.1253	0.9079
ENSG00000010072	SPRTN	SprT-like N-terminal domain [Source:HGNC Symbol;Acc:HGNC:25356]	0.08276	0.6566	0.08976	0.7346	0.08383	0.6497
ENSG00000010165	EEF1AKNMT	eEF1A lysine and N-terminal methyltransferase [Source:HGNC Symbol;Acc:HGNC:24248]	0.06853	0.7986	0.07658	0.8446	0.004141	0.9902
ENSG00000010244	ZNF207	zinc finger protein 207 [Source:HGNC Symbol;Acc:HGNC:12998]	0.01742	0.9387	0.02486	0.9329	0.02201	0.9095
ENSG00000010256	UQCRC1	ubiquinol-cytochrome c reductase core protein 1 [Source:HGNC Symbol;Acc:HGNC:12585]	-0.04473	0.8294	-0.0389	0.9076	-0.0399	0.8531
ENSG00000010270	STARD3NL	STARD3 N-terminal like [Source:HGNC Symbol;Acc:HGNC:19169]	0.3623	0.2481	0.3681	0.2864	0.3404	0.3503
ENSG00000010278	CD9	CD9 molecule [Source:HGNC Symbol;Acc:HGNC:1709]	-0.8989	0.05679	-0.8925	0.09531	-0.6661	0.3204
ENSG00000010292	NCAPD2	non-SMC condensin I complex subunit D2 [Source:HGNC Symbol;Acc:HGNC:24305]	-0.1239	0.5387	-0.1169	0.6668	-0.1538	0.4376
ENSG00000010295	IFFO1	intermediate filament family orphan 1 [Source:HGNC Symbol;Acc:HGNC:24970]	-0.1522	0.48	-0.1451	0.6033	-0.1228	0.6158
ENSG00000010318	PHF7	PHD finger protein 7 [Source:HGNC Symbol;Acc:HGNC:18458]	0.1899	0.3429	0.1963	0.4678	0.1357	0.5487
ENSG00000010322	NISCH	nischarin [Source:HGNC Symbol;Acc:HGNC:18006]	-0.03824	0.819	-0.03126	0.9076	-0.006705	0.9746
ENSG00000010361	FUZ	fuzzy planar cell polarity protein [Source:HGNC Symbol;Acc:HGNC:26219]	0.1574	0.4779	0.1643	0.5452	0.1968	0.3672
ENSG00000010539	ZNF200	zinc finger protein 200 [Source:HGNC Symbol;Acc:HGNC:12993]	0.06805	0.8845	0.07218	0.9004	0.02311	0.9635
ENSG00000010610	CD4	CD4 molecule [Source:HGNC Symbol;Acc:HGNC:1678]	0.1945	0.7492	0.2018	0.7775	0.06466	0.9349
ENSG00000010626	LRRC23	leucine rich repeat containing 23 [Source:HGNC Symbol;Acc:HGNC:19138]	0.2962	0.3429	0.3025	0.4292	0.3457	0.2802
ENSG00000010671	BTK	Bruton tyrosine kinase [Source:HGNC Symbol;Acc:HGNC:1133]	0.02653	0.9222	0.0329	0.9271	0.05401	0.8181
ENSG00000010704	HFE	homeostatic iron regulator [Source:HGNC Symbol;Acc:HGNC:4886]	0.3409	0.2472	0.3462	0.3114	0.2454	0.4756
ENSG00000010810	FYN	FYN proto-oncogene, Src family tyrosine kinase [Source:HGNC Symbol;Acc:HGNC:4037]	0.4843	0.4134	0.4887	0.4566	0.4055	0.5861
ENSG00000010818	HIVEP2	HIVEP zinc finger 2 [Source:HGNC Symbol;Acc:HGNC:4921]	0.2791	0.1518	0.2847	0.1903	0.2779	0.1795
ENSG00000011007	ELOA	elongin A [Source:HGNC Symbol;Acc:HGNC:11620]	0.1839	0.3662	0.1909	0.4574	0.1723	0.4426
ENSG00000011009	LYPLA2	lysophospholipase 2 [Source:HGNC Symbol;Acc:HGNC:6738]	0.08819	0.556	0.09534	0.6457	0.1139	0.4279
ENSG00000011021	CLCN6	chloride voltage-gated channel 6 [Source:HGNC Symbol;Acc:HGNC:2024]	-0.4481	0.1669	-0.4392	0.2164	-0.6245	0.1258
ENSG00000011105	TSPAN9	tetraspanin 9 [Source:HGNC Symbol;Acc:HGNC:21640]	0.5677	0.1202	0.5746	0.1373	0.3335	0.4862
ENSG00000011114	BTBD7	BTB domain containing 7 [Source:HGNC Symbol;Acc:HGNC:18269]	-0.1251	0.2526	-0.1157	0.5134	-0.137	0.26
ENSG00000011132	APBA3	amyloid beta precursor protein binding family A member 3 [Source:HGNC Symbol;Acc:HGNC:580]	0.05069	0.8612	0.05885	0.8757	0.02261	0.945
ENSG00000011198	ABHD5	abhydrolase domain containing 5 [Source:HGNC Symbol;Acc:HGNC:21396]	-0.1772	0.2951	-0.1699	0.422	-0.1648	0.4032
ENSG00000011243	AKAP8L	A-kinase anchoring protein 8 like [Source:HGNC Symbol;Acc:HGNC:29857]	-0.1286	0.326	-0.1214	0.5091	-0.1101	0.4466
ENSG00000011258	MBTD1	mbt domain containing 1 [Source:HGNC Symbol;Acc:HGNC:19866]	-0.1041	0.6172	-0.09617	0.728	-0.1499	0.4107
ENSG00000011260	UTP18	UTP18 small subunit processome component [Source:HGNC Symbol;Acc:HGNC:24274]	0.2387	0.2257	0.2467	0.2945	0.19	0.3582
ENSG00000011275	RNF216	ring finger protein 216 [Source:HGNC Symbol;Acc:HGNC:21698]	0.04703	0.8206	0.05345	0.8489	0.06721	0.7309
ENSG00000011295	TTC19	tetratricopeptide repeat domain 19 [Source:HGNC Symbol;Acc:HGNC:26006]	-0.02723	0.941	-0.02087	0.9715	0.01833	0.9565
ENSG00000011304	PTBP1	polypyrimidine tract binding protein 1 [Source:HGNC Symbol;Acc:HGNC:9583]	-0.07786	0.7043	-0.07045	0.7963	-0.05182	0.8142
ENSG00000011376	LARS2	leucyl-tRNA synthetase 2, mitochondrial [Source:HGNC Symbol;Acc:HGNC:17095]	-0.01735	0.9712	-0.01161	0.9864	-0.04048	0.9096
ENSG00000011405	PIK3C2A	phosphatidylinositol-4-phosphate 3-kinase catalytic subunit type 2 alpha [Source:HGNC Symbol;Acc:HGNC:8971]	0.04218	0.8583	0.04982	0.8733	0.01892	0.9363
ENSG00000011422	PLAUR	plasminogen activator, urokinase receptor [Source:HGNC Symbol;Acc:HGNC:9053]	0.3615	0.2247	0.3675	0.2649	0.4336	0.1716
ENSG00000011451	WIZ	WIZ zinc finger [Source:HGNC Symbol;Acc:HGNC:30917]	-0.2046	0.5031	-0.1964	0.59	-0.2031	0.546
ENSG00000011454	RABGAP1	RAB GTPase activating protein 1 [Source:HGNC Symbol;Acc:HGNC:17155]	-0.1555	0.06852	-0.1472	0.2961	-0.1475	0.1728
ENSG00000011478	QPCTL	glutaminyl-peptide cyclotransferase like [Source:HGNC Symbol;Acc:HGNC:25952]	0.09355	0.8583	0.102	0.887	-0.1069	0.8594
ENSG00000144115	THNSL2	threonine synthase like 2 [Source:HGNC Symbol;Acc:HGNC:25602]	2.747	0.04061	2.606	0.08786	1.98	0.1867
ENSG00000011600	TYROBP	TYRO protein tyrosine kinase binding protein [Source:HGNC Symbol;Acc:HGNC:12449]	-0.1334	0.4597	-0.1265	0.5905	-0.09691	0.5697
ENSG00000011638	TMEM159	transmembrane protein 159 [Source:HGNC Symbol;Acc:HGNC:30136]	-0.04897	0.9133	-0.04292	0.9498	-0.0829	0.8561
ENSG00000012048	BRCA1	BRCA1 DNA repair associated [Source:HGNC Symbol;Acc:HGNC:1100]	0.04173	0.856	0.04935	0.871	0.04038	0.8628
ENSG00000012061	ERCC1	ERCC excision repair 1, endonuclease non-catalytic subunit [Source:HGNC Symbol;Acc:HGNC:3433]	-0.2424	0.5585	-0.2353	0.624	-0.2858	0.4975
ENSG00000012124	CD22	CD22 molecule [Source:HGNC Symbol;Acc:HGNC:1643]	0.3075	0.4779	0.317	0.5446	0.1297	0.829
ENSG00000135116	HRK	harakiri, BCL2 interacting protein [Source:HGNC Symbol;Acc:HGNC:5185]	2.533	2e-06	2.51	1.4e-05	2.35	0.01259
ENSG00000012211	PRICKLE3	prickle planar cell polarity protein 3 [Source:HGNC Symbol;Acc:HGNC:6645]	-0.01529	0.9744	-0.008621	0.991	-0.1053	0.7808
ENSG00000012223	LTF	lactotransferrin [Source:HGNC Symbol;Acc:HGNC:6720]	0.1037	0.8467	0.1113	0.8654	-0.03197	0.9565
ENSG00000124785	NRN1	neuritin 1 [Source:HGNC Symbol;Acc:HGNC:17972]	2.376	0.01472	2.372	0.01671	2.456	0.117
ENSG00000012660	ELOVL5	ELOVL fatty acid elongase 5 [Source:HGNC Symbol;Acc:HGNC:21308]	0.1793	0.1921	0.1855	0.2873	0.193	0.2156
ENSG00000012779	ALOX5	arachidonate 5-lipoxygenase [Source:HGNC Symbol;Acc:HGNC:435]	-0.1621	0.338	-0.1546	0.4605	-0.1192	0.5082
ENSG00000012817	KDM5D	lysine demethylase 5D [Source:HGNC Symbol;Acc:HGNC:11115]	-0.2416	0.7947	-0.2341	0.8334	0.128	0.9103
ENSG00000012822	CALCOCO1	calcium binding and coiled-coil domain 1 [Source:HGNC Symbol;Acc:HGNC:29306]	-0.08493	0.5141	-0.07828	0.7144	-0.07181	0.6634
ENSG00000012963	UBR7	ubiquitin protein ligase E3 component n-recognin 7 (putative) [Source:HGNC Symbol;Acc:HGNC:20344]	0.09127	0.6653	0.09676	0.7468	0.05225	0.8357
ENSG00000012983	MAP4K5	mitogen-activated protein kinase kinase kinase kinase 5 [Source:HGNC Symbol;Acc:HGNC:6867]	-0.3562	0.5757	-0.3506	0.6539	-0.595	0.26
ENSG00000013275	PSMC4	proteasome 26S subunit, ATPase 4 [Source:HGNC Symbol;Acc:HGNC:9551]	-0.103	0.6486	-0.09522	0.7484	-0.08178	0.7357
ENSG00000013288	MAN2B2	mannosidase alpha class 2B member 2 [Source:HGNC Symbol;Acc:HGNC:29623]	0.01155	0.9698	0.01801	0.9629	0.01518	0.9507
ENSG00000013306	SLC25A39	solute carrier family 25 member 39 [Source:HGNC Symbol;Acc:HGNC:24279]	0.04899	0.911	0.05546	0.9228	-0.002982	0.9961
ENSG00000013364	MVP	major vault protein [Source:HGNC Symbol;Acc:HGNC:7531]	0.09168	0.5938	0.09823	0.6737	0.118	0.3712
ENSG00000013374	NUB1	negative regulator of ubiquitin like proteins 1 [Source:HGNC Symbol;Acc:HGNC:17623]	0.3058	0.3494	0.3116	0.3794	0.2818	0.3854
ENSG00000013375	PGM3	phosphoglucomutase 3 [Source:HGNC Symbol;Acc:HGNC:8907]	0.1116	0.8053	0.1204	0.8244	-0.04072	0.9331
ENSG00000013441	CLK1	CDC like kinase 1 [Source:HGNC Symbol;Acc:HGNC:2068]	0.04196	0.8557	0.04931	0.871	0.0471	0.8479
ENSG00000013503	POLR3B	RNA polymerase III subunit B [Source:HGNC Symbol;Acc:HGNC:30348]	-0.009316	0.9817	-0.003011	0.9963	-0.06146	0.8386
ENSG00000013523	ANGEL1	angel homolog 1 [Source:HGNC Symbol;Acc:HGNC:19961]	-0.1967	0.8234	-0.1895	0.8665	-0.1087	0.918
ENSG00000164125	GASK1B	golgi associated kinase 1B [Source:HGNC Symbol;Acc:HGNC:25312]	2.364	7.635e-05	2.358	0.0001991	1.595	0.2174
ENSG00000013583	HEBP1	heme binding protein 1 [Source:HGNC Symbol;Acc:HGNC:17176]	0.07177	0.8434	0.07733	0.8694	0.04851	0.903
ENSG00000013725	CD6	CD6 molecule [Source:HGNC Symbol;Acc:HGNC:1691]	-0.5389	0.1575	-0.533	0.2108	-0.6244	0.1708
ENSG00000266302		novel transcript	2.319	0.04104	2.312	0.04518	0.6484	0.7776
ENSG00000014123	UFL1	UFM1 specific ligase 1 [Source:HGNC Symbol;Acc:HGNC:23039]	0.2086	0.5226	0.2171	0.5817	0.1478	0.6955
ENSG00000014164	ZC3H3	zinc finger CCCH-type containing 3 [Source:HGNC Symbol;Acc:HGNC:28972]	0.1044	0.6648	0.1118	0.6887	0.1645	0.4287
ENSG00000014216	CAPN1	calpain 1 [Source:HGNC Symbol;Acc:HGNC:1476]	-0.01959	0.9376	-0.01239	0.975	-0.003954	0.9872
ENSG00000014257	ACPP	acid phosphatase, prostate [Source:HGNC Symbol;Acc:HGNC:125]	-0.2663	0.3382	-0.2597	0.4007	-0.2619	0.4042
ENSG00000014824	SLC30A9	solute carrier family 30 member 9 [Source:HGNC Symbol;Acc:HGNC:1329]	0.1144	0.5698	0.1231	0.6533	0.08084	0.7008
ENSG00000015133	CCDC88C	coiled-coil domain containing 88C [Source:HGNC Symbol;Acc:HGNC:19967]	0.3018	0.127	0.3065	0.2026	0.2946	0.1728
ENSG00000015153	YAF2	YY1 associated factor 2 [Source:HGNC Symbol;Acc:HGNC:17363]	0.07965	0.7407	0.08844	0.7649	0.04607	0.8513
ENSG00000015285	WAS	WASP actin nucleation promoting factor [Source:HGNC Symbol;Acc:HGNC:12731]	-0.0364	0.8295	-0.0301	0.9152	-0.03077	0.8233
ENSG00000015475	BID	BH3 interacting domain death agonist [Source:HGNC Symbol;Acc:HGNC:1050]	0.04881	0.8268	0.05612	0.849	0.0962	0.5736
ENSG00000015532	XYLT2	xylosyltransferase 2 [Source:HGNC Symbol;Acc:HGNC:15517]	-0.07089	0.806	-0.06484	0.8737	-0.1226	0.6229
ENSG00000015676	NUDCD3	NudC domain containing 3 [Source:HGNC Symbol;Acc:HGNC:22208]	0.002537	0.9908	0.009021	0.9818	-0.01626	0.9347
ENSG00000016864	GLT8D1	glycosyltransferase 8 domain containing 1 [Source:HGNC Symbol;Acc:HGNC:24870]	-0.02298	0.9384	-0.01343	0.9792	-0.08358	0.7164
ENSG00000017260	ATP2C1	ATPase secretory pathway Ca2+ transporting 1 [Source:HGNC Symbol;Acc:HGNC:13211]	-0.06658	0.7019	-0.05897	0.8296	-0.06401	0.7184
ENSG00000017797	RALBP1	ralA binding protein 1 [Source:HGNC Symbol;Acc:HGNC:9841]	0.04211	0.8809	0.04762	0.8937	0.05397	0.8531
ENSG00000018280	SLC11A1	solute carrier family 11 member 1 [Source:HGNC Symbol;Acc:HGNC:10907]	-0.34	0.09645	-0.3314	0.1207	-0.2762	0.2924
ENSG00000018408	WWTR1	WW domain containing transcription regulator 1 [Source:HGNC Symbol;Acc:HGNC:24042]	-0.1528	0.701	-0.1477	0.7963	-0.2495	0.4912
ENSG00000018510	AGPS	alkylglycerone phosphate synthase [Source:HGNC Symbol;Acc:HGNC:327]	0.1305	0.5857	0.1392	0.6641	0.08168	0.7436
ENSG00000018610	CXorf56	chromosome X open reading frame 56 [Source:HGNC Symbol;Acc:HGNC:26239]	-0.1345	0.4719	-0.1272	0.6381	-0.1609	0.3813
ENSG00000019582	CD74	CD74 molecule [Source:HGNC Symbol;Acc:HGNC:1697]	0.2435	0.4742	0.2489	0.5105	0.2815	0.4054
ENSG00000019991	HGF	hepatocyte growth factor [Source:HGNC Symbol;Acc:HGNC:4893]	0.06501	0.9263	0.0716	0.9351	-0.09172	0.9096
ENSG00000019995	ZRANB1	zinc finger RANBP2-type containing 1 [Source:HGNC Symbol;Acc:HGNC:18224]	-0.04493	0.7688	-0.03771	0.8784	-0.03322	0.8348
ENSG00000020129	NCDN	neurochondrin [Source:HGNC Symbol;Acc:HGNC:17597]	0.7879	0.07047	0.7893	0.1114	0.8723	0.1867
ENSG00000020633	RUNX3	RUNX family transcription factor 3 [Source:HGNC Symbol;Acc:HGNC:10473]	-0.09943	0.7849	-0.09276	0.8306	-0.1155	0.7442
ENSG00000020922	MRE11	MRE11 homolog, double strand break repair nuclease [Source:HGNC Symbol;Acc:HGNC:7230]	0.08988	0.7002	0.0975	0.7453	0.06316	0.7921
ENSG00000021355	SERPINB1	serpin family B member 1 [Source:HGNC Symbol;Acc:HGNC:3311]	0.2136	0.3574	0.2201	0.412	0.2293	0.3058
ENSG00000021574	SPAST	spastin [Source:HGNC Symbol;Acc:HGNC:11233]	-0.00117	0.9953	0.006131	0.9902	-0.01458	0.9553
ENSG00000021762	OSBPL5	oxysterol binding protein like 5 [Source:HGNC Symbol;Acc:HGNC:16392]	0.572	0.3163	0.5768	0.3644	0.6565	0.3548
ENSG00000021776	AQR	aquarius intron-binding spliceosomal factor [Source:HGNC Symbol;Acc:HGNC:29513]	-0.05875	0.7564	-0.05272	0.8546	-0.04495	0.8238
ENSG00000022277	RTF2	replication termination factor 2 [Source:HGNC Symbol;Acc:HGNC:15890]	-0.1316	0.1532	-0.1244	0.3961	-0.1145	0.216
ENSG00000022556	NLRP2	NLR family pyrin domain containing 2 [Source:HGNC Symbol;Acc:HGNC:22948]	0.2535	0.5981	0.2608	0.6541	0.3395	0.5002
ENSG00000022567	SLC45A4	solute carrier family 45 member 4 [Source:HGNC Symbol;Acc:HGNC:29196]	-0.03491	0.8798	-0.0275	0.9337	-4.02e-05	0.9999
ENSG00000022840	RNF10	ring finger protein 10 [Source:HGNC Symbol;Acc:HGNC:10055]	-0.01192	0.9746	-0.004148	0.9939	0.03803	0.908
ENSG00000022976	ZNF839	zinc finger protein 839 [Source:HGNC Symbol;Acc:HGNC:20345]	0.02453	0.9116	0.03215	0.9167	0.02932	0.8975
ENSG00000023041	ZDHHC6	zinc finger DHHC-type containing 6 [Source:HGNC Symbol;Acc:HGNC:19160]	0.09167	0.5484	0.09964	0.6643	0.07312	0.6452
ENSG00000204991	SPIRE2	spire type actin nucleation factor 2 [Source:HGNC Symbol;Acc:HGNC:30623]	2.309	0.004112	2.298	0.007101	1.362	0.3118
ENSG00000023191	RNH1	ribonuclease/angiogenin inhibitor 1 [Source:HGNC Symbol;Acc:HGNC:10074]	-0.007069	0.985	0.0004713	0.9993	0.01515	0.9622
ENSG00000023228	NDUFS1	NADH:ubiquinone oxidoreductase core subunit S1 [Source:HGNC Symbol;Acc:HGNC:7707]	-0.05169	0.6204	-0.04151	0.8636	-0.07365	0.484
ENSG00000023287	RB1CC1	RB1 inducible coiled-coil 1 [Source:HGNC Symbol;Acc:HGNC:15574]	-0.02089	0.941	-0.01374	0.9747	-0.01739	0.9452
ENSG00000023318	ERP44	endoplasmic reticulum protein 44 [Source:HGNC Symbol;Acc:HGNC:18311]	0.009238	0.9748	0.01528	0.9734	0.01437	0.9558
ENSG00000023330	ALAS1	5'-aminolevulinate synthase 1 [Source:HGNC Symbol;Acc:HGNC:396]	-0.03096	0.9453	-0.02416	0.9704	-0.00807	0.985
ENSG00000023445	BIRC3	baculoviral IAP repeat containing 3 [Source:HGNC Symbol;Acc:HGNC:591]	0.2511	0.4493	0.2582	0.4775	0.2728	0.3964
ENSG00000023516	AKAP11	A-kinase anchoring protein 11 [Source:HGNC Symbol;Acc:HGNC:369]	-0.2935	0.3668	-0.2855	0.4415	-0.4383	0.1867
ENSG00000023572	GLRX2	glutaredoxin 2 [Source:HGNC Symbol;Acc:HGNC:16065]	0.2613	0.133	0.2683	0.2239	0.2675	0.1716
ENSG00000023608	SNAPC1	small nuclear RNA activating complex polypeptide 1 [Source:HGNC Symbol;Acc:HGNC:11134]	0.1152	0.7427	0.1219	0.7808	0.2005	0.4815
ENSG00000023697	DERA	deoxyribose-phosphate aldolase [Source:HGNC Symbol;Acc:HGNC:24269]	0.1297	0.6493	0.1363	0.7081	0.07514	0.8156
ENSG00000023734	STRAP	serine/threonine kinase receptor associated protein [Source:HGNC Symbol;Acc:HGNC:30796]	-0.1175	0.644	-0.1099	0.7257	-0.09291	0.7241
ENSG00000023839	ABCC2	ATP binding cassette subfamily C member 2 [Source:HGNC Symbol;Acc:HGNC:53]	0.09794	0.5939	0.1042	0.705	0.0778	0.681
ENSG00000023892	DEF6	DEF6 guanine nucleotide exchange factor [Source:HGNC Symbol;Acc:HGNC:2760]	-0.02246	0.932	-0.01527	0.973	-0.02515	0.9201
ENSG00000023902	PLEKHO1	pleckstrin homology domain containing O1 [Source:HGNC Symbol;Acc:HGNC:24310]	0.06462	0.8515	0.07124	0.8684	0.05945	0.8628
ENSG00000023909	GCLM	glutamate-cysteine ligase modifier subunit [Source:HGNC Symbol;Acc:HGNC:4312]	-0.3463	0.1921	-0.3376	0.2547	-0.402	0.1868
ENSG00000024048	UBR2	ubiquitin protein ligase E3 component n-recognin 2 [Source:HGNC Symbol;Acc:HGNC:21289]	0.02972	0.8798	0.03684	0.8908	0.04764	0.7916
ENSG00000024862	CCDC28A	coiled-coil domain containing 28A [Source:HGNC Symbol;Acc:HGNC:21098]	0.04773	0.8793	0.05517	0.879	0.04671	0.8738
ENSG00000025039	RRAGD	Ras related GTP binding D [Source:HGNC Symbol;Acc:HGNC:19903]	-0.08977	0.6174	-0.08366	0.7386	-0.08614	0.6349
ENSG00000025156	HSF2	heat shock transcription factor 2 [Source:HGNC Symbol;Acc:HGNC:5225]	0.0309	0.9679	0.03862	0.9684	0.08079	0.899
ENSG00000025293	PHF20	PHD finger protein 20 [Source:HGNC Symbol;Acc:HGNC:16098]	-0.02835	0.9034	-0.02117	0.951	-0.01247	0.9577
ENSG00000025434	NR1H3	nuclear receptor subfamily 1 group H member 3 [Source:HGNC Symbol;Acc:HGNC:7966]	0.2637	0.4811	0.269	0.5688	0.3057	0.4171
ENSG00000025708	TYMP	thymidine phosphorylase [Source:HGNC Symbol;Acc:HGNC:3148]	0.1702	0.5718	0.176	0.6163	0.2396	0.3458
ENSG00000025770	NCAPH2	non-SMC condensin II complex subunit H2 [Source:HGNC Symbol;Acc:HGNC:25071]	-0.1034	0.7061	-0.09592	0.7863	-0.05679	0.8547
ENSG00000025772	TOMM34	translocase of outer mitochondrial membrane 34 [Source:HGNC Symbol;Acc:HGNC:15746]	0.2972	0.2773	0.3023	0.3666	0.2687	0.3124
ENSG00000025796	SEC63	SEC63 homolog, protein translocation regulator [Source:HGNC Symbol;Acc:HGNC:21082]	-0.05422	0.8207	-0.04597	0.8888	-0.1009	0.6201
ENSG00000025800	KPNA6	karyopherin subunit alpha 6 [Source:HGNC Symbol;Acc:HGNC:6399]	-0.05176	0.7618	-0.04412	0.8708	-0.07068	0.657
ENSG00000026025	VIM	vimentin [Source:HGNC Symbol;Acc:HGNC:12692]	0.08007	0.8049	0.08755	0.8189	0.1159	0.7244
ENSG00000026103	FAS	Fas cell surface death receptor [Source:HGNC Symbol;Acc:HGNC:11920]	0.23	0.3383	0.2356	0.3725	0.253	0.3198
ENSG00000026297	RNASET2	ribonuclease T2 [Source:HGNC Symbol;Acc:HGNC:21686]	0.344	0.2652	0.3513	0.2826	0.4253	0.2113
ENSG00000026508	CD44	CD44 molecule (Indian blood group) [Source:HGNC Symbol;Acc:HGNC:1681]	-0.03631	0.9376	-0.02945	0.9629	-0.02904	0.9476
ENSG00000026652	AGPAT4	1-acylglycerol-3-phosphate O-acyltransferase 4 [Source:HGNC Symbol;Acc:HGNC:20885]	0.5279	0.194	0.5316	0.2503	0.5283	0.2667
ENSG00000026751	SLAMF7	SLAM family member 7 [Source:HGNC Symbol;Acc:HGNC:21394]	0.6918	0.0776	0.6981	0.08311	0.563	0.2943
ENSG00000026950	BTN3A1	butyrophilin subfamily 3 member A1 [Source:HGNC Symbol;Acc:HGNC:1138]	0.5702	0.08207	0.5739	0.1024	0.5262	0.1868
ENSG00000027075	PRKCH	protein kinase C eta [Source:HGNC Symbol;Acc:HGNC:9403]	0.4763	0.1035	0.4833	0.1367	0.3665	0.3208
ENSG00000027697	IFNGR1	interferon gamma receptor 1 [Source:HGNC Symbol;Acc:HGNC:5439]	-0.209	0.3863	-0.202	0.4605	-0.1562	0.574
ENSG00000027847	B4GALT7	beta-1,4-galactosyltransferase 7 [Source:HGNC Symbol;Acc:HGNC:930]	-0.01069	0.9873	-0.00401	0.9963	-0.17	0.7244
ENSG00000028116	VRK2	VRK serine/threonine kinase 2 [Source:HGNC Symbol;Acc:HGNC:12719]	0.4541	0.08837	0.4601	0.113	0.4422	0.1799
ENSG00000028137	TNFRSF1B	TNF receptor superfamily member 1B [Source:HGNC Symbol;Acc:HGNC:11917]	-0.1424	0.4153	-0.1356	0.5219	-0.1076	0.4875
ENSG00000028203	VEZT	vezatin, adherens junctions transmembrane protein [Source:HGNC Symbol;Acc:HGNC:18258]	-0.09485	0.8027	-0.08714	0.8768	-0.2877	0.3742
ENSG00000028277	POU2F2	POU class 2 homeobox 2 [Source:HGNC Symbol;Acc:HGNC:9213]	0.2841	0.06852	0.291	0.09531	0.2701	0.1535
ENSG00000028310	BRD9	bromodomain containing 9 [Source:HGNC Symbol;Acc:HGNC:25818]	-0.1844	0.2591	-0.1773	0.4176	-0.1808	0.3135
ENSG00000028528	SNX1	sorting nexin 1 [Source:HGNC Symbol;Acc:HGNC:11172]	0.08361	0.6181	0.09028	0.677	0.08763	0.5908
ENSG00000028839	TBPL1	TATA-box binding protein like 1 [Source:HGNC Symbol;Acc:HGNC:11589]	0.1711	0.3289	0.1805	0.4359	0.11	0.5748
ENSG00000029363	BCLAF1	BCL2 associated transcription factor 1 [Source:HGNC Symbol;Acc:HGNC:16863]	0.1685	0.4339	0.1758	0.4767	0.1816	0.4076
ENSG00000029364	SLC39A9	solute carrier family 39 member 9 [Source:HGNC Symbol;Acc:HGNC:20182]	0.008029	0.9744	0.01497	0.9725	-0.005849	0.9813
ENSG00000029639	TFB1M	transcription factor B1, mitochondrial [Source:HGNC Symbol;Acc:HGNC:17037]	-0.3914	0.2021	-0.3835	0.2817	-0.4981	0.117
ENSG00000029725	RABEP1	rabaptin, RAB GTPase binding effector protein 1 [Source:HGNC Symbol;Acc:HGNC:17677]	-0.08054	0.6409	-0.0725	0.7863	-0.109	0.5113
ENSG00000030066	NUP160	nucleoporin 160 [Source:HGNC Symbol;Acc:HGNC:18017]	0.08027	0.6475	0.08743	0.7386	0.06781	0.692
ENSG00000030110	BAK1	BCL2 antagonist/killer 1 [Source:HGNC Symbol;Acc:HGNC:949]	0.04653	0.9046	0.05318	0.9106	0.03998	0.9161
ENSG00000030582	GRN	granulin precursor [Source:HGNC Symbol;Acc:HGNC:4601]	-0.2821	0.2785	-0.275	0.3383	-0.278	0.2681
ENSG00000031003	FAM13B	family with sequence similarity 13 member B [Source:HGNC Symbol;Acc:HGNC:1335]	-0.0388	0.8733	-0.03138	0.9276	-0.06553	0.7452
ENSG00000031081	ARHGAP31	Rho GTPase activating protein 31 [Source:HGNC Symbol;Acc:HGNC:29216]	0.2294	0.6649	0.2359	0.7144	0.1292	0.8332
ENSG00000031698	SARS1	seryl-tRNA synthetase 1 [Source:HGNC Symbol;Acc:HGNC:10537]	-0.134	0.4866	-0.1268	0.6194	-0.1226	0.574
ENSG00000031823	RANBP3	RAN binding protein 3 [Source:HGNC Symbol;Acc:HGNC:9850]	-0.007346	0.9679	-0.0008228	0.9981	0.0163	0.9127
ENSG00000032219	ARID4A	AT-rich interaction domain 4A [Source:HGNC Symbol;Acc:HGNC:9885]	0.07019	0.7241	0.07759	0.7555	0.087	0.6283
ENSG00000032389	EIPR1	EARP complex and GARP complex interacting protein 1 [Source:HGNC Symbol;Acc:HGNC:12383]	0.2756	0.127	0.2809	0.2181	0.2201	0.285
ENSG00000128731	HERC2	HECT and RLD domain containing E3 ubiquitin protein ligase 2 [Source:HGNC Symbol;Acc:HGNC:4868]	2.308	7.635e-05	2.314	0.0001772	2.363	0.02182
ENSG00000032742	IFT88	intraflagellar transport 88 [Source:HGNC Symbol;Acc:HGNC:20606]	-0.372	0.1408	-0.3644	0.188	-0.3981	0.1728
ENSG00000033030	ZCCHC8	zinc finger CCHC-type containing 8 [Source:HGNC Symbol;Acc:HGNC:25265]	0.08325	0.6344	0.09073	0.7164	0.1022	0.5545
ENSG00000033100	CHPF2	chondroitin polymerizing factor 2 [Source:HGNC Symbol;Acc:HGNC:29270]	0.01067	0.9671	0.0173	0.9585	0.04098	0.8125
ENSG00000033178	UBA6	ubiquitin like modifier activating enzyme 6 [Source:HGNC Symbol;Acc:HGNC:25581]	0.005063	0.9907	0.01187	0.9834	-0.05086	0.8773
ENSG00000033327	GAB2	GRB2 associated binding protein 2 [Source:HGNC Symbol;Acc:HGNC:14458]	-0.137	0.3087	-0.1301	0.4848	-0.1211	0.2915
ENSG00000033627	ATP6V0A1	ATPase H+ transporting V0 subunit a1 [Source:HGNC Symbol;Acc:HGNC:865]	-0.1866	0.2466	-0.1796	0.3549	-0.145	0.3854
ENSG00000033800	PIAS1	protein inhibitor of activated STAT 1 [Source:HGNC Symbol;Acc:HGNC:2752]	-0.03182	0.8963	-0.02445	0.9456	-0.008207	0.9736
ENSG00000033867	SLC4A7	solute carrier family 4 member 7 [Source:HGNC Symbol;Acc:HGNC:11033]	-0.1077	0.8336	-0.09941	0.878	-0.1372	0.7918
ENSG00000034152	MAP2K3	mitogen-activated protein kinase kinase 3 [Source:HGNC Symbol;Acc:HGNC:6843]	-0.05111	0.7853	-0.04377	0.8756	-0.01596	0.9331
ENSG00000034533	ASTE1	asteroid homolog 1 [Source:HGNC Symbol;Acc:HGNC:25021]	-0.04272	0.9441	-0.03411	0.9695	-0.0914	0.8466
ENSG00000034677	RNF19A	ring finger protein 19A, RBR E3 ubiquitin protein ligase [Source:HGNC Symbol;Acc:HGNC:13432]	0.1335	0.4234	0.1404	0.497	0.133	0.4132
ENSG00000034713	GABARAPL2	GABA type A receptor associated protein like 2 [Source:HGNC Symbol;Acc:HGNC:13291]	-0.04994	0.6558	-0.04283	0.8371	-0.02578	0.8695
ENSG00000035115	SH3YL1	SH3 and SYLF domain containing 1 [Source:HGNC Symbol;Acc:HGNC:29546]	0.3845	0.3217	0.391	0.3725	0.4444	0.3048
ENSG00000035141	FAM136A	family with sequence similarity 136 member A [Source:HGNC Symbol;Acc:HGNC:25911]	-0.183	0.4153	-0.1766	0.5648	-0.1829	0.3911
ENSG00000035403	VCL	vinculin [Source:HGNC Symbol;Acc:HGNC:12665]	0.1733	0.3024	0.1807	0.3601	0.1872	0.3186
ENSG00000035664	DAPK2	death associated protein kinase 2 [Source:HGNC Symbol;Acc:HGNC:2675]	0.1076	0.6773	0.1146	0.7105	0.1422	0.5812
ENSG00000035681	NSMAF	neutral sphingomyelinase activation associated factor [Source:HGNC Symbol;Acc:HGNC:8017]	-0.0582	0.8226	-0.05111	0.881	-0.06312	0.8197
ENSG00000035687	ADSS2	adenylosuccinate synthase 2 [Source:HGNC Symbol;Acc:HGNC:292]	-0.04208	0.9155	-0.03466	0.9487	-0.09421	0.7902
ENSG00000035720	STAP1	signal transducing adaptor family member 1 [Source:HGNC Symbol;Acc:HGNC:24133]	1.449	0.06505	1.424	0.1459	1.516	0.1998
ENSG00000035862	TIMP2	TIMP metallopeptidase inhibitor 2 [Source:HGNC Symbol;Acc:HGNC:11821]	-0.3405	0.08207	-0.3334	0.114	-0.3413	0.1025
ENSG00000035928	RFC1	replication factor C subunit 1 [Source:HGNC Symbol;Acc:HGNC:9969]	0.2201	0.278	0.2266	0.3666	0.1756	0.4313
ENSG00000036054	TBC1D23	TBC1 domain family member 23 [Source:HGNC Symbol;Acc:HGNC:25622]	-0.08164	0.7405	-0.0738	0.8074	-0.06415	0.788
ENSG00000036257	CUL3	cullin 3 [Source:HGNC Symbol;Acc:HGNC:2553]	0.00772	0.9689	0.01504	0.9601	0.02047	0.8885
ENSG00000036549		zinc finger ZZ-type containing 3 [Source:NCBI gene;Acc:26009]	0.09118	0.7519	0.1035	0.7951	-0.04027	0.9019
ENSG00000037241	RPL26L1	ribosomal protein L26 like 1 [Source:HGNC Symbol;Acc:HGNC:17050]	-0.1868	0.4405	-0.1824	0.5688	-0.1616	0.5012
ENSG00000037474	NSUN2	NOP2/Sun RNA methyltransferase 2 [Source:HGNC Symbol;Acc:HGNC:25994]	-0.08997	0.568	-0.08373	0.7386	-0.09231	0.5709
ENSG00000037637	FBXO42	F-box protein 42 [Source:HGNC Symbol;Acc:HGNC:29249]	0.04459	0.7576	0.05407	0.8281	0.02728	0.8682
ENSG00000037749	MFAP3	microfibril associated protein 3 [Source:HGNC Symbol;Acc:HGNC:7034]	-0.01828	0.9487	-0.01053	0.9807	-0.04216	0.8547
ENSG00000037757	MRI1	methylthioribose-1-phosphate isomerase 1 [Source:HGNC Symbol;Acc:HGNC:28469]	0.1895	0.4161	0.1931	0.5428	0.1501	0.535
ENSG00000038002	AGA	aspartylglucosaminidase [Source:HGNC Symbol;Acc:HGNC:318]	-0.009754	0.9908	-0.003552	0.9985	-0.1399	0.861
ENSG00000088827	SIGLEC1	sialic acid binding Ig like lectin 1 [Source:HGNC Symbol;Acc:HGNC:11127]	2.277	0.02236	2.273	0.08597	2.275	0.1871
ENSG00000038219	BOD1L1	biorientation of chromosomes in cell division 1 like 1 [Source:HGNC Symbol;Acc:HGNC:31792]	-0.1395	0.3289	-0.1322	0.4904	-0.1094	0.4553
ENSG00000038274	MAT2B	methionine adenosyltransferase 2B [Source:HGNC Symbol;Acc:HGNC:6905]	0.08389	0.7497	0.0895	0.7755	0.06091	0.8215
ENSG00000038358	EDC4	enhancer of mRNA decapping 4 [Source:HGNC Symbol;Acc:HGNC:17157]	0.03902	0.8549	0.04657	0.8712	0.05746	0.7814
ENSG00000038382	TRIO	trio Rho guanine nucleotide exchange factor [Source:HGNC Symbol;Acc:HGNC:12303]	0.2165	0.5935	0.2239	0.6265	-0.001653	0.9988
ENSG00000038427	VCAN	versican [Source:HGNC Symbol;Acc:HGNC:2464]	0.1983	0.8696	0.2106	0.8743	0.5966	0.6025
ENSG00000038532	CLEC16A	C-type lectin domain containing 16A [Source:HGNC Symbol;Acc:HGNC:29013]	-0.01912	0.8809	-0.01222	0.9698	-0.01295	0.9317
ENSG00000039123	MTREX	Mtr4 exosome RNA helicase [Source:HGNC Symbol;Acc:HGNC:18734]	0.1184	0.4723	0.1275	0.608	0.07857	0.6834
ENSG00000039319	ZFYVE16	zinc finger FYVE-type containing 16 [Source:HGNC Symbol;Acc:HGNC:20756]	0.0449	0.8473	0.05263	0.8617	0.04167	0.8569
ENSG00000039523	RIPOR1	RHO family interacting cell polarization regulator 1 [Source:HGNC Symbol;Acc:HGNC:25836]	-0.2076	0.3248	-0.2001	0.4036	-0.1656	0.4473
ENSG00000039650	PNKP	polynucleotide kinase 3'-phosphatase [Source:HGNC Symbol;Acc:HGNC:9154]	0.1651	0.2935	0.172	0.3776	0.2205	0.184
ENSG00000040341	STAU2	staufen double-stranded RNA binding protein 2 [Source:HGNC Symbol;Acc:HGNC:11371]	0.0402	0.8475	0.04706	0.8762	0.03865	0.8548
ENSG00000040487	SLC66A1	solute carrier family 66 member 1 [Source:HGNC Symbol;Acc:HGNC:26001]	-0.1233	0.3944	-0.1154	0.6188	-0.1453	0.3298
ENSG00000040531	CTNS	cystinosin, lysosomal cystine transporter [Source:HGNC Symbol;Acc:HGNC:2518]	-0.2444	0.1587	-0.2398	0.2961	-0.2454	0.2086
ENSG00000040633	PHF23	PHD finger protein 23 [Source:HGNC Symbol;Acc:HGNC:28428]	-0.1852	0.4889	-0.1781	0.5817	-0.2011	0.4639
ENSG00000040933	INPP4A	inositol polyphosphate-4-phosphatase type I A [Source:HGNC Symbol;Acc:HGNC:6074]	-0.2927	0.15	-0.2866	0.1996	-0.267	0.2269
ENSG00000041357	PSMA4	proteasome 20S subunit alpha 4 [Source:HGNC Symbol;Acc:HGNC:9533]	0.2018	0.1463	0.2086	0.2283	0.2027	0.1898
ENSG00000041515	MYO16	myosin XVI [Source:HGNC Symbol;Acc:HGNC:29822]	-0.3578	0.7127	-0.3519	0.7361	-0.2744	0.8275
ENSG00000041802	LSG1	large 60S subunit nuclear export GTPase 1 [Source:HGNC Symbol;Acc:HGNC:25652]	-0.01332	0.9708	-0.00627	0.991	-0.001152	0.9981
ENSG00000041880	PARP3	poly(ADP-ribose) polymerase family member 3 [Source:HGNC Symbol;Acc:HGNC:273]	0.384	0.4618	0.386	0.5091	0.1969	0.7955
ENSG00000041982	TNC	tenascin C [Source:HGNC Symbol;Acc:HGNC:5318]	-0.6684	0.1698	-0.6611	0.2421	-0.5273	0.3335
ENSG00000041988	THAP3	THAP domain containing 3 [Source:HGNC Symbol;Acc:HGNC:20855]	-0.06364	0.8828	-0.05617	0.9226	-0.1497	0.6698
ENSG00000042062	RIPOR3	RIPOR family member 3 [Source:HGNC Symbol;Acc:HGNC:16168]	0.4566	0.05526	0.4626	0.09184	0.3566	0.2345
ENSG00000042088	TDP1	tyrosyl-DNA phosphodiesterase 1 [Source:HGNC Symbol;Acc:HGNC:18884]	0.02007	0.9744	0.02797	0.9737	-0.182	0.6515
ENSG00000042445	RETSAT	retinol saturase [Source:HGNC Symbol;Acc:HGNC:25991]	0.2526	0.239	0.2586	0.3038	0.2802	0.2324
ENSG00000042493	CAPG	capping actin protein, gelsolin like [Source:HGNC Symbol;Acc:HGNC:1474]	-0.02197	0.9583	-0.01545	0.9792	-0.04525	0.9007
ENSG00000042753	AP2S1	adaptor related protein complex 2 subunit sigma 1 [Source:HGNC Symbol;Acc:HGNC:565]	-0.1108	0.5162	-0.1068	0.6887	-0.1049	0.5451
ENSG00000160932	LY6E	lymphocyte antigen 6 family member E [Source:HGNC Symbol;Acc:HGNC:6727]	2.172	0.02024	2.168	0.1097	2.188	0.09767
ENSG00000042980	ADAM28	ADAM metallopeptidase domain 28 [Source:HGNC Symbol;Acc:HGNC:206]	0.5632	0.178	0.5703	0.2204	0.6797	0.1558
ENSG00000043093	DCUN1D1	defective in cullin neddylation 1 domain containing 1 [Source:HGNC Symbol;Acc:HGNC:18184]	-0.135	0.5716	-0.1276	0.6601	-0.1545	0.5012
ENSG00000043143	JADE2	jade family PHD finger 2 [Source:HGNC Symbol;Acc:HGNC:22984]	-0.02034	0.9695	-0.01424	0.9824	-0.04309	0.918
ENSG00000043462	LCP2	lymphocyte cytosolic protein 2 [Source:HGNC Symbol;Acc:HGNC:6529]	-0.1882	0.3625	-0.1826	0.4566	-0.1519	0.3911
ENSG00000044090	CUL7	cullin 7 [Source:HGNC Symbol;Acc:HGNC:21024]	-0.01713	0.9744	-0.0128	0.9871	-0.1636	0.6497
ENSG00000044115	CTNNA1	catenin alpha 1 [Source:HGNC Symbol;Acc:HGNC:2509]	-0.1371	0.735	-0.1303	0.7858	-0.06554	0.893
ENSG00000044446	PHKA2	phosphorylase kinase regulatory subunit alpha 2 [Source:HGNC Symbol;Acc:HGNC:8926]	0.1075	0.4343	0.1148	0.536	0.125	0.3551
ENSG00000089012	SIRPG	signal regulatory protein gamma [Source:HGNC Symbol;Acc:HGNC:15757]	2.171	0.04466	2.167	0.08605	0.6634	0.798
ENSG00000044574	HSPA5	heat shock protein family A (Hsp70) member 5 [Source:HGNC Symbol;Acc:HGNC:5238]	0.02228	0.9567	0.02961	0.9537	0.03389	0.924
ENSG00000046651	OFD1	OFD1 centriole and centriolar satellite protein [Source:HGNC Symbol;Acc:HGNC:2567]	0.1747	0.2282	0.1823	0.367	0.1444	0.3576
ENSG00000047056	WDR37	WD repeat domain 37 [Source:HGNC Symbol;Acc:HGNC:31406]	-0.01836	0.9035	-0.01041	0.9737	-0.005148	0.9761
ENSG00000047188	YTHDC2	YTH domain containing 2 [Source:HGNC Symbol;Acc:HGNC:24721]	-0.1349	0.6534	-0.1283	0.728	-0.1579	0.5658
ENSG00000047249	ATP6V1H	ATPase H+ transporting V1 subunit H [Source:HGNC Symbol;Acc:HGNC:18303]	0.0496	0.7906	0.05707	0.8328	0.0233	0.9093
ENSG00000143079	CTTNBP2NL	CTTNBP2 N-terminal like [Source:HGNC Symbol;Acc:HGNC:25330]	2.124	0.02944	2.078	0.05077	1.404	0.285
ENSG00000047346	FAM214A	family with sequence similarity 214 member A [Source:HGNC Symbol;Acc:HGNC:25609]	0.02935	0.9376	0.03617	0.9329	0.01283	0.9736
ENSG00000047365	ARAP2	ArfGAP with RhoGAP domain, ankyrin repeat and PH domain 2 [Source:HGNC Symbol;Acc:HGNC:16924]	0.1198	0.7407	0.1266	0.7564	0.09878	0.8008
ENSG00000047410	TPR	translocated promoter region, nuclear basket protein [Source:HGNC Symbol;Acc:HGNC:12017]	0.06438	0.5939	0.0713	0.7322	0.09234	0.4608
ENSG00000047578	KIAA0556	KIAA0556 [Source:HGNC Symbol;Acc:HGNC:29068]	-0.07146	0.6655	-0.06427	0.7951	-0.04113	0.8275
ENSG00000047579	DTNBP1	dystrobrevin binding protein 1 [Source:HGNC Symbol;Acc:HGNC:17328]	0.1292	0.5542	0.1359	0.6204	0.09683	0.6833
ENSG00000047621	C12orf4	chromosome 12 open reading frame 4 [Source:HGNC Symbol;Acc:HGNC:1184]	0.1916	0.6321	0.1967	0.6672	0.06259	0.91
ENSG00000047634	SCML1	Scm polycomb group protein like 1 [Source:HGNC Symbol;Acc:HGNC:10580]	0.5563	0.09289	0.5631	0.105	0.5217	0.2122
ENSG00000047644	WWC3	WWC family member 3 [Source:HGNC Symbol;Acc:HGNC:29237]	0.0704	0.65	0.07718	0.7363	0.07149	0.6404
ENSG00000047662	FAM184B	family with sequence similarity 184 member B [Source:HGNC Symbol;Acc:HGNC:29235]	0.1486	0.5597	0.1561	0.6194	0.09544	0.7309
ENSG00000047849	MAP4	microtubule associated protein 4 [Source:HGNC Symbol;Acc:HGNC:6862]	-0.04155	0.8588	-0.03734	0.9228	-0.044	0.8491
ENSG00000047932	GOPC	golgi associated PDZ and coiled-coil motif containing [Source:HGNC Symbol;Acc:HGNC:17643]	0.2472	0.1893	0.2577	0.3066	0.1864	0.38
ENSG00000048028	USP28	ubiquitin specific peptidase 28 [Source:HGNC Symbol;Acc:HGNC:12625]	0.1432	0.5936	0.1509	0.6636	0.04913	0.8775
ENSG00000048052	HDAC9	histone deacetylase 9 [Source:HGNC Symbol;Acc:HGNC:14065]	-0.1874	0.5979	-0.1794	0.6693	-0.2326	0.5322
ENSG00000048140	TSPAN17	tetraspanin 17 [Source:HGNC Symbol;Acc:HGNC:13594]	-0.1536	0.7531	-0.1482	0.8007	-0.3837	0.3737
ENSG00000048342	CC2D2A	coiled-coil and C2 domain containing 2A [Source:HGNC Symbol;Acc:HGNC:29253]	0.3981	0.1436	0.4032	0.171	0.4207	0.1888
ENSG00000048392	RRM2B	ribonucleotide reductase regulatory TP53 inducible subunit M2B [Source:HGNC Symbol;Acc:HGNC:17296]	-0.02871	0.9137	-0.02179	0.9538	-0.03615	0.8775
ENSG00000048405	ZNF800	zinc finger protein 800 [Source:HGNC Symbol;Acc:HGNC:27267]	0.104	0.6252	0.1118	0.679	0.08845	0.6827
ENSG00000048471	SNX29	sorting nexin 29 [Source:HGNC Symbol;Acc:HGNC:30542]	0.02723	0.8963	0.03588	0.9076	0.002559	0.9924
ENSG00000048544	MRPS10	mitochondrial ribosomal protein S10 [Source:HGNC Symbol;Acc:HGNC:14502]	0.09294	0.7668	0.1004	0.8003	-0.02079	0.954
ENSG00000048649	RSF1	remodeling and spacing factor 1 [Source:HGNC Symbol;Acc:HGNC:18118]	0.1129	0.531	0.1204	0.5817	0.1085	0.5181
ENSG00000048707	VPS13D	vacuolar protein sorting 13 homolog D [Source:HGNC Symbol;Acc:HGNC:23595]	-0.07114	0.7287	-0.06405	0.8104	-0.06967	0.7365
ENSG00000048740	CELF2	CUGBP Elav-like family member 2 [Source:HGNC Symbol;Acc:HGNC:2550]	0.05196	0.7058	0.05885	0.7695	0.119	0.3732
ENSG00000048828	FAM120A	family with sequence similarity 120A [Source:HGNC Symbol;Acc:HGNC:13247]	0.1933	0.1561	0.1997	0.2553	0.2041	0.144
ENSG00000048991	R3HDM1	R3H domain containing 1 [Source:HGNC Symbol;Acc:HGNC:9757]	-0.07257	0.629	-0.06393	0.8195	-0.1182	0.3808
ENSG00000049089	COL9A2	collagen type IX alpha 2 chain [Source:HGNC Symbol;Acc:HGNC:2218]	0.009327	0.9908	0.01289	0.991	0.0008101	0.9993
ENSG00000049239	H6PD	hexose-6-phosphate dehydrogenase/glucose 1-dehydrogenase [Source:HGNC Symbol;Acc:HGNC:4795]	-0.3066	0.2106	-0.2978	0.2733	-0.3435	0.179
ENSG00000049245	VAMP3	vesicle associated membrane protein 3 [Source:HGNC Symbol;Acc:HGNC:12644]	0.04449	0.7607	0.05162	0.8096	0.04757	0.7571
ENSG00000049246	PER3	period circadian regulator 3 [Source:HGNC Symbol;Acc:HGNC:8847]	-0.01658	0.9859	-0.009437	0.9939	-0.1794	0.8125
ENSG00000049247	UTS2	urotensin 2 [Source:HGNC Symbol;Acc:HGNC:12636]	-0.3633	0.8434	-0.3567	0.8523	-1.334	0.4983
ENSG00000049249	TNFRSF9	TNF receptor superfamily member 9 [Source:HGNC Symbol;Acc:HGNC:11924]	-0.113	0.8438	-0.1041	0.881	0.01219	0.9874
ENSG00000049541	RFC2	replication factor C subunit 2 [Source:HGNC Symbol;Acc:HGNC:9970]	-0.253	0.2364	-0.2459	0.3354	-0.2385	0.2988
ENSG00000049618	ARID1B	AT-rich interaction domain 1B [Source:HGNC Symbol;Acc:HGNC:18040]	0.06811	0.6068	0.07474	0.7105	0.07655	0.5592
ENSG00000049656	CLPTM1L	CLPTM1 like [Source:HGNC Symbol;Acc:HGNC:24308]	-0.1318	0.3395	-0.1243	0.5488	-0.133	0.3778
ENSG00000049769	PPP1R3F	protein phosphatase 1 regulatory subunit 3F [Source:HGNC Symbol;Acc:HGNC:14944]	0.4138	0.1123	0.4188	0.1916	0.3282	0.2841
ENSG00000049860	HEXB	hexosaminidase subunit beta [Source:HGNC Symbol;Acc:HGNC:4879]	-0.3058	0.1368	-0.3004	0.2075	-0.3019	0.1814
ENSG00000050130	JKAMP	JNK1/MAPK8 associated membrane protein [Source:HGNC Symbol;Acc:HGNC:20184]	0.1093	0.5519	0.1167	0.625	0.07143	0.7223
ENSG00000050344	NFE2L3	nuclear factor, erythroid 2 like 3 [Source:HGNC Symbol;Acc:HGNC:7783]	0.05681	0.862	0.06241	0.8864	0.04222	0.908
ENSG00000050426	LETMD1	LETM1 domain containing 1 [Source:HGNC Symbol;Acc:HGNC:24241]	0.03251	0.9061	0.04078	0.915	-0.03736	0.8824
ENSG00000050748	MAPK9	mitogen-activated protein kinase 9 [Source:HGNC Symbol;Acc:HGNC:6886]	0.2197	0.3857	0.2268	0.4511	0.179	0.5083
ENSG00000188157	AGRN	agrin [Source:HGNC Symbol;Acc:HGNC:329]	2.074	0.003771	2.075	0.008294	1.897	0.07472
ENSG00000051009	FAM160A2	family with sequence similarity 160 member A2 [Source:HGNC Symbol;Acc:HGNC:25378]	-0.02241	0.9463	-0.0149	0.975	-0.005994	0.9852
ENSG00000051108	HERPUD1	homocysteine inducible ER protein with ubiquitin like domain 1 [Source:HGNC Symbol;Acc:HGNC:13744]	0.153	0.2961	0.1602	0.3951	0.1809	0.2699
ENSG00000051128	HOMER3	homer scaffold protein 3 [Source:HGNC Symbol;Acc:HGNC:17514]	-0.3595	0.3143	-0.3508	0.3849	-0.6754	0.1301
ENSG00000051382	PIK3CB	phosphatidylinositol-4,5-bisphosphate 3-kinase catalytic subunit beta [Source:HGNC Symbol;Acc:HGNC:8976]	-0.2649	0.1553	-0.259	0.2304	-0.2925	0.169
ENSG00000051523	CYBA	cytochrome b-245 alpha chain [Source:HGNC Symbol;Acc:HGNC:2577]	0.03373	0.8931	0.04112	0.8996	0.06268	0.7594
ENSG00000051620	HEBP2	heme binding protein 2 [Source:HGNC Symbol;Acc:HGNC:15716]	-0.0845	0.6734	-0.07799	0.7718	-0.06617	0.7746
ENSG00000052723	SIKE1	suppressor of IKBKE 1 [Source:HGNC Symbol;Acc:HGNC:26119]	0.01631	0.9487	0.0243	0.948	-0.005708	0.9821
ENSG00000052749	RRP12	ribosomal RNA processing 12 homolog [Source:HGNC Symbol;Acc:HGNC:29100]	5.858e-06	1	0.007397	0.991	0.04578	0.8991
ENSG00000052795	FNIP2	folliculin interacting protein 2 [Source:HGNC Symbol;Acc:HGNC:29280]	0.1739	0.65	0.1782	0.7198	0.1191	0.7647
ENSG00000052802	MSMO1	methylsterol monooxygenase 1 [Source:HGNC Symbol;Acc:HGNC:10545]	0.07816	0.8951	0.08482	0.9011	-0.02489	0.972
ENSG00000052841	TTC17	tetratricopeptide repeat domain 17 [Source:HGNC Symbol;Acc:HGNC:25596]	0.04679	0.7042	0.05478	0.7886	0.0457	0.7212
ENSG00000053108	FSTL4	follistatin like 4 [Source:HGNC Symbol;Acc:HGNC:21389]	-1.403	0.09027	-1.392	0.1155	-0.8538	0.5081
ENSG00000053254	FOXN3	forkhead box N3 [Source:HGNC Symbol;Acc:HGNC:1928]	-0.06612	0.7398	-0.06009	0.8281	-0.06609	0.7176
ENSG00000168280	KIF5C	kinesin family member 5C [Source:HGNC Symbol;Acc:HGNC:6325]	2.069	0.005801	2.053	0.02056	1.366	0.2104
ENSG00000053501	USE1	unconventional SNARE in the ER 1 [Source:HGNC Symbol;Acc:HGNC:30882]	0.08302	0.8185	0.08359	0.871	0.06504	0.8502
ENSG00000053524	MCF2L2	MCF.2 cell line derived transforming sequence-like 2 [Source:HGNC Symbol;Acc:HGNC:30319]	-0.07611	0.8495	-0.06878	0.8908	-0.133	0.7226
ENSG00000053770	AP5M1	adaptor related protein complex 5 subunit mu 1 [Source:HGNC Symbol;Acc:HGNC:20192]	-0.1409	0.4758	-0.134	0.6204	-0.1534	0.4378
ENSG00000053900	ANAPC4	anaphase promoting complex subunit 4 [Source:HGNC Symbol;Acc:HGNC:19990]	0.1897	0.4874	0.1954	0.5399	0.1192	0.6909
ENSG00000053918	KCNQ1	potassium voltage-gated channel subfamily Q member 1 [Source:HGNC Symbol;Acc:HGNC:6294]	-0.04986	0.8053	-0.04246	0.8798	-0.01965	0.9315
ENSG00000054116	TRAPPC3	trafficking protein particle complex 3 [Source:HGNC Symbol;Acc:HGNC:19942]	-0.05739	0.7152	-0.05218	0.8448	-0.04774	0.7719
ENSG00000054118	THRAP3	thyroid hormone receptor associated protein 3 [Source:HGNC Symbol;Acc:HGNC:22964]	-0.1774	0.2087	-0.1704	0.3549	-0.164	0.2472
ENSG00000054179	ENTPD2	ectonucleoside triphosphate diphosphohydrolase 2 [Source:HGNC Symbol;Acc:HGNC:3364]	-0.6073	0.2679	-0.599	0.3793	-0.3909	0.5896
ENSG00000054267	ARID4B	AT-rich interaction domain 4B [Source:HGNC Symbol;Acc:HGNC:15550]	0.129	0.3512	0.1357	0.4705	0.1369	0.2681
ENSG00000054282	SDCCAG8	serologically defined colon cancer antigen 8 [Source:HGNC Symbol;Acc:HGNC:10671]	0.3367	0.1307	0.3424	0.1906	0.304	0.2518
ENSG00000054523	KIF1B	kinesin family member 1B [Source:HGNC Symbol;Acc:HGNC:16636]	0.2823	0.05545	0.2893	0.08605	0.2933	0.07526
ENSG00000054611	TBC1D22A	TBC1 domain family member 22A [Source:HGNC Symbol;Acc:HGNC:1309]	0.03805	0.7557	0.04512	0.8327	0.06181	0.6225
ENSG00000054654	SYNE2	spectrin repeat containing nuclear envelope protein 2 [Source:HGNC Symbol;Acc:HGNC:17084]	0.08732	0.8914	0.09476	0.898	0.1052	0.8675
ENSG00000054793	ATP9A	ATPase phospholipid transporting 9A (putative) [Source:HGNC Symbol;Acc:HGNC:13540]	-0.2514	0.7462	-0.2408	0.7962	-0.754	0.2729
ENSG00000054965	FAM168A	family with sequence similarity 168 member A [Source:HGNC Symbol;Acc:HGNC:28999]	-0.02237	0.9263	-0.01574	0.9704	-0.01869	0.9353
ENSG00000054967	RELT	RELT TNF receptor [Source:HGNC Symbol;Acc:HGNC:13764]	-0.04765	0.7992	-0.04012	0.8806	0.003527	0.987
ENSG00000142494	SLC47A1	solute carrier family 47 member 1 [Source:HGNC Symbol;Acc:HGNC:25588]	2.059	0.04229	2.05	0.1326	0.05421	0.9776
ENSG00000055044	NOP58	NOP58 ribonucleoprotein [Source:HGNC Symbol;Acc:HGNC:29926]	0.1797	0.6416	0.1899	0.7058	0.01982	0.9696
ENSG00000055070	SZRD1	SUZ RNA binding domain containing 1 [Source:HGNC Symbol;Acc:HGNC:30232]	0.05679	0.8722	0.06338	0.8885	-0.005435	0.9914
ENSG00000055130	CUL1	cullin 1 [Source:HGNC Symbol;Acc:HGNC:2551]	-0.04842	0.8475	-0.03986	0.9197	-0.09651	0.6647
ENSG00000055147	FAM114A2	family with sequence similarity 114 member A2 [Source:HGNC Symbol;Acc:HGNC:1333]	0.09545	0.7224	0.1053	0.7574	-0.01034	0.9772
ENSG00000055163	CYFIP2	cytoplasmic FMR1 interacting protein 2 [Source:HGNC Symbol;Acc:HGNC:13760]	-0.08821	0.6317	-0.08074	0.7478	-0.05288	0.7871
ENSG00000055208	TAB2	TGF-beta activated kinase 1 (MAP3K7) binding protein 2 [Source:HGNC Symbol;Acc:HGNC:17075]	-0.134	0.5201	-0.1276	0.6199	-0.1324	0.4847
ENSG00000055211	GINM1	glycoprotein integral membrane 1 [Source:HGNC Symbol;Acc:HGNC:21074]	-0.0366	0.8207	-0.02719	0.9255	-0.03949	0.8036
ENSG00000055332	EIF2AK2	eukaryotic translation initiation factor 2 alpha kinase 2 [Source:HGNC Symbol;Acc:HGNC:9437]	0.7518	0.1212	0.7573	0.1084	0.6752	0.2034
ENSG00000055483		ubiquitin specific peptidase 36 [Source:NCBI gene;Acc:57602]	-0.3205	0.2096	-0.3152	0.297	-0.2574	0.356
ENSG00000055609	KMT2C	lysine methyltransferase 2C [Source:HGNC Symbol;Acc:HGNC:13726]	-0.1193	0.3087	-0.112	0.5329	-0.08589	0.4589
ENSG00000055917	PUM2	pumilio RNA binding family member 2 [Source:HGNC Symbol;Acc:HGNC:14958]	-0.09433	0.4691	-0.08682	0.66	-0.08164	0.5616
ENSG00000055950	MRPL43	mitochondrial ribosomal protein L43 [Source:HGNC Symbol;Acc:HGNC:14517]	-0.04508	0.8896	-0.04188	0.9293	-0.03751	0.9103
ENSG00000056097	ZFR	zinc finger RNA binding protein [Source:HGNC Symbol;Acc:HGNC:17277]	0.06291	0.7565	0.07167	0.7987	0.02454	0.9161
ENSG00000056558	TRAF1	TNF receptor associated factor 1 [Source:HGNC Symbol;Acc:HGNC:12031]	0.2305	0.5672	0.2392	0.6091	0.3058	0.3964
ENSG00000056586	RC3H2	ring finger and CCCH-type domains 2 [Source:HGNC Symbol;Acc:HGNC:21461]	-0.02606	0.8823	-0.01776	0.9544	-0.03169	0.8466
ENSG00000056972	TRAF3IP2	TRAF3 interacting protein 2 [Source:HGNC Symbol;Acc:HGNC:1343]	-0.02554	0.9418	-0.01859	0.9737	-0.03751	0.9076
ENSG00000057252	SOAT1	sterol O-acyltransferase 1 [Source:HGNC Symbol;Acc:HGNC:11177]	0.2597	0.2618	0.2659	0.2956	0.2214	0.3899
ENSG00000057608	GDI2	GDP dissociation inhibitor 2 [Source:HGNC Symbol;Acc:HGNC:4227]	-0.05683	0.7547	-0.05042	0.8459	-0.05376	0.7781
ENSG00000057663	ATG5	autophagy related 5 [Source:HGNC Symbol;Acc:HGNC:589]	0.1385	0.3552	0.1458	0.4858	0.1139	0.4768
ENSG00000057704	TMCC3	transmembrane and coiled-coil domain family 3 [Source:HGNC Symbol;Acc:HGNC:29199]	-0.2382	0.3394	-0.232	0.4162	-0.2365	0.3233
ENSG00000057757	PITHD1	PITH domain containing 1 [Source:HGNC Symbol;Acc:HGNC:25022]	-0.0687	0.6976	-0.06288	0.8188	-0.06652	0.718
ENSG00000058063	ATP11B	ATPase phospholipid transporting 11B (putative) [Source:HGNC Symbol;Acc:HGNC:13553]	-0.01114	0.9744	-0.003994	0.9936	0.005996	0.9845
ENSG00000058091	CDK14	cyclin dependent kinase 14 [Source:HGNC Symbol;Acc:HGNC:8883]	0.09964	0.6404	0.1068	0.67	0.1267	0.5356
ENSG00000058262	SEC61A1	SEC61 translocon alpha 1 subunit [Source:HGNC Symbol;Acc:HGNC:18276]	-0.05554	0.7426	-0.0477	0.8748	-0.114	0.4535
ENSG00000058272	PPP1R12A	protein phosphatase 1 regulatory subunit 12A [Source:HGNC Symbol;Acc:HGNC:7618]	0.09217	0.473	0.09946	0.6033	0.09301	0.4771
ENSG00000058453	CROCC	ciliary rootlet coiled-coil, rootletin [Source:HGNC Symbol;Acc:HGNC:21299]	-0.003425	0.9953	0.002565	0.9981	0.00971	0.9906
ENSG00000058600	POLR3E	RNA polymerase III subunit E [Source:HGNC Symbol;Acc:HGNC:30347]	0.4112	0.1921	0.4186	0.237	0.4491	0.2122
ENSG00000058668	ATP2B4	ATPase plasma membrane Ca2+ transporting 4 [Source:HGNC Symbol;Acc:HGNC:817]	-0.09932	0.7665	-0.09343	0.8141	-0.08307	0.8125
ENSG00000058799	YIPF1	Yip1 domain family member 1 [Source:HGNC Symbol;Acc:HGNC:25231]	-0.09538	0.4895	-0.08828	0.6684	-0.07814	0.605
ENSG00000058866	DGKG	diacylglycerol kinase gamma [Source:HGNC Symbol;Acc:HGNC:2853]	-0.3637	0.4065	-0.3568	0.4757	-0.0927	0.8745
ENSG00000059122	FLYWCH1	FLYWCH-type zinc finger 1 [Source:HGNC Symbol;Acc:HGNC:25404]	0.09855	0.8653	0.1056	0.8802	-0.1381	0.8105
ENSG00000059145	UNKL	unk like zinc finger [Source:HGNC Symbol;Acc:HGNC:14184]	0.08005	0.6815	0.08737	0.726	0.1014	0.5535
ENSG00000059377	TBXAS1	thromboxane A synthase 1 [Source:HGNC Symbol;Acc:HGNC:11609]	-0.1501	0.225	-0.1425	0.4105	-0.09917	0.5374
ENSG00000059378	PARP12	poly(ADP-ribose) polymerase family member 12 [Source:HGNC Symbol;Acc:HGNC:21919]	0.8111	0.09644	0.8164	0.09415	0.6703	0.2206
ENSG00000059588	TARBP1	TAR (HIV-1) RNA binding protein 1 [Source:HGNC Symbol;Acc:HGNC:11568]	1.074	0.08475	1.072	0.1165	1.028	0.2285
ENSG00000059728	MXD1	MAX dimerization protein 1 [Source:HGNC Symbol;Acc:HGNC:6761]	0.03909	0.8697	0.04531	0.8762	0.0594	0.7693
ENSG00000059758	CDK17	cyclin dependent kinase 17 [Source:HGNC Symbol;Acc:HGNC:8750]	0.2931	0.2736	0.3004	0.2845	0.2366	0.3872
ENSG00000059804	SLC2A3	solute carrier family 2 member 3 [Source:HGNC Symbol;Acc:HGNC:11007]	0.03825	0.9192	0.04516	0.9196	0.09924	0.7541
ENSG00000059915	PSD	pleckstrin and Sec7 domain containing [Source:HGNC Symbol;Acc:HGNC:9507]	0.2421	0.552	0.2491	0.6064	0.2431	0.5528
ENSG00000060069	CTDP1	CTD phosphatase subunit 1 [Source:HGNC Symbol;Acc:HGNC:2498]	-0.1012	0.6994	-0.09346	0.7655	-0.1002	0.677
ENSG00000060138	YBX3	Y-box binding protein 3 [Source:HGNC Symbol;Acc:HGNC:2428]	-0.1249	0.8211	-0.1176	0.8648	-0.2248	0.6472
ENSG00000060237	WNK1	WNK lysine deficient protein kinase 1 [Source:HGNC Symbol;Acc:HGNC:14540]	-0.07179	0.6828	-0.065	0.7991	-0.05895	0.7322
ENSG00000060339	CCAR1	cell division cycle and apoptosis regulator 1 [Source:HGNC Symbol;Acc:HGNC:24236]	0.008099	0.9744	0.01903	0.9602	-0.04795	0.7862
ENSG00000060491	OGFR	opioid growth factor receptor [Source:HGNC Symbol;Acc:HGNC:15768]	0.0856	0.7483	0.09198	0.7704	0.1144	0.5894
ENSG00000060558	GNA15	G protein subunit alpha 15 [Source:HGNC Symbol;Acc:HGNC:4383]	-0.09393	0.7726	-0.08588	0.8292	-0.06792	0.8503
ENSG00000060642	PIGV	phosphatidylinositol glycan anchor biosynthesis class V [Source:HGNC Symbol;Acc:HGNC:26031]	-0.05259	0.8474	-0.04972	0.902	-0.04577	0.862
ENSG00000060688	SNRNP40	small nuclear ribonucleoprotein U5 subunit 40 [Source:HGNC Symbol;Acc:HGNC:30857]	-0.03159	0.9236	-0.02559	0.9609	-0.05896	0.8343
ENSG00000060749	QSER1	glutamine and serine rich 1 [Source:HGNC Symbol;Acc:HGNC:26154]	0.09631	0.8116	0.1038	0.8448	-0.02433	0.9576
ENSG00000060762	MPC1	mitochondrial pyruvate carrier 1 [Source:HGNC Symbol;Acc:HGNC:21606]	-0.1575	0.5162	-0.15	0.6158	-0.1213	0.638
ENSG00000060971	ACAA1	acetyl-CoA acyltransferase 1 [Source:HGNC Symbol;Acc:HGNC:82]	-0.1119	0.4781	-0.1049	0.628	-0.09047	0.6025
ENSG00000184979	USP18	ubiquitin specific peptidase 18 [Source:HGNC Symbol;Acc:HGNC:12616]	2.04	0.03903	2.035	0.1048	1.899	0.2401
ENSG00000061273	HDAC7	histone deacetylase 7 [Source:HGNC Symbol;Acc:HGNC:14067]	-0.1301	0.5407	-0.1223	0.6515	-0.08867	0.6978
ENSG00000061656	SPAG4	sperm associated antigen 4 [Source:HGNC Symbol;Acc:HGNC:11214]	0.1818	0.7159	0.1892	0.7478	0.02706	0.9651
ENSG00000061936	SFSWAP	splicing factor SWAP [Source:HGNC Symbol;Acc:HGNC:10790]	-0.07635	0.5267	-0.06937	0.7319	-0.05205	0.7087
ENSG00000134824	FADS2	fatty acid desaturase 2 [Source:HGNC Symbol;Acc:HGNC:3575]	1.945	0.01609	1.945	0.05357	1.022	0.4549
ENSG00000061987	MON2	MON2 homolog, regulator of endosome-to-Golgi trafficking [Source:HGNC Symbol;Acc:HGNC:29177]	-0.0453	0.8373	-0.03764	0.9011	-0.0514	0.8125
ENSG00000062194	GPBP1	GC-rich promoter binding protein 1 [Source:HGNC Symbol;Acc:HGNC:29520]	0.004721	0.9874	0.01141	0.9792	0.004383	0.9874
ENSG00000174989	FBXW8	F-box and WD repeat domain containing 8 [Source:HGNC Symbol;Acc:HGNC:13597]	1.941	1.995e-07	1.947	1.545e-06	2.093	0.004808
ENSG00000062485	CS	citrate synthase [Source:HGNC Symbol;Acc:HGNC:2422]	-0.04209	0.8546	-0.03422	0.9172	-0.04619	0.8386
ENSG00000062598	ELMO2	engulfment and cell motility 2 [Source:HGNC Symbol;Acc:HGNC:17233]	-0.02559	0.9357	-0.01844	0.9686	6.037e-05	0.9999
ENSG00000062650	WAPL	WAPL cohesin release factor [Source:HGNC Symbol;Acc:HGNC:23293]	-0.1365	0.2645	-0.1289	0.4415	-0.1356	0.2722
ENSG00000062716	VMP1	vacuole membrane protein 1 [Source:HGNC Symbol;Acc:HGNC:29559]	-0.1017	0.3217	-0.09529	0.5753	-0.07564	0.5868
ENSG00000062725	APPBP2	amyloid beta precursor protein binding protein 2 [Source:HGNC Symbol;Acc:HGNC:622]	-0.04471	0.8267	-0.0364	0.9085	-0.08339	0.64
ENSG00000062822	POLD1	DNA polymerase delta 1, catalytic subunit [Source:HGNC Symbol;Acc:HGNC:9175]	0.02824	0.9499	0.03177	0.9607	-0.01076	0.981
ENSG00000063046	EIF4B	eukaryotic translation initiation factor 4B [Source:HGNC Symbol;Acc:HGNC:3285]	0.05328	0.8003	0.0609	0.8188	0.05036	0.7928
ENSG00000063127	SLC6A16	solute carrier family 6 member 16 [Source:HGNC Symbol;Acc:HGNC:13622]	0.01828	0.9741	0.02544	0.9726	-0.002539	0.9967
ENSG00000063169	BICRA	BRD4 interacting chromatin remodeling complex associated protein [Source:HGNC Symbol;Acc:HGNC:4332]	0.1967	0.2794	0.2041	0.3346	0.2195	0.2328
ENSG00000063176	SPHK2	sphingosine kinase 2 [Source:HGNC Symbol;Acc:HGNC:18859]	-0.1468	0.6535	-0.1422	0.7443	-0.2634	0.3661
ENSG00000063177	RPL18	ribosomal protein L18 [Source:HGNC Symbol;Acc:HGNC:10310]	-0.1053	0.6833	-0.0969	0.7646	-0.1036	0.7119
ENSG00000063244	U2AF2	U2 small nuclear RNA auxiliary factor 2 [Source:HGNC Symbol;Acc:HGNC:23156]	0.03756	0.7864	0.04439	0.8454	0.072	0.5736
ENSG00000063245	EPN1	epsin 1 [Source:HGNC Symbol;Acc:HGNC:21604]	-0.07249	0.7257	-0.06473	0.8088	-0.01185	0.9597
ENSG00000063322	MED29	mediator complex subunit 29 [Source:HGNC Symbol;Acc:HGNC:23074]	-0.0615	0.5993	-0.05502	0.7948	-0.0332	0.8116
ENSG00000063601	MTMR1	myotubularin related protein 1 [Source:HGNC Symbol;Acc:HGNC:7449]	0.09961	0.7429	0.1065	0.7538	0.1112	0.693
ENSG00000063854	HAGH	hydroxyacylglutathione hydrolase [Source:HGNC Symbol;Acc:HGNC:4805]	-0.1704	0.4555	-0.1635	0.5875	-0.1749	0.4318
ENSG00000063978	RNF4	ring finger protein 4 [Source:HGNC Symbol;Acc:HGNC:10067]	-0.09547	0.3924	-0.08899	0.6272	-0.08757	0.4918
ENSG00000064012	CASP8	caspase 8 [Source:HGNC Symbol;Acc:HGNC:1509]	0.1526	0.371	0.1598	0.4471	0.1754	0.3221
ENSG00000064102	INTS13	integrator complex subunit 13 [Source:HGNC Symbol;Acc:HGNC:20174]	-0.0765	0.8003	-0.0664	0.881	-0.1667	0.5228
ENSG00000064115	TM7SF3	transmembrane 7 superfamily member 3 [Source:HGNC Symbol;Acc:HGNC:23049]	-0.09055	0.6952	-0.0833	0.8017	-0.09957	0.6402
ENSG00000064201	TSPAN32	tetraspanin 32 [Source:HGNC Symbol;Acc:HGNC:13410]	0.1789	0.4589	0.185	0.537	0.1744	0.5045
ENSG00000064225	ST3GAL6	ST3 beta-galactoside alpha-2,3-sialyltransferase 6 [Source:HGNC Symbol;Acc:HGNC:18080]	-0.1364	0.6927	-0.1298	0.7453	-0.1615	0.6168
ENSG00000064270	ATP2C2	ATPase secretory pathway Ca2+ transporting 2 [Source:HGNC Symbol;Acc:HGNC:29103]	0.1494	0.7906	0.157	0.8146	0.04618	0.947
ENSG00000064313	TAF2	TATA-box binding protein associated factor 2 [Source:HGNC Symbol;Acc:HGNC:11536]	-0.1922	0.2526	-0.1845	0.3811	-0.2082	0.2309
ENSG00000064393	HIPK2	homeodomain interacting protein kinase 2 [Source:HGNC Symbol;Acc:HGNC:14402]	0.03597	0.8583	0.04321	0.8757	0.05019	0.7848
ENSG00000064419	TNPO3	transportin 3 [Source:HGNC Symbol;Acc:HGNC:17103]	-0.07817	0.6644	-0.07046	0.7733	-0.07878	0.6281
ENSG00000064490	RFXANK	regulatory factor X associated ankyrin containing protein [Source:HGNC Symbol;Acc:HGNC:9987]	0.1499	0.4706	0.1562	0.5677	0.1532	0.4847
ENSG00000064547	LPAR2	lysophosphatidic acid receptor 2 [Source:HGNC Symbol;Acc:HGNC:3168]	-0.1403	0.4742	-0.1329	0.6016	-0.1413	0.4958
ENSG00000064601	CTSA	cathepsin A [Source:HGNC Symbol;Acc:HGNC:9251]	-0.07291	0.7391	-0.06679	0.8094	-0.06648	0.7305
ENSG00000064607	SUGP2	SURP and G-patch domain containing 2 [Source:HGNC Symbol;Acc:HGNC:18641]	-0.04683	0.75	-0.03971	0.871	-0.03609	0.8345
ENSG00000071575	TRIB2	tribbles pseudokinase 2 [Source:HGNC Symbol;Acc:HGNC:30809]	1.917	0.01568	1.911	0.04378	1.738	0.1736
ENSG00000064687	ABCA7	ATP binding cassette subfamily A member 7 [Source:HGNC Symbol;Acc:HGNC:37]	-0.4067	0.3845	-0.4001	0.45	-0.7328	0.2529
ENSG00000064703	DDX20	DEAD-box helicase 20 [Source:HGNC Symbol;Acc:HGNC:2743]	-0.1908	0.5119	-0.1828	0.6171	-0.2165	0.4459
ENSG00000064726	BTBD1	BTB domain containing 1 [Source:HGNC Symbol;Acc:HGNC:1120]	-0.06496	0.6899	-0.05746	0.8294	-0.07459	0.64
ENSG00000064763	FAR2	fatty acyl-CoA reductase 2 [Source:HGNC Symbol;Acc:HGNC:25531]	0.2302	0.4159	0.2354	0.4471	0.2043	0.5036
ENSG00000064787	BCAS1	breast carcinoma amplified sequence 1 [Source:HGNC Symbol;Acc:HGNC:974]	-0.1874	0.7446	-0.1791	0.79	-0.2472	0.6608
ENSG00000064932	SBNO2	strawberry notch homolog 2 [Source:HGNC Symbol;Acc:HGNC:29158]	-0.03234	0.9146	-0.02484	0.9537	0.06612	0.7594
ENSG00000064961	HMG20B	high mobility group 20B [Source:HGNC Symbol;Acc:HGNC:5002]	0.09081	0.6737	0.09738	0.7381	0.1102	0.5812
ENSG00000064995	TAF11	TATA-box binding protein associated factor 11 [Source:HGNC Symbol;Acc:HGNC:11544]	-0.06253	0.8207	-0.0527	0.8918	-0.151	0.5344
ENSG00000064999	ANKS1A	ankyrin repeat and sterile alpha motif domain containing 1A [Source:HGNC Symbol;Acc:HGNC:20961]	-0.05213	0.6976	-0.04414	0.8454	-0.04486	0.714
ENSG00000065000	AP3D1	adaptor related protein complex 3 subunit delta 1 [Source:HGNC Symbol;Acc:HGNC:568]	-0.1199	0.3953	-0.1128	0.5632	-0.08728	0.5398
ENSG00000065029	ZNF76	zinc finger protein 76 [Source:HGNC Symbol;Acc:HGNC:13149]	-0.00422	0.9891	0.003234	0.9952	-0.05734	0.8124
ENSG00000065060	UHRF1BP1	UHRF1 binding protein 1 [Source:HGNC Symbol;Acc:HGNC:21216]	0.2944	0.3041	0.3008	0.3668	0.2989	0.3351
ENSG00000065135	GNAI3	G protein subunit alpha i3 [Source:HGNC Symbol;Acc:HGNC:4387]	-0.01371	0.9634	-0.007338	0.9871	0.005574	0.9845
ENSG00000065154	OAT	ornithine aminotransferase [Source:HGNC Symbol;Acc:HGNC:8091]	0.06891	0.8482	0.0768	0.8571	0.1213	0.7118
ENSG00000065183	WDR3	WD repeat domain 3 [Source:HGNC Symbol;Acc:HGNC:12755]	-0.08161	0.8267	-0.08619	0.8762	-0.1689	0.6316
ENSG00000065243	PKN2	protein kinase N2 [Source:HGNC Symbol;Acc:HGNC:9406]	0.117	0.5579	0.1235	0.6158	0.1044	0.6139
ENSG00000065357	DGKA	diacylglycerol kinase alpha [Source:HGNC Symbol;Acc:HGNC:2849]	-0.1434	0.2979	-0.1359	0.466	-0.1335	0.3418
ENSG00000065413	ANKRD44	ankyrin repeat domain 44 [Source:HGNC Symbol;Acc:HGNC:25259]	0.03505	0.8495	0.04191	0.8749	0.05394	0.7918
ENSG00000065427	KARS1	lysyl-tRNA synthetase 1 [Source:HGNC Symbol;Acc:HGNC:6215]	0.2136	0.4271	0.2192	0.4843	0.2219	0.4301
ENSG00000065457	ADAT1	adenosine deaminase tRNA specific 1 [Source:HGNC Symbol;Acc:HGNC:228]	-0.03046	0.9038	-0.02273	0.9538	-0.06401	0.7594
ENSG00000065491	TBC1D22B	TBC1 domain family member 22B [Source:HGNC Symbol;Acc:HGNC:21602]	0.009755	0.9731	0.01729	0.9685	-0.03668	0.862
ENSG00000065518	NDUFB4	NADH:ubiquinone oxidoreductase subunit B4 [Source:HGNC Symbol;Acc:HGNC:7699]	0.1133	0.3289	0.12	0.532	0.1192	0.3503
ENSG00000065526	SPEN	spen family transcriptional repressor [Source:HGNC Symbol;Acc:HGNC:17575]	-0.03216	0.8932	-0.02539	0.945	-0.01095	0.9664
ENSG00000065548	ZC3H15	zinc finger CCCH-type containing 15 [Source:HGNC Symbol;Acc:HGNC:29528]	0.1298	0.5061	0.1371	0.5768	0.1088	0.6069
ENSG00000065559	MAP2K4	mitogen-activated protein kinase kinase 4 [Source:HGNC Symbol;Acc:HGNC:6844]	-0.07863	0.6641	-0.0712	0.7757	-0.06534	0.7017
ENSG00000065613	SLK	STE20 like kinase [Source:HGNC Symbol;Acc:HGNC:11088]	0.0714	0.8239	0.07652	0.8453	0.092	0.7594
ENSG00000065615	CYB5R4	cytochrome b5 reductase 4 [Source:HGNC Symbol;Acc:HGNC:20147]	-0.02998	0.8733	-0.02298	0.9424	-0.02583	0.9017
ENSG00000065618	COL17A1	collagen type XVII alpha 1 chain [Source:HGNC Symbol;Acc:HGNC:2194]	0.3614	0.3685	0.3638	0.4678	0.2062	0.6583
ENSG00000065621	GSTO2	glutathione S-transferase omega 2 [Source:HGNC Symbol;Acc:HGNC:23064]	0.1376	0.5988	0.1435	0.6589	0.1428	0.5896
ENSG00000065665	SEC61A2	SEC61 translocon alpha 2 subunit [Source:HGNC Symbol;Acc:HGNC:17702]	-0.1192	0.6329	-0.1123	0.713	-0.1372	0.5748
ENSG00000065675	PRKCQ	protein kinase C theta [Source:HGNC Symbol;Acc:HGNC:9410]	-0.1337	0.7753	-0.1251	0.8134	-0.1803	0.7052
ENSG00000065802	ASB1	ankyrin repeat and SOCS box containing 1 [Source:HGNC Symbol;Acc:HGNC:16011]	0.08654	0.7347	0.09198	0.7918	0.07756	0.7658
ENSG00000065809	FAM107B	family with sequence similarity 107 member B [Source:HGNC Symbol;Acc:HGNC:23726]	-0.1468	0.5482	-0.141	0.6183	-0.1632	0.516
ENSG00000065882	TBC1D1	TBC1 domain family member 1 [Source:HGNC Symbol;Acc:HGNC:11578]	0.07805	0.6842	0.08473	0.7421	0.05868	0.7533
ENSG00000065883	CDK13	cyclin dependent kinase 13 [Source:HGNC Symbol;Acc:HGNC:1733]	0.09242	0.4278	0.09988	0.5648	0.08495	0.4944
ENSG00000065911	MTHFD2	methylenetetrahydrofolate dehydrogenase (NADP+ dependent) 2, methenyltetrahydrofolate cyclohydrolase [Source:HGNC Symbol;Acc:HGNC:7434]	0.6741	0.0774	0.6781	0.0918	0.5271	0.304
ENSG00000065923	SLC9A7	solute carrier family 9 member A7 [Source:HGNC Symbol;Acc:HGNC:17123]	-0.3561	0.2421	-0.3475	0.2891	-0.3676	0.2802
ENSG00000065970	FOXJ2	forkhead box J2 [Source:HGNC Symbol;Acc:HGNC:24818]	-0.177	0.4227	-0.1697	0.5106	-0.1569	0.49
ENSG00000065978	YBX1	Y-box binding protein 1 [Source:HGNC Symbol;Acc:HGNC:8014]	0.1123	0.5114	0.1199	0.5817	0.1123	0.5244
ENSG00000065989	PDE4A	phosphodiesterase 4A [Source:HGNC Symbol;Acc:HGNC:8780]	-0.3053	0.6907	-0.2992	0.7666	-0.5241	0.3478
ENSG00000066027	PPP2R5A	protein phosphatase 2 regulatory subunit B'alpha [Source:HGNC Symbol;Acc:HGNC:9309]	-0.08756	0.7776	-0.08075	0.8306	-0.1013	0.7466
ENSG00000066044	ELAVL1	ELAV like RNA binding protein 1 [Source:HGNC Symbol;Acc:HGNC:3312]	0.02153	0.9312	0.03099	0.9313	-0.001916	0.9948
ENSG00000066084	DIP2B	disco interacting protein 2 homolog B [Source:HGNC Symbol;Acc:HGNC:29284]	0.1351	0.4704	0.1415	0.5429	0.1297	0.3854
ENSG00000066117	SMARCD1	SWI/SNF related, matrix associated, actin dependent regulator of chromatin, subfamily d, member 1 [Source:HGNC Symbol;Acc:HGNC:11106]	0.02363	0.8595	0.02902	0.908	0.0385	0.7817
ENSG00000066136	NFYC	nuclear transcription factor Y subunit gamma [Source:HGNC Symbol;Acc:HGNC:7806]	-0.05627	0.6104	-0.04843	0.8134	-0.04562	0.7086
ENSG00000066294	CD84	CD84 molecule [Source:HGNC Symbol;Acc:HGNC:1704]	-0.2204	0.6639	-0.2119	0.726	-0.03201	0.9668
ENSG00000066322	ELOVL1	ELOVL fatty acid elongase 1 [Source:HGNC Symbol;Acc:HGNC:14418]	-0.1772	0.202	-0.1709	0.3668	-0.1498	0.3412
ENSG00000066336	SPI1	Spi-1 proto-oncogene [Source:HGNC Symbol;Acc:HGNC:11241]	-0.00719	0.9744	-0.0003032	0.9992	0.0496	0.738
ENSG00000066379	ZNRD1	zinc ribbon domain containing 1 [Source:HGNC Symbol;Acc:HGNC:13182]	-0.154	0.4153	-0.1486	0.5773	-0.1706	0.3661
ENSG00000066422	ZBTB11	zinc finger and BTB domain containing 11 [Source:HGNC Symbol;Acc:HGNC:16740]	0.1355	0.5277	0.1428	0.5705	0.1396	0.5168
ENSG00000066427	ATXN3	ataxin 3 [Source:HGNC Symbol;Acc:HGNC:7106]	0.1882	0.2521	0.1959	0.35	0.1501	0.4087
ENSG00000066455	GOLGA5	golgin A5 [Source:HGNC Symbol;Acc:HGNC:4428]	-0.03252	0.8982	-0.02498	0.9498	-0.07769	0.7086
ENSG00000066557	LRRC40	leucine rich repeat containing 40 [Source:HGNC Symbol;Acc:HGNC:26004]	0.139	0.7979	0.1456	0.8283	0.1698	0.7552
ENSG00000066583	ISOC1	isochorismatase domain containing 1 [Source:HGNC Symbol;Acc:HGNC:24254]	0.1141	0.9359	0.1209	0.941	0.686	0.6844
ENSG00000177294	FBXO39	F-box protein 39 [Source:HGNC Symbol;Acc:HGNC:28565]	1.882	0.01611	1.866	0.04527	1.222	0.3645
ENSG00000066739	ATG2B	autophagy related 2B [Source:HGNC Symbol;Acc:HGNC:20187]	-0.08986	0.6012	-0.0822	0.7231	-0.08977	0.5989
ENSG00000066777	ARFGEF1	ADP ribosylation factor guanine nucleotide exchange factor 1 [Source:HGNC Symbol;Acc:HGNC:15772]	-0.01096	0.9665	-0.00348	0.9915	-0.009584	0.9613
ENSG00000066827	ZFAT	zinc finger and AT-hook domain containing [Source:HGNC Symbol;Acc:HGNC:19899]	-0.1506	0.2449	-0.1441	0.4709	-0.1572	0.3104
ENSG00000066855	MTFR1	mitochondrial fission regulator 1 [Source:HGNC Symbol;Acc:HGNC:29510]	-0.04332	0.9155	-0.03655	0.9544	-0.1143	0.7289
ENSG00000066923	STAG3	stromal antigen 3 [Source:HGNC Symbol;Acc:HGNC:11356]	0.3224	0.3078	0.329	0.3601	0.3154	0.3135
ENSG00000066933	MYO9A	myosin IXA [Source:HGNC Symbol;Acc:HGNC:7608]	-0.00781	0.9891	-0.003361	0.9969	0.01808	0.9709
ENSG00000067048	DDX3Y	DEAD-box helicase 3 Y-linked [Source:HGNC Symbol;Acc:HGNC:2699]	-0.3233	0.8068	-0.3121	0.8294	-0.13	0.9175
ENSG00000067057	PFKP	phosphofructokinase, platelet [Source:HGNC Symbol;Acc:HGNC:8878]	-0.5758	0.2371	-0.5705	0.3125	-0.4247	0.4503
ENSG00000067064	IDI1	isopentenyl-diphosphate delta isomerase 1 [Source:HGNC Symbol;Acc:HGNC:5387]	-0.0559	0.8673	-0.04838	0.9119	-0.04895	0.8892
ENSG00000067066	SP100	SP100 nuclear antigen [Source:HGNC Symbol;Acc:HGNC:11206]	0.3528	0.1469	0.3586	0.1755	0.3302	0.1797
ENSG00000067082	KLF6	Kruppel like factor 6 [Source:HGNC Symbol;Acc:HGNC:2235]	0.06642	0.7612	0.07421	0.7833	0.09687	0.6334
ENSG00000067113	PLPP1	phospholipid phosphatase 1 [Source:HGNC Symbol;Acc:HGNC:9228]	0.1495	0.7432	0.1555	0.7893	0.1856	0.6283
ENSG00000067167	TRAM1	translocation associated membrane protein 1 [Source:HGNC Symbol;Acc:HGNC:20568]	0.06502	0.8181	0.07233	0.8366	0.0166	0.9574
ENSG00000067182	TNFRSF1A	TNF receptor superfamily member 1A [Source:HGNC Symbol;Acc:HGNC:11916]	-0.2609	0.114	-0.2536	0.1922	-0.2365	0.1178
ENSG00000067208	EVI5	ecotropic viral integration site 5 [Source:HGNC Symbol;Acc:HGNC:3501]	-0.1401	0.4222	-0.1329	0.5745	-0.1122	0.574
ENSG00000067221	STOML1	stomatin like 1 [Source:HGNC Symbol;Acc:HGNC:14560]	0.442	0.4965	0.4436	0.5711	0.3603	0.6878
ENSG00000067225	PKM	pyruvate kinase M1/2 [Source:HGNC Symbol;Acc:HGNC:9021]	-0.1458	0.6501	-0.1381	0.7127	-0.1491	0.6481
ENSG00000067248	DHX29	DExH-box helicase 29 [Source:HGNC Symbol;Acc:HGNC:15815]	-0.05496	0.7505	-0.04766	0.8749	-0.06331	0.7011
ENSG00000067334	DNTTIP2	deoxynucleotidyltransferase terminal interacting protein 2 [Source:HGNC Symbol;Acc:HGNC:24013]	-0.3221	0.05487	-0.3141	0.09001	-0.3108	0.1129
ENSG00000067365	METTL22	methyltransferase like 22 [Source:HGNC Symbol;Acc:HGNC:28368]	-0.1376	0.4827	-0.1304	0.6194	-0.1542	0.4343
ENSG00000067369	TP53BP1	tumor protein p53 binding protein 1 [Source:HGNC Symbol;Acc:HGNC:11999]	-0.02446	0.9219	-0.01727	0.9669	0.005573	0.9829
ENSG00000146205	ANO7	anoctamin 7 [Source:HGNC Symbol;Acc:HGNC:31677]	1.839	0.002179	1.839	0.005242	2.532	0.02232
ENSG00000067596		DEAH-box helicase 8 [Source:NCBI gene;Acc:1659]	-0.03806	0.7752	-0.03107	0.895	-0.004276	0.9813
ENSG00000067606	PRKCZ	protein kinase C zeta [Source:HGNC Symbol;Acc:HGNC:9412]	-0.1225	0.5757	-0.1154	0.6883	-0.1031	0.6623
ENSG00000067646	ZFY	zinc finger protein Y-linked [Source:HGNC Symbol;Acc:HGNC:12870]	-0.1377	0.9069	-0.1289	0.9167	-0.08217	0.9338
ENSG00000067704	IARS2	isoleucyl-tRNA synthetase 2, mitochondrial [Source:HGNC Symbol;Acc:HGNC:29685]	0.03082	0.9383	0.03711	0.9438	0.02019	0.9565
ENSG00000067798	NAV3	neuron navigator 3 [Source:HGNC Symbol;Acc:HGNC:15998]	-0.4471	0.3917	-0.4389	0.4555	-0.383	0.4994
ENSG00000067829	IDH3G	isocitrate dehydrogenase (NAD(+)) 3 non-catalytic subunit gamma [Source:HGNC Symbol;Acc:HGNC:5386]	0.03224	0.8997	0.03971	0.9054	0.04347	0.855
ENSG00000067836	ROGDI	rogdi atypical leucine zipper [Source:HGNC Symbol;Acc:HGNC:29478]	0.1506	0.5427	0.1573	0.6203	0.1307	0.609
ENSG00000067900	ROCK1	Rho associated coiled-coil containing protein kinase 1 [Source:HGNC Symbol;Acc:HGNC:10251]	0.08693	0.6202	0.09373	0.6857	0.08711	0.5722
ENSG00000067955	CBFB	core-binding factor subunit beta [Source:HGNC Symbol;Acc:HGNC:1539]	-0.1209	0.6201	-0.113	0.7199	-0.2017	0.3355
ENSG00000067992	PDK3	pyruvate dehydrogenase kinase 3 [Source:HGNC Symbol;Acc:HGNC:8811]	0.1132	0.3944	0.1203	0.4935	0.1342	0.2848
ENSG00000068001	HYAL2	hyaluronidase 2 [Source:HGNC Symbol;Acc:HGNC:5321]	-0.1451	0.627	-0.1373	0.7198	-0.1828	0.5123
ENSG00000068024	HDAC4	histone deacetylase 4 [Source:HGNC Symbol;Acc:HGNC:14063]	-0.01993	0.965	-0.01463	0.9793	0.006223	0.9884
ENSG00000068028	RASSF1	Ras association domain family member 1 [Source:HGNC Symbol;Acc:HGNC:9882]	-0.07861	0.6894	-0.07085	0.7918	-0.05288	0.8132
ENSG00000068079	IFI35	interferon induced protein 35 [Source:HGNC Symbol;Acc:HGNC:5399]	0.6039	0.2315	0.6073	0.2456	0.5536	0.3058
ENSG00000068097	HEATR6	HEAT repeat containing 6 [Source:HGNC Symbol;Acc:HGNC:24076]	-0.1427	0.7513	-0.1369	0.8235	-0.05608	0.9133
ENSG00000068120	COASY	Coenzyme A synthase [Source:HGNC Symbol;Acc:HGNC:29932]	-0.02559	0.9105	-0.01884	0.9602	-0.00631	0.9794
ENSG00000068305	MEF2A	myocyte enhancer factor 2A [Source:HGNC Symbol;Acc:HGNC:6993]	0.3137	0.2902	0.3204	0.2983	0.2728	0.3856
ENSG00000068308	OTUD5	OTU deubiquitinase 5 [Source:HGNC Symbol;Acc:HGNC:25402]	0.03883	0.8294	0.04583	0.8638	0.05763	0.6369
ENSG00000068323	TFE3	transcription factor binding to IGHM enhancer 3 [Source:HGNC Symbol;Acc:HGNC:11752]	-0.1184	0.3717	-0.1111	0.5724	-0.08805	0.4572
ENSG00000068354	TBC1D25	TBC1 domain family member 25 [Source:HGNC Symbol;Acc:HGNC:8092]	-0.1041	0.4869	-0.09688	0.6739	-0.08803	0.6067
ENSG00000068366	ACSL4	acyl-CoA synthetase long chain family member 4 [Source:HGNC Symbol;Acc:HGNC:3571]	-0.04462	0.9111	-0.0375	0.9431	-0.05256	0.8792
ENSG00000068383	INPP5A	inositol polyphosphate-5-phosphatase A [Source:HGNC Symbol;Acc:HGNC:6076]	-0.07732	0.7612	-0.07063	0.8241	-0.08147	0.7343
ENSG00000068394	GPKOW	G-patch domain and KOW motifs [Source:HGNC Symbol;Acc:HGNC:30677]	0.1588	0.3022	0.1627	0.4761	0.1283	0.4565
ENSG00000068400	GRIPAP1	GRIP1 associated protein 1 [Source:HGNC Symbol;Acc:HGNC:18706]	0.00214	0.9929	0.009273	0.9806	0.01136	0.9565
ENSG00000068438	FTSJ1	FtsJ RNA 2'-O-methyltransferase 1 [Source:HGNC Symbol;Acc:HGNC:13254]	-0.04256	0.9155	-0.03696	0.9498	-0.03701	0.9175
ENSG00000068489	PRR11	proline rich 11 [Source:HGNC Symbol;Acc:HGNC:25619]	0.2791	0.4155	0.285	0.4974	0.1456	0.7508
ENSG00000068650	ATP11A	ATPase phospholipid transporting 11A [Source:HGNC Symbol;Acc:HGNC:13552]	0.05433	0.6894	0.06094	0.7816	0.07243	0.5244
ENSG00000068697	LAPTM4A	lysosomal protein transmembrane 4 alpha [Source:HGNC Symbol;Acc:HGNC:6924]	0.009099	0.977	0.01684	0.9716	0.01846	0.9495
ENSG00000068724	TTC7A	tetratricopeptide repeat domain 7A [Source:HGNC Symbol;Acc:HGNC:19750]	0.07555	0.7748	0.08493	0.809	-0.01505	0.9622
ENSG00000068745	IP6K2	inositol hexakisphosphate kinase 2 [Source:HGNC Symbol;Acc:HGNC:17313]	0.09239	0.491	0.09927	0.5981	0.1237	0.3693
ENSG00000068784	SRBD1	S1 RNA binding domain 1 [Source:HGNC Symbol;Acc:HGNC:25521]	0.2889	0.2956	0.2935	0.3436	0.2516	0.3814
ENSG00000068796	KIF2A	kinesin family member 2A [Source:HGNC Symbol;Acc:HGNC:6318]	0.2928	0.1127	0.3014	0.1844	0.2188	0.295
ENSG00000068831	RASGRP2	RAS guanyl releasing protein 2 [Source:HGNC Symbol;Acc:HGNC:9879]	-0.0009525	0.9957	0.006238	0.9898	0.008851	0.9729
ENSG00000068878	PSME4	proteasome activator subunit 4 [Source:HGNC Symbol;Acc:HGNC:20635]	0.01869	0.9461	0.02592	0.9392	0.03445	0.8734
ENSG00000068903	SIRT2	sirtuin 2 [Source:HGNC Symbol;Acc:HGNC:10886]	-0.04284	0.8266	-0.03533	0.9034	-0.02294	0.917
ENSG00000068971	PPP2R5B	protein phosphatase 2 regulatory subunit B'beta [Source:HGNC Symbol;Acc:HGNC:9310]	-0.252	0.4313	-0.245	0.5012	-0.2334	0.4815
ENSG00000068976	PYGM	glycogen phosphorylase, muscle associated [Source:HGNC Symbol;Acc:HGNC:9726]	0.2564	0.1206	0.2625	0.1844	0.2645	0.1645
ENSG00000069020	MAST4	microtubule associated serine/threonine kinase family member 4 [Source:HGNC Symbol;Acc:HGNC:19037]	1.003	0.1168	1.011	0.1022	0.819	0.386
ENSG00000069248	NUP133	nucleoporin 133 [Source:HGNC Symbol;Acc:HGNC:18016]	-0.1749	0.2213	-0.1671	0.4301	-0.1981	0.2011
ENSG00000069275	NUCKS1	nuclear casein kinase and cyclin dependent kinase substrate 1 [Source:HGNC Symbol;Acc:HGNC:29923]	0.3284	0.1587	0.3361	0.2226	0.23	0.3942
ENSG00000069329	VPS35	VPS35 retromer complex component [Source:HGNC Symbol;Acc:HGNC:13487]	-0.09879	0.6833	-0.09129	0.7726	-0.1006	0.6714
ENSG00000069345	DNAJA2	DnaJ heat shock protein family (Hsp40) member A2 [Source:HGNC Symbol;Acc:HGNC:14884]	-0.2589	0.2254	-0.2509	0.2727	-0.2159	0.3118
ENSG00000069399	BCL3	BCL3 transcription coactivator [Source:HGNC Symbol;Acc:HGNC:998]	0.07277	0.7519	0.07977	0.7863	0.1348	0.45
ENSG00000069424	KCNAB2	potassium voltage-gated channel subfamily A regulatory beta subunit 2 [Source:HGNC Symbol;Acc:HGNC:6229]	-0.1918	0.4168	-0.1835	0.4893	-0.135	0.5803
ENSG00000069493	CLEC2D	C-type lectin domain family 2 member D [Source:HGNC Symbol;Acc:HGNC:14351]	0.0004166	0.9987	0.005744	0.992	-0.003863	0.9932
ENSG00000069509	FUNDC1	FUN14 domain containing 1 [Source:HGNC Symbol;Acc:HGNC:28746]	0.1313	0.7748	0.1355	0.813	0.05502	0.9242
ENSG00000069667	RORA	RAR related orphan receptor A [Source:HGNC Symbol;Acc:HGNC:10258]	0.03482	0.9741	0.03886	0.9764	0.07498	0.931
ENSG00000069702	TGFBR3	transforming growth factor beta receptor 3 [Source:HGNC Symbol;Acc:HGNC:11774]	0.4641	0.4146	0.4682	0.497	0.5514	0.3505
ENSG00000069849	ATP1B3	ATPase Na+/K+ transporting subunit beta 3 [Source:HGNC Symbol;Acc:HGNC:806]	-0.08899	0.8823	-0.0827	0.9119	-0.08738	0.8944
ENSG00000069869	NEDD4	NEDD4 E3 ubiquitin protein ligase [Source:HGNC Symbol;Acc:HGNC:7727]	0.102	0.7668	0.1092	0.7994	0.04151	0.9131
ENSG00000069943	PIGB	phosphatidylinositol glycan anchor biosynthesis class B [Source:HGNC Symbol;Acc:HGNC:8959]	0.1544	0.4168	0.1613	0.4554	0.1344	0.4912
ENSG00000069956	MAPK6	mitogen-activated protein kinase 6 [Source:HGNC Symbol;Acc:HGNC:6879]	0.1988	0.4652	0.2062	0.5112	0.2215	0.3786
ENSG00000069974	RAB27A	RAB27A, member RAS oncogene family [Source:HGNC Symbol;Acc:HGNC:9766]	-0.0262	0.9219	-0.02013	0.9602	-0.02683	0.9175
ENSG00000069998	HDHD5	haloacid dehalogenase like hydrolase domain containing 5 [Source:HGNC Symbol;Acc:HGNC:1843]	-0.5509	0.2213	-0.5423	0.2616	-0.5478	0.2934
ENSG00000070010	UFD1	ubiquitin recognition factor in ER associated degradation 1 [Source:HGNC Symbol;Acc:HGNC:12520]	-0.05487	0.7864	-0.04714	0.8696	-5.27e-05	0.9999
ENSG00000070018	LRP6	LDL receptor related protein 6 [Source:HGNC Symbol;Acc:HGNC:6698]	-0.005805	0.9911	0.0008908	0.9989	-0.009181	0.9862
ENSG00000070019	GUCY2C	guanylate cyclase 2C [Source:HGNC Symbol;Acc:HGNC:4688]	0.1983	0.2927	0.2052	0.3801	0.166	0.4493
ENSG00000070047	PHRF1	PHD and ring finger domains 1 [Source:HGNC Symbol;Acc:HGNC:24351]	0.03833	0.8963	0.0455	0.8995	0.05936	0.8133
ENSG00000070061	ELP1	elongator complex protein 1 [Source:HGNC Symbol;Acc:HGNC:5959]	0.038	0.8896	0.04624	0.8995	0.02922	0.9129
ENSG00000070081	NUCB2	nucleobindin 2 [Source:HGNC Symbol;Acc:HGNC:8044]	0.145	0.4162	0.1509	0.5508	0.1258	0.4833
ENSG00000070087	PFN2	profilin 2 [Source:HGNC Symbol;Acc:HGNC:8882]	-0.09701	0.7407	-0.08988	0.8148	-0.1378	0.5908
ENSG00000070182	SPTB	spectrin beta, erythrocytic [Source:HGNC Symbol;Acc:HGNC:11274]	0.3756	0.2087	0.3818	0.2565	0.4122	0.2188
ENSG00000070190	DAPP1	dual adaptor of phosphotyrosine and 3-phosphoinositides 1 [Source:HGNC Symbol;Acc:HGNC:16500]	0.3805	0.1469	0.3859	0.1735	0.3626	0.1916
ENSG00000070214	SLC44A1	solute carrier family 44 member 1 [Source:HGNC Symbol;Acc:HGNC:18798]	-0.1421	0.6898	-0.1361	0.7549	-0.1378	0.7072
ENSG00000070269	TMEM260	transmembrane protein 260 [Source:HGNC Symbol;Acc:HGNC:20185]	0.1713	0.5831	0.1781	0.6158	0.1036	0.7693
ENSG00000070366	SMG6	SMG6 nonsense mediated mRNA decay factor [Source:HGNC Symbol;Acc:HGNC:17809]	-0.1124	0.5074	-0.106	0.6739	-0.1211	0.5023
ENSG00000070367	EXOC5	exocyst complex component 5 [Source:HGNC Symbol;Acc:HGNC:10696]	0.05057	0.8627	0.0586	0.8782	0.01016	0.9772
ENSG00000070371	CLTCL1	clathrin heavy chain like 1 [Source:HGNC Symbol;Acc:HGNC:2093]	-0.107	0.7511	-0.09977	0.8134	-0.08001	0.8187
ENSG00000070413	DGCR2	DiGeorge syndrome critical region gene 2 [Source:HGNC Symbol;Acc:HGNC:2845]	0.03298	0.8845	0.04021	0.8939	0.06181	0.7285
ENSG00000070423	RNF126	ring finger protein 126 [Source:HGNC Symbol;Acc:HGNC:21151]	0.1931	0.4644	0.201	0.5218	0.1219	0.6905
ENSG00000070444	MNT	MAX network transcriptional repressor [Source:HGNC Symbol;Acc:HGNC:7188]	-0.06193	0.8003	-0.05413	0.865	-0.01871	0.9446
ENSG00000070476	ZXDC	ZXD family zinc finger C [Source:HGNC Symbol;Acc:HGNC:28160]	-0.1006	0.3399	-0.09342	0.5924	-0.06414	0.6197
ENSG00000070495	JMJD6	jumonji domain containing 6, arginine demethylase and lysine hydroxylase [Source:HGNC Symbol;Acc:HGNC:19355]	0.04597	0.8761	0.05318	0.8841	0.09967	0.6835
ENSG00000070501	POLB	DNA polymerase beta [Source:HGNC Symbol;Acc:HGNC:9174]	0.1168	0.6226	0.1231	0.6515	0.125	0.5719
ENSG00000070540	WIPI1	WD repeat domain, phosphoinositide interacting 1 [Source:HGNC Symbol;Acc:HGNC:25471]	-0.003886	0.9881	0.004124	0.991	0.0006506	0.9988
ENSG00000070610	GBA2	glucosylceramidase beta 2 [Source:HGNC Symbol;Acc:HGNC:18986]	-0.2032	0.07307	-0.1962	0.1893	-0.1713	0.1922
ENSG00000070614	NDST1	N-deacetylase and N-sulfotransferase 1 [Source:HGNC Symbol;Acc:HGNC:7680]	-0.3385	0.2958	-0.3305	0.3436	-0.338	0.3576
ENSG00000070669	ASNS	asparagine synthetase (glutamine-hydrolyzing) [Source:HGNC Symbol;Acc:HGNC:753]	-0.08594	0.8294	-0.08036	0.878	-0.09225	0.792
ENSG00000070718	AP3M2	adaptor related protein complex 3 subunit mu 2 [Source:HGNC Symbol;Acc:HGNC:570]	0.208	0.4617	0.215	0.525	0.2362	0.3942
ENSG00000070729	CNGB1	cyclic nucleotide gated channel subunit beta 1 [Source:HGNC Symbol;Acc:HGNC:2151]	-0.1355	0.763	-0.1268	0.8128	-0.2321	0.5344
ENSG00000070731	ST6GALNAC2	ST6 N-acetylgalactosaminide alpha-2,6-sialyltransferase 2 [Source:HGNC Symbol;Acc:HGNC:10867]	0.3413	0.05457	0.349	0.07155	0.3328	0.1075
ENSG00000070756	PABPC1	poly(A) binding protein cytoplasmic 1 [Source:HGNC Symbol;Acc:HGNC:8554]	-0.1491	0.2271	-0.1411	0.4238	-0.1274	0.3758
ENSG00000070761	CFAP20	cilia and flagella associated protein 20 [Source:HGNC Symbol;Acc:HGNC:29523]	0.01082	0.9839	0.01789	0.9792	-0.06312	0.8862
ENSG00000070770	CSNK2A2	casein kinase 2 alpha 2 [Source:HGNC Symbol;Acc:HGNC:2459]	0.001467	0.9957	0.008098	0.991	-0.07187	0.8389
ENSG00000070814	TCOF1	treacle ribosome biogenesis factor 1 [Source:HGNC Symbol;Acc:HGNC:11654]	0.05543	0.8467	0.06202	0.8668	0.06555	0.8164
ENSG00000070831	CDC42	cell division cycle 42 [Source:HGNC Symbol;Acc:HGNC:1736]	0.02567	0.9219	0.03157	0.9271	0.009566	0.9714
ENSG00000070950	RAD18	RAD18 E3 ubiquitin protein ligase [Source:HGNC Symbol;Acc:HGNC:18278]	-0.3154	0.2621	-0.3084	0.3518	-0.2991	0.3092
ENSG00000070961	ATP2B1	ATPase plasma membrane Ca2+ transporting 1 [Source:HGNC Symbol;Acc:HGNC:814]	0.0243	0.955	0.03015	0.9537	0.07847	0.8323
ENSG00000071051	NCK2	NCK adaptor protein 2 [Source:HGNC Symbol;Acc:HGNC:7665]	0.1358	0.3749	0.1418	0.4733	0.1309	0.4124
ENSG00000071054	MAP4K4	mitogen-activated protein kinase kinase kinase kinase 4 [Source:HGNC Symbol;Acc:HGNC:6866]	-0.04566	0.8003	-0.03821	0.8888	-0.02962	0.8694
ENSG00000071073	MGAT4A	alpha-1,3-mannosyl-glycoprotein 4-beta-N-acetylglucosaminyltransferase A [Source:HGNC Symbol;Acc:HGNC:7047]	0.2074	0.3175	0.2133	0.3791	0.2031	0.3482
ENSG00000071082	RPL31	ribosomal protein L31 [Source:HGNC Symbol;Acc:HGNC:10334]	-0.07479	0.6869	-0.06885	0.8071	-0.0552	0.7814
ENSG00000071127	WDR1	WD repeat domain 1 [Source:HGNC Symbol;Acc:HGNC:12754]	-0.2602	0.09644	-0.2533	0.1726	-0.2231	0.1557
ENSG00000071189	SNX13	sorting nexin 13 [Source:HGNC Symbol;Acc:HGNC:21335]	0.008534	0.9746	0.01604	0.9684	-0.00524	0.983
ENSG00000071242	RPS6KA2	ribosomal protein S6 kinase A2 [Source:HGNC Symbol;Acc:HGNC:10431]	0.5075	0.1436	0.5128	0.162	0.3757	0.3634
ENSG00000071243	ING3	inhibitor of growth family member 3 [Source:HGNC Symbol;Acc:HGNC:14587]	-0.07251	0.7379	-0.0653	0.8209	-0.04641	0.8465
ENSG00000071246	VASH1	vasohibin 1 [Source:HGNC Symbol;Acc:HGNC:19964]	-0.06744	0.9582	-0.05756	0.9739	0.00361	0.9986
ENSG00000071462	BUD23	BUD23 rRNA methyltransferase and ribosome maturation factor [Source:HGNC Symbol;Acc:HGNC:16405]	0.2262	0.5639	0.2344	0.6067	0.2706	0.4693
ENSG00000071537	SEL1L	SEL1L adaptor subunit of ERAD E3 ubiquitin ligase [Source:HGNC Symbol;Acc:HGNC:10717]	-0.1062	0.5182	-0.09872	0.6561	-0.09796	0.5453
ENSG00000137959	IFI44L	interferon induced protein 44 like [Source:HGNC Symbol;Acc:HGNC:17817]	1.804	0.04077	1.806	0.09184	1.56	0.2118
ENSG00000071564	TCF3	transcription factor 3 [Source:HGNC Symbol;Acc:HGNC:11633]	0.1696	0.7276	0.1771	0.7686	0.1148	0.8152
ENSG00000187608	ISG15	ISG15 ubiquitin like modifier [Source:HGNC Symbol;Acc:HGNC:4053]	1.802	0.005647	1.805	0.007673	1.545	0.07526
ENSG00000071626	DAZAP1	DAZ associated protein 1 [Source:HGNC Symbol;Acc:HGNC:2683]	-0.05739	0.8433	-0.04937	0.8987	-0.09232	0.7064
ENSG00000071859	FAM50A	family with sequence similarity 50 member A [Source:HGNC Symbol;Acc:HGNC:18786]	-0.3018	0.1012	-0.295	0.1928	-0.2512	0.2394
ENSG00000071889	FAM3A	family with sequence similarity 3 member A [Source:HGNC Symbol;Acc:HGNC:13749]	0.2967	0.2149	0.3037	0.285	0.271	0.276
ENSG00000071894	CPSF1	cleavage and polyadenylation specific factor 1 [Source:HGNC Symbol;Acc:HGNC:2324]	0.2207	0.4808	0.2279	0.5448	0.2087	0.5598
ENSG00000071967	CYBRD1	cytochrome b reductase 1 [Source:HGNC Symbol;Acc:HGNC:20797]	0.1185	0.8358	0.1234	0.8607	0.1736	0.7558
ENSG00000071994	PDCD2	programmed cell death 2 [Source:HGNC Symbol;Acc:HGNC:8762]	0.0248	0.926	0.03135	0.9376	-0.009729	0.9721
ENSG00000072062	PRKACA	protein kinase cAMP-activated catalytic subunit alpha [Source:HGNC Symbol;Acc:HGNC:9380]	-0.1998	0.1475	-0.1927	0.2754	-0.1778	0.2582
ENSG00000072071	ADGRL1	adhesion G protein-coupled receptor L1 [Source:HGNC Symbol;Acc:HGNC:20973]	0.06084	0.8345	0.06659	0.8686	0.07431	0.7928
ENSG00000072110	ACTN1	actinin alpha 1 [Source:HGNC Symbol;Acc:HGNC:163]	-0.05526	0.7219	-0.04824	0.8371	-0.02075	0.88
ENSG00000072121	ZFYVE26	zinc finger FYVE-type containing 26 [Source:HGNC Symbol;Acc:HGNC:20761]	0.2464	0.4232	0.2517	0.4789	0.2074	0.5434
ENSG00000072134	EPN2	epsin 2 [Source:HGNC Symbol;Acc:HGNC:18639]	-0.1255	0.8467	-0.1183	0.8895	-0.09651	0.891
ENSG00000072135	PTPN18	protein tyrosine phosphatase non-receptor type 18 [Source:HGNC Symbol;Acc:HGNC:9649]	-0.021	0.9515	-0.01475	0.9759	0.0002077	0.9998
ENSG00000072163	LIMS2	LIM zinc finger domain containing 2 [Source:HGNC Symbol;Acc:HGNC:16084]	-0.565	0.1385	-0.5572	0.1975	-0.6974	0.1032
ENSG00000072274	TFRC	transferrin receptor [Source:HGNC Symbol;Acc:HGNC:11763]	0.1649	0.6635	0.1729	0.6794	0.1913	0.6049
ENSG00000072310	SREBF1	sterol regulatory element binding transcription factor 1 [Source:HGNC Symbol;Acc:HGNC:11289]	-0.209	0.3867	-0.2009	0.4554	-0.1403	0.5769
ENSG00000072364	AFF4	AF4/FMR2 family member 4 [Source:HGNC Symbol;Acc:HGNC:17869]	-0.01008	0.9744	-0.002917	0.995	-0.003011	0.9925
ENSG00000072401	UBE2D1	ubiquitin conjugating enzyme E2 D1 [Source:HGNC Symbol;Acc:HGNC:12474]	-0.1614	0.5757	-0.1549	0.6382	-0.1741	0.5342
ENSG00000072415	MPP5	membrane palmitoylated protein 5 [Source:HGNC Symbol;Acc:HGNC:18669]	0.06249	0.871	0.0698	0.8818	0.01565	0.9746
ENSG00000072501	SMC1A	structural maintenance of chromosomes 1A [Source:HGNC Symbol;Acc:HGNC:11111]	-0.05289	0.7791	-0.04544	0.8756	-0.07449	0.664
ENSG00000072506	HSD17B10	hydroxysteroid 17-beta dehydrogenase 10 [Source:HGNC Symbol;Acc:HGNC:4800]	0.01911	0.9731	0.02656	0.9714	-0.04902	0.9018
ENSG00000072518	MARK2	microtubule affinity regulating kinase 2 [Source:HGNC Symbol;Acc:HGNC:3332]	-0.08023	0.6173	-0.07359	0.7555	-0.06125	0.7153
ENSG00000072609	CHFR	checkpoint with forkhead and ring finger domains [Source:HGNC Symbol;Acc:HGNC:20455]	-0.06359	0.5846	-0.05589	0.7815	-0.04162	0.7386
ENSG00000072657	TRHDE	thyrotropin releasing hormone degrading enzyme [Source:HGNC Symbol;Acc:HGNC:30748]	0.6457	0.4714	0.6478	0.6248	0.8154	0.4058
ENSG00000072682	P4HA2	prolyl 4-hydroxylase subunit alpha 2 [Source:HGNC Symbol;Acc:HGNC:8547]	0.03539	0.9115	0.04307	0.9119	0.03538	0.9096
ENSG00000072694	FCGR2B	Fc fragment of IgG receptor IIb [Source:HGNC Symbol;Acc:HGNC:3618]	-0.166	0.7217	-0.1618	0.7745	-0.2299	0.5804
ENSG00000072736	NFATC3	nuclear factor of activated T cells 3 [Source:HGNC Symbol;Acc:HGNC:7777]	0.05783	0.8207	0.06489	0.8352	0.06735	0.7959
ENSG00000072756	TRNT1	tRNA nucleotidyl transferase 1 [Source:HGNC Symbol;Acc:HGNC:17341]	0.2257	0.2404	0.233	0.3436	0.1821	0.3962
ENSG00000072778	ACADVL	acyl-CoA dehydrogenase very long chain [Source:HGNC Symbol;Acc:HGNC:92]	-0.02917	0.9265	-0.0213	0.9642	0.01365	0.97
ENSG00000132669	RIN2	Ras and Rab interactor 2 [Source:HGNC Symbol;Acc:HGNC:18750]	1.747	0.0277	1.737	0.05371	1.241	0.3228
ENSG00000072803	FBXW11	F-box and WD repeat domain containing 11 [Source:HGNC Symbol;Acc:HGNC:13607]	0.04911	0.7343	0.05685	0.8088	0.02802	0.861
ENSG00000072818	ACAP1	ArfGAP with coiled-coil, ankyrin repeat and PH domains 1 [Source:HGNC Symbol;Acc:HGNC:16467]	0.03149	0.8992	0.0385	0.9065	0.05822	0.7823
ENSG00000072849	DERL2	derlin 2 [Source:HGNC Symbol;Acc:HGNC:17943]	0.03392	0.7779	0.04221	0.849	0.0375	0.7693
ENSG00000072858	SIDT1	SID1 transmembrane family member 1 [Source:HGNC Symbol;Acc:HGNC:25967]	0.3428	0.2822	0.3479	0.372	0.3967	0.1979
ENSG00000072864	NDE1	nudE neurodevelopment protein 1 [Source:HGNC Symbol;Acc:HGNC:17619]	-0.189	0.3159	-0.1814	0.4142	-0.1548	0.4093
ENSG00000072952	MRVI1	murine retrovirus integration site 1 homolog [Source:HGNC Symbol;Acc:HGNC:7237]	-0.1026	0.8954	-0.09506	0.9244	0.1046	0.9112
ENSG00000072954	TMEM38A	transmembrane protein 38A [Source:HGNC Symbol;Acc:HGNC:28462]	0.1854	0.6866	0.191	0.7388	0.2107	0.6363
ENSG00000072958	AP1M1	adaptor related protein complex 1 subunit mu 1 [Source:HGNC Symbol;Acc:HGNC:13667]	-0.003228	0.9891	0.003798	0.9914	0.01498	0.9454
ENSG00000073008	PVR	PVR cell adhesion molecule [Source:HGNC Symbol;Acc:HGNC:9705]	-0.1317	0.8434	-0.1229	0.884	-0.07411	0.9239
ENSG00000073050	XRCC1	X-ray repair cross complementing 1 [Source:HGNC Symbol;Acc:HGNC:12828]	0.03804	0.8387	0.04453	0.8768	0.02324	0.9125
ENSG00000073060	SCARB1	scavenger receptor class B member 1 [Source:HGNC Symbol;Acc:HGNC:1664]	-0.3367	0.3761	-0.3288	0.4722	-0.2808	0.498
ENSG00000073150	PANX2	pannexin 2 [Source:HGNC Symbol;Acc:HGNC:8600]	-0.1947	0.3782	-0.1872	0.4717	-0.1321	0.6057
ENSG00000073169	SELENOO	selenoprotein O [Source:HGNC Symbol;Acc:HGNC:30395]	-0.1788	0.2607	-0.1709	0.3873	-0.1441	0.4158
ENSG00000073331	ALPK1	alpha kinase 1 [Source:HGNC Symbol;Acc:HGNC:20917]	0.1468	0.5035	0.1533	0.5515	0.1323	0.5812
ENSG00000073350	LLGL2	LLGL scribble cell polarity complex component 2 [Source:HGNC Symbol;Acc:HGNC:6629]	-0.05131	0.9445	-0.04205	0.9698	-0.001347	0.9992
ENSG00000073417	PDE8A	phosphodiesterase 8A [Source:HGNC Symbol;Acc:HGNC:8793]	0.1622	0.7067	0.1675	0.7478	0.03947	0.9406
ENSG00000073464	CLCN4	chloride voltage-gated channel 4 [Source:HGNC Symbol;Acc:HGNC:2022]	-0.009177	0.9939	-0.004882	0.9981	-0.7876	0.3567
ENSG00000073605	GSDMB	gasdermin B [Source:HGNC Symbol;Acc:HGNC:23690]	0.2479	0.3403	0.2525	0.4334	0.2758	0.3112
ENSG00000073614	KDM5A	lysine demethylase 5A [Source:HGNC Symbol;Acc:HGNC:9886]	-0.03084	0.7884	-0.02341	0.9235	-0.01022	0.931
ENSG00000073711	PPP2R3A	protein phosphatase 2 regulatory subunit B''alpha [Source:HGNC Symbol;Acc:HGNC:9307]	0.1504	0.4572	0.1573	0.5637	0.1324	0.5395
ENSG00000073737	DHRS9	dehydrogenase/reductase 9 [Source:HGNC Symbol;Acc:HGNC:16888]	0.8077	0.07475	0.809	0.08371	0.7788	0.1669
ENSG00000073756	PTGS2	prostaglandin-endoperoxide synthase 2 [Source:HGNC Symbol;Acc:HGNC:9605]	-0.2058	0.6495	-0.2003	0.7061	-0.1523	0.7571
ENSG00000073803	MAP3K13	mitogen-activated protein kinase kinase kinase 13 [Source:HGNC Symbol;Acc:HGNC:6852]	0.3591	0.3826	0.3637	0.4416	0.364	0.4417
ENSG00000073849	ST6GAL1	ST6 beta-galactoside alpha-2,6-sialyltransferase 1 [Source:HGNC Symbol;Acc:HGNC:10860]	0.07186	0.8801	0.07677	0.8989	0.1141	0.7808
ENSG00000073910	FRY	FRY microtubule binding protein [Source:HGNC Symbol;Acc:HGNC:20367]	0.1672	0.2092	0.1731	0.326	0.1617	0.2308
ENSG00000073921	PICALM	phosphatidylinositol binding clathrin assembly protein [Source:HGNC Symbol;Acc:HGNC:15514]	0.05397	0.7319	0.0609	0.781	0.09367	0.5356
ENSG00000073969	NSF	N-ethylmaleimide sensitive factor, vesicle fusing ATPase [Source:HGNC Symbol;Acc:HGNC:8016]	0.2463	0.08754	0.2531	0.1916	0.2246	0.1672
ENSG00000074054	CLASP1	cytoplasmic linker associated protein 1 [Source:HGNC Symbol;Acc:HGNC:17088]	0.1257	0.2136	0.1329	0.3666	0.1335	0.1847
ENSG00000074071	MRPS34	mitochondrial ribosomal protein S34 [Source:HGNC Symbol;Acc:HGNC:16618]	-0.03862	0.9226	-0.03434	0.9537	-0.0319	0.9293
ENSG00000074266	EED	embryonic ectoderm development [Source:HGNC Symbol;Acc:HGNC:3188]	0.1607	0.4322	0.1687	0.5309	0.1309	0.5592
ENSG00000074276	CDHR2	cadherin related family member 2 [Source:HGNC Symbol;Acc:HGNC:18231]	-0.04034	0.9663	-0.0328	0.9772	-0.2323	0.7288
ENSG00000074319	TSG101	tumor susceptibility 101 [Source:HGNC Symbol;Acc:HGNC:15971]	-0.1567	0.3269	-0.1493	0.444	-0.1516	0.3179
ENSG00000074356	NCBP3	nuclear cap binding subunit 3 [Source:HGNC Symbol;Acc:HGNC:24612]	-0.01979	0.8992	-0.01181	0.9715	-0.02131	0.8932
ENSG00000074370	ATP2A3	ATPase sarcoplasmic/endoplasmic reticulum Ca2+ transporting 3 [Source:HGNC Symbol;Acc:HGNC:813]	-0.2017	0.3054	-0.1941	0.4075	-0.205	0.2971
ENSG00000074416	MGLL	monoglyceride lipase [Source:HGNC Symbol;Acc:HGNC:17038]	0.5588	0.1518	0.563	0.2009	0.3024	0.5441
ENSG00000074603	DPP8	dipeptidyl peptidase 8 [Source:HGNC Symbol;Acc:HGNC:16490]	0.005568	0.9856	0.01193	0.9779	-0.004034	0.9885
ENSG00000074621	SLC24A1	solute carrier family 24 member 1 [Source:HGNC Symbol;Acc:HGNC:10975]	0.5274	0.1013	0.5303	0.1379	0.36	0.3634
ENSG00000074660	SCARF1	scavenger receptor class F member 1 [Source:HGNC Symbol;Acc:HGNC:16820]	0.1022	0.8129	0.1088	0.8281	0.1291	0.7473
ENSG00000074755	ZZEF1	zinc finger ZZ-type and EF-hand domain containing 1 [Source:HGNC Symbol;Acc:HGNC:29027]	-0.05568	0.6097	-0.04868	0.8195	-0.03272	0.7808
ENSG00000074800	ENO1	enolase 1 [Source:HGNC Symbol;Acc:HGNC:3350]	-0.3744	0.1729	-0.366	0.2125	-0.3994	0.2287
ENSG00000135047	CTSL	cathepsin L [Source:HGNC Symbol;Acc:HGNC:2537]	1.733	0.01505	1.714	0.02577	1.436	0.1666
ENSG00000074842	MYDGF	myeloid derived growth factor [Source:HGNC Symbol;Acc:HGNC:16948]	-0.009478	0.9881	-0.0007465	0.9995	-0.1745	0.7438
ENSG00000074966	TXK	TXK tyrosine kinase [Source:HGNC Symbol;Acc:HGNC:12434]	0.2356	0.5387	0.241	0.6046	0.06755	0.8896
ENSG00000075142	SRI	sorcin [Source:HGNC Symbol;Acc:HGNC:11292]	-0.02887	0.9111	-0.02269	0.9547	-0.02255	0.9293
ENSG00000075151	EIF4G3	eukaryotic translation initiation factor 4 gamma 3 [Source:HGNC Symbol;Acc:HGNC:3298]	0.2402	0.2229	0.2461	0.2611	0.2631	0.1658
ENSG00000075218	GTSE1	G2 and S-phase expressed 1 [Source:HGNC Symbol;Acc:HGNC:13698]	-0.1575	0.7419	-0.1512	0.8094	-0.3646	0.3579
ENSG00000075223	SEMA3C	semaphorin 3C [Source:HGNC Symbol;Acc:HGNC:10725]	-0.07499	0.9155	-0.06863	0.9409	-0.164	0.8076
ENSG00000075234	TTC38	tetratricopeptide repeat domain 38 [Source:HGNC Symbol;Acc:HGNC:26082]	0.003074	0.9946	0.009684	0.991	-0.02196	0.9647
ENSG00000075239	ACAT1	acetyl-CoA acetyltransferase 1 [Source:HGNC Symbol;Acc:HGNC:93]	0.1257	0.6927	0.1319	0.7497	0.09404	0.7755
ENSG00000075240	GRAMD4	GRAM domain containing 4 [Source:HGNC Symbol;Acc:HGNC:29113]	0.4781	0.1327	0.4841	0.1741	0.4411	0.2129
ENSG00000075292	ZNF638	zinc finger protein 638 [Source:HGNC Symbol;Acc:HGNC:17894]	0.03787	0.821	0.04506	0.8516	0.04857	0.7694
ENSG00000075303	SLC25A40	solute carrier family 25 member 40 [Source:HGNC Symbol;Acc:HGNC:29680]	-0.08343	0.8482	-0.07589	0.8897	-0.2004	0.6025
ENSG00000075399	VPS9D1	VPS9 domain containing 1 [Source:HGNC Symbol;Acc:HGNC:13526]	0.1568	0.6916	0.1622	0.7181	0.2105	0.5649
ENSG00000075413	MARK3	microtubule affinity regulating kinase 3 [Source:HGNC Symbol;Acc:HGNC:6897]	0.04213	0.7685	0.04925	0.8257	0.06477	0.6003
ENSG00000075415	SLC25A3	solute carrier family 25 member 3 [Source:HGNC Symbol;Acc:HGNC:10989]	-0.07658	0.6754	-0.06911	0.7849	-0.04428	0.8453
ENSG00000075420	FNDC3B	fibronectin type III domain containing 3B [Source:HGNC Symbol;Acc:HGNC:24670]	0.024	0.9372	0.03115	0.9329	0.008003	0.9773
ENSG00000075426	FOSL2	FOS like 2, AP-1 transcription factor subunit [Source:HGNC Symbol;Acc:HGNC:3798]	0.03101	0.9358	0.03701	0.9376	0.06703	0.8345
ENSG00000075539	FRYL	FRY like transcription coactivator [Source:HGNC Symbol;Acc:HGNC:29127]	0.03421	0.8731	0.04108	0.8829	0.01881	0.931
ENSG00000075568	TMEM131	transmembrane protein 131 [Source:HGNC Symbol;Acc:HGNC:30366]	0.09753	0.7296	0.1037	0.7478	0.06633	0.8129
ENSG00000075618	FSCN1	fascin actin-bundling protein 1 [Source:HGNC Symbol;Acc:HGNC:11148]	-0.09004	0.8739	-0.08174	0.9128	-0.03874	0.9558
ENSG00000075624	ACTB	actin beta [Source:HGNC Symbol;Acc:HGNC:132]	-0.08185	0.7398	-0.07593	0.7931	-0.07188	0.7436
ENSG00000075651	PLD1	phospholipase D1 [Source:HGNC Symbol;Acc:HGNC:9067]	-0.04672	0.8992	-0.03924	0.9372	-0.1152	0.6912
ENSG00000075711	DLG1	discs large MAGUK scaffold protein 1 [Source:HGNC Symbol;Acc:HGNC:2900]	0.0096	0.9741	0.01931	0.9641	-0.04145	0.8386
ENSG00000075785	RAB7A	RAB7A, member RAS oncogene family [Source:HGNC Symbol;Acc:HGNC:9788]	-0.1208	0.2463	-0.1142	0.5027	-0.1156	0.2472
ENSG00000075826	SEC31B	SEC31 homolog B, COPII coat complex component [Source:HGNC Symbol;Acc:HGNC:23197]	0.05803	0.8529	0.06433	0.8794	0.03553	0.9175
ENSG00000075856	SART3	spliceosome associated factor 3, U4/U6 recycling protein [Source:HGNC Symbol;Acc:HGNC:16860]	-0.06732	0.7498	-0.05985	0.849	-0.07404	0.7279
ENSG00000075884	ARHGAP15	Rho GTPase activating protein 15 [Source:HGNC Symbol;Acc:HGNC:21030]	0.1698	0.4499	0.1773	0.4887	0.1592	0.537
ENSG00000075945	KIFAP3	kinesin associated protein 3 [Source:HGNC Symbol;Acc:HGNC:17060]	-0.07165	0.8816	-0.06557	0.9177	0.03235	0.945
ENSG00000075975	MKRN2	makorin ring finger protein 2 [Source:HGNC Symbol;Acc:HGNC:7113]	0.1722	0.2502	0.1785	0.3695	0.1901	0.2453
ENSG00000076003	MCM6	minichromosome maintenance complex component 6 [Source:HGNC Symbol;Acc:HGNC:6949]	-0.1274	0.8434	-0.1193	0.8762	-0.2267	0.7319
ENSG00000076043	REXO2	RNA exonuclease 2 [Source:HGNC Symbol;Acc:HGNC:17851]	0.1857	0.5585	0.1948	0.6203	0.08099	0.8392
ENSG00000076067	RBMS2	RNA binding motif single stranded interacting protein 2 [Source:HGNC Symbol;Acc:HGNC:9909]	-0.1067	0.7457	-0.09935	0.8135	-0.1948	0.4921
ENSG00000076108	BAZ2A	bromodomain adjacent to zinc finger domain 2A [Source:HGNC Symbol;Acc:HGNC:962]	0.008229	0.9744	0.01512	0.9703	0.0317	0.8534
ENSG00000076201	PTPN23	protein tyrosine phosphatase non-receptor type 23 [Source:HGNC Symbol;Acc:HGNC:14406]	-0.2496	0.07312	-0.2431	0.1842	-0.2199	0.1795
ENSG00000076242	MLH1	mutL homolog 1 [Source:HGNC Symbol;Acc:HGNC:7127]	-0.1774	0.2106	-0.17	0.432	-0.2005	0.2036
ENSG00000076258	FMO4	flavin containing dimethylaniline monoxygenase 4 [Source:HGNC Symbol;Acc:HGNC:3772]	-0.07765	0.8027	-0.07831	0.8702	-0.1517	0.5691
ENSG00000076321	KLHL20	kelch like family member 20 [Source:HGNC Symbol;Acc:HGNC:25056]	-0.06297	0.7723	-0.06538	0.849	-0.08784	0.6433
ENSG00000149972	CNTN5	contactin 5 [Source:HGNC Symbol;Acc:HGNC:2175]	1.724	0.00266	1.72	0.004334	1.408	0.07472
ENSG00000076513	ANKRD13A	ankyrin repeat domain 13A [Source:HGNC Symbol;Acc:HGNC:21268]	0.2583	0.07828	0.2652	0.1234	0.2888	0.07314
ENSG00000076555	ACACB	acetyl-CoA carboxylase beta [Source:HGNC Symbol;Acc:HGNC:85]	-0.5732	0.1519	-0.5661	0.2204	-0.6408	0.1819
ENSG00000171365	CLCN5	chloride voltage-gated channel 5 [Source:HGNC Symbol;Acc:HGNC:2023]	1.711	4.81e-06	1.716	4.686e-06	1.703	0.003562
ENSG00000076641	PAG1	phosphoprotein membrane anchor with glycosphingolipid microdomains 1 [Source:HGNC Symbol;Acc:HGNC:30043]	-0.5354	0.05857	-0.5292	0.06911	-0.5197	0.1178
ENSG00000076650	GPATCH1	G-patch domain containing 1 [Source:HGNC Symbol;Acc:HGNC:24658]	-0.3459	0.1534	-0.3395	0.2261	-0.3697	0.1868
ENSG00000076662	ICAM3	intercellular adhesion molecule 3 [Source:HGNC Symbol;Acc:HGNC:5346]	-0.1766	0.327	-0.1693	0.4351	-0.1354	0.447
ENSG00000076685	NT5C2	5'-nucleotidase, cytosolic II [Source:HGNC Symbol;Acc:HGNC:8022]	-0.05726	0.7958	-0.05	0.871	-0.06391	0.7276
ENSG00000076716	GPC4	glypican 4 [Source:HGNC Symbol;Acc:HGNC:4452]	1.767	0.07265	1.768	0.08786	1.401	0.3038
ENSG00000076864	RAP1GAP	RAP1 GTPase activating protein [Source:HGNC Symbol;Acc:HGNC:9858]	0.2762	0.5896	0.2849	0.625	0.2446	0.6846
ENSG00000076924	XAB2	XPA binding protein 2 [Source:HGNC Symbol;Acc:HGNC:14089]	0.03479	0.8845	0.04238	0.8888	0.07234	0.7119
ENSG00000076928	ARHGEF1	Rho guanine nucleotide exchange factor 1 [Source:HGNC Symbol;Acc:HGNC:681]	-0.01779	0.941	-0.0101	0.9792	0.01723	0.9293
ENSG00000076944	STXBP2	syntaxin binding protein 2 [Source:HGNC Symbol;Acc:HGNC:11445]	-0.05674	0.8046	-0.04893	0.8762	-0.01104	0.9667
ENSG00000076984	MAP2K7	mitogen-activated protein kinase kinase 7 [Source:HGNC Symbol;Acc:HGNC:6847]	-0.2094	0.2549	-0.2011	0.3392	-0.1517	0.4538
ENSG00000077044	DGKD	diacylglycerol kinase delta [Source:HGNC Symbol;Acc:HGNC:2851]	-0.06111	0.8489	-0.05434	0.894	-0.0722	0.8232
ENSG00000077097	TOP2B	DNA topoisomerase II beta [Source:HGNC Symbol;Acc:HGNC:11990]	-0.05785	0.7618	-0.05047	0.8509	-0.06364	0.7264
ENSG00000077147	TM9SF3	transmembrane 9 superfamily member 3 [Source:HGNC Symbol;Acc:HGNC:21529]	-0.2153	0.1929	-0.2076	0.276	-0.2228	0.1933
ENSG00000077150	NFKB2	nuclear factor kappa B subunit 2 [Source:HGNC Symbol;Acc:HGNC:7795]	0.06131	0.7767	0.06907	0.8078	0.1098	0.5395
ENSG00000077157	PPP1R12B	protein phosphatase 1 regulatory subunit 12B [Source:HGNC Symbol;Acc:HGNC:7619]	-0.2386	0.3711	-0.23	0.4416	-0.2037	0.4694
ENSG00000077232	DNAJC10	DnaJ heat shock protein family (Hsp40) member C10 [Source:HGNC Symbol;Acc:HGNC:24637]	0.4532	0.09941	0.4591	0.1364	0.3577	0.287
ENSG00000077235	GTF3C1	general transcription factor IIIC subunit 1 [Source:HGNC Symbol;Acc:HGNC:4664]	-0.04882	0.7949	-0.04151	0.884	-0.04431	0.8224
ENSG00000077238	IL4R	interleukin 4 receptor [Source:HGNC Symbol;Acc:HGNC:6015]	-0.02884	0.9563	-0.02064	0.9759	0.02174	0.9651
ENSG00000077254	USP33	ubiquitin specific peptidase 33 [Source:HGNC Symbol;Acc:HGNC:20059]	0.06146	0.7745	0.06834	0.8007	0.04177	0.8462
ENSG00000077312	SNRPA	small nuclear ribonucleoprotein polypeptide A [Source:HGNC Symbol;Acc:HGNC:11151]	0.2476	0.3041	0.2523	0.4075	0.2705	0.2762
ENSG00000077420	APBB1IP	amyloid beta precursor protein binding family B member 1 interacting protein [Source:HGNC Symbol;Acc:HGNC:17379]	0.01697	0.9474	0.02379	0.945	0.04874	0.7958
ENSG00000077454	LRCH4	leucine rich repeats and calponin homology domain containing 4 [Source:HGNC Symbol;Acc:HGNC:6691]	0.05703	0.7319	0.06403	0.7918	0.09115	0.5027
ENSG00000077458	FAM76B	family with sequence similarity 76 member B [Source:HGNC Symbol;Acc:HGNC:28492]	0.1126	0.5192	0.1208	0.5936	0.09061	0.5916
ENSG00000077463	SIRT6	sirtuin 6 [Source:HGNC Symbol;Acc:HGNC:14934]	0.1258	0.564	0.1336	0.6106	0.1512	0.4971
ENSG00000077514	POLD3	DNA polymerase delta 3, accessory subunit [Source:HGNC Symbol;Acc:HGNC:20932]	0.3442	0.07265	0.3512	0.1084	0.2638	0.2156
ENSG00000077549	CAPZB	capping actin protein of muscle Z-line subunit beta [Source:HGNC Symbol;Acc:HGNC:1491]	-0.1614	0.1417	-0.1547	0.3553	-0.1316	0.2635
ENSG00000077585	GPR137B	G protein-coupled receptor 137B [Source:HGNC Symbol;Acc:HGNC:11862]	0.201	0.7753	0.2061	0.8094	0.05275	0.9476
ENSG00000077684	JADE1	jade family PHD finger 1 [Source:HGNC Symbol;Acc:HGNC:30027]	0.2824	0.2199	0.2886	0.2648	0.3067	0.2138
ENSG00000077721	UBE2A	ubiquitin conjugating enzyme E2 A [Source:HGNC Symbol;Acc:HGNC:12472]	-0.00326	0.9876	0.004642	0.991	0.01424	0.9347
ENSG00000077782	FGFR1	fibroblast growth factor receptor 1 [Source:HGNC Symbol;Acc:HGNC:3688]	0.6298	0.08519	0.633	0.1155	0.8025	0.0556
ENSG00000077984	CST7	cystatin F [Source:HGNC Symbol;Acc:HGNC:2479]	-0.1355	0.8074	-0.1278	0.849	-0.157	0.7969
ENSG00000078043	PIAS2	protein inhibitor of activated STAT 2 [Source:HGNC Symbol;Acc:HGNC:17311]	-0.1209	0.8947	-0.114	0.9155	-0.3579	0.6669
ENSG00000078061	ARAF	A-Raf proto-oncogene, serine/threonine kinase [Source:HGNC Symbol;Acc:HGNC:646]	-0.1065	0.5435	-0.0989	0.6739	-0.06568	0.7507
ENSG00000078070	MCCC1	methylcrotonoyl-CoA carboxylase 1 [Source:HGNC Symbol;Acc:HGNC:6936]	0.1413	0.6189	0.1485	0.674	0.06354	0.8561
ENSG00000078081	LAMP3	lysosomal associated membrane protein 3 [Source:HGNC Symbol;Acc:HGNC:14582]	1.058	0.1028	1.06	0.1287	0.9833	0.2582
ENSG00000156738	MS4A1	membrane spanning 4-domains A1 [Source:HGNC Symbol;Acc:HGNC:7315]	1.701	0.03632	1.711	0.03473	1.086	0.3065
ENSG00000078114	NEBL	nebulette [Source:HGNC Symbol;Acc:HGNC:16932]	0.05908	0.9744	0.06201	0.9807	0.2292	0.891
ENSG00000078124	ACER3	alkaline ceramidase 3 [Source:HGNC Symbol;Acc:HGNC:16066]	0.01478	0.9746	0.02199	0.9737	-0.02048	0.9642
ENSG00000078140	UBE2K	ubiquitin conjugating enzyme E2 K [Source:HGNC Symbol;Acc:HGNC:4914]	0.1492	0.4152	0.1565	0.508	0.1075	0.5772
ENSG00000078142	PIK3C3	phosphatidylinositol 3-kinase catalytic subunit type 3 [Source:HGNC Symbol;Acc:HGNC:8974]	0.0659	0.6679	0.07382	0.7346	0.05875	0.6957
ENSG00000078269	SYNJ2	synaptojanin 2 [Source:HGNC Symbol;Acc:HGNC:11504]	-0.4227	0.2523	-0.417	0.3049	-0.4644	0.2206
ENSG00000078304	PPP2R5C	protein phosphatase 2 regulatory subunit B'gamma [Source:HGNC Symbol;Acc:HGNC:9311]	0.2009	0.1368	0.2074	0.2293	0.2021	0.1281
ENSG00000078328	RBFOX1	RNA binding fox-1 homolog 1 [Source:HGNC Symbol;Acc:HGNC:18222]	-0.792	0.1111	-0.7817	0.1852	-0.2213	0.7862
ENSG00000078369	GNB1	G protein subunit beta 1 [Source:HGNC Symbol;Acc:HGNC:4396]	-0.1384	0.1777	-0.1314	0.4266	-0.1242	0.2546
ENSG00000078401	EDN1	endothelin 1 [Source:HGNC Symbol;Acc:HGNC:3176]	-0.04485	0.9487	-0.03633	0.9728	-0.06066	0.9261
ENSG00000078403	MLLT10	MLLT10 histone lysine methyltransferase DOT1L cofactor [Source:HGNC Symbol;Acc:HGNC:16063]	-0.1491	0.4407	-0.1427	0.5905	-0.1217	0.5463
ENSG00000078487	ZCWPW1	zinc finger CW-type and PWWP domain containing 1 [Source:HGNC Symbol;Acc:HGNC:23486]	0.1	0.5604	0.1067	0.6197	0.1122	0.4885
ENSG00000078589	P2RY10	P2Y receptor family member 10 [Source:HGNC Symbol;Acc:HGNC:19906]	1.16	0.06092	1.165	0.05189	0.7884	0.3445
ENSG00000078618	NRDC	nardilysin convertase [Source:HGNC Symbol;Acc:HGNC:7995]	0.03576	0.7763	0.0429	0.849	0.04639	0.732
ENSG00000078668	VDAC3	voltage dependent anion channel 3 [Source:HGNC Symbol;Acc:HGNC:12674]	-0.03839	0.8257	-0.03305	0.9135	-0.02483	0.901
ENSG00000078674	PCM1	pericentriolar material 1 [Source:HGNC Symbol;Acc:HGNC:8727]	0.04723	0.8839	0.05361	0.8897	0.01074	0.9761
ENSG00000078687	TNRC6C	trinucleotide repeat containing adaptor 6C [Source:HGNC Symbol;Acc:HGNC:29318]	0.06685	0.7278	0.07376	0.7821	0.06865	0.715
ENSG00000078699	CBFA2T2	CBFA2/RUNX1 partner transcriptional co-repressor 2 [Source:HGNC Symbol;Acc:HGNC:1536]	-0.03225	0.8495	-0.02571	0.9334	-0.04524	0.7981
ENSG00000078747	ITCH	itchy E3 ubiquitin protein ligase [Source:HGNC Symbol;Acc:HGNC:13890]	-0.05369	0.7468	-0.04627	0.853	-0.0475	0.7594
ENSG00000078795	PKD2L2	polycystin 2 like 2, transient receptor potential cation channel [Source:HGNC Symbol;Acc:HGNC:9012]	0.1202	0.615	0.1275	0.6764	0.05573	0.846
ENSG00000078808	SDF4	stromal cell derived factor 4 [Source:HGNC Symbol;Acc:HGNC:24188]	-0.0731	0.679	-0.06598	0.7882	-0.03333	0.8598
ENSG00000078814	MYH7B	myosin heavy chain 7B [Source:HGNC Symbol;Acc:HGNC:15906]	0.2954	0.1985	0.3	0.2783	0.2986	0.2107
ENSG00000078902	TOLLIP	toll interacting protein [Source:HGNC Symbol;Acc:HGNC:16476]	-0.3271	0.05871	-0.3196	0.1024	-0.2824	0.1756
ENSG00000078967	UBE2D4	ubiquitin conjugating enzyme E2 D4 (putative) [Source:HGNC Symbol;Acc:HGNC:21647]	0.07964	0.7839	0.08456	0.8306	0.02515	0.9383
ENSG00000079134	THOC1	THO complex 1 [Source:HGNC Symbol;Acc:HGNC:19070]	-0.03739	0.955	-0.02973	0.9737	-0.2565	0.5404
ENSG00000079156	OSBPL6	oxysterol binding protein like 6 [Source:HGNC Symbol;Acc:HGNC:16388]	-0.4228	0.6654	-0.4148	0.7439	0.6898	0.3785
ENSG00000079246	XRCC5	X-ray repair cross complementing 5 [Source:HGNC Symbol;Acc:HGNC:12833]	-0.005738	0.9744	0.0006743	0.9985	0.002624	0.9885
ENSG00000079263	SP140	SP140 nuclear body protein [Source:HGNC Symbol;Acc:HGNC:17133]	0.6555	0.09645	0.6596	0.1204	0.5257	0.2613
ENSG00000079277	MKNK1	MAPK interacting serine/threonine kinase 1 [Source:HGNC Symbol;Acc:HGNC:7110]	-0.3177	0.072	-0.3102	0.1201	-0.2867	0.1246
ENSG00000079313	REXO1	RNA exonuclease 1 homolog [Source:HGNC Symbol;Acc:HGNC:24616]	-0.03038	0.9122	-0.02256	0.9538	0.02931	0.9107
ENSG00000079332	SAR1A	secretion associated Ras related GTPase 1A [Source:HGNC Symbol;Acc:HGNC:10534]	-0.05042	0.8068	-0.04314	0.8813	-0.02807	0.9007
ENSG00000079335	CDC14A	cell division cycle 14A [Source:HGNC Symbol;Acc:HGNC:1718]	0.1914	0.2919	0.1985	0.3644	0.1794	0.3385
ENSG00000079337	RAPGEF3	Rap guanine nucleotide exchange factor 3 [Source:HGNC Symbol;Acc:HGNC:16629]	0.2802	0.2859	0.2851	0.3725	0.2701	0.3482
ENSG00000079385	CEACAM1	CEA cell adhesion molecule 1 [Source:HGNC Symbol;Acc:HGNC:1814]	0.2344	0.5597	0.238	0.6159	0.1734	0.6914
ENSG00000079387	SENP1	SUMO specific peptidase 1 [Source:HGNC Symbol;Acc:HGNC:17927]	-0.0304	0.8475	-0.02177	0.9464	-0.04177	0.7951
ENSG00000079393	DUSP13	dual specificity phosphatase 13 [Source:HGNC Symbol;Acc:HGNC:19681]	-0.5115	0.2421	-0.5018	0.2961	-0.6981	0.1728
ENSG00000079432	CIC	capicua transcriptional repressor [Source:HGNC Symbol;Acc:HGNC:14214]	-0.2119	0.4322	-0.2037	0.503	-0.1744	0.5344
ENSG00000079435	LIPE	lipase E, hormone sensitive type [Source:HGNC Symbol;Acc:HGNC:6621]	0.1143	0.8028	0.1212	0.8327	-0.0641	0.9103
ENSG00000079459	FDFT1	farnesyl-diphosphate farnesyltransferase 1 [Source:HGNC Symbol;Acc:HGNC:3629]	0.05269	0.7429	0.05857	0.8078	0.05426	0.7413
ENSG00000079482	OPHN1	oligophrenin 1 [Source:HGNC Symbol;Acc:HGNC:8148]	-0.7188	0.1829	-0.7109	0.2867	-0.6788	0.3209
ENSG00000079616	KIF22	kinesin family member 22 [Source:HGNC Symbol;Acc:HGNC:6391]	0.1114	0.6833	0.1172	0.7443	0.09917	0.714
ENSG00000079739	PGM1	phosphoglucomutase 1 [Source:HGNC Symbol;Acc:HGNC:8905]	-0.2102	0.5432	-0.2012	0.6144	-0.2669	0.4102
ENSG00000079785	DDX1	DEAD-box helicase 1 [Source:HGNC Symbol;Acc:HGNC:2734]	0.338	0.335	0.3435	0.4142	0.4721	0.1856
ENSG00000079805	DNM2	dynamin 2 [Source:HGNC Symbol;Acc:HGNC:2974]	-0.12	0.3859	-0.1121	0.5797	-0.08338	0.577
ENSG00000079950	STX7	syntaxin 7 [Source:HGNC Symbol;Acc:HGNC:11442]	-0.086	0.6447	-0.07901	0.753	-0.08786	0.658
ENSG00000079974	RABL2B	RAB, member of RAS oncogene family like 2B [Source:HGNC Symbol;Acc:HGNC:9800]	0.174	0.4965	0.1837	0.5779	0.08393	0.7672
ENSG00000079999	KEAP1	kelch like ECH associated protein 1 [Source:HGNC Symbol;Acc:HGNC:23177]	-0.2436	0.2794	-0.2358	0.3893	-0.2667	0.2666
ENSG00000080189	SLC35C2	solute carrier family 35 member C2 [Source:HGNC Symbol;Acc:HGNC:17117]	-0.03729	0.8266	-0.03061	0.9125	-0.02049	0.9161
ENSG00000080298	RFX3	regulatory factor X3 [Source:HGNC Symbol;Acc:HGNC:9984]	0.1381	0.4932	0.1451	0.5637	0.1046	0.6283
ENSG00000080345	RIF1	replication timing regulatory factor 1 [Source:HGNC Symbol;Acc:HGNC:23207]	0.2816	0.318	0.2876	0.3549	0.2049	0.5115
ENSG00000080371	RAB21	RAB21, member RAS oncogene family [Source:HGNC Symbol;Acc:HGNC:18263]	0.07552	0.7268	0.08276	0.7481	0.09582	0.6023
ENSG00000080503	SMARCA2	SWI/SNF related, matrix associated, actin dependent regulator of chromatin, subfamily a, member 2 [Source:HGNC Symbol;Acc:HGNC:11098]	-0.02386	0.8964	-0.01628	0.9585	0.009738	0.9629
ENSG00000080546	SESN1	sestrin 1 [Source:HGNC Symbol;Acc:HGNC:21595]	0.1307	0.6535	0.138	0.689	0.1169	0.6955
ENSG00000080603	SRCAP	Snf2 related CREBBP activator protein [Source:HGNC Symbol;Acc:HGNC:16974]	-0.1891	0.3921	-0.1826	0.525	-0.1899	0.4363
ENSG00000080802	CNOT4	CCR4-NOT transcription complex subunit 4 [Source:HGNC Symbol;Acc:HGNC:7880]	0.1098	0.5472	0.1171	0.628	0.07735	0.6853
ENSG00000080815	PSEN1	presenilin 1 [Source:HGNC Symbol;Acc:HGNC:9508]	-0.113	0.3307	-0.1054	0.5591	-0.09409	0.4469
ENSG00000080822	CLDND1	claudin domain containing 1 [Source:HGNC Symbol;Acc:HGNC:1322]	-0.04305	0.9097	-0.03533	0.9433	-0.007286	0.9857
ENSG00000080823	MOK	MOK protein kinase [Source:HGNC Symbol;Acc:HGNC:9833]	-0.2315	0.5121	-0.2252	0.6019	-0.168	0.6605
ENSG00000080824	HSP90AA1	heat shock protein 90 alpha family class A member 1 [Source:HGNC Symbol;Acc:HGNC:5253]	0.142	0.4153	0.1488	0.4893	0.1598	0.3896
ENSG00000080845	DLGAP4	DLG associated protein 4 [Source:HGNC Symbol;Acc:HGNC:24476]	-0.08478	0.5523	-0.07799	0.7181	-0.05603	0.7256
ENSG00000080986	NDC80	NDC80 kinetochore complex component [Source:HGNC Symbol;Acc:HGNC:16909]	0.3596	0.3894	0.3633	0.4577	0.2479	0.6173
ENSG00000081014	AP4E1	adaptor related protein complex 4 subunit epsilon 1 [Source:HGNC Symbol;Acc:HGNC:573]	0.3242	0.3685	0.3288	0.432	0.3912	0.3049
ENSG00000081019	RSBN1	round spermatid basic protein 1 [Source:HGNC Symbol;Acc:HGNC:25642]	0.1245	0.5603	0.1318	0.6033	0.09397	0.683
ENSG00000081026	MAGI3	membrane associated guanylate kinase, WW and PDZ domain containing 3 [Source:HGNC Symbol;Acc:HGNC:29647]	-0.0906	0.8359	-0.08613	0.8818	-0.05095	0.9121
ENSG00000081041	CXCL2	C-X-C motif chemokine ligand 2 [Source:HGNC Symbol;Acc:HGNC:4603]	-0.5169	0.3289	-0.5076	0.4266	-0.5346	0.3742
ENSG00000081059	TCF7	transcription factor 7 [Source:HGNC Symbol;Acc:HGNC:11639]	-0.06201	0.8845	-0.05669	0.9218	-0.0645	0.8712
ENSG00000081087	OSTM1	osteoclastogenesis associated transmembrane protein 1 [Source:HGNC Symbol;Acc:HGNC:21652]	-0.07581	0.6812	-0.06783	0.8067	-0.1111	0.4944
ENSG00000081148	IMPG2	interphotoreceptor matrix proteoglycan 2 [Source:HGNC Symbol;Acc:HGNC:18362]	0.1571	0.7433	0.1617	0.7963	0.3552	0.3503
ENSG00000081154	PCNP	PEST proteolytic signal containing nuclear protein [Source:HGNC Symbol;Acc:HGNC:30023]	0.09562	0.6068	0.1035	0.6829	0.06449	0.7349
ENSG00000081181	ARG2	arginase 2 [Source:HGNC Symbol;Acc:HGNC:664]	-0.1308	0.6952	-0.1219	0.7839	-0.2285	0.3749
ENSG00000081189	MEF2C	myocyte enhancer factor 2C [Source:HGNC Symbol;Acc:HGNC:6996]	-0.1639	0.7224	-0.1575	0.7735	-0.1429	0.7788
ENSG00000081237	PTPRC	protein tyrosine phosphatase receptor type C [Source:HGNC Symbol;Acc:HGNC:9666]	0.0568	0.7513	0.06302	0.7743	0.08994	0.6353
ENSG00000081320	STK17B	serine/threonine kinase 17b [Source:HGNC Symbol;Acc:HGNC:11396]	0.1713	0.5598	0.1774	0.5925	0.1943	0.5491
ENSG00000081665	ZNF506	zinc finger protein 506 [Source:HGNC Symbol;Acc:HGNC:23780]	-0.05249	0.844	-0.04558	0.9076	-0.0505	0.8457
ENSG00000081721	DUSP12	dual specificity phosphatase 12 [Source:HGNC Symbol;Acc:HGNC:3067]	0.06583	0.8684	0.06663	0.9054	0.01031	0.9827
ENSG00000081760	AACS	acetoacetyl-CoA synthetase [Source:HGNC Symbol;Acc:HGNC:21298]	-0.1924	0.4116	-0.1849	0.5562	-0.2921	0.2328
ENSG00000081791	DELE1	DAP3 binding cell death enhancer 1 [Source:HGNC Symbol;Acc:HGNC:28969]	-0.159	0.3281	-0.151	0.4689	-0.1343	0.4808
ENSG00000081870	HSPB11	heat shock protein family B (small) member 11 [Source:HGNC Symbol;Acc:HGNC:25019]	0.08344	0.7664	0.09149	0.8011	0.02888	0.9271
ENSG00000160326	SLC2A6	solute carrier family 2 member 6 [Source:HGNC Symbol;Acc:HGNC:11011]	1.688	0.01472	1.68	0.01613	1.302	0.1728
ENSG00000082014	SMARCD3	SWI/SNF related, matrix associated, actin dependent regulator of chromatin, subfamily d, member 3 [Source:HGNC Symbol;Acc:HGNC:11108]	-0.3199	0.4132	-0.3166	0.4858	-0.3624	0.3891
ENSG00000082068	WDR70	WD repeat domain 70 [Source:HGNC Symbol;Acc:HGNC:25495]	-0.02672	0.9428	-0.01951	0.9737	-0.06111	0.8357
ENSG00000082074	FYB1	FYN binding protein 1 [Source:HGNC Symbol;Acc:HGNC:4036]	0.0548	0.786	0.06095	0.8149	0.08898	0.5807
ENSG00000082153	BZW1	basic leucine zipper and W2 domains 1 [Source:HGNC Symbol;Acc:HGNC:18380]	0.05758	0.7468	0.06491	0.7822	0.07666	0.6255
ENSG00000082212	ME2	malic enzyme 2 [Source:HGNC Symbol;Acc:HGNC:6984]	0.0618	0.7909	0.06862	0.8127	0.05633	0.8111
ENSG00000082213	C5orf22	chromosome 5 open reading frame 22 [Source:HGNC Symbol;Acc:HGNC:25639]	-0.03928	0.9226	-0.03412	0.9542	-0.0001181	0.9999
ENSG00000082258	CCNT2	cyclin T2 [Source:HGNC Symbol;Acc:HGNC:1600]	-0.02777	0.8853	-0.01998	0.9493	-0.04069	0.8175
ENSG00000082269	FAM135A	family with sequence similarity 135 member A [Source:HGNC Symbol;Acc:HGNC:21084]	0.4908	0.2095	0.4957	0.259	0.4125	0.3683
ENSG00000082397	EPB41L3	erythrocyte membrane protein band 4.1 like 3 [Source:HGNC Symbol;Acc:HGNC:3380]	0.8793	0.257	0.8779	0.2928	0.01818	0.9889
ENSG00000082515	MRPL22	mitochondrial ribosomal protein L22 [Source:HGNC Symbol;Acc:HGNC:14480]	0.1059	0.6927	0.1122	0.7497	0.08841	0.7413
ENSG00000082641	NFE2L1	nuclear factor, erythroid 2 like 1 [Source:HGNC Symbol;Acc:HGNC:7781]	-0.1647	0.2218	-0.1576	0.3784	-0.1577	0.281
ENSG00000082701	GSK3B	glycogen synthase kinase 3 beta [Source:HGNC Symbol;Acc:HGNC:4617]	0.007673	0.9744	0.01449	0.9686	0.03202	0.862
ENSG00000082805	ERC1	ELKS/RAB6-interacting/CAST family member 1 [Source:HGNC Symbol;Acc:HGNC:17072]	0.1483	0.4426	0.1558	0.5475	0.0682	0.7755
ENSG00000082898	XPO1	exportin 1 [Source:HGNC Symbol;Acc:HGNC:12825]	0.3308	0.2371	0.3363	0.2796	0.3547	0.2582
ENSG00000083097	DOP1A	DOP1 leucine zipper like protein A [Source:HGNC Symbol;Acc:HGNC:21194]	-0.0706	0.8475	-0.06249	0.8987	-0.1907	0.5186
ENSG00000083099	LYRM2	LYR motif containing 2 [Source:HGNC Symbol;Acc:HGNC:25229]	-0.03456	0.9116	-0.02552	0.9591	-0.1284	0.6118
ENSG00000083168	KAT6A	lysine acetyltransferase 6A [Source:HGNC Symbol;Acc:HGNC:13013]	-0.02002	0.9261	-0.01263	0.9739	-0.0002239	0.9993
ENSG00000083223	TUT7	terminal uridylyl transferase 7 [Source:HGNC Symbol;Acc:HGNC:25817]	0.01083	0.9741	0.01764	0.967	0.04454	0.8296
ENSG00000083312	TNPO1	transportin 1 [Source:HGNC Symbol;Acc:HGNC:6401]	0.06602	0.8489	0.07358	0.8571	0.03642	0.9205
ENSG00000083444	PLOD1	procollagen-lysine,2-oxoglutarate 5-dioxygenase 1 [Source:HGNC Symbol;Acc:HGNC:9081]	-0.4935	0.05404	-0.4869	0.06533	-0.4629	0.1481
ENSG00000083457	ITGAE	integrin subunit alpha E [Source:HGNC Symbol;Acc:HGNC:6147]	0.113	0.8034	0.1177	0.8366	0.1187	0.8042
[truncated: 8,145 more rows]

## Sheet: Eosinophils
Table S5c. Differential gene expression of eosinophils from cure vs TF patients. Contrast numerator: TF. Contrast denominator: Cure.
[truncated: 10,531 more rows]
